# Supplementary material for: Hypoelectronic diruthenaboranes and diosmaboranes having eight to twelve vertices: capped isocloso and bicapped closo structures
Source: Royal Society of Chemistry journal article supplement (doi:10.1039/c3nj00460k), 2013-01-01
Supplement: c3nj00460k.pdf [file c3nj00460k.pdf]

# Hypoelectronic Diruthenaboranes and Diosmaboranes Having Eight to Twelve Vertices: Capped *Isocloso* and Bicapped *Closo* Structures

Alexandru Lupan<sup>1</sup> and R. Bruce King\*<sup>2</sup>

<sup>1</sup>*Faculty of Chemistry and Chemical Engineering, Babeş-Bolyai University, Cluj-Napoca, Romania*

<sup>2</sup>*Department of Chemistry, University of Georgia, Athens, Georgia, 30602*

## Supporting Information

- Table S1.** The  $\text{Cp}_2\text{Ru}_2\text{B}_6\text{H}_6$  structures.  
**Table S2.** The  $\text{Cp}_2\text{Ru}_2\text{B}_7\text{H}_7$  structures.  
**Table S3.** The  $\text{Cp}_2\text{Ru}_2\text{B}_8\text{H}_8$  structures.  
**Table S4.** The  $\text{Cp}_2\text{Ru}_2\text{B}_9\text{H}_9$  structures.  
**Table S5.** The  $\text{Cp}_2\text{Ru}_2\text{B}_{10}\text{H}_{10}$  structures  
**Table S6.** The  $\text{Cp}_2\text{Os}_2\text{B}_6\text{H}_6$  structures.  
**Table S7.** The  $\text{Cp}_2\text{Os}_2\text{B}_7\text{H}_7$  structures.  
**Table S8.** The  $\text{Cp}_2\text{Os}_2\text{B}_8\text{H}_8$  structures.  
**Table S9.** The  $\text{Cp}_2\text{Os}_2\text{B}_9\text{H}_9$  structures.  
**Table S10.** The  $\text{Cp}_2\text{Os}_2\text{B}_{10}\text{H}_{10}$  structures.  
Complete Gaussian09 Reference (reference 33)

## The 8-vertex $\text{Cp}_2\text{Ru}_2\text{B}_6\text{H}_6$ System

Table S1A. Initial structures

Table S1B Best structures distances

Table S1C. Global ranking of all structures

Table S1A. Initial  $\text{Cp}_2\text{Ru}_2\text{B}_6\text{H}_6$  structures (one example from each family); 84 structures in total

|                                                                                                                                             |                                                                                                                                                 |                                                                                                                         |
|---------------------------------------------------------------------------------------------------------------------------------------------|-------------------------------------------------------------------------------------------------------------------------------------------------|-------------------------------------------------------------------------------------------------------------------------|
| <p><b>Initial structures</b></p>                                                                                                            | 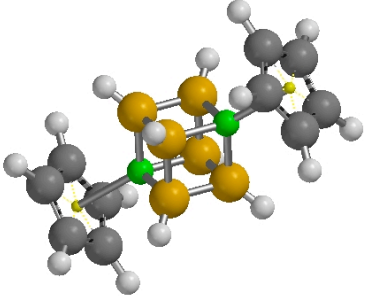 <p>1. Cube 3</p>                                              |  <p>2. Antiprism 4</p>               |
|  <p>3. Trigonal Prism 6</p>                                |  <p>4. Trigonal Antiprism 8</p>                                |  <p>5. Bisdisphenoid 6</p>           |
|  <p>6. Hexagonal bipyramid 4</p>                         |  <p>7. All-capped tetrahedron 5</p>                          |  <p>8. Nido structure 9</p>        |
|  <p>9. Dicapped trigonal prism (<math>C_3</math>) 18</p> |  <p>10. Dicapped trigonal prism (<math>C_{2v}</math>) 10</p> |  <p>11. Dicapped octahedron 11</p> |

Table S1B: Distances table for the lowest energy Cp<sub>2</sub>Ru<sub>2</sub>B<sub>6</sub>H<sub>6</sub> structures

| 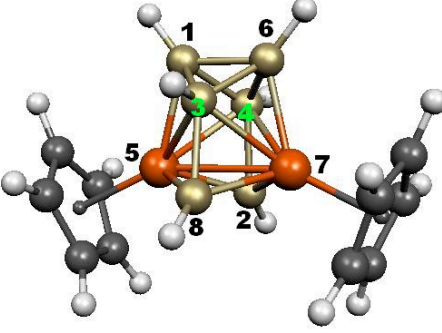 <p><b>1</b> -729.79164209 0.0 kcal/mole C<sub>2v</sub></p> | <table border="1"> <thead> <tr> <th></th> <th>1</th> <th>2</th> <th>3</th> <th>4</th> <th>5</th> </tr> </thead> <tbody> <tr><td>1 B</td><td>0.000000</td><td></td><td></td><td></td><td></td></tr> <tr><td>2 B</td><td>3.087090</td><td>0.000000</td><td></td><td></td><td></td></tr> <tr><td>3 B</td><td>1.740153</td><td>3.271393</td><td>0.000000</td><td></td><td></td></tr> <tr><td>4 B</td><td>1.740135</td><td>1.781833</td><td>2.557766</td><td>0.000000</td><td></td></tr> <tr><td>5 Ru</td><td>2.135975</td><td>2.059082</td><td>2.259490</td><td>2.259710</td><td>0.000000</td></tr> <tr><td>6 B</td><td>1.733525</td><td>3.087880</td><td>1.740135</td><td>1.740153</td><td>3.042886</td></tr> <tr><td>7 Ru</td><td>3.042886</td><td>2.060627</td><td>2.259710</td><td>2.259490</td><td>2.709373</td></tr> <tr><td>8 B</td><td>3.087880</td><td>2.942837</td><td>1.781833</td><td>3.271393</td><td>2.060627</td></tr> <tr><td></td><td>6</td><td>7</td><td>8</td><td></td><td></td></tr> <tr><td>6 B</td><td>0.000000</td><td></td><td></td><td></td><td></td></tr> <tr><td>7 Ru</td><td>2.135975</td><td>0.000000</td><td></td><td></td><td></td></tr> <tr><td>8 B</td><td>3.087090</td><td>2.059082</td><td>0.000000</td><td></td><td></td></tr> </tbody> </table> |          | 1        | 2        | 3        | 4 | 5 | 1 B  | 0.000000 |  |  |  |  | 2 B  | 3.087090 | 0.000000 |  |  |  | 3 B | 1.740153 | 3.271393 | 0.000000 |  |  | 4 B | 1.740135 | 1.781833 | 2.557766 | 0.000000 |  | 5 Ru | 2.135975 | 2.059082 | 2.259490 | 2.259710 | 0.000000 | 6 B | 1.733525 | 3.087880 | 1.740135 | 1.740153 | 3.042886 | 7 Ru | 3.042886 | 2.060627 | 2.259710 | 2.259490 | 2.709373 | 8 B  | 3.087880 | 2.942837 | 1.781833 | 3.271393 | 2.060627 |  | 6 | 7 | 8 |  |  | 6 B | 0.000000 |  |  |  |  | 7 Ru | 2.135975 | 0.000000 |  |  |  | 8 B  | 3.087090 | 2.059082 | 0.000000 |  |  |
|----------------------------------------------------------------------------------------------------------------------------------------------|----------------------------------------------------------------------------------------------------------------------------------------------------------------------------------------------------------------------------------------------------------------------------------------------------------------------------------------------------------------------------------------------------------------------------------------------------------------------------------------------------------------------------------------------------------------------------------------------------------------------------------------------------------------------------------------------------------------------------------------------------------------------------------------------------------------------------------------------------------------------------------------------------------------------------------------------------------------------------------------------------------------------------------------------------------------------------------------------------------------------------------------------------------------------------------------------------------------------------------------------------------------------------------|----------|----------|----------|----------|---|---|------|----------|--|--|--|--|------|----------|----------|--|--|--|-----|----------|----------|----------|--|--|-----|----------|----------|----------|----------|--|------|----------|----------|----------|----------|----------|-----|----------|----------|----------|----------|----------|------|----------|----------|----------|----------|----------|------|----------|----------|----------|----------|----------|--|---|---|---|--|--|-----|----------|--|--|--|--|------|----------|----------|--|--|--|------|----------|----------|----------|--|--|
|                                                                                                                                              | 1                                                                                                                                                                                                                                                                                                                                                                                                                                                                                                                                                                                                                                                                                                                                                                                                                                                                                                                                                                                                                                                                                                                                                                                                                                                                                | 2        | 3        | 4        | 5        |   |   |      |          |  |  |  |  |      |          |          |  |  |  |     |          |          |          |  |  |     |          |          |          |          |  |      |          |          |          |          |          |     |          |          |          |          |          |      |          |          |          |          |          |      |          |          |          |          |          |  |   |   |   |  |  |     |          |  |  |  |  |      |          |          |  |  |  |      |          |          |          |  |  |
| 1 B                                                                                                                                          | 0.000000                                                                                                                                                                                                                                                                                                                                                                                                                                                                                                                                                                                                                                                                                                                                                                                                                                                                                                                                                                                                                                                                                                                                                                                                                                                                         |          |          |          |          |   |   |      |          |  |  |  |  |      |          |          |  |  |  |     |          |          |          |  |  |     |          |          |          |          |  |      |          |          |          |          |          |     |          |          |          |          |          |      |          |          |          |          |          |      |          |          |          |          |          |  |   |   |   |  |  |     |          |  |  |  |  |      |          |          |  |  |  |      |          |          |          |  |  |
| 2 B                                                                                                                                          | 3.087090                                                                                                                                                                                                                                                                                                                                                                                                                                                                                                                                                                                                                                                                                                                                                                                                                                                                                                                                                                                                                                                                                                                                                                                                                                                                         | 0.000000 |          |          |          |   |   |      |          |  |  |  |  |      |          |          |  |  |  |     |          |          |          |  |  |     |          |          |          |          |  |      |          |          |          |          |          |     |          |          |          |          |          |      |          |          |          |          |          |      |          |          |          |          |          |  |   |   |   |  |  |     |          |  |  |  |  |      |          |          |  |  |  |      |          |          |          |  |  |
| 3 B                                                                                                                                          | 1.740153                                                                                                                                                                                                                                                                                                                                                                                                                                                                                                                                                                                                                                                                                                                                                                                                                                                                                                                                                                                                                                                                                                                                                                                                                                                                         | 3.271393 | 0.000000 |          |          |   |   |      |          |  |  |  |  |      |          |          |  |  |  |     |          |          |          |  |  |     |          |          |          |          |  |      |          |          |          |          |          |     |          |          |          |          |          |      |          |          |          |          |          |      |          |          |          |          |          |  |   |   |   |  |  |     |          |  |  |  |  |      |          |          |  |  |  |      |          |          |          |  |  |
| 4 B                                                                                                                                          | 1.740135                                                                                                                                                                                                                                                                                                                                                                                                                                                                                                                                                                                                                                                                                                                                                                                                                                                                                                                                                                                                                                                                                                                                                                                                                                                                         | 1.781833 | 2.557766 | 0.000000 |          |   |   |      |          |  |  |  |  |      |          |          |  |  |  |     |          |          |          |  |  |     |          |          |          |          |  |      |          |          |          |          |          |     |          |          |          |          |          |      |          |          |          |          |          |      |          |          |          |          |          |  |   |   |   |  |  |     |          |  |  |  |  |      |          |          |  |  |  |      |          |          |          |  |  |
| 5 Ru                                                                                                                                         | 2.135975                                                                                                                                                                                                                                                                                                                                                                                                                                                                                                                                                                                                                                                                                                                                                                                                                                                                                                                                                                                                                                                                                                                                                                                                                                                                         | 2.059082 | 2.259490 | 2.259710 | 0.000000 |   |   |      |          |  |  |  |  |      |          |          |  |  |  |     |          |          |          |  |  |     |          |          |          |          |  |      |          |          |          |          |          |     |          |          |          |          |          |      |          |          |          |          |          |      |          |          |          |          |          |  |   |   |   |  |  |     |          |  |  |  |  |      |          |          |  |  |  |      |          |          |          |  |  |
| 6 B                                                                                                                                          | 1.733525                                                                                                                                                                                                                                                                                                                                                                                                                                                                                                                                                                                                                                                                                                                                                                                                                                                                                                                                                                                                                                                                                                                                                                                                                                                                         | 3.087880 | 1.740135 | 1.740153 | 3.042886 |   |   |      |          |  |  |  |  |      |          |          |  |  |  |     |          |          |          |  |  |     |          |          |          |          |  |      |          |          |          |          |          |     |          |          |          |          |          |      |          |          |          |          |          |      |          |          |          |          |          |  |   |   |   |  |  |     |          |  |  |  |  |      |          |          |  |  |  |      |          |          |          |  |  |
| 7 Ru                                                                                                                                         | 3.042886                                                                                                                                                                                                                                                                                                                                                                                                                                                                                                                                                                                                                                                                                                                                                                                                                                                                                                                                                                                                                                                                                                                                                                                                                                                                         | 2.060627 | 2.259710 | 2.259490 | 2.709373 |   |   |      |          |  |  |  |  |      |          |          |  |  |  |     |          |          |          |  |  |     |          |          |          |          |  |      |          |          |          |          |          |     |          |          |          |          |          |      |          |          |          |          |          |      |          |          |          |          |          |  |   |   |   |  |  |     |          |  |  |  |  |      |          |          |  |  |  |      |          |          |          |  |  |
| 8 B                                                                                                                                          | 3.087880                                                                                                                                                                                                                                                                                                                                                                                                                                                                                                                                                                                                                                                                                                                                                                                                                                                                                                                                                                                                                                                                                                                                                                                                                                                                         | 2.942837 | 1.781833 | 3.271393 | 2.060627 |   |   |      |          |  |  |  |  |      |          |          |  |  |  |     |          |          |          |  |  |     |          |          |          |          |  |      |          |          |          |          |          |     |          |          |          |          |          |      |          |          |          |          |          |      |          |          |          |          |          |  |   |   |   |  |  |     |          |  |  |  |  |      |          |          |  |  |  |      |          |          |          |  |  |
|                                                                                                                                              | 6                                                                                                                                                                                                                                                                                                                                                                                                                                                                                                                                                                                                                                                                                                                                                                                                                                                                                                                                                                                                                                                                                                                                                                                                                                                                                | 7        | 8        |          |          |   |   |      |          |  |  |  |  |      |          |          |  |  |  |     |          |          |          |  |  |     |          |          |          |          |  |      |          |          |          |          |          |     |          |          |          |          |          |      |          |          |          |          |          |      |          |          |          |          |          |  |   |   |   |  |  |     |          |  |  |  |  |      |          |          |  |  |  |      |          |          |          |  |  |
| 6 B                                                                                                                                          | 0.000000                                                                                                                                                                                                                                                                                                                                                                                                                                                                                                                                                                                                                                                                                                                                                                                                                                                                                                                                                                                                                                                                                                                                                                                                                                                                         |          |          |          |          |   |   |      |          |  |  |  |  |      |          |          |  |  |  |     |          |          |          |  |  |     |          |          |          |          |  |      |          |          |          |          |          |     |          |          |          |          |          |      |          |          |          |          |          |      |          |          |          |          |          |  |   |   |   |  |  |     |          |  |  |  |  |      |          |          |  |  |  |      |          |          |          |  |  |
| 7 Ru                                                                                                                                         | 2.135975                                                                                                                                                                                                                                                                                                                                                                                                                                                                                                                                                                                                                                                                                                                                                                                                                                                                                                                                                                                                                                                                                                                                                                                                                                                                         | 0.000000 |          |          |          |   |   |      |          |  |  |  |  |      |          |          |  |  |  |     |          |          |          |  |  |     |          |          |          |          |  |      |          |          |          |          |          |     |          |          |          |          |          |      |          |          |          |          |          |      |          |          |          |          |          |  |   |   |   |  |  |     |          |  |  |  |  |      |          |          |  |  |  |      |          |          |          |  |  |
| 8 B                                                                                                                                          | 3.087090                                                                                                                                                                                                                                                                                                                                                                                                                                                                                                                                                                                                                                                                                                                                                                                                                                                                                                                                                                                                                                                                                                                                                                                                                                                                         | 2.059082 | 0.000000 |          |          |   |   |      |          |  |  |  |  |      |          |          |  |  |  |     |          |          |          |  |  |     |          |          |          |          |  |      |          |          |          |          |          |     |          |          |          |          |          |      |          |          |          |          |          |      |          |          |          |          |          |  |   |   |   |  |  |     |          |  |  |  |  |      |          |          |  |  |  |      |          |          |          |  |  |
|  <p><b>2.</b> -729.75565119 +22.6 C<sub>s</sub></p>         | <table border="1"> <thead> <tr> <th></th> <th>1</th> <th>2</th> <th>3</th> <th>4</th> <th>5</th> </tr> </thead> <tbody> <tr><td>1 Ru</td><td>0.000000</td><td></td><td></td><td></td><td></td></tr> <tr><td>2 Ru</td><td>2.728800</td><td>0.000000</td><td></td><td></td><td></td></tr> <tr><td>3 B</td><td>2.162919</td><td>3.036720</td><td>0.000000</td><td></td><td></td></tr> <tr><td>4 B</td><td>3.036720</td><td>2.162919</td><td>1.665000</td><td>0.000000</td><td></td></tr> <tr><td>5 B</td><td>2.109121</td><td>2.109121</td><td>3.102041</td><td>3.102041</td><td>0.000000</td></tr> <tr><td>6 B</td><td>2.278672</td><td>2.278672</td><td>1.762211</td><td>1.762211</td><td>1.746506</td></tr> <tr><td>7 B</td><td>2.019094</td><td>2.019094</td><td>3.678384</td><td>3.678384</td><td>1.929975</td></tr> <tr><td>8 B</td><td>2.208854</td><td>2.208854</td><td>1.749452</td><td>1.749452</td><td>3.252744</td></tr> <tr><td></td><td>6</td><td>7</td><td>8</td><td></td><td></td></tr> <tr><td>6 B</td><td>0.000000</td><td></td><td></td><td></td><td></td></tr> <tr><td>7 B</td><td>3.093204</td><td>0.000000</td><td></td><td></td><td></td></tr> <tr><td>8 B</td><td>2.566945</td><td>2.925824</td><td>0.000000</td><td></td><td></td></tr> </tbody> </table>  |          | 1        | 2        | 3        | 4 | 5 | 1 Ru | 0.000000 |  |  |  |  | 2 Ru | 2.728800 | 0.000000 |  |  |  | 3 B | 2.162919 | 3.036720 | 0.000000 |  |  | 4 B | 3.036720 | 2.162919 | 1.665000 | 0.000000 |  | 5 B  | 2.109121 | 2.109121 | 3.102041 | 3.102041 | 0.000000 | 6 B | 2.278672 | 2.278672 | 1.762211 | 1.762211 | 1.746506 | 7 B  | 2.019094 | 2.019094 | 3.678384 | 3.678384 | 1.929975 | 8 B  | 2.208854 | 2.208854 | 1.749452 | 1.749452 | 3.252744 |  | 6 | 7 | 8 |  |  | 6 B | 0.000000 |  |  |  |  | 7 B  | 3.093204 | 0.000000 |  |  |  | 8 B  | 2.566945 | 2.925824 | 0.000000 |  |  |
|                                                                                                                                              | 1                                                                                                                                                                                                                                                                                                                                                                                                                                                                                                                                                                                                                                                                                                                                                                                                                                                                                                                                                                                                                                                                                                                                                                                                                                                                                | 2        | 3        | 4        | 5        |   |   |      |          |  |  |  |  |      |          |          |  |  |  |     |          |          |          |  |  |     |          |          |          |          |  |      |          |          |          |          |          |     |          |          |          |          |          |      |          |          |          |          |          |      |          |          |          |          |          |  |   |   |   |  |  |     |          |  |  |  |  |      |          |          |  |  |  |      |          |          |          |  |  |
| 1 Ru                                                                                                                                         | 0.000000                                                                                                                                                                                                                                                                                                                                                                                                                                                                                                                                                                                                                                                                                                                                                                                                                                                                                                                                                                                                                                                                                                                                                                                                                                                                         |          |          |          |          |   |   |      |          |  |  |  |  |      |          |          |  |  |  |     |          |          |          |  |  |     |          |          |          |          |  |      |          |          |          |          |          |     |          |          |          |          |          |      |          |          |          |          |          |      |          |          |          |          |          |  |   |   |   |  |  |     |          |  |  |  |  |      |          |          |  |  |  |      |          |          |          |  |  |
| 2 Ru                                                                                                                                         | 2.728800                                                                                                                                                                                                                                                                                                                                                                                                                                                                                                                                                                                                                                                                                                                                                                                                                                                                                                                                                                                                                                                                                                                                                                                                                                                                         | 0.000000 |          |          |          |   |   |      |          |  |  |  |  |      |          |          |  |  |  |     |          |          |          |  |  |     |          |          |          |          |  |      |          |          |          |          |          |     |          |          |          |          |          |      |          |          |          |          |          |      |          |          |          |          |          |  |   |   |   |  |  |     |          |  |  |  |  |      |          |          |  |  |  |      |          |          |          |  |  |
| 3 B                                                                                                                                          | 2.162919                                                                                                                                                                                                                                                                                                                                                                                                                                                                                                                                                                                                                                                                                                                                                                                                                                                                                                                                                                                                                                                                                                                                                                                                                                                                         | 3.036720 | 0.000000 |          |          |   |   |      |          |  |  |  |  |      |          |          |  |  |  |     |          |          |          |  |  |     |          |          |          |          |  |      |          |          |          |          |          |     |          |          |          |          |          |      |          |          |          |          |          |      |          |          |          |          |          |  |   |   |   |  |  |     |          |  |  |  |  |      |          |          |  |  |  |      |          |          |          |  |  |
| 4 B                                                                                                                                          | 3.036720                                                                                                                                                                                                                                                                                                                                                                                                                                                                                                                                                                                                                                                                                                                                                                                                                                                                                                                                                                                                                                                                                                                                                                                                                                                                         | 2.162919 | 1.665000 | 0.000000 |          |   |   |      |          |  |  |  |  |      |          |          |  |  |  |     |          |          |          |  |  |     |          |          |          |          |  |      |          |          |          |          |          |     |          |          |          |          |          |      |          |          |          |          |          |      |          |          |          |          |          |  |   |   |   |  |  |     |          |  |  |  |  |      |          |          |  |  |  |      |          |          |          |  |  |
| 5 B                                                                                                                                          | 2.109121                                                                                                                                                                                                                                                                                                                                                                                                                                                                                                                                                                                                                                                                                                                                                                                                                                                                                                                                                                                                                                                                                                                                                                                                                                                                         | 2.109121 | 3.102041 | 3.102041 | 0.000000 |   |   |      |          |  |  |  |  |      |          |          |  |  |  |     |          |          |          |  |  |     |          |          |          |          |  |      |          |          |          |          |          |     |          |          |          |          |          |      |          |          |          |          |          |      |          |          |          |          |          |  |   |   |   |  |  |     |          |  |  |  |  |      |          |          |  |  |  |      |          |          |          |  |  |
| 6 B                                                                                                                                          | 2.278672                                                                                                                                                                                                                                                                                                                                                                                                                                                                                                                                                                                                                                                                                                                                                                                                                                                                                                                                                                                                                                                                                                                                                                                                                                                                         | 2.278672 | 1.762211 | 1.762211 | 1.746506 |   |   |      |          |  |  |  |  |      |          |          |  |  |  |     |          |          |          |  |  |     |          |          |          |          |  |      |          |          |          |          |          |     |          |          |          |          |          |      |          |          |          |          |          |      |          |          |          |          |          |  |   |   |   |  |  |     |          |  |  |  |  |      |          |          |  |  |  |      |          |          |          |  |  |
| 7 B                                                                                                                                          | 2.019094                                                                                                                                                                                                                                                                                                                                                                                                                                                                                                                                                                                                                                                                                                                                                                                                                                                                                                                                                                                                                                                                                                                                                                                                                                                                         | 2.019094 | 3.678384 | 3.678384 | 1.929975 |   |   |      |          |  |  |  |  |      |          |          |  |  |  |     |          |          |          |  |  |     |          |          |          |          |  |      |          |          |          |          |          |     |          |          |          |          |          |      |          |          |          |          |          |      |          |          |          |          |          |  |   |   |   |  |  |     |          |  |  |  |  |      |          |          |  |  |  |      |          |          |          |  |  |
| 8 B                                                                                                                                          | 2.208854                                                                                                                                                                                                                                                                                                                                                                                                                                                                                                                                                                                                                                                                                                                                                                                                                                                                                                                                                                                                                                                                                                                                                                                                                                                                         | 2.208854 | 1.749452 | 1.749452 | 3.252744 |   |   |      |          |  |  |  |  |      |          |          |  |  |  |     |          |          |          |  |  |     |          |          |          |          |  |      |          |          |          |          |          |     |          |          |          |          |          |      |          |          |          |          |          |      |          |          |          |          |          |  |   |   |   |  |  |     |          |  |  |  |  |      |          |          |  |  |  |      |          |          |          |  |  |
|                                                                                                                                              | 6                                                                                                                                                                                                                                                                                                                                                                                                                                                                                                                                                                                                                                                                                                                                                                                                                                                                                                                                                                                                                                                                                                                                                                                                                                                                                | 7        | 8        |          |          |   |   |      |          |  |  |  |  |      |          |          |  |  |  |     |          |          |          |  |  |     |          |          |          |          |  |      |          |          |          |          |          |     |          |          |          |          |          |      |          |          |          |          |          |      |          |          |          |          |          |  |   |   |   |  |  |     |          |  |  |  |  |      |          |          |  |  |  |      |          |          |          |  |  |
| 6 B                                                                                                                                          | 0.000000                                                                                                                                                                                                                                                                                                                                                                                                                                                                                                                                                                                                                                                                                                                                                                                                                                                                                                                                                                                                                                                                                                                                                                                                                                                                         |          |          |          |          |   |   |      |          |  |  |  |  |      |          |          |  |  |  |     |          |          |          |  |  |     |          |          |          |          |  |      |          |          |          |          |          |     |          |          |          |          |          |      |          |          |          |          |          |      |          |          |          |          |          |  |   |   |   |  |  |     |          |  |  |  |  |      |          |          |  |  |  |      |          |          |          |  |  |
| 7 B                                                                                                                                          | 3.093204                                                                                                                                                                                                                                                                                                                                                                                                                                                                                                                                                                                                                                                                                                                                                                                                                                                                                                                                                                                                                                                                                                                                                                                                                                                                         | 0.000000 |          |          |          |   |   |      |          |  |  |  |  |      |          |          |  |  |  |     |          |          |          |  |  |     |          |          |          |          |  |      |          |          |          |          |          |     |          |          |          |          |          |      |          |          |          |          |          |      |          |          |          |          |          |  |   |   |   |  |  |     |          |  |  |  |  |      |          |          |  |  |  |      |          |          |          |  |  |
| 8 B                                                                                                                                          | 2.566945                                                                                                                                                                                                                                                                                                                                                                                                                                                                                                                                                                                                                                                                                                                                                                                                                                                                                                                                                                                                                                                                                                                                                                                                                                                                         | 2.925824 | 0.000000 |          |          |   |   |      |          |  |  |  |  |      |          |          |  |  |  |     |          |          |          |  |  |     |          |          |          |          |  |      |          |          |          |          |          |     |          |          |          |          |          |      |          |          |          |          |          |      |          |          |          |          |          |  |   |   |   |  |  |     |          |  |  |  |  |      |          |          |  |  |  |      |          |          |          |  |  |
|  <p><b>3.</b> -729.74585278 +28.7</p>                     | <table border="1"> <thead> <tr> <th></th> <th>1</th> <th>2</th> <th>3</th> <th>4</th> <th>5</th> </tr> </thead> <tbody> <tr><td>1 B</td><td>0.000000</td><td></td><td></td><td></td><td></td></tr> <tr><td>2 Ru</td><td>2.150843</td><td>0.000000</td><td></td><td></td><td></td></tr> <tr><td>3 B</td><td>1.815620</td><td>3.094773</td><td>0.000000</td><td></td><td></td></tr> <tr><td>4 B</td><td>2.574326</td><td>2.306370</td><td>1.809378</td><td>0.000000</td><td></td></tr> <tr><td>5 B</td><td>1.760644</td><td>2.257442</td><td>1.688809</td><td>1.802314</td><td>0.000000</td></tr> <tr><td>6 B</td><td>3.132245</td><td>2.089422</td><td>3.166431</td><td>1.959053</td><td>3.269442</td></tr> <tr><td>7 B</td><td>3.040583</td><td>1.965974</td><td>3.042632</td><td>1.838409</td><td>1.745776</td></tr> <tr><td>8 Ru</td><td>2.172761</td><td>2.764539</td><td>2.061638</td><td>2.254332</td><td>3.012392</td></tr> <tr><td></td><td>6</td><td>7</td><td>8</td><td></td><td></td></tr> <tr><td>6 B</td><td>0.000000</td><td></td><td></td><td></td><td></td></tr> <tr><td>7 B</td><td>2.899379</td><td>0.000000</td><td></td><td></td><td></td></tr> <tr><td>8 Ru</td><td>1.973232</td><td>3.696469</td><td>0.000000</td><td></td><td></td></tr> </tbody> </table> |          | 1        | 2        | 3        | 4 | 5 | 1 B  | 0.000000 |  |  |  |  | 2 Ru | 2.150843 | 0.000000 |  |  |  | 3 B | 1.815620 | 3.094773 | 0.000000 |  |  | 4 B | 2.574326 | 2.306370 | 1.809378 | 0.000000 |  | 5 B  | 1.760644 | 2.257442 | 1.688809 | 1.802314 | 0.000000 | 6 B | 3.132245 | 2.089422 | 3.166431 | 1.959053 | 3.269442 | 7 B  | 3.040583 | 1.965974 | 3.042632 | 1.838409 | 1.745776 | 8 Ru | 2.172761 | 2.764539 | 2.061638 | 2.254332 | 3.012392 |  | 6 | 7 | 8 |  |  | 6 B | 0.000000 |  |  |  |  | 7 B  | 2.899379 | 0.000000 |  |  |  | 8 Ru | 1.973232 | 3.696469 | 0.000000 |  |  |
|                                                                                                                                              | 1                                                                                                                                                                                                                                                                                                                                                                                                                                                                                                                                                                                                                                                                                                                                                                                                                                                                                                                                                                                                                                                                                                                                                                                                                                                                                | 2        | 3        | 4        | 5        |   |   |      |          |  |  |  |  |      |          |          |  |  |  |     |          |          |          |  |  |     |          |          |          |          |  |      |          |          |          |          |          |     |          |          |          |          |          |      |          |          |          |          |          |      |          |          |          |          |          |  |   |   |   |  |  |     |          |  |  |  |  |      |          |          |  |  |  |      |          |          |          |  |  |
| 1 B                                                                                                                                          | 0.000000                                                                                                                                                                                                                                                                                                                                                                                                                                                                                                                                                                                                                                                                                                                                                                                                                                                                                                                                                                                                                                                                                                                                                                                                                                                                         |          |          |          |          |   |   |      |          |  |  |  |  |      |          |          |  |  |  |     |          |          |          |  |  |     |          |          |          |          |  |      |          |          |          |          |          |     |          |          |          |          |          |      |          |          |          |          |          |      |          |          |          |          |          |  |   |   |   |  |  |     |          |  |  |  |  |      |          |          |  |  |  |      |          |          |          |  |  |
| 2 Ru                                                                                                                                         | 2.150843                                                                                                                                                                                                                                                                                                                                                                                                                                                                                                                                                                                                                                                                                                                                                                                                                                                                                                                                                                                                                                                                                                                                                                                                                                                                         | 0.000000 |          |          |          |   |   |      |          |  |  |  |  |      |          |          |  |  |  |     |          |          |          |  |  |     |          |          |          |          |  |      |          |          |          |          |          |     |          |          |          |          |          |      |          |          |          |          |          |      |          |          |          |          |          |  |   |   |   |  |  |     |          |  |  |  |  |      |          |          |  |  |  |      |          |          |          |  |  |
| 3 B                                                                                                                                          | 1.815620                                                                                                                                                                                                                                                                                                                                                                                                                                                                                                                                                                                                                                                                                                                                                                                                                                                                                                                                                                                                                                                                                                                                                                                                                                                                         | 3.094773 | 0.000000 |          |          |   |   |      |          |  |  |  |  |      |          |          |  |  |  |     |          |          |          |  |  |     |          |          |          |          |  |      |          |          |          |          |          |     |          |          |          |          |          |      |          |          |          |          |          |      |          |          |          |          |          |  |   |   |   |  |  |     |          |  |  |  |  |      |          |          |  |  |  |      |          |          |          |  |  |
| 4 B                                                                                                                                          | 2.574326                                                                                                                                                                                                                                                                                                                                                                                                                                                                                                                                                                                                                                                                                                                                                                                                                                                                                                                                                                                                                                                                                                                                                                                                                                                                         | 2.306370 | 1.809378 | 0.000000 |          |   |   |      |          |  |  |  |  |      |          |          |  |  |  |     |          |          |          |  |  |     |          |          |          |          |  |      |          |          |          |          |          |     |          |          |          |          |          |      |          |          |          |          |          |      |          |          |          |          |          |  |   |   |   |  |  |     |          |  |  |  |  |      |          |          |  |  |  |      |          |          |          |  |  |
| 5 B                                                                                                                                          | 1.760644                                                                                                                                                                                                                                                                                                                                                                                                                                                                                                                                                                                                                                                                                                                                                                                                                                                                                                                                                                                                                                                                                                                                                                                                                                                                         | 2.257442 | 1.688809 | 1.802314 | 0.000000 |   |   |      |          |  |  |  |  |      |          |          |  |  |  |     |          |          |          |  |  |     |          |          |          |          |  |      |          |          |          |          |          |     |          |          |          |          |          |      |          |          |          |          |          |      |          |          |          |          |          |  |   |   |   |  |  |     |          |  |  |  |  |      |          |          |  |  |  |      |          |          |          |  |  |
| 6 B                                                                                                                                          | 3.132245                                                                                                                                                                                                                                                                                                                                                                                                                                                                                                                                                                                                                                                                                                                                                                                                                                                                                                                                                                                                                                                                                                                                                                                                                                                                         | 2.089422 | 3.166431 | 1.959053 | 3.269442 |   |   |      |          |  |  |  |  |      |          |          |  |  |  |     |          |          |          |  |  |     |          |          |          |          |  |      |          |          |          |          |          |     |          |          |          |          |          |      |          |          |          |          |          |      |          |          |          |          |          |  |   |   |   |  |  |     |          |  |  |  |  |      |          |          |  |  |  |      |          |          |          |  |  |
| 7 B                                                                                                                                          | 3.040583                                                                                                                                                                                                                                                                                                                                                                                                                                                                                                                                                                                                                                                                                                                                                                                                                                                                                                                                                                                                                                                                                                                                                                                                                                                                         | 1.965974 | 3.042632 | 1.838409 | 1.745776 |   |   |      |          |  |  |  |  |      |          |          |  |  |  |     |          |          |          |  |  |     |          |          |          |          |  |      |          |          |          |          |          |     |          |          |          |          |          |      |          |          |          |          |          |      |          |          |          |          |          |  |   |   |   |  |  |     |          |  |  |  |  |      |          |          |  |  |  |      |          |          |          |  |  |
| 8 Ru                                                                                                                                         | 2.172761                                                                                                                                                                                                                                                                                                                                                                                                                                                                                                                                                                                                                                                                                                                                                                                                                                                                                                                                                                                                                                                                                                                                                                                                                                                                         | 2.764539 | 2.061638 | 2.254332 | 3.012392 |   |   |      |          |  |  |  |  |      |          |          |  |  |  |     |          |          |          |  |  |     |          |          |          |          |  |      |          |          |          |          |          |     |          |          |          |          |          |      |          |          |          |          |          |      |          |          |          |          |          |  |   |   |   |  |  |     |          |  |  |  |  |      |          |          |  |  |  |      |          |          |          |  |  |
|                                                                                                                                              | 6                                                                                                                                                                                                                                                                                                                                                                                                                                                                                                                                                                                                                                                                                                                                                                                                                                                                                                                                                                                                                                                                                                                                                                                                                                                                                | 7        | 8        |          |          |   |   |      |          |  |  |  |  |      |          |          |  |  |  |     |          |          |          |  |  |     |          |          |          |          |  |      |          |          |          |          |          |     |          |          |          |          |          |      |          |          |          |          |          |      |          |          |          |          |          |  |   |   |   |  |  |     |          |  |  |  |  |      |          |          |  |  |  |      |          |          |          |  |  |
| 6 B                                                                                                                                          | 0.000000                                                                                                                                                                                                                                                                                                                                                                                                                                                                                                                                                                                                                                                                                                                                                                                                                                                                                                                                                                                                                                                                                                                                                                                                                                                                         |          |          |          |          |   |   |      |          |  |  |  |  |      |          |          |  |  |  |     |          |          |          |  |  |     |          |          |          |          |  |      |          |          |          |          |          |     |          |          |          |          |          |      |          |          |          |          |          |      |          |          |          |          |          |  |   |   |   |  |  |     |          |  |  |  |  |      |          |          |  |  |  |      |          |          |          |  |  |
| 7 B                                                                                                                                          | 2.899379                                                                                                                                                                                                                                                                                                                                                                                                                                                                                                                                                                                                                                                                                                                                                                                                                                                                                                                                                                                                                                                                                                                                                                                                                                                                         | 0.000000 |          |          |          |   |   |      |          |  |  |  |  |      |          |          |  |  |  |     |          |          |          |  |  |     |          |          |          |          |  |      |          |          |          |          |          |     |          |          |          |          |          |      |          |          |          |          |          |      |          |          |          |          |          |  |   |   |   |  |  |     |          |  |  |  |  |      |          |          |  |  |  |      |          |          |          |  |  |
| 8 Ru                                                                                                                                         | 1.973232                                                                                                                                                                                                                                                                                                                                                                                                                                                                                                                                                                                                                                                                                                                                                                                                                                                                                                                                                                                                                                                                                                                                                                                                                                                                         | 3.696469 | 0.000000 |          |          |   |   |      |          |  |  |  |  |      |          |          |  |  |  |     |          |          |          |  |  |     |          |          |          |          |  |      |          |          |          |          |          |     |          |          |          |          |          |      |          |          |          |          |          |      |          |          |          |          |          |  |   |   |   |  |  |     |          |  |  |  |  |      |          |          |  |  |  |      |          |          |          |  |  |
|  <p><b>4.</b> -729.73344384 +36.5</p>                     | <table border="1"> <thead> <tr> <th></th> <th>1</th> <th>2</th> <th>3</th> <th>4</th> <th>5</th> </tr> </thead> <tbody> <tr><td>1 B</td><td>0.000000</td><td></td><td></td><td></td><td></td></tr> <tr><td>2 Ru</td><td>2.308986</td><td>0.000000</td><td></td><td></td><td></td></tr> <tr><td>3 B</td><td>1.723967</td><td>3.072766</td><td>0.000000</td><td></td><td></td></tr> <tr><td>4 B</td><td>2.462637</td><td>2.070546</td><td>1.818005</td><td>0.000000</td><td></td></tr> <tr><td>5 Ru</td><td>2.231771</td><td>2.871132</td><td>2.244113</td><td>2.250532</td><td>0.000000</td></tr> <tr><td>6 B</td><td>3.142173</td><td>3.524554</td><td>1.836330</td><td>1.598271</td><td>2.122074</td></tr> <tr><td>7 B</td><td>1.810005</td><td>1.982193</td><td>3.161847</td><td>3.033022</td><td>2.122014</td></tr> <tr><td>8 B</td><td>1.807595</td><td>2.061563</td><td>1.777569</td><td>1.765504</td><td>3.165672</td></tr> <tr><td></td><td>6</td><td>7</td><td>8</td><td></td><td></td></tr> <tr><td>6 B</td><td>0.000000</td><td></td><td></td><td></td><td></td></tr> <tr><td>7 B</td><td>3.837394</td><td>0.000000</td><td></td><td></td><td></td></tr> <tr><td>8 B</td><td>2.945206</td><td>3.042701</td><td>0.000000</td><td></td><td></td></tr> </tbody> </table>  |          | 1        | 2        | 3        | 4 | 5 | 1 B  | 0.000000 |  |  |  |  | 2 Ru | 2.308986 | 0.000000 |  |  |  | 3 B | 1.723967 | 3.072766 | 0.000000 |  |  | 4 B | 2.462637 | 2.070546 | 1.818005 | 0.000000 |  | 5 Ru | 2.231771 | 2.871132 | 2.244113 | 2.250532 | 0.000000 | 6 B | 3.142173 | 3.524554 | 1.836330 | 1.598271 | 2.122074 | 7 B  | 1.810005 | 1.982193 | 3.161847 | 3.033022 | 2.122014 | 8 B  | 1.807595 | 2.061563 | 1.777569 | 1.765504 | 3.165672 |  | 6 | 7 | 8 |  |  | 6 B | 0.000000 |  |  |  |  | 7 B  | 3.837394 | 0.000000 |  |  |  | 8 B  | 2.945206 | 3.042701 | 0.000000 |  |  |
|                                                                                                                                              | 1                                                                                                                                                                                                                                                                                                                                                                                                                                                                                                                                                                                                                                                                                                                                                                                                                                                                                                                                                                                                                                                                                                                                                                                                                                                                                | 2        | 3        | 4        | 5        |   |   |      |          |  |  |  |  |      |          |          |  |  |  |     |          |          |          |  |  |     |          |          |          |          |  |      |          |          |          |          |          |     |          |          |          |          |          |      |          |          |          |          |          |      |          |          |          |          |          |  |   |   |   |  |  |     |          |  |  |  |  |      |          |          |  |  |  |      |          |          |          |  |  |
| 1 B                                                                                                                                          | 0.000000                                                                                                                                                                                                                                                                                                                                                                                                                                                                                                                                                                                                                                                                                                                                                                                                                                                                                                                                                                                                                                                                                                                                                                                                                                                                         |          |          |          |          |   |   |      |          |  |  |  |  |      |          |          |  |  |  |     |          |          |          |  |  |     |          |          |          |          |  |      |          |          |          |          |          |     |          |          |          |          |          |      |          |          |          |          |          |      |          |          |          |          |          |  |   |   |   |  |  |     |          |  |  |  |  |      |          |          |  |  |  |      |          |          |          |  |  |
| 2 Ru                                                                                                                                         | 2.308986                                                                                                                                                                                                                                                                                                                                                                                                                                                                                                                                                                                                                                                                                                                                                                                                                                                                                                                                                                                                                                                                                                                                                                                                                                                                         | 0.000000 |          |          |          |   |   |      |          |  |  |  |  |      |          |          |  |  |  |     |          |          |          |  |  |     |          |          |          |          |  |      |          |          |          |          |          |     |          |          |          |          |          |      |          |          |          |          |          |      |          |          |          |          |          |  |   |   |   |  |  |     |          |  |  |  |  |      |          |          |  |  |  |      |          |          |          |  |  |
| 3 B                                                                                                                                          | 1.723967                                                                                                                                                                                                                                                                                                                                                                                                                                                                                                                                                                                                                                                                                                                                                                                                                                                                                                                                                                                                                                                                                                                                                                                                                                                                         | 3.072766 | 0.000000 |          |          |   |   |      |          |  |  |  |  |      |          |          |  |  |  |     |          |          |          |  |  |     |          |          |          |          |  |      |          |          |          |          |          |     |          |          |          |          |          |      |          |          |          |          |          |      |          |          |          |          |          |  |   |   |   |  |  |     |          |  |  |  |  |      |          |          |  |  |  |      |          |          |          |  |  |
| 4 B                                                                                                                                          | 2.462637                                                                                                                                                                                                                                                                                                                                                                                                                                                                                                                                                                                                                                                                                                                                                                                                                                                                                                                                                                                                                                                                                                                                                                                                                                                                         | 2.070546 | 1.818005 | 0.000000 |          |   |   |      |          |  |  |  |  |      |          |          |  |  |  |     |          |          |          |  |  |     |          |          |          |          |  |      |          |          |          |          |          |     |          |          |          |          |          |      |          |          |          |          |          |      |          |          |          |          |          |  |   |   |   |  |  |     |          |  |  |  |  |      |          |          |  |  |  |      |          |          |          |  |  |
| 5 Ru                                                                                                                                         | 2.231771                                                                                                                                                                                                                                                                                                                                                                                                                                                                                                                                                                                                                                                                                                                                                                                                                                                                                                                                                                                                                                                                                                                                                                                                                                                                         | 2.871132 | 2.244113 | 2.250532 | 0.000000 |   |   |      |          |  |  |  |  |      |          |          |  |  |  |     |          |          |          |  |  |     |          |          |          |          |  |      |          |          |          |          |          |     |          |          |          |          |          |      |          |          |          |          |          |      |          |          |          |          |          |  |   |   |   |  |  |     |          |  |  |  |  |      |          |          |  |  |  |      |          |          |          |  |  |
| 6 B                                                                                                                                          | 3.142173                                                                                                                                                                                                                                                                                                                                                                                                                                                                                                                                                                                                                                                                                                                                                                                                                                                                                                                                                                                                                                                                                                                                                                                                                                                                         | 3.524554 | 1.836330 | 1.598271 | 2.122074 |   |   |      |          |  |  |  |  |      |          |          |  |  |  |     |          |          |          |  |  |     |          |          |          |          |  |      |          |          |          |          |          |     |          |          |          |          |          |      |          |          |          |          |          |      |          |          |          |          |          |  |   |   |   |  |  |     |          |  |  |  |  |      |          |          |  |  |  |      |          |          |          |  |  |
| 7 B                                                                                                                                          | 1.810005                                                                                                                                                                                                                                                                                                                                                                                                                                                                                                                                                                                                                                                                                                                                                                                                                                                                                                                                                                                                                                                                                                                                                                                                                                                                         | 1.982193 | 3.161847 | 3.033022 | 2.122014 |   |   |      |          |  |  |  |  |      |          |          |  |  |  |     |          |          |          |  |  |     |          |          |          |          |  |      |          |          |          |          |          |     |          |          |          |          |          |      |          |          |          |          |          |      |          |          |          |          |          |  |   |   |   |  |  |     |          |  |  |  |  |      |          |          |  |  |  |      |          |          |          |  |  |
| 8 B                                                                                                                                          | 1.807595                                                                                                                                                                                                                                                                                                                                                                                                                                                                                                                                                                                                                                                                                                                                                                                                                                                                                                                                                                                                                                                                                                                                                                                                                                                                         | 2.061563 | 1.777569 | 1.765504 | 3.165672 |   |   |      |          |  |  |  |  |      |          |          |  |  |  |     |          |          |          |  |  |     |          |          |          |          |  |      |          |          |          |          |          |     |          |          |          |          |          |      |          |          |          |          |          |      |          |          |          |          |          |  |   |   |   |  |  |     |          |  |  |  |  |      |          |          |  |  |  |      |          |          |          |  |  |
|                                                                                                                                              | 6                                                                                                                                                                                                                                                                                                                                                                                                                                                                                                                                                                                                                                                                                                                                                                                                                                                                                                                                                                                                                                                                                                                                                                                                                                                                                | 7        | 8        |          |          |   |   |      |          |  |  |  |  |      |          |          |  |  |  |     |          |          |          |  |  |     |          |          |          |          |  |      |          |          |          |          |          |     |          |          |          |          |          |      |          |          |          |          |          |      |          |          |          |          |          |  |   |   |   |  |  |     |          |  |  |  |  |      |          |          |  |  |  |      |          |          |          |  |  |
| 6 B                                                                                                                                          | 0.000000                                                                                                                                                                                                                                                                                                                                                                                                                                                                                                                                                                                                                                                                                                                                                                                                                                                                                                                                                                                                                                                                                                                                                                                                                                                                         |          |          |          |          |   |   |      |          |  |  |  |  |      |          |          |  |  |  |     |          |          |          |  |  |     |          |          |          |          |  |      |          |          |          |          |          |     |          |          |          |          |          |      |          |          |          |          |          |      |          |          |          |          |          |  |   |   |   |  |  |     |          |  |  |  |  |      |          |          |  |  |  |      |          |          |          |  |  |
| 7 B                                                                                                                                          | 3.837394                                                                                                                                                                                                                                                                                                                                                                                                                                                                                                                                                                                                                                                                                                                                                                                                                                                                                                                                                                                                                                                                                                                                                                                                                                                                         | 0.000000 |          |          |          |   |   |      |          |  |  |  |  |      |          |          |  |  |  |     |          |          |          |  |  |     |          |          |          |          |  |      |          |          |          |          |          |     |          |          |          |          |          |      |          |          |          |          |          |      |          |          |          |          |          |  |   |   |   |  |  |     |          |  |  |  |  |      |          |          |  |  |  |      |          |          |          |  |  |
| 8 B                                                                                                                                          | 2.945206                                                                                                                                                                                                                                                                                                                                                                                                                                                                                                                                                                                                                                                                                                                                                                                                                                                                                                                                                                                                                                                                                                                                                                                                                                                                         | 3.042701 | 0.000000 |          |          |   |   |      |          |  |  |  |  |      |          |          |  |  |  |     |          |          |          |  |  |     |          |          |          |          |  |      |          |          |          |          |          |     |          |          |          |          |          |      |          |          |          |          |          |      |          |          |          |          |          |  |   |   |   |  |  |     |          |  |  |  |  |      |          |          |  |  |  |      |          |          |          |  |  |

| 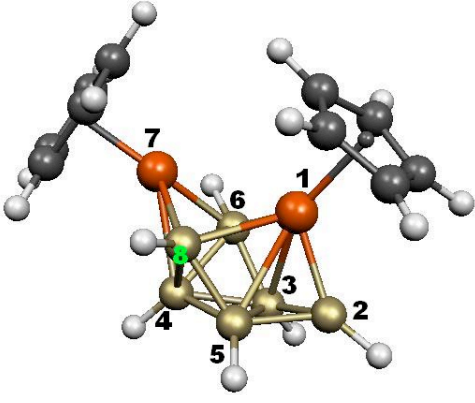 <p>5. -729.72783064 +40.0 C<sub>s</sub></p>   | <table border="1"> <thead> <tr> <th></th> <th>1</th> <th>2</th> <th>3</th> <th>4</th> <th>5</th> </tr> </thead> <tbody> <tr><td>1 Ru</td><td>0.000000</td><td></td><td></td><td></td><td></td></tr> <tr><td>2 B</td><td>1.971497</td><td>0.000000</td><td></td><td></td><td></td></tr> <tr><td>3 B</td><td>2.362940</td><td>1.769127</td><td>0.000000</td><td></td><td></td></tr> <tr><td>4 B</td><td>2.958356</td><td>3.061054</td><td>1.821218</td><td>0.000000</td><td></td></tr> <tr><td>5 B</td><td>2.327935</td><td>1.753650</td><td>1.732862</td><td>1.740020</td><td>0.000000</td></tr> <tr><td>6 B</td><td>2.140161</td><td>2.919740</td><td>1.674045</td><td>1.786946</td><td>2.568450</td></tr> <tr><td>7 Ru</td><td>2.983019</td><td>4.329747</td><td>3.376573</td><td>2.367928</td><td>3.431192</td></tr> <tr><td>8 B</td><td>2.199198</td><td>3.005542</td><td>2.748583</td><td>1.834327</td><td>1.738657</td></tr> <tr><td></td><td>6</td><td>7</td><td>8</td><td></td><td></td></tr> <tr><td>6 B</td><td>0.000000</td><td></td><td></td><td></td><td></td></tr> <tr><td>7 Ru</td><td>1.934304</td><td>0.000000</td><td></td><td></td><td></td></tr> <tr><td>8 B</td><td>2.402616</td><td>2.169320</td><td>0.000000</td><td></td><td></td></tr> </tbody> </table> |          | 1        | 2        | 3        | 4 | 5 | 1 Ru | 0.000000 |  |  |  |  | 2 B  | 1.971497 | 0.000000 |  |  |  | 3 B  | 2.362940 | 1.769127 | 0.000000 |  |  | 4 B | 2.958356 | 3.061054 | 1.821218 | 0.000000 |  | 5 B | 2.327935 | 1.753650 | 1.732862 | 1.740020 | 0.000000 | 6 B | 2.140161 | 2.919740 | 1.674045 | 1.786946 | 2.568450 | 7 Ru | 2.983019 | 4.329747 | 3.376573 | 2.367928 | 3.431192 | 8 B | 2.199198 | 3.005542 | 2.748583 | 1.834327 | 1.738657 |  | 6 | 7 | 8 |  |  | 6 B | 0.000000 |  |  |  |  | 7 Ru | 1.934304 | 0.000000 |  |  |  | 8 B | 2.402616 | 2.169320 | 0.000000 |  |  |
|---------------------------------------------------------------------------------------------------------------------------------|----------------------------------------------------------------------------------------------------------------------------------------------------------------------------------------------------------------------------------------------------------------------------------------------------------------------------------------------------------------------------------------------------------------------------------------------------------------------------------------------------------------------------------------------------------------------------------------------------------------------------------------------------------------------------------------------------------------------------------------------------------------------------------------------------------------------------------------------------------------------------------------------------------------------------------------------------------------------------------------------------------------------------------------------------------------------------------------------------------------------------------------------------------------------------------------------------------------------------------------------------------------------------------|----------|----------|----------|----------|---|---|------|----------|--|--|--|--|------|----------|----------|--|--|--|------|----------|----------|----------|--|--|-----|----------|----------|----------|----------|--|-----|----------|----------|----------|----------|----------|-----|----------|----------|----------|----------|----------|------|----------|----------|----------|----------|----------|-----|----------|----------|----------|----------|----------|--|---|---|---|--|--|-----|----------|--|--|--|--|------|----------|----------|--|--|--|-----|----------|----------|----------|--|--|
|                                                                                                                                 | 1                                                                                                                                                                                                                                                                                                                                                                                                                                                                                                                                                                                                                                                                                                                                                                                                                                                                                                                                                                                                                                                                                                                                                                                                                                                                                | 2        | 3        | 4        | 5        |   |   |      |          |  |  |  |  |      |          |          |  |  |  |      |          |          |          |  |  |     |          |          |          |          |  |     |          |          |          |          |          |     |          |          |          |          |          |      |          |          |          |          |          |     |          |          |          |          |          |  |   |   |   |  |  |     |          |  |  |  |  |      |          |          |  |  |  |     |          |          |          |  |  |
| 1 Ru                                                                                                                            | 0.000000                                                                                                                                                                                                                                                                                                                                                                                                                                                                                                                                                                                                                                                                                                                                                                                                                                                                                                                                                                                                                                                                                                                                                                                                                                                                         |          |          |          |          |   |   |      |          |  |  |  |  |      |          |          |  |  |  |      |          |          |          |  |  |     |          |          |          |          |  |     |          |          |          |          |          |     |          |          |          |          |          |      |          |          |          |          |          |     |          |          |          |          |          |  |   |   |   |  |  |     |          |  |  |  |  |      |          |          |  |  |  |     |          |          |          |  |  |
| 2 B                                                                                                                             | 1.971497                                                                                                                                                                                                                                                                                                                                                                                                                                                                                                                                                                                                                                                                                                                                                                                                                                                                                                                                                                                                                                                                                                                                                                                                                                                                         | 0.000000 |          |          |          |   |   |      |          |  |  |  |  |      |          |          |  |  |  |      |          |          |          |  |  |     |          |          |          |          |  |     |          |          |          |          |          |     |          |          |          |          |          |      |          |          |          |          |          |     |          |          |          |          |          |  |   |   |   |  |  |     |          |  |  |  |  |      |          |          |  |  |  |     |          |          |          |  |  |
| 3 B                                                                                                                             | 2.362940                                                                                                                                                                                                                                                                                                                                                                                                                                                                                                                                                                                                                                                                                                                                                                                                                                                                                                                                                                                                                                                                                                                                                                                                                                                                         | 1.769127 | 0.000000 |          |          |   |   |      |          |  |  |  |  |      |          |          |  |  |  |      |          |          |          |  |  |     |          |          |          |          |  |     |          |          |          |          |          |     |          |          |          |          |          |      |          |          |          |          |          |     |          |          |          |          |          |  |   |   |   |  |  |     |          |  |  |  |  |      |          |          |  |  |  |     |          |          |          |  |  |
| 4 B                                                                                                                             | 2.958356                                                                                                                                                                                                                                                                                                                                                                                                                                                                                                                                                                                                                                                                                                                                                                                                                                                                                                                                                                                                                                                                                                                                                                                                                                                                         | 3.061054 | 1.821218 | 0.000000 |          |   |   |      |          |  |  |  |  |      |          |          |  |  |  |      |          |          |          |  |  |     |          |          |          |          |  |     |          |          |          |          |          |     |          |          |          |          |          |      |          |          |          |          |          |     |          |          |          |          |          |  |   |   |   |  |  |     |          |  |  |  |  |      |          |          |  |  |  |     |          |          |          |  |  |
| 5 B                                                                                                                             | 2.327935                                                                                                                                                                                                                                                                                                                                                                                                                                                                                                                                                                                                                                                                                                                                                                                                                                                                                                                                                                                                                                                                                                                                                                                                                                                                         | 1.753650 | 1.732862 | 1.740020 | 0.000000 |   |   |      |          |  |  |  |  |      |          |          |  |  |  |      |          |          |          |  |  |     |          |          |          |          |  |     |          |          |          |          |          |     |          |          |          |          |          |      |          |          |          |          |          |     |          |          |          |          |          |  |   |   |   |  |  |     |          |  |  |  |  |      |          |          |  |  |  |     |          |          |          |  |  |
| 6 B                                                                                                                             | 2.140161                                                                                                                                                                                                                                                                                                                                                                                                                                                                                                                                                                                                                                                                                                                                                                                                                                                                                                                                                                                                                                                                                                                                                                                                                                                                         | 2.919740 | 1.674045 | 1.786946 | 2.568450 |   |   |      |          |  |  |  |  |      |          |          |  |  |  |      |          |          |          |  |  |     |          |          |          |          |  |     |          |          |          |          |          |     |          |          |          |          |          |      |          |          |          |          |          |     |          |          |          |          |          |  |   |   |   |  |  |     |          |  |  |  |  |      |          |          |  |  |  |     |          |          |          |  |  |
| 7 Ru                                                                                                                            | 2.983019                                                                                                                                                                                                                                                                                                                                                                                                                                                                                                                                                                                                                                                                                                                                                                                                                                                                                                                                                                                                                                                                                                                                                                                                                                                                         | 4.329747 | 3.376573 | 2.367928 | 3.431192 |   |   |      |          |  |  |  |  |      |          |          |  |  |  |      |          |          |          |  |  |     |          |          |          |          |  |     |          |          |          |          |          |     |          |          |          |          |          |      |          |          |          |          |          |     |          |          |          |          |          |  |   |   |   |  |  |     |          |  |  |  |  |      |          |          |  |  |  |     |          |          |          |  |  |
| 8 B                                                                                                                             | 2.199198                                                                                                                                                                                                                                                                                                                                                                                                                                                                                                                                                                                                                                                                                                                                                                                                                                                                                                                                                                                                                                                                                                                                                                                                                                                                         | 3.005542 | 2.748583 | 1.834327 | 1.738657 |   |   |      |          |  |  |  |  |      |          |          |  |  |  |      |          |          |          |  |  |     |          |          |          |          |  |     |          |          |          |          |          |     |          |          |          |          |          |      |          |          |          |          |          |     |          |          |          |          |          |  |   |   |   |  |  |     |          |  |  |  |  |      |          |          |  |  |  |     |          |          |          |  |  |
|                                                                                                                                 | 6                                                                                                                                                                                                                                                                                                                                                                                                                                                                                                                                                                                                                                                                                                                                                                                                                                                                                                                                                                                                                                                                                                                                                                                                                                                                                | 7        | 8        |          |          |   |   |      |          |  |  |  |  |      |          |          |  |  |  |      |          |          |          |  |  |     |          |          |          |          |  |     |          |          |          |          |          |     |          |          |          |          |          |      |          |          |          |          |          |     |          |          |          |          |          |  |   |   |   |  |  |     |          |  |  |  |  |      |          |          |  |  |  |     |          |          |          |  |  |
| 6 B                                                                                                                             | 0.000000                                                                                                                                                                                                                                                                                                                                                                                                                                                                                                                                                                                                                                                                                                                                                                                                                                                                                                                                                                                                                                                                                                                                                                                                                                                                         |          |          |          |          |   |   |      |          |  |  |  |  |      |          |          |  |  |  |      |          |          |          |  |  |     |          |          |          |          |  |     |          |          |          |          |          |     |          |          |          |          |          |      |          |          |          |          |          |     |          |          |          |          |          |  |   |   |   |  |  |     |          |  |  |  |  |      |          |          |  |  |  |     |          |          |          |  |  |
| 7 Ru                                                                                                                            | 1.934304                                                                                                                                                                                                                                                                                                                                                                                                                                                                                                                                                                                                                                                                                                                                                                                                                                                                                                                                                                                                                                                                                                                                                                                                                                                                         | 0.000000 |          |          |          |   |   |      |          |  |  |  |  |      |          |          |  |  |  |      |          |          |          |  |  |     |          |          |          |          |  |     |          |          |          |          |          |     |          |          |          |          |          |      |          |          |          |          |          |     |          |          |          |          |          |  |   |   |   |  |  |     |          |  |  |  |  |      |          |          |  |  |  |     |          |          |          |  |  |
| 8 B                                                                                                                             | 2.402616                                                                                                                                                                                                                                                                                                                                                                                                                                                                                                                                                                                                                                                                                                                                                                                                                                                                                                                                                                                                                                                                                                                                                                                                                                                                         | 2.169320 | 0.000000 |          |          |   |   |      |          |  |  |  |  |      |          |          |  |  |  |      |          |          |          |  |  |     |          |          |          |          |  |     |          |          |          |          |          |     |          |          |          |          |          |      |          |          |          |          |          |     |          |          |          |          |          |  |   |   |   |  |  |     |          |  |  |  |  |      |          |          |  |  |  |     |          |          |          |  |  |
|  <p>6. -729.72405327 +42.4</p>                 | <table border="1"> <thead> <tr> <th></th> <th>1</th> <th>2</th> <th>3</th> <th>4</th> <th>5</th> </tr> </thead> <tbody> <tr><td>1 B</td><td>0.000000</td><td></td><td></td><td></td><td></td></tr> <tr><td>2 B</td><td>1.764121</td><td>0.000000</td><td></td><td></td><td></td></tr> <tr><td>3 Ru</td><td>2.198786</td><td>2.387025</td><td>0.000000</td><td></td><td></td></tr> <tr><td>4 B</td><td>3.073175</td><td>1.806875</td><td>2.282338</td><td>0.000000</td><td></td></tr> <tr><td>5 B</td><td>1.742886</td><td>2.538951</td><td>2.508575</td><td>3.011766</td><td>0.000000</td></tr> <tr><td>6 B</td><td>1.697046</td><td>1.775703</td><td>3.302513</td><td>2.999540</td><td>1.760948</td></tr> <tr><td>7 Ru</td><td>3.184188</td><td>2.368675</td><td>3.481876</td><td>2.075615</td><td>2.369475</td></tr> <tr><td>8 B</td><td>2.732891</td><td>2.517597</td><td>1.968437</td><td>1.774420</td><td>1.790160</td></tr> <tr><td></td><td>6</td><td>7</td><td>8</td><td></td><td></td></tr> <tr><td>6 B</td><td>0.000000</td><td></td><td></td><td></td><td></td></tr> <tr><td>7 Ru</td><td>2.098253</td><td>0.000000</td><td></td><td></td><td></td></tr> <tr><td>8 B</td><td>2.765426</td><td>1.949340</td><td>0.000000</td><td></td><td></td></tr> </tbody> </table> |          | 1        | 2        | 3        | 4 | 5 | 1 B  | 0.000000 |  |  |  |  | 2 B  | 1.764121 | 0.000000 |  |  |  | 3 Ru | 2.198786 | 2.387025 | 0.000000 |  |  | 4 B | 3.073175 | 1.806875 | 2.282338 | 0.000000 |  | 5 B | 1.742886 | 2.538951 | 2.508575 | 3.011766 | 0.000000 | 6 B | 1.697046 | 1.775703 | 3.302513 | 2.999540 | 1.760948 | 7 Ru | 3.184188 | 2.368675 | 3.481876 | 2.075615 | 2.369475 | 8 B | 2.732891 | 2.517597 | 1.968437 | 1.774420 | 1.790160 |  | 6 | 7 | 8 |  |  | 6 B | 0.000000 |  |  |  |  | 7 Ru | 2.098253 | 0.000000 |  |  |  | 8 B | 2.765426 | 1.949340 | 0.000000 |  |  |
|                                                                                                                                 | 1                                                                                                                                                                                                                                                                                                                                                                                                                                                                                                                                                                                                                                                                                                                                                                                                                                                                                                                                                                                                                                                                                                                                                                                                                                                                                | 2        | 3        | 4        | 5        |   |   |      |          |  |  |  |  |      |          |          |  |  |  |      |          |          |          |  |  |     |          |          |          |          |  |     |          |          |          |          |          |     |          |          |          |          |          |      |          |          |          |          |          |     |          |          |          |          |          |  |   |   |   |  |  |     |          |  |  |  |  |      |          |          |  |  |  |     |          |          |          |  |  |
| 1 B                                                                                                                             | 0.000000                                                                                                                                                                                                                                                                                                                                                                                                                                                                                                                                                                                                                                                                                                                                                                                                                                                                                                                                                                                                                                                                                                                                                                                                                                                                         |          |          |          |          |   |   |      |          |  |  |  |  |      |          |          |  |  |  |      |          |          |          |  |  |     |          |          |          |          |  |     |          |          |          |          |          |     |          |          |          |          |          |      |          |          |          |          |          |     |          |          |          |          |          |  |   |   |   |  |  |     |          |  |  |  |  |      |          |          |  |  |  |     |          |          |          |  |  |
| 2 B                                                                                                                             | 1.764121                                                                                                                                                                                                                                                                                                                                                                                                                                                                                                                                                                                                                                                                                                                                                                                                                                                                                                                                                                                                                                                                                                                                                                                                                                                                         | 0.000000 |          |          |          |   |   |      |          |  |  |  |  |      |          |          |  |  |  |      |          |          |          |  |  |     |          |          |          |          |  |     |          |          |          |          |          |     |          |          |          |          |          |      |          |          |          |          |          |     |          |          |          |          |          |  |   |   |   |  |  |     |          |  |  |  |  |      |          |          |  |  |  |     |          |          |          |  |  |
| 3 Ru                                                                                                                            | 2.198786                                                                                                                                                                                                                                                                                                                                                                                                                                                                                                                                                                                                                                                                                                                                                                                                                                                                                                                                                                                                                                                                                                                                                                                                                                                                         | 2.387025 | 0.000000 |          |          |   |   |      |          |  |  |  |  |      |          |          |  |  |  |      |          |          |          |  |  |     |          |          |          |          |  |     |          |          |          |          |          |     |          |          |          |          |          |      |          |          |          |          |          |     |          |          |          |          |          |  |   |   |   |  |  |     |          |  |  |  |  |      |          |          |  |  |  |     |          |          |          |  |  |
| 4 B                                                                                                                             | 3.073175                                                                                                                                                                                                                                                                                                                                                                                                                                                                                                                                                                                                                                                                                                                                                                                                                                                                                                                                                                                                                                                                                                                                                                                                                                                                         | 1.806875 | 2.282338 | 0.000000 |          |   |   |      |          |  |  |  |  |      |          |          |  |  |  |      |          |          |          |  |  |     |          |          |          |          |  |     |          |          |          |          |          |     |          |          |          |          |          |      |          |          |          |          |          |     |          |          |          |          |          |  |   |   |   |  |  |     |          |  |  |  |  |      |          |          |  |  |  |     |          |          |          |  |  |
| 5 B                                                                                                                             | 1.742886                                                                                                                                                                                                                                                                                                                                                                                                                                                                                                                                                                                                                                                                                                                                                                                                                                                                                                                                                                                                                                                                                                                                                                                                                                                                         | 2.538951 | 2.508575 | 3.011766 | 0.000000 |   |   |      |          |  |  |  |  |      |          |          |  |  |  |      |          |          |          |  |  |     |          |          |          |          |  |     |          |          |          |          |          |     |          |          |          |          |          |      |          |          |          |          |          |     |          |          |          |          |          |  |   |   |   |  |  |     |          |  |  |  |  |      |          |          |  |  |  |     |          |          |          |  |  |
| 6 B                                                                                                                             | 1.697046                                                                                                                                                                                                                                                                                                                                                                                                                                                                                                                                                                                                                                                                                                                                                                                                                                                                                                                                                                                                                                                                                                                                                                                                                                                                         | 1.775703 | 3.302513 | 2.999540 | 1.760948 |   |   |      |          |  |  |  |  |      |          |          |  |  |  |      |          |          |          |  |  |     |          |          |          |          |  |     |          |          |          |          |          |     |          |          |          |          |          |      |          |          |          |          |          |     |          |          |          |          |          |  |   |   |   |  |  |     |          |  |  |  |  |      |          |          |  |  |  |     |          |          |          |  |  |
| 7 Ru                                                                                                                            | 3.184188                                                                                                                                                                                                                                                                                                                                                                                                                                                                                                                                                                                                                                                                                                                                                                                                                                                                                                                                                                                                                                                                                                                                                                                                                                                                         | 2.368675 | 3.481876 | 2.075615 | 2.369475 |   |   |      |          |  |  |  |  |      |          |          |  |  |  |      |          |          |          |  |  |     |          |          |          |          |  |     |          |          |          |          |          |     |          |          |          |          |          |      |          |          |          |          |          |     |          |          |          |          |          |  |   |   |   |  |  |     |          |  |  |  |  |      |          |          |  |  |  |     |          |          |          |  |  |
| 8 B                                                                                                                             | 2.732891                                                                                                                                                                                                                                                                                                                                                                                                                                                                                                                                                                                                                                                                                                                                                                                                                                                                                                                                                                                                                                                                                                                                                                                                                                                                         | 2.517597 | 1.968437 | 1.774420 | 1.790160 |   |   |      |          |  |  |  |  |      |          |          |  |  |  |      |          |          |          |  |  |     |          |          |          |          |  |     |          |          |          |          |          |     |          |          |          |          |          |      |          |          |          |          |          |     |          |          |          |          |          |  |   |   |   |  |  |     |          |  |  |  |  |      |          |          |  |  |  |     |          |          |          |  |  |
|                                                                                                                                 | 6                                                                                                                                                                                                                                                                                                                                                                                                                                                                                                                                                                                                                                                                                                                                                                                                                                                                                                                                                                                                                                                                                                                                                                                                                                                                                | 7        | 8        |          |          |   |   |      |          |  |  |  |  |      |          |          |  |  |  |      |          |          |          |  |  |     |          |          |          |          |  |     |          |          |          |          |          |     |          |          |          |          |          |      |          |          |          |          |          |     |          |          |          |          |          |  |   |   |   |  |  |     |          |  |  |  |  |      |          |          |  |  |  |     |          |          |          |  |  |
| 6 B                                                                                                                             | 0.000000                                                                                                                                                                                                                                                                                                                                                                                                                                                                                                                                                                                                                                                                                                                                                                                                                                                                                                                                                                                                                                                                                                                                                                                                                                                                         |          |          |          |          |   |   |      |          |  |  |  |  |      |          |          |  |  |  |      |          |          |          |  |  |     |          |          |          |          |  |     |          |          |          |          |          |     |          |          |          |          |          |      |          |          |          |          |          |     |          |          |          |          |          |  |   |   |   |  |  |     |          |  |  |  |  |      |          |          |  |  |  |     |          |          |          |  |  |
| 7 Ru                                                                                                                            | 2.098253                                                                                                                                                                                                                                                                                                                                                                                                                                                                                                                                                                                                                                                                                                                                                                                                                                                                                                                                                                                                                                                                                                                                                                                                                                                                         | 0.000000 |          |          |          |   |   |      |          |  |  |  |  |      |          |          |  |  |  |      |          |          |          |  |  |     |          |          |          |          |  |     |          |          |          |          |          |     |          |          |          |          |          |      |          |          |          |          |          |     |          |          |          |          |          |  |   |   |   |  |  |     |          |  |  |  |  |      |          |          |  |  |  |     |          |          |          |  |  |
| 8 B                                                                                                                             | 2.765426                                                                                                                                                                                                                                                                                                                                                                                                                                                                                                                                                                                                                                                                                                                                                                                                                                                                                                                                                                                                                                                                                                                                                                                                                                                                         | 1.949340 | 0.000000 |          |          |   |   |      |          |  |  |  |  |      |          |          |  |  |  |      |          |          |          |  |  |     |          |          |          |          |  |     |          |          |          |          |          |     |          |          |          |          |          |      |          |          |          |          |          |     |          |          |          |          |          |  |   |   |   |  |  |     |          |  |  |  |  |      |          |          |  |  |  |     |          |          |          |  |  |
|  <p>7. -729.72313835 +43.0 C<sub>2</sub></p> | <table border="1"> <thead> <tr> <th></th> <th>1</th> <th>2</th> <th>3</th> <th>4</th> <th>5</th> </tr> </thead> <tbody> <tr><td>1 Ru</td><td>0.000000</td><td></td><td></td><td></td><td></td></tr> <tr><td>2 Ru</td><td>2.561854</td><td>0.000000</td><td></td><td></td><td></td></tr> <tr><td>3 B</td><td>2.249421</td><td>3.067095</td><td>0.000000</td><td></td><td></td></tr> <tr><td>4 B</td><td>3.067095</td><td>2.249421</td><td>1.697688</td><td>0.000000</td><td></td></tr> <tr><td>5 B</td><td>2.202982</td><td>2.328316</td><td>1.743105</td><td>1.810905</td><td>0.000000</td></tr> <tr><td>6 B</td><td>2.328316</td><td>2.202982</td><td>1.810905</td><td>1.743105</td><td>2.601432</td></tr> <tr><td>7 B</td><td>3.546217</td><td>1.917089</td><td>3.035608</td><td>1.784311</td><td>1.847996</td></tr> <tr><td>8 B</td><td>1.917089</td><td>3.546217</td><td>1.784311</td><td>3.035608</td><td>3.064714</td></tr> <tr><td></td><td>6</td><td>7</td><td>8</td><td></td><td></td></tr> <tr><td>6 B</td><td>0.000000</td><td></td><td></td><td></td><td></td></tr> <tr><td>7 B</td><td>3.064714</td><td>0.000000</td><td></td><td></td><td></td></tr> <tr><td>8 B</td><td>1.847996</td><td>4.341326</td><td>0.000000</td><td></td><td></td></tr> </tbody> </table>  |          | 1        | 2        | 3        | 4 | 5 | 1 Ru | 0.000000 |  |  |  |  | 2 Ru | 2.561854 | 0.000000 |  |  |  | 3 B  | 2.249421 | 3.067095 | 0.000000 |  |  | 4 B | 3.067095 | 2.249421 | 1.697688 | 0.000000 |  | 5 B | 2.202982 | 2.328316 | 1.743105 | 1.810905 | 0.000000 | 6 B | 2.328316 | 2.202982 | 1.810905 | 1.743105 | 2.601432 | 7 B  | 3.546217 | 1.917089 | 3.035608 | 1.784311 | 1.847996 | 8 B | 1.917089 | 3.546217 | 1.784311 | 3.035608 | 3.064714 |  | 6 | 7 | 8 |  |  | 6 B | 0.000000 |  |  |  |  | 7 B  | 3.064714 | 0.000000 |  |  |  | 8 B | 1.847996 | 4.341326 | 0.000000 |  |  |
|                                                                                                                                 | 1                                                                                                                                                                                                                                                                                                                                                                                                                                                                                                                                                                                                                                                                                                                                                                                                                                                                                                                                                                                                                                                                                                                                                                                                                                                                                | 2        | 3        | 4        | 5        |   |   |      |          |  |  |  |  |      |          |          |  |  |  |      |          |          |          |  |  |     |          |          |          |          |  |     |          |          |          |          |          |     |          |          |          |          |          |      |          |          |          |          |          |     |          |          |          |          |          |  |   |   |   |  |  |     |          |  |  |  |  |      |          |          |  |  |  |     |          |          |          |  |  |
| 1 Ru                                                                                                                            | 0.000000                                                                                                                                                                                                                                                                                                                                                                                                                                                                                                                                                                                                                                                                                                                                                                                                                                                                                                                                                                                                                                                                                                                                                                                                                                                                         |          |          |          |          |   |   |      |          |  |  |  |  |      |          |          |  |  |  |      |          |          |          |  |  |     |          |          |          |          |  |     |          |          |          |          |          |     |          |          |          |          |          |      |          |          |          |          |          |     |          |          |          |          |          |  |   |   |   |  |  |     |          |  |  |  |  |      |          |          |  |  |  |     |          |          |          |  |  |
| 2 Ru                                                                                                                            | 2.561854                                                                                                                                                                                                                                                                                                                                                                                                                                                                                                                                                                                                                                                                                                                                                                                                                                                                                                                                                                                                                                                                                                                                                                                                                                                                         | 0.000000 |          |          |          |   |   |      |          |  |  |  |  |      |          |          |  |  |  |      |          |          |          |  |  |     |          |          |          |          |  |     |          |          |          |          |          |     |          |          |          |          |          |      |          |          |          |          |          |     |          |          |          |          |          |  |   |   |   |  |  |     |          |  |  |  |  |      |          |          |  |  |  |     |          |          |          |  |  |
| 3 B                                                                                                                             | 2.249421                                                                                                                                                                                                                                                                                                                                                                                                                                                                                                                                                                                                                                                                                                                                                                                                                                                                                                                                                                                                                                                                                                                                                                                                                                                                         | 3.067095 | 0.000000 |          |          |   |   |      |          |  |  |  |  |      |          |          |  |  |  |      |          |          |          |  |  |     |          |          |          |          |  |     |          |          |          |          |          |     |          |          |          |          |          |      |          |          |          |          |          |     |          |          |          |          |          |  |   |   |   |  |  |     |          |  |  |  |  |      |          |          |  |  |  |     |          |          |          |  |  |
| 4 B                                                                                                                             | 3.067095                                                                                                                                                                                                                                                                                                                                                                                                                                                                                                                                                                                                                                                                                                                                                                                                                                                                                                                                                                                                                                                                                                                                                                                                                                                                         | 2.249421 | 1.697688 | 0.000000 |          |   |   |      |          |  |  |  |  |      |          |          |  |  |  |      |          |          |          |  |  |     |          |          |          |          |  |     |          |          |          |          |          |     |          |          |          |          |          |      |          |          |          |          |          |     |          |          |          |          |          |  |   |   |   |  |  |     |          |  |  |  |  |      |          |          |  |  |  |     |          |          |          |  |  |
| 5 B                                                                                                                             | 2.202982                                                                                                                                                                                                                                                                                                                                                                                                                                                                                                                                                                                                                                                                                                                                                                                                                                                                                                                                                                                                                                                                                                                                                                                                                                                                         | 2.328316 | 1.743105 | 1.810905 | 0.000000 |   |   |      |          |  |  |  |  |      |          |          |  |  |  |      |          |          |          |  |  |     |          |          |          |          |  |     |          |          |          |          |          |     |          |          |          |          |          |      |          |          |          |          |          |     |          |          |          |          |          |  |   |   |   |  |  |     |          |  |  |  |  |      |          |          |  |  |  |     |          |          |          |  |  |
| 6 B                                                                                                                             | 2.328316                                                                                                                                                                                                                                                                                                                                                                                                                                                                                                                                                                                                                                                                                                                                                                                                                                                                                                                                                                                                                                                                                                                                                                                                                                                                         | 2.202982 | 1.810905 | 1.743105 | 2.601432 |   |   |      |          |  |  |  |  |      |          |          |  |  |  |      |          |          |          |  |  |     |          |          |          |          |  |     |          |          |          |          |          |     |          |          |          |          |          |      |          |          |          |          |          |     |          |          |          |          |          |  |   |   |   |  |  |     |          |  |  |  |  |      |          |          |  |  |  |     |          |          |          |  |  |
| 7 B                                                                                                                             | 3.546217                                                                                                                                                                                                                                                                                                                                                                                                                                                                                                                                                                                                                                                                                                                                                                                                                                                                                                                                                                                                                                                                                                                                                                                                                                                                         | 1.917089 | 3.035608 | 1.784311 | 1.847996 |   |   |      |          |  |  |  |  |      |          |          |  |  |  |      |          |          |          |  |  |     |          |          |          |          |  |     |          |          |          |          |          |     |          |          |          |          |          |      |          |          |          |          |          |     |          |          |          |          |          |  |   |   |   |  |  |     |          |  |  |  |  |      |          |          |  |  |  |     |          |          |          |  |  |
| 8 B                                                                                                                             | 1.917089                                                                                                                                                                                                                                                                                                                                                                                                                                                                                                                                                                                                                                                                                                                                                                                                                                                                                                                                                                                                                                                                                                                                                                                                                                                                         | 3.546217 | 1.784311 | 3.035608 | 3.064714 |   |   |      |          |  |  |  |  |      |          |          |  |  |  |      |          |          |          |  |  |     |          |          |          |          |  |     |          |          |          |          |          |     |          |          |          |          |          |      |          |          |          |          |          |     |          |          |          |          |          |  |   |   |   |  |  |     |          |  |  |  |  |      |          |          |  |  |  |     |          |          |          |  |  |
|                                                                                                                                 | 6                                                                                                                                                                                                                                                                                                                                                                                                                                                                                                                                                                                                                                                                                                                                                                                                                                                                                                                                                                                                                                                                                                                                                                                                                                                                                | 7        | 8        |          |          |   |   |      |          |  |  |  |  |      |          |          |  |  |  |      |          |          |          |  |  |     |          |          |          |          |  |     |          |          |          |          |          |     |          |          |          |          |          |      |          |          |          |          |          |     |          |          |          |          |          |  |   |   |   |  |  |     |          |  |  |  |  |      |          |          |  |  |  |     |          |          |          |  |  |
| 6 B                                                                                                                             | 0.000000                                                                                                                                                                                                                                                                                                                                                                                                                                                                                                                                                                                                                                                                                                                                                                                                                                                                                                                                                                                                                                                                                                                                                                                                                                                                         |          |          |          |          |   |   |      |          |  |  |  |  |      |          |          |  |  |  |      |          |          |          |  |  |     |          |          |          |          |  |     |          |          |          |          |          |     |          |          |          |          |          |      |          |          |          |          |          |     |          |          |          |          |          |  |   |   |   |  |  |     |          |  |  |  |  |      |          |          |  |  |  |     |          |          |          |  |  |
| 7 B                                                                                                                             | 3.064714                                                                                                                                                                                                                                                                                                                                                                                                                                                                                                                                                                                                                                                                                                                                                                                                                                                                                                                                                                                                                                                                                                                                                                                                                                                                         | 0.000000 |          |          |          |   |   |      |          |  |  |  |  |      |          |          |  |  |  |      |          |          |          |  |  |     |          |          |          |          |  |     |          |          |          |          |          |     |          |          |          |          |          |      |          |          |          |          |          |     |          |          |          |          |          |  |   |   |   |  |  |     |          |  |  |  |  |      |          |          |  |  |  |     |          |          |          |  |  |
| 8 B                                                                                                                             | 1.847996                                                                                                                                                                                                                                                                                                                                                                                                                                                                                                                                                                                                                                                                                                                                                                                                                                                                                                                                                                                                                                                                                                                                                                                                                                                                         | 4.341326 | 0.000000 |          |          |   |   |      |          |  |  |  |  |      |          |          |  |  |  |      |          |          |          |  |  |     |          |          |          |          |  |     |          |          |          |          |          |     |          |          |          |          |          |      |          |          |          |          |          |     |          |          |          |          |          |  |   |   |   |  |  |     |          |  |  |  |  |      |          |          |  |  |  |     |          |          |          |  |  |

Table S1C: Energy ranking for the  $\text{Cp}_2\text{Ru}_2\text{B}_6\text{H}_6$  structures

| No | Initial structure              | Final energy (a.u.) | $\Delta E$ kcal/mole |
|----|--------------------------------|---------------------|----------------------|
| 1  | 08-Ru-10-DicapTrPr-C2v-f_r-20  | -729.79164209       | 0.00                 |
| 2  | 08-Ru-01-Cub-b                 | -729.79149688       | 0.09                 |
| 3  | 08-Ru-05-Bisdisph-d            | -729.79149688       | 0.09                 |
| 4  | 08-Ru-06-Bipirhex-a            | -729.79149688       | 0.09                 |
| 5  | 08-Ru-07-Tdallcap-d            | -729.79149688       | 0.09                 |
| 6  | 08-Ru-08-Nido-c                | -729.79149688       | 0.09                 |
| 7  | 08-Ru-08-Nido-f                | -729.79149688       | 0.09                 |
| 8  | 08-Ru-09-DicapTrPr-Cs-e        | -729.79149688       | 0.09                 |
| 9  | 08-Ru-09-DicapTrPr-Cs-i        | -729.79149688       | 0.09                 |
| 10 | 08-Ru-10-DicapTrPr-C2v-f_r-173 | -729.79149688       | 0.09                 |
| 11 | 08-Ru-09-DicapTrPr-Cs-r        | -729.75565119       | 22.58                |
| 12 | 08-Ru-09-DicapTrPr-Cs-k        | -729.74585282       | 28.73                |
| 13 | 08-Ru-09-DicapTrPr-Cs-a        | -729.74585281       | 28.73                |
| 14 | 08-Ru-11-DicapOh-k             | -729.74585281       | 28.73                |
| 15 | 08-Ru-04-AntiprTrig-c          | -729.74585280       | 28.73                |
| 16 | 08-Ru-04-AntiprTrig-d          | -729.74585278       | 28.73                |
| 17 | 08-Ru-09-DicapTrPr-Cs-m        | -729.73344384       | 36.52                |
| 18 | 08-Ru-09-DicapTrPr-Cs-n        | -729.73344379       | 36.52                |
| 19 | 08-Ru-11-DicapOh-b             | -729.73344379       | 36.52                |
| 20 | 08-Ru-08-Nido-h                | -729.72783064       | 40.04                |
| 21 | 08-Ru-02-Antipr-d              | -729.72405327       | 42.41                |
| 22 | 08-Ru-04-AntiprTrig-g          | -729.72313835       | 42.99                |
| 23 | 08-Ru-01-Cub-a                 | -729.72288185       | 43.15                |
| 24 | 08-Ru-03-PrTrig-d              | -729.72288185       | 43.15                |
| 25 | 08-Ru-08-Nido-e                | -729.72288185       | 43.15                |
| 26 | 08-Ru-08-Nido-i                | -729.72288185       | 43.15                |
| 27 | 08-Ru-07-Tdallcap-b            | -729.72064514       | 44.55                |
| 28 | 08-Ru-11-DicapOh-h             | -729.71747737       | 46.54                |
| 29 | 08-Ru-09-DicapTrPr-Cs-f        | -729.71689298       | 46.91                |
| 30 | 08-Ru-06-Bipirhex-d            | -729.71435601       | 48.50                |
| 31 | 08-Ru-07-Tdallcap-e            | -729.71374762       | 48.88                |
| 32 | 08-Ru-02-Antipr-c              | -729.71344984       | 49.07                |
| 33 | 08-Ru-05-Bisdisph-b            | -729.71344984       | 49.07                |
| 34 | 08-Ru-10-DicapTrPr-C2v-c_r-362 | -729.71344984       | 49.07                |
| 35 | 08-Ru-10-DicapTrPr-C2v-b       | -729.71344983       | 49.07                |
| 36 | 08-Ru-10-DicapTrPr-C2v-d       | -729.71256957       | 49.62                |
| 37 | 08-Ru-09-DicapTrPr-Cs-q        | -729.71156723       | 50.25                |
| 38 | 08-Ru-01-Cub-c_r-18            | -729.71129097       | 50.42                |
| 39 | 08-Ru-07-Tdallcap-c            | -729.71120402       | 50.47                |
| 40 | 08-Ru-11-DicapOh-i             | -729.71113717       | 50.52                |
| 41 | 08-Ru-06-Bipirhex-b            | -729.71108296       | 50.55                |
| 42 | 08-Ru-09-DicapTrPr-Cs-p        | -729.71054527       | 50.89                |

|    |                                     |               |       |
|----|-------------------------------------|---------------|-------|
| 43 | 08-Ru-11-DicapOh-c                  | -729.71054527 | 50.89 |
| 44 | 08-Ru-03-PrTrig-b                   | -729.71016757 | 51.13 |
| 45 | 08-Ru-04-AntiprTrig-h               | -729.70791500 | 52.54 |
| 46 | 08-Ru-08-Nido-g                     | -729.70764036 | 52.71 |
| 47 | 08-Ru-03-PrTrig-f                   | -729.70595679 | 53.77 |
| 48 | 08-Ru-09-DicapTrPr-Cs-c             | -729.70463600 | 54.60 |
| 49 | 08-Ru-11-DicapOh-j                  | -729.70463600 | 54.60 |
| 50 | 08-Ru-04-AntiprTrig-f               | -729.70461225 | 54.61 |
| 51 | 08-Ru-08-Nido-d                     | -729.70293109 | 55.67 |
| 52 | 08-Ru-10-DicapTrPr-C2v-e            | -729.70293108 | 55.67 |
| 53 | 08-Ru-05-Bisdisph-c                 | -729.70293107 | 55.67 |
| 54 | 08-Ru-09-DicapTrPr-Cs-j             | -729.70293107 | 55.67 |
| 55 | 08-Ru-10-DicapTrPr-C2v-j_r-126      | -729.70293107 | 55.67 |
| 56 | 08-Ru-10-DicapTrPr-C2v-f_r-113-61   | -729.70209751 | 56.19 |
| 57 | 08-Ru-11-DicapOh-g                  | -729.70145995 | 56.59 |
| 58 | 08-Ru-09-DicapTrPr-Cs-d             | -729.69884101 | 58.23 |
| 59 | 08-Ru-11-DicapOh-a                  | -729.69881727 | 58.25 |
| 60 | 08-Ru-08-Nido-b                     | -729.69731032 | 59.19 |
| 61 | 08-Ru-09-DicapTrPr-Cs-o             | -729.69731032 | 59.19 |
| 62 | 08-Ru-05-Bisdisph-e                 | -729.69646205 | 59.73 |
| 63 | 08-Ru-03-PrTrig-e                   | -729.69598744 | 60.02 |
| 64 | 08-Ru-07-Tdallcap-a                 | -729.69437886 | 61.03 |
| 65 | 08-Ru-05-Bisdisph-a                 | -729.69368205 | 61.47 |
| 66 | 08-Ru-02-Antipr-a                   | -729.69368204 | 61.47 |
| 67 | 08-Ru-09-DicapTrPr-Cs-g             | -729.69368204 | 61.47 |
| 68 | 08-Ru-10-DicapTrPr-C2v-a            | -729.69368204 | 61.47 |
| 69 | 08-Ru-10-DicapTrPr-C2v-h_r-237-23   | -729.69368204 | 61.47 |
| 70 | 08-Ru-10-DicapTrPr-C2v-h_r-237 i-23 | -729.69310335 | 61.83 |
| 71 | 08-Ru-10-DicapTrPr-C2v-c i-362      | -729.68311237 | 68.10 |
| 72 | 08-Ru-10-DicapTrPr-C2v-j i-126      | -729.68269957 | 68.36 |
| 73 | 08-Ru-10-DicapTrPr-C2v-i            | -729.67986859 | 70.14 |
| 74 | 08-Ru-02-Antipr-b                   | -729.67986858 | 70.14 |
| 75 | 08-Ru-09-DicapTrPr-Cs-h             | -729.67946628 | 70.39 |
| 76 | 08-Ru-06-Bipirhex-c                 | -729.67798074 | 71.32 |
| 77 | 08-Ru-09-DicapTrPr-Cs-l             | -729.67455503 | 73.47 |
| 78 | 08-Ru-03-PrTrig-c                   | -729.67100848 | 75.70 |
| 79 | 08-Ru-08-Nido-a                     | -729.67025037 | 76.17 |
| 80 | 08-Ru-11-DicapOh-e                  | -729.66681424 | 78.33 |
| 81 | 08-Ru-10-DicapTrPr-C2v-h i-237      | -729.66445319 | 79.81 |
| 82 | 08-Ru-10-DicapTrPr-C2v-g            | -729.66415404 | 80.00 |
| 83 | 08-Ru-01-Cub-c i-18                 | -729.66263956 | 80.95 |
| 84 | 08-Ru-11-DicapOh-f                  | -729.66047163 | 82.31 |

|    |                                     |               |        |
|----|-------------------------------------|---------------|--------|
| 85 | 08-Ru-11-DicapOh-d                  | -729.65532661 | 85.54  |
| 86 | 08-Ru-09-DicapTrPr-Cs-b             | -729.65053840 | 88.54  |
| 87 | 08-Ru-04-AntiprTrig-a               | -729.65042241 | 88.62  |
| 88 | 08-Ru-04-AntiprTrig-b               | -729.65042238 | 88.62  |
| 89 | 08-Ru-10-DicapTrPr-C2v-f_r-113 i-61 | -729.64773420 | 90.30  |
| 90 | 08-Ru-03-PrTrig-a                   | -729.64279601 | 93.40  |
| 91 | 08-Ru-04-AntiprTrig-e_r-228         | -729.64178217 | 94.04  |
| 92 | 08-Ru-05-Bisdisph-f_i-31            | -729.62009043 | 107.65 |
| 93 | 08-Ru-05-Bisdisph-f_i-34            | -729.62009043 | 107.65 |
| 94 | 08-Ru-10-DicapTrPr-C2v-f imag       | -729.61870547 | 108.52 |
| 95 | 08-Ru-05-Bisdisph-f imag            | -729.61654418 | 109.87 |
| 96 | 08-Ru-04-AntiprTrig-e i-228         | -729.59571441 | 122.94 |



## The 9-vertex $\text{Cp}_2\text{Ru}_2\text{B}_7\text{H}_7$ System

Table S2A. Initial structures

Table S2B. Best structures distances

Table S2C. Global ranking of all structures

Table S2A. Initial  $\text{Cp}_2\text{Ru}_2\text{B}_7\text{H}_7$  structures (one example from each family); 43 structures in total

| <b>Initial structures</b>                                                           |                                                |
|-------------------------------------------------------------------------------------|------------------------------------------------|
| 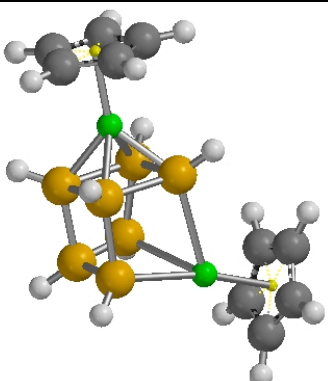   | 1. Capped cube 9 structures                    |
|   | 2. Pressed capped cube 15 structures           |
|  | 3. $\text{Tl}_9$ -like structure 13 structures |
|  | 4. Tricapped trigonal prism 6 structures       |

Table S2B. Distance table for the lowest energy Cp<sub>2</sub>Ru<sub>2</sub>B<sub>7</sub>H<sub>7</sub> structures

| 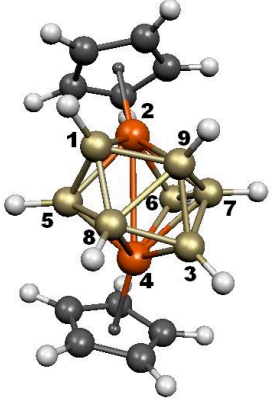 <p><b>1. -755.23909887 0.0 kcal/mole</b></p>       | <table border="1"> <thead> <tr> <th></th> <th>1</th> <th>2</th> <th>3</th> <th>4</th> <th>5</th> </tr> </thead> <tbody> <tr><td>1 B</td><td>0.000000</td><td></td><td></td><td></td><td></td></tr> <tr><td>2 Ru</td><td>2.101074</td><td>0.000000</td><td></td><td></td><td></td></tr> <tr><td>3 B</td><td>2.895737</td><td>3.246618</td><td>0.000000</td><td></td><td></td></tr> <tr><td>4 Ru</td><td>3.186346</td><td>2.800694</td><td>2.074321</td><td>0.000000</td><td></td></tr> <tr><td>5 B</td><td>1.773037</td><td>2.220171</td><td>2.970139</td><td>2.083898</td><td>0.000000</td></tr> <tr><td>6 B</td><td>3.673707</td><td>2.061768</td><td>3.054122</td><td>2.038913</td><td>3.065326</td></tr> <tr><td>7 B</td><td>2.999032</td><td>2.195978</td><td>1.766088</td><td>2.275820</td><td>3.148634</td></tr> <tr><td>8 B</td><td>1.692749</td><td>2.989183</td><td>1.772447</td><td>2.329558</td><td>1.796524</td></tr> <tr><td>9 B</td><td>1.788765</td><td>2.308795</td><td>1.779719</td><td>2.982602</td><td>2.816873</td></tr> <tr><td></td><td>6</td><td>7</td><td>8</td><td>9</td><td></td></tr> <tr><td>6 B</td><td>0.000000</td><td></td><td></td><td></td><td></td></tr> <tr><td>7 B</td><td>1.781936</td><td>0.000000</td><td></td><td></td><td></td></tr> <tr><td>8 B</td><td>3.646101</td><td>2.808598</td><td>0.000000</td><td></td><td></td></tr> <tr><td>9 B</td><td>3.169338</td><td>1.729388</td><td>1.931713</td><td>0.000000</td><td></td></tr> </tbody> </table>   |          | 1        | 2        | 3        | 4 | 5 | 1 B | 0.000000 |  |  |  |  | 2 Ru | 2.101074 | 0.000000 |  |  |  | 3 B | 2.895737 | 3.246618 | 0.000000 |  |  | 4 Ru | 3.186346 | 2.800694 | 2.074321 | 0.000000 |  | 5 B | 1.773037 | 2.220171 | 2.970139 | 2.083898 | 0.000000 | 6 B  | 3.673707 | 2.061768 | 3.054122 | 2.038913 | 3.065326 | 7 B  | 2.999032 | 2.195978 | 1.766088 | 2.275820 | 3.148634 | 8 B | 1.692749 | 2.989183 | 1.772447 | 2.329558 | 1.796524 | 9 B  | 1.788765 | 2.308795 | 1.779719 | 2.982602 | 2.816873 |  | 6 | 7 | 8 | 9 |  | 6 B  | 0.000000 |  |  |  |  | 7 B  | 1.781936 | 0.000000 |  |  |  | 8 B | 3.646101 | 2.808598 | 0.000000 |  |  | 9 B  | 3.169338 | 1.729388 | 1.931713 | 0.000000 |  |
|--------------------------------------------------------------------------------------------------------------------------------------|--------------------------------------------------------------------------------------------------------------------------------------------------------------------------------------------------------------------------------------------------------------------------------------------------------------------------------------------------------------------------------------------------------------------------------------------------------------------------------------------------------------------------------------------------------------------------------------------------------------------------------------------------------------------------------------------------------------------------------------------------------------------------------------------------------------------------------------------------------------------------------------------------------------------------------------------------------------------------------------------------------------------------------------------------------------------------------------------------------------------------------------------------------------------------------------------------------------------------------------------------------------------------------------------------------------------------------------------------------------------------------------------------------------------------------------------------------------------------------------------------|----------|----------|----------|----------|---|---|-----|----------|--|--|--|--|------|----------|----------|--|--|--|-----|----------|----------|----------|--|--|------|----------|----------|----------|----------|--|-----|----------|----------|----------|----------|----------|------|----------|----------|----------|----------|----------|------|----------|----------|----------|----------|----------|-----|----------|----------|----------|----------|----------|------|----------|----------|----------|----------|----------|--|---|---|---|---|--|------|----------|--|--|--|--|------|----------|----------|--|--|--|-----|----------|----------|----------|--|--|------|----------|----------|----------|----------|--|
|                                                                                                                                      | 1                                                                                                                                                                                                                                                                                                                                                                                                                                                                                                                                                                                                                                                                                                                                                                                                                                                                                                                                                                                                                                                                                                                                                                                                                                                                                                                                                                                                                                                                                                | 2        | 3        | 4        | 5        |   |   |     |          |  |  |  |  |      |          |          |  |  |  |     |          |          |          |  |  |      |          |          |          |          |  |     |          |          |          |          |          |      |          |          |          |          |          |      |          |          |          |          |          |     |          |          |          |          |          |      |          |          |          |          |          |  |   |   |   |   |  |      |          |  |  |  |  |      |          |          |  |  |  |     |          |          |          |  |  |      |          |          |          |          |  |
| 1 B                                                                                                                                  | 0.000000                                                                                                                                                                                                                                                                                                                                                                                                                                                                                                                                                                                                                                                                                                                                                                                                                                                                                                                                                                                                                                                                                                                                                                                                                                                                                                                                                                                                                                                                                         |          |          |          |          |   |   |     |          |  |  |  |  |      |          |          |  |  |  |     |          |          |          |  |  |      |          |          |          |          |  |     |          |          |          |          |          |      |          |          |          |          |          |      |          |          |          |          |          |     |          |          |          |          |          |      |          |          |          |          |          |  |   |   |   |   |  |      |          |  |  |  |  |      |          |          |  |  |  |     |          |          |          |  |  |      |          |          |          |          |  |
| 2 Ru                                                                                                                                 | 2.101074                                                                                                                                                                                                                                                                                                                                                                                                                                                                                                                                                                                                                                                                                                                                                                                                                                                                                                                                                                                                                                                                                                                                                                                                                                                                                                                                                                                                                                                                                         | 0.000000 |          |          |          |   |   |     |          |  |  |  |  |      |          |          |  |  |  |     |          |          |          |  |  |      |          |          |          |          |  |     |          |          |          |          |          |      |          |          |          |          |          |      |          |          |          |          |          |     |          |          |          |          |          |      |          |          |          |          |          |  |   |   |   |   |  |      |          |  |  |  |  |      |          |          |  |  |  |     |          |          |          |  |  |      |          |          |          |          |  |
| 3 B                                                                                                                                  | 2.895737                                                                                                                                                                                                                                                                                                                                                                                                                                                                                                                                                                                                                                                                                                                                                                                                                                                                                                                                                                                                                                                                                                                                                                                                                                                                                                                                                                                                                                                                                         | 3.246618 | 0.000000 |          |          |   |   |     |          |  |  |  |  |      |          |          |  |  |  |     |          |          |          |  |  |      |          |          |          |          |  |     |          |          |          |          |          |      |          |          |          |          |          |      |          |          |          |          |          |     |          |          |          |          |          |      |          |          |          |          |          |  |   |   |   |   |  |      |          |  |  |  |  |      |          |          |  |  |  |     |          |          |          |  |  |      |          |          |          |          |  |
| 4 Ru                                                                                                                                 | 3.186346                                                                                                                                                                                                                                                                                                                                                                                                                                                                                                                                                                                                                                                                                                                                                                                                                                                                                                                                                                                                                                                                                                                                                                                                                                                                                                                                                                                                                                                                                         | 2.800694 | 2.074321 | 0.000000 |          |   |   |     |          |  |  |  |  |      |          |          |  |  |  |     |          |          |          |  |  |      |          |          |          |          |  |     |          |          |          |          |          |      |          |          |          |          |          |      |          |          |          |          |          |     |          |          |          |          |          |      |          |          |          |          |          |  |   |   |   |   |  |      |          |  |  |  |  |      |          |          |  |  |  |     |          |          |          |  |  |      |          |          |          |          |  |
| 5 B                                                                                                                                  | 1.773037                                                                                                                                                                                                                                                                                                                                                                                                                                                                                                                                                                                                                                                                                                                                                                                                                                                                                                                                                                                                                                                                                                                                                                                                                                                                                                                                                                                                                                                                                         | 2.220171 | 2.970139 | 2.083898 | 0.000000 |   |   |     |          |  |  |  |  |      |          |          |  |  |  |     |          |          |          |  |  |      |          |          |          |          |  |     |          |          |          |          |          |      |          |          |          |          |          |      |          |          |          |          |          |     |          |          |          |          |          |      |          |          |          |          |          |  |   |   |   |   |  |      |          |  |  |  |  |      |          |          |  |  |  |     |          |          |          |  |  |      |          |          |          |          |  |
| 6 B                                                                                                                                  | 3.673707                                                                                                                                                                                                                                                                                                                                                                                                                                                                                                                                                                                                                                                                                                                                                                                                                                                                                                                                                                                                                                                                                                                                                                                                                                                                                                                                                                                                                                                                                         | 2.061768 | 3.054122 | 2.038913 | 3.065326 |   |   |     |          |  |  |  |  |      |          |          |  |  |  |     |          |          |          |  |  |      |          |          |          |          |  |     |          |          |          |          |          |      |          |          |          |          |          |      |          |          |          |          |          |     |          |          |          |          |          |      |          |          |          |          |          |  |   |   |   |   |  |      |          |  |  |  |  |      |          |          |  |  |  |     |          |          |          |  |  |      |          |          |          |          |  |
| 7 B                                                                                                                                  | 2.999032                                                                                                                                                                                                                                                                                                                                                                                                                                                                                                                                                                                                                                                                                                                                                                                                                                                                                                                                                                                                                                                                                                                                                                                                                                                                                                                                                                                                                                                                                         | 2.195978 | 1.766088 | 2.275820 | 3.148634 |   |   |     |          |  |  |  |  |      |          |          |  |  |  |     |          |          |          |  |  |      |          |          |          |          |  |     |          |          |          |          |          |      |          |          |          |          |          |      |          |          |          |          |          |     |          |          |          |          |          |      |          |          |          |          |          |  |   |   |   |   |  |      |          |  |  |  |  |      |          |          |  |  |  |     |          |          |          |  |  |      |          |          |          |          |  |
| 8 B                                                                                                                                  | 1.692749                                                                                                                                                                                                                                                                                                                                                                                                                                                                                                                                                                                                                                                                                                                                                                                                                                                                                                                                                                                                                                                                                                                                                                                                                                                                                                                                                                                                                                                                                         | 2.989183 | 1.772447 | 2.329558 | 1.796524 |   |   |     |          |  |  |  |  |      |          |          |  |  |  |     |          |          |          |  |  |      |          |          |          |          |  |     |          |          |          |          |          |      |          |          |          |          |          |      |          |          |          |          |          |     |          |          |          |          |          |      |          |          |          |          |          |  |   |   |   |   |  |      |          |  |  |  |  |      |          |          |  |  |  |     |          |          |          |  |  |      |          |          |          |          |  |
| 9 B                                                                                                                                  | 1.788765                                                                                                                                                                                                                                                                                                                                                                                                                                                                                                                                                                                                                                                                                                                                                                                                                                                                                                                                                                                                                                                                                                                                                                                                                                                                                                                                                                                                                                                                                         | 2.308795 | 1.779719 | 2.982602 | 2.816873 |   |   |     |          |  |  |  |  |      |          |          |  |  |  |     |          |          |          |  |  |      |          |          |          |          |  |     |          |          |          |          |          |      |          |          |          |          |          |      |          |          |          |          |          |     |          |          |          |          |          |      |          |          |          |          |          |  |   |   |   |   |  |      |          |  |  |  |  |      |          |          |  |  |  |     |          |          |          |  |  |      |          |          |          |          |  |
|                                                                                                                                      | 6                                                                                                                                                                                                                                                                                                                                                                                                                                                                                                                                                                                                                                                                                                                                                                                                                                                                                                                                                                                                                                                                                                                                                                                                                                                                                                                                                                                                                                                                                                | 7        | 8        | 9        |          |   |   |     |          |  |  |  |  |      |          |          |  |  |  |     |          |          |          |  |  |      |          |          |          |          |  |     |          |          |          |          |          |      |          |          |          |          |          |      |          |          |          |          |          |     |          |          |          |          |          |      |          |          |          |          |          |  |   |   |   |   |  |      |          |  |  |  |  |      |          |          |  |  |  |     |          |          |          |  |  |      |          |          |          |          |  |
| 6 B                                                                                                                                  | 0.000000                                                                                                                                                                                                                                                                                                                                                                                                                                                                                                                                                                                                                                                                                                                                                                                                                                                                                                                                                                                                                                                                                                                                                                                                                                                                                                                                                                                                                                                                                         |          |          |          |          |   |   |     |          |  |  |  |  |      |          |          |  |  |  |     |          |          |          |  |  |      |          |          |          |          |  |     |          |          |          |          |          |      |          |          |          |          |          |      |          |          |          |          |          |     |          |          |          |          |          |      |          |          |          |          |          |  |   |   |   |   |  |      |          |  |  |  |  |      |          |          |  |  |  |     |          |          |          |  |  |      |          |          |          |          |  |
| 7 B                                                                                                                                  | 1.781936                                                                                                                                                                                                                                                                                                                                                                                                                                                                                                                                                                                                                                                                                                                                                                                                                                                                                                                                                                                                                                                                                                                                                                                                                                                                                                                                                                                                                                                                                         | 0.000000 |          |          |          |   |   |     |          |  |  |  |  |      |          |          |  |  |  |     |          |          |          |  |  |      |          |          |          |          |  |     |          |          |          |          |          |      |          |          |          |          |          |      |          |          |          |          |          |     |          |          |          |          |          |      |          |          |          |          |          |  |   |   |   |   |  |      |          |  |  |  |  |      |          |          |  |  |  |     |          |          |          |  |  |      |          |          |          |          |  |
| 8 B                                                                                                                                  | 3.646101                                                                                                                                                                                                                                                                                                                                                                                                                                                                                                                                                                                                                                                                                                                                                                                                                                                                                                                                                                                                                                                                                                                                                                                                                                                                                                                                                                                                                                                                                         | 2.808598 | 0.000000 |          |          |   |   |     |          |  |  |  |  |      |          |          |  |  |  |     |          |          |          |  |  |      |          |          |          |          |  |     |          |          |          |          |          |      |          |          |          |          |          |      |          |          |          |          |          |     |          |          |          |          |          |      |          |          |          |          |          |  |   |   |   |   |  |      |          |  |  |  |  |      |          |          |  |  |  |     |          |          |          |  |  |      |          |          |          |          |  |
| 9 B                                                                                                                                  | 3.169338                                                                                                                                                                                                                                                                                                                                                                                                                                                                                                                                                                                                                                                                                                                                                                                                                                                                                                                                                                                                                                                                                                                                                                                                                                                                                                                                                                                                                                                                                         | 1.729388 | 1.931713 | 0.000000 |          |   |   |     |          |  |  |  |  |      |          |          |  |  |  |     |          |          |          |  |  |      |          |          |          |          |  |     |          |          |          |          |          |      |          |          |          |          |          |      |          |          |          |          |          |     |          |          |          |          |          |      |          |          |          |          |          |  |   |   |   |   |  |      |          |  |  |  |  |      |          |          |  |  |  |     |          |          |          |  |  |      |          |          |          |          |  |
|  <p><b>2. -755.22461710 +9.1 C<sub>s</sub></b></p> | <table border="1"> <thead> <tr> <th></th> <th>1</th> <th>2</th> <th>3</th> <th>4</th> <th>5</th> </tr> </thead> <tbody> <tr><td>1 B</td><td>0.000000</td><td></td><td></td><td></td><td></td></tr> <tr><td>2 B</td><td>2.740002</td><td>0.000000</td><td></td><td></td><td></td></tr> <tr><td>3 B</td><td>1.798062</td><td>1.803802</td><td>0.000000</td><td></td><td></td></tr> <tr><td>4 Ru</td><td>2.170590</td><td>2.205498</td><td>2.303814</td><td>0.000000</td><td></td></tr> <tr><td>5 B</td><td>3.272411</td><td>1.749606</td><td>3.177492</td><td>2.043237</td><td>0.000000</td></tr> <tr><td>6 B</td><td>1.648728</td><td>3.397508</td><td>3.165440</td><td>2.094621</td><td>3.008630</td></tr> <tr><td>7 Ru</td><td>2.251270</td><td>2.288685</td><td>2.901356</td><td>2.730366</td><td>2.108200</td></tr> <tr><td>8 B</td><td>1.642072</td><td>2.727016</td><td>1.833735</td><td>3.371997</td><td>3.794222</td></tr> <tr><td>9 B</td><td>2.646600</td><td>1.673664</td><td>1.801256</td><td>3.361067</td><td>3.104394</td></tr> <tr><td></td><td>6</td><td>7</td><td>8</td><td>9</td><td></td></tr> <tr><td>6 B</td><td>0.000000</td><td></td><td></td><td></td><td></td></tr> <tr><td>7 Ru</td><td>2.215200</td><td>0.000000</td><td></td><td></td><td></td></tr> <tr><td>8 B</td><td>3.048333</td><td>2.374315</td><td>0.000000</td><td></td><td></td></tr> <tr><td>9 B</td><td>3.787944</td><td>2.350118</td><td>1.632101</td><td>0.000000</td><td></td></tr> </tbody> </table>  |          | 1        | 2        | 3        | 4 | 5 | 1 B | 0.000000 |  |  |  |  | 2 B  | 2.740002 | 0.000000 |  |  |  | 3 B | 1.798062 | 1.803802 | 0.000000 |  |  | 4 Ru | 2.170590 | 2.205498 | 2.303814 | 0.000000 |  | 5 B | 3.272411 | 1.749606 | 3.177492 | 2.043237 | 0.000000 | 6 B  | 1.648728 | 3.397508 | 3.165440 | 2.094621 | 3.008630 | 7 Ru | 2.251270 | 2.288685 | 2.901356 | 2.730366 | 2.108200 | 8 B | 1.642072 | 2.727016 | 1.833735 | 3.371997 | 3.794222 | 9 B  | 2.646600 | 1.673664 | 1.801256 | 3.361067 | 3.104394 |  | 6 | 7 | 8 | 9 |  | 6 B  | 0.000000 |  |  |  |  | 7 Ru | 2.215200 | 0.000000 |  |  |  | 8 B | 3.048333 | 2.374315 | 0.000000 |  |  | 9 B  | 3.787944 | 2.350118 | 1.632101 | 0.000000 |  |
|                                                                                                                                      | 1                                                                                                                                                                                                                                                                                                                                                                                                                                                                                                                                                                                                                                                                                                                                                                                                                                                                                                                                                                                                                                                                                                                                                                                                                                                                                                                                                                                                                                                                                                | 2        | 3        | 4        | 5        |   |   |     |          |  |  |  |  |      |          |          |  |  |  |     |          |          |          |  |  |      |          |          |          |          |  |     |          |          |          |          |          |      |          |          |          |          |          |      |          |          |          |          |          |     |          |          |          |          |          |      |          |          |          |          |          |  |   |   |   |   |  |      |          |  |  |  |  |      |          |          |  |  |  |     |          |          |          |  |  |      |          |          |          |          |  |
| 1 B                                                                                                                                  | 0.000000                                                                                                                                                                                                                                                                                                                                                                                                                                                                                                                                                                                                                                                                                                                                                                                                                                                                                                                                                                                                                                                                                                                                                                                                                                                                                                                                                                                                                                                                                         |          |          |          |          |   |   |     |          |  |  |  |  |      |          |          |  |  |  |     |          |          |          |  |  |      |          |          |          |          |  |     |          |          |          |          |          |      |          |          |          |          |          |      |          |          |          |          |          |     |          |          |          |          |          |      |          |          |          |          |          |  |   |   |   |   |  |      |          |  |  |  |  |      |          |          |  |  |  |     |          |          |          |  |  |      |          |          |          |          |  |
| 2 B                                                                                                                                  | 2.740002                                                                                                                                                                                                                                                                                                                                                                                                                                                                                                                                                                                                                                                                                                                                                                                                                                                                                                                                                                                                                                                                                                                                                                                                                                                                                                                                                                                                                                                                                         | 0.000000 |          |          |          |   |   |     |          |  |  |  |  |      |          |          |  |  |  |     |          |          |          |  |  |      |          |          |          |          |  |     |          |          |          |          |          |      |          |          |          |          |          |      |          |          |          |          |          |     |          |          |          |          |          |      |          |          |          |          |          |  |   |   |   |   |  |      |          |  |  |  |  |      |          |          |  |  |  |     |          |          |          |  |  |      |          |          |          |          |  |
| 3 B                                                                                                                                  | 1.798062                                                                                                                                                                                                                                                                                                                                                                                                                                                                                                                                                                                                                                                                                                                                                                                                                                                                                                                                                                                                                                                                                                                                                                                                                                                                                                                                                                                                                                                                                         | 1.803802 | 0.000000 |          |          |   |   |     |          |  |  |  |  |      |          |          |  |  |  |     |          |          |          |  |  |      |          |          |          |          |  |     |          |          |          |          |          |      |          |          |          |          |          |      |          |          |          |          |          |     |          |          |          |          |          |      |          |          |          |          |          |  |   |   |   |   |  |      |          |  |  |  |  |      |          |          |  |  |  |     |          |          |          |  |  |      |          |          |          |          |  |
| 4 Ru                                                                                                                                 | 2.170590                                                                                                                                                                                                                                                                                                                                                                                                                                                                                                                                                                                                                                                                                                                                                                                                                                                                                                                                                                                                                                                                                                                                                                                                                                                                                                                                                                                                                                                                                         | 2.205498 | 2.303814 | 0.000000 |          |   |   |     |          |  |  |  |  |      |          |          |  |  |  |     |          |          |          |  |  |      |          |          |          |          |  |     |          |          |          |          |          |      |          |          |          |          |          |      |          |          |          |          |          |     |          |          |          |          |          |      |          |          |          |          |          |  |   |   |   |   |  |      |          |  |  |  |  |      |          |          |  |  |  |     |          |          |          |  |  |      |          |          |          |          |  |
| 5 B                                                                                                                                  | 3.272411                                                                                                                                                                                                                                                                                                                                                                                                                                                                                                                                                                                                                                                                                                                                                                                                                                                                                                                                                                                                                                                                                                                                                                                                                                                                                                                                                                                                                                                                                         | 1.749606 | 3.177492 | 2.043237 | 0.000000 |   |   |     |          |  |  |  |  |      |          |          |  |  |  |     |          |          |          |  |  |      |          |          |          |          |  |     |          |          |          |          |          |      |          |          |          |          |          |      |          |          |          |          |          |     |          |          |          |          |          |      |          |          |          |          |          |  |   |   |   |   |  |      |          |  |  |  |  |      |          |          |  |  |  |     |          |          |          |  |  |      |          |          |          |          |  |
| 6 B                                                                                                                                  | 1.648728                                                                                                                                                                                                                                                                                                                                                                                                                                                                                                                                                                                                                                                                                                                                                                                                                                                                                                                                                                                                                                                                                                                                                                                                                                                                                                                                                                                                                                                                                         | 3.397508 | 3.165440 | 2.094621 | 3.008630 |   |   |     |          |  |  |  |  |      |          |          |  |  |  |     |          |          |          |  |  |      |          |          |          |          |  |     |          |          |          |          |          |      |          |          |          |          |          |      |          |          |          |          |          |     |          |          |          |          |          |      |          |          |          |          |          |  |   |   |   |   |  |      |          |  |  |  |  |      |          |          |  |  |  |     |          |          |          |  |  |      |          |          |          |          |  |
| 7 Ru                                                                                                                                 | 2.251270                                                                                                                                                                                                                                                                                                                                                                                                                                                                                                                                                                                                                                                                                                                                                                                                                                                                                                                                                                                                                                                                                                                                                                                                                                                                                                                                                                                                                                                                                         | 2.288685 | 2.901356 | 2.730366 | 2.108200 |   |   |     |          |  |  |  |  |      |          |          |  |  |  |     |          |          |          |  |  |      |          |          |          |          |  |     |          |          |          |          |          |      |          |          |          |          |          |      |          |          |          |          |          |     |          |          |          |          |          |      |          |          |          |          |          |  |   |   |   |   |  |      |          |  |  |  |  |      |          |          |  |  |  |     |          |          |          |  |  |      |          |          |          |          |  |
| 8 B                                                                                                                                  | 1.642072                                                                                                                                                                                                                                                                                                                                                                                                                                                                                                                                                                                                                                                                                                                                                                                                                                                                                                                                                                                                                                                                                                                                                                                                                                                                                                                                                                                                                                                                                         | 2.727016 | 1.833735 | 3.371997 | 3.794222 |   |   |     |          |  |  |  |  |      |          |          |  |  |  |     |          |          |          |  |  |      |          |          |          |          |  |     |          |          |          |          |          |      |          |          |          |          |          |      |          |          |          |          |          |     |          |          |          |          |          |      |          |          |          |          |          |  |   |   |   |   |  |      |          |  |  |  |  |      |          |          |  |  |  |     |          |          |          |  |  |      |          |          |          |          |  |
| 9 B                                                                                                                                  | 2.646600                                                                                                                                                                                                                                                                                                                                                                                                                                                                                                                                                                                                                                                                                                                                                                                                                                                                                                                                                                                                                                                                                                                                                                                                                                                                                                                                                                                                                                                                                         | 1.673664 | 1.801256 | 3.361067 | 3.104394 |   |   |     |          |  |  |  |  |      |          |          |  |  |  |     |          |          |          |  |  |      |          |          |          |          |  |     |          |          |          |          |          |      |          |          |          |          |          |      |          |          |          |          |          |     |          |          |          |          |          |      |          |          |          |          |          |  |   |   |   |   |  |      |          |  |  |  |  |      |          |          |  |  |  |     |          |          |          |  |  |      |          |          |          |          |  |
|                                                                                                                                      | 6                                                                                                                                                                                                                                                                                                                                                                                                                                                                                                                                                                                                                                                                                                                                                                                                                                                                                                                                                                                                                                                                                                                                                                                                                                                                                                                                                                                                                                                                                                | 7        | 8        | 9        |          |   |   |     |          |  |  |  |  |      |          |          |  |  |  |     |          |          |          |  |  |      |          |          |          |          |  |     |          |          |          |          |          |      |          |          |          |          |          |      |          |          |          |          |          |     |          |          |          |          |          |      |          |          |          |          |          |  |   |   |   |   |  |      |          |  |  |  |  |      |          |          |  |  |  |     |          |          |          |  |  |      |          |          |          |          |  |
| 6 B                                                                                                                                  | 0.000000                                                                                                                                                                                                                                                                                                                                                                                                                                                                                                                                                                                                                                                                                                                                                                                                                                                                                                                                                                                                                                                                                                                                                                                                                                                                                                                                                                                                                                                                                         |          |          |          |          |   |   |     |          |  |  |  |  |      |          |          |  |  |  |     |          |          |          |  |  |      |          |          |          |          |  |     |          |          |          |          |          |      |          |          |          |          |          |      |          |          |          |          |          |     |          |          |          |          |          |      |          |          |          |          |          |  |   |   |   |   |  |      |          |  |  |  |  |      |          |          |  |  |  |     |          |          |          |  |  |      |          |          |          |          |  |
| 7 Ru                                                                                                                                 | 2.215200                                                                                                                                                                                                                                                                                                                                                                                                                                                                                                                                                                                                                                                                                                                                                                                                                                                                                                                                                                                                                                                                                                                                                                                                                                                                                                                                                                                                                                                                                         | 0.000000 |          |          |          |   |   |     |          |  |  |  |  |      |          |          |  |  |  |     |          |          |          |  |  |      |          |          |          |          |  |     |          |          |          |          |          |      |          |          |          |          |          |      |          |          |          |          |          |     |          |          |          |          |          |      |          |          |          |          |          |  |   |   |   |   |  |      |          |  |  |  |  |      |          |          |  |  |  |     |          |          |          |  |  |      |          |          |          |          |  |
| 8 B                                                                                                                                  | 3.048333                                                                                                                                                                                                                                                                                                                                                                                                                                                                                                                                                                                                                                                                                                                                                                                                                                                                                                                                                                                                                                                                                                                                                                                                                                                                                                                                                                                                                                                                                         | 2.374315 | 0.000000 |          |          |   |   |     |          |  |  |  |  |      |          |          |  |  |  |     |          |          |          |  |  |      |          |          |          |          |  |     |          |          |          |          |          |      |          |          |          |          |          |      |          |          |          |          |          |     |          |          |          |          |          |      |          |          |          |          |          |  |   |   |   |   |  |      |          |  |  |  |  |      |          |          |  |  |  |     |          |          |          |  |  |      |          |          |          |          |  |
| 9 B                                                                                                                                  | 3.787944                                                                                                                                                                                                                                                                                                                                                                                                                                                                                                                                                                                                                                                                                                                                                                                                                                                                                                                                                                                                                                                                                                                                                                                                                                                                                                                                                                                                                                                                                         | 2.350118 | 1.632101 | 0.000000 |          |   |   |     |          |  |  |  |  |      |          |          |  |  |  |     |          |          |          |  |  |      |          |          |          |          |  |     |          |          |          |          |          |      |          |          |          |          |          |      |          |          |          |          |          |     |          |          |          |          |          |      |          |          |          |          |          |  |   |   |   |   |  |      |          |  |  |  |  |      |          |          |  |  |  |     |          |          |          |  |  |      |          |          |          |          |  |
|  <p><b>3. -755.20969883 +18.5</b></p>             | <table border="1"> <thead> <tr> <th></th> <th>1</th> <th>2</th> <th>3</th> <th>4</th> <th>5</th> </tr> </thead> <tbody> <tr><td>1 B</td><td>0.000000</td><td></td><td></td><td></td><td></td></tr> <tr><td>2 B</td><td>2.896173</td><td>0.000000</td><td></td><td></td><td></td></tr> <tr><td>3 B</td><td>1.708414</td><td>1.823628</td><td>0.000000</td><td></td><td></td></tr> <tr><td>4 B</td><td>1.830615</td><td>1.761386</td><td>2.035858</td><td>0.000000</td><td></td></tr> <tr><td>5 B</td><td>2.963376</td><td>1.757657</td><td>2.778122</td><td>1.754719</td><td>0.000000</td></tr> <tr><td>6 Ru</td><td>2.154017</td><td>3.488503</td><td>3.252036</td><td>2.299570</td><td>2.327429</td></tr> <tr><td>7 B</td><td>2.764466</td><td>2.773283</td><td>2.770973</td><td>2.739799</td><td>1.799388</td></tr> <tr><td>8 B</td><td>1.745772</td><td>2.957400</td><td>1.771324</td><td>2.780873</td><td>2.922794</td></tr> <tr><td>9 Ru</td><td>3.346867</td><td>2.041963</td><td>2.248539</td><td>3.127857</td><td>2.354932</td></tr> <tr><td></td><td>6</td><td>7</td><td>8</td><td>9</td><td></td></tr> <tr><td>6 Ru</td><td>0.000000</td><td></td><td></td><td></td><td></td></tr> <tr><td>7 B</td><td>1.991818</td><td>0.000000</td><td></td><td></td><td></td></tr> <tr><td>8 B</td><td>2.489169</td><td>1.814270</td><td>0.000000</td><td></td><td></td></tr> <tr><td>9 Ru</td><td>3.619158</td><td>1.908902</td><td>2.225898</td><td>0.000000</td><td></td></tr> </tbody> </table> |          | 1        | 2        | 3        | 4 | 5 | 1 B | 0.000000 |  |  |  |  | 2 B  | 2.896173 | 0.000000 |  |  |  | 3 B | 1.708414 | 1.823628 | 0.000000 |  |  | 4 B  | 1.830615 | 1.761386 | 2.035858 | 0.000000 |  | 5 B | 2.963376 | 1.757657 | 2.778122 | 1.754719 | 0.000000 | 6 Ru | 2.154017 | 3.488503 | 3.252036 | 2.299570 | 2.327429 | 7 B  | 2.764466 | 2.773283 | 2.770973 | 2.739799 | 1.799388 | 8 B | 1.745772 | 2.957400 | 1.771324 | 2.780873 | 2.922794 | 9 Ru | 3.346867 | 2.041963 | 2.248539 | 3.127857 | 2.354932 |  | 6 | 7 | 8 | 9 |  | 6 Ru | 0.000000 |  |  |  |  | 7 B  | 1.991818 | 0.000000 |  |  |  | 8 B | 2.489169 | 1.814270 | 0.000000 |  |  | 9 Ru | 3.619158 | 1.908902 | 2.225898 | 0.000000 |  |
|                                                                                                                                      | 1                                                                                                                                                                                                                                                                                                                                                                                                                                                                                                                                                                                                                                                                                                                                                                                                                                                                                                                                                                                                                                                                                                                                                                                                                                                                                                                                                                                                                                                                                                | 2        | 3        | 4        | 5        |   |   |     |          |  |  |  |  |      |          |          |  |  |  |     |          |          |          |  |  |      |          |          |          |          |  |     |          |          |          |          |          |      |          |          |          |          |          |      |          |          |          |          |          |     |          |          |          |          |          |      |          |          |          |          |          |  |   |   |   |   |  |      |          |  |  |  |  |      |          |          |  |  |  |     |          |          |          |  |  |      |          |          |          |          |  |
| 1 B                                                                                                                                  | 0.000000                                                                                                                                                                                                                                                                                                                                                                                                                                                                                                                                                                                                                                                                                                                                                                                                                                                                                                                                                                                                                                                                                                                                                                                                                                                                                                                                                                                                                                                                                         |          |          |          |          |   |   |     |          |  |  |  |  |      |          |          |  |  |  |     |          |          |          |  |  |      |          |          |          |          |  |     |          |          |          |          |          |      |          |          |          |          |          |      |          |          |          |          |          |     |          |          |          |          |          |      |          |          |          |          |          |  |   |   |   |   |  |      |          |  |  |  |  |      |          |          |  |  |  |     |          |          |          |  |  |      |          |          |          |          |  |
| 2 B                                                                                                                                  | 2.896173                                                                                                                                                                                                                                                                                                                                                                                                                                                                                                                                                                                                                                                                                                                                                                                                                                                                                                                                                                                                                                                                                                                                                                                                                                                                                                                                                                                                                                                                                         | 0.000000 |          |          |          |   |   |     |          |  |  |  |  |      |          |          |  |  |  |     |          |          |          |  |  |      |          |          |          |          |  |     |          |          |          |          |          |      |          |          |          |          |          |      |          |          |          |          |          |     |          |          |          |          |          |      |          |          |          |          |          |  |   |   |   |   |  |      |          |  |  |  |  |      |          |          |  |  |  |     |          |          |          |  |  |      |          |          |          |          |  |
| 3 B                                                                                                                                  | 1.708414                                                                                                                                                                                                                                                                                                                                                                                                                                                                                                                                                                                                                                                                                                                                                                                                                                                                                                                                                                                                                                                                                                                                                                                                                                                                                                                                                                                                                                                                                         | 1.823628 | 0.000000 |          |          |   |   |     |          |  |  |  |  |      |          |          |  |  |  |     |          |          |          |  |  |      |          |          |          |          |  |     |          |          |          |          |          |      |          |          |          |          |          |      |          |          |          |          |          |     |          |          |          |          |          |      |          |          |          |          |          |  |   |   |   |   |  |      |          |  |  |  |  |      |          |          |  |  |  |     |          |          |          |  |  |      |          |          |          |          |  |
| 4 B                                                                                                                                  | 1.830615                                                                                                                                                                                                                                                                                                                                                                                                                                                                                                                                                                                                                                                                                                                                                                                                                                                                                                                                                                                                                                                                                                                                                                                                                                                                                                                                                                                                                                                                                         | 1.761386 | 2.035858 | 0.000000 |          |   |   |     |          |  |  |  |  |      |          |          |  |  |  |     |          |          |          |  |  |      |          |          |          |          |  |     |          |          |          |          |          |      |          |          |          |          |          |      |          |          |          |          |          |     |          |          |          |          |          |      |          |          |          |          |          |  |   |   |   |   |  |      |          |  |  |  |  |      |          |          |  |  |  |     |          |          |          |  |  |      |          |          |          |          |  |
| 5 B                                                                                                                                  | 2.963376                                                                                                                                                                                                                                                                                                                                                                                                                                                                                                                                                                                                                                                                                                                                                                                                                                                                                                                                                                                                                                                                                                                                                                                                                                                                                                                                                                                                                                                                                         | 1.757657 | 2.778122 | 1.754719 | 0.000000 |   |   |     |          |  |  |  |  |      |          |          |  |  |  |     |          |          |          |  |  |      |          |          |          |          |  |     |          |          |          |          |          |      |          |          |          |          |          |      |          |          |          |          |          |     |          |          |          |          |          |      |          |          |          |          |          |  |   |   |   |   |  |      |          |  |  |  |  |      |          |          |  |  |  |     |          |          |          |  |  |      |          |          |          |          |  |
| 6 Ru                                                                                                                                 | 2.154017                                                                                                                                                                                                                                                                                                                                                                                                                                                                                                                                                                                                                                                                                                                                                                                                                                                                                                                                                                                                                                                                                                                                                                                                                                                                                                                                                                                                                                                                                         | 3.488503 | 3.252036 | 2.299570 | 2.327429 |   |   |     |          |  |  |  |  |      |          |          |  |  |  |     |          |          |          |  |  |      |          |          |          |          |  |     |          |          |          |          |          |      |          |          |          |          |          |      |          |          |          |          |          |     |          |          |          |          |          |      |          |          |          |          |          |  |   |   |   |   |  |      |          |  |  |  |  |      |          |          |  |  |  |     |          |          |          |  |  |      |          |          |          |          |  |
| 7 B                                                                                                                                  | 2.764466                                                                                                                                                                                                                                                                                                                                                                                                                                                                                                                                                                                                                                                                                                                                                                                                                                                                                                                                                                                                                                                                                                                                                                                                                                                                                                                                                                                                                                                                                         | 2.773283 | 2.770973 | 2.739799 | 1.799388 |   |   |     |          |  |  |  |  |      |          |          |  |  |  |     |          |          |          |  |  |      |          |          |          |          |  |     |          |          |          |          |          |      |          |          |          |          |          |      |          |          |          |          |          |     |          |          |          |          |          |      |          |          |          |          |          |  |   |   |   |   |  |      |          |  |  |  |  |      |          |          |  |  |  |     |          |          |          |  |  |      |          |          |          |          |  |
| 8 B                                                                                                                                  | 1.745772                                                                                                                                                                                                                                                                                                                                                                                                                                                                                                                                                                                                                                                                                                                                                                                                                                                                                                                                                                                                                                                                                                                                                                                                                                                                                                                                                                                                                                                                                         | 2.957400 | 1.771324 | 2.780873 | 2.922794 |   |   |     |          |  |  |  |  |      |          |          |  |  |  |     |          |          |          |  |  |      |          |          |          |          |  |     |          |          |          |          |          |      |          |          |          |          |          |      |          |          |          |          |          |     |          |          |          |          |          |      |          |          |          |          |          |  |   |   |   |   |  |      |          |  |  |  |  |      |          |          |  |  |  |     |          |          |          |  |  |      |          |          |          |          |  |
| 9 Ru                                                                                                                                 | 3.346867                                                                                                                                                                                                                                                                                                                                                                                                                                                                                                                                                                                                                                                                                                                                                                                                                                                                                                                                                                                                                                                                                                                                                                                                                                                                                                                                                                                                                                                                                         | 2.041963 | 2.248539 | 3.127857 | 2.354932 |   |   |     |          |  |  |  |  |      |          |          |  |  |  |     |          |          |          |  |  |      |          |          |          |          |  |     |          |          |          |          |          |      |          |          |          |          |          |      |          |          |          |          |          |     |          |          |          |          |          |      |          |          |          |          |          |  |   |   |   |   |  |      |          |  |  |  |  |      |          |          |  |  |  |     |          |          |          |  |  |      |          |          |          |          |  |
|                                                                                                                                      | 6                                                                                                                                                                                                                                                                                                                                                                                                                                                                                                                                                                                                                                                                                                                                                                                                                                                                                                                                                                                                                                                                                                                                                                                                                                                                                                                                                                                                                                                                                                | 7        | 8        | 9        |          |   |   |     |          |  |  |  |  |      |          |          |  |  |  |     |          |          |          |  |  |      |          |          |          |          |  |     |          |          |          |          |          |      |          |          |          |          |          |      |          |          |          |          |          |     |          |          |          |          |          |      |          |          |          |          |          |  |   |   |   |   |  |      |          |  |  |  |  |      |          |          |  |  |  |     |          |          |          |  |  |      |          |          |          |          |  |
| 6 Ru                                                                                                                                 | 0.000000                                                                                                                                                                                                                                                                                                                                                                                                                                                                                                                                                                                                                                                                                                                                                                                                                                                                                                                                                                                                                                                                                                                                                                                                                                                                                                                                                                                                                                                                                         |          |          |          |          |   |   |     |          |  |  |  |  |      |          |          |  |  |  |     |          |          |          |  |  |      |          |          |          |          |  |     |          |          |          |          |          |      |          |          |          |          |          |      |          |          |          |          |          |     |          |          |          |          |          |      |          |          |          |          |          |  |   |   |   |   |  |      |          |  |  |  |  |      |          |          |  |  |  |     |          |          |          |  |  |      |          |          |          |          |  |
| 7 B                                                                                                                                  | 1.991818                                                                                                                                                                                                                                                                                                                                                                                                                                                                                                                                                                                                                                                                                                                                                                                                                                                                                                                                                                                                                                                                                                                                                                                                                                                                                                                                                                                                                                                                                         | 0.000000 |          |          |          |   |   |     |          |  |  |  |  |      |          |          |  |  |  |     |          |          |          |  |  |      |          |          |          |          |  |     |          |          |          |          |          |      |          |          |          |          |          |      |          |          |          |          |          |     |          |          |          |          |          |      |          |          |          |          |          |  |   |   |   |   |  |      |          |  |  |  |  |      |          |          |  |  |  |     |          |          |          |  |  |      |          |          |          |          |  |
| 8 B                                                                                                                                  | 2.489169                                                                                                                                                                                                                                                                                                                                                                                                                                                                                                                                                                                                                                                                                                                                                                                                                                                                                                                                                                                                                                                                                                                                                                                                                                                                                                                                                                                                                                                                                         | 1.814270 | 0.000000 |          |          |   |   |     |          |  |  |  |  |      |          |          |  |  |  |     |          |          |          |  |  |      |          |          |          |          |  |     |          |          |          |          |          |      |          |          |          |          |          |      |          |          |          |          |          |     |          |          |          |          |          |      |          |          |          |          |          |  |   |   |   |   |  |      |          |  |  |  |  |      |          |          |  |  |  |     |          |          |          |  |  |      |          |          |          |          |  |
| 9 Ru                                                                                                                                 | 3.619158                                                                                                                                                                                                                                                                                                                                                                                                                                                                                                                                                                                                                                                                                                                                                                                                                                                                                                                                                                                                                                                                                                                                                                                                                                                                                                                                                                                                                                                                                         | 1.908902 | 2.225898 | 0.000000 |          |   |   |     |          |  |  |  |  |      |          |          |  |  |  |     |          |          |          |  |  |      |          |          |          |          |  |     |          |          |          |          |          |      |          |          |          |          |          |      |          |          |          |          |          |     |          |          |          |          |          |      |          |          |          |          |          |  |   |   |   |   |  |      |          |  |  |  |  |      |          |          |  |  |  |     |          |          |          |  |  |      |          |          |          |          |  |

| 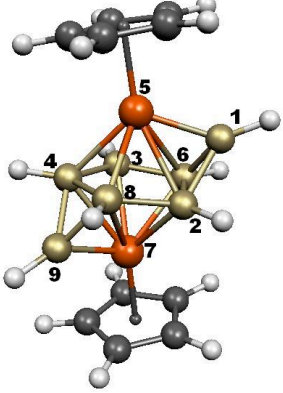 <p>4. -755.20352898 +22.3 C<sub>2</sub></p>  | <table border="1"> <thead> <tr> <th></th> <th>1</th> <th>2</th> <th>3</th> <th>4</th> <th>5</th> </tr> </thead> <tbody> <tr><td>1 B</td><td>0.000000</td><td></td><td></td><td></td><td></td></tr> <tr><td>2 B</td><td>1.745606</td><td>0.000000</td><td></td><td></td><td></td></tr> <tr><td>3 B</td><td>3.036062</td><td>2.777810</td><td>0.000000</td><td></td><td></td></tr> <tr><td>4 B</td><td>3.641692</td><td>2.830795</td><td>1.725215</td><td>0.000000</td><td></td></tr> <tr><td>5 Ru</td><td>2.000770</td><td>2.346635</td><td>2.224062</td><td>2.243760</td><td>0.000000</td></tr> <tr><td>6 B</td><td>1.733147</td><td>1.742873</td><td>1.725133</td><td>2.838906</td><td>2.290326</td></tr> <tr><td>7 Ru</td><td>3.545499</td><td>2.205257</td><td>2.224065</td><td>2.290326</td><td>3.425141</td></tr> <tr><td>8 B</td><td>2.998859</td><td>1.759013</td><td>2.777810</td><td>1.742904</td><td>2.205215</td></tr> <tr><td>9 B</td><td>4.440190</td><td>2.998951</td><td>3.036124</td><td>1.733147</td><td>3.545499</td></tr> <tr><td></td><td>6</td><td>7</td><td>8</td><td>9</td><td></td></tr> <tr><td>6 B</td><td>0.000000</td><td></td><td></td><td></td><td></td></tr> <tr><td>7 Ru</td><td>2.243760</td><td>0.000000</td><td></td><td></td><td></td></tr> <tr><td>8 B</td><td>2.830715</td><td>2.346601</td><td>0.000000</td><td></td><td></td></tr> <tr><td>9 B</td><td>3.641692</td><td>2.000770</td><td>1.745664</td><td>0.000000</td><td></td></tr> </tbody> </table> |          | 1        | 2        | 3        | 4 | 5 | 1 B  | 0.000000 |  |  |  |  | 2 B  | 1.745606 | 0.000000 |  |  |  | 3 B | 3.036062 | 2.777810 | 0.000000 |  |  | 4 B  | 3.641692 | 2.830795 | 1.725215 | 0.000000 |  | 5 Ru | 2.000770 | 2.346635 | 2.224062 | 2.243760 | 0.000000 | 6 B | 1.733147 | 1.742873 | 1.725133 | 2.838906 | 2.290326 | 7 Ru | 3.545499 | 2.205257 | 2.224065 | 2.290326 | 3.425141 | 8 B  | 2.998859 | 1.759013 | 2.777810 | 1.742904 | 2.205215 | 9 B  | 4.440190 | 2.998951 | 3.036124 | 1.733147 | 3.545499 |  | 6 | 7 | 8 | 9 |  | 6 B | 0.000000 |  |  |  |  | 7 Ru | 2.243760 | 0.000000 |  |  |  | 8 B  | 2.830715 | 2.346601 | 0.000000 |  |  | 9 B | 3.641692 | 2.000770 | 1.745664 | 0.000000 |  |
|--------------------------------------------------------------------------------------------------------------------------------|-------------------------------------------------------------------------------------------------------------------------------------------------------------------------------------------------------------------------------------------------------------------------------------------------------------------------------------------------------------------------------------------------------------------------------------------------------------------------------------------------------------------------------------------------------------------------------------------------------------------------------------------------------------------------------------------------------------------------------------------------------------------------------------------------------------------------------------------------------------------------------------------------------------------------------------------------------------------------------------------------------------------------------------------------------------------------------------------------------------------------------------------------------------------------------------------------------------------------------------------------------------------------------------------------------------------------------------------------------------------------------------------------------------------------------------------------------------------------------------------------|----------|----------|----------|----------|---|---|------|----------|--|--|--|--|------|----------|----------|--|--|--|-----|----------|----------|----------|--|--|------|----------|----------|----------|----------|--|------|----------|----------|----------|----------|----------|-----|----------|----------|----------|----------|----------|------|----------|----------|----------|----------|----------|------|----------|----------|----------|----------|----------|------|----------|----------|----------|----------|----------|--|---|---|---|---|--|-----|----------|--|--|--|--|------|----------|----------|--|--|--|------|----------|----------|----------|--|--|-----|----------|----------|----------|----------|--|
|                                                                                                                                | 1                                                                                                                                                                                                                                                                                                                                                                                                                                                                                                                                                                                                                                                                                                                                                                                                                                                                                                                                                                                                                                                                                                                                                                                                                                                                                                                                                                                                                                                                                               | 2        | 3        | 4        | 5        |   |   |      |          |  |  |  |  |      |          |          |  |  |  |     |          |          |          |  |  |      |          |          |          |          |  |      |          |          |          |          |          |     |          |          |          |          |          |      |          |          |          |          |          |      |          |          |          |          |          |      |          |          |          |          |          |  |   |   |   |   |  |     |          |  |  |  |  |      |          |          |  |  |  |      |          |          |          |  |  |     |          |          |          |          |  |
| 1 B                                                                                                                            | 0.000000                                                                                                                                                                                                                                                                                                                                                                                                                                                                                                                                                                                                                                                                                                                                                                                                                                                                                                                                                                                                                                                                                                                                                                                                                                                                                                                                                                                                                                                                                        |          |          |          |          |   |   |      |          |  |  |  |  |      |          |          |  |  |  |     |          |          |          |  |  |      |          |          |          |          |  |      |          |          |          |          |          |     |          |          |          |          |          |      |          |          |          |          |          |      |          |          |          |          |          |      |          |          |          |          |          |  |   |   |   |   |  |     |          |  |  |  |  |      |          |          |  |  |  |      |          |          |          |  |  |     |          |          |          |          |  |
| 2 B                                                                                                                            | 1.745606                                                                                                                                                                                                                                                                                                                                                                                                                                                                                                                                                                                                                                                                                                                                                                                                                                                                                                                                                                                                                                                                                                                                                                                                                                                                                                                                                                                                                                                                                        | 0.000000 |          |          |          |   |   |      |          |  |  |  |  |      |          |          |  |  |  |     |          |          |          |  |  |      |          |          |          |          |  |      |          |          |          |          |          |     |          |          |          |          |          |      |          |          |          |          |          |      |          |          |          |          |          |      |          |          |          |          |          |  |   |   |   |   |  |     |          |  |  |  |  |      |          |          |  |  |  |      |          |          |          |  |  |     |          |          |          |          |  |
| 3 B                                                                                                                            | 3.036062                                                                                                                                                                                                                                                                                                                                                                                                                                                                                                                                                                                                                                                                                                                                                                                                                                                                                                                                                                                                                                                                                                                                                                                                                                                                                                                                                                                                                                                                                        | 2.777810 | 0.000000 |          |          |   |   |      |          |  |  |  |  |      |          |          |  |  |  |     |          |          |          |  |  |      |          |          |          |          |  |      |          |          |          |          |          |     |          |          |          |          |          |      |          |          |          |          |          |      |          |          |          |          |          |      |          |          |          |          |          |  |   |   |   |   |  |     |          |  |  |  |  |      |          |          |  |  |  |      |          |          |          |  |  |     |          |          |          |          |  |
| 4 B                                                                                                                            | 3.641692                                                                                                                                                                                                                                                                                                                                                                                                                                                                                                                                                                                                                                                                                                                                                                                                                                                                                                                                                                                                                                                                                                                                                                                                                                                                                                                                                                                                                                                                                        | 2.830795 | 1.725215 | 0.000000 |          |   |   |      |          |  |  |  |  |      |          |          |  |  |  |     |          |          |          |  |  |      |          |          |          |          |  |      |          |          |          |          |          |     |          |          |          |          |          |      |          |          |          |          |          |      |          |          |          |          |          |      |          |          |          |          |          |  |   |   |   |   |  |     |          |  |  |  |  |      |          |          |  |  |  |      |          |          |          |  |  |     |          |          |          |          |  |
| 5 Ru                                                                                                                           | 2.000770                                                                                                                                                                                                                                                                                                                                                                                                                                                                                                                                                                                                                                                                                                                                                                                                                                                                                                                                                                                                                                                                                                                                                                                                                                                                                                                                                                                                                                                                                        | 2.346635 | 2.224062 | 2.243760 | 0.000000 |   |   |      |          |  |  |  |  |      |          |          |  |  |  |     |          |          |          |  |  |      |          |          |          |          |  |      |          |          |          |          |          |     |          |          |          |          |          |      |          |          |          |          |          |      |          |          |          |          |          |      |          |          |          |          |          |  |   |   |   |   |  |     |          |  |  |  |  |      |          |          |  |  |  |      |          |          |          |  |  |     |          |          |          |          |  |
| 6 B                                                                                                                            | 1.733147                                                                                                                                                                                                                                                                                                                                                                                                                                                                                                                                                                                                                                                                                                                                                                                                                                                                                                                                                                                                                                                                                                                                                                                                                                                                                                                                                                                                                                                                                        | 1.742873 | 1.725133 | 2.838906 | 2.290326 |   |   |      |          |  |  |  |  |      |          |          |  |  |  |     |          |          |          |  |  |      |          |          |          |          |  |      |          |          |          |          |          |     |          |          |          |          |          |      |          |          |          |          |          |      |          |          |          |          |          |      |          |          |          |          |          |  |   |   |   |   |  |     |          |  |  |  |  |      |          |          |  |  |  |      |          |          |          |  |  |     |          |          |          |          |  |
| 7 Ru                                                                                                                           | 3.545499                                                                                                                                                                                                                                                                                                                                                                                                                                                                                                                                                                                                                                                                                                                                                                                                                                                                                                                                                                                                                                                                                                                                                                                                                                                                                                                                                                                                                                                                                        | 2.205257 | 2.224065 | 2.290326 | 3.425141 |   |   |      |          |  |  |  |  |      |          |          |  |  |  |     |          |          |          |  |  |      |          |          |          |          |  |      |          |          |          |          |          |     |          |          |          |          |          |      |          |          |          |          |          |      |          |          |          |          |          |      |          |          |          |          |          |  |   |   |   |   |  |     |          |  |  |  |  |      |          |          |  |  |  |      |          |          |          |  |  |     |          |          |          |          |  |
| 8 B                                                                                                                            | 2.998859                                                                                                                                                                                                                                                                                                                                                                                                                                                                                                                                                                                                                                                                                                                                                                                                                                                                                                                                                                                                                                                                                                                                                                                                                                                                                                                                                                                                                                                                                        | 1.759013 | 2.777810 | 1.742904 | 2.205215 |   |   |      |          |  |  |  |  |      |          |          |  |  |  |     |          |          |          |  |  |      |          |          |          |          |  |      |          |          |          |          |          |     |          |          |          |          |          |      |          |          |          |          |          |      |          |          |          |          |          |      |          |          |          |          |          |  |   |   |   |   |  |     |          |  |  |  |  |      |          |          |  |  |  |      |          |          |          |  |  |     |          |          |          |          |  |
| 9 B                                                                                                                            | 4.440190                                                                                                                                                                                                                                                                                                                                                                                                                                                                                                                                                                                                                                                                                                                                                                                                                                                                                                                                                                                                                                                                                                                                                                                                                                                                                                                                                                                                                                                                                        | 2.998951 | 3.036124 | 1.733147 | 3.545499 |   |   |      |          |  |  |  |  |      |          |          |  |  |  |     |          |          |          |  |  |      |          |          |          |          |  |      |          |          |          |          |          |     |          |          |          |          |          |      |          |          |          |          |          |      |          |          |          |          |          |      |          |          |          |          |          |  |   |   |   |   |  |     |          |  |  |  |  |      |          |          |  |  |  |      |          |          |          |  |  |     |          |          |          |          |  |
|                                                                                                                                | 6                                                                                                                                                                                                                                                                                                                                                                                                                                                                                                                                                                                                                                                                                                                                                                                                                                                                                                                                                                                                                                                                                                                                                                                                                                                                                                                                                                                                                                                                                               | 7        | 8        | 9        |          |   |   |      |          |  |  |  |  |      |          |          |  |  |  |     |          |          |          |  |  |      |          |          |          |          |  |      |          |          |          |          |          |     |          |          |          |          |          |      |          |          |          |          |          |      |          |          |          |          |          |      |          |          |          |          |          |  |   |   |   |   |  |     |          |  |  |  |  |      |          |          |  |  |  |      |          |          |          |  |  |     |          |          |          |          |  |
| 6 B                                                                                                                            | 0.000000                                                                                                                                                                                                                                                                                                                                                                                                                                                                                                                                                                                                                                                                                                                                                                                                                                                                                                                                                                                                                                                                                                                                                                                                                                                                                                                                                                                                                                                                                        |          |          |          |          |   |   |      |          |  |  |  |  |      |          |          |  |  |  |     |          |          |          |  |  |      |          |          |          |          |  |      |          |          |          |          |          |     |          |          |          |          |          |      |          |          |          |          |          |      |          |          |          |          |          |      |          |          |          |          |          |  |   |   |   |   |  |     |          |  |  |  |  |      |          |          |  |  |  |      |          |          |          |  |  |     |          |          |          |          |  |
| 7 Ru                                                                                                                           | 2.243760                                                                                                                                                                                                                                                                                                                                                                                                                                                                                                                                                                                                                                                                                                                                                                                                                                                                                                                                                                                                                                                                                                                                                                                                                                                                                                                                                                                                                                                                                        | 0.000000 |          |          |          |   |   |      |          |  |  |  |  |      |          |          |  |  |  |     |          |          |          |  |  |      |          |          |          |          |  |      |          |          |          |          |          |     |          |          |          |          |          |      |          |          |          |          |          |      |          |          |          |          |          |      |          |          |          |          |          |  |   |   |   |   |  |     |          |  |  |  |  |      |          |          |  |  |  |      |          |          |          |  |  |     |          |          |          |          |  |
| 8 B                                                                                                                            | 2.830715                                                                                                                                                                                                                                                                                                                                                                                                                                                                                                                                                                                                                                                                                                                                                                                                                                                                                                                                                                                                                                                                                                                                                                                                                                                                                                                                                                                                                                                                                        | 2.346601 | 0.000000 |          |          |   |   |      |          |  |  |  |  |      |          |          |  |  |  |     |          |          |          |  |  |      |          |          |          |          |  |      |          |          |          |          |          |     |          |          |          |          |          |      |          |          |          |          |          |      |          |          |          |          |          |      |          |          |          |          |          |  |   |   |   |   |  |     |          |  |  |  |  |      |          |          |  |  |  |      |          |          |          |  |  |     |          |          |          |          |  |
| 9 B                                                                                                                            | 3.641692                                                                                                                                                                                                                                                                                                                                                                                                                                                                                                                                                                                                                                                                                                                                                                                                                                                                                                                                                                                                                                                                                                                                                                                                                                                                                                                                                                                                                                                                                        | 2.000770 | 1.745664 | 0.000000 |          |   |   |      |          |  |  |  |  |      |          |          |  |  |  |     |          |          |          |  |  |      |          |          |          |          |  |      |          |          |          |          |          |     |          |          |          |          |          |      |          |          |          |          |          |      |          |          |          |          |          |      |          |          |          |          |          |  |   |   |   |   |  |     |          |  |  |  |  |      |          |          |  |  |  |      |          |          |          |  |  |     |          |          |          |          |  |
|  <p>5. -755.20230649 +24.6 C<sub>2v</sub></p> | <table border="1"> <thead> <tr> <th></th> <th>1</th> <th>2</th> <th>3</th> <th>4</th> <th>5</th> </tr> </thead> <tbody> <tr><td>1 B</td><td>0.000000</td><td></td><td></td><td></td><td></td></tr> <tr><td>2 B</td><td>2.320115</td><td>0.000000</td><td></td><td></td><td></td></tr> <tr><td>3 B</td><td>1.803010</td><td>1.803151</td><td>0.000000</td><td></td><td></td></tr> <tr><td>4 B</td><td>1.890528</td><td>1.893965</td><td>1.641268</td><td>0.000000</td><td></td></tr> <tr><td>5 Ru</td><td>2.353559</td><td>2.349298</td><td>3.212568</td><td>2.057325</td><td>0.000000</td></tr> <tr><td>6 B</td><td>3.223973</td><td>1.816182</td><td>3.509350</td><td>3.101272</td><td>2.056511</td></tr> <tr><td>7 B</td><td>1.816223</td><td>3.224029</td><td>3.509303</td><td>3.095175</td><td>2.058051</td></tr> <tr><td>8 Ru</td><td>2.349379</td><td>2.353609</td><td>3.212659</td><td>3.437598</td><td>2.708400</td></tr> <tr><td>9 B</td><td>1.893876</td><td>1.890616</td><td>1.641268</td><td>2.800243</td><td>3.437538</td></tr> <tr><td></td><td>6</td><td>7</td><td>8</td><td>9</td><td></td></tr> <tr><td>6 B</td><td>0.000000</td><td></td><td></td><td></td><td></td></tr> <tr><td>7 B</td><td>3.058302</td><td>0.000000</td><td></td><td></td><td></td></tr> <tr><td>8 Ru</td><td>2.057977</td><td>2.056562</td><td>0.000000</td><td></td><td></td></tr> <tr><td>9 B</td><td>3.095200</td><td>3.101248</td><td>2.057425</td><td>0.000000</td><td></td></tr> </tbody> </table> |          | 1        | 2        | 3        | 4 | 5 | 1 B  | 0.000000 |  |  |  |  | 2 B  | 2.320115 | 0.000000 |  |  |  | 3 B | 1.803010 | 1.803151 | 0.000000 |  |  | 4 B  | 1.890528 | 1.893965 | 1.641268 | 0.000000 |  | 5 Ru | 2.353559 | 2.349298 | 3.212568 | 2.057325 | 0.000000 | 6 B | 3.223973 | 1.816182 | 3.509350 | 3.101272 | 2.056511 | 7 B  | 1.816223 | 3.224029 | 3.509303 | 3.095175 | 2.058051 | 8 Ru | 2.349379 | 2.353609 | 3.212659 | 3.437598 | 2.708400 | 9 B  | 1.893876 | 1.890616 | 1.641268 | 2.800243 | 3.437538 |  | 6 | 7 | 8 | 9 |  | 6 B | 0.000000 |  |  |  |  | 7 B  | 3.058302 | 0.000000 |  |  |  | 8 Ru | 2.057977 | 2.056562 | 0.000000 |  |  | 9 B | 3.095200 | 3.101248 | 2.057425 | 0.000000 |  |
|                                                                                                                                | 1                                                                                                                                                                                                                                                                                                                                                                                                                                                                                                                                                                                                                                                                                                                                                                                                                                                                                                                                                                                                                                                                                                                                                                                                                                                                                                                                                                                                                                                                                               | 2        | 3        | 4        | 5        |   |   |      |          |  |  |  |  |      |          |          |  |  |  |     |          |          |          |  |  |      |          |          |          |          |  |      |          |          |          |          |          |     |          |          |          |          |          |      |          |          |          |          |          |      |          |          |          |          |          |      |          |          |          |          |          |  |   |   |   |   |  |     |          |  |  |  |  |      |          |          |  |  |  |      |          |          |          |  |  |     |          |          |          |          |  |
| 1 B                                                                                                                            | 0.000000                                                                                                                                                                                                                                                                                                                                                                                                                                                                                                                                                                                                                                                                                                                                                                                                                                                                                                                                                                                                                                                                                                                                                                                                                                                                                                                                                                                                                                                                                        |          |          |          |          |   |   |      |          |  |  |  |  |      |          |          |  |  |  |     |          |          |          |  |  |      |          |          |          |          |  |      |          |          |          |          |          |     |          |          |          |          |          |      |          |          |          |          |          |      |          |          |          |          |          |      |          |          |          |          |          |  |   |   |   |   |  |     |          |  |  |  |  |      |          |          |  |  |  |      |          |          |          |  |  |     |          |          |          |          |  |
| 2 B                                                                                                                            | 2.320115                                                                                                                                                                                                                                                                                                                                                                                                                                                                                                                                                                                                                                                                                                                                                                                                                                                                                                                                                                                                                                                                                                                                                                                                                                                                                                                                                                                                                                                                                        | 0.000000 |          |          |          |   |   |      |          |  |  |  |  |      |          |          |  |  |  |     |          |          |          |  |  |      |          |          |          |          |  |      |          |          |          |          |          |     |          |          |          |          |          |      |          |          |          |          |          |      |          |          |          |          |          |      |          |          |          |          |          |  |   |   |   |   |  |     |          |  |  |  |  |      |          |          |  |  |  |      |          |          |          |  |  |     |          |          |          |          |  |
| 3 B                                                                                                                            | 1.803010                                                                                                                                                                                                                                                                                                                                                                                                                                                                                                                                                                                                                                                                                                                                                                                                                                                                                                                                                                                                                                                                                                                                                                                                                                                                                                                                                                                                                                                                                        | 1.803151 | 0.000000 |          |          |   |   |      |          |  |  |  |  |      |          |          |  |  |  |     |          |          |          |  |  |      |          |          |          |          |  |      |          |          |          |          |          |     |          |          |          |          |          |      |          |          |          |          |          |      |          |          |          |          |          |      |          |          |          |          |          |  |   |   |   |   |  |     |          |  |  |  |  |      |          |          |  |  |  |      |          |          |          |  |  |     |          |          |          |          |  |
| 4 B                                                                                                                            | 1.890528                                                                                                                                                                                                                                                                                                                                                                                                                                                                                                                                                                                                                                                                                                                                                                                                                                                                                                                                                                                                                                                                                                                                                                                                                                                                                                                                                                                                                                                                                        | 1.893965 | 1.641268 | 0.000000 |          |   |   |      |          |  |  |  |  |      |          |          |  |  |  |     |          |          |          |  |  |      |          |          |          |          |  |      |          |          |          |          |          |     |          |          |          |          |          |      |          |          |          |          |          |      |          |          |          |          |          |      |          |          |          |          |          |  |   |   |   |   |  |     |          |  |  |  |  |      |          |          |  |  |  |      |          |          |          |  |  |     |          |          |          |          |  |
| 5 Ru                                                                                                                           | 2.353559                                                                                                                                                                                                                                                                                                                                                                                                                                                                                                                                                                                                                                                                                                                                                                                                                                                                                                                                                                                                                                                                                                                                                                                                                                                                                                                                                                                                                                                                                        | 2.349298 | 3.212568 | 2.057325 | 0.000000 |   |   |      |          |  |  |  |  |      |          |          |  |  |  |     |          |          |          |  |  |      |          |          |          |          |  |      |          |          |          |          |          |     |          |          |          |          |          |      |          |          |          |          |          |      |          |          |          |          |          |      |          |          |          |          |          |  |   |   |   |   |  |     |          |  |  |  |  |      |          |          |  |  |  |      |          |          |          |  |  |     |          |          |          |          |  |
| 6 B                                                                                                                            | 3.223973                                                                                                                                                                                                                                                                                                                                                                                                                                                                                                                                                                                                                                                                                                                                                                                                                                                                                                                                                                                                                                                                                                                                                                                                                                                                                                                                                                                                                                                                                        | 1.816182 | 3.509350 | 3.101272 | 2.056511 |   |   |      |          |  |  |  |  |      |          |          |  |  |  |     |          |          |          |  |  |      |          |          |          |          |  |      |          |          |          |          |          |     |          |          |          |          |          |      |          |          |          |          |          |      |          |          |          |          |          |      |          |          |          |          |          |  |   |   |   |   |  |     |          |  |  |  |  |      |          |          |  |  |  |      |          |          |          |  |  |     |          |          |          |          |  |
| 7 B                                                                                                                            | 1.816223                                                                                                                                                                                                                                                                                                                                                                                                                                                                                                                                                                                                                                                                                                                                                                                                                                                                                                                                                                                                                                                                                                                                                                                                                                                                                                                                                                                                                                                                                        | 3.224029 | 3.509303 | 3.095175 | 2.058051 |   |   |      |          |  |  |  |  |      |          |          |  |  |  |     |          |          |          |  |  |      |          |          |          |          |  |      |          |          |          |          |          |     |          |          |          |          |          |      |          |          |          |          |          |      |          |          |          |          |          |      |          |          |          |          |          |  |   |   |   |   |  |     |          |  |  |  |  |      |          |          |  |  |  |      |          |          |          |  |  |     |          |          |          |          |  |
| 8 Ru                                                                                                                           | 2.349379                                                                                                                                                                                                                                                                                                                                                                                                                                                                                                                                                                                                                                                                                                                                                                                                                                                                                                                                                                                                                                                                                                                                                                                                                                                                                                                                                                                                                                                                                        | 2.353609 | 3.212659 | 3.437598 | 2.708400 |   |   |      |          |  |  |  |  |      |          |          |  |  |  |     |          |          |          |  |  |      |          |          |          |          |  |      |          |          |          |          |          |     |          |          |          |          |          |      |          |          |          |          |          |      |          |          |          |          |          |      |          |          |          |          |          |  |   |   |   |   |  |     |          |  |  |  |  |      |          |          |  |  |  |      |          |          |          |  |  |     |          |          |          |          |  |
| 9 B                                                                                                                            | 1.893876                                                                                                                                                                                                                                                                                                                                                                                                                                                                                                                                                                                                                                                                                                                                                                                                                                                                                                                                                                                                                                                                                                                                                                                                                                                                                                                                                                                                                                                                                        | 1.890616 | 1.641268 | 2.800243 | 3.437538 |   |   |      |          |  |  |  |  |      |          |          |  |  |  |     |          |          |          |  |  |      |          |          |          |          |  |      |          |          |          |          |          |     |          |          |          |          |          |      |          |          |          |          |          |      |          |          |          |          |          |      |          |          |          |          |          |  |   |   |   |   |  |     |          |  |  |  |  |      |          |          |  |  |  |      |          |          |          |  |  |     |          |          |          |          |  |
|                                                                                                                                | 6                                                                                                                                                                                                                                                                                                                                                                                                                                                                                                                                                                                                                                                                                                                                                                                                                                                                                                                                                                                                                                                                                                                                                                                                                                                                                                                                                                                                                                                                                               | 7        | 8        | 9        |          |   |   |      |          |  |  |  |  |      |          |          |  |  |  |     |          |          |          |  |  |      |          |          |          |          |  |      |          |          |          |          |          |     |          |          |          |          |          |      |          |          |          |          |          |      |          |          |          |          |          |      |          |          |          |          |          |  |   |   |   |   |  |     |          |  |  |  |  |      |          |          |  |  |  |      |          |          |          |  |  |     |          |          |          |          |  |
| 6 B                                                                                                                            | 0.000000                                                                                                                                                                                                                                                                                                                                                                                                                                                                                                                                                                                                                                                                                                                                                                                                                                                                                                                                                                                                                                                                                                                                                                                                                                                                                                                                                                                                                                                                                        |          |          |          |          |   |   |      |          |  |  |  |  |      |          |          |  |  |  |     |          |          |          |  |  |      |          |          |          |          |  |      |          |          |          |          |          |     |          |          |          |          |          |      |          |          |          |          |          |      |          |          |          |          |          |      |          |          |          |          |          |  |   |   |   |   |  |     |          |  |  |  |  |      |          |          |  |  |  |      |          |          |          |  |  |     |          |          |          |          |  |
| 7 B                                                                                                                            | 3.058302                                                                                                                                                                                                                                                                                                                                                                                                                                                                                                                                                                                                                                                                                                                                                                                                                                                                                                                                                                                                                                                                                                                                                                                                                                                                                                                                                                                                                                                                                        | 0.000000 |          |          |          |   |   |      |          |  |  |  |  |      |          |          |  |  |  |     |          |          |          |  |  |      |          |          |          |          |  |      |          |          |          |          |          |     |          |          |          |          |          |      |          |          |          |          |          |      |          |          |          |          |          |      |          |          |          |          |          |  |   |   |   |   |  |     |          |  |  |  |  |      |          |          |  |  |  |      |          |          |          |  |  |     |          |          |          |          |  |
| 8 Ru                                                                                                                           | 2.057977                                                                                                                                                                                                                                                                                                                                                                                                                                                                                                                                                                                                                                                                                                                                                                                                                                                                                                                                                                                                                                                                                                                                                                                                                                                                                                                                                                                                                                                                                        | 2.056562 | 0.000000 |          |          |   |   |      |          |  |  |  |  |      |          |          |  |  |  |     |          |          |          |  |  |      |          |          |          |          |  |      |          |          |          |          |          |     |          |          |          |          |          |      |          |          |          |          |          |      |          |          |          |          |          |      |          |          |          |          |          |  |   |   |   |   |  |     |          |  |  |  |  |      |          |          |  |  |  |      |          |          |          |  |  |     |          |          |          |          |  |
| 9 B                                                                                                                            | 3.095200                                                                                                                                                                                                                                                                                                                                                                                                                                                                                                                                                                                                                                                                                                                                                                                                                                                                                                                                                                                                                                                                                                                                                                                                                                                                                                                                                                                                                                                                                        | 3.101248 | 2.057425 | 0.000000 |          |   |   |      |          |  |  |  |  |      |          |          |  |  |  |     |          |          |          |  |  |      |          |          |          |          |  |      |          |          |          |          |          |     |          |          |          |          |          |      |          |          |          |          |          |      |          |          |          |          |          |      |          |          |          |          |          |  |   |   |   |   |  |     |          |  |  |  |  |      |          |          |  |  |  |      |          |          |          |  |  |     |          |          |          |          |  |
|  <p>6. -755.19955932 +24.8</p>              | <table border="1"> <thead> <tr> <th></th> <th>1</th> <th>2</th> <th>3</th> <th>4</th> <th>5</th> </tr> </thead> <tbody> <tr><td>1 Ru</td><td>0.000000</td><td></td><td></td><td></td><td></td></tr> <tr><td>2 Ru</td><td>3.482254</td><td>0.000000</td><td></td><td></td><td></td></tr> <tr><td>3 B</td><td>2.372153</td><td>2.339391</td><td>0.000000</td><td></td><td></td></tr> <tr><td>4 B</td><td>2.169675</td><td>2.100775</td><td>1.809324</td><td>0.000000</td><td></td></tr> <tr><td>5 B</td><td>2.149876</td><td>2.010931</td><td>2.723248</td><td>1.778143</td><td>0.000000</td></tr> <tr><td>6 B</td><td>2.048940</td><td>3.512042</td><td>3.693128</td><td>3.074616</td><td>1.637853</td></tr> <tr><td>7 B</td><td>2.360697</td><td>2.405244</td><td>2.555056</td><td>2.861847</td><td>1.804726</td></tr> <tr><td>8 B</td><td>2.100561</td><td>3.206025</td><td>1.756929</td><td>2.985798</td><td>2.952859</td></tr> <tr><td>9 B</td><td>3.220190</td><td>2.057701</td><td>1.759854</td><td>2.955370</td><td>2.880229</td></tr> <tr><td></td><td>6</td><td>7</td><td>8</td><td>9</td><td></td></tr> <tr><td>6 B</td><td>0.000000</td><td></td><td></td><td></td><td></td></tr> <tr><td>7 B</td><td>2.009087</td><td>0.000000</td><td></td><td></td><td></td></tr> <tr><td>8 B</td><td>3.145435</td><td>1.815107</td><td>0.000000</td><td></td><td></td></tr> <tr><td>9 B</td><td>3.705716</td><td>1.826420</td><td>1.723766</td><td>0.000000</td><td></td></tr> </tbody> </table>  |          | 1        | 2        | 3        | 4 | 5 | 1 Ru | 0.000000 |  |  |  |  | 2 Ru | 3.482254 | 0.000000 |  |  |  | 3 B | 2.372153 | 2.339391 | 0.000000 |  |  | 4 B  | 2.169675 | 2.100775 | 1.809324 | 0.000000 |  | 5 B  | 2.149876 | 2.010931 | 2.723248 | 1.778143 | 0.000000 | 6 B | 2.048940 | 3.512042 | 3.693128 | 3.074616 | 1.637853 | 7 B  | 2.360697 | 2.405244 | 2.555056 | 2.861847 | 1.804726 | 8 B  | 2.100561 | 3.206025 | 1.756929 | 2.985798 | 2.952859 | 9 B  | 3.220190 | 2.057701 | 1.759854 | 2.955370 | 2.880229 |  | 6 | 7 | 8 | 9 |  | 6 B | 0.000000 |  |  |  |  | 7 B  | 2.009087 | 0.000000 |  |  |  | 8 B  | 3.145435 | 1.815107 | 0.000000 |  |  | 9 B | 3.705716 | 1.826420 | 1.723766 | 0.000000 |  |
|                                                                                                                                | 1                                                                                                                                                                                                                                                                                                                                                                                                                                                                                                                                                                                                                                                                                                                                                                                                                                                                                                                                                                                                                                                                                                                                                                                                                                                                                                                                                                                                                                                                                               | 2        | 3        | 4        | 5        |   |   |      |          |  |  |  |  |      |          |          |  |  |  |     |          |          |          |  |  |      |          |          |          |          |  |      |          |          |          |          |          |     |          |          |          |          |          |      |          |          |          |          |          |      |          |          |          |          |          |      |          |          |          |          |          |  |   |   |   |   |  |     |          |  |  |  |  |      |          |          |  |  |  |      |          |          |          |  |  |     |          |          |          |          |  |
| 1 Ru                                                                                                                           | 0.000000                                                                                                                                                                                                                                                                                                                                                                                                                                                                                                                                                                                                                                                                                                                                                                                                                                                                                                                                                                                                                                                                                                                                                                                                                                                                                                                                                                                                                                                                                        |          |          |          |          |   |   |      |          |  |  |  |  |      |          |          |  |  |  |     |          |          |          |  |  |      |          |          |          |          |  |      |          |          |          |          |          |     |          |          |          |          |          |      |          |          |          |          |          |      |          |          |          |          |          |      |          |          |          |          |          |  |   |   |   |   |  |     |          |  |  |  |  |      |          |          |  |  |  |      |          |          |          |  |  |     |          |          |          |          |  |
| 2 Ru                                                                                                                           | 3.482254                                                                                                                                                                                                                                                                                                                                                                                                                                                                                                                                                                                                                                                                                                                                                                                                                                                                                                                                                                                                                                                                                                                                                                                                                                                                                                                                                                                                                                                                                        | 0.000000 |          |          |          |   |   |      |          |  |  |  |  |      |          |          |  |  |  |     |          |          |          |  |  |      |          |          |          |          |  |      |          |          |          |          |          |     |          |          |          |          |          |      |          |          |          |          |          |      |          |          |          |          |          |      |          |          |          |          |          |  |   |   |   |   |  |     |          |  |  |  |  |      |          |          |  |  |  |      |          |          |          |  |  |     |          |          |          |          |  |
| 3 B                                                                                                                            | 2.372153                                                                                                                                                                                                                                                                                                                                                                                                                                                                                                                                                                                                                                                                                                                                                                                                                                                                                                                                                                                                                                                                                                                                                                                                                                                                                                                                                                                                                                                                                        | 2.339391 | 0.000000 |          |          |   |   |      |          |  |  |  |  |      |          |          |  |  |  |     |          |          |          |  |  |      |          |          |          |          |  |      |          |          |          |          |          |     |          |          |          |          |          |      |          |          |          |          |          |      |          |          |          |          |          |      |          |          |          |          |          |  |   |   |   |   |  |     |          |  |  |  |  |      |          |          |  |  |  |      |          |          |          |  |  |     |          |          |          |          |  |
| 4 B                                                                                                                            | 2.169675                                                                                                                                                                                                                                                                                                                                                                                                                                                                                                                                                                                                                                                                                                                                                                                                                                                                                                                                                                                                                                                                                                                                                                                                                                                                                                                                                                                                                                                                                        | 2.100775 | 1.809324 | 0.000000 |          |   |   |      |          |  |  |  |  |      |          |          |  |  |  |     |          |          |          |  |  |      |          |          |          |          |  |      |          |          |          |          |          |     |          |          |          |          |          |      |          |          |          |          |          |      |          |          |          |          |          |      |          |          |          |          |          |  |   |   |   |   |  |     |          |  |  |  |  |      |          |          |  |  |  |      |          |          |          |  |  |     |          |          |          |          |  |
| 5 B                                                                                                                            | 2.149876                                                                                                                                                                                                                                                                                                                                                                                                                                                                                                                                                                                                                                                                                                                                                                                                                                                                                                                                                                                                                                                                                                                                                                                                                                                                                                                                                                                                                                                                                        | 2.010931 | 2.723248 | 1.778143 | 0.000000 |   |   |      |          |  |  |  |  |      |          |          |  |  |  |     |          |          |          |  |  |      |          |          |          |          |  |      |          |          |          |          |          |     |          |          |          |          |          |      |          |          |          |          |          |      |          |          |          |          |          |      |          |          |          |          |          |  |   |   |   |   |  |     |          |  |  |  |  |      |          |          |  |  |  |      |          |          |          |  |  |     |          |          |          |          |  |
| 6 B                                                                                                                            | 2.048940                                                                                                                                                                                                                                                                                                                                                                                                                                                                                                                                                                                                                                                                                                                                                                                                                                                                                                                                                                                                                                                                                                                                                                                                                                                                                                                                                                                                                                                                                        | 3.512042 | 3.693128 | 3.074616 | 1.637853 |   |   |      |          |  |  |  |  |      |          |          |  |  |  |     |          |          |          |  |  |      |          |          |          |          |  |      |          |          |          |          |          |     |          |          |          |          |          |      |          |          |          |          |          |      |          |          |          |          |          |      |          |          |          |          |          |  |   |   |   |   |  |     |          |  |  |  |  |      |          |          |  |  |  |      |          |          |          |  |  |     |          |          |          |          |  |
| 7 B                                                                                                                            | 2.360697                                                                                                                                                                                                                                                                                                                                                                                                                                                                                                                                                                                                                                                                                                                                                                                                                                                                                                                                                                                                                                                                                                                                                                                                                                                                                                                                                                                                                                                                                        | 2.405244 | 2.555056 | 2.861847 | 1.804726 |   |   |      |          |  |  |  |  |      |          |          |  |  |  |     |          |          |          |  |  |      |          |          |          |          |  |      |          |          |          |          |          |     |          |          |          |          |          |      |          |          |          |          |          |      |          |          |          |          |          |      |          |          |          |          |          |  |   |   |   |   |  |     |          |  |  |  |  |      |          |          |  |  |  |      |          |          |          |  |  |     |          |          |          |          |  |
| 8 B                                                                                                                            | 2.100561                                                                                                                                                                                                                                                                                                                                                                                                                                                                                                                                                                                                                                                                                                                                                                                                                                                                                                                                                                                                                                                                                                                                                                                                                                                                                                                                                                                                                                                                                        | 3.206025 | 1.756929 | 2.985798 | 2.952859 |   |   |      |          |  |  |  |  |      |          |          |  |  |  |     |          |          |          |  |  |      |          |          |          |          |  |      |          |          |          |          |          |     |          |          |          |          |          |      |          |          |          |          |          |      |          |          |          |          |          |      |          |          |          |          |          |  |   |   |   |   |  |     |          |  |  |  |  |      |          |          |  |  |  |      |          |          |          |  |  |     |          |          |          |          |  |
| 9 B                                                                                                                            | 3.220190                                                                                                                                                                                                                                                                                                                                                                                                                                                                                                                                                                                                                                                                                                                                                                                                                                                                                                                                                                                                                                                                                                                                                                                                                                                                                                                                                                                                                                                                                        | 2.057701 | 1.759854 | 2.955370 | 2.880229 |   |   |      |          |  |  |  |  |      |          |          |  |  |  |     |          |          |          |  |  |      |          |          |          |          |  |      |          |          |          |          |          |     |          |          |          |          |          |      |          |          |          |          |          |      |          |          |          |          |          |      |          |          |          |          |          |  |   |   |   |   |  |     |          |  |  |  |  |      |          |          |  |  |  |      |          |          |          |  |  |     |          |          |          |          |  |
|                                                                                                                                | 6                                                                                                                                                                                                                                                                                                                                                                                                                                                                                                                                                                                                                                                                                                                                                                                                                                                                                                                                                                                                                                                                                                                                                                                                                                                                                                                                                                                                                                                                                               | 7        | 8        | 9        |          |   |   |      |          |  |  |  |  |      |          |          |  |  |  |     |          |          |          |  |  |      |          |          |          |          |  |      |          |          |          |          |          |     |          |          |          |          |          |      |          |          |          |          |          |      |          |          |          |          |          |      |          |          |          |          |          |  |   |   |   |   |  |     |          |  |  |  |  |      |          |          |  |  |  |      |          |          |          |  |  |     |          |          |          |          |  |
| 6 B                                                                                                                            | 0.000000                                                                                                                                                                                                                                                                                                                                                                                                                                                                                                                                                                                                                                                                                                                                                                                                                                                                                                                                                                                                                                                                                                                                                                                                                                                                                                                                                                                                                                                                                        |          |          |          |          |   |   |      |          |  |  |  |  |      |          |          |  |  |  |     |          |          |          |  |  |      |          |          |          |          |  |      |          |          |          |          |          |     |          |          |          |          |          |      |          |          |          |          |          |      |          |          |          |          |          |      |          |          |          |          |          |  |   |   |   |   |  |     |          |  |  |  |  |      |          |          |  |  |  |      |          |          |          |  |  |     |          |          |          |          |  |
| 7 B                                                                                                                            | 2.009087                                                                                                                                                                                                                                                                                                                                                                                                                                                                                                                                                                                                                                                                                                                                                                                                                                                                                                                                                                                                                                                                                                                                                                                                                                                                                                                                                                                                                                                                                        | 0.000000 |          |          |          |   |   |      |          |  |  |  |  |      |          |          |  |  |  |     |          |          |          |  |  |      |          |          |          |          |  |      |          |          |          |          |          |     |          |          |          |          |          |      |          |          |          |          |          |      |          |          |          |          |          |      |          |          |          |          |          |  |   |   |   |   |  |     |          |  |  |  |  |      |          |          |  |  |  |      |          |          |          |  |  |     |          |          |          |          |  |
| 8 B                                                                                                                            | 3.145435                                                                                                                                                                                                                                                                                                                                                                                                                                                                                                                                                                                                                                                                                                                                                                                                                                                                                                                                                                                                                                                                                                                                                                                                                                                                                                                                                                                                                                                                                        | 1.815107 | 0.000000 |          |          |   |   |      |          |  |  |  |  |      |          |          |  |  |  |     |          |          |          |  |  |      |          |          |          |          |  |      |          |          |          |          |          |     |          |          |          |          |          |      |          |          |          |          |          |      |          |          |          |          |          |      |          |          |          |          |          |  |   |   |   |   |  |     |          |  |  |  |  |      |          |          |  |  |  |      |          |          |          |  |  |     |          |          |          |          |  |
| 9 B                                                                                                                            | 3.705716                                                                                                                                                                                                                                                                                                                                                                                                                                                                                                                                                                                                                                                                                                                                                                                                                                                                                                                                                                                                                                                                                                                                                                                                                                                                                                                                                                                                                                                                                        | 1.826420 | 1.723766 | 0.000000 |          |   |   |      |          |  |  |  |  |      |          |          |  |  |  |     |          |          |          |  |  |      |          |          |          |          |  |      |          |          |          |          |          |     |          |          |          |          |          |      |          |          |          |          |          |      |          |          |          |          |          |      |          |          |          |          |          |  |   |   |   |   |  |     |          |  |  |  |  |      |          |          |  |  |  |      |          |          |          |  |  |     |          |          |          |          |  |
|  <p>7. -755.19717078 +26.3</p>              | <table border="1"> <thead> <tr> <th></th> <th>1</th> <th>2</th> <th>3</th> <th>4</th> <th>5</th> </tr> </thead> <tbody> <tr><td>1 B</td><td>0.000000</td><td></td><td></td><td></td><td></td></tr> <tr><td>2 B</td><td>2.728619</td><td>0.000000</td><td></td><td></td><td></td></tr> <tr><td>3 B</td><td>1.852317</td><td>1.814691</td><td>0.000000</td><td></td><td></td></tr> <tr><td>4 Ru</td><td>2.216379</td><td>2.079799</td><td>2.077800</td><td>0.000000</td><td></td></tr> <tr><td>5 B</td><td>2.435353</td><td>1.787694</td><td>2.828075</td><td>2.391241</td><td>0.000000</td></tr> <tr><td>6 B</td><td>1.814645</td><td>2.964121</td><td>3.079411</td><td>2.018722</td><td>1.831539</td></tr> <tr><td>7 B</td><td>1.817008</td><td>3.024480</td><td>3.124867</td><td>3.183979</td><td>1.733884</td></tr> <tr><td>8 B</td><td>1.638263</td><td>3.646106</td><td>2.837150</td><td>3.788803</td><td>3.155126</td></tr> <tr><td>9 Ru</td><td>2.315286</td><td>2.159859</td><td>2.146182</td><td>3.427805</td><td>2.301608</td></tr> <tr><td></td><td>6</td><td>7</td><td>8</td><td>9</td><td></td></tr> <tr><td>6 B</td><td>0.000000</td><td></td><td></td><td></td><td></td></tr> <tr><td>7 B</td><td>1.771624</td><td>0.000000</td><td></td><td></td><td></td></tr> </tbody> </table>                                                                                                                                                                                                |          | 1        | 2        | 3        | 4 | 5 | 1 B  | 0.000000 |  |  |  |  | 2 B  | 2.728619 | 0.000000 |  |  |  | 3 B | 1.852317 | 1.814691 | 0.000000 |  |  | 4 Ru | 2.216379 | 2.079799 | 2.077800 | 0.000000 |  | 5 B  | 2.435353 | 1.787694 | 2.828075 | 2.391241 | 0.000000 | 6 B | 1.814645 | 2.964121 | 3.079411 | 2.018722 | 1.831539 | 7 B  | 1.817008 | 3.024480 | 3.124867 | 3.183979 | 1.733884 | 8 B  | 1.638263 | 3.646106 | 2.837150 | 3.788803 | 3.155126 | 9 Ru | 2.315286 | 2.159859 | 2.146182 | 3.427805 | 2.301608 |  | 6 | 7 | 8 | 9 |  | 6 B | 0.000000 |  |  |  |  | 7 B  | 1.771624 | 0.000000 |  |  |  |      |          |          |          |  |  |     |          |          |          |          |  |
|                                                                                                                                | 1                                                                                                                                                                                                                                                                                                                                                                                                                                                                                                                                                                                                                                                                                                                                                                                                                                                                                                                                                                                                                                                                                                                                                                                                                                                                                                                                                                                                                                                                                               | 2        | 3        | 4        | 5        |   |   |      |          |  |  |  |  |      |          |          |  |  |  |     |          |          |          |  |  |      |          |          |          |          |  |      |          |          |          |          |          |     |          |          |          |          |          |      |          |          |          |          |          |      |          |          |          |          |          |      |          |          |          |          |          |  |   |   |   |   |  |     |          |  |  |  |  |      |          |          |  |  |  |      |          |          |          |  |  |     |          |          |          |          |  |
| 1 B                                                                                                                            | 0.000000                                                                                                                                                                                                                                                                                                                                                                                                                                                                                                                                                                                                                                                                                                                                                                                                                                                                                                                                                                                                                                                                                                                                                                                                                                                                                                                                                                                                                                                                                        |          |          |          |          |   |   |      |          |  |  |  |  |      |          |          |  |  |  |     |          |          |          |  |  |      |          |          |          |          |  |      |          |          |          |          |          |     |          |          |          |          |          |      |          |          |          |          |          |      |          |          |          |          |          |      |          |          |          |          |          |  |   |   |   |   |  |     |          |  |  |  |  |      |          |          |  |  |  |      |          |          |          |  |  |     |          |          |          |          |  |
| 2 B                                                                                                                            | 2.728619                                                                                                                                                                                                                                                                                                                                                                                                                                                                                                                                                                                                                                                                                                                                                                                                                                                                                                                                                                                                                                                                                                                                                                                                                                                                                                                                                                                                                                                                                        | 0.000000 |          |          |          |   |   |      |          |  |  |  |  |      |          |          |  |  |  |     |          |          |          |  |  |      |          |          |          |          |  |      |          |          |          |          |          |     |          |          |          |          |          |      |          |          |          |          |          |      |          |          |          |          |          |      |          |          |          |          |          |  |   |   |   |   |  |     |          |  |  |  |  |      |          |          |  |  |  |      |          |          |          |  |  |     |          |          |          |          |  |
| 3 B                                                                                                                            | 1.852317                                                                                                                                                                                                                                                                                                                                                                                                                                                                                                                                                                                                                                                                                                                                                                                                                                                                                                                                                                                                                                                                                                                                                                                                                                                                                                                                                                                                                                                                                        | 1.814691 | 0.000000 |          |          |   |   |      |          |  |  |  |  |      |          |          |  |  |  |     |          |          |          |  |  |      |          |          |          |          |  |      |          |          |          |          |          |     |          |          |          |          |          |      |          |          |          |          |          |      |          |          |          |          |          |      |          |          |          |          |          |  |   |   |   |   |  |     |          |  |  |  |  |      |          |          |  |  |  |      |          |          |          |  |  |     |          |          |          |          |  |
| 4 Ru                                                                                                                           | 2.216379                                                                                                                                                                                                                                                                                                                                                                                                                                                                                                                                                                                                                                                                                                                                                                                                                                                                                                                                                                                                                                                                                                                                                                                                                                                                                                                                                                                                                                                                                        | 2.079799 | 2.077800 | 0.000000 |          |   |   |      |          |  |  |  |  |      |          |          |  |  |  |     |          |          |          |  |  |      |          |          |          |          |  |      |          |          |          |          |          |     |          |          |          |          |          |      |          |          |          |          |          |      |          |          |          |          |          |      |          |          |          |          |          |  |   |   |   |   |  |     |          |  |  |  |  |      |          |          |  |  |  |      |          |          |          |  |  |     |          |          |          |          |  |
| 5 B                                                                                                                            | 2.435353                                                                                                                                                                                                                                                                                                                                                                                                                                                                                                                                                                                                                                                                                                                                                                                                                                                                                                                                                                                                                                                                                                                                                                                                                                                                                                                                                                                                                                                                                        | 1.787694 | 2.828075 | 2.391241 | 0.000000 |   |   |      |          |  |  |  |  |      |          |          |  |  |  |     |          |          |          |  |  |      |          |          |          |          |  |      |          |          |          |          |          |     |          |          |          |          |          |      |          |          |          |          |          |      |          |          |          |          |          |      |          |          |          |          |          |  |   |   |   |   |  |     |          |  |  |  |  |      |          |          |  |  |  |      |          |          |          |  |  |     |          |          |          |          |  |
| 6 B                                                                                                                            | 1.814645                                                                                                                                                                                                                                                                                                                                                                                                                                                                                                                                                                                                                                                                                                                                                                                                                                                                                                                                                                                                                                                                                                                                                                                                                                                                                                                                                                                                                                                                                        | 2.964121 | 3.079411 | 2.018722 | 1.831539 |   |   |      |          |  |  |  |  |      |          |          |  |  |  |     |          |          |          |  |  |      |          |          |          |          |  |      |          |          |          |          |          |     |          |          |          |          |          |      |          |          |          |          |          |      |          |          |          |          |          |      |          |          |          |          |          |  |   |   |   |   |  |     |          |  |  |  |  |      |          |          |  |  |  |      |          |          |          |  |  |     |          |          |          |          |  |
| 7 B                                                                                                                            | 1.817008                                                                                                                                                                                                                                                                                                                                                                                                                                                                                                                                                                                                                                                                                                                                                                                                                                                                                                                                                                                                                                                                                                                                                                                                                                                                                                                                                                                                                                                                                        | 3.024480 | 3.124867 | 3.183979 | 1.733884 |   |   |      |          |  |  |  |  |      |          |          |  |  |  |     |          |          |          |  |  |      |          |          |          |          |  |      |          |          |          |          |          |     |          |          |          |          |          |      |          |          |          |          |          |      |          |          |          |          |          |      |          |          |          |          |          |  |   |   |   |   |  |     |          |  |  |  |  |      |          |          |  |  |  |      |          |          |          |  |  |     |          |          |          |          |  |
| 8 B                                                                                                                            | 1.638263                                                                                                                                                                                                                                                                                                                                                                                                                                                                                                                                                                                                                                                                                                                                                                                                                                                                                                                                                                                                                                                                                                                                                                                                                                                                                                                                                                                                                                                                                        | 3.646106 | 2.837150 | 3.788803 | 3.155126 |   |   |      |          |  |  |  |  |      |          |          |  |  |  |     |          |          |          |  |  |      |          |          |          |          |  |      |          |          |          |          |          |     |          |          |          |          |          |      |          |          |          |          |          |      |          |          |          |          |          |      |          |          |          |          |          |  |   |   |   |   |  |     |          |  |  |  |  |      |          |          |  |  |  |      |          |          |          |  |  |     |          |          |          |          |  |
| 9 Ru                                                                                                                           | 2.315286                                                                                                                                                                                                                                                                                                                                                                                                                                                                                                                                                                                                                                                                                                                                                                                                                                                                                                                                                                                                                                                                                                                                                                                                                                                                                                                                                                                                                                                                                        | 2.159859 | 2.146182 | 3.427805 | 2.301608 |   |   |      |          |  |  |  |  |      |          |          |  |  |  |     |          |          |          |  |  |      |          |          |          |          |  |      |          |          |          |          |          |     |          |          |          |          |          |      |          |          |          |          |          |      |          |          |          |          |          |      |          |          |          |          |          |  |   |   |   |   |  |     |          |  |  |  |  |      |          |          |  |  |  |      |          |          |          |  |  |     |          |          |          |          |  |
|                                                                                                                                | 6                                                                                                                                                                                                                                                                                                                                                                                                                                                                                                                                                                                                                                                                                                                                                                                                                                                                                                                                                                                                                                                                                                                                                                                                                                                                                                                                                                                                                                                                                               | 7        | 8        | 9        |          |   |   |      |          |  |  |  |  |      |          |          |  |  |  |     |          |          |          |  |  |      |          |          |          |          |  |      |          |          |          |          |          |     |          |          |          |          |          |      |          |          |          |          |          |      |          |          |          |          |          |      |          |          |          |          |          |  |   |   |   |   |  |     |          |  |  |  |  |      |          |          |  |  |  |      |          |          |          |  |  |     |          |          |          |          |  |
| 6 B                                                                                                                            | 0.000000                                                                                                                                                                                                                                                                                                                                                                                                                                                                                                                                                                                                                                                                                                                                                                                                                                                                                                                                                                                                                                                                                                                                                                                                                                                                                                                                                                                                                                                                                        |          |          |          |          |   |   |      |          |  |  |  |  |      |          |          |  |  |  |     |          |          |          |  |  |      |          |          |          |          |  |      |          |          |          |          |          |     |          |          |          |          |          |      |          |          |          |          |          |      |          |          |          |          |          |      |          |          |          |          |          |  |   |   |   |   |  |     |          |  |  |  |  |      |          |          |  |  |  |      |          |          |          |  |  |     |          |          |          |          |  |
| 7 B                                                                                                                            | 1.771624                                                                                                                                                                                                                                                                                                                                                                                                                                                                                                                                                                                                                                                                                                                                                                                                                                                                                                                                                                                                                                                                                                                                                                                                                                                                                                                                                                                                                                                                                        | 0.000000 |          |          |          |   |   |      |          |  |  |  |  |      |          |          |  |  |  |     |          |          |          |  |  |      |          |          |          |          |  |      |          |          |          |          |          |     |          |          |          |          |          |      |          |          |          |          |          |      |          |          |          |          |          |      |          |          |          |          |          |  |   |   |   |   |  |     |          |  |  |  |  |      |          |          |  |  |  |      |          |          |          |  |  |     |          |          |          |          |  |

|                                                                                                                                 |                                                                                                                                                                                                                                                                                                                                                                                                                                                                                                                                                                                                                                                                                                                                                                                                                                                                                                                                                                                                                                                                                                                                                                                                                                                                                                                                                                                                                                                                                                                                                                                                                                                                                                                      |          |          |          |          |   |   |      |          |          |          |          |  |      |          |          |  |  |  |     |          |          |          |   |   |      |          |          |          |          |  |      |          |          |          |          |          |      |          |          |          |          |          |      |          |          |          |          |          |      |          |          |          |          |          |     |          |          |          |          |          |     |          |          |          |          |          |     |          |          |          |          |          |      |          |          |          |          |          |     |          |          |  |  |  |      |          |          |          |   |  |     |          |          |          |          |  |     |          |          |  |  |  |     |          |          |          |  |  |     |          |          |          |          |  |
|---------------------------------------------------------------------------------------------------------------------------------|----------------------------------------------------------------------------------------------------------------------------------------------------------------------------------------------------------------------------------------------------------------------------------------------------------------------------------------------------------------------------------------------------------------------------------------------------------------------------------------------------------------------------------------------------------------------------------------------------------------------------------------------------------------------------------------------------------------------------------------------------------------------------------------------------------------------------------------------------------------------------------------------------------------------------------------------------------------------------------------------------------------------------------------------------------------------------------------------------------------------------------------------------------------------------------------------------------------------------------------------------------------------------------------------------------------------------------------------------------------------------------------------------------------------------------------------------------------------------------------------------------------------------------------------------------------------------------------------------------------------------------------------------------------------------------------------------------------------|----------|----------|----------|----------|---|---|------|----------|----------|----------|----------|--|------|----------|----------|--|--|--|-----|----------|----------|----------|---|---|------|----------|----------|----------|----------|--|------|----------|----------|----------|----------|----------|------|----------|----------|----------|----------|----------|------|----------|----------|----------|----------|----------|------|----------|----------|----------|----------|----------|-----|----------|----------|----------|----------|----------|-----|----------|----------|----------|----------|----------|-----|----------|----------|----------|----------|----------|------|----------|----------|----------|----------|----------|-----|----------|----------|--|--|--|------|----------|----------|----------|---|--|-----|----------|----------|----------|----------|--|-----|----------|----------|--|--|--|-----|----------|----------|----------|--|--|-----|----------|----------|----------|----------|--|
| 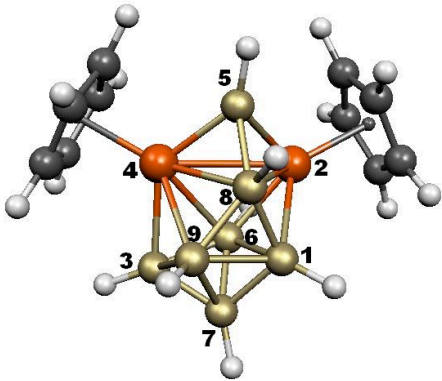 <p>8. -755.19610313 +27.0</p>                 | <table border="0"> <tr><td>8 B</td><td>2.957831</td><td>1.807850</td><td>0.000000</td><td></td><td></td></tr> <tr><td>9 Ru</td><td>3.292077</td><td>2.184625</td><td>2.091260</td><td>0.000000</td><td></td></tr> <tr><td colspan="6"> </td></tr> <tr><td></td><td>1</td><td>2</td><td>3</td><td>4</td><td>5</td></tr> <tr><td>1 B</td><td>0.000000</td><td></td><td></td><td></td><td></td></tr> <tr><td>2 Ru</td><td>2.332040</td><td>0.000000</td><td></td><td></td><td></td></tr> <tr><td>3 B</td><td>2.735783</td><td>3.599606</td><td>0.000000</td><td></td><td></td></tr> <tr><td>4 Ru</td><td>3.145312</td><td>2.878048</td><td>2.183890</td><td>0.000000</td><td></td></tr> <tr><td>5 B</td><td>3.161213</td><td>2.109411</td><td>3.803136</td><td>2.013162</td><td>0.000000</td></tr> <tr><td>6 B</td><td>1.839683</td><td>2.058394</td><td>1.719967</td><td>2.307995</td><td>3.071531</td></tr> <tr><td>7 B</td><td>1.730819</td><td>3.416603</td><td>1.649283</td><td>3.255724</td><td>4.192722</td></tr> <tr><td>8 B</td><td>1.727254</td><td>2.302574</td><td>3.017927</td><td>2.224553</td><td>1.774482</td></tr> <tr><td>9 B</td><td>1.887932</td><td>3.420872</td><td>1.813486</td><td>2.308012</td><td>3.194771</td></tr> <tr><td colspan="6"> </td></tr> <tr><td></td><td>6</td><td>7</td><td>8</td><td>9</td><td></td></tr> <tr><td>6 B</td><td>0.000000</td><td></td><td></td><td></td><td></td></tr> <tr><td>7 B</td><td>1.684401</td><td>0.000000</td><td></td><td></td><td></td></tr> <tr><td>8 B</td><td>2.470989</td><td>2.905028</td><td>0.000000</td><td></td><td></td></tr> <tr><td>9 B</td><td>2.287643</td><td>1.821430</td><td>1.770724</td><td>0.000000</td><td></td></tr> </table> | 8 B      | 2.957831 | 1.807850 | 0.000000 |   |   | 9 Ru | 3.292077 | 2.184625 | 2.091260 | 0.000000 |  |      |          |          |  |  |  |     | 1        | 2        | 3        | 4 | 5 | 1 B  | 0.000000 |          |          |          |  | 2 Ru | 2.332040 | 0.000000 |          |          |          | 3 B  | 2.735783 | 3.599606 | 0.000000 |          |          | 4 Ru | 3.145312 | 2.878048 | 2.183890 | 0.000000 |          | 5 B  | 3.161213 | 2.109411 | 3.803136 | 2.013162 | 0.000000 | 6 B | 1.839683 | 2.058394 | 1.719967 | 2.307995 | 3.071531 | 7 B | 1.730819 | 3.416603 | 1.649283 | 3.255724 | 4.192722 | 8 B | 1.727254 | 2.302574 | 3.017927 | 2.224553 | 1.774482 | 9 B  | 1.887932 | 3.420872 | 1.813486 | 2.308012 | 3.194771 |     |          |          |  |  |  |      | 6        | 7        | 8        | 9 |  | 6 B | 0.000000 |          |          |          |  | 7 B | 1.684401 | 0.000000 |  |  |  | 8 B | 2.470989 | 2.905028 | 0.000000 |  |  | 9 B | 2.287643 | 1.821430 | 1.770724 | 0.000000 |  |
| 8 B                                                                                                                             | 2.957831                                                                                                                                                                                                                                                                                                                                                                                                                                                                                                                                                                                                                                                                                                                                                                                                                                                                                                                                                                                                                                                                                                                                                                                                                                                                                                                                                                                                                                                                                                                                                                                                                                                                                                             | 1.807850 | 0.000000 |          |          |   |   |      |          |          |          |          |  |      |          |          |  |  |  |     |          |          |          |   |   |      |          |          |          |          |  |      |          |          |          |          |          |      |          |          |          |          |          |      |          |          |          |          |          |      |          |          |          |          |          |     |          |          |          |          |          |     |          |          |          |          |          |     |          |          |          |          |          |      |          |          |          |          |          |     |          |          |  |  |  |      |          |          |          |   |  |     |          |          |          |          |  |     |          |          |  |  |  |     |          |          |          |  |  |     |          |          |          |          |  |
| 9 Ru                                                                                                                            | 3.292077                                                                                                                                                                                                                                                                                                                                                                                                                                                                                                                                                                                                                                                                                                                                                                                                                                                                                                                                                                                                                                                                                                                                                                                                                                                                                                                                                                                                                                                                                                                                                                                                                                                                                                             | 2.184625 | 2.091260 | 0.000000 |          |   |   |      |          |          |          |          |  |      |          |          |  |  |  |     |          |          |          |   |   |      |          |          |          |          |  |      |          |          |          |          |          |      |          |          |          |          |          |      |          |          |          |          |          |      |          |          |          |          |          |     |          |          |          |          |          |     |          |          |          |          |          |     |          |          |          |          |          |      |          |          |          |          |          |     |          |          |  |  |  |      |          |          |          |   |  |     |          |          |          |          |  |     |          |          |  |  |  |     |          |          |          |  |  |     |          |          |          |          |  |
|                                                                                                                                 |                                                                                                                                                                                                                                                                                                                                                                                                                                                                                                                                                                                                                                                                                                                                                                                                                                                                                                                                                                                                                                                                                                                                                                                                                                                                                                                                                                                                                                                                                                                                                                                                                                                                                                                      |          |          |          |          |   |   |      |          |          |          |          |  |      |          |          |  |  |  |     |          |          |          |   |   |      |          |          |          |          |  |      |          |          |          |          |          |      |          |          |          |          |          |      |          |          |          |          |          |      |          |          |          |          |          |     |          |          |          |          |          |     |          |          |          |          |          |     |          |          |          |          |          |      |          |          |          |          |          |     |          |          |  |  |  |      |          |          |          |   |  |     |          |          |          |          |  |     |          |          |  |  |  |     |          |          |          |  |  |     |          |          |          |          |  |
|                                                                                                                                 | 1                                                                                                                                                                                                                                                                                                                                                                                                                                                                                                                                                                                                                                                                                                                                                                                                                                                                                                                                                                                                                                                                                                                                                                                                                                                                                                                                                                                                                                                                                                                                                                                                                                                                                                                    | 2        | 3        | 4        | 5        |   |   |      |          |          |          |          |  |      |          |          |  |  |  |     |          |          |          |   |   |      |          |          |          |          |  |      |          |          |          |          |          |      |          |          |          |          |          |      |          |          |          |          |          |      |          |          |          |          |          |     |          |          |          |          |          |     |          |          |          |          |          |     |          |          |          |          |          |      |          |          |          |          |          |     |          |          |  |  |  |      |          |          |          |   |  |     |          |          |          |          |  |     |          |          |  |  |  |     |          |          |          |  |  |     |          |          |          |          |  |
| 1 B                                                                                                                             | 0.000000                                                                                                                                                                                                                                                                                                                                                                                                                                                                                                                                                                                                                                                                                                                                                                                                                                                                                                                                                                                                                                                                                                                                                                                                                                                                                                                                                                                                                                                                                                                                                                                                                                                                                                             |          |          |          |          |   |   |      |          |          |          |          |  |      |          |          |  |  |  |     |          |          |          |   |   |      |          |          |          |          |  |      |          |          |          |          |          |      |          |          |          |          |          |      |          |          |          |          |          |      |          |          |          |          |          |     |          |          |          |          |          |     |          |          |          |          |          |     |          |          |          |          |          |      |          |          |          |          |          |     |          |          |  |  |  |      |          |          |          |   |  |     |          |          |          |          |  |     |          |          |  |  |  |     |          |          |          |  |  |     |          |          |          |          |  |
| 2 Ru                                                                                                                            | 2.332040                                                                                                                                                                                                                                                                                                                                                                                                                                                                                                                                                                                                                                                                                                                                                                                                                                                                                                                                                                                                                                                                                                                                                                                                                                                                                                                                                                                                                                                                                                                                                                                                                                                                                                             | 0.000000 |          |          |          |   |   |      |          |          |          |          |  |      |          |          |  |  |  |     |          |          |          |   |   |      |          |          |          |          |  |      |          |          |          |          |          |      |          |          |          |          |          |      |          |          |          |          |          |      |          |          |          |          |          |     |          |          |          |          |          |     |          |          |          |          |          |     |          |          |          |          |          |      |          |          |          |          |          |     |          |          |  |  |  |      |          |          |          |   |  |     |          |          |          |          |  |     |          |          |  |  |  |     |          |          |          |  |  |     |          |          |          |          |  |
| 3 B                                                                                                                             | 2.735783                                                                                                                                                                                                                                                                                                                                                                                                                                                                                                                                                                                                                                                                                                                                                                                                                                                                                                                                                                                                                                                                                                                                                                                                                                                                                                                                                                                                                                                                                                                                                                                                                                                                                                             | 3.599606 | 0.000000 |          |          |   |   |      |          |          |          |          |  |      |          |          |  |  |  |     |          |          |          |   |   |      |          |          |          |          |  |      |          |          |          |          |          |      |          |          |          |          |          |      |          |          |          |          |          |      |          |          |          |          |          |     |          |          |          |          |          |     |          |          |          |          |          |     |          |          |          |          |          |      |          |          |          |          |          |     |          |          |  |  |  |      |          |          |          |   |  |     |          |          |          |          |  |     |          |          |  |  |  |     |          |          |          |  |  |     |          |          |          |          |  |
| 4 Ru                                                                                                                            | 3.145312                                                                                                                                                                                                                                                                                                                                                                                                                                                                                                                                                                                                                                                                                                                                                                                                                                                                                                                                                                                                                                                                                                                                                                                                                                                                                                                                                                                                                                                                                                                                                                                                                                                                                                             | 2.878048 | 2.183890 | 0.000000 |          |   |   |      |          |          |          |          |  |      |          |          |  |  |  |     |          |          |          |   |   |      |          |          |          |          |  |      |          |          |          |          |          |      |          |          |          |          |          |      |          |          |          |          |          |      |          |          |          |          |          |     |          |          |          |          |          |     |          |          |          |          |          |     |          |          |          |          |          |      |          |          |          |          |          |     |          |          |  |  |  |      |          |          |          |   |  |     |          |          |          |          |  |     |          |          |  |  |  |     |          |          |          |  |  |     |          |          |          |          |  |
| 5 B                                                                                                                             | 3.161213                                                                                                                                                                                                                                                                                                                                                                                                                                                                                                                                                                                                                                                                                                                                                                                                                                                                                                                                                                                                                                                                                                                                                                                                                                                                                                                                                                                                                                                                                                                                                                                                                                                                                                             | 2.109411 | 3.803136 | 2.013162 | 0.000000 |   |   |      |          |          |          |          |  |      |          |          |  |  |  |     |          |          |          |   |   |      |          |          |          |          |  |      |          |          |          |          |          |      |          |          |          |          |          |      |          |          |          |          |          |      |          |          |          |          |          |     |          |          |          |          |          |     |          |          |          |          |          |     |          |          |          |          |          |      |          |          |          |          |          |     |          |          |  |  |  |      |          |          |          |   |  |     |          |          |          |          |  |     |          |          |  |  |  |     |          |          |          |  |  |     |          |          |          |          |  |
| 6 B                                                                                                                             | 1.839683                                                                                                                                                                                                                                                                                                                                                                                                                                                                                                                                                                                                                                                                                                                                                                                                                                                                                                                                                                                                                                                                                                                                                                                                                                                                                                                                                                                                                                                                                                                                                                                                                                                                                                             | 2.058394 | 1.719967 | 2.307995 | 3.071531 |   |   |      |          |          |          |          |  |      |          |          |  |  |  |     |          |          |          |   |   |      |          |          |          |          |  |      |          |          |          |          |          |      |          |          |          |          |          |      |          |          |          |          |          |      |          |          |          |          |          |     |          |          |          |          |          |     |          |          |          |          |          |     |          |          |          |          |          |      |          |          |          |          |          |     |          |          |  |  |  |      |          |          |          |   |  |     |          |          |          |          |  |     |          |          |  |  |  |     |          |          |          |  |  |     |          |          |          |          |  |
| 7 B                                                                                                                             | 1.730819                                                                                                                                                                                                                                                                                                                                                                                                                                                                                                                                                                                                                                                                                                                                                                                                                                                                                                                                                                                                                                                                                                                                                                                                                                                                                                                                                                                                                                                                                                                                                                                                                                                                                                             | 3.416603 | 1.649283 | 3.255724 | 4.192722 |   |   |      |          |          |          |          |  |      |          |          |  |  |  |     |          |          |          |   |   |      |          |          |          |          |  |      |          |          |          |          |          |      |          |          |          |          |          |      |          |          |          |          |          |      |          |          |          |          |          |     |          |          |          |          |          |     |          |          |          |          |          |     |          |          |          |          |          |      |          |          |          |          |          |     |          |          |  |  |  |      |          |          |          |   |  |     |          |          |          |          |  |     |          |          |  |  |  |     |          |          |          |  |  |     |          |          |          |          |  |
| 8 B                                                                                                                             | 1.727254                                                                                                                                                                                                                                                                                                                                                                                                                                                                                                                                                                                                                                                                                                                                                                                                                                                                                                                                                                                                                                                                                                                                                                                                                                                                                                                                                                                                                                                                                                                                                                                                                                                                                                             | 2.302574 | 3.017927 | 2.224553 | 1.774482 |   |   |      |          |          |          |          |  |      |          |          |  |  |  |     |          |          |          |   |   |      |          |          |          |          |  |      |          |          |          |          |          |      |          |          |          |          |          |      |          |          |          |          |          |      |          |          |          |          |          |     |          |          |          |          |          |     |          |          |          |          |          |     |          |          |          |          |          |      |          |          |          |          |          |     |          |          |  |  |  |      |          |          |          |   |  |     |          |          |          |          |  |     |          |          |  |  |  |     |          |          |          |  |  |     |          |          |          |          |  |
| 9 B                                                                                                                             | 1.887932                                                                                                                                                                                                                                                                                                                                                                                                                                                                                                                                                                                                                                                                                                                                                                                                                                                                                                                                                                                                                                                                                                                                                                                                                                                                                                                                                                                                                                                                                                                                                                                                                                                                                                             | 3.420872 | 1.813486 | 2.308012 | 3.194771 |   |   |      |          |          |          |          |  |      |          |          |  |  |  |     |          |          |          |   |   |      |          |          |          |          |  |      |          |          |          |          |          |      |          |          |          |          |          |      |          |          |          |          |          |      |          |          |          |          |          |     |          |          |          |          |          |     |          |          |          |          |          |     |          |          |          |          |          |      |          |          |          |          |          |     |          |          |  |  |  |      |          |          |          |   |  |     |          |          |          |          |  |     |          |          |  |  |  |     |          |          |          |  |  |     |          |          |          |          |  |
|                                                                                                                                 |                                                                                                                                                                                                                                                                                                                                                                                                                                                                                                                                                                                                                                                                                                                                                                                                                                                                                                                                                                                                                                                                                                                                                                                                                                                                                                                                                                                                                                                                                                                                                                                                                                                                                                                      |          |          |          |          |   |   |      |          |          |          |          |  |      |          |          |  |  |  |     |          |          |          |   |   |      |          |          |          |          |  |      |          |          |          |          |          |      |          |          |          |          |          |      |          |          |          |          |          |      |          |          |          |          |          |     |          |          |          |          |          |     |          |          |          |          |          |     |          |          |          |          |          |      |          |          |          |          |          |     |          |          |  |  |  |      |          |          |          |   |  |     |          |          |          |          |  |     |          |          |  |  |  |     |          |          |          |  |  |     |          |          |          |          |  |
|                                                                                                                                 | 6                                                                                                                                                                                                                                                                                                                                                                                                                                                                                                                                                                                                                                                                                                                                                                                                                                                                                                                                                                                                                                                                                                                                                                                                                                                                                                                                                                                                                                                                                                                                                                                                                                                                                                                    | 7        | 8        | 9        |          |   |   |      |          |          |          |          |  |      |          |          |  |  |  |     |          |          |          |   |   |      |          |          |          |          |  |      |          |          |          |          |          |      |          |          |          |          |          |      |          |          |          |          |          |      |          |          |          |          |          |     |          |          |          |          |          |     |          |          |          |          |          |     |          |          |          |          |          |      |          |          |          |          |          |     |          |          |  |  |  |      |          |          |          |   |  |     |          |          |          |          |  |     |          |          |  |  |  |     |          |          |          |  |  |     |          |          |          |          |  |
| 6 B                                                                                                                             | 0.000000                                                                                                                                                                                                                                                                                                                                                                                                                                                                                                                                                                                                                                                                                                                                                                                                                                                                                                                                                                                                                                                                                                                                                                                                                                                                                                                                                                                                                                                                                                                                                                                                                                                                                                             |          |          |          |          |   |   |      |          |          |          |          |  |      |          |          |  |  |  |     |          |          |          |   |   |      |          |          |          |          |  |      |          |          |          |          |          |      |          |          |          |          |          |      |          |          |          |          |          |      |          |          |          |          |          |     |          |          |          |          |          |     |          |          |          |          |          |     |          |          |          |          |          |      |          |          |          |          |          |     |          |          |  |  |  |      |          |          |          |   |  |     |          |          |          |          |  |     |          |          |  |  |  |     |          |          |          |  |  |     |          |          |          |          |  |
| 7 B                                                                                                                             | 1.684401                                                                                                                                                                                                                                                                                                                                                                                                                                                                                                                                                                                                                                                                                                                                                                                                                                                                                                                                                                                                                                                                                                                                                                                                                                                                                                                                                                                                                                                                                                                                                                                                                                                                                                             | 0.000000 |          |          |          |   |   |      |          |          |          |          |  |      |          |          |  |  |  |     |          |          |          |   |   |      |          |          |          |          |  |      |          |          |          |          |          |      |          |          |          |          |          |      |          |          |          |          |          |      |          |          |          |          |          |     |          |          |          |          |          |     |          |          |          |          |          |     |          |          |          |          |          |      |          |          |          |          |          |     |          |          |  |  |  |      |          |          |          |   |  |     |          |          |          |          |  |     |          |          |  |  |  |     |          |          |          |  |  |     |          |          |          |          |  |
| 8 B                                                                                                                             | 2.470989                                                                                                                                                                                                                                                                                                                                                                                                                                                                                                                                                                                                                                                                                                                                                                                                                                                                                                                                                                                                                                                                                                                                                                                                                                                                                                                                                                                                                                                                                                                                                                                                                                                                                                             | 2.905028 | 0.000000 |          |          |   |   |      |          |          |          |          |  |      |          |          |  |  |  |     |          |          |          |   |   |      |          |          |          |          |  |      |          |          |          |          |          |      |          |          |          |          |          |      |          |          |          |          |          |      |          |          |          |          |          |     |          |          |          |          |          |     |          |          |          |          |          |     |          |          |          |          |          |      |          |          |          |          |          |     |          |          |  |  |  |      |          |          |          |   |  |     |          |          |          |          |  |     |          |          |  |  |  |     |          |          |          |  |  |     |          |          |          |          |  |
| 9 B                                                                                                                             | 2.287643                                                                                                                                                                                                                                                                                                                                                                                                                                                                                                                                                                                                                                                                                                                                                                                                                                                                                                                                                                                                                                                                                                                                                                                                                                                                                                                                                                                                                                                                                                                                                                                                                                                                                                             | 1.821430 | 1.770724 | 0.000000 |          |   |   |      |          |          |          |          |  |      |          |          |  |  |  |     |          |          |          |   |   |      |          |          |          |          |  |      |          |          |          |          |          |      |          |          |          |          |          |      |          |          |          |          |          |      |          |          |          |          |          |     |          |          |          |          |          |     |          |          |          |          |          |     |          |          |          |          |          |      |          |          |          |          |          |     |          |          |  |  |  |      |          |          |          |   |  |     |          |          |          |          |  |     |          |          |  |  |  |     |          |          |          |  |  |     |          |          |          |          |  |
|  <p>9. -755.19540873 +27.4 C<sub>2v</sub></p> | <table border="0"> <tr><td></td><td>1</td><td>2</td><td>3</td><td>4</td><td>5</td></tr> <tr><td>1 B</td><td>0.000000</td><td></td><td></td><td></td><td></td></tr> <tr><td>2 Ru</td><td>2.198915</td><td>0.000000</td><td></td><td></td><td></td></tr> <tr><td>3 B</td><td>2.882400</td><td>2.198915</td><td>0.000000</td><td></td><td></td></tr> <tr><td>4 Ru</td><td>2.198915</td><td>3.178400</td><td>2.198915</td><td>0.000000</td><td></td></tr> <tr><td>5 B</td><td>1.676763</td><td>2.344237</td><td>3.167234</td><td>2.344237</td><td>0.000000</td></tr> <tr><td>6 B</td><td>3.006915</td><td>3.190718</td><td>3.006915</td><td>2.115827</td><td>1.743278</td></tr> <tr><td>7 B</td><td>3.167234</td><td>2.344237</td><td>1.676763</td><td>2.344237</td><td>2.504800</td></tr> <tr><td>8 B</td><td>3.006915</td><td>2.115827</td><td>3.006915</td><td>3.190718</td><td>1.743278</td></tr> <tr><td>9 B</td><td>1.744125</td><td>2.161159</td><td>1.744125</td><td>2.161159</td><td>2.929595</td></tr> <tr><td colspan="6"> </td></tr> <tr><td></td><td>6</td><td>7</td><td>8</td><td>9</td><td></td></tr> <tr><td>6 B</td><td>0.000000</td><td></td><td></td><td></td><td></td></tr> <tr><td>7 B</td><td>1.743278</td><td>0.000000</td><td></td><td></td><td></td></tr> <tr><td>8 B</td><td>1.794600</td><td>1.743278</td><td>0.000000</td><td></td><td></td></tr> <tr><td>9 B</td><td>3.578426</td><td>2.929595</td><td>3.578426</td><td>0.000000</td><td></td></tr> </table>                                                                                                                                                                                                                                |          | 1        | 2        | 3        | 4 | 5 | 1 B  | 0.000000 |          |          |          |  | 2 Ru | 2.198915 | 0.000000 |  |  |  | 3 B | 2.882400 | 2.198915 | 0.000000 |   |   | 4 Ru | 2.198915 | 3.178400 | 2.198915 | 0.000000 |  | 5 B  | 1.676763 | 2.344237 | 3.167234 | 2.344237 | 0.000000 | 6 B  | 3.006915 | 3.190718 | 3.006915 | 2.115827 | 1.743278 | 7 B  | 3.167234 | 2.344237 | 1.676763 | 2.344237 | 2.504800 | 8 B  | 3.006915 | 2.115827 | 3.006915 | 3.190718 | 1.743278 | 9 B | 1.744125 | 2.161159 | 1.744125 | 2.161159 | 2.929595 |     |          |          |          |          |          |     | 6        | 7        | 8        | 9        |          | 6 B  | 0.000000 |          |          |          |          | 7 B | 1.743278 | 0.000000 |  |  |  | 8 B  | 1.794600 | 1.743278 | 0.000000 |   |  | 9 B | 3.578426 | 2.929595 | 3.578426 | 0.000000 |  |     |          |          |  |  |  |     |          |          |          |  |  |     |          |          |          |          |  |
|                                                                                                                                 | 1                                                                                                                                                                                                                                                                                                                                                                                                                                                                                                                                                                                                                                                                                                                                                                                                                                                                                                                                                                                                                                                                                                                                                                                                                                                                                                                                                                                                                                                                                                                                                                                                                                                                                                                    | 2        | 3        | 4        | 5        |   |   |      |          |          |          |          |  |      |          |          |  |  |  |     |          |          |          |   |   |      |          |          |          |          |  |      |          |          |          |          |          |      |          |          |          |          |          |      |          |          |          |          |          |      |          |          |          |          |          |     |          |          |          |          |          |     |          |          |          |          |          |     |          |          |          |          |          |      |          |          |          |          |          |     |          |          |  |  |  |      |          |          |          |   |  |     |          |          |          |          |  |     |          |          |  |  |  |     |          |          |          |  |  |     |          |          |          |          |  |
| 1 B                                                                                                                             | 0.000000                                                                                                                                                                                                                                                                                                                                                                                                                                                                                                                                                                                                                                                                                                                                                                                                                                                                                                                                                                                                                                                                                                                                                                                                                                                                                                                                                                                                                                                                                                                                                                                                                                                                                                             |          |          |          |          |   |   |      |          |          |          |          |  |      |          |          |  |  |  |     |          |          |          |   |   |      |          |          |          |          |  |      |          |          |          |          |          |      |          |          |          |          |          |      |          |          |          |          |          |      |          |          |          |          |          |     |          |          |          |          |          |     |          |          |          |          |          |     |          |          |          |          |          |      |          |          |          |          |          |     |          |          |  |  |  |      |          |          |          |   |  |     |          |          |          |          |  |     |          |          |  |  |  |     |          |          |          |  |  |     |          |          |          |          |  |
| 2 Ru                                                                                                                            | 2.198915                                                                                                                                                                                                                                                                                                                                                                                                                                                                                                                                                                                                                                                                                                                                                                                                                                                                                                                                                                                                                                                                                                                                                                                                                                                                                                                                                                                                                                                                                                                                                                                                                                                                                                             | 0.000000 |          |          |          |   |   |      |          |          |          |          |  |      |          |          |  |  |  |     |          |          |          |   |   |      |          |          |          |          |  |      |          |          |          |          |          |      |          |          |          |          |          |      |          |          |          |          |          |      |          |          |          |          |          |     |          |          |          |          |          |     |          |          |          |          |          |     |          |          |          |          |          |      |          |          |          |          |          |     |          |          |  |  |  |      |          |          |          |   |  |     |          |          |          |          |  |     |          |          |  |  |  |     |          |          |          |  |  |     |          |          |          |          |  |
| 3 B                                                                                                                             | 2.882400                                                                                                                                                                                                                                                                                                                                                                                                                                                                                                                                                                                                                                                                                                                                                                                                                                                                                                                                                                                                                                                                                                                                                                                                                                                                                                                                                                                                                                                                                                                                                                                                                                                                                                             | 2.198915 | 0.000000 |          |          |   |   |      |          |          |          |          |  |      |          |          |  |  |  |     |          |          |          |   |   |      |          |          |          |          |  |      |          |          |          |          |          |      |          |          |          |          |          |      |          |          |          |          |          |      |          |          |          |          |          |     |          |          |          |          |          |     |          |          |          |          |          |     |          |          |          |          |          |      |          |          |          |          |          |     |          |          |  |  |  |      |          |          |          |   |  |     |          |          |          |          |  |     |          |          |  |  |  |     |          |          |          |  |  |     |          |          |          |          |  |
| 4 Ru                                                                                                                            | 2.198915                                                                                                                                                                                                                                                                                                                                                                                                                                                                                                                                                                                                                                                                                                                                                                                                                                                                                                                                                                                                                                                                                                                                                                                                                                                                                                                                                                                                                                                                                                                                                                                                                                                                                                             | 3.178400 | 2.198915 | 0.000000 |          |   |   |      |          |          |          |          |  |      |          |          |  |  |  |     |          |          |          |   |   |      |          |          |          |          |  |      |          |          |          |          |          |      |          |          |          |          |          |      |          |          |          |          |          |      |          |          |          |          |          |     |          |          |          |          |          |     |          |          |          |          |          |     |          |          |          |          |          |      |          |          |          |          |          |     |          |          |  |  |  |      |          |          |          |   |  |     |          |          |          |          |  |     |          |          |  |  |  |     |          |          |          |  |  |     |          |          |          |          |  |
| 5 B                                                                                                                             | 1.676763                                                                                                                                                                                                                                                                                                                                                                                                                                                                                                                                                                                                                                                                                                                                                                                                                                                                                                                                                                                                                                                                                                                                                                                                                                                                                                                                                                                                                                                                                                                                                                                                                                                                                                             | 2.344237 | 3.167234 | 2.344237 | 0.000000 |   |   |      |          |          |          |          |  |      |          |          |  |  |  |     |          |          |          |   |   |      |          |          |          |          |  |      |          |          |          |          |          |      |          |          |          |          |          |      |          |          |          |          |          |      |          |          |          |          |          |     |          |          |          |          |          |     |          |          |          |          |          |     |          |          |          |          |          |      |          |          |          |          |          |     |          |          |  |  |  |      |          |          |          |   |  |     |          |          |          |          |  |     |          |          |  |  |  |     |          |          |          |  |  |     |          |          |          |          |  |
| 6 B                                                                                                                             | 3.006915                                                                                                                                                                                                                                                                                                                                                                                                                                                                                                                                                                                                                                                                                                                                                                                                                                                                                                                                                                                                                                                                                                                                                                                                                                                                                                                                                                                                                                                                                                                                                                                                                                                                                                             | 3.190718 | 3.006915 | 2.115827 | 1.743278 |   |   |      |          |          |          |          |  |      |          |          |  |  |  |     |          |          |          |   |   |      |          |          |          |          |  |      |          |          |          |          |          |      |          |          |          |          |          |      |          |          |          |          |          |      |          |          |          |          |          |     |          |          |          |          |          |     |          |          |          |          |          |     |          |          |          |          |          |      |          |          |          |          |          |     |          |          |  |  |  |      |          |          |          |   |  |     |          |          |          |          |  |     |          |          |  |  |  |     |          |          |          |  |  |     |          |          |          |          |  |
| 7 B                                                                                                                             | 3.167234                                                                                                                                                                                                                                                                                                                                                                                                                                                                                                                                                                                                                                                                                                                                                                                                                                                                                                                                                                                                                                                                                                                                                                                                                                                                                                                                                                                                                                                                                                                                                                                                                                                                                                             | 2.344237 | 1.676763 | 2.344237 | 2.504800 |   |   |      |          |          |          |          |  |      |          |          |  |  |  |     |          |          |          |   |   |      |          |          |          |          |  |      |          |          |          |          |          |      |          |          |          |          |          |      |          |          |          |          |          |      |          |          |          |          |          |     |          |          |          |          |          |     |          |          |          |          |          |     |          |          |          |          |          |      |          |          |          |          |          |     |          |          |  |  |  |      |          |          |          |   |  |     |          |          |          |          |  |     |          |          |  |  |  |     |          |          |          |  |  |     |          |          |          |          |  |
| 8 B                                                                                                                             | 3.006915                                                                                                                                                                                                                                                                                                                                                                                                                                                                                                                                                                                                                                                                                                                                                                                                                                                                                                                                                                                                                                                                                                                                                                                                                                                                                                                                                                                                                                                                                                                                                                                                                                                                                                             | 2.115827 | 3.006915 | 3.190718 | 1.743278 |   |   |      |          |          |          |          |  |      |          |          |  |  |  |     |          |          |          |   |   |      |          |          |          |          |  |      |          |          |          |          |          |      |          |          |          |          |          |      |          |          |          |          |          |      |          |          |          |          |          |     |          |          |          |          |          |     |          |          |          |          |          |     |          |          |          |          |          |      |          |          |          |          |          |     |          |          |  |  |  |      |          |          |          |   |  |     |          |          |          |          |  |     |          |          |  |  |  |     |          |          |          |  |  |     |          |          |          |          |  |
| 9 B                                                                                                                             | 1.744125                                                                                                                                                                                                                                                                                                                                                                                                                                                                                                                                                                                                                                                                                                                                                                                                                                                                                                                                                                                                                                                                                                                                                                                                                                                                                                                                                                                                                                                                                                                                                                                                                                                                                                             | 2.161159 | 1.744125 | 2.161159 | 2.929595 |   |   |      |          |          |          |          |  |      |          |          |  |  |  |     |          |          |          |   |   |      |          |          |          |          |  |      |          |          |          |          |          |      |          |          |          |          |          |      |          |          |          |          |          |      |          |          |          |          |          |     |          |          |          |          |          |     |          |          |          |          |          |     |          |          |          |          |          |      |          |          |          |          |          |     |          |          |  |  |  |      |          |          |          |   |  |     |          |          |          |          |  |     |          |          |  |  |  |     |          |          |          |  |  |     |          |          |          |          |  |
|                                                                                                                                 |                                                                                                                                                                                                                                                                                                                                                                                                                                                                                                                                                                                                                                                                                                                                                                                                                                                                                                                                                                                                                                                                                                                                                                                                                                                                                                                                                                                                                                                                                                                                                                                                                                                                                                                      |          |          |          |          |   |   |      |          |          |          |          |  |      |          |          |  |  |  |     |          |          |          |   |   |      |          |          |          |          |  |      |          |          |          |          |          |      |          |          |          |          |          |      |          |          |          |          |          |      |          |          |          |          |          |     |          |          |          |          |          |     |          |          |          |          |          |     |          |          |          |          |          |      |          |          |          |          |          |     |          |          |  |  |  |      |          |          |          |   |  |     |          |          |          |          |  |     |          |          |  |  |  |     |          |          |          |  |  |     |          |          |          |          |  |
|                                                                                                                                 | 6                                                                                                                                                                                                                                                                                                                                                                                                                                                                                                                                                                                                                                                                                                                                                                                                                                                                                                                                                                                                                                                                                                                                                                                                                                                                                                                                                                                                                                                                                                                                                                                                                                                                                                                    | 7        | 8        | 9        |          |   |   |      |          |          |          |          |  |      |          |          |  |  |  |     |          |          |          |   |   |      |          |          |          |          |  |      |          |          |          |          |          |      |          |          |          |          |          |      |          |          |          |          |          |      |          |          |          |          |          |     |          |          |          |          |          |     |          |          |          |          |          |     |          |          |          |          |          |      |          |          |          |          |          |     |          |          |  |  |  |      |          |          |          |   |  |     |          |          |          |          |  |     |          |          |  |  |  |     |          |          |          |  |  |     |          |          |          |          |  |
| 6 B                                                                                                                             | 0.000000                                                                                                                                                                                                                                                                                                                                                                                                                                                                                                                                                                                                                                                                                                                                                                                                                                                                                                                                                                                                                                                                                                                                                                                                                                                                                                                                                                                                                                                                                                                                                                                                                                                                                                             |          |          |          |          |   |   |      |          |          |          |          |  |      |          |          |  |  |  |     |          |          |          |   |   |      |          |          |          |          |  |      |          |          |          |          |          |      |          |          |          |          |          |      |          |          |          |          |          |      |          |          |          |          |          |     |          |          |          |          |          |     |          |          |          |          |          |     |          |          |          |          |          |      |          |          |          |          |          |     |          |          |  |  |  |      |          |          |          |   |  |     |          |          |          |          |  |     |          |          |  |  |  |     |          |          |          |  |  |     |          |          |          |          |  |
| 7 B                                                                                                                             | 1.743278                                                                                                                                                                                                                                                                                                                                                                                                                                                                                                                                                                                                                                                                                                                                                                                                                                                                                                                                                                                                                                                                                                                                                                                                                                                                                                                                                                                                                                                                                                                                                                                                                                                                                                             | 0.000000 |          |          |          |   |   |      |          |          |          |          |  |      |          |          |  |  |  |     |          |          |          |   |   |      |          |          |          |          |  |      |          |          |          |          |          |      |          |          |          |          |          |      |          |          |          |          |          |      |          |          |          |          |          |     |          |          |          |          |          |     |          |          |          |          |          |     |          |          |          |          |          |      |          |          |          |          |          |     |          |          |  |  |  |      |          |          |          |   |  |     |          |          |          |          |  |     |          |          |  |  |  |     |          |          |          |  |  |     |          |          |          |          |  |
| 8 B                                                                                                                             | 1.794600                                                                                                                                                                                                                                                                                                                                                                                                                                                                                                                                                                                                                                                                                                                                                                                                                                                                                                                                                                                                                                                                                                                                                                                                                                                                                                                                                                                                                                                                                                                                                                                                                                                                                                             | 1.743278 | 0.000000 |          |          |   |   |      |          |          |          |          |  |      |          |          |  |  |  |     |          |          |          |   |   |      |          |          |          |          |  |      |          |          |          |          |          |      |          |          |          |          |          |      |          |          |          |          |          |      |          |          |          |          |          |     |          |          |          |          |          |     |          |          |          |          |          |     |          |          |          |          |          |      |          |          |          |          |          |     |          |          |  |  |  |      |          |          |          |   |  |     |          |          |          |          |  |     |          |          |  |  |  |     |          |          |          |  |  |     |          |          |          |          |  |
| 9 B                                                                                                                             | 3.578426                                                                                                                                                                                                                                                                                                                                                                                                                                                                                                                                                                                                                                                                                                                                                                                                                                                                                                                                                                                                                                                                                                                                                                                                                                                                                                                                                                                                                                                                                                                                                                                                                                                                                                             | 2.929595 | 3.578426 | 0.000000 |          |   |   |      |          |          |          |          |  |      |          |          |  |  |  |     |          |          |          |   |   |      |          |          |          |          |  |      |          |          |          |          |          |      |          |          |          |          |          |      |          |          |          |          |          |      |          |          |          |          |          |     |          |          |          |          |          |     |          |          |          |          |          |     |          |          |          |          |          |      |          |          |          |          |          |     |          |          |  |  |  |      |          |          |          |   |  |     |          |          |          |          |  |     |          |          |  |  |  |     |          |          |          |  |  |     |          |          |          |          |  |
|  <p>10. -755.19385153 +28.4</p>              | <table border="0"> <tr><td></td><td>1</td><td>2</td><td>3</td><td>4</td><td>5</td></tr> <tr><td>1 B</td><td>0.000000</td><td></td><td></td><td></td><td></td></tr> <tr><td>2 B</td><td>1.846639</td><td>0.000000</td><td></td><td></td><td></td></tr> <tr><td>3 B</td><td>2.527618</td><td>1.786751</td><td>0.000000</td><td></td><td></td></tr> <tr><td>4 B</td><td>1.890658</td><td>2.796069</td><td>2.061481</td><td>0.000000</td><td></td></tr> <tr><td>5 B</td><td>1.898798</td><td>3.008009</td><td>3.657796</td><td>3.150673</td><td>0.000000</td></tr> <tr><td>6 Ru</td><td>2.301001</td><td>3.654103</td><td>3.336782</td><td>2.068263</td><td>1.999365</td></tr> <tr><td>7 B</td><td>2.801555</td><td>3.045932</td><td>1.906031</td><td>1.976116</td><td>3.069343</td></tr> <tr><td>8 Ru</td><td>2.348065</td><td>2.036879</td><td>2.285166</td><td>3.033928</td><td>2.086132</td></tr> <tr><td>9 B</td><td>1.826882</td><td>1.716705</td><td>1.673242</td><td>1.734102</td><td>3.615494</td></tr> <tr><td colspan="6"> </td></tr> <tr><td></td><td>6</td><td>7</td><td>8</td><td>9</td><td></td></tr> <tr><td>6 Ru</td><td>0.000000</td><td></td><td></td><td></td><td></td></tr> <tr><td>7 B</td><td>2.063338</td><td>0.000000</td><td></td><td></td><td></td></tr> <tr><td>8 Ru</td><td>2.744583</td><td>2.089686</td><td>0.000000</td><td></td><td></td></tr> <tr><td>9 B</td><td>3.435841</td><td>2.959261</td><td>3.108361</td><td>0.000000</td><td></td></tr> </table>                                                                                                                                                                                                                              |          | 1        | 2        | 3        | 4 | 5 | 1 B  | 0.000000 |          |          |          |  | 2 B  | 1.846639 | 0.000000 |  |  |  | 3 B | 2.527618 | 1.786751 | 0.000000 |   |   | 4 B  | 1.890658 | 2.796069 | 2.061481 | 0.000000 |  | 5 B  | 1.898798 | 3.008009 | 3.657796 | 3.150673 | 0.000000 | 6 Ru | 2.301001 | 3.654103 | 3.336782 | 2.068263 | 1.999365 | 7 B  | 2.801555 | 3.045932 | 1.906031 | 1.976116 | 3.069343 | 8 Ru | 2.348065 | 2.036879 | 2.285166 | 3.033928 | 2.086132 | 9 B | 1.826882 | 1.716705 | 1.673242 | 1.734102 | 3.615494 |     |          |          |          |          |          |     | 6        | 7        | 8        | 9        |          | 6 Ru | 0.000000 |          |          |          |          | 7 B | 2.063338 | 0.000000 |  |  |  | 8 Ru | 2.744583 | 2.089686 | 0.000000 |   |  | 9 B | 3.435841 | 2.959261 | 3.108361 | 0.000000 |  |     |          |          |  |  |  |     |          |          |          |  |  |     |          |          |          |          |  |
|                                                                                                                                 | 1                                                                                                                                                                                                                                                                                                                                                                                                                                                                                                                                                                                                                                                                                                                                                                                                                                                                                                                                                                                                                                                                                                                                                                                                                                                                                                                                                                                                                                                                                                                                                                                                                                                                                                                    | 2        | 3        | 4        | 5        |   |   |      |          |          |          |          |  |      |          |          |  |  |  |     |          |          |          |   |   |      |          |          |          |          |  |      |          |          |          |          |          |      |          |          |          |          |          |      |          |          |          |          |          |      |          |          |          |          |          |     |          |          |          |          |          |     |          |          |          |          |          |     |          |          |          |          |          |      |          |          |          |          |          |     |          |          |  |  |  |      |          |          |          |   |  |     |          |          |          |          |  |     |          |          |  |  |  |     |          |          |          |  |  |     |          |          |          |          |  |
| 1 B                                                                                                                             | 0.000000                                                                                                                                                                                                                                                                                                                                                                                                                                                                                                                                                                                                                                                                                                                                                                                                                                                                                                                                                                                                                                                                                                                                                                                                                                                                                                                                                                                                                                                                                                                                                                                                                                                                                                             |          |          |          |          |   |   |      |          |          |          |          |  |      |          |          |  |  |  |     |          |          |          |   |   |      |          |          |          |          |  |      |          |          |          |          |          |      |          |          |          |          |          |      |          |          |          |          |          |      |          |          |          |          |          |     |          |          |          |          |          |     |          |          |          |          |          |     |          |          |          |          |          |      |          |          |          |          |          |     |          |          |  |  |  |      |          |          |          |   |  |     |          |          |          |          |  |     |          |          |  |  |  |     |          |          |          |  |  |     |          |          |          |          |  |
| 2 B                                                                                                                             | 1.846639                                                                                                                                                                                                                                                                                                                                                                                                                                                                                                                                                                                                                                                                                                                                                                                                                                                                                                                                                                                                                                                                                                                                                                                                                                                                                                                                                                                                                                                                                                                                                                                                                                                                                                             | 0.000000 |          |          |          |   |   |      |          |          |          |          |  |      |          |          |  |  |  |     |          |          |          |   |   |      |          |          |          |          |  |      |          |          |          |          |          |      |          |          |          |          |          |      |          |          |          |          |          |      |          |          |          |          |          |     |          |          |          |          |          |     |          |          |          |          |          |     |          |          |          |          |          |      |          |          |          |          |          |     |          |          |  |  |  |      |          |          |          |   |  |     |          |          |          |          |  |     |          |          |  |  |  |     |          |          |          |  |  |     |          |          |          |          |  |
| 3 B                                                                                                                             | 2.527618                                                                                                                                                                                                                                                                                                                                                                                                                                                                                                                                                                                                                                                                                                                                                                                                                                                                                                                                                                                                                                                                                                                                                                                                                                                                                                                                                                                                                                                                                                                                                                                                                                                                                                             | 1.786751 | 0.000000 |          |          |   |   |      |          |          |          |          |  |      |          |          |  |  |  |     |          |          |          |   |   |      |          |          |          |          |  |      |          |          |          |          |          |      |          |          |          |          |          |      |          |          |          |          |          |      |          |          |          |          |          |     |          |          |          |          |          |     |          |          |          |          |          |     |          |          |          |          |          |      |          |          |          |          |          |     |          |          |  |  |  |      |          |          |          |   |  |     |          |          |          |          |  |     |          |          |  |  |  |     |          |          |          |  |  |     |          |          |          |          |  |
| 4 B                                                                                                                             | 1.890658                                                                                                                                                                                                                                                                                                                                                                                                                                                                                                                                                                                                                                                                                                                                                                                                                                                                                                                                                                                                                                                                                                                                                                                                                                                                                                                                                                                                                                                                                                                                                                                                                                                                                                             | 2.796069 | 2.061481 | 0.000000 |          |   |   |      |          |          |          |          |  |      |          |          |  |  |  |     |          |          |          |   |   |      |          |          |          |          |  |      |          |          |          |          |          |      |          |          |          |          |          |      |          |          |          |          |          |      |          |          |          |          |          |     |          |          |          |          |          |     |          |          |          |          |          |     |          |          |          |          |          |      |          |          |          |          |          |     |          |          |  |  |  |      |          |          |          |   |  |     |          |          |          |          |  |     |          |          |  |  |  |     |          |          |          |  |  |     |          |          |          |          |  |
| 5 B                                                                                                                             | 1.898798                                                                                                                                                                                                                                                                                                                                                                                                                                                                                                                                                                                                                                                                                                                                                                                                                                                                                                                                                                                                                                                                                                                                                                                                                                                                                                                                                                                                                                                                                                                                                                                                                                                                                                             | 3.008009 | 3.657796 | 3.150673 | 0.000000 |   |   |      |          |          |          |          |  |      |          |          |  |  |  |     |          |          |          |   |   |      |          |          |          |          |  |      |          |          |          |          |          |      |          |          |          |          |          |      |          |          |          |          |          |      |          |          |          |          |          |     |          |          |          |          |          |     |          |          |          |          |          |     |          |          |          |          |          |      |          |          |          |          |          |     |          |          |  |  |  |      |          |          |          |   |  |     |          |          |          |          |  |     |          |          |  |  |  |     |          |          |          |  |  |     |          |          |          |          |  |
| 6 Ru                                                                                                                            | 2.301001                                                                                                                                                                                                                                                                                                                                                                                                                                                                                                                                                                                                                                                                                                                                                                                                                                                                                                                                                                                                                                                                                                                                                                                                                                                                                                                                                                                                                                                                                                                                                                                                                                                                                                             | 3.654103 | 3.336782 | 2.068263 | 1.999365 |   |   |      |          |          |          |          |  |      |          |          |  |  |  |     |          |          |          |   |   |      |          |          |          |          |  |      |          |          |          |          |          |      |          |          |          |          |          |      |          |          |          |          |          |      |          |          |          |          |          |     |          |          |          |          |          |     |          |          |          |          |          |     |          |          |          |          |          |      |          |          |          |          |          |     |          |          |  |  |  |      |          |          |          |   |  |     |          |          |          |          |  |     |          |          |  |  |  |     |          |          |          |  |  |     |          |          |          |          |  |
| 7 B                                                                                                                             | 2.801555                                                                                                                                                                                                                                                                                                                                                                                                                                                                                                                                                                                                                                                                                                                                                                                                                                                                                                                                                                                                                                                                                                                                                                                                                                                                                                                                                                                                                                                                                                                                                                                                                                                                                                             | 3.045932 | 1.906031 | 1.976116 | 3.069343 |   |   |      |          |          |          |          |  |      |          |          |  |  |  |     |          |          |          |   |   |      |          |          |          |          |  |      |          |          |          |          |          |      |          |          |          |          |          |      |          |          |          |          |          |      |          |          |          |          |          |     |          |          |          |          |          |     |          |          |          |          |          |     |          |          |          |          |          |      |          |          |          |          |          |     |          |          |  |  |  |      |          |          |          |   |  |     |          |          |          |          |  |     |          |          |  |  |  |     |          |          |          |  |  |     |          |          |          |          |  |
| 8 Ru                                                                                                                            | 2.348065                                                                                                                                                                                                                                                                                                                                                                                                                                                                                                                                                                                                                                                                                                                                                                                                                                                                                                                                                                                                                                                                                                                                                                                                                                                                                                                                                                                                                                                                                                                                                                                                                                                                                                             | 2.036879 | 2.285166 | 3.033928 | 2.086132 |   |   |      |          |          |          |          |  |      |          |          |  |  |  |     |          |          |          |   |   |      |          |          |          |          |  |      |          |          |          |          |          |      |          |          |          |          |          |      |          |          |          |          |          |      |          |          |          |          |          |     |          |          |          |          |          |     |          |          |          |          |          |     |          |          |          |          |          |      |          |          |          |          |          |     |          |          |  |  |  |      |          |          |          |   |  |     |          |          |          |          |  |     |          |          |  |  |  |     |          |          |          |  |  |     |          |          |          |          |  |
| 9 B                                                                                                                             | 1.826882                                                                                                                                                                                                                                                                                                                                                                                                                                                                                                                                                                                                                                                                                                                                                                                                                                                                                                                                                                                                                                                                                                                                                                                                                                                                                                                                                                                                                                                                                                                                                                                                                                                                                                             | 1.716705 | 1.673242 | 1.734102 | 3.615494 |   |   |      |          |          |          |          |  |      |          |          |  |  |  |     |          |          |          |   |   |      |          |          |          |          |  |      |          |          |          |          |          |      |          |          |          |          |          |      |          |          |          |          |          |      |          |          |          |          |          |     |          |          |          |          |          |     |          |          |          |          |          |     |          |          |          |          |          |      |          |          |          |          |          |     |          |          |  |  |  |      |          |          |          |   |  |     |          |          |          |          |  |     |          |          |  |  |  |     |          |          |          |  |  |     |          |          |          |          |  |
|                                                                                                                                 |                                                                                                                                                                                                                                                                                                                                                                                                                                                                                                                                                                                                                                                                                                                                                                                                                                                                                                                                                                                                                                                                                                                                                                                                                                                                                                                                                                                                                                                                                                                                                                                                                                                                                                                      |          |          |          |          |   |   |      |          |          |          |          |  |      |          |          |  |  |  |     |          |          |          |   |   |      |          |          |          |          |  |      |          |          |          |          |          |      |          |          |          |          |          |      |          |          |          |          |          |      |          |          |          |          |          |     |          |          |          |          |          |     |          |          |          |          |          |     |          |          |          |          |          |      |          |          |          |          |          |     |          |          |  |  |  |      |          |          |          |   |  |     |          |          |          |          |  |     |          |          |  |  |  |     |          |          |          |  |  |     |          |          |          |          |  |
|                                                                                                                                 | 6                                                                                                                                                                                                                                                                                                                                                                                                                                                                                                                                                                                                                                                                                                                                                                                                                                                                                                                                                                                                                                                                                                                                                                                                                                                                                                                                                                                                                                                                                                                                                                                                                                                                                                                    | 7        | 8        | 9        |          |   |   |      |          |          |          |          |  |      |          |          |  |  |  |     |          |          |          |   |   |      |          |          |          |          |  |      |          |          |          |          |          |      |          |          |          |          |          |      |          |          |          |          |          |      |          |          |          |          |          |     |          |          |          |          |          |     |          |          |          |          |          |     |          |          |          |          |          |      |          |          |          |          |          |     |          |          |  |  |  |      |          |          |          |   |  |     |          |          |          |          |  |     |          |          |  |  |  |     |          |          |          |  |  |     |          |          |          |          |  |
| 6 Ru                                                                                                                            | 0.000000                                                                                                                                                                                                                                                                                                                                                                                                                                                                                                                                                                                                                                                                                                                                                                                                                                                                                                                                                                                                                                                                                                                                                                                                                                                                                                                                                                                                                                                                                                                                                                                                                                                                                                             |          |          |          |          |   |   |      |          |          |          |          |  |      |          |          |  |  |  |     |          |          |          |   |   |      |          |          |          |          |  |      |          |          |          |          |          |      |          |          |          |          |          |      |          |          |          |          |          |      |          |          |          |          |          |     |          |          |          |          |          |     |          |          |          |          |          |     |          |          |          |          |          |      |          |          |          |          |          |     |          |          |  |  |  |      |          |          |          |   |  |     |          |          |          |          |  |     |          |          |  |  |  |     |          |          |          |  |  |     |          |          |          |          |  |
| 7 B                                                                                                                             | 2.063338                                                                                                                                                                                                                                                                                                                                                                                                                                                                                                                                                                                                                                                                                                                                                                                                                                                                                                                                                                                                                                                                                                                                                                                                                                                                                                                                                                                                                                                                                                                                                                                                                                                                                                             | 0.000000 |          |          |          |   |   |      |          |          |          |          |  |      |          |          |  |  |  |     |          |          |          |   |   |      |          |          |          |          |  |      |          |          |          |          |          |      |          |          |          |          |          |      |          |          |          |          |          |      |          |          |          |          |          |     |          |          |          |          |          |     |          |          |          |          |          |     |          |          |          |          |          |      |          |          |          |          |          |     |          |          |  |  |  |      |          |          |          |   |  |     |          |          |          |          |  |     |          |          |  |  |  |     |          |          |          |  |  |     |          |          |          |          |  |
| 8 Ru                                                                                                                            | 2.744583                                                                                                                                                                                                                                                                                                                                                                                                                                                                                                                                                                                                                                                                                                                                                                                                                                                                                                                                                                                                                                                                                                                                                                                                                                                                                                                                                                                                                                                                                                                                                                                                                                                                                                             | 2.089686 | 0.000000 |          |          |   |   |      |          |          |          |          |  |      |          |          |  |  |  |     |          |          |          |   |   |      |          |          |          |          |  |      |          |          |          |          |          |      |          |          |          |          |          |      |          |          |          |          |          |      |          |          |          |          |          |     |          |          |          |          |          |     |          |          |          |          |          |     |          |          |          |          |          |      |          |          |          |          |          |     |          |          |  |  |  |      |          |          |          |   |  |     |          |          |          |          |  |     |          |          |  |  |  |     |          |          |          |  |  |     |          |          |          |          |  |
| 9 B                                                                                                                             | 3.435841                                                                                                                                                                                                                                                                                                                                                                                                                                                                                                                                                                                                                                                                                                                                                                                                                                                                                                                                                                                                                                                                                                                                                                                                                                                                                                                                                                                                                                                                                                                                                                                                                                                                                                             | 2.959261 | 3.108361 | 0.000000 |          |   |   |      |          |          |          |          |  |      |          |          |  |  |  |     |          |          |          |   |   |      |          |          |          |          |  |      |          |          |          |          |          |      |          |          |          |          |          |      |          |          |          |          |          |      |          |          |          |          |          |     |          |          |          |          |          |     |          |          |          |          |          |     |          |          |          |          |          |      |          |          |          |          |          |     |          |          |  |  |  |      |          |          |          |   |  |     |          |          |          |          |  |     |          |          |  |  |  |     |          |          |          |  |  |     |          |          |          |          |  |

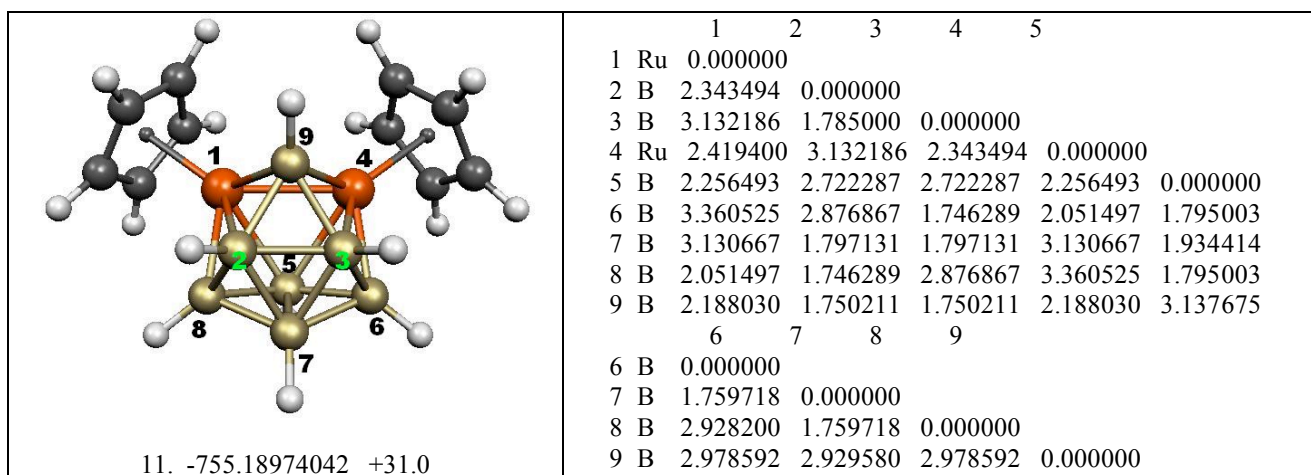

Table S2C. Energy ranking of the Cp<sub>2</sub>Ru<sub>2</sub>B<sub>7</sub>H<sub>7</sub> structures

| No | Initial structure               | Final energy (a.u.) | ΔE<br>kcal/mole |
|----|---------------------------------|---------------------|-----------------|
| 1  | 09-Ru-2-PressCapCube_j_r-45-295 | -755.23909887       | 0.00            |
| 2  | 09-Ru-2-PressCapCube_a_r-295    | -755.23909886       | 0.00            |
| 3  | 09-Ru-2-PressCapCube_j_r-58-295 | -755.23909886       | 0.00            |
| 4  | 09-Ru-1-CapCube_f               | -755.23909885       | 0.00            |
| 5  | 09-Ru-2-PressCapCube_j_r-520    | -755.23909884       | 0.00            |
| 6  | 09-Ru-3-TI99-b                  | -755.23909884       | 0.00            |
| 7  | 09-Ru-3-TI99-c                  | -755.22461710       | 9.09            |
| 8  | 09-Ru-3-TI99-m                  | -755.20969883       | 18.45           |
| 9  | 09-Ru-4-TrTrPr_e                | -755.20969881       | 18.45           |
| 10 | 09-Ru-structure-5-ch3           | -755.20352898       | 22.32           |
| 11 | 09-Ru-structure-f4              | -755.20352898       | 22.32           |
| 12 | 09-Ru-Bipyr-hept3               | -755.20230649       | 23.09           |
| 13 | 09-Ru-2-PressCapCube_f          | -755.19992343       | 24.58           |
| 14 | 09-Ru-3-TI99-j_r-144            | -755.19955932       | 24.81           |
| 15 | 09-Ru-3-TI99-g                  | -755.19717078       | 26.31           |
| 16 | 09-Ru-1-CapCube_b               | -755.19717077       | 26.31           |
| 17 | 09-Ru-2-PressCapCube_j_r-178-70 | -755.19610313       | 26.98           |
| 18 | 09-Ru-2-PressCapCube_j_r-62-70  | -755.19610313       | 26.98           |
| 19 | 09-Ru-2-PressCapCube_j_r-566-70 | -755.19610312       | 26.98           |
| 20 | 09-Ru-1-CapCube_d               | -755.19540873       | 27.42           |
| 21 | 09-Ru-1-CapCube_g               | -755.19540873       | 27.42           |
| 22 | 09-Ru-1-CapCube_i               | -755.19385153       | 28.39           |
| 23 | 09-Ru-structure-1               | -755.19377601       | 28.44           |
| 24 | 09-Ru-2-PressCapCube_e_r-340    | -755.19377600       | 28.44           |
| 25 | 09-Ru-3-TI99-a-                 | -755.19034560       | 30.59           |
| 26 | 09-Ru-1-CapCube_c               | -755.18974042       | 30.97           |
| 27 | 09-Ru-2-PressCapCube_j_r-530    | -755.18974042       | 30.97           |
| 28 | 09-Ru-2-PressCapCube_j_r-91     | -755.18974042       | 30.97           |
| 29 | 09-Ru-2-PressCapCube_j_r-59     | -755.18974042       | 30.97           |
| 30 | 09-Ru-3-TI99-e                  | -755.18974042       | 30.97           |
| 31 | 09-Ru-4-TrTrPr_a                | -755.18974042       | 30.97           |
| 32 | 09-Ru-4-TrTrPr_d_r-158          | -755.18974042       | 30.97           |
| 33 | 09-Ru-4-TrTrPr_d_r-29           | -755.18974042       | 30.97           |
| 34 | 09-Ru-2-PressCapCube_e_i-340    | -755.18939515       | 31.19           |
| 35 | 09-Ru-2-PressCapCube_h          | -755.18649186       | 33.01           |
| 36 | 09-Ru-3-TI99-i                  | -755.18488766       | 34.02           |
| 37 | 09-Ru-4-TrTrPr_c                | -755.17441952       | 40.59           |
| 38 | 09-Ru-2-PressCapCube_n          | -755.17366258       | 41.06           |
| 39 | 09-Ru-1-CapCube_h               | -755.17231461       | 41.91           |
| 40 | 09-Ru-4-TrTrPr_f_r-160          | -755.17122513       | 42.59           |
| 41 | 09-Ru-3-TI99-d_r-16-158-81      | -755.17031968       | 43.16           |

|    |                                   |               |        |
|----|-----------------------------------|---------------|--------|
| 42 | 09-Ru-3-Tl99-d_r-196-93           | -755.17031965 | 43.16  |
| 43 | 09-Ru-3-Tl99-d_r-196-31           | -755.17031965 | 43.16  |
| 44 | 09-Ru-3-Tl99-d_r-32-176           | -755.17031965 | 43.16  |
| 45 | 09-Ru-3-Tl99-d_r-16-158-48        | -755.17031965 | 43.16  |
| 46 | 09-Ru-1-CapCube_e                 | -755.17031964 | 43.16  |
| 47 | 09-Ru-4-TrTrPr_d imag             | -755.16665698 | 45.46  |
| 48 | 09-Ru-4-TrTrPr_f i-160            | -755.16559481 | 46.12  |
| 49 | 09-Ru-2-PressCapCube_l            | -755.16511373 | 46.43  |
| 50 | 09-Ru-2-PressCapCube_i            | -755.16085100 | 49.10  |
| 51 | 09-Ru-2-PressCapCube_c            | -755.15409989 | 53.34  |
| 52 | 09-Ru-2-PressCapCube_j_r-566-360  | -755.15409989 | 53.34  |
| 53 | 09-Ru-2-PressCapCube_j_r-178-360  | -755.15409989 | 53.34  |
| 54 | 09-Ru-2-PressCapCube_j_r-62-360   | -755.15409989 | 53.34  |
| 55 | 09-Ru-4-TrTrPr_b                  | -755.15409989 | 53.34  |
| 56 | 09-Ru-3-Tl99-k_r-49               | -755.15298130 | 54.04  |
| 57 | 09-Ru-3-Tl99-j i-144              | -755.15139667 | 55.03  |
| 58 | 09-Ru-3-Tl99-f                    | -755.15115205 | 55.19  |
| 59 | 09-Ru-3-Tl99-k_r-221              | -755.15080678 | 55.40  |
| 60 | 09-Ru-2-PressCapCube_g            | -755.14660298 | 58.04  |
| 61 | 09-Ru-3-Tl99-h                    | -755.14276478 | 60.45  |
| 62 | 09-Ru-1-CapCube_a                 | -755.14276477 | 60.45  |
| 63 | 09-Ru-2-PressCapCube_m            | -755.14248991 | 60.62  |
| 64 | 09-Ru-2-PressCapCube_k            | -755.13862112 | 63.05  |
| 65 | 09-Ru-3-Tl99-l_r-655              | -755.13314471 | 66.49  |
| 66 | 09-Ru-3-Tl99-d_r-16-158 imag      | -755.13209352 | 67.15  |
| 67 | 09-Ru-3-Tl99-d_r-196              | -755.13157174 | 67.47  |
| 68 | 09-Ru-3-Tl99-d_r-32 i-176         | -755.13148898 | 67.53  |
| 69 | 09-Ru-3-Tl99-d_r-16-40 i-176      | -755.13148467 | 67.53  |
| 70 | 09-Ru-3-Tl99-d_r-16 imag          | -755.13122407 | 67.69  |
| 71 | 09-Ru-2-PressCapCube_j_r-58 i-295 | -755.13099849 | 67.83  |
| 72 | 09-Ru-2-PressCapCube_a i-295      | -755.13099848 | 67.83  |
| 73 | 09-Ru-2-PressCapCube_j_r-45 i-295 | -755.13099848 | 67.83  |
| 74 | 09-Ru-2-PressCapCube_d            | -755.12975981 | 68.61  |
| 75 | 09-Ru-3-Tl99-d imag               | -755.12969808 | 68.65  |
| 76 | 09-Ru-2-PressCapCube_o            | -755.12804650 | 69.69  |
| 77 | 09-Ru-2-PressCapCube_b            | -755.12326473 | 72.69  |
| 78 | 09-Ru-Bipyr-hept1                 | -755.12130343 | 73.92  |
| 79 | 09-Ru-Bipyr-hept2                 | -755.11956666 | 75.01  |
| 80 | 09-Ru-3-Tl99-l i-655              | -755.09151406 | 92.61  |
| 81 | 09-Ru-3-Tl99-k imag               | -755.08279867 | 98.08  |
| 82 | 09-Ru-2-PressCapCube_j_r-178 imag | -755.04601606 | 121.16 |
| 83 | 09-Ru-2-PressCapCube_j_r-62 imag  | -755.04601606 | 121.16 |
| 84 | 09-Ru-2-PressCapCube_j_r-566 imag | -755.04601605 | 121.16 |
| 85 | 09-Ru-3-Tl99-a                    | -755.03436909 | 128.47 |
| 86 | 09-Ru-2-PressCapCube_j imag       | -754.97413669 | 166.26 |



## The 10-vertex $\text{Cp}_2\text{Ru}_2\text{B}_8\text{H}_8$ Structures

Table S3A. Initial structures

Table S3B. Lowest energy structure distances

Table S3C. Global ranking of all structures

Table S3A. Initial  $\text{Cp}_2\text{Ru}_2\text{B}_8\text{H}_8$  structures (one example from each family) 62 structures in total

|                                                                                                                                                 |                                                                                                                                                   |
|-------------------------------------------------------------------------------------------------------------------------------------------------|---------------------------------------------------------------------------------------------------------------------------------------------------|
| <p><b>Initial structures</b></p>                                                                                                                | 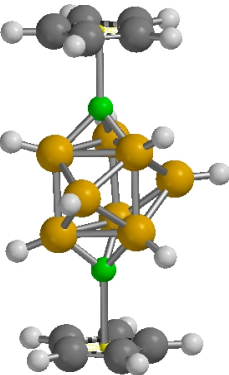 <p>1. Tetracapped trigonal prism (<math>C_{2v}</math>) 16</p> |
|  <p>2. Tetracapped trigonal prism (<math>C_{3v}</math>) 9</p> |  <p>3. Bicapped cube 8</p>                                    |
|  <p>4. Bicapped square antiprism 7</p>                       |  <p>5. Pentagonal prism 5</p>                                 |
|  <p>6. Pentagonal antiprism 5</p>                            |  <p>7. Isocloso structure 12</p>                              |

Table S3B. Distance table for the lowest energy Cp<sub>2</sub>Ru<sub>2</sub>B<sub>8</sub>H<sub>8</sub> structures

| 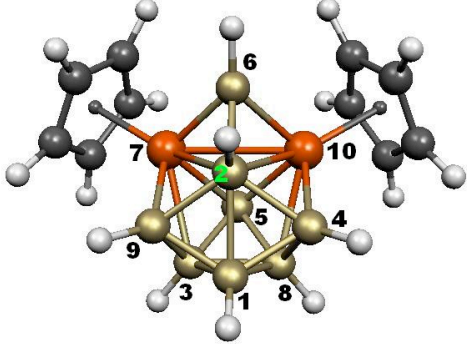 <p><b>1. -780.71376957 0.0 kcal/mole Cs</b></p> | <table border="1"> <thead> <tr> <th></th> <th>1</th> <th>2</th> <th>3</th> <th>4</th> <th>5</th> </tr> </thead> <tbody> <tr><td>1 B</td><td>0.000000</td><td></td><td></td><td></td><td></td></tr> <tr><td>2 B</td><td>1.972300</td><td>0.000000</td><td></td><td></td><td></td></tr> <tr><td>3 B</td><td>1.784489</td><td>2.719156</td><td>0.000000</td><td></td><td></td></tr> <tr><td>4 B</td><td>1.748677</td><td>1.839151</td><td>2.889244</td><td>0.000000</td><td></td></tr> <tr><td>5 B</td><td>2.914655</td><td>3.003423</td><td>1.789502</td><td>2.966391</td><td>0.000000</td></tr> <tr><td>6 B</td><td>3.627249</td><td>1.841428</td><td>3.681823</td><td>3.079926</td><td>3.116466</td></tr> <tr><td>7 Ru</td><td>3.152953</td><td>2.305427</td><td>2.312358</td><td>3.521707</td><td>2.129254</td></tr> <tr><td>8 B</td><td>1.784418</td><td>2.719065</td><td>1.776400</td><td>1.756515</td><td>1.789525</td></tr> <tr><td>9 B</td><td>1.748677</td><td>1.839151</td><td>1.756609</td><td>2.962200</td><td>2.966391</td></tr> <tr><td>10 Ru</td><td>3.152953</td><td>2.305427</td><td>3.204425</td><td>2.048400</td><td>2.129254</td></tr> <tr> <td></td> <td>6</td> <td>7</td> <td>8</td> <td>9</td> <td>10</td> </tr> <tr><td>6 B</td><td>0.000000</td><td></td><td></td><td></td><td></td></tr> <tr><td>7 Ru</td><td>2.044644</td><td>0.000000</td><td></td><td></td><td></td></tr> <tr><td>8 B</td><td>3.681754</td><td>3.204389</td><td>0.000000</td><td></td><td></td></tr> <tr><td>9 B</td><td>3.079926</td><td>2.048400</td><td>2.889186</td><td>0.000000</td><td></td></tr> <tr><td>10 Ru</td><td>2.044644</td><td>2.770400</td><td>2.312309</td><td>3.521707</td><td>0.000000</td></tr> </tbody> </table> |          | 1        | 2        | 3        | 4 | 5 | 1 B | 0.000000 |  |  |  |  | 2 B | 1.972300 | 0.000000 |  |  |  | 3 B | 1.784489 | 2.719156 | 0.000000 |  |  | 4 B | 1.748677 | 1.839151 | 2.889244 | 0.000000 |  | 5 B  | 2.914655 | 3.003423 | 1.789502 | 2.966391 | 0.000000 | 6 B  | 3.627249 | 1.841428 | 3.681823 | 3.079926 | 3.116466 | 7 Ru | 3.152953 | 2.305427 | 2.312358 | 3.521707 | 2.129254 | 8 B  | 1.784418 | 2.719065 | 1.776400 | 1.756515 | 1.789525 | 9 B | 1.748677 | 1.839151 | 1.756609 | 2.962200 | 2.966391 | 10 Ru | 3.152953 | 2.305427 | 3.204425 | 2.048400 | 2.129254 |  | 6 | 7 | 8 | 9 | 10 | 6 B  | 0.000000 |  |  |  |  | 7 Ru | 2.044644 | 0.000000 |  |  |  | 8 B  | 3.681754 | 3.204389 | 0.000000 |  |  | 9 B | 3.079926 | 2.048400 | 2.889186 | 0.000000 |  | 10 Ru | 2.044644 | 2.770400 | 2.312309 | 3.521707 | 0.000000 |
|-----------------------------------------------------------------------------------------------------------------------------------|-----------------------------------------------------------------------------------------------------------------------------------------------------------------------------------------------------------------------------------------------------------------------------------------------------------------------------------------------------------------------------------------------------------------------------------------------------------------------------------------------------------------------------------------------------------------------------------------------------------------------------------------------------------------------------------------------------------------------------------------------------------------------------------------------------------------------------------------------------------------------------------------------------------------------------------------------------------------------------------------------------------------------------------------------------------------------------------------------------------------------------------------------------------------------------------------------------------------------------------------------------------------------------------------------------------------------------------------------------------------------------------------------------------------------------------------------------------------------------------------------------------------------------------------------------------------------------------------------------------------------------------------------------------------------------------------------------------------------------------|----------|----------|----------|----------|---|---|-----|----------|--|--|--|--|-----|----------|----------|--|--|--|-----|----------|----------|----------|--|--|-----|----------|----------|----------|----------|--|------|----------|----------|----------|----------|----------|------|----------|----------|----------|----------|----------|------|----------|----------|----------|----------|----------|------|----------|----------|----------|----------|----------|-----|----------|----------|----------|----------|----------|-------|----------|----------|----------|----------|----------|--|---|---|---|---|----|------|----------|--|--|--|--|------|----------|----------|--|--|--|------|----------|----------|----------|--|--|-----|----------|----------|----------|----------|--|-------|----------|----------|----------|----------|----------|
|                                                                                                                                   | 1                                                                                                                                                                                                                                                                                                                                                                                                                                                                                                                                                                                                                                                                                                                                                                                                                                                                                                                                                                                                                                                                                                                                                                                                                                                                                                                                                                                                                                                                                                                                                                                                                                                                                                                                 | 2        | 3        | 4        | 5        |   |   |     |          |  |  |  |  |     |          |          |  |  |  |     |          |          |          |  |  |     |          |          |          |          |  |      |          |          |          |          |          |      |          |          |          |          |          |      |          |          |          |          |          |      |          |          |          |          |          |     |          |          |          |          |          |       |          |          |          |          |          |  |   |   |   |   |    |      |          |  |  |  |  |      |          |          |  |  |  |      |          |          |          |  |  |     |          |          |          |          |  |       |          |          |          |          |          |
| 1 B                                                                                                                               | 0.000000                                                                                                                                                                                                                                                                                                                                                                                                                                                                                                                                                                                                                                                                                                                                                                                                                                                                                                                                                                                                                                                                                                                                                                                                                                                                                                                                                                                                                                                                                                                                                                                                                                                                                                                          |          |          |          |          |   |   |     |          |  |  |  |  |     |          |          |  |  |  |     |          |          |          |  |  |     |          |          |          |          |  |      |          |          |          |          |          |      |          |          |          |          |          |      |          |          |          |          |          |      |          |          |          |          |          |     |          |          |          |          |          |       |          |          |          |          |          |  |   |   |   |   |    |      |          |  |  |  |  |      |          |          |  |  |  |      |          |          |          |  |  |     |          |          |          |          |  |       |          |          |          |          |          |
| 2 B                                                                                                                               | 1.972300                                                                                                                                                                                                                                                                                                                                                                                                                                                                                                                                                                                                                                                                                                                                                                                                                                                                                                                                                                                                                                                                                                                                                                                                                                                                                                                                                                                                                                                                                                                                                                                                                                                                                                                          | 0.000000 |          |          |          |   |   |     |          |  |  |  |  |     |          |          |  |  |  |     |          |          |          |  |  |     |          |          |          |          |  |      |          |          |          |          |          |      |          |          |          |          |          |      |          |          |          |          |          |      |          |          |          |          |          |     |          |          |          |          |          |       |          |          |          |          |          |  |   |   |   |   |    |      |          |  |  |  |  |      |          |          |  |  |  |      |          |          |          |  |  |     |          |          |          |          |  |       |          |          |          |          |          |
| 3 B                                                                                                                               | 1.784489                                                                                                                                                                                                                                                                                                                                                                                                                                                                                                                                                                                                                                                                                                                                                                                                                                                                                                                                                                                                                                                                                                                                                                                                                                                                                                                                                                                                                                                                                                                                                                                                                                                                                                                          | 2.719156 | 0.000000 |          |          |   |   |     |          |  |  |  |  |     |          |          |  |  |  |     |          |          |          |  |  |     |          |          |          |          |  |      |          |          |          |          |          |      |          |          |          |          |          |      |          |          |          |          |          |      |          |          |          |          |          |     |          |          |          |          |          |       |          |          |          |          |          |  |   |   |   |   |    |      |          |  |  |  |  |      |          |          |  |  |  |      |          |          |          |  |  |     |          |          |          |          |  |       |          |          |          |          |          |
| 4 B                                                                                                                               | 1.748677                                                                                                                                                                                                                                                                                                                                                                                                                                                                                                                                                                                                                                                                                                                                                                                                                                                                                                                                                                                                                                                                                                                                                                                                                                                                                                                                                                                                                                                                                                                                                                                                                                                                                                                          | 1.839151 | 2.889244 | 0.000000 |          |   |   |     |          |  |  |  |  |     |          |          |  |  |  |     |          |          |          |  |  |     |          |          |          |          |  |      |          |          |          |          |          |      |          |          |          |          |          |      |          |          |          |          |          |      |          |          |          |          |          |     |          |          |          |          |          |       |          |          |          |          |          |  |   |   |   |   |    |      |          |  |  |  |  |      |          |          |  |  |  |      |          |          |          |  |  |     |          |          |          |          |  |       |          |          |          |          |          |
| 5 B                                                                                                                               | 2.914655                                                                                                                                                                                                                                                                                                                                                                                                                                                                                                                                                                                                                                                                                                                                                                                                                                                                                                                                                                                                                                                                                                                                                                                                                                                                                                                                                                                                                                                                                                                                                                                                                                                                                                                          | 3.003423 | 1.789502 | 2.966391 | 0.000000 |   |   |     |          |  |  |  |  |     |          |          |  |  |  |     |          |          |          |  |  |     |          |          |          |          |  |      |          |          |          |          |          |      |          |          |          |          |          |      |          |          |          |          |          |      |          |          |          |          |          |     |          |          |          |          |          |       |          |          |          |          |          |  |   |   |   |   |    |      |          |  |  |  |  |      |          |          |  |  |  |      |          |          |          |  |  |     |          |          |          |          |  |       |          |          |          |          |          |
| 6 B                                                                                                                               | 3.627249                                                                                                                                                                                                                                                                                                                                                                                                                                                                                                                                                                                                                                                                                                                                                                                                                                                                                                                                                                                                                                                                                                                                                                                                                                                                                                                                                                                                                                                                                                                                                                                                                                                                                                                          | 1.841428 | 3.681823 | 3.079926 | 3.116466 |   |   |     |          |  |  |  |  |     |          |          |  |  |  |     |          |          |          |  |  |     |          |          |          |          |  |      |          |          |          |          |          |      |          |          |          |          |          |      |          |          |          |          |          |      |          |          |          |          |          |     |          |          |          |          |          |       |          |          |          |          |          |  |   |   |   |   |    |      |          |  |  |  |  |      |          |          |  |  |  |      |          |          |          |  |  |     |          |          |          |          |  |       |          |          |          |          |          |
| 7 Ru                                                                                                                              | 3.152953                                                                                                                                                                                                                                                                                                                                                                                                                                                                                                                                                                                                                                                                                                                                                                                                                                                                                                                                                                                                                                                                                                                                                                                                                                                                                                                                                                                                                                                                                                                                                                                                                                                                                                                          | 2.305427 | 2.312358 | 3.521707 | 2.129254 |   |   |     |          |  |  |  |  |     |          |          |  |  |  |     |          |          |          |  |  |     |          |          |          |          |  |      |          |          |          |          |          |      |          |          |          |          |          |      |          |          |          |          |          |      |          |          |          |          |          |     |          |          |          |          |          |       |          |          |          |          |          |  |   |   |   |   |    |      |          |  |  |  |  |      |          |          |  |  |  |      |          |          |          |  |  |     |          |          |          |          |  |       |          |          |          |          |          |
| 8 B                                                                                                                               | 1.784418                                                                                                                                                                                                                                                                                                                                                                                                                                                                                                                                                                                                                                                                                                                                                                                                                                                                                                                                                                                                                                                                                                                                                                                                                                                                                                                                                                                                                                                                                                                                                                                                                                                                                                                          | 2.719065 | 1.776400 | 1.756515 | 1.789525 |   |   |     |          |  |  |  |  |     |          |          |  |  |  |     |          |          |          |  |  |     |          |          |          |          |  |      |          |          |          |          |          |      |          |          |          |          |          |      |          |          |          |          |          |      |          |          |          |          |          |     |          |          |          |          |          |       |          |          |          |          |          |  |   |   |   |   |    |      |          |  |  |  |  |      |          |          |  |  |  |      |          |          |          |  |  |     |          |          |          |          |  |       |          |          |          |          |          |
| 9 B                                                                                                                               | 1.748677                                                                                                                                                                                                                                                                                                                                                                                                                                                                                                                                                                                                                                                                                                                                                                                                                                                                                                                                                                                                                                                                                                                                                                                                                                                                                                                                                                                                                                                                                                                                                                                                                                                                                                                          | 1.839151 | 1.756609 | 2.962200 | 2.966391 |   |   |     |          |  |  |  |  |     |          |          |  |  |  |     |          |          |          |  |  |     |          |          |          |          |  |      |          |          |          |          |          |      |          |          |          |          |          |      |          |          |          |          |          |      |          |          |          |          |          |     |          |          |          |          |          |       |          |          |          |          |          |  |   |   |   |   |    |      |          |  |  |  |  |      |          |          |  |  |  |      |          |          |          |  |  |     |          |          |          |          |  |       |          |          |          |          |          |
| 10 Ru                                                                                                                             | 3.152953                                                                                                                                                                                                                                                                                                                                                                                                                                                                                                                                                                                                                                                                                                                                                                                                                                                                                                                                                                                                                                                                                                                                                                                                                                                                                                                                                                                                                                                                                                                                                                                                                                                                                                                          | 2.305427 | 3.204425 | 2.048400 | 2.129254 |   |   |     |          |  |  |  |  |     |          |          |  |  |  |     |          |          |          |  |  |     |          |          |          |          |  |      |          |          |          |          |          |      |          |          |          |          |          |      |          |          |          |          |          |      |          |          |          |          |          |     |          |          |          |          |          |       |          |          |          |          |          |  |   |   |   |   |    |      |          |  |  |  |  |      |          |          |  |  |  |      |          |          |          |  |  |     |          |          |          |          |  |       |          |          |          |          |          |
|                                                                                                                                   | 6                                                                                                                                                                                                                                                                                                                                                                                                                                                                                                                                                                                                                                                                                                                                                                                                                                                                                                                                                                                                                                                                                                                                                                                                                                                                                                                                                                                                                                                                                                                                                                                                                                                                                                                                 | 7        | 8        | 9        | 10       |   |   |     |          |  |  |  |  |     |          |          |  |  |  |     |          |          |          |  |  |     |          |          |          |          |  |      |          |          |          |          |          |      |          |          |          |          |          |      |          |          |          |          |          |      |          |          |          |          |          |     |          |          |          |          |          |       |          |          |          |          |          |  |   |   |   |   |    |      |          |  |  |  |  |      |          |          |  |  |  |      |          |          |          |  |  |     |          |          |          |          |  |       |          |          |          |          |          |
| 6 B                                                                                                                               | 0.000000                                                                                                                                                                                                                                                                                                                                                                                                                                                                                                                                                                                                                                                                                                                                                                                                                                                                                                                                                                                                                                                                                                                                                                                                                                                                                                                                                                                                                                                                                                                                                                                                                                                                                                                          |          |          |          |          |   |   |     |          |  |  |  |  |     |          |          |  |  |  |     |          |          |          |  |  |     |          |          |          |          |  |      |          |          |          |          |          |      |          |          |          |          |          |      |          |          |          |          |          |      |          |          |          |          |          |     |          |          |          |          |          |       |          |          |          |          |          |  |   |   |   |   |    |      |          |  |  |  |  |      |          |          |  |  |  |      |          |          |          |  |  |     |          |          |          |          |  |       |          |          |          |          |          |
| 7 Ru                                                                                                                              | 2.044644                                                                                                                                                                                                                                                                                                                                                                                                                                                                                                                                                                                                                                                                                                                                                                                                                                                                                                                                                                                                                                                                                                                                                                                                                                                                                                                                                                                                                                                                                                                                                                                                                                                                                                                          | 0.000000 |          |          |          |   |   |     |          |  |  |  |  |     |          |          |  |  |  |     |          |          |          |  |  |     |          |          |          |          |  |      |          |          |          |          |          |      |          |          |          |          |          |      |          |          |          |          |          |      |          |          |          |          |          |     |          |          |          |          |          |       |          |          |          |          |          |  |   |   |   |   |    |      |          |  |  |  |  |      |          |          |  |  |  |      |          |          |          |  |  |     |          |          |          |          |  |       |          |          |          |          |          |
| 8 B                                                                                                                               | 3.681754                                                                                                                                                                                                                                                                                                                                                                                                                                                                                                                                                                                                                                                                                                                                                                                                                                                                                                                                                                                                                                                                                                                                                                                                                                                                                                                                                                                                                                                                                                                                                                                                                                                                                                                          | 3.204389 | 0.000000 |          |          |   |   |     |          |  |  |  |  |     |          |          |  |  |  |     |          |          |          |  |  |     |          |          |          |          |  |      |          |          |          |          |          |      |          |          |          |          |          |      |          |          |          |          |          |      |          |          |          |          |          |     |          |          |          |          |          |       |          |          |          |          |          |  |   |   |   |   |    |      |          |  |  |  |  |      |          |          |  |  |  |      |          |          |          |  |  |     |          |          |          |          |  |       |          |          |          |          |          |
| 9 B                                                                                                                               | 3.079926                                                                                                                                                                                                                                                                                                                                                                                                                                                                                                                                                                                                                                                                                                                                                                                                                                                                                                                                                                                                                                                                                                                                                                                                                                                                                                                                                                                                                                                                                                                                                                                                                                                                                                                          | 2.048400 | 2.889186 | 0.000000 |          |   |   |     |          |  |  |  |  |     |          |          |  |  |  |     |          |          |          |  |  |     |          |          |          |          |  |      |          |          |          |          |          |      |          |          |          |          |          |      |          |          |          |          |          |      |          |          |          |          |          |     |          |          |          |          |          |       |          |          |          |          |          |  |   |   |   |   |    |      |          |  |  |  |  |      |          |          |  |  |  |      |          |          |          |  |  |     |          |          |          |          |  |       |          |          |          |          |          |
| 10 Ru                                                                                                                             | 2.044644                                                                                                                                                                                                                                                                                                                                                                                                                                                                                                                                                                                                                                                                                                                                                                                                                                                                                                                                                                                                                                                                                                                                                                                                                                                                                                                                                                                                                                                                                                                                                                                                                                                                                                                          | 2.770400 | 2.312309 | 3.521707 | 0.000000 |   |   |     |          |  |  |  |  |     |          |          |  |  |  |     |          |          |          |  |  |     |          |          |          |          |  |      |          |          |          |          |          |      |          |          |          |          |          |      |          |          |          |          |          |      |          |          |          |          |          |     |          |          |          |          |          |       |          |          |          |          |          |  |   |   |   |   |    |      |          |  |  |  |  |      |          |          |  |  |  |      |          |          |          |  |  |     |          |          |          |          |  |       |          |          |          |          |          |
|  <p><b>2. -780.70044535 +8.4</b></p>            | <table border="1"> <thead> <tr> <th></th> <th>1</th> <th>2</th> <th>3</th> <th>4</th> <th>5</th> </tr> </thead> <tbody> <tr><td>1 B</td><td>0.000000</td><td></td><td></td><td></td><td></td></tr> <tr><td>2 B</td><td>1.771702</td><td>0.000000</td><td></td><td></td><td></td></tr> <tr><td>3 B</td><td>2.730030</td><td>2.094400</td><td>0.000000</td><td></td><td></td></tr> <tr><td>4 B</td><td>1.742265</td><td>2.903174</td><td>2.903311</td><td>0.000000</td><td></td></tr> <tr><td>5 Ru</td><td>3.269313</td><td>3.250771</td><td>2.181228</td><td>2.218641</td><td>0.000000</td></tr> <tr><td>6 Ru</td><td>2.230392</td><td>2.181209</td><td>3.250792</td><td>2.218479</td><td>2.774000</td></tr> <tr><td>7 B</td><td>2.989497</td><td>1.885165</td><td>1.885018</td><td>3.046145</td><td>2.098237</td></tr> <tr><td>8 B</td><td>2.059600</td><td>2.729900</td><td>1.771790</td><td>1.742238</td><td>2.230342</td></tr> <tr><td>9 B</td><td>1.790589</td><td>1.693738</td><td>1.693824</td><td>2.841817</td><td>3.366988</td></tr> <tr><td>10 B</td><td>3.135571</td><td>3.727554</td><td>3.727680</td><td>1.733940</td><td>2.067834</td></tr> <tr> <td></td> <td>6</td> <td>7</td> <td>8</td> <td>9</td> <td>10</td> </tr> <tr><td>6 Ru</td><td>0.000000</td><td></td><td></td><td></td><td></td></tr> <tr><td>7 B</td><td>2.098402</td><td>0.000000</td><td></td><td></td><td></td></tr> <tr><td>8 B</td><td>3.269148</td><td>2.989340</td><td>0.000000</td><td></td><td></td></tr> <tr><td>9 B</td><td>3.366948</td><td>2.883868</td><td>1.790640</td><td>0.000000</td><td></td></tr> <tr><td>10 B</td><td>2.067606</td><td>3.069732</td><td>3.135532</td><td>4.216587</td><td>0.000000</td></tr> </tbody> </table>  |          | 1        | 2        | 3        | 4 | 5 | 1 B | 0.000000 |  |  |  |  | 2 B | 1.771702 | 0.000000 |  |  |  | 3 B | 2.730030 | 2.094400 | 0.000000 |  |  | 4 B | 1.742265 | 2.903174 | 2.903311 | 0.000000 |  | 5 Ru | 3.269313 | 3.250771 | 2.181228 | 2.218641 | 0.000000 | 6 Ru | 2.230392 | 2.181209 | 3.250792 | 2.218479 | 2.774000 | 7 B  | 2.989497 | 1.885165 | 1.885018 | 3.046145 | 2.098237 | 8 B  | 2.059600 | 2.729900 | 1.771790 | 1.742238 | 2.230342 | 9 B | 1.790589 | 1.693738 | 1.693824 | 2.841817 | 3.366988 | 10 B  | 3.135571 | 3.727554 | 3.727680 | 1.733940 | 2.067834 |  | 6 | 7 | 8 | 9 | 10 | 6 Ru | 0.000000 |  |  |  |  | 7 B  | 2.098402 | 0.000000 |  |  |  | 8 B  | 3.269148 | 2.989340 | 0.000000 |  |  | 9 B | 3.366948 | 2.883868 | 1.790640 | 0.000000 |  | 10 B  | 2.067606 | 3.069732 | 3.135532 | 4.216587 | 0.000000 |
|                                                                                                                                   | 1                                                                                                                                                                                                                                                                                                                                                                                                                                                                                                                                                                                                                                                                                                                                                                                                                                                                                                                                                                                                                                                                                                                                                                                                                                                                                                                                                                                                                                                                                                                                                                                                                                                                                                                                 | 2        | 3        | 4        | 5        |   |   |     |          |  |  |  |  |     |          |          |  |  |  |     |          |          |          |  |  |     |          |          |          |          |  |      |          |          |          |          |          |      |          |          |          |          |          |      |          |          |          |          |          |      |          |          |          |          |          |     |          |          |          |          |          |       |          |          |          |          |          |  |   |   |   |   |    |      |          |  |  |  |  |      |          |          |  |  |  |      |          |          |          |  |  |     |          |          |          |          |  |       |          |          |          |          |          |
| 1 B                                                                                                                               | 0.000000                                                                                                                                                                                                                                                                                                                                                                                                                                                                                                                                                                                                                                                                                                                                                                                                                                                                                                                                                                                                                                                                                                                                                                                                                                                                                                                                                                                                                                                                                                                                                                                                                                                                                                                          |          |          |          |          |   |   |     |          |  |  |  |  |     |          |          |  |  |  |     |          |          |          |  |  |     |          |          |          |          |  |      |          |          |          |          |          |      |          |          |          |          |          |      |          |          |          |          |          |      |          |          |          |          |          |     |          |          |          |          |          |       |          |          |          |          |          |  |   |   |   |   |    |      |          |  |  |  |  |      |          |          |  |  |  |      |          |          |          |  |  |     |          |          |          |          |  |       |          |          |          |          |          |
| 2 B                                                                                                                               | 1.771702                                                                                                                                                                                                                                                                                                                                                                                                                                                                                                                                                                                                                                                                                                                                                                                                                                                                                                                                                                                                                                                                                                                                                                                                                                                                                                                                                                                                                                                                                                                                                                                                                                                                                                                          | 0.000000 |          |          |          |   |   |     |          |  |  |  |  |     |          |          |  |  |  |     |          |          |          |  |  |     |          |          |          |          |  |      |          |          |          |          |          |      |          |          |          |          |          |      |          |          |          |          |          |      |          |          |          |          |          |     |          |          |          |          |          |       |          |          |          |          |          |  |   |   |   |   |    |      |          |  |  |  |  |      |          |          |  |  |  |      |          |          |          |  |  |     |          |          |          |          |  |       |          |          |          |          |          |
| 3 B                                                                                                                               | 2.730030                                                                                                                                                                                                                                                                                                                                                                                                                                                                                                                                                                                                                                                                                                                                                                                                                                                                                                                                                                                                                                                                                                                                                                                                                                                                                                                                                                                                                                                                                                                                                                                                                                                                                                                          | 2.094400 | 0.000000 |          |          |   |   |     |          |  |  |  |  |     |          |          |  |  |  |     |          |          |          |  |  |     |          |          |          |          |  |      |          |          |          |          |          |      |          |          |          |          |          |      |          |          |          |          |          |      |          |          |          |          |          |     |          |          |          |          |          |       |          |          |          |          |          |  |   |   |   |   |    |      |          |  |  |  |  |      |          |          |  |  |  |      |          |          |          |  |  |     |          |          |          |          |  |       |          |          |          |          |          |
| 4 B                                                                                                                               | 1.742265                                                                                                                                                                                                                                                                                                                                                                                                                                                                                                                                                                                                                                                                                                                                                                                                                                                                                                                                                                                                                                                                                                                                                                                                                                                                                                                                                                                                                                                                                                                                                                                                                                                                                                                          | 2.903174 | 2.903311 | 0.000000 |          |   |   |     |          |  |  |  |  |     |          |          |  |  |  |     |          |          |          |  |  |     |          |          |          |          |  |      |          |          |          |          |          |      |          |          |          |          |          |      |          |          |          |          |          |      |          |          |          |          |          |     |          |          |          |          |          |       |          |          |          |          |          |  |   |   |   |   |    |      |          |  |  |  |  |      |          |          |  |  |  |      |          |          |          |  |  |     |          |          |          |          |  |       |          |          |          |          |          |
| 5 Ru                                                                                                                              | 3.269313                                                                                                                                                                                                                                                                                                                                                                                                                                                                                                                                                                                                                                                                                                                                                                                                                                                                                                                                                                                                                                                                                                                                                                                                                                                                                                                                                                                                                                                                                                                                                                                                                                                                                                                          | 3.250771 | 2.181228 | 2.218641 | 0.000000 |   |   |     |          |  |  |  |  |     |          |          |  |  |  |     |          |          |          |  |  |     |          |          |          |          |  |      |          |          |          |          |          |      |          |          |          |          |          |      |          |          |          |          |          |      |          |          |          |          |          |     |          |          |          |          |          |       |          |          |          |          |          |  |   |   |   |   |    |      |          |  |  |  |  |      |          |          |  |  |  |      |          |          |          |  |  |     |          |          |          |          |  |       |          |          |          |          |          |
| 6 Ru                                                                                                                              | 2.230392                                                                                                                                                                                                                                                                                                                                                                                                                                                                                                                                                                                                                                                                                                                                                                                                                                                                                                                                                                                                                                                                                                                                                                                                                                                                                                                                                                                                                                                                                                                                                                                                                                                                                                                          | 2.181209 | 3.250792 | 2.218479 | 2.774000 |   |   |     |          |  |  |  |  |     |          |          |  |  |  |     |          |          |          |  |  |     |          |          |          |          |  |      |          |          |          |          |          |      |          |          |          |          |          |      |          |          |          |          |          |      |          |          |          |          |          |     |          |          |          |          |          |       |          |          |          |          |          |  |   |   |   |   |    |      |          |  |  |  |  |      |          |          |  |  |  |      |          |          |          |  |  |     |          |          |          |          |  |       |          |          |          |          |          |
| 7 B                                                                                                                               | 2.989497                                                                                                                                                                                                                                                                                                                                                                                                                                                                                                                                                                                                                                                                                                                                                                                                                                                                                                                                                                                                                                                                                                                                                                                                                                                                                                                                                                                                                                                                                                                                                                                                                                                                                                                          | 1.885165 | 1.885018 | 3.046145 | 2.098237 |   |   |     |          |  |  |  |  |     |          |          |  |  |  |     |          |          |          |  |  |     |          |          |          |          |  |      |          |          |          |          |          |      |          |          |          |          |          |      |          |          |          |          |          |      |          |          |          |          |          |     |          |          |          |          |          |       |          |          |          |          |          |  |   |   |   |   |    |      |          |  |  |  |  |      |          |          |  |  |  |      |          |          |          |  |  |     |          |          |          |          |  |       |          |          |          |          |          |
| 8 B                                                                                                                               | 2.059600                                                                                                                                                                                                                                                                                                                                                                                                                                                                                                                                                                                                                                                                                                                                                                                                                                                                                                                                                                                                                                                                                                                                                                                                                                                                                                                                                                                                                                                                                                                                                                                                                                                                                                                          | 2.729900 | 1.771790 | 1.742238 | 2.230342 |   |   |     |          |  |  |  |  |     |          |          |  |  |  |     |          |          |          |  |  |     |          |          |          |          |  |      |          |          |          |          |          |      |          |          |          |          |          |      |          |          |          |          |          |      |          |          |          |          |          |     |          |          |          |          |          |       |          |          |          |          |          |  |   |   |   |   |    |      |          |  |  |  |  |      |          |          |  |  |  |      |          |          |          |  |  |     |          |          |          |          |  |       |          |          |          |          |          |
| 9 B                                                                                                                               | 1.790589                                                                                                                                                                                                                                                                                                                                                                                                                                                                                                                                                                                                                                                                                                                                                                                                                                                                                                                                                                                                                                                                                                                                                                                                                                                                                                                                                                                                                                                                                                                                                                                                                                                                                                                          | 1.693738 | 1.693824 | 2.841817 | 3.366988 |   |   |     |          |  |  |  |  |     |          |          |  |  |  |     |          |          |          |  |  |     |          |          |          |          |  |      |          |          |          |          |          |      |          |          |          |          |          |      |          |          |          |          |          |      |          |          |          |          |          |     |          |          |          |          |          |       |          |          |          |          |          |  |   |   |   |   |    |      |          |  |  |  |  |      |          |          |  |  |  |      |          |          |          |  |  |     |          |          |          |          |  |       |          |          |          |          |          |
| 10 B                                                                                                                              | 3.135571                                                                                                                                                                                                                                                                                                                                                                                                                                                                                                                                                                                                                                                                                                                                                                                                                                                                                                                                                                                                                                                                                                                                                                                                                                                                                                                                                                                                                                                                                                                                                                                                                                                                                                                          | 3.727554 | 3.727680 | 1.733940 | 2.067834 |   |   |     |          |  |  |  |  |     |          |          |  |  |  |     |          |          |          |  |  |     |          |          |          |          |  |      |          |          |          |          |          |      |          |          |          |          |          |      |          |          |          |          |          |      |          |          |          |          |          |     |          |          |          |          |          |       |          |          |          |          |          |  |   |   |   |   |    |      |          |  |  |  |  |      |          |          |  |  |  |      |          |          |          |  |  |     |          |          |          |          |  |       |          |          |          |          |          |
|                                                                                                                                   | 6                                                                                                                                                                                                                                                                                                                                                                                                                                                                                                                                                                                                                                                                                                                                                                                                                                                                                                                                                                                                                                                                                                                                                                                                                                                                                                                                                                                                                                                                                                                                                                                                                                                                                                                                 | 7        | 8        | 9        | 10       |   |   |     |          |  |  |  |  |     |          |          |  |  |  |     |          |          |          |  |  |     |          |          |          |          |  |      |          |          |          |          |          |      |          |          |          |          |          |      |          |          |          |          |          |      |          |          |          |          |          |     |          |          |          |          |          |       |          |          |          |          |          |  |   |   |   |   |    |      |          |  |  |  |  |      |          |          |  |  |  |      |          |          |          |  |  |     |          |          |          |          |  |       |          |          |          |          |          |
| 6 Ru                                                                                                                              | 0.000000                                                                                                                                                                                                                                                                                                                                                                                                                                                                                                                                                                                                                                                                                                                                                                                                                                                                                                                                                                                                                                                                                                                                                                                                                                                                                                                                                                                                                                                                                                                                                                                                                                                                                                                          |          |          |          |          |   |   |     |          |  |  |  |  |     |          |          |  |  |  |     |          |          |          |  |  |     |          |          |          |          |  |      |          |          |          |          |          |      |          |          |          |          |          |      |          |          |          |          |          |      |          |          |          |          |          |     |          |          |          |          |          |       |          |          |          |          |          |  |   |   |   |   |    |      |          |  |  |  |  |      |          |          |  |  |  |      |          |          |          |  |  |     |          |          |          |          |  |       |          |          |          |          |          |
| 7 B                                                                                                                               | 2.098402                                                                                                                                                                                                                                                                                                                                                                                                                                                                                                                                                                                                                                                                                                                                                                                                                                                                                                                                                                                                                                                                                                                                                                                                                                                                                                                                                                                                                                                                                                                                                                                                                                                                                                                          | 0.000000 |          |          |          |   |   |     |          |  |  |  |  |     |          |          |  |  |  |     |          |          |          |  |  |     |          |          |          |          |  |      |          |          |          |          |          |      |          |          |          |          |          |      |          |          |          |          |          |      |          |          |          |          |          |     |          |          |          |          |          |       |          |          |          |          |          |  |   |   |   |   |    |      |          |  |  |  |  |      |          |          |  |  |  |      |          |          |          |  |  |     |          |          |          |          |  |       |          |          |          |          |          |
| 8 B                                                                                                                               | 3.269148                                                                                                                                                                                                                                                                                                                                                                                                                                                                                                                                                                                                                                                                                                                                                                                                                                                                                                                                                                                                                                                                                                                                                                                                                                                                                                                                                                                                                                                                                                                                                                                                                                                                                                                          | 2.989340 | 0.000000 |          |          |   |   |     |          |  |  |  |  |     |          |          |  |  |  |     |          |          |          |  |  |     |          |          |          |          |  |      |          |          |          |          |          |      |          |          |          |          |          |      |          |          |          |          |          |      |          |          |          |          |          |     |          |          |          |          |          |       |          |          |          |          |          |  |   |   |   |   |    |      |          |  |  |  |  |      |          |          |  |  |  |      |          |          |          |  |  |     |          |          |          |          |  |       |          |          |          |          |          |
| 9 B                                                                                                                               | 3.366948                                                                                                                                                                                                                                                                                                                                                                                                                                                                                                                                                                                                                                                                                                                                                                                                                                                                                                                                                                                                                                                                                                                                                                                                                                                                                                                                                                                                                                                                                                                                                                                                                                                                                                                          | 2.883868 | 1.790640 | 0.000000 |          |   |   |     |          |  |  |  |  |     |          |          |  |  |  |     |          |          |          |  |  |     |          |          |          |          |  |      |          |          |          |          |          |      |          |          |          |          |          |      |          |          |          |          |          |      |          |          |          |          |          |     |          |          |          |          |          |       |          |          |          |          |          |  |   |   |   |   |    |      |          |  |  |  |  |      |          |          |  |  |  |      |          |          |          |  |  |     |          |          |          |          |  |       |          |          |          |          |          |
| 10 B                                                                                                                              | 2.067606                                                                                                                                                                                                                                                                                                                                                                                                                                                                                                                                                                                                                                                                                                                                                                                                                                                                                                                                                                                                                                                                                                                                                                                                                                                                                                                                                                                                                                                                                                                                                                                                                                                                                                                          | 3.069732 | 3.135532 | 4.216587 | 0.000000 |   |   |     |          |  |  |  |  |     |          |          |  |  |  |     |          |          |          |  |  |     |          |          |          |          |  |      |          |          |          |          |          |      |          |          |          |          |          |      |          |          |          |          |          |      |          |          |          |          |          |     |          |          |          |          |          |       |          |          |          |          |          |  |   |   |   |   |    |      |          |  |  |  |  |      |          |          |  |  |  |      |          |          |          |  |  |     |          |          |          |          |  |       |          |          |          |          |          |
|  <p><b>3. -780.69577525 +11.3</b></p>          | <table border="1"> <thead> <tr> <th></th> <th>1</th> <th>2</th> <th>3</th> <th>4</th> <th>5</th> </tr> </thead> <tbody> <tr><td>1 B</td><td>0.000000</td><td></td><td></td><td></td><td></td></tr> <tr><td>2 B</td><td>1.893184</td><td>0.000000</td><td></td><td></td><td></td></tr> <tr><td>3 B</td><td>1.854166</td><td>1.824208</td><td>0.000000</td><td></td><td></td></tr> <tr><td>4 B</td><td>1.775598</td><td>2.972903</td><td>1.677577</td><td>0.000000</td><td></td></tr> <tr><td>5 B</td><td>1.768080</td><td>3.104301</td><td>2.776224</td><td>1.699887</td><td>0.000000</td></tr> <tr><td>6 B</td><td>3.066941</td><td>1.787588</td><td>2.805276</td><td>3.639080</td><td>3.363179</td></tr> <tr><td>7 B</td><td>2.958759</td><td>1.705933</td><td>1.686609</td><td>3.047535</td><td>3.618746</td></tr> <tr><td>8 Ru</td><td>2.928795</td><td>2.948920</td><td>2.345165</td><td>2.216022</td><td>2.310723</td></tr> <tr><td>9 B</td><td>3.143276</td><td>3.662731</td><td>3.746539</td><td>3.078279</td><td>1.771581</td></tr> <tr><td>10 Ru</td><td>2.239570</td><td>2.263184</td><td>3.248766</td><td>3.280500</td><td>2.164691</td></tr> <tr> <td></td> <td>6</td> <td>7</td> <td>8</td> <td>9</td> <td>10</td> </tr> <tr><td>6 B</td><td>0.000000</td><td></td><td></td><td></td><td></td></tr> <tr><td>7 B</td><td>1.717589</td><td>0.000000</td><td></td><td></td><td></td></tr> <tr><td>8 Ru</td><td>2.366057</td><td>2.258033</td><td>0.000000</td><td></td><td></td></tr> <tr><td>9 B</td><td>2.980250</td><td>3.832337</td><td>2.110266</td><td>0.000000</td><td></td></tr> <tr><td>10 Ru</td><td>2.061819</td><td>3.216495</td><td>2.826705</td><td>2.022263</td><td>0.000000</td></tr> </tbody> </table> |          | 1        | 2        | 3        | 4 | 5 | 1 B | 0.000000 |  |  |  |  | 2 B | 1.893184 | 0.000000 |  |  |  | 3 B | 1.854166 | 1.824208 | 0.000000 |  |  | 4 B | 1.775598 | 2.972903 | 1.677577 | 0.000000 |  | 5 B  | 1.768080 | 3.104301 | 2.776224 | 1.699887 | 0.000000 | 6 B  | 3.066941 | 1.787588 | 2.805276 | 3.639080 | 3.363179 | 7 B  | 2.958759 | 1.705933 | 1.686609 | 3.047535 | 3.618746 | 8 Ru | 2.928795 | 2.948920 | 2.345165 | 2.216022 | 2.310723 | 9 B | 3.143276 | 3.662731 | 3.746539 | 3.078279 | 1.771581 | 10 Ru | 2.239570 | 2.263184 | 3.248766 | 3.280500 | 2.164691 |  | 6 | 7 | 8 | 9 | 10 | 6 B  | 0.000000 |  |  |  |  | 7 B  | 1.717589 | 0.000000 |  |  |  | 8 Ru | 2.366057 | 2.258033 | 0.000000 |  |  | 9 B | 2.980250 | 3.832337 | 2.110266 | 0.000000 |  | 10 Ru | 2.061819 | 3.216495 | 2.826705 | 2.022263 | 0.000000 |
|                                                                                                                                   | 1                                                                                                                                                                                                                                                                                                                                                                                                                                                                                                                                                                                                                                                                                                                                                                                                                                                                                                                                                                                                                                                                                                                                                                                                                                                                                                                                                                                                                                                                                                                                                                                                                                                                                                                                 | 2        | 3        | 4        | 5        |   |   |     |          |  |  |  |  |     |          |          |  |  |  |     |          |          |          |  |  |     |          |          |          |          |  |      |          |          |          |          |          |      |          |          |          |          |          |      |          |          |          |          |          |      |          |          |          |          |          |     |          |          |          |          |          |       |          |          |          |          |          |  |   |   |   |   |    |      |          |  |  |  |  |      |          |          |  |  |  |      |          |          |          |  |  |     |          |          |          |          |  |       |          |          |          |          |          |
| 1 B                                                                                                                               | 0.000000                                                                                                                                                                                                                                                                                                                                                                                                                                                                                                                                                                                                                                                                                                                                                                                                                                                                                                                                                                                                                                                                                                                                                                                                                                                                                                                                                                                                                                                                                                                                                                                                                                                                                                                          |          |          |          |          |   |   |     |          |  |  |  |  |     |          |          |  |  |  |     |          |          |          |  |  |     |          |          |          |          |  |      |          |          |          |          |          |      |          |          |          |          |          |      |          |          |          |          |          |      |          |          |          |          |          |     |          |          |          |          |          |       |          |          |          |          |          |  |   |   |   |   |    |      |          |  |  |  |  |      |          |          |  |  |  |      |          |          |          |  |  |     |          |          |          |          |  |       |          |          |          |          |          |
| 2 B                                                                                                                               | 1.893184                                                                                                                                                                                                                                                                                                                                                                                                                                                                                                                                                                                                                                                                                                                                                                                                                                                                                                                                                                                                                                                                                                                                                                                                                                                                                                                                                                                                                                                                                                                                                                                                                                                                                                                          | 0.000000 |          |          |          |   |   |     |          |  |  |  |  |     |          |          |  |  |  |     |          |          |          |  |  |     |          |          |          |          |  |      |          |          |          |          |          |      |          |          |          |          |          |      |          |          |          |          |          |      |          |          |          |          |          |     |          |          |          |          |          |       |          |          |          |          |          |  |   |   |   |   |    |      |          |  |  |  |  |      |          |          |  |  |  |      |          |          |          |  |  |     |          |          |          |          |  |       |          |          |          |          |          |
| 3 B                                                                                                                               | 1.854166                                                                                                                                                                                                                                                                                                                                                                                                                                                                                                                                                                                                                                                                                                                                                                                                                                                                                                                                                                                                                                                                                                                                                                                                                                                                                                                                                                                                                                                                                                                                                                                                                                                                                                                          | 1.824208 | 0.000000 |          |          |   |   |     |          |  |  |  |  |     |          |          |  |  |  |     |          |          |          |  |  |     |          |          |          |          |  |      |          |          |          |          |          |      |          |          |          |          |          |      |          |          |          |          |          |      |          |          |          |          |          |     |          |          |          |          |          |       |          |          |          |          |          |  |   |   |   |   |    |      |          |  |  |  |  |      |          |          |  |  |  |      |          |          |          |  |  |     |          |          |          |          |  |       |          |          |          |          |          |
| 4 B                                                                                                                               | 1.775598                                                                                                                                                                                                                                                                                                                                                                                                                                                                                                                                                                                                                                                                                                                                                                                                                                                                                                                                                                                                                                                                                                                                                                                                                                                                                                                                                                                                                                                                                                                                                                                                                                                                                                                          | 2.972903 | 1.677577 | 0.000000 |          |   |   |     |          |  |  |  |  |     |          |          |  |  |  |     |          |          |          |  |  |     |          |          |          |          |  |      |          |          |          |          |          |      |          |          |          |          |          |      |          |          |          |          |          |      |          |          |          |          |          |     |          |          |          |          |          |       |          |          |          |          |          |  |   |   |   |   |    |      |          |  |  |  |  |      |          |          |  |  |  |      |          |          |          |  |  |     |          |          |          |          |  |       |          |          |          |          |          |
| 5 B                                                                                                                               | 1.768080                                                                                                                                                                                                                                                                                                                                                                                                                                                                                                                                                                                                                                                                                                                                                                                                                                                                                                                                                                                                                                                                                                                                                                                                                                                                                                                                                                                                                                                                                                                                                                                                                                                                                                                          | 3.104301 | 2.776224 | 1.699887 | 0.000000 |   |   |     |          |  |  |  |  |     |          |          |  |  |  |     |          |          |          |  |  |     |          |          |          |          |  |      |          |          |          |          |          |      |          |          |          |          |          |      |          |          |          |          |          |      |          |          |          |          |          |     |          |          |          |          |          |       |          |          |          |          |          |  |   |   |   |   |    |      |          |  |  |  |  |      |          |          |  |  |  |      |          |          |          |  |  |     |          |          |          |          |  |       |          |          |          |          |          |
| 6 B                                                                                                                               | 3.066941                                                                                                                                                                                                                                                                                                                                                                                                                                                                                                                                                                                                                                                                                                                                                                                                                                                                                                                                                                                                                                                                                                                                                                                                                                                                                                                                                                                                                                                                                                                                                                                                                                                                                                                          | 1.787588 | 2.805276 | 3.639080 | 3.363179 |   |   |     |          |  |  |  |  |     |          |          |  |  |  |     |          |          |          |  |  |     |          |          |          |          |  |      |          |          |          |          |          |      |          |          |          |          |          |      |          |          |          |          |          |      |          |          |          |          |          |     |          |          |          |          |          |       |          |          |          |          |          |  |   |   |   |   |    |      |          |  |  |  |  |      |          |          |  |  |  |      |          |          |          |  |  |     |          |          |          |          |  |       |          |          |          |          |          |
| 7 B                                                                                                                               | 2.958759                                                                                                                                                                                                                                                                                                                                                                                                                                                                                                                                                                                                                                                                                                                                                                                                                                                                                                                                                                                                                                                                                                                                                                                                                                                                                                                                                                                                                                                                                                                                                                                                                                                                                                                          | 1.705933 | 1.686609 | 3.047535 | 3.618746 |   |   |     |          |  |  |  |  |     |          |          |  |  |  |     |          |          |          |  |  |     |          |          |          |          |  |      |          |          |          |          |          |      |          |          |          |          |          |      |          |          |          |          |          |      |          |          |          |          |          |     |          |          |          |          |          |       |          |          |          |          |          |  |   |   |   |   |    |      |          |  |  |  |  |      |          |          |  |  |  |      |          |          |          |  |  |     |          |          |          |          |  |       |          |          |          |          |          |
| 8 Ru                                                                                                                              | 2.928795                                                                                                                                                                                                                                                                                                                                                                                                                                                                                                                                                                                                                                                                                                                                                                                                                                                                                                                                                                                                                                                                                                                                                                                                                                                                                                                                                                                                                                                                                                                                                                                                                                                                                                                          | 2.948920 | 2.345165 | 2.216022 | 2.310723 |   |   |     |          |  |  |  |  |     |          |          |  |  |  |     |          |          |          |  |  |     |          |          |          |          |  |      |          |          |          |          |          |      |          |          |          |          |          |      |          |          |          |          |          |      |          |          |          |          |          |     |          |          |          |          |          |       |          |          |          |          |          |  |   |   |   |   |    |      |          |  |  |  |  |      |          |          |  |  |  |      |          |          |          |  |  |     |          |          |          |          |  |       |          |          |          |          |          |
| 9 B                                                                                                                               | 3.143276                                                                                                                                                                                                                                                                                                                                                                                                                                                                                                                                                                                                                                                                                                                                                                                                                                                                                                                                                                                                                                                                                                                                                                                                                                                                                                                                                                                                                                                                                                                                                                                                                                                                                                                          | 3.662731 | 3.746539 | 3.078279 | 1.771581 |   |   |     |          |  |  |  |  |     |          |          |  |  |  |     |          |          |          |  |  |     |          |          |          |          |  |      |          |          |          |          |          |      |          |          |          |          |          |      |          |          |          |          |          |      |          |          |          |          |          |     |          |          |          |          |          |       |          |          |          |          |          |  |   |   |   |   |    |      |          |  |  |  |  |      |          |          |  |  |  |      |          |          |          |  |  |     |          |          |          |          |  |       |          |          |          |          |          |
| 10 Ru                                                                                                                             | 2.239570                                                                                                                                                                                                                                                                                                                                                                                                                                                                                                                                                                                                                                                                                                                                                                                                                                                                                                                                                                                                                                                                                                                                                                                                                                                                                                                                                                                                                                                                                                                                                                                                                                                                                                                          | 2.263184 | 3.248766 | 3.280500 | 2.164691 |   |   |     |          |  |  |  |  |     |          |          |  |  |  |     |          |          |          |  |  |     |          |          |          |          |  |      |          |          |          |          |          |      |          |          |          |          |          |      |          |          |          |          |          |      |          |          |          |          |          |     |          |          |          |          |          |       |          |          |          |          |          |  |   |   |   |   |    |      |          |  |  |  |  |      |          |          |  |  |  |      |          |          |          |  |  |     |          |          |          |          |  |       |          |          |          |          |          |
|                                                                                                                                   | 6                                                                                                                                                                                                                                                                                                                                                                                                                                                                                                                                                                                                                                                                                                                                                                                                                                                                                                                                                                                                                                                                                                                                                                                                                                                                                                                                                                                                                                                                                                                                                                                                                                                                                                                                 | 7        | 8        | 9        | 10       |   |   |     |          |  |  |  |  |     |          |          |  |  |  |     |          |          |          |  |  |     |          |          |          |          |  |      |          |          |          |          |          |      |          |          |          |          |          |      |          |          |          |          |          |      |          |          |          |          |          |     |          |          |          |          |          |       |          |          |          |          |          |  |   |   |   |   |    |      |          |  |  |  |  |      |          |          |  |  |  |      |          |          |          |  |  |     |          |          |          |          |  |       |          |          |          |          |          |
| 6 B                                                                                                                               | 0.000000                                                                                                                                                                                                                                                                                                                                                                                                                                                                                                                                                                                                                                                                                                                                                                                                                                                                                                                                                                                                                                                                                                                                                                                                                                                                                                                                                                                                                                                                                                                                                                                                                                                                                                                          |          |          |          |          |   |   |     |          |  |  |  |  |     |          |          |  |  |  |     |          |          |          |  |  |     |          |          |          |          |  |      |          |          |          |          |          |      |          |          |          |          |          |      |          |          |          |          |          |      |          |          |          |          |          |     |          |          |          |          |          |       |          |          |          |          |          |  |   |   |   |   |    |      |          |  |  |  |  |      |          |          |  |  |  |      |          |          |          |  |  |     |          |          |          |          |  |       |          |          |          |          |          |
| 7 B                                                                                                                               | 1.717589                                                                                                                                                                                                                                                                                                                                                                                                                                                                                                                                                                                                                                                                                                                                                                                                                                                                                                                                                                                                                                                                                                                                                                                                                                                                                                                                                                                                                                                                                                                                                                                                                                                                                                                          | 0.000000 |          |          |          |   |   |     |          |  |  |  |  |     |          |          |  |  |  |     |          |          |          |  |  |     |          |          |          |          |  |      |          |          |          |          |          |      |          |          |          |          |          |      |          |          |          |          |          |      |          |          |          |          |          |     |          |          |          |          |          |       |          |          |          |          |          |  |   |   |   |   |    |      |          |  |  |  |  |      |          |          |  |  |  |      |          |          |          |  |  |     |          |          |          |          |  |       |          |          |          |          |          |
| 8 Ru                                                                                                                              | 2.366057                                                                                                                                                                                                                                                                                                                                                                                                                                                                                                                                                                                                                                                                                                                                                                                                                                                                                                                                                                                                                                                                                                                                                                                                                                                                                                                                                                                                                                                                                                                                                                                                                                                                                                                          | 2.258033 | 0.000000 |          |          |   |   |     |          |  |  |  |  |     |          |          |  |  |  |     |          |          |          |  |  |     |          |          |          |          |  |      |          |          |          |          |          |      |          |          |          |          |          |      |          |          |          |          |          |      |          |          |          |          |          |     |          |          |          |          |          |       |          |          |          |          |          |  |   |   |   |   |    |      |          |  |  |  |  |      |          |          |  |  |  |      |          |          |          |  |  |     |          |          |          |          |  |       |          |          |          |          |          |
| 9 B                                                                                                                               | 2.980250                                                                                                                                                                                                                                                                                                                                                                                                                                                                                                                                                                                                                                                                                                                                                                                                                                                                                                                                                                                                                                                                                                                                                                                                                                                                                                                                                                                                                                                                                                                                                                                                                                                                                                                          | 3.832337 | 2.110266 | 0.000000 |          |   |   |     |          |  |  |  |  |     |          |          |  |  |  |     |          |          |          |  |  |     |          |          |          |          |  |      |          |          |          |          |          |      |          |          |          |          |          |      |          |          |          |          |          |      |          |          |          |          |          |     |          |          |          |          |          |       |          |          |          |          |          |  |   |   |   |   |    |      |          |  |  |  |  |      |          |          |  |  |  |      |          |          |          |  |  |     |          |          |          |          |  |       |          |          |          |          |          |
| 10 Ru                                                                                                                             | 2.061819                                                                                                                                                                                                                                                                                                                                                                                                                                                                                                                                                                                                                                                                                                                                                                                                                                                                                                                                                                                                                                                                                                                                                                                                                                                                                                                                                                                                                                                                                                                                                                                                                                                                                                                          | 3.216495 | 2.826705 | 2.022263 | 0.000000 |   |   |     |          |  |  |  |  |     |          |          |  |  |  |     |          |          |          |  |  |     |          |          |          |          |  |      |          |          |          |          |          |      |          |          |          |          |          |      |          |          |          |          |          |      |          |          |          |          |          |     |          |          |          |          |          |       |          |          |          |          |          |  |   |   |   |   |    |      |          |  |  |  |  |      |          |          |  |  |  |      |          |          |          |  |  |     |          |          |          |          |  |       |          |          |          |          |          |

| 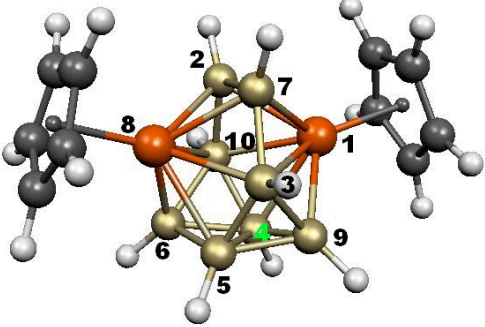 <p>4. -780.68713236 +16.7</p>                | <table border="1"> <thead> <tr> <th></th> <th>1</th> <th>2</th> <th>3</th> <th>4</th> <th>5</th> </tr> </thead> <tbody> <tr><td>1 Ru</td><td>0.000000</td><td></td><td></td><td></td><td></td></tr> <tr><td>2 B</td><td>2.187945</td><td>0.000000</td><td></td><td></td><td></td></tr> <tr><td>3 B</td><td>2.362914</td><td>2.886663</td><td>0.000000</td><td></td><td></td></tr> <tr><td>4 B</td><td>2.313449</td><td>3.106549</td><td>2.757428</td><td>0.000000</td><td></td></tr> <tr><td>5 B</td><td>3.109620</td><td>3.485464</td><td>1.728738</td><td>1.953200</td><td>0.000000</td></tr> <tr><td>6 B</td><td>3.390472</td><td>2.994399</td><td>2.953050</td><td>1.776308</td><td>1.782120</td></tr> <tr><td>7 B</td><td>2.140139</td><td>1.773933</td><td>1.722244</td><td>3.485464</td><td>3.106549</td></tr> <tr><td>8 Ru</td><td>3.313069</td><td>2.140139</td><td>2.251177</td><td>3.109620</td><td>2.313449</td></tr> <tr><td>9 B</td><td>2.065182</td><td>3.548758</td><td>1.757370</td><td>1.782120</td><td>1.776308</td></tr> <tr><td>10 B</td><td>2.251177</td><td>1.722244</td><td>3.036658</td><td>1.728738</td><td>2.757428</td></tr> <tr> <td></td> <td>6</td> <td>7</td> <td>8</td> <td>9</td> <td>10</td> </tr> <tr><td>6 B</td><td>0.000000</td><td></td><td></td><td></td><td></td></tr> <tr><td>7 B</td><td>3.548758</td><td>0.000000</td><td></td><td></td><td></td></tr> <tr><td>8 Ru</td><td>2.065182</td><td>2.187945</td><td>0.000000</td><td></td><td></td></tr> <tr><td>9 B</td><td>2.939430</td><td>2.994399</td><td>3.390472</td><td>0.000000</td><td></td></tr> <tr><td>10 B</td><td>1.757370</td><td>2.886663</td><td>2.362914</td><td>2.953050</td><td>0.000000</td></tr> </tbody> </table>  |          | 1        | 2        | 3        | 4 | 5 | 1 Ru | 0.000000 |  |  |  |  | 2 B | 2.187945 | 0.000000 |  |  |  | 3 B  | 2.362914 | 2.886663 | 0.000000 |  |  | 4 B | 2.313449 | 3.106549 | 2.757428 | 0.000000 |  | 5 B | 3.109620 | 3.485464 | 1.728738 | 1.953200 | 0.000000 | 6 B  | 3.390472 | 2.994399 | 2.953050 | 1.776308 | 1.782120 | 7 B  | 2.140139 | 1.773933 | 1.722244 | 3.485464 | 3.106549 | 8 Ru | 3.313069 | 2.140139 | 2.251177 | 3.109620 | 2.313449 | 9 B | 2.065182 | 3.548758 | 1.757370 | 1.782120 | 1.776308 | 10 B  | 2.251177 | 1.722244 | 3.036658 | 1.728738 | 2.757428 |  | 6 | 7 | 8 | 9 | 10 | 6 B  | 0.000000 |  |  |  |  | 7 B  | 3.548758 | 0.000000 |  |  |  | 8 Ru | 2.065182 | 2.187945 | 0.000000 |  |  | 9 B | 2.939430 | 2.994399 | 3.390472 | 0.000000 |  | 10 B  | 1.757370 | 2.886663 | 2.362914 | 2.953050 | 0.000000 |
|--------------------------------------------------------------------------------------------------------------------------------|-----------------------------------------------------------------------------------------------------------------------------------------------------------------------------------------------------------------------------------------------------------------------------------------------------------------------------------------------------------------------------------------------------------------------------------------------------------------------------------------------------------------------------------------------------------------------------------------------------------------------------------------------------------------------------------------------------------------------------------------------------------------------------------------------------------------------------------------------------------------------------------------------------------------------------------------------------------------------------------------------------------------------------------------------------------------------------------------------------------------------------------------------------------------------------------------------------------------------------------------------------------------------------------------------------------------------------------------------------------------------------------------------------------------------------------------------------------------------------------------------------------------------------------------------------------------------------------------------------------------------------------------------------------------------------------------------------------------------------------|----------|----------|----------|----------|---|---|------|----------|--|--|--|--|-----|----------|----------|--|--|--|------|----------|----------|----------|--|--|-----|----------|----------|----------|----------|--|-----|----------|----------|----------|----------|----------|------|----------|----------|----------|----------|----------|------|----------|----------|----------|----------|----------|------|----------|----------|----------|----------|----------|-----|----------|----------|----------|----------|----------|-------|----------|----------|----------|----------|----------|--|---|---|---|---|----|------|----------|--|--|--|--|------|----------|----------|--|--|--|------|----------|----------|----------|--|--|-----|----------|----------|----------|----------|--|-------|----------|----------|----------|----------|----------|
|                                                                                                                                | 1                                                                                                                                                                                                                                                                                                                                                                                                                                                                                                                                                                                                                                                                                                                                                                                                                                                                                                                                                                                                                                                                                                                                                                                                                                                                                                                                                                                                                                                                                                                                                                                                                                                                                                                                 | 2        | 3        | 4        | 5        |   |   |      |          |  |  |  |  |     |          |          |  |  |  |      |          |          |          |  |  |     |          |          |          |          |  |     |          |          |          |          |          |      |          |          |          |          |          |      |          |          |          |          |          |      |          |          |          |          |          |     |          |          |          |          |          |       |          |          |          |          |          |  |   |   |   |   |    |      |          |  |  |  |  |      |          |          |  |  |  |      |          |          |          |  |  |     |          |          |          |          |  |       |          |          |          |          |          |
| 1 Ru                                                                                                                           | 0.000000                                                                                                                                                                                                                                                                                                                                                                                                                                                                                                                                                                                                                                                                                                                                                                                                                                                                                                                                                                                                                                                                                                                                                                                                                                                                                                                                                                                                                                                                                                                                                                                                                                                                                                                          |          |          |          |          |   |   |      |          |  |  |  |  |     |          |          |  |  |  |      |          |          |          |  |  |     |          |          |          |          |  |     |          |          |          |          |          |      |          |          |          |          |          |      |          |          |          |          |          |      |          |          |          |          |          |     |          |          |          |          |          |       |          |          |          |          |          |  |   |   |   |   |    |      |          |  |  |  |  |      |          |          |  |  |  |      |          |          |          |  |  |     |          |          |          |          |  |       |          |          |          |          |          |
| 2 B                                                                                                                            | 2.187945                                                                                                                                                                                                                                                                                                                                                                                                                                                                                                                                                                                                                                                                                                                                                                                                                                                                                                                                                                                                                                                                                                                                                                                                                                                                                                                                                                                                                                                                                                                                                                                                                                                                                                                          | 0.000000 |          |          |          |   |   |      |          |  |  |  |  |     |          |          |  |  |  |      |          |          |          |  |  |     |          |          |          |          |  |     |          |          |          |          |          |      |          |          |          |          |          |      |          |          |          |          |          |      |          |          |          |          |          |     |          |          |          |          |          |       |          |          |          |          |          |  |   |   |   |   |    |      |          |  |  |  |  |      |          |          |  |  |  |      |          |          |          |  |  |     |          |          |          |          |  |       |          |          |          |          |          |
| 3 B                                                                                                                            | 2.362914                                                                                                                                                                                                                                                                                                                                                                                                                                                                                                                                                                                                                                                                                                                                                                                                                                                                                                                                                                                                                                                                                                                                                                                                                                                                                                                                                                                                                                                                                                                                                                                                                                                                                                                          | 2.886663 | 0.000000 |          |          |   |   |      |          |  |  |  |  |     |          |          |  |  |  |      |          |          |          |  |  |     |          |          |          |          |  |     |          |          |          |          |          |      |          |          |          |          |          |      |          |          |          |          |          |      |          |          |          |          |          |     |          |          |          |          |          |       |          |          |          |          |          |  |   |   |   |   |    |      |          |  |  |  |  |      |          |          |  |  |  |      |          |          |          |  |  |     |          |          |          |          |  |       |          |          |          |          |          |
| 4 B                                                                                                                            | 2.313449                                                                                                                                                                                                                                                                                                                                                                                                                                                                                                                                                                                                                                                                                                                                                                                                                                                                                                                                                                                                                                                                                                                                                                                                                                                                                                                                                                                                                                                                                                                                                                                                                                                                                                                          | 3.106549 | 2.757428 | 0.000000 |          |   |   |      |          |  |  |  |  |     |          |          |  |  |  |      |          |          |          |  |  |     |          |          |          |          |  |     |          |          |          |          |          |      |          |          |          |          |          |      |          |          |          |          |          |      |          |          |          |          |          |     |          |          |          |          |          |       |          |          |          |          |          |  |   |   |   |   |    |      |          |  |  |  |  |      |          |          |  |  |  |      |          |          |          |  |  |     |          |          |          |          |  |       |          |          |          |          |          |
| 5 B                                                                                                                            | 3.109620                                                                                                                                                                                                                                                                                                                                                                                                                                                                                                                                                                                                                                                                                                                                                                                                                                                                                                                                                                                                                                                                                                                                                                                                                                                                                                                                                                                                                                                                                                                                                                                                                                                                                                                          | 3.485464 | 1.728738 | 1.953200 | 0.000000 |   |   |      |          |  |  |  |  |     |          |          |  |  |  |      |          |          |          |  |  |     |          |          |          |          |  |     |          |          |          |          |          |      |          |          |          |          |          |      |          |          |          |          |          |      |          |          |          |          |          |     |          |          |          |          |          |       |          |          |          |          |          |  |   |   |   |   |    |      |          |  |  |  |  |      |          |          |  |  |  |      |          |          |          |  |  |     |          |          |          |          |  |       |          |          |          |          |          |
| 6 B                                                                                                                            | 3.390472                                                                                                                                                                                                                                                                                                                                                                                                                                                                                                                                                                                                                                                                                                                                                                                                                                                                                                                                                                                                                                                                                                                                                                                                                                                                                                                                                                                                                                                                                                                                                                                                                                                                                                                          | 2.994399 | 2.953050 | 1.776308 | 1.782120 |   |   |      |          |  |  |  |  |     |          |          |  |  |  |      |          |          |          |  |  |     |          |          |          |          |  |     |          |          |          |          |          |      |          |          |          |          |          |      |          |          |          |          |          |      |          |          |          |          |          |     |          |          |          |          |          |       |          |          |          |          |          |  |   |   |   |   |    |      |          |  |  |  |  |      |          |          |  |  |  |      |          |          |          |  |  |     |          |          |          |          |  |       |          |          |          |          |          |
| 7 B                                                                                                                            | 2.140139                                                                                                                                                                                                                                                                                                                                                                                                                                                                                                                                                                                                                                                                                                                                                                                                                                                                                                                                                                                                                                                                                                                                                                                                                                                                                                                                                                                                                                                                                                                                                                                                                                                                                                                          | 1.773933 | 1.722244 | 3.485464 | 3.106549 |   |   |      |          |  |  |  |  |     |          |          |  |  |  |      |          |          |          |  |  |     |          |          |          |          |  |     |          |          |          |          |          |      |          |          |          |          |          |      |          |          |          |          |          |      |          |          |          |          |          |     |          |          |          |          |          |       |          |          |          |          |          |  |   |   |   |   |    |      |          |  |  |  |  |      |          |          |  |  |  |      |          |          |          |  |  |     |          |          |          |          |  |       |          |          |          |          |          |
| 8 Ru                                                                                                                           | 3.313069                                                                                                                                                                                                                                                                                                                                                                                                                                                                                                                                                                                                                                                                                                                                                                                                                                                                                                                                                                                                                                                                                                                                                                                                                                                                                                                                                                                                                                                                                                                                                                                                                                                                                                                          | 2.140139 | 2.251177 | 3.109620 | 2.313449 |   |   |      |          |  |  |  |  |     |          |          |  |  |  |      |          |          |          |  |  |     |          |          |          |          |  |     |          |          |          |          |          |      |          |          |          |          |          |      |          |          |          |          |          |      |          |          |          |          |          |     |          |          |          |          |          |       |          |          |          |          |          |  |   |   |   |   |    |      |          |  |  |  |  |      |          |          |  |  |  |      |          |          |          |  |  |     |          |          |          |          |  |       |          |          |          |          |          |
| 9 B                                                                                                                            | 2.065182                                                                                                                                                                                                                                                                                                                                                                                                                                                                                                                                                                                                                                                                                                                                                                                                                                                                                                                                                                                                                                                                                                                                                                                                                                                                                                                                                                                                                                                                                                                                                                                                                                                                                                                          | 3.548758 | 1.757370 | 1.782120 | 1.776308 |   |   |      |          |  |  |  |  |     |          |          |  |  |  |      |          |          |          |  |  |     |          |          |          |          |  |     |          |          |          |          |          |      |          |          |          |          |          |      |          |          |          |          |          |      |          |          |          |          |          |     |          |          |          |          |          |       |          |          |          |          |          |  |   |   |   |   |    |      |          |  |  |  |  |      |          |          |  |  |  |      |          |          |          |  |  |     |          |          |          |          |  |       |          |          |          |          |          |
| 10 B                                                                                                                           | 2.251177                                                                                                                                                                                                                                                                                                                                                                                                                                                                                                                                                                                                                                                                                                                                                                                                                                                                                                                                                                                                                                                                                                                                                                                                                                                                                                                                                                                                                                                                                                                                                                                                                                                                                                                          | 1.722244 | 3.036658 | 1.728738 | 2.757428 |   |   |      |          |  |  |  |  |     |          |          |  |  |  |      |          |          |          |  |  |     |          |          |          |          |  |     |          |          |          |          |          |      |          |          |          |          |          |      |          |          |          |          |          |      |          |          |          |          |          |     |          |          |          |          |          |       |          |          |          |          |          |  |   |   |   |   |    |      |          |  |  |  |  |      |          |          |  |  |  |      |          |          |          |  |  |     |          |          |          |          |  |       |          |          |          |          |          |
|                                                                                                                                | 6                                                                                                                                                                                                                                                                                                                                                                                                                                                                                                                                                                                                                                                                                                                                                                                                                                                                                                                                                                                                                                                                                                                                                                                                                                                                                                                                                                                                                                                                                                                                                                                                                                                                                                                                 | 7        | 8        | 9        | 10       |   |   |      |          |  |  |  |  |     |          |          |  |  |  |      |          |          |          |  |  |     |          |          |          |          |  |     |          |          |          |          |          |      |          |          |          |          |          |      |          |          |          |          |          |      |          |          |          |          |          |     |          |          |          |          |          |       |          |          |          |          |          |  |   |   |   |   |    |      |          |  |  |  |  |      |          |          |  |  |  |      |          |          |          |  |  |     |          |          |          |          |  |       |          |          |          |          |          |
| 6 B                                                                                                                            | 0.000000                                                                                                                                                                                                                                                                                                                                                                                                                                                                                                                                                                                                                                                                                                                                                                                                                                                                                                                                                                                                                                                                                                                                                                                                                                                                                                                                                                                                                                                                                                                                                                                                                                                                                                                          |          |          |          |          |   |   |      |          |  |  |  |  |     |          |          |  |  |  |      |          |          |          |  |  |     |          |          |          |          |  |     |          |          |          |          |          |      |          |          |          |          |          |      |          |          |          |          |          |      |          |          |          |          |          |     |          |          |          |          |          |       |          |          |          |          |          |  |   |   |   |   |    |      |          |  |  |  |  |      |          |          |  |  |  |      |          |          |          |  |  |     |          |          |          |          |  |       |          |          |          |          |          |
| 7 B                                                                                                                            | 3.548758                                                                                                                                                                                                                                                                                                                                                                                                                                                                                                                                                                                                                                                                                                                                                                                                                                                                                                                                                                                                                                                                                                                                                                                                                                                                                                                                                                                                                                                                                                                                                                                                                                                                                                                          | 0.000000 |          |          |          |   |   |      |          |  |  |  |  |     |          |          |  |  |  |      |          |          |          |  |  |     |          |          |          |          |  |     |          |          |          |          |          |      |          |          |          |          |          |      |          |          |          |          |          |      |          |          |          |          |          |     |          |          |          |          |          |       |          |          |          |          |          |  |   |   |   |   |    |      |          |  |  |  |  |      |          |          |  |  |  |      |          |          |          |  |  |     |          |          |          |          |  |       |          |          |          |          |          |
| 8 Ru                                                                                                                           | 2.065182                                                                                                                                                                                                                                                                                                                                                                                                                                                                                                                                                                                                                                                                                                                                                                                                                                                                                                                                                                                                                                                                                                                                                                                                                                                                                                                                                                                                                                                                                                                                                                                                                                                                                                                          | 2.187945 | 0.000000 |          |          |   |   |      |          |  |  |  |  |     |          |          |  |  |  |      |          |          |          |  |  |     |          |          |          |          |  |     |          |          |          |          |          |      |          |          |          |          |          |      |          |          |          |          |          |      |          |          |          |          |          |     |          |          |          |          |          |       |          |          |          |          |          |  |   |   |   |   |    |      |          |  |  |  |  |      |          |          |  |  |  |      |          |          |          |  |  |     |          |          |          |          |  |       |          |          |          |          |          |
| 9 B                                                                                                                            | 2.939430                                                                                                                                                                                                                                                                                                                                                                                                                                                                                                                                                                                                                                                                                                                                                                                                                                                                                                                                                                                                                                                                                                                                                                                                                                                                                                                                                                                                                                                                                                                                                                                                                                                                                                                          | 2.994399 | 3.390472 | 0.000000 |          |   |   |      |          |  |  |  |  |     |          |          |  |  |  |      |          |          |          |  |  |     |          |          |          |          |  |     |          |          |          |          |          |      |          |          |          |          |          |      |          |          |          |          |          |      |          |          |          |          |          |     |          |          |          |          |          |       |          |          |          |          |          |  |   |   |   |   |    |      |          |  |  |  |  |      |          |          |  |  |  |      |          |          |          |  |  |     |          |          |          |          |  |       |          |          |          |          |          |
| 10 B                                                                                                                           | 1.757370                                                                                                                                                                                                                                                                                                                                                                                                                                                                                                                                                                                                                                                                                                                                                                                                                                                                                                                                                                                                                                                                                                                                                                                                                                                                                                                                                                                                                                                                                                                                                                                                                                                                                                                          | 2.886663 | 2.362914 | 2.953050 | 0.000000 |   |   |      |          |  |  |  |  |     |          |          |  |  |  |      |          |          |          |  |  |     |          |          |          |          |  |     |          |          |          |          |          |      |          |          |          |          |          |      |          |          |          |          |          |      |          |          |          |          |          |     |          |          |          |          |          |       |          |          |          |          |          |  |   |   |   |   |    |      |          |  |  |  |  |      |          |          |  |  |  |      |          |          |          |  |  |     |          |          |          |          |  |       |          |          |          |          |          |
|  <p>5. -780.68027389 +21.0 C<sub>2</sub></p> | <table border="1"> <thead> <tr> <th></th> <th>1</th> <th>2</th> <th>3</th> <th>4</th> <th>5</th> </tr> </thead> <tbody> <tr><td>1 B</td><td>0.000000</td><td></td><td></td><td></td><td></td></tr> <tr><td>2 B</td><td>1.865545</td><td>0.000000</td><td></td><td></td><td></td></tr> <tr><td>3 Ru</td><td>2.942021</td><td>2.272284</td><td>0.000000</td><td></td><td></td></tr> <tr><td>4 B</td><td>1.829794</td><td>2.812091</td><td>2.235862</td><td>0.000000</td><td></td></tr> <tr><td>5 B</td><td>2.965025</td><td>1.743107</td><td>2.297242</td><td>3.496906</td><td>0.000000</td></tr> <tr><td>6 B</td><td>3.496906</td><td>3.026419</td><td>2.036867</td><td>3.146990</td><td>1.829794</td></tr> <tr><td>7 Ru</td><td>2.297242</td><td>3.160987</td><td>2.885994</td><td>2.036867</td><td>2.942021</td></tr> <tr><td>8 B</td><td>1.743107</td><td>1.763293</td><td>3.160987</td><td>3.026419</td><td>1.865545</td></tr> <tr><td>9 B</td><td>3.128648</td><td>2.928739</td><td>3.244329</td><td>3.617776</td><td>1.763669</td></tr> <tr><td>10 B</td><td>1.763647</td><td>1.758367</td><td>2.075221</td><td>1.772481</td><td>3.128550</td></tr> <tr> <td></td> <td>6</td> <td>7</td> <td>8</td> <td>9</td> <td>10</td> </tr> <tr><td>6 B</td><td>0.000000</td><td></td><td></td><td></td><td></td></tr> <tr><td>7 Ru</td><td>2.235862</td><td>0.000000</td><td></td><td></td><td></td></tr> <tr><td>8 B</td><td>2.812091</td><td>2.272284</td><td>0.000000</td><td></td><td></td></tr> <tr><td>9 B</td><td>1.772490</td><td>2.075302</td><td>1.758447</td><td>0.000000</td><td></td></tr> <tr><td>10 B</td><td>3.617685</td><td>3.244275</td><td>2.928670</td><td>4.006021</td><td>0.000000</td></tr> </tbody> </table>  |          | 1        | 2        | 3        | 4 | 5 | 1 B  | 0.000000 |  |  |  |  | 2 B | 1.865545 | 0.000000 |  |  |  | 3 Ru | 2.942021 | 2.272284 | 0.000000 |  |  | 4 B | 1.829794 | 2.812091 | 2.235862 | 0.000000 |  | 5 B | 2.965025 | 1.743107 | 2.297242 | 3.496906 | 0.000000 | 6 B  | 3.496906 | 3.026419 | 2.036867 | 3.146990 | 1.829794 | 7 Ru | 2.297242 | 3.160987 | 2.885994 | 2.036867 | 2.942021 | 8 B  | 1.743107 | 1.763293 | 3.160987 | 3.026419 | 1.865545 | 9 B | 3.128648 | 2.928739 | 3.244329 | 3.617776 | 1.763669 | 10 B  | 1.763647 | 1.758367 | 2.075221 | 1.772481 | 3.128550 |  | 6 | 7 | 8 | 9 | 10 | 6 B  | 0.000000 |  |  |  |  | 7 Ru | 2.235862 | 0.000000 |  |  |  | 8 B  | 2.812091 | 2.272284 | 0.000000 |  |  | 9 B | 1.772490 | 2.075302 | 1.758447 | 0.000000 |  | 10 B  | 3.617685 | 3.244275 | 2.928670 | 4.006021 | 0.000000 |
|                                                                                                                                | 1                                                                                                                                                                                                                                                                                                                                                                                                                                                                                                                                                                                                                                                                                                                                                                                                                                                                                                                                                                                                                                                                                                                                                                                                                                                                                                                                                                                                                                                                                                                                                                                                                                                                                                                                 | 2        | 3        | 4        | 5        |   |   |      |          |  |  |  |  |     |          |          |  |  |  |      |          |          |          |  |  |     |          |          |          |          |  |     |          |          |          |          |          |      |          |          |          |          |          |      |          |          |          |          |          |      |          |          |          |          |          |     |          |          |          |          |          |       |          |          |          |          |          |  |   |   |   |   |    |      |          |  |  |  |  |      |          |          |  |  |  |      |          |          |          |  |  |     |          |          |          |          |  |       |          |          |          |          |          |
| 1 B                                                                                                                            | 0.000000                                                                                                                                                                                                                                                                                                                                                                                                                                                                                                                                                                                                                                                                                                                                                                                                                                                                                                                                                                                                                                                                                                                                                                                                                                                                                                                                                                                                                                                                                                                                                                                                                                                                                                                          |          |          |          |          |   |   |      |          |  |  |  |  |     |          |          |  |  |  |      |          |          |          |  |  |     |          |          |          |          |  |     |          |          |          |          |          |      |          |          |          |          |          |      |          |          |          |          |          |      |          |          |          |          |          |     |          |          |          |          |          |       |          |          |          |          |          |  |   |   |   |   |    |      |          |  |  |  |  |      |          |          |  |  |  |      |          |          |          |  |  |     |          |          |          |          |  |       |          |          |          |          |          |
| 2 B                                                                                                                            | 1.865545                                                                                                                                                                                                                                                                                                                                                                                                                                                                                                                                                                                                                                                                                                                                                                                                                                                                                                                                                                                                                                                                                                                                                                                                                                                                                                                                                                                                                                                                                                                                                                                                                                                                                                                          | 0.000000 |          |          |          |   |   |      |          |  |  |  |  |     |          |          |  |  |  |      |          |          |          |  |  |     |          |          |          |          |  |     |          |          |          |          |          |      |          |          |          |          |          |      |          |          |          |          |          |      |          |          |          |          |          |     |          |          |          |          |          |       |          |          |          |          |          |  |   |   |   |   |    |      |          |  |  |  |  |      |          |          |  |  |  |      |          |          |          |  |  |     |          |          |          |          |  |       |          |          |          |          |          |
| 3 Ru                                                                                                                           | 2.942021                                                                                                                                                                                                                                                                                                                                                                                                                                                                                                                                                                                                                                                                                                                                                                                                                                                                                                                                                                                                                                                                                                                                                                                                                                                                                                                                                                                                                                                                                                                                                                                                                                                                                                                          | 2.272284 | 0.000000 |          |          |   |   |      |          |  |  |  |  |     |          |          |  |  |  |      |          |          |          |  |  |     |          |          |          |          |  |     |          |          |          |          |          |      |          |          |          |          |          |      |          |          |          |          |          |      |          |          |          |          |          |     |          |          |          |          |          |       |          |          |          |          |          |  |   |   |   |   |    |      |          |  |  |  |  |      |          |          |  |  |  |      |          |          |          |  |  |     |          |          |          |          |  |       |          |          |          |          |          |
| 4 B                                                                                                                            | 1.829794                                                                                                                                                                                                                                                                                                                                                                                                                                                                                                                                                                                                                                                                                                                                                                                                                                                                                                                                                                                                                                                                                                                                                                                                                                                                                                                                                                                                                                                                                                                                                                                                                                                                                                                          | 2.812091 | 2.235862 | 0.000000 |          |   |   |      |          |  |  |  |  |     |          |          |  |  |  |      |          |          |          |  |  |     |          |          |          |          |  |     |          |          |          |          |          |      |          |          |          |          |          |      |          |          |          |          |          |      |          |          |          |          |          |     |          |          |          |          |          |       |          |          |          |          |          |  |   |   |   |   |    |      |          |  |  |  |  |      |          |          |  |  |  |      |          |          |          |  |  |     |          |          |          |          |  |       |          |          |          |          |          |
| 5 B                                                                                                                            | 2.965025                                                                                                                                                                                                                                                                                                                                                                                                                                                                                                                                                                                                                                                                                                                                                                                                                                                                                                                                                                                                                                                                                                                                                                                                                                                                                                                                                                                                                                                                                                                                                                                                                                                                                                                          | 1.743107 | 2.297242 | 3.496906 | 0.000000 |   |   |      |          |  |  |  |  |     |          |          |  |  |  |      |          |          |          |  |  |     |          |          |          |          |  |     |          |          |          |          |          |      |          |          |          |          |          |      |          |          |          |          |          |      |          |          |          |          |          |     |          |          |          |          |          |       |          |          |          |          |          |  |   |   |   |   |    |      |          |  |  |  |  |      |          |          |  |  |  |      |          |          |          |  |  |     |          |          |          |          |  |       |          |          |          |          |          |
| 6 B                                                                                                                            | 3.496906                                                                                                                                                                                                                                                                                                                                                                                                                                                                                                                                                                                                                                                                                                                                                                                                                                                                                                                                                                                                                                                                                                                                                                                                                                                                                                                                                                                                                                                                                                                                                                                                                                                                                                                          | 3.026419 | 2.036867 | 3.146990 | 1.829794 |   |   |      |          |  |  |  |  |     |          |          |  |  |  |      |          |          |          |  |  |     |          |          |          |          |  |     |          |          |          |          |          |      |          |          |          |          |          |      |          |          |          |          |          |      |          |          |          |          |          |     |          |          |          |          |          |       |          |          |          |          |          |  |   |   |   |   |    |      |          |  |  |  |  |      |          |          |  |  |  |      |          |          |          |  |  |     |          |          |          |          |  |       |          |          |          |          |          |
| 7 Ru                                                                                                                           | 2.297242                                                                                                                                                                                                                                                                                                                                                                                                                                                                                                                                                                                                                                                                                                                                                                                                                                                                                                                                                                                                                                                                                                                                                                                                                                                                                                                                                                                                                                                                                                                                                                                                                                                                                                                          | 3.160987 | 2.885994 | 2.036867 | 2.942021 |   |   |      |          |  |  |  |  |     |          |          |  |  |  |      |          |          |          |  |  |     |          |          |          |          |  |     |          |          |          |          |          |      |          |          |          |          |          |      |          |          |          |          |          |      |          |          |          |          |          |     |          |          |          |          |          |       |          |          |          |          |          |  |   |   |   |   |    |      |          |  |  |  |  |      |          |          |  |  |  |      |          |          |          |  |  |     |          |          |          |          |  |       |          |          |          |          |          |
| 8 B                                                                                                                            | 1.743107                                                                                                                                                                                                                                                                                                                                                                                                                                                                                                                                                                                                                                                                                                                                                                                                                                                                                                                                                                                                                                                                                                                                                                                                                                                                                                                                                                                                                                                                                                                                                                                                                                                                                                                          | 1.763293 | 3.160987 | 3.026419 | 1.865545 |   |   |      |          |  |  |  |  |     |          |          |  |  |  |      |          |          |          |  |  |     |          |          |          |          |  |     |          |          |          |          |          |      |          |          |          |          |          |      |          |          |          |          |          |      |          |          |          |          |          |     |          |          |          |          |          |       |          |          |          |          |          |  |   |   |   |   |    |      |          |  |  |  |  |      |          |          |  |  |  |      |          |          |          |  |  |     |          |          |          |          |  |       |          |          |          |          |          |
| 9 B                                                                                                                            | 3.128648                                                                                                                                                                                                                                                                                                                                                                                                                                                                                                                                                                                                                                                                                                                                                                                                                                                                                                                                                                                                                                                                                                                                                                                                                                                                                                                                                                                                                                                                                                                                                                                                                                                                                                                          | 2.928739 | 3.244329 | 3.617776 | 1.763669 |   |   |      |          |  |  |  |  |     |          |          |  |  |  |      |          |          |          |  |  |     |          |          |          |          |  |     |          |          |          |          |          |      |          |          |          |          |          |      |          |          |          |          |          |      |          |          |          |          |          |     |          |          |          |          |          |       |          |          |          |          |          |  |   |   |   |   |    |      |          |  |  |  |  |      |          |          |  |  |  |      |          |          |          |  |  |     |          |          |          |          |  |       |          |          |          |          |          |
| 10 B                                                                                                                           | 1.763647                                                                                                                                                                                                                                                                                                                                                                                                                                                                                                                                                                                                                                                                                                                                                                                                                                                                                                                                                                                                                                                                                                                                                                                                                                                                                                                                                                                                                                                                                                                                                                                                                                                                                                                          | 1.758367 | 2.075221 | 1.772481 | 3.128550 |   |   |      |          |  |  |  |  |     |          |          |  |  |  |      |          |          |          |  |  |     |          |          |          |          |  |     |          |          |          |          |          |      |          |          |          |          |          |      |          |          |          |          |          |      |          |          |          |          |          |     |          |          |          |          |          |       |          |          |          |          |          |  |   |   |   |   |    |      |          |  |  |  |  |      |          |          |  |  |  |      |          |          |          |  |  |     |          |          |          |          |  |       |          |          |          |          |          |
|                                                                                                                                | 6                                                                                                                                                                                                                                                                                                                                                                                                                                                                                                                                                                                                                                                                                                                                                                                                                                                                                                                                                                                                                                                                                                                                                                                                                                                                                                                                                                                                                                                                                                                                                                                                                                                                                                                                 | 7        | 8        | 9        | 10       |   |   |      |          |  |  |  |  |     |          |          |  |  |  |      |          |          |          |  |  |     |          |          |          |          |  |     |          |          |          |          |          |      |          |          |          |          |          |      |          |          |          |          |          |      |          |          |          |          |          |     |          |          |          |          |          |       |          |          |          |          |          |  |   |   |   |   |    |      |          |  |  |  |  |      |          |          |  |  |  |      |          |          |          |  |  |     |          |          |          |          |  |       |          |          |          |          |          |
| 6 B                                                                                                                            | 0.000000                                                                                                                                                                                                                                                                                                                                                                                                                                                                                                                                                                                                                                                                                                                                                                                                                                                                                                                                                                                                                                                                                                                                                                                                                                                                                                                                                                                                                                                                                                                                                                                                                                                                                                                          |          |          |          |          |   |   |      |          |  |  |  |  |     |          |          |  |  |  |      |          |          |          |  |  |     |          |          |          |          |  |     |          |          |          |          |          |      |          |          |          |          |          |      |          |          |          |          |          |      |          |          |          |          |          |     |          |          |          |          |          |       |          |          |          |          |          |  |   |   |   |   |    |      |          |  |  |  |  |      |          |          |  |  |  |      |          |          |          |  |  |     |          |          |          |          |  |       |          |          |          |          |          |
| 7 Ru                                                                                                                           | 2.235862                                                                                                                                                                                                                                                                                                                                                                                                                                                                                                                                                                                                                                                                                                                                                                                                                                                                                                                                                                                                                                                                                                                                                                                                                                                                                                                                                                                                                                                                                                                                                                                                                                                                                                                          | 0.000000 |          |          |          |   |   |      |          |  |  |  |  |     |          |          |  |  |  |      |          |          |          |  |  |     |          |          |          |          |  |     |          |          |          |          |          |      |          |          |          |          |          |      |          |          |          |          |          |      |          |          |          |          |          |     |          |          |          |          |          |       |          |          |          |          |          |  |   |   |   |   |    |      |          |  |  |  |  |      |          |          |  |  |  |      |          |          |          |  |  |     |          |          |          |          |  |       |          |          |          |          |          |
| 8 B                                                                                                                            | 2.812091                                                                                                                                                                                                                                                                                                                                                                                                                                                                                                                                                                                                                                                                                                                                                                                                                                                                                                                                                                                                                                                                                                                                                                                                                                                                                                                                                                                                                                                                                                                                                                                                                                                                                                                          | 2.272284 | 0.000000 |          |          |   |   |      |          |  |  |  |  |     |          |          |  |  |  |      |          |          |          |  |  |     |          |          |          |          |  |     |          |          |          |          |          |      |          |          |          |          |          |      |          |          |          |          |          |      |          |          |          |          |          |     |          |          |          |          |          |       |          |          |          |          |          |  |   |   |   |   |    |      |          |  |  |  |  |      |          |          |  |  |  |      |          |          |          |  |  |     |          |          |          |          |  |       |          |          |          |          |          |
| 9 B                                                                                                                            | 1.772490                                                                                                                                                                                                                                                                                                                                                                                                                                                                                                                                                                                                                                                                                                                                                                                                                                                                                                                                                                                                                                                                                                                                                                                                                                                                                                                                                                                                                                                                                                                                                                                                                                                                                                                          | 2.075302 | 1.758447 | 0.000000 |          |   |   |      |          |  |  |  |  |     |          |          |  |  |  |      |          |          |          |  |  |     |          |          |          |          |  |     |          |          |          |          |          |      |          |          |          |          |          |      |          |          |          |          |          |      |          |          |          |          |          |     |          |          |          |          |          |       |          |          |          |          |          |  |   |   |   |   |    |      |          |  |  |  |  |      |          |          |  |  |  |      |          |          |          |  |  |     |          |          |          |          |  |       |          |          |          |          |          |
| 10 B                                                                                                                           | 3.617685                                                                                                                                                                                                                                                                                                                                                                                                                                                                                                                                                                                                                                                                                                                                                                                                                                                                                                                                                                                                                                                                                                                                                                                                                                                                                                                                                                                                                                                                                                                                                                                                                                                                                                                          | 3.244275 | 2.928670 | 4.006021 | 0.000000 |   |   |      |          |  |  |  |  |     |          |          |  |  |  |      |          |          |          |  |  |     |          |          |          |          |  |     |          |          |          |          |          |      |          |          |          |          |          |      |          |          |          |          |          |      |          |          |          |          |          |     |          |          |          |          |          |       |          |          |          |          |          |  |   |   |   |   |    |      |          |  |  |  |  |      |          |          |  |  |  |      |          |          |          |  |  |     |          |          |          |          |  |       |          |          |          |          |          |
|  <p>6. -780.67970267 +21.4</p>              | <table border="1"> <thead> <tr> <th></th> <th>1</th> <th>2</th> <th>3</th> <th>4</th> <th>5</th> </tr> </thead> <tbody> <tr><td>1 B</td><td>0.000000</td><td></td><td></td><td></td><td></td></tr> <tr><td>2 B</td><td>3.275661</td><td>0.000000</td><td></td><td></td><td></td></tr> <tr><td>3 B</td><td>3.149761</td><td>3.157349</td><td>0.000000</td><td></td><td></td></tr> <tr><td>4 B</td><td>1.726180</td><td>3.326822</td><td>1.687881</td><td>0.000000</td><td></td></tr> <tr><td>5 B</td><td>1.968493</td><td>1.657977</td><td>3.322297</td><td>2.615725</td><td>0.000000</td></tr> <tr><td>6 Ru</td><td>3.150637</td><td>2.244419</td><td>2.166647</td><td>2.281516</td><td>2.280425</td></tr> <tr><td>7 B</td><td>1.863841</td><td>3.690232</td><td>3.162204</td><td>1.724304</td><td>2.427356</td></tr> <tr><td>8 B</td><td>1.714018</td><td>3.378281</td><td>4.205990</td><td>2.849620</td><td>1.729005</td></tr> <tr><td>9 B</td><td>2.739898</td><td>2.936007</td><td>3.894145</td><td>2.974569</td><td>1.792588</td></tr> <tr><td>10 Ru</td><td>2.336650</td><td>2.090072</td><td>2.044550</td><td>2.180012</td><td>2.255067</td></tr> <tr> <td></td> <td>6</td> <td>7</td> <td>8</td> <td>9</td> <td>10</td> </tr> <tr><td>6 Ru</td><td>0.000000</td><td></td><td></td><td></td><td></td></tr> <tr><td>7 B</td><td>2.438862</td><td>0.000000</td><td></td><td></td><td></td></tr> <tr><td>8 B</td><td>3.217996</td><td>1.773405</td><td>0.000000</td><td></td><td></td></tr> <tr><td>9 B</td><td>2.177728</td><td>1.798719</td><td>1.634035</td><td>0.000000</td><td></td></tr> <tr><td>10 Ru</td><td>2.738024</td><td>3.376905</td><td>3.484371</td><td>3.690577</td><td>0.000000</td></tr> </tbody> </table> |          | 1        | 2        | 3        | 4 | 5 | 1 B  | 0.000000 |  |  |  |  | 2 B | 3.275661 | 0.000000 |  |  |  | 3 B  | 3.149761 | 3.157349 | 0.000000 |  |  | 4 B | 1.726180 | 3.326822 | 1.687881 | 0.000000 |  | 5 B | 1.968493 | 1.657977 | 3.322297 | 2.615725 | 0.000000 | 6 Ru | 3.150637 | 2.244419 | 2.166647 | 2.281516 | 2.280425 | 7 B  | 1.863841 | 3.690232 | 3.162204 | 1.724304 | 2.427356 | 8 B  | 1.714018 | 3.378281 | 4.205990 | 2.849620 | 1.729005 | 9 B | 2.739898 | 2.936007 | 3.894145 | 2.974569 | 1.792588 | 10 Ru | 2.336650 | 2.090072 | 2.044550 | 2.180012 | 2.255067 |  | 6 | 7 | 8 | 9 | 10 | 6 Ru | 0.000000 |  |  |  |  | 7 B  | 2.438862 | 0.000000 |  |  |  | 8 B  | 3.217996 | 1.773405 | 0.000000 |  |  | 9 B | 2.177728 | 1.798719 | 1.634035 | 0.000000 |  | 10 Ru | 2.738024 | 3.376905 | 3.484371 | 3.690577 | 0.000000 |
|                                                                                                                                | 1                                                                                                                                                                                                                                                                                                                                                                                                                                                                                                                                                                                                                                                                                                                                                                                                                                                                                                                                                                                                                                                                                                                                                                                                                                                                                                                                                                                                                                                                                                                                                                                                                                                                                                                                 | 2        | 3        | 4        | 5        |   |   |      |          |  |  |  |  |     |          |          |  |  |  |      |          |          |          |  |  |     |          |          |          |          |  |     |          |          |          |          |          |      |          |          |          |          |          |      |          |          |          |          |          |      |          |          |          |          |          |     |          |          |          |          |          |       |          |          |          |          |          |  |   |   |   |   |    |      |          |  |  |  |  |      |          |          |  |  |  |      |          |          |          |  |  |     |          |          |          |          |  |       |          |          |          |          |          |
| 1 B                                                                                                                            | 0.000000                                                                                                                                                                                                                                                                                                                                                                                                                                                                                                                                                                                                                                                                                                                                                                                                                                                                                                                                                                                                                                                                                                                                                                                                                                                                                                                                                                                                                                                                                                                                                                                                                                                                                                                          |          |          |          |          |   |   |      |          |  |  |  |  |     |          |          |  |  |  |      |          |          |          |  |  |     |          |          |          |          |  |     |          |          |          |          |          |      |          |          |          |          |          |      |          |          |          |          |          |      |          |          |          |          |          |     |          |          |          |          |          |       |          |          |          |          |          |  |   |   |   |   |    |      |          |  |  |  |  |      |          |          |  |  |  |      |          |          |          |  |  |     |          |          |          |          |  |       |          |          |          |          |          |
| 2 B                                                                                                                            | 3.275661                                                                                                                                                                                                                                                                                                                                                                                                                                                                                                                                                                                                                                                                                                                                                                                                                                                                                                                                                                                                                                                                                                                                                                                                                                                                                                                                                                                                                                                                                                                                                                                                                                                                                                                          | 0.000000 |          |          |          |   |   |      |          |  |  |  |  |     |          |          |  |  |  |      |          |          |          |  |  |     |          |          |          |          |  |     |          |          |          |          |          |      |          |          |          |          |          |      |          |          |          |          |          |      |          |          |          |          |          |     |          |          |          |          |          |       |          |          |          |          |          |  |   |   |   |   |    |      |          |  |  |  |  |      |          |          |  |  |  |      |          |          |          |  |  |     |          |          |          |          |  |       |          |          |          |          |          |
| 3 B                                                                                                                            | 3.149761                                                                                                                                                                                                                                                                                                                                                                                                                                                                                                                                                                                                                                                                                                                                                                                                                                                                                                                                                                                                                                                                                                                                                                                                                                                                                                                                                                                                                                                                                                                                                                                                                                                                                                                          | 3.157349 | 0.000000 |          |          |   |   |      |          |  |  |  |  |     |          |          |  |  |  |      |          |          |          |  |  |     |          |          |          |          |  |     |          |          |          |          |          |      |          |          |          |          |          |      |          |          |          |          |          |      |          |          |          |          |          |     |          |          |          |          |          |       |          |          |          |          |          |  |   |   |   |   |    |      |          |  |  |  |  |      |          |          |  |  |  |      |          |          |          |  |  |     |          |          |          |          |  |       |          |          |          |          |          |
| 4 B                                                                                                                            | 1.726180                                                                                                                                                                                                                                                                                                                                                                                                                                                                                                                                                                                                                                                                                                                                                                                                                                                                                                                                                                                                                                                                                                                                                                                                                                                                                                                                                                                                                                                                                                                                                                                                                                                                                                                          | 3.326822 | 1.687881 | 0.000000 |          |   |   |      |          |  |  |  |  |     |          |          |  |  |  |      |          |          |          |  |  |     |          |          |          |          |  |     |          |          |          |          |          |      |          |          |          |          |          |      |          |          |          |          |          |      |          |          |          |          |          |     |          |          |          |          |          |       |          |          |          |          |          |  |   |   |   |   |    |      |          |  |  |  |  |      |          |          |  |  |  |      |          |          |          |  |  |     |          |          |          |          |  |       |          |          |          |          |          |
| 5 B                                                                                                                            | 1.968493                                                                                                                                                                                                                                                                                                                                                                                                                                                                                                                                                                                                                                                                                                                                                                                                                                                                                                                                                                                                                                                                                                                                                                                                                                                                                                                                                                                                                                                                                                                                                                                                                                                                                                                          | 1.657977 | 3.322297 | 2.615725 | 0.000000 |   |   |      |          |  |  |  |  |     |          |          |  |  |  |      |          |          |          |  |  |     |          |          |          |          |  |     |          |          |          |          |          |      |          |          |          |          |          |      |          |          |          |          |          |      |          |          |          |          |          |     |          |          |          |          |          |       |          |          |          |          |          |  |   |   |   |   |    |      |          |  |  |  |  |      |          |          |  |  |  |      |          |          |          |  |  |     |          |          |          |          |  |       |          |          |          |          |          |
| 6 Ru                                                                                                                           | 3.150637                                                                                                                                                                                                                                                                                                                                                                                                                                                                                                                                                                                                                                                                                                                                                                                                                                                                                                                                                                                                                                                                                                                                                                                                                                                                                                                                                                                                                                                                                                                                                                                                                                                                                                                          | 2.244419 | 2.166647 | 2.281516 | 2.280425 |   |   |      |          |  |  |  |  |     |          |          |  |  |  |      |          |          |          |  |  |     |          |          |          |          |  |     |          |          |          |          |          |      |          |          |          |          |          |      |          |          |          |          |          |      |          |          |          |          |          |     |          |          |          |          |          |       |          |          |          |          |          |  |   |   |   |   |    |      |          |  |  |  |  |      |          |          |  |  |  |      |          |          |          |  |  |     |          |          |          |          |  |       |          |          |          |          |          |
| 7 B                                                                                                                            | 1.863841                                                                                                                                                                                                                                                                                                                                                                                                                                                                                                                                                                                                                                                                                                                                                                                                                                                                                                                                                                                                                                                                                                                                                                                                                                                                                                                                                                                                                                                                                                                                                                                                                                                                                                                          | 3.690232 | 3.162204 | 1.724304 | 2.427356 |   |   |      |          |  |  |  |  |     |          |          |  |  |  |      |          |          |          |  |  |     |          |          |          |          |  |     |          |          |          |          |          |      |          |          |          |          |          |      |          |          |          |          |          |      |          |          |          |          |          |     |          |          |          |          |          |       |          |          |          |          |          |  |   |   |   |   |    |      |          |  |  |  |  |      |          |          |  |  |  |      |          |          |          |  |  |     |          |          |          |          |  |       |          |          |          |          |          |
| 8 B                                                                                                                            | 1.714018                                                                                                                                                                                                                                                                                                                                                                                                                                                                                                                                                                                                                                                                                                                                                                                                                                                                                                                                                                                                                                                                                                                                                                                                                                                                                                                                                                                                                                                                                                                                                                                                                                                                                                                          | 3.378281 | 4.205990 | 2.849620 | 1.729005 |   |   |      |          |  |  |  |  |     |          |          |  |  |  |      |          |          |          |  |  |     |          |          |          |          |  |     |          |          |          |          |          |      |          |          |          |          |          |      |          |          |          |          |          |      |          |          |          |          |          |     |          |          |          |          |          |       |          |          |          |          |          |  |   |   |   |   |    |      |          |  |  |  |  |      |          |          |  |  |  |      |          |          |          |  |  |     |          |          |          |          |  |       |          |          |          |          |          |
| 9 B                                                                                                                            | 2.739898                                                                                                                                                                                                                                                                                                                                                                                                                                                                                                                                                                                                                                                                                                                                                                                                                                                                                                                                                                                                                                                                                                                                                                                                                                                                                                                                                                                                                                                                                                                                                                                                                                                                                                                          | 2.936007 | 3.894145 | 2.974569 | 1.792588 |   |   |      |          |  |  |  |  |     |          |          |  |  |  |      |          |          |          |  |  |     |          |          |          |          |  |     |          |          |          |          |          |      |          |          |          |          |          |      |          |          |          |          |          |      |          |          |          |          |          |     |          |          |          |          |          |       |          |          |          |          |          |  |   |   |   |   |    |      |          |  |  |  |  |      |          |          |  |  |  |      |          |          |          |  |  |     |          |          |          |          |  |       |          |          |          |          |          |
| 10 Ru                                                                                                                          | 2.336650                                                                                                                                                                                                                                                                                                                                                                                                                                                                                                                                                                                                                                                                                                                                                                                                                                                                                                                                                                                                                                                                                                                                                                                                                                                                                                                                                                                                                                                                                                                                                                                                                                                                                                                          | 2.090072 | 2.044550 | 2.180012 | 2.255067 |   |   |      |          |  |  |  |  |     |          |          |  |  |  |      |          |          |          |  |  |     |          |          |          |          |  |     |          |          |          |          |          |      |          |          |          |          |          |      |          |          |          |          |          |      |          |          |          |          |          |     |          |          |          |          |          |       |          |          |          |          |          |  |   |   |   |   |    |      |          |  |  |  |  |      |          |          |  |  |  |      |          |          |          |  |  |     |          |          |          |          |  |       |          |          |          |          |          |
|                                                                                                                                | 6                                                                                                                                                                                                                                                                                                                                                                                                                                                                                                                                                                                                                                                                                                                                                                                                                                                                                                                                                                                                                                                                                                                                                                                                                                                                                                                                                                                                                                                                                                                                                                                                                                                                                                                                 | 7        | 8        | 9        | 10       |   |   |      |          |  |  |  |  |     |          |          |  |  |  |      |          |          |          |  |  |     |          |          |          |          |  |     |          |          |          |          |          |      |          |          |          |          |          |      |          |          |          |          |          |      |          |          |          |          |          |     |          |          |          |          |          |       |          |          |          |          |          |  |   |   |   |   |    |      |          |  |  |  |  |      |          |          |  |  |  |      |          |          |          |  |  |     |          |          |          |          |  |       |          |          |          |          |          |
| 6 Ru                                                                                                                           | 0.000000                                                                                                                                                                                                                                                                                                                                                                                                                                                                                                                                                                                                                                                                                                                                                                                                                                                                                                                                                                                                                                                                                                                                                                                                                                                                                                                                                                                                                                                                                                                                                                                                                                                                                                                          |          |          |          |          |   |   |      |          |  |  |  |  |     |          |          |  |  |  |      |          |          |          |  |  |     |          |          |          |          |  |     |          |          |          |          |          |      |          |          |          |          |          |      |          |          |          |          |          |      |          |          |          |          |          |     |          |          |          |          |          |       |          |          |          |          |          |  |   |   |   |   |    |      |          |  |  |  |  |      |          |          |  |  |  |      |          |          |          |  |  |     |          |          |          |          |  |       |          |          |          |          |          |
| 7 B                                                                                                                            | 2.438862                                                                                                                                                                                                                                                                                                                                                                                                                                                                                                                                                                                                                                                                                                                                                                                                                                                                                                                                                                                                                                                                                                                                                                                                                                                                                                                                                                                                                                                                                                                                                                                                                                                                                                                          | 0.000000 |          |          |          |   |   |      |          |  |  |  |  |     |          |          |  |  |  |      |          |          |          |  |  |     |          |          |          |          |  |     |          |          |          |          |          |      |          |          |          |          |          |      |          |          |          |          |          |      |          |          |          |          |          |     |          |          |          |          |          |       |          |          |          |          |          |  |   |   |   |   |    |      |          |  |  |  |  |      |          |          |  |  |  |      |          |          |          |  |  |     |          |          |          |          |  |       |          |          |          |          |          |
| 8 B                                                                                                                            | 3.217996                                                                                                                                                                                                                                                                                                                                                                                                                                                                                                                                                                                                                                                                                                                                                                                                                                                                                                                                                                                                                                                                                                                                                                                                                                                                                                                                                                                                                                                                                                                                                                                                                                                                                                                          | 1.773405 | 0.000000 |          |          |   |   |      |          |  |  |  |  |     |          |          |  |  |  |      |          |          |          |  |  |     |          |          |          |          |  |     |          |          |          |          |          |      |          |          |          |          |          |      |          |          |          |          |          |      |          |          |          |          |          |     |          |          |          |          |          |       |          |          |          |          |          |  |   |   |   |   |    |      |          |  |  |  |  |      |          |          |  |  |  |      |          |          |          |  |  |     |          |          |          |          |  |       |          |          |          |          |          |
| 9 B                                                                                                                            | 2.177728                                                                                                                                                                                                                                                                                                                                                                                                                                                                                                                                                                                                                                                                                                                                                                                                                                                                                                                                                                                                                                                                                                                                                                                                                                                                                                                                                                                                                                                                                                                                                                                                                                                                                                                          | 1.798719 | 1.634035 | 0.000000 |          |   |   |      |          |  |  |  |  |     |          |          |  |  |  |      |          |          |          |  |  |     |          |          |          |          |  |     |          |          |          |          |          |      |          |          |          |          |          |      |          |          |          |          |          |      |          |          |          |          |          |     |          |          |          |          |          |       |          |          |          |          |          |  |   |   |   |   |    |      |          |  |  |  |  |      |          |          |  |  |  |      |          |          |          |  |  |     |          |          |          |          |  |       |          |          |          |          |          |
| 10 Ru                                                                                                                          | 2.738024                                                                                                                                                                                                                                                                                                                                                                                                                                                                                                                                                                                                                                                                                                                                                                                                                                                                                                                                                                                                                                                                                                                                                                                                                                                                                                                                                                                                                                                                                                                                                                                                                                                                                                                          | 3.376905 | 3.484371 | 3.690577 | 0.000000 |   |   |      |          |  |  |  |  |     |          |          |  |  |  |      |          |          |          |  |  |     |          |          |          |          |  |     |          |          |          |          |          |      |          |          |          |          |          |      |          |          |          |          |          |      |          |          |          |          |          |     |          |          |          |          |          |       |          |          |          |          |          |  |   |   |   |   |    |      |          |  |  |  |  |      |          |          |  |  |  |      |          |          |          |  |  |     |          |          |          |          |  |       |          |          |          |          |          |

| 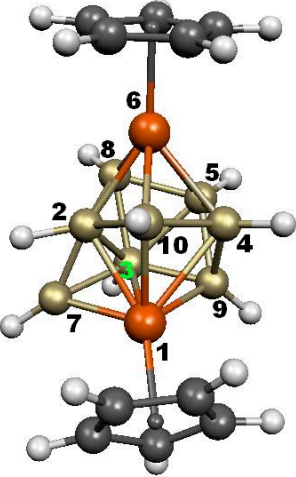 <p>7. -780.67258707 +25.8</p>                | <table border="1"> <thead> <tr> <th></th> <th>1</th> <th>2</th> <th>3</th> <th>4</th> <th>5</th> </tr> </thead> <tbody> <tr><td>1 Ru</td><td>0.000000</td><td></td><td></td><td></td><td></td></tr> <tr><td>2 B</td><td>2.219985</td><td>0.000000</td><td></td><td></td><td></td></tr> <tr><td>3 B</td><td>2.300579</td><td>1.877116</td><td>0.000000</td><td></td><td></td></tr> <tr><td>4 B</td><td>2.393312</td><td>2.661911</td><td>2.749438</td><td>0.000000</td><td></td></tr> <tr><td>5 B</td><td>3.173311</td><td>2.637850</td><td>1.980191</td><td>1.764941</td><td>0.000000</td></tr> <tr><td>6 Ru</td><td>3.612438</td><td>2.177772</td><td>3.165204</td><td>2.240601</td><td>2.244183</td></tr> <tr><td>7 B</td><td>2.071618</td><td>1.639819</td><td>1.895324</td><td>3.686698</td><td>3.595616</td></tr> <tr><td>8 B</td><td>3.486385</td><td>1.795863</td><td>1.825100</td><td>2.940432</td><td>1.810377</td></tr> <tr><td>9 B</td><td>2.076042</td><td>2.874573</td><td>1.796862</td><td>1.767853</td><td>1.743420</td></tr> <tr><td>10 B</td><td>2.121681</td><td>1.857163</td><td>3.099586</td><td>1.833745</td><td>2.972355</td></tr> <tr> <td></td> <td>6</td> <td>7</td> <td>8</td> <td>9</td> <td>10</td> </tr> <tr><td>6 Ru</td><td>0.000000</td><td></td><td></td><td></td><td></td></tr> <tr><td>7 B</td><td>3.792754</td><td>0.000000</td><td></td><td></td><td></td></tr> <tr><td>8 B</td><td>2.004228</td><td>2.858815</td><td>0.000000</td><td></td><td></td></tr> <tr><td>9 B</td><td>3.407495</td><td>3.154607</td><td>2.956277</td><td>0.000000</td><td></td></tr> <tr><td>10 B</td><td>2.052409</td><td>3.027042</td><td>3.071619</td><td>2.981778</td><td>0.000000</td></tr> </tbody> </table> |          | 1        | 2        | 3        | 4 | 5 | 1 Ru | 0.000000 |  |  |  |  | 2 B | 2.219985 | 0.000000 |  |  |  | 3 B | 2.300579 | 1.877116 | 0.000000 |  |  | 4 B | 2.393312 | 2.661911 | 2.749438 | 0.000000 |  | 5 B  | 3.173311 | 2.637850 | 1.980191 | 1.764941 | 0.000000 | 6 Ru | 3.612438 | 2.177772 | 3.165204 | 2.240601 | 2.244183 | 7 B | 2.071618 | 1.639819 | 1.895324 | 3.686698 | 3.595616 | 8 B  | 3.486385 | 1.795863 | 1.825100 | 2.940432 | 1.810377 | 9 B | 2.076042 | 2.874573 | 1.796862 | 1.767853 | 1.743420 | 10 B  | 2.121681 | 1.857163 | 3.099586 | 1.833745 | 2.972355 |  | 6 | 7 | 8 | 9 | 10 | 6 Ru | 0.000000 |  |  |  |  | 7 B | 3.792754 | 0.000000 |  |  |  | 8 B  | 2.004228 | 2.858815 | 0.000000 |  |  | 9 B | 3.407495 | 3.154607 | 2.956277 | 0.000000 |  | 10 B  | 2.052409 | 3.027042 | 3.071619 | 2.981778 | 0.000000 |
|--------------------------------------------------------------------------------------------------------------------------------|----------------------------------------------------------------------------------------------------------------------------------------------------------------------------------------------------------------------------------------------------------------------------------------------------------------------------------------------------------------------------------------------------------------------------------------------------------------------------------------------------------------------------------------------------------------------------------------------------------------------------------------------------------------------------------------------------------------------------------------------------------------------------------------------------------------------------------------------------------------------------------------------------------------------------------------------------------------------------------------------------------------------------------------------------------------------------------------------------------------------------------------------------------------------------------------------------------------------------------------------------------------------------------------------------------------------------------------------------------------------------------------------------------------------------------------------------------------------------------------------------------------------------------------------------------------------------------------------------------------------------------------------------------------------------------------------------------------------------------|----------|----------|----------|----------|---|---|------|----------|--|--|--|--|-----|----------|----------|--|--|--|-----|----------|----------|----------|--|--|-----|----------|----------|----------|----------|--|------|----------|----------|----------|----------|----------|------|----------|----------|----------|----------|----------|-----|----------|----------|----------|----------|----------|------|----------|----------|----------|----------|----------|-----|----------|----------|----------|----------|----------|-------|----------|----------|----------|----------|----------|--|---|---|---|---|----|------|----------|--|--|--|--|-----|----------|----------|--|--|--|------|----------|----------|----------|--|--|-----|----------|----------|----------|----------|--|-------|----------|----------|----------|----------|----------|
|                                                                                                                                | 1                                                                                                                                                                                                                                                                                                                                                                                                                                                                                                                                                                                                                                                                                                                                                                                                                                                                                                                                                                                                                                                                                                                                                                                                                                                                                                                                                                                                                                                                                                                                                                                                                                                                                                                                | 2        | 3        | 4        | 5        |   |   |      |          |  |  |  |  |     |          |          |  |  |  |     |          |          |          |  |  |     |          |          |          |          |  |      |          |          |          |          |          |      |          |          |          |          |          |     |          |          |          |          |          |      |          |          |          |          |          |     |          |          |          |          |          |       |          |          |          |          |          |  |   |   |   |   |    |      |          |  |  |  |  |     |          |          |  |  |  |      |          |          |          |  |  |     |          |          |          |          |  |       |          |          |          |          |          |
| 1 Ru                                                                                                                           | 0.000000                                                                                                                                                                                                                                                                                                                                                                                                                                                                                                                                                                                                                                                                                                                                                                                                                                                                                                                                                                                                                                                                                                                                                                                                                                                                                                                                                                                                                                                                                                                                                                                                                                                                                                                         |          |          |          |          |   |   |      |          |  |  |  |  |     |          |          |  |  |  |     |          |          |          |  |  |     |          |          |          |          |  |      |          |          |          |          |          |      |          |          |          |          |          |     |          |          |          |          |          |      |          |          |          |          |          |     |          |          |          |          |          |       |          |          |          |          |          |  |   |   |   |   |    |      |          |  |  |  |  |     |          |          |  |  |  |      |          |          |          |  |  |     |          |          |          |          |  |       |          |          |          |          |          |
| 2 B                                                                                                                            | 2.219985                                                                                                                                                                                                                                                                                                                                                                                                                                                                                                                                                                                                                                                                                                                                                                                                                                                                                                                                                                                                                                                                                                                                                                                                                                                                                                                                                                                                                                                                                                                                                                                                                                                                                                                         | 0.000000 |          |          |          |   |   |      |          |  |  |  |  |     |          |          |  |  |  |     |          |          |          |  |  |     |          |          |          |          |  |      |          |          |          |          |          |      |          |          |          |          |          |     |          |          |          |          |          |      |          |          |          |          |          |     |          |          |          |          |          |       |          |          |          |          |          |  |   |   |   |   |    |      |          |  |  |  |  |     |          |          |  |  |  |      |          |          |          |  |  |     |          |          |          |          |  |       |          |          |          |          |          |
| 3 B                                                                                                                            | 2.300579                                                                                                                                                                                                                                                                                                                                                                                                                                                                                                                                                                                                                                                                                                                                                                                                                                                                                                                                                                                                                                                                                                                                                                                                                                                                                                                                                                                                                                                                                                                                                                                                                                                                                                                         | 1.877116 | 0.000000 |          |          |   |   |      |          |  |  |  |  |     |          |          |  |  |  |     |          |          |          |  |  |     |          |          |          |          |  |      |          |          |          |          |          |      |          |          |          |          |          |     |          |          |          |          |          |      |          |          |          |          |          |     |          |          |          |          |          |       |          |          |          |          |          |  |   |   |   |   |    |      |          |  |  |  |  |     |          |          |  |  |  |      |          |          |          |  |  |     |          |          |          |          |  |       |          |          |          |          |          |
| 4 B                                                                                                                            | 2.393312                                                                                                                                                                                                                                                                                                                                                                                                                                                                                                                                                                                                                                                                                                                                                                                                                                                                                                                                                                                                                                                                                                                                                                                                                                                                                                                                                                                                                                                                                                                                                                                                                                                                                                                         | 2.661911 | 2.749438 | 0.000000 |          |   |   |      |          |  |  |  |  |     |          |          |  |  |  |     |          |          |          |  |  |     |          |          |          |          |  |      |          |          |          |          |          |      |          |          |          |          |          |     |          |          |          |          |          |      |          |          |          |          |          |     |          |          |          |          |          |       |          |          |          |          |          |  |   |   |   |   |    |      |          |  |  |  |  |     |          |          |  |  |  |      |          |          |          |  |  |     |          |          |          |          |  |       |          |          |          |          |          |
| 5 B                                                                                                                            | 3.173311                                                                                                                                                                                                                                                                                                                                                                                                                                                                                                                                                                                                                                                                                                                                                                                                                                                                                                                                                                                                                                                                                                                                                                                                                                                                                                                                                                                                                                                                                                                                                                                                                                                                                                                         | 2.637850 | 1.980191 | 1.764941 | 0.000000 |   |   |      |          |  |  |  |  |     |          |          |  |  |  |     |          |          |          |  |  |     |          |          |          |          |  |      |          |          |          |          |          |      |          |          |          |          |          |     |          |          |          |          |          |      |          |          |          |          |          |     |          |          |          |          |          |       |          |          |          |          |          |  |   |   |   |   |    |      |          |  |  |  |  |     |          |          |  |  |  |      |          |          |          |  |  |     |          |          |          |          |  |       |          |          |          |          |          |
| 6 Ru                                                                                                                           | 3.612438                                                                                                                                                                                                                                                                                                                                                                                                                                                                                                                                                                                                                                                                                                                                                                                                                                                                                                                                                                                                                                                                                                                                                                                                                                                                                                                                                                                                                                                                                                                                                                                                                                                                                                                         | 2.177772 | 3.165204 | 2.240601 | 2.244183 |   |   |      |          |  |  |  |  |     |          |          |  |  |  |     |          |          |          |  |  |     |          |          |          |          |  |      |          |          |          |          |          |      |          |          |          |          |          |     |          |          |          |          |          |      |          |          |          |          |          |     |          |          |          |          |          |       |          |          |          |          |          |  |   |   |   |   |    |      |          |  |  |  |  |     |          |          |  |  |  |      |          |          |          |  |  |     |          |          |          |          |  |       |          |          |          |          |          |
| 7 B                                                                                                                            | 2.071618                                                                                                                                                                                                                                                                                                                                                                                                                                                                                                                                                                                                                                                                                                                                                                                                                                                                                                                                                                                                                                                                                                                                                                                                                                                                                                                                                                                                                                                                                                                                                                                                                                                                                                                         | 1.639819 | 1.895324 | 3.686698 | 3.595616 |   |   |      |          |  |  |  |  |     |          |          |  |  |  |     |          |          |          |  |  |     |          |          |          |          |  |      |          |          |          |          |          |      |          |          |          |          |          |     |          |          |          |          |          |      |          |          |          |          |          |     |          |          |          |          |          |       |          |          |          |          |          |  |   |   |   |   |    |      |          |  |  |  |  |     |          |          |  |  |  |      |          |          |          |  |  |     |          |          |          |          |  |       |          |          |          |          |          |
| 8 B                                                                                                                            | 3.486385                                                                                                                                                                                                                                                                                                                                                                                                                                                                                                                                                                                                                                                                                                                                                                                                                                                                                                                                                                                                                                                                                                                                                                                                                                                                                                                                                                                                                                                                                                                                                                                                                                                                                                                         | 1.795863 | 1.825100 | 2.940432 | 1.810377 |   |   |      |          |  |  |  |  |     |          |          |  |  |  |     |          |          |          |  |  |     |          |          |          |          |  |      |          |          |          |          |          |      |          |          |          |          |          |     |          |          |          |          |          |      |          |          |          |          |          |     |          |          |          |          |          |       |          |          |          |          |          |  |   |   |   |   |    |      |          |  |  |  |  |     |          |          |  |  |  |      |          |          |          |  |  |     |          |          |          |          |  |       |          |          |          |          |          |
| 9 B                                                                                                                            | 2.076042                                                                                                                                                                                                                                                                                                                                                                                                                                                                                                                                                                                                                                                                                                                                                                                                                                                                                                                                                                                                                                                                                                                                                                                                                                                                                                                                                                                                                                                                                                                                                                                                                                                                                                                         | 2.874573 | 1.796862 | 1.767853 | 1.743420 |   |   |      |          |  |  |  |  |     |          |          |  |  |  |     |          |          |          |  |  |     |          |          |          |          |  |      |          |          |          |          |          |      |          |          |          |          |          |     |          |          |          |          |          |      |          |          |          |          |          |     |          |          |          |          |          |       |          |          |          |          |          |  |   |   |   |   |    |      |          |  |  |  |  |     |          |          |  |  |  |      |          |          |          |  |  |     |          |          |          |          |  |       |          |          |          |          |          |
| 10 B                                                                                                                           | 2.121681                                                                                                                                                                                                                                                                                                                                                                                                                                                                                                                                                                                                                                                                                                                                                                                                                                                                                                                                                                                                                                                                                                                                                                                                                                                                                                                                                                                                                                                                                                                                                                                                                                                                                                                         | 1.857163 | 3.099586 | 1.833745 | 2.972355 |   |   |      |          |  |  |  |  |     |          |          |  |  |  |     |          |          |          |  |  |     |          |          |          |          |  |      |          |          |          |          |          |      |          |          |          |          |          |     |          |          |          |          |          |      |          |          |          |          |          |     |          |          |          |          |          |       |          |          |          |          |          |  |   |   |   |   |    |      |          |  |  |  |  |     |          |          |  |  |  |      |          |          |          |  |  |     |          |          |          |          |  |       |          |          |          |          |          |
|                                                                                                                                | 6                                                                                                                                                                                                                                                                                                                                                                                                                                                                                                                                                                                                                                                                                                                                                                                                                                                                                                                                                                                                                                                                                                                                                                                                                                                                                                                                                                                                                                                                                                                                                                                                                                                                                                                                | 7        | 8        | 9        | 10       |   |   |      |          |  |  |  |  |     |          |          |  |  |  |     |          |          |          |  |  |     |          |          |          |          |  |      |          |          |          |          |          |      |          |          |          |          |          |     |          |          |          |          |          |      |          |          |          |          |          |     |          |          |          |          |          |       |          |          |          |          |          |  |   |   |   |   |    |      |          |  |  |  |  |     |          |          |  |  |  |      |          |          |          |  |  |     |          |          |          |          |  |       |          |          |          |          |          |
| 6 Ru                                                                                                                           | 0.000000                                                                                                                                                                                                                                                                                                                                                                                                                                                                                                                                                                                                                                                                                                                                                                                                                                                                                                                                                                                                                                                                                                                                                                                                                                                                                                                                                                                                                                                                                                                                                                                                                                                                                                                         |          |          |          |          |   |   |      |          |  |  |  |  |     |          |          |  |  |  |     |          |          |          |  |  |     |          |          |          |          |  |      |          |          |          |          |          |      |          |          |          |          |          |     |          |          |          |          |          |      |          |          |          |          |          |     |          |          |          |          |          |       |          |          |          |          |          |  |   |   |   |   |    |      |          |  |  |  |  |     |          |          |  |  |  |      |          |          |          |  |  |     |          |          |          |          |  |       |          |          |          |          |          |
| 7 B                                                                                                                            | 3.792754                                                                                                                                                                                                                                                                                                                                                                                                                                                                                                                                                                                                                                                                                                                                                                                                                                                                                                                                                                                                                                                                                                                                                                                                                                                                                                                                                                                                                                                                                                                                                                                                                                                                                                                         | 0.000000 |          |          |          |   |   |      |          |  |  |  |  |     |          |          |  |  |  |     |          |          |          |  |  |     |          |          |          |          |  |      |          |          |          |          |          |      |          |          |          |          |          |     |          |          |          |          |          |      |          |          |          |          |          |     |          |          |          |          |          |       |          |          |          |          |          |  |   |   |   |   |    |      |          |  |  |  |  |     |          |          |  |  |  |      |          |          |          |  |  |     |          |          |          |          |  |       |          |          |          |          |          |
| 8 B                                                                                                                            | 2.004228                                                                                                                                                                                                                                                                                                                                                                                                                                                                                                                                                                                                                                                                                                                                                                                                                                                                                                                                                                                                                                                                                                                                                                                                                                                                                                                                                                                                                                                                                                                                                                                                                                                                                                                         | 2.858815 | 0.000000 |          |          |   |   |      |          |  |  |  |  |     |          |          |  |  |  |     |          |          |          |  |  |     |          |          |          |          |  |      |          |          |          |          |          |      |          |          |          |          |          |     |          |          |          |          |          |      |          |          |          |          |          |     |          |          |          |          |          |       |          |          |          |          |          |  |   |   |   |   |    |      |          |  |  |  |  |     |          |          |  |  |  |      |          |          |          |  |  |     |          |          |          |          |  |       |          |          |          |          |          |
| 9 B                                                                                                                            | 3.407495                                                                                                                                                                                                                                                                                                                                                                                                                                                                                                                                                                                                                                                                                                                                                                                                                                                                                                                                                                                                                                                                                                                                                                                                                                                                                                                                                                                                                                                                                                                                                                                                                                                                                                                         | 3.154607 | 2.956277 | 0.000000 |          |   |   |      |          |  |  |  |  |     |          |          |  |  |  |     |          |          |          |  |  |     |          |          |          |          |  |      |          |          |          |          |          |      |          |          |          |          |          |     |          |          |          |          |          |      |          |          |          |          |          |     |          |          |          |          |          |       |          |          |          |          |          |  |   |   |   |   |    |      |          |  |  |  |  |     |          |          |  |  |  |      |          |          |          |  |  |     |          |          |          |          |  |       |          |          |          |          |          |
| 10 B                                                                                                                           | 2.052409                                                                                                                                                                                                                                                                                                                                                                                                                                                                                                                                                                                                                                                                                                                                                                                                                                                                                                                                                                                                                                                                                                                                                                                                                                                                                                                                                                                                                                                                                                                                                                                                                                                                                                                         | 3.027042 | 3.071619 | 2.981778 | 0.000000 |   |   |      |          |  |  |  |  |     |          |          |  |  |  |     |          |          |          |  |  |     |          |          |          |          |  |      |          |          |          |          |          |      |          |          |          |          |          |     |          |          |          |          |          |      |          |          |          |          |          |     |          |          |          |          |          |       |          |          |          |          |          |  |   |   |   |   |    |      |          |  |  |  |  |     |          |          |  |  |  |      |          |          |          |  |  |     |          |          |          |          |  |       |          |          |          |          |          |
|  <p>8. -780.67256369 +25.9 C<sub>s</sub></p> | <table border="1"> <thead> <tr> <th></th> <th>1</th> <th>2</th> <th>3</th> <th>4</th> <th>5</th> </tr> </thead> <tbody> <tr><td>1 B</td><td>0.000000</td><td></td><td></td><td></td><td></td></tr> <tr><td>2 B</td><td>1.874000</td><td>0.000000</td><td></td><td></td><td></td></tr> <tr><td>3 B</td><td>3.063432</td><td>1.814830</td><td>0.000000</td><td></td><td></td></tr> <tr><td>4 B</td><td>1.814661</td><td>3.063410</td><td>3.250400</td><td>0.000000</td><td></td></tr> <tr><td>5 Ru</td><td>2.268872</td><td>2.268929</td><td>2.114335</td><td>2.114342</td><td>0.000000</td></tr> <tr><td>6 B</td><td>1.797390</td><td>1.797302</td><td>2.998801</td><td>2.998782</td><td>3.427388</td></tr> <tr><td>7 B</td><td>1.759570</td><td>2.897280</td><td>3.504800</td><td>1.758980</td><td>3.274081</td></tr> <tr><td>8 Ru</td><td>2.963762</td><td>2.963775</td><td>2.152202</td><td>2.152346</td><td>2.628326</td></tr> <tr><td>9 B</td><td>2.897404</td><td>1.759651</td><td>1.759091</td><td>3.504926</td><td>3.274194</td></tr> <tr><td>10 B</td><td>2.865929</td><td>2.865901</td><td>3.037046</td><td>3.037078</td><td>3.871247</td></tr> <tr> <td></td> <td>6</td> <td>7</td> <td>8</td> <td>9</td> <td>10</td> </tr> <tr><td>6 B</td><td>0.000000</td><td></td><td></td><td></td><td></td></tr> <tr><td>7 B</td><td>1.814191</td><td>0.000000</td><td></td><td></td><td></td></tr> <tr><td>8 Ru</td><td>2.982378</td><td>2.340741</td><td>0.000000</td><td></td><td></td></tr> <tr><td>9 B</td><td>1.814193</td><td>2.827300</td><td>2.340789</td><td>0.000000</td><td></td></tr> <tr><td>10 B</td><td>1.731345</td><td>1.748221</td><td>2.094131</td><td>1.748223</td><td>0.000000</td></tr> </tbody> </table> |          | 1        | 2        | 3        | 4 | 5 | 1 B  | 0.000000 |  |  |  |  | 2 B | 1.874000 | 0.000000 |  |  |  | 3 B | 3.063432 | 1.814830 | 0.000000 |  |  | 4 B | 1.814661 | 3.063410 | 3.250400 | 0.000000 |  | 5 Ru | 2.268872 | 2.268929 | 2.114335 | 2.114342 | 0.000000 | 6 B  | 1.797390 | 1.797302 | 2.998801 | 2.998782 | 3.427388 | 7 B | 1.759570 | 2.897280 | 3.504800 | 1.758980 | 3.274081 | 8 Ru | 2.963762 | 2.963775 | 2.152202 | 2.152346 | 2.628326 | 9 B | 2.897404 | 1.759651 | 1.759091 | 3.504926 | 3.274194 | 10 B  | 2.865929 | 2.865901 | 3.037046 | 3.037078 | 3.871247 |  | 6 | 7 | 8 | 9 | 10 | 6 B  | 0.000000 |  |  |  |  | 7 B | 1.814191 | 0.000000 |  |  |  | 8 Ru | 2.982378 | 2.340741 | 0.000000 |  |  | 9 B | 1.814193 | 2.827300 | 2.340789 | 0.000000 |  | 10 B  | 1.731345 | 1.748221 | 2.094131 | 1.748223 | 0.000000 |
|                                                                                                                                | 1                                                                                                                                                                                                                                                                                                                                                                                                                                                                                                                                                                                                                                                                                                                                                                                                                                                                                                                                                                                                                                                                                                                                                                                                                                                                                                                                                                                                                                                                                                                                                                                                                                                                                                                                | 2        | 3        | 4        | 5        |   |   |      |          |  |  |  |  |     |          |          |  |  |  |     |          |          |          |  |  |     |          |          |          |          |  |      |          |          |          |          |          |      |          |          |          |          |          |     |          |          |          |          |          |      |          |          |          |          |          |     |          |          |          |          |          |       |          |          |          |          |          |  |   |   |   |   |    |      |          |  |  |  |  |     |          |          |  |  |  |      |          |          |          |  |  |     |          |          |          |          |  |       |          |          |          |          |          |
| 1 B                                                                                                                            | 0.000000                                                                                                                                                                                                                                                                                                                                                                                                                                                                                                                                                                                                                                                                                                                                                                                                                                                                                                                                                                                                                                                                                                                                                                                                                                                                                                                                                                                                                                                                                                                                                                                                                                                                                                                         |          |          |          |          |   |   |      |          |  |  |  |  |     |          |          |  |  |  |     |          |          |          |  |  |     |          |          |          |          |  |      |          |          |          |          |          |      |          |          |          |          |          |     |          |          |          |          |          |      |          |          |          |          |          |     |          |          |          |          |          |       |          |          |          |          |          |  |   |   |   |   |    |      |          |  |  |  |  |     |          |          |  |  |  |      |          |          |          |  |  |     |          |          |          |          |  |       |          |          |          |          |          |
| 2 B                                                                                                                            | 1.874000                                                                                                                                                                                                                                                                                                                                                                                                                                                                                                                                                                                                                                                                                                                                                                                                                                                                                                                                                                                                                                                                                                                                                                                                                                                                                                                                                                                                                                                                                                                                                                                                                                                                                                                         | 0.000000 |          |          |          |   |   |      |          |  |  |  |  |     |          |          |  |  |  |     |          |          |          |  |  |     |          |          |          |          |  |      |          |          |          |          |          |      |          |          |          |          |          |     |          |          |          |          |          |      |          |          |          |          |          |     |          |          |          |          |          |       |          |          |          |          |          |  |   |   |   |   |    |      |          |  |  |  |  |     |          |          |  |  |  |      |          |          |          |  |  |     |          |          |          |          |  |       |          |          |          |          |          |
| 3 B                                                                                                                            | 3.063432                                                                                                                                                                                                                                                                                                                                                                                                                                                                                                                                                                                                                                                                                                                                                                                                                                                                                                                                                                                                                                                                                                                                                                                                                                                                                                                                                                                                                                                                                                                                                                                                                                                                                                                         | 1.814830 | 0.000000 |          |          |   |   |      |          |  |  |  |  |     |          |          |  |  |  |     |          |          |          |  |  |     |          |          |          |          |  |      |          |          |          |          |          |      |          |          |          |          |          |     |          |          |          |          |          |      |          |          |          |          |          |     |          |          |          |          |          |       |          |          |          |          |          |  |   |   |   |   |    |      |          |  |  |  |  |     |          |          |  |  |  |      |          |          |          |  |  |     |          |          |          |          |  |       |          |          |          |          |          |
| 4 B                                                                                                                            | 1.814661                                                                                                                                                                                                                                                                                                                                                                                                                                                                                                                                                                                                                                                                                                                                                                                                                                                                                                                                                                                                                                                                                                                                                                                                                                                                                                                                                                                                                                                                                                                                                                                                                                                                                                                         | 3.063410 | 3.250400 | 0.000000 |          |   |   |      |          |  |  |  |  |     |          |          |  |  |  |     |          |          |          |  |  |     |          |          |          |          |  |      |          |          |          |          |          |      |          |          |          |          |          |     |          |          |          |          |          |      |          |          |          |          |          |     |          |          |          |          |          |       |          |          |          |          |          |  |   |   |   |   |    |      |          |  |  |  |  |     |          |          |  |  |  |      |          |          |          |  |  |     |          |          |          |          |  |       |          |          |          |          |          |
| 5 Ru                                                                                                                           | 2.268872                                                                                                                                                                                                                                                                                                                                                                                                                                                                                                                                                                                                                                                                                                                                                                                                                                                                                                                                                                                                                                                                                                                                                                                                                                                                                                                                                                                                                                                                                                                                                                                                                                                                                                                         | 2.268929 | 2.114335 | 2.114342 | 0.000000 |   |   |      |          |  |  |  |  |     |          |          |  |  |  |     |          |          |          |  |  |     |          |          |          |          |  |      |          |          |          |          |          |      |          |          |          |          |          |     |          |          |          |          |          |      |          |          |          |          |          |     |          |          |          |          |          |       |          |          |          |          |          |  |   |   |   |   |    |      |          |  |  |  |  |     |          |          |  |  |  |      |          |          |          |  |  |     |          |          |          |          |  |       |          |          |          |          |          |
| 6 B                                                                                                                            | 1.797390                                                                                                                                                                                                                                                                                                                                                                                                                                                                                                                                                                                                                                                                                                                                                                                                                                                                                                                                                                                                                                                                                                                                                                                                                                                                                                                                                                                                                                                                                                                                                                                                                                                                                                                         | 1.797302 | 2.998801 | 2.998782 | 3.427388 |   |   |      |          |  |  |  |  |     |          |          |  |  |  |     |          |          |          |  |  |     |          |          |          |          |  |      |          |          |          |          |          |      |          |          |          |          |          |     |          |          |          |          |          |      |          |          |          |          |          |     |          |          |          |          |          |       |          |          |          |          |          |  |   |   |   |   |    |      |          |  |  |  |  |     |          |          |  |  |  |      |          |          |          |  |  |     |          |          |          |          |  |       |          |          |          |          |          |
| 7 B                                                                                                                            | 1.759570                                                                                                                                                                                                                                                                                                                                                                                                                                                                                                                                                                                                                                                                                                                                                                                                                                                                                                                                                                                                                                                                                                                                                                                                                                                                                                                                                                                                                                                                                                                                                                                                                                                                                                                         | 2.897280 | 3.504800 | 1.758980 | 3.274081 |   |   |      |          |  |  |  |  |     |          |          |  |  |  |     |          |          |          |  |  |     |          |          |          |          |  |      |          |          |          |          |          |      |          |          |          |          |          |     |          |          |          |          |          |      |          |          |          |          |          |     |          |          |          |          |          |       |          |          |          |          |          |  |   |   |   |   |    |      |          |  |  |  |  |     |          |          |  |  |  |      |          |          |          |  |  |     |          |          |          |          |  |       |          |          |          |          |          |
| 8 Ru                                                                                                                           | 2.963762                                                                                                                                                                                                                                                                                                                                                                                                                                                                                                                                                                                                                                                                                                                                                                                                                                                                                                                                                                                                                                                                                                                                                                                                                                                                                                                                                                                                                                                                                                                                                                                                                                                                                                                         | 2.963775 | 2.152202 | 2.152346 | 2.628326 |   |   |      |          |  |  |  |  |     |          |          |  |  |  |     |          |          |          |  |  |     |          |          |          |          |  |      |          |          |          |          |          |      |          |          |          |          |          |     |          |          |          |          |          |      |          |          |          |          |          |     |          |          |          |          |          |       |          |          |          |          |          |  |   |   |   |   |    |      |          |  |  |  |  |     |          |          |  |  |  |      |          |          |          |  |  |     |          |          |          |          |  |       |          |          |          |          |          |
| 9 B                                                                                                                            | 2.897404                                                                                                                                                                                                                                                                                                                                                                                                                                                                                                                                                                                                                                                                                                                                                                                                                                                                                                                                                                                                                                                                                                                                                                                                                                                                                                                                                                                                                                                                                                                                                                                                                                                                                                                         | 1.759651 | 1.759091 | 3.504926 | 3.274194 |   |   |      |          |  |  |  |  |     |          |          |  |  |  |     |          |          |          |  |  |     |          |          |          |          |  |      |          |          |          |          |          |      |          |          |          |          |          |     |          |          |          |          |          |      |          |          |          |          |          |     |          |          |          |          |          |       |          |          |          |          |          |  |   |   |   |   |    |      |          |  |  |  |  |     |          |          |  |  |  |      |          |          |          |  |  |     |          |          |          |          |  |       |          |          |          |          |          |
| 10 B                                                                                                                           | 2.865929                                                                                                                                                                                                                                                                                                                                                                                                                                                                                                                                                                                                                                                                                                                                                                                                                                                                                                                                                                                                                                                                                                                                                                                                                                                                                                                                                                                                                                                                                                                                                                                                                                                                                                                         | 2.865901 | 3.037046 | 3.037078 | 3.871247 |   |   |      |          |  |  |  |  |     |          |          |  |  |  |     |          |          |          |  |  |     |          |          |          |          |  |      |          |          |          |          |          |      |          |          |          |          |          |     |          |          |          |          |          |      |          |          |          |          |          |     |          |          |          |          |          |       |          |          |          |          |          |  |   |   |   |   |    |      |          |  |  |  |  |     |          |          |  |  |  |      |          |          |          |  |  |     |          |          |          |          |  |       |          |          |          |          |          |
|                                                                                                                                | 6                                                                                                                                                                                                                                                                                                                                                                                                                                                                                                                                                                                                                                                                                                                                                                                                                                                                                                                                                                                                                                                                                                                                                                                                                                                                                                                                                                                                                                                                                                                                                                                                                                                                                                                                | 7        | 8        | 9        | 10       |   |   |      |          |  |  |  |  |     |          |          |  |  |  |     |          |          |          |  |  |     |          |          |          |          |  |      |          |          |          |          |          |      |          |          |          |          |          |     |          |          |          |          |          |      |          |          |          |          |          |     |          |          |          |          |          |       |          |          |          |          |          |  |   |   |   |   |    |      |          |  |  |  |  |     |          |          |  |  |  |      |          |          |          |  |  |     |          |          |          |          |  |       |          |          |          |          |          |
| 6 B                                                                                                                            | 0.000000                                                                                                                                                                                                                                                                                                                                                                                                                                                                                                                                                                                                                                                                                                                                                                                                                                                                                                                                                                                                                                                                                                                                                                                                                                                                                                                                                                                                                                                                                                                                                                                                                                                                                                                         |          |          |          |          |   |   |      |          |  |  |  |  |     |          |          |  |  |  |     |          |          |          |  |  |     |          |          |          |          |  |      |          |          |          |          |          |      |          |          |          |          |          |     |          |          |          |          |          |      |          |          |          |          |          |     |          |          |          |          |          |       |          |          |          |          |          |  |   |   |   |   |    |      |          |  |  |  |  |     |          |          |  |  |  |      |          |          |          |  |  |     |          |          |          |          |  |       |          |          |          |          |          |
| 7 B                                                                                                                            | 1.814191                                                                                                                                                                                                                                                                                                                                                                                                                                                                                                                                                                                                                                                                                                                                                                                                                                                                                                                                                                                                                                                                                                                                                                                                                                                                                                                                                                                                                                                                                                                                                                                                                                                                                                                         | 0.000000 |          |          |          |   |   |      |          |  |  |  |  |     |          |          |  |  |  |     |          |          |          |  |  |     |          |          |          |          |  |      |          |          |          |          |          |      |          |          |          |          |          |     |          |          |          |          |          |      |          |          |          |          |          |     |          |          |          |          |          |       |          |          |          |          |          |  |   |   |   |   |    |      |          |  |  |  |  |     |          |          |  |  |  |      |          |          |          |  |  |     |          |          |          |          |  |       |          |          |          |          |          |
| 8 Ru                                                                                                                           | 2.982378                                                                                                                                                                                                                                                                                                                                                                                                                                                                                                                                                                                                                                                                                                                                                                                                                                                                                                                                                                                                                                                                                                                                                                                                                                                                                                                                                                                                                                                                                                                                                                                                                                                                                                                         | 2.340741 | 0.000000 |          |          |   |   |      |          |  |  |  |  |     |          |          |  |  |  |     |          |          |          |  |  |     |          |          |          |          |  |      |          |          |          |          |          |      |          |          |          |          |          |     |          |          |          |          |          |      |          |          |          |          |          |     |          |          |          |          |          |       |          |          |          |          |          |  |   |   |   |   |    |      |          |  |  |  |  |     |          |          |  |  |  |      |          |          |          |  |  |     |          |          |          |          |  |       |          |          |          |          |          |
| 9 B                                                                                                                            | 1.814193                                                                                                                                                                                                                                                                                                                                                                                                                                                                                                                                                                                                                                                                                                                                                                                                                                                                                                                                                                                                                                                                                                                                                                                                                                                                                                                                                                                                                                                                                                                                                                                                                                                                                                                         | 2.827300 | 2.340789 | 0.000000 |          |   |   |      |          |  |  |  |  |     |          |          |  |  |  |     |          |          |          |  |  |     |          |          |          |          |  |      |          |          |          |          |          |      |          |          |          |          |          |     |          |          |          |          |          |      |          |          |          |          |          |     |          |          |          |          |          |       |          |          |          |          |          |  |   |   |   |   |    |      |          |  |  |  |  |     |          |          |  |  |  |      |          |          |          |  |  |     |          |          |          |          |  |       |          |          |          |          |          |
| 10 B                                                                                                                           | 1.731345                                                                                                                                                                                                                                                                                                                                                                                                                                                                                                                                                                                                                                                                                                                                                                                                                                                                                                                                                                                                                                                                                                                                                                                                                                                                                                                                                                                                                                                                                                                                                                                                                                                                                                                         | 1.748221 | 2.094131 | 1.748223 | 0.000000 |   |   |      |          |  |  |  |  |     |          |          |  |  |  |     |          |          |          |  |  |     |          |          |          |          |  |      |          |          |          |          |          |      |          |          |          |          |          |     |          |          |          |          |          |      |          |          |          |          |          |     |          |          |          |          |          |       |          |          |          |          |          |  |   |   |   |   |    |      |          |  |  |  |  |     |          |          |  |  |  |      |          |          |          |  |  |     |          |          |          |          |  |       |          |          |          |          |          |
|  <p>9. -780.67142058 +26.6</p>              | <table border="1"> <thead> <tr> <th></th> <th>1</th> <th>2</th> <th>3</th> <th>4</th> <th>5</th> </tr> </thead> <tbody> <tr><td>1 Ru</td><td>0.000000</td><td></td><td></td><td></td><td></td></tr> <tr><td>2 B</td><td>2.368961</td><td>0.000000</td><td></td><td></td><td></td></tr> <tr><td>3 B</td><td>2.364435</td><td>2.814104</td><td>0.000000</td><td></td><td></td></tr> <tr><td>4 B</td><td>2.232343</td><td>2.441267</td><td>2.624892</td><td>0.000000</td><td></td></tr> <tr><td>5 B</td><td>3.090759</td><td>2.901553</td><td>1.796668</td><td>1.767506</td><td>0.000000</td></tr> <tr><td>6 B</td><td>3.220902</td><td>1.778700</td><td>2.900815</td><td>1.805118</td><td>1.871606</td></tr> <tr><td>7 B</td><td>2.038785</td><td>1.784543</td><td>1.766923</td><td>3.082425</td><td>2.948191</td></tr> <tr><td>8 B</td><td>3.082120</td><td>1.908765</td><td>1.771259</td><td>2.680181</td><td>1.812381</td></tr> <tr><td>9 B</td><td>2.094535</td><td>3.313867</td><td>1.740812</td><td>1.717152</td><td>1.764131</td></tr> <tr><td>10 Ru</td><td>2.842803</td><td>2.213945</td><td>4.094778</td><td>1.982889</td><td>3.481088</td></tr> <tr> <td></td> <td>6</td> <td>7</td> <td>8</td> <td>9</td> <td>10</td> </tr> <tr><td>6 B</td><td>0.000000</td><td></td><td></td><td></td><td></td></tr> <tr><td>7 B</td><td>2.922201</td><td>0.000000</td><td></td><td></td><td></td></tr> <tr><td>8 B</td><td>1.760393</td><td>1.819230</td><td>0.000000</td><td></td><td></td></tr> <tr><td>9 B</td><td>3.017534</td><td>2.941475</td><td>2.896208</td><td>0.000000</td><td></td></tr> <tr><td>10 Ru</td><td>2.270651</td><td>3.665329</td><td>3.580350</td><td>3.545719</td><td>0.000000</td></tr> </tbody> </table> |          | 1        | 2        | 3        | 4 | 5 | 1 Ru | 0.000000 |  |  |  |  | 2 B | 2.368961 | 0.000000 |  |  |  | 3 B | 2.364435 | 2.814104 | 0.000000 |  |  | 4 B | 2.232343 | 2.441267 | 2.624892 | 0.000000 |  | 5 B  | 3.090759 | 2.901553 | 1.796668 | 1.767506 | 0.000000 | 6 B  | 3.220902 | 1.778700 | 2.900815 | 1.805118 | 1.871606 | 7 B | 2.038785 | 1.784543 | 1.766923 | 3.082425 | 2.948191 | 8 B  | 3.082120 | 1.908765 | 1.771259 | 2.680181 | 1.812381 | 9 B | 2.094535 | 3.313867 | 1.740812 | 1.717152 | 1.764131 | 10 Ru | 2.842803 | 2.213945 | 4.094778 | 1.982889 | 3.481088 |  | 6 | 7 | 8 | 9 | 10 | 6 B  | 0.000000 |  |  |  |  | 7 B | 2.922201 | 0.000000 |  |  |  | 8 B  | 1.760393 | 1.819230 | 0.000000 |  |  | 9 B | 3.017534 | 2.941475 | 2.896208 | 0.000000 |  | 10 Ru | 2.270651 | 3.665329 | 3.580350 | 3.545719 | 0.000000 |
|                                                                                                                                | 1                                                                                                                                                                                                                                                                                                                                                                                                                                                                                                                                                                                                                                                                                                                                                                                                                                                                                                                                                                                                                                                                                                                                                                                                                                                                                                                                                                                                                                                                                                                                                                                                                                                                                                                                | 2        | 3        | 4        | 5        |   |   |      |          |  |  |  |  |     |          |          |  |  |  |     |          |          |          |  |  |     |          |          |          |          |  |      |          |          |          |          |          |      |          |          |          |          |          |     |          |          |          |          |          |      |          |          |          |          |          |     |          |          |          |          |          |       |          |          |          |          |          |  |   |   |   |   |    |      |          |  |  |  |  |     |          |          |  |  |  |      |          |          |          |  |  |     |          |          |          |          |  |       |          |          |          |          |          |
| 1 Ru                                                                                                                           | 0.000000                                                                                                                                                                                                                                                                                                                                                                                                                                                                                                                                                                                                                                                                                                                                                                                                                                                                                                                                                                                                                                                                                                                                                                                                                                                                                                                                                                                                                                                                                                                                                                                                                                                                                                                         |          |          |          |          |   |   |      |          |  |  |  |  |     |          |          |  |  |  |     |          |          |          |  |  |     |          |          |          |          |  |      |          |          |          |          |          |      |          |          |          |          |          |     |          |          |          |          |          |      |          |          |          |          |          |     |          |          |          |          |          |       |          |          |          |          |          |  |   |   |   |   |    |      |          |  |  |  |  |     |          |          |  |  |  |      |          |          |          |  |  |     |          |          |          |          |  |       |          |          |          |          |          |
| 2 B                                                                                                                            | 2.368961                                                                                                                                                                                                                                                                                                                                                                                                                                                                                                                                                                                                                                                                                                                                                                                                                                                                                                                                                                                                                                                                                                                                                                                                                                                                                                                                                                                                                                                                                                                                                                                                                                                                                                                         | 0.000000 |          |          |          |   |   |      |          |  |  |  |  |     |          |          |  |  |  |     |          |          |          |  |  |     |          |          |          |          |  |      |          |          |          |          |          |      |          |          |          |          |          |     |          |          |          |          |          |      |          |          |          |          |          |     |          |          |          |          |          |       |          |          |          |          |          |  |   |   |   |   |    |      |          |  |  |  |  |     |          |          |  |  |  |      |          |          |          |  |  |     |          |          |          |          |  |       |          |          |          |          |          |
| 3 B                                                                                                                            | 2.364435                                                                                                                                                                                                                                                                                                                                                                                                                                                                                                                                                                                                                                                                                                                                                                                                                                                                                                                                                                                                                                                                                                                                                                                                                                                                                                                                                                                                                                                                                                                                                                                                                                                                                                                         | 2.814104 | 0.000000 |          |          |   |   |      |          |  |  |  |  |     |          |          |  |  |  |     |          |          |          |  |  |     |          |          |          |          |  |      |          |          |          |          |          |      |          |          |          |          |          |     |          |          |          |          |          |      |          |          |          |          |          |     |          |          |          |          |          |       |          |          |          |          |          |  |   |   |   |   |    |      |          |  |  |  |  |     |          |          |  |  |  |      |          |          |          |  |  |     |          |          |          |          |  |       |          |          |          |          |          |
| 4 B                                                                                                                            | 2.232343                                                                                                                                                                                                                                                                                                                                                                                                                                                                                                                                                                                                                                                                                                                                                                                                                                                                                                                                                                                                                                                                                                                                                                                                                                                                                                                                                                                                                                                                                                                                                                                                                                                                                                                         | 2.441267 | 2.624892 | 0.000000 |          |   |   |      |          |  |  |  |  |     |          |          |  |  |  |     |          |          |          |  |  |     |          |          |          |          |  |      |          |          |          |          |          |      |          |          |          |          |          |     |          |          |          |          |          |      |          |          |          |          |          |     |          |          |          |          |          |       |          |          |          |          |          |  |   |   |   |   |    |      |          |  |  |  |  |     |          |          |  |  |  |      |          |          |          |  |  |     |          |          |          |          |  |       |          |          |          |          |          |
| 5 B                                                                                                                            | 3.090759                                                                                                                                                                                                                                                                                                                                                                                                                                                                                                                                                                                                                                                                                                                                                                                                                                                                                                                                                                                                                                                                                                                                                                                                                                                                                                                                                                                                                                                                                                                                                                                                                                                                                                                         | 2.901553 | 1.796668 | 1.767506 | 0.000000 |   |   |      |          |  |  |  |  |     |          |          |  |  |  |     |          |          |          |  |  |     |          |          |          |          |  |      |          |          |          |          |          |      |          |          |          |          |          |     |          |          |          |          |          |      |          |          |          |          |          |     |          |          |          |          |          |       |          |          |          |          |          |  |   |   |   |   |    |      |          |  |  |  |  |     |          |          |  |  |  |      |          |          |          |  |  |     |          |          |          |          |  |       |          |          |          |          |          |
| 6 B                                                                                                                            | 3.220902                                                                                                                                                                                                                                                                                                                                                                                                                                                                                                                                                                                                                                                                                                                                                                                                                                                                                                                                                                                                                                                                                                                                                                                                                                                                                                                                                                                                                                                                                                                                                                                                                                                                                                                         | 1.778700 | 2.900815 | 1.805118 | 1.871606 |   |   |      |          |  |  |  |  |     |          |          |  |  |  |     |          |          |          |  |  |     |          |          |          |          |  |      |          |          |          |          |          |      |          |          |          |          |          |     |          |          |          |          |          |      |          |          |          |          |          |     |          |          |          |          |          |       |          |          |          |          |          |  |   |   |   |   |    |      |          |  |  |  |  |     |          |          |  |  |  |      |          |          |          |  |  |     |          |          |          |          |  |       |          |          |          |          |          |
| 7 B                                                                                                                            | 2.038785                                                                                                                                                                                                                                                                                                                                                                                                                                                                                                                                                                                                                                                                                                                                                                                                                                                                                                                                                                                                                                                                                                                                                                                                                                                                                                                                                                                                                                                                                                                                                                                                                                                                                                                         | 1.784543 | 1.766923 | 3.082425 | 2.948191 |   |   |      |          |  |  |  |  |     |          |          |  |  |  |     |          |          |          |  |  |     |          |          |          |          |  |      |          |          |          |          |          |      |          |          |          |          |          |     |          |          |          |          |          |      |          |          |          |          |          |     |          |          |          |          |          |       |          |          |          |          |          |  |   |   |   |   |    |      |          |  |  |  |  |     |          |          |  |  |  |      |          |          |          |  |  |     |          |          |          |          |  |       |          |          |          |          |          |
| 8 B                                                                                                                            | 3.082120                                                                                                                                                                                                                                                                                                                                                                                                                                                                                                                                                                                                                                                                                                                                                                                                                                                                                                                                                                                                                                                                                                                                                                                                                                                                                                                                                                                                                                                                                                                                                                                                                                                                                                                         | 1.908765 | 1.771259 | 2.680181 | 1.812381 |   |   |      |          |  |  |  |  |     |          |          |  |  |  |     |          |          |          |  |  |     |          |          |          |          |  |      |          |          |          |          |          |      |          |          |          |          |          |     |          |          |          |          |          |      |          |          |          |          |          |     |          |          |          |          |          |       |          |          |          |          |          |  |   |   |   |   |    |      |          |  |  |  |  |     |          |          |  |  |  |      |          |          |          |  |  |     |          |          |          |          |  |       |          |          |          |          |          |
| 9 B                                                                                                                            | 2.094535                                                                                                                                                                                                                                                                                                                                                                                                                                                                                                                                                                                                                                                                                                                                                                                                                                                                                                                                                                                                                                                                                                                                                                                                                                                                                                                                                                                                                                                                                                                                                                                                                                                                                                                         | 3.313867 | 1.740812 | 1.717152 | 1.764131 |   |   |      |          |  |  |  |  |     |          |          |  |  |  |     |          |          |          |  |  |     |          |          |          |          |  |      |          |          |          |          |          |      |          |          |          |          |          |     |          |          |          |          |          |      |          |          |          |          |          |     |          |          |          |          |          |       |          |          |          |          |          |  |   |   |   |   |    |      |          |  |  |  |  |     |          |          |  |  |  |      |          |          |          |  |  |     |          |          |          |          |  |       |          |          |          |          |          |
| 10 Ru                                                                                                                          | 2.842803                                                                                                                                                                                                                                                                                                                                                                                                                                                                                                                                                                                                                                                                                                                                                                                                                                                                                                                                                                                                                                                                                                                                                                                                                                                                                                                                                                                                                                                                                                                                                                                                                                                                                                                         | 2.213945 | 4.094778 | 1.982889 | 3.481088 |   |   |      |          |  |  |  |  |     |          |          |  |  |  |     |          |          |          |  |  |     |          |          |          |          |  |      |          |          |          |          |          |      |          |          |          |          |          |     |          |          |          |          |          |      |          |          |          |          |          |     |          |          |          |          |          |       |          |          |          |          |          |  |   |   |   |   |    |      |          |  |  |  |  |     |          |          |  |  |  |      |          |          |          |  |  |     |          |          |          |          |  |       |          |          |          |          |          |
|                                                                                                                                | 6                                                                                                                                                                                                                                                                                                                                                                                                                                                                                                                                                                                                                                                                                                                                                                                                                                                                                                                                                                                                                                                                                                                                                                                                                                                                                                                                                                                                                                                                                                                                                                                                                                                                                                                                | 7        | 8        | 9        | 10       |   |   |      |          |  |  |  |  |     |          |          |  |  |  |     |          |          |          |  |  |     |          |          |          |          |  |      |          |          |          |          |          |      |          |          |          |          |          |     |          |          |          |          |          |      |          |          |          |          |          |     |          |          |          |          |          |       |          |          |          |          |          |  |   |   |   |   |    |      |          |  |  |  |  |     |          |          |  |  |  |      |          |          |          |  |  |     |          |          |          |          |  |       |          |          |          |          |          |
| 6 B                                                                                                                            | 0.000000                                                                                                                                                                                                                                                                                                                                                                                                                                                                                                                                                                                                                                                                                                                                                                                                                                                                                                                                                                                                                                                                                                                                                                                                                                                                                                                                                                                                                                                                                                                                                                                                                                                                                                                         |          |          |          |          |   |   |      |          |  |  |  |  |     |          |          |  |  |  |     |          |          |          |  |  |     |          |          |          |          |  |      |          |          |          |          |          |      |          |          |          |          |          |     |          |          |          |          |          |      |          |          |          |          |          |     |          |          |          |          |          |       |          |          |          |          |          |  |   |   |   |   |    |      |          |  |  |  |  |     |          |          |  |  |  |      |          |          |          |  |  |     |          |          |          |          |  |       |          |          |          |          |          |
| 7 B                                                                                                                            | 2.922201                                                                                                                                                                                                                                                                                                                                                                                                                                                                                                                                                                                                                                                                                                                                                                                                                                                                                                                                                                                                                                                                                                                                                                                                                                                                                                                                                                                                                                                                                                                                                                                                                                                                                                                         | 0.000000 |          |          |          |   |   |      |          |  |  |  |  |     |          |          |  |  |  |     |          |          |          |  |  |     |          |          |          |          |  |      |          |          |          |          |          |      |          |          |          |          |          |     |          |          |          |          |          |      |          |          |          |          |          |     |          |          |          |          |          |       |          |          |          |          |          |  |   |   |   |   |    |      |          |  |  |  |  |     |          |          |  |  |  |      |          |          |          |  |  |     |          |          |          |          |  |       |          |          |          |          |          |
| 8 B                                                                                                                            | 1.760393                                                                                                                                                                                                                                                                                                                                                                                                                                                                                                                                                                                                                                                                                                                                                                                                                                                                                                                                                                                                                                                                                                                                                                                                                                                                                                                                                                                                                                                                                                                                                                                                                                                                                                                         | 1.819230 | 0.000000 |          |          |   |   |      |          |  |  |  |  |     |          |          |  |  |  |     |          |          |          |  |  |     |          |          |          |          |  |      |          |          |          |          |          |      |          |          |          |          |          |     |          |          |          |          |          |      |          |          |          |          |          |     |          |          |          |          |          |       |          |          |          |          |          |  |   |   |   |   |    |      |          |  |  |  |  |     |          |          |  |  |  |      |          |          |          |  |  |     |          |          |          |          |  |       |          |          |          |          |          |
| 9 B                                                                                                                            | 3.017534                                                                                                                                                                                                                                                                                                                                                                                                                                                                                                                                                                                                                                                                                                                                                                                                                                                                                                                                                                                                                                                                                                                                                                                                                                                                                                                                                                                                                                                                                                                                                                                                                                                                                                                         | 2.941475 | 2.896208 | 0.000000 |          |   |   |      |          |  |  |  |  |     |          |          |  |  |  |     |          |          |          |  |  |     |          |          |          |          |  |      |          |          |          |          |          |      |          |          |          |          |          |     |          |          |          |          |          |      |          |          |          |          |          |     |          |          |          |          |          |       |          |          |          |          |          |  |   |   |   |   |    |      |          |  |  |  |  |     |          |          |  |  |  |      |          |          |          |  |  |     |          |          |          |          |  |       |          |          |          |          |          |
| 10 Ru                                                                                                                          | 2.270651                                                                                                                                                                                                                                                                                                                                                                                                                                                                                                                                                                                                                                                                                                                                                                                                                                                                                                                                                                                                                                                                                                                                                                                                                                                                                                                                                                                                                                                                                                                                                                                                                                                                                                                         | 3.665329 | 3.580350 | 3.545719 | 0.000000 |   |   |      |          |  |  |  |  |     |          |          |  |  |  |     |          |          |          |  |  |     |          |          |          |          |  |      |          |          |          |          |          |      |          |          |          |          |          |     |          |          |          |          |          |      |          |          |          |          |          |     |          |          |          |          |          |       |          |          |          |          |          |  |   |   |   |   |    |      |          |  |  |  |  |     |          |          |  |  |  |      |          |          |          |  |  |     |          |          |          |          |  |       |          |          |          |          |          |

| 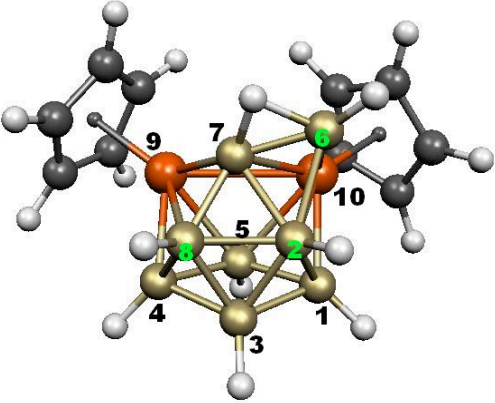 <p>10. -780.66957763 +27.7</p>                | <table border="1"> <thead> <tr> <th></th> <th>1</th> <th>2</th> <th>3</th> <th>4</th> <th>5</th> </tr> </thead> <tbody> <tr><td>1 B</td><td>0.000000</td><td></td><td></td><td></td><td></td></tr> <tr><td>2 B</td><td>1.804283</td><td>0.000000</td><td></td><td></td><td></td></tr> <tr><td>3 B</td><td>1.748904</td><td>1.805711</td><td>0.000000</td><td></td><td></td></tr> <tr><td>4 B</td><td>2.901342</td><td>2.943096</td><td>1.769376</td><td>0.000000</td><td></td></tr> <tr><td>5 B</td><td>1.787636</td><td>2.728035</td><td>2.038284</td><td>1.808372</td><td>0.000000</td></tr> <tr><td>6 B</td><td>3.113623</td><td>1.934636</td><td>3.621149</td><td>4.219987</td><td>3.739683</td></tr> <tr><td>7 B</td><td>2.958272</td><td>1.819866</td><td>2.835806</td><td>2.844264</td><td>2.848029</td></tr> <tr><td>8 B</td><td>2.921496</td><td>1.869828</td><td>1.772330</td><td>1.759742</td><td>2.709044</td></tr> <tr><td>9 Ru</td><td>3.473380</td><td>3.229759</td><td>3.147961</td><td>2.017683</td><td>2.216071</td></tr> <tr><td>10 Ru</td><td>2.060689</td><td>2.316274</td><td>3.188887</td><td>3.537458</td><td>2.272817</td></tr> <tr> <td></td> <td>6</td> <td>7</td> <td>8</td> <td>9</td> <td>10</td> </tr> <tr><td>6 B</td><td>0.000000</td><td></td><td></td><td></td><td></td></tr> <tr><td>7 B</td><td>1.637911</td><td>0.000000</td><td></td><td></td><td></td></tr> <tr><td>8 B</td><td>3.030576</td><td>1.741622</td><td>0.000000</td><td></td><td></td></tr> <tr><td>9 Ru</td><td>3.483438</td><td>2.005039</td><td>2.308783</td><td>0.000000</td><td></td></tr> <tr><td>10 Ru</td><td>2.064834</td><td>2.165934</td><td>3.277970</td><td>2.802793</td><td>0.000000</td></tr> </tbody> </table> |          | 1        | 2        | 3        | 4 | 5 | 1 B | 0.000000 |  |  |  |  | 2 B  | 1.804283 | 0.000000 |  |  |  | 3 B  | 1.748904 | 1.805711 | 0.000000 |  |  | 4 B | 2.901342 | 2.943096 | 1.769376 | 0.000000 |  | 5 B  | 1.787636 | 2.728035 | 2.038284 | 1.808372 | 0.000000 | 6 B | 3.113623 | 1.934636 | 3.621149 | 4.219987 | 3.739683 | 7 B  | 2.958272 | 1.819866 | 2.835806 | 2.844264 | 2.848029 | 8 B | 2.921496 | 1.869828 | 1.772330 | 1.759742 | 2.709044 | 9 Ru | 3.473380 | 3.229759 | 3.147961 | 2.017683 | 2.216071 | 10 Ru | 2.060689 | 2.316274 | 3.188887 | 3.537458 | 2.272817 |  | 6 | 7 | 8 | 9 | 10 | 6 B | 0.000000 |  |  |  |  | 7 B  | 1.637911 | 0.000000 |  |  |  | 8 B | 3.030576 | 1.741622 | 0.000000 |  |  | 9 Ru | 3.483438 | 2.005039 | 2.308783 | 0.000000 |  | 10 Ru | 2.064834 | 2.165934 | 3.277970 | 2.802793 | 0.000000 |
|---------------------------------------------------------------------------------------------------------------------------------|-----------------------------------------------------------------------------------------------------------------------------------------------------------------------------------------------------------------------------------------------------------------------------------------------------------------------------------------------------------------------------------------------------------------------------------------------------------------------------------------------------------------------------------------------------------------------------------------------------------------------------------------------------------------------------------------------------------------------------------------------------------------------------------------------------------------------------------------------------------------------------------------------------------------------------------------------------------------------------------------------------------------------------------------------------------------------------------------------------------------------------------------------------------------------------------------------------------------------------------------------------------------------------------------------------------------------------------------------------------------------------------------------------------------------------------------------------------------------------------------------------------------------------------------------------------------------------------------------------------------------------------------------------------------------------------------------------------------------------------|----------|----------|----------|----------|---|---|-----|----------|--|--|--|--|------|----------|----------|--|--|--|------|----------|----------|----------|--|--|-----|----------|----------|----------|----------|--|------|----------|----------|----------|----------|----------|-----|----------|----------|----------|----------|----------|------|----------|----------|----------|----------|----------|-----|----------|----------|----------|----------|----------|------|----------|----------|----------|----------|----------|-------|----------|----------|----------|----------|----------|--|---|---|---|---|----|-----|----------|--|--|--|--|------|----------|----------|--|--|--|-----|----------|----------|----------|--|--|------|----------|----------|----------|----------|--|-------|----------|----------|----------|----------|----------|
|                                                                                                                                 | 1                                                                                                                                                                                                                                                                                                                                                                                                                                                                                                                                                                                                                                                                                                                                                                                                                                                                                                                                                                                                                                                                                                                                                                                                                                                                                                                                                                                                                                                                                                                                                                                                                                                                                                                                 | 2        | 3        | 4        | 5        |   |   |     |          |  |  |  |  |      |          |          |  |  |  |      |          |          |          |  |  |     |          |          |          |          |  |      |          |          |          |          |          |     |          |          |          |          |          |      |          |          |          |          |          |     |          |          |          |          |          |      |          |          |          |          |          |       |          |          |          |          |          |  |   |   |   |   |    |     |          |  |  |  |  |      |          |          |  |  |  |     |          |          |          |  |  |      |          |          |          |          |  |       |          |          |          |          |          |
| 1 B                                                                                                                             | 0.000000                                                                                                                                                                                                                                                                                                                                                                                                                                                                                                                                                                                                                                                                                                                                                                                                                                                                                                                                                                                                                                                                                                                                                                                                                                                                                                                                                                                                                                                                                                                                                                                                                                                                                                                          |          |          |          |          |   |   |     |          |  |  |  |  |      |          |          |  |  |  |      |          |          |          |  |  |     |          |          |          |          |  |      |          |          |          |          |          |     |          |          |          |          |          |      |          |          |          |          |          |     |          |          |          |          |          |      |          |          |          |          |          |       |          |          |          |          |          |  |   |   |   |   |    |     |          |  |  |  |  |      |          |          |  |  |  |     |          |          |          |  |  |      |          |          |          |          |  |       |          |          |          |          |          |
| 2 B                                                                                                                             | 1.804283                                                                                                                                                                                                                                                                                                                                                                                                                                                                                                                                                                                                                                                                                                                                                                                                                                                                                                                                                                                                                                                                                                                                                                                                                                                                                                                                                                                                                                                                                                                                                                                                                                                                                                                          | 0.000000 |          |          |          |   |   |     |          |  |  |  |  |      |          |          |  |  |  |      |          |          |          |  |  |     |          |          |          |          |  |      |          |          |          |          |          |     |          |          |          |          |          |      |          |          |          |          |          |     |          |          |          |          |          |      |          |          |          |          |          |       |          |          |          |          |          |  |   |   |   |   |    |     |          |  |  |  |  |      |          |          |  |  |  |     |          |          |          |  |  |      |          |          |          |          |  |       |          |          |          |          |          |
| 3 B                                                                                                                             | 1.748904                                                                                                                                                                                                                                                                                                                                                                                                                                                                                                                                                                                                                                                                                                                                                                                                                                                                                                                                                                                                                                                                                                                                                                                                                                                                                                                                                                                                                                                                                                                                                                                                                                                                                                                          | 1.805711 | 0.000000 |          |          |   |   |     |          |  |  |  |  |      |          |          |  |  |  |      |          |          |          |  |  |     |          |          |          |          |  |      |          |          |          |          |          |     |          |          |          |          |          |      |          |          |          |          |          |     |          |          |          |          |          |      |          |          |          |          |          |       |          |          |          |          |          |  |   |   |   |   |    |     |          |  |  |  |  |      |          |          |  |  |  |     |          |          |          |  |  |      |          |          |          |          |  |       |          |          |          |          |          |
| 4 B                                                                                                                             | 2.901342                                                                                                                                                                                                                                                                                                                                                                                                                                                                                                                                                                                                                                                                                                                                                                                                                                                                                                                                                                                                                                                                                                                                                                                                                                                                                                                                                                                                                                                                                                                                                                                                                                                                                                                          | 2.943096 | 1.769376 | 0.000000 |          |   |   |     |          |  |  |  |  |      |          |          |  |  |  |      |          |          |          |  |  |     |          |          |          |          |  |      |          |          |          |          |          |     |          |          |          |          |          |      |          |          |          |          |          |     |          |          |          |          |          |      |          |          |          |          |          |       |          |          |          |          |          |  |   |   |   |   |    |     |          |  |  |  |  |      |          |          |  |  |  |     |          |          |          |  |  |      |          |          |          |          |  |       |          |          |          |          |          |
| 5 B                                                                                                                             | 1.787636                                                                                                                                                                                                                                                                                                                                                                                                                                                                                                                                                                                                                                                                                                                                                                                                                                                                                                                                                                                                                                                                                                                                                                                                                                                                                                                                                                                                                                                                                                                                                                                                                                                                                                                          | 2.728035 | 2.038284 | 1.808372 | 0.000000 |   |   |     |          |  |  |  |  |      |          |          |  |  |  |      |          |          |          |  |  |     |          |          |          |          |  |      |          |          |          |          |          |     |          |          |          |          |          |      |          |          |          |          |          |     |          |          |          |          |          |      |          |          |          |          |          |       |          |          |          |          |          |  |   |   |   |   |    |     |          |  |  |  |  |      |          |          |  |  |  |     |          |          |          |  |  |      |          |          |          |          |  |       |          |          |          |          |          |
| 6 B                                                                                                                             | 3.113623                                                                                                                                                                                                                                                                                                                                                                                                                                                                                                                                                                                                                                                                                                                                                                                                                                                                                                                                                                                                                                                                                                                                                                                                                                                                                                                                                                                                                                                                                                                                                                                                                                                                                                                          | 1.934636 | 3.621149 | 4.219987 | 3.739683 |   |   |     |          |  |  |  |  |      |          |          |  |  |  |      |          |          |          |  |  |     |          |          |          |          |  |      |          |          |          |          |          |     |          |          |          |          |          |      |          |          |          |          |          |     |          |          |          |          |          |      |          |          |          |          |          |       |          |          |          |          |          |  |   |   |   |   |    |     |          |  |  |  |  |      |          |          |  |  |  |     |          |          |          |  |  |      |          |          |          |          |  |       |          |          |          |          |          |
| 7 B                                                                                                                             | 2.958272                                                                                                                                                                                                                                                                                                                                                                                                                                                                                                                                                                                                                                                                                                                                                                                                                                                                                                                                                                                                                                                                                                                                                                                                                                                                                                                                                                                                                                                                                                                                                                                                                                                                                                                          | 1.819866 | 2.835806 | 2.844264 | 2.848029 |   |   |     |          |  |  |  |  |      |          |          |  |  |  |      |          |          |          |  |  |     |          |          |          |          |  |      |          |          |          |          |          |     |          |          |          |          |          |      |          |          |          |          |          |     |          |          |          |          |          |      |          |          |          |          |          |       |          |          |          |          |          |  |   |   |   |   |    |     |          |  |  |  |  |      |          |          |  |  |  |     |          |          |          |  |  |      |          |          |          |          |  |       |          |          |          |          |          |
| 8 B                                                                                                                             | 2.921496                                                                                                                                                                                                                                                                                                                                                                                                                                                                                                                                                                                                                                                                                                                                                                                                                                                                                                                                                                                                                                                                                                                                                                                                                                                                                                                                                                                                                                                                                                                                                                                                                                                                                                                          | 1.869828 | 1.772330 | 1.759742 | 2.709044 |   |   |     |          |  |  |  |  |      |          |          |  |  |  |      |          |          |          |  |  |     |          |          |          |          |  |      |          |          |          |          |          |     |          |          |          |          |          |      |          |          |          |          |          |     |          |          |          |          |          |      |          |          |          |          |          |       |          |          |          |          |          |  |   |   |   |   |    |     |          |  |  |  |  |      |          |          |  |  |  |     |          |          |          |  |  |      |          |          |          |          |  |       |          |          |          |          |          |
| 9 Ru                                                                                                                            | 3.473380                                                                                                                                                                                                                                                                                                                                                                                                                                                                                                                                                                                                                                                                                                                                                                                                                                                                                                                                                                                                                                                                                                                                                                                                                                                                                                                                                                                                                                                                                                                                                                                                                                                                                                                          | 3.229759 | 3.147961 | 2.017683 | 2.216071 |   |   |     |          |  |  |  |  |      |          |          |  |  |  |      |          |          |          |  |  |     |          |          |          |          |  |      |          |          |          |          |          |     |          |          |          |          |          |      |          |          |          |          |          |     |          |          |          |          |          |      |          |          |          |          |          |       |          |          |          |          |          |  |   |   |   |   |    |     |          |  |  |  |  |      |          |          |  |  |  |     |          |          |          |  |  |      |          |          |          |          |  |       |          |          |          |          |          |
| 10 Ru                                                                                                                           | 2.060689                                                                                                                                                                                                                                                                                                                                                                                                                                                                                                                                                                                                                                                                                                                                                                                                                                                                                                                                                                                                                                                                                                                                                                                                                                                                                                                                                                                                                                                                                                                                                                                                                                                                                                                          | 2.316274 | 3.188887 | 3.537458 | 2.272817 |   |   |     |          |  |  |  |  |      |          |          |  |  |  |      |          |          |          |  |  |     |          |          |          |          |  |      |          |          |          |          |          |     |          |          |          |          |          |      |          |          |          |          |          |     |          |          |          |          |          |      |          |          |          |          |          |       |          |          |          |          |          |  |   |   |   |   |    |     |          |  |  |  |  |      |          |          |  |  |  |     |          |          |          |  |  |      |          |          |          |          |  |       |          |          |          |          |          |
|                                                                                                                                 | 6                                                                                                                                                                                                                                                                                                                                                                                                                                                                                                                                                                                                                                                                                                                                                                                                                                                                                                                                                                                                                                                                                                                                                                                                                                                                                                                                                                                                                                                                                                                                                                                                                                                                                                                                 | 7        | 8        | 9        | 10       |   |   |     |          |  |  |  |  |      |          |          |  |  |  |      |          |          |          |  |  |     |          |          |          |          |  |      |          |          |          |          |          |     |          |          |          |          |          |      |          |          |          |          |          |     |          |          |          |          |          |      |          |          |          |          |          |       |          |          |          |          |          |  |   |   |   |   |    |     |          |  |  |  |  |      |          |          |  |  |  |     |          |          |          |  |  |      |          |          |          |          |  |       |          |          |          |          |          |
| 6 B                                                                                                                             | 0.000000                                                                                                                                                                                                                                                                                                                                                                                                                                                                                                                                                                                                                                                                                                                                                                                                                                                                                                                                                                                                                                                                                                                                                                                                                                                                                                                                                                                                                                                                                                                                                                                                                                                                                                                          |          |          |          |          |   |   |     |          |  |  |  |  |      |          |          |  |  |  |      |          |          |          |  |  |     |          |          |          |          |  |      |          |          |          |          |          |     |          |          |          |          |          |      |          |          |          |          |          |     |          |          |          |          |          |      |          |          |          |          |          |       |          |          |          |          |          |  |   |   |   |   |    |     |          |  |  |  |  |      |          |          |  |  |  |     |          |          |          |  |  |      |          |          |          |          |  |       |          |          |          |          |          |
| 7 B                                                                                                                             | 1.637911                                                                                                                                                                                                                                                                                                                                                                                                                                                                                                                                                                                                                                                                                                                                                                                                                                                                                                                                                                                                                                                                                                                                                                                                                                                                                                                                                                                                                                                                                                                                                                                                                                                                                                                          | 0.000000 |          |          |          |   |   |     |          |  |  |  |  |      |          |          |  |  |  |      |          |          |          |  |  |     |          |          |          |          |  |      |          |          |          |          |          |     |          |          |          |          |          |      |          |          |          |          |          |     |          |          |          |          |          |      |          |          |          |          |          |       |          |          |          |          |          |  |   |   |   |   |    |     |          |  |  |  |  |      |          |          |  |  |  |     |          |          |          |  |  |      |          |          |          |          |  |       |          |          |          |          |          |
| 8 B                                                                                                                             | 3.030576                                                                                                                                                                                                                                                                                                                                                                                                                                                                                                                                                                                                                                                                                                                                                                                                                                                                                                                                                                                                                                                                                                                                                                                                                                                                                                                                                                                                                                                                                                                                                                                                                                                                                                                          | 1.741622 | 0.000000 |          |          |   |   |     |          |  |  |  |  |      |          |          |  |  |  |      |          |          |          |  |  |     |          |          |          |          |  |      |          |          |          |          |          |     |          |          |          |          |          |      |          |          |          |          |          |     |          |          |          |          |          |      |          |          |          |          |          |       |          |          |          |          |          |  |   |   |   |   |    |     |          |  |  |  |  |      |          |          |  |  |  |     |          |          |          |  |  |      |          |          |          |          |  |       |          |          |          |          |          |
| 9 Ru                                                                                                                            | 3.483438                                                                                                                                                                                                                                                                                                                                                                                                                                                                                                                                                                                                                                                                                                                                                                                                                                                                                                                                                                                                                                                                                                                                                                                                                                                                                                                                                                                                                                                                                                                                                                                                                                                                                                                          | 2.005039 | 2.308783 | 0.000000 |          |   |   |     |          |  |  |  |  |      |          |          |  |  |  |      |          |          |          |  |  |     |          |          |          |          |  |      |          |          |          |          |          |     |          |          |          |          |          |      |          |          |          |          |          |     |          |          |          |          |          |      |          |          |          |          |          |       |          |          |          |          |          |  |   |   |   |   |    |     |          |  |  |  |  |      |          |          |  |  |  |     |          |          |          |  |  |      |          |          |          |          |  |       |          |          |          |          |          |
| 10 Ru                                                                                                                           | 2.064834                                                                                                                                                                                                                                                                                                                                                                                                                                                                                                                                                                                                                                                                                                                                                                                                                                                                                                                                                                                                                                                                                                                                                                                                                                                                                                                                                                                                                                                                                                                                                                                                                                                                                                                          | 2.165934 | 3.277970 | 2.802793 | 0.000000 |   |   |     |          |  |  |  |  |      |          |          |  |  |  |      |          |          |          |  |  |     |          |          |          |          |  |      |          |          |          |          |          |     |          |          |          |          |          |      |          |          |          |          |          |     |          |          |          |          |          |      |          |          |          |          |          |       |          |          |          |          |          |  |   |   |   |   |    |     |          |  |  |  |  |      |          |          |  |  |  |     |          |          |          |  |  |      |          |          |          |          |  |       |          |          |          |          |          |
|  <p>11. -780.66831913 +28.5 C<sub>2</sub></p> | <table border="1"> <thead> <tr> <th></th> <th>1</th> <th>2</th> <th>3</th> <th>4</th> <th>5</th> </tr> </thead> <tbody> <tr><td>1 B</td><td>0.000000</td><td></td><td></td><td></td><td></td></tr> <tr><td>2 B</td><td>1.811467</td><td>0.000000</td><td></td><td></td><td></td></tr> <tr><td>3 Ru</td><td>3.086430</td><td>2.275490</td><td>0.000000</td><td></td><td></td></tr> <tr><td>4 B</td><td>1.850618</td><td>2.721343</td><td>2.353190</td><td>0.000000</td><td></td></tr> <tr><td>5 B</td><td>1.789576</td><td>1.786482</td><td>3.361821</td><td>2.860819</td><td>0.000000</td></tr> <tr><td>6 B</td><td>2.860819</td><td>1.759209</td><td>2.223939</td><td>3.044067</td><td>1.850618</td></tr> <tr><td>7 Ru</td><td>3.361821</td><td>3.358841</td><td>2.396652</td><td>2.223939</td><td>3.086430</td></tr> <tr><td>8 B</td><td>1.786482</td><td>2.821250</td><td>3.358841</td><td>1.759209</td><td>1.811467</td></tr> <tr><td>9 B</td><td>2.983015</td><td>2.975712</td><td>3.440647</td><td>3.012100</td><td>1.745895</td></tr> <tr><td>10 B</td><td>1.745895</td><td>1.780880</td><td>2.017858</td><td>1.856973</td><td>2.983015</td></tr> <tr> <td></td> <td>6</td> <td>7</td> <td>8</td> <td>9</td> <td>10</td> </tr> <tr><td>6 B</td><td>0.000000</td><td></td><td></td><td></td><td></td></tr> <tr><td>7 Ru</td><td>2.353190</td><td>0.000000</td><td></td><td></td><td></td></tr> <tr><td>8 B</td><td>2.721343</td><td>2.275490</td><td>0.000000</td><td></td><td></td></tr> <tr><td>9 B</td><td>1.856973</td><td>2.017858</td><td>1.780880</td><td>0.000000</td><td></td></tr> <tr><td>10 B</td><td>3.012100</td><td>3.440647</td><td>2.975712</td><td>3.870931</td><td>0.000000</td></tr> </tbody> </table>  |          | 1        | 2        | 3        | 4 | 5 | 1 B | 0.000000 |  |  |  |  | 2 B  | 1.811467 | 0.000000 |  |  |  | 3 Ru | 3.086430 | 2.275490 | 0.000000 |  |  | 4 B | 1.850618 | 2.721343 | 2.353190 | 0.000000 |  | 5 B  | 1.789576 | 1.786482 | 3.361821 | 2.860819 | 0.000000 | 6 B | 2.860819 | 1.759209 | 2.223939 | 3.044067 | 1.850618 | 7 Ru | 3.361821 | 3.358841 | 2.396652 | 2.223939 | 3.086430 | 8 B | 1.786482 | 2.821250 | 3.358841 | 1.759209 | 1.811467 | 9 B  | 2.983015 | 2.975712 | 3.440647 | 3.012100 | 1.745895 | 10 B  | 1.745895 | 1.780880 | 2.017858 | 1.856973 | 2.983015 |  | 6 | 7 | 8 | 9 | 10 | 6 B | 0.000000 |  |  |  |  | 7 Ru | 2.353190 | 0.000000 |  |  |  | 8 B | 2.721343 | 2.275490 | 0.000000 |  |  | 9 B  | 1.856973 | 2.017858 | 1.780880 | 0.000000 |  | 10 B  | 3.012100 | 3.440647 | 2.975712 | 3.870931 | 0.000000 |
|                                                                                                                                 | 1                                                                                                                                                                                                                                                                                                                                                                                                                                                                                                                                                                                                                                                                                                                                                                                                                                                                                                                                                                                                                                                                                                                                                                                                                                                                                                                                                                                                                                                                                                                                                                                                                                                                                                                                 | 2        | 3        | 4        | 5        |   |   |     |          |  |  |  |  |      |          |          |  |  |  |      |          |          |          |  |  |     |          |          |          |          |  |      |          |          |          |          |          |     |          |          |          |          |          |      |          |          |          |          |          |     |          |          |          |          |          |      |          |          |          |          |          |       |          |          |          |          |          |  |   |   |   |   |    |     |          |  |  |  |  |      |          |          |  |  |  |     |          |          |          |  |  |      |          |          |          |          |  |       |          |          |          |          |          |
| 1 B                                                                                                                             | 0.000000                                                                                                                                                                                                                                                                                                                                                                                                                                                                                                                                                                                                                                                                                                                                                                                                                                                                                                                                                                                                                                                                                                                                                                                                                                                                                                                                                                                                                                                                                                                                                                                                                                                                                                                          |          |          |          |          |   |   |     |          |  |  |  |  |      |          |          |  |  |  |      |          |          |          |  |  |     |          |          |          |          |  |      |          |          |          |          |          |     |          |          |          |          |          |      |          |          |          |          |          |     |          |          |          |          |          |      |          |          |          |          |          |       |          |          |          |          |          |  |   |   |   |   |    |     |          |  |  |  |  |      |          |          |  |  |  |     |          |          |          |  |  |      |          |          |          |          |  |       |          |          |          |          |          |
| 2 B                                                                                                                             | 1.811467                                                                                                                                                                                                                                                                                                                                                                                                                                                                                                                                                                                                                                                                                                                                                                                                                                                                                                                                                                                                                                                                                                                                                                                                                                                                                                                                                                                                                                                                                                                                                                                                                                                                                                                          | 0.000000 |          |          |          |   |   |     |          |  |  |  |  |      |          |          |  |  |  |      |          |          |          |  |  |     |          |          |          |          |  |      |          |          |          |          |          |     |          |          |          |          |          |      |          |          |          |          |          |     |          |          |          |          |          |      |          |          |          |          |          |       |          |          |          |          |          |  |   |   |   |   |    |     |          |  |  |  |  |      |          |          |  |  |  |     |          |          |          |  |  |      |          |          |          |          |  |       |          |          |          |          |          |
| 3 Ru                                                                                                                            | 3.086430                                                                                                                                                                                                                                                                                                                                                                                                                                                                                                                                                                                                                                                                                                                                                                                                                                                                                                                                                                                                                                                                                                                                                                                                                                                                                                                                                                                                                                                                                                                                                                                                                                                                                                                          | 2.275490 | 0.000000 |          |          |   |   |     |          |  |  |  |  |      |          |          |  |  |  |      |          |          |          |  |  |     |          |          |          |          |  |      |          |          |          |          |          |     |          |          |          |          |          |      |          |          |          |          |          |     |          |          |          |          |          |      |          |          |          |          |          |       |          |          |          |          |          |  |   |   |   |   |    |     |          |  |  |  |  |      |          |          |  |  |  |     |          |          |          |  |  |      |          |          |          |          |  |       |          |          |          |          |          |
| 4 B                                                                                                                             | 1.850618                                                                                                                                                                                                                                                                                                                                                                                                                                                                                                                                                                                                                                                                                                                                                                                                                                                                                                                                                                                                                                                                                                                                                                                                                                                                                                                                                                                                                                                                                                                                                                                                                                                                                                                          | 2.721343 | 2.353190 | 0.000000 |          |   |   |     |          |  |  |  |  |      |          |          |  |  |  |      |          |          |          |  |  |     |          |          |          |          |  |      |          |          |          |          |          |     |          |          |          |          |          |      |          |          |          |          |          |     |          |          |          |          |          |      |          |          |          |          |          |       |          |          |          |          |          |  |   |   |   |   |    |     |          |  |  |  |  |      |          |          |  |  |  |     |          |          |          |  |  |      |          |          |          |          |  |       |          |          |          |          |          |
| 5 B                                                                                                                             | 1.789576                                                                                                                                                                                                                                                                                                                                                                                                                                                                                                                                                                                                                                                                                                                                                                                                                                                                                                                                                                                                                                                                                                                                                                                                                                                                                                                                                                                                                                                                                                                                                                                                                                                                                                                          | 1.786482 | 3.361821 | 2.860819 | 0.000000 |   |   |     |          |  |  |  |  |      |          |          |  |  |  |      |          |          |          |  |  |     |          |          |          |          |  |      |          |          |          |          |          |     |          |          |          |          |          |      |          |          |          |          |          |     |          |          |          |          |          |      |          |          |          |          |          |       |          |          |          |          |          |  |   |   |   |   |    |     |          |  |  |  |  |      |          |          |  |  |  |     |          |          |          |  |  |      |          |          |          |          |  |       |          |          |          |          |          |
| 6 B                                                                                                                             | 2.860819                                                                                                                                                                                                                                                                                                                                                                                                                                                                                                                                                                                                                                                                                                                                                                                                                                                                                                                                                                                                                                                                                                                                                                                                                                                                                                                                                                                                                                                                                                                                                                                                                                                                                                                          | 1.759209 | 2.223939 | 3.044067 | 1.850618 |   |   |     |          |  |  |  |  |      |          |          |  |  |  |      |          |          |          |  |  |     |          |          |          |          |  |      |          |          |          |          |          |     |          |          |          |          |          |      |          |          |          |          |          |     |          |          |          |          |          |      |          |          |          |          |          |       |          |          |          |          |          |  |   |   |   |   |    |     |          |  |  |  |  |      |          |          |  |  |  |     |          |          |          |  |  |      |          |          |          |          |  |       |          |          |          |          |          |
| 7 Ru                                                                                                                            | 3.361821                                                                                                                                                                                                                                                                                                                                                                                                                                                                                                                                                                                                                                                                                                                                                                                                                                                                                                                                                                                                                                                                                                                                                                                                                                                                                                                                                                                                                                                                                                                                                                                                                                                                                                                          | 3.358841 | 2.396652 | 2.223939 | 3.086430 |   |   |     |          |  |  |  |  |      |          |          |  |  |  |      |          |          |          |  |  |     |          |          |          |          |  |      |          |          |          |          |          |     |          |          |          |          |          |      |          |          |          |          |          |     |          |          |          |          |          |      |          |          |          |          |          |       |          |          |          |          |          |  |   |   |   |   |    |     |          |  |  |  |  |      |          |          |  |  |  |     |          |          |          |  |  |      |          |          |          |          |  |       |          |          |          |          |          |
| 8 B                                                                                                                             | 1.786482                                                                                                                                                                                                                                                                                                                                                                                                                                                                                                                                                                                                                                                                                                                                                                                                                                                                                                                                                                                                                                                                                                                                                                                                                                                                                                                                                                                                                                                                                                                                                                                                                                                                                                                          | 2.821250 | 3.358841 | 1.759209 | 1.811467 |   |   |     |          |  |  |  |  |      |          |          |  |  |  |      |          |          |          |  |  |     |          |          |          |          |  |      |          |          |          |          |          |     |          |          |          |          |          |      |          |          |          |          |          |     |          |          |          |          |          |      |          |          |          |          |          |       |          |          |          |          |          |  |   |   |   |   |    |     |          |  |  |  |  |      |          |          |  |  |  |     |          |          |          |  |  |      |          |          |          |          |  |       |          |          |          |          |          |
| 9 B                                                                                                                             | 2.983015                                                                                                                                                                                                                                                                                                                                                                                                                                                                                                                                                                                                                                                                                                                                                                                                                                                                                                                                                                                                                                                                                                                                                                                                                                                                                                                                                                                                                                                                                                                                                                                                                                                                                                                          | 2.975712 | 3.440647 | 3.012100 | 1.745895 |   |   |     |          |  |  |  |  |      |          |          |  |  |  |      |          |          |          |  |  |     |          |          |          |          |  |      |          |          |          |          |          |     |          |          |          |          |          |      |          |          |          |          |          |     |          |          |          |          |          |      |          |          |          |          |          |       |          |          |          |          |          |  |   |   |   |   |    |     |          |  |  |  |  |      |          |          |  |  |  |     |          |          |          |  |  |      |          |          |          |          |  |       |          |          |          |          |          |
| 10 B                                                                                                                            | 1.745895                                                                                                                                                                                                                                                                                                                                                                                                                                                                                                                                                                                                                                                                                                                                                                                                                                                                                                                                                                                                                                                                                                                                                                                                                                                                                                                                                                                                                                                                                                                                                                                                                                                                                                                          | 1.780880 | 2.017858 | 1.856973 | 2.983015 |   |   |     |          |  |  |  |  |      |          |          |  |  |  |      |          |          |          |  |  |     |          |          |          |          |  |      |          |          |          |          |          |     |          |          |          |          |          |      |          |          |          |          |          |     |          |          |          |          |          |      |          |          |          |          |          |       |          |          |          |          |          |  |   |   |   |   |    |     |          |  |  |  |  |      |          |          |  |  |  |     |          |          |          |  |  |      |          |          |          |          |  |       |          |          |          |          |          |
|                                                                                                                                 | 6                                                                                                                                                                                                                                                                                                                                                                                                                                                                                                                                                                                                                                                                                                                                                                                                                                                                                                                                                                                                                                                                                                                                                                                                                                                                                                                                                                                                                                                                                                                                                                                                                                                                                                                                 | 7        | 8        | 9        | 10       |   |   |     |          |  |  |  |  |      |          |          |  |  |  |      |          |          |          |  |  |     |          |          |          |          |  |      |          |          |          |          |          |     |          |          |          |          |          |      |          |          |          |          |          |     |          |          |          |          |          |      |          |          |          |          |          |       |          |          |          |          |          |  |   |   |   |   |    |     |          |  |  |  |  |      |          |          |  |  |  |     |          |          |          |  |  |      |          |          |          |          |  |       |          |          |          |          |          |
| 6 B                                                                                                                             | 0.000000                                                                                                                                                                                                                                                                                                                                                                                                                                                                                                                                                                                                                                                                                                                                                                                                                                                                                                                                                                                                                                                                                                                                                                                                                                                                                                                                                                                                                                                                                                                                                                                                                                                                                                                          |          |          |          |          |   |   |     |          |  |  |  |  |      |          |          |  |  |  |      |          |          |          |  |  |     |          |          |          |          |  |      |          |          |          |          |          |     |          |          |          |          |          |      |          |          |          |          |          |     |          |          |          |          |          |      |          |          |          |          |          |       |          |          |          |          |          |  |   |   |   |   |    |     |          |  |  |  |  |      |          |          |  |  |  |     |          |          |          |  |  |      |          |          |          |          |  |       |          |          |          |          |          |
| 7 Ru                                                                                                                            | 2.353190                                                                                                                                                                                                                                                                                                                                                                                                                                                                                                                                                                                                                                                                                                                                                                                                                                                                                                                                                                                                                                                                                                                                                                                                                                                                                                                                                                                                                                                                                                                                                                                                                                                                                                                          | 0.000000 |          |          |          |   |   |     |          |  |  |  |  |      |          |          |  |  |  |      |          |          |          |  |  |     |          |          |          |          |  |      |          |          |          |          |          |     |          |          |          |          |          |      |          |          |          |          |          |     |          |          |          |          |          |      |          |          |          |          |          |       |          |          |          |          |          |  |   |   |   |   |    |     |          |  |  |  |  |      |          |          |  |  |  |     |          |          |          |  |  |      |          |          |          |          |  |       |          |          |          |          |          |
| 8 B                                                                                                                             | 2.721343                                                                                                                                                                                                                                                                                                                                                                                                                                                                                                                                                                                                                                                                                                                                                                                                                                                                                                                                                                                                                                                                                                                                                                                                                                                                                                                                                                                                                                                                                                                                                                                                                                                                                                                          | 2.275490 | 0.000000 |          |          |   |   |     |          |  |  |  |  |      |          |          |  |  |  |      |          |          |          |  |  |     |          |          |          |          |  |      |          |          |          |          |          |     |          |          |          |          |          |      |          |          |          |          |          |     |          |          |          |          |          |      |          |          |          |          |          |       |          |          |          |          |          |  |   |   |   |   |    |     |          |  |  |  |  |      |          |          |  |  |  |     |          |          |          |  |  |      |          |          |          |          |  |       |          |          |          |          |          |
| 9 B                                                                                                                             | 1.856973                                                                                                                                                                                                                                                                                                                                                                                                                                                                                                                                                                                                                                                                                                                                                                                                                                                                                                                                                                                                                                                                                                                                                                                                                                                                                                                                                                                                                                                                                                                                                                                                                                                                                                                          | 2.017858 | 1.780880 | 0.000000 |          |   |   |     |          |  |  |  |  |      |          |          |  |  |  |      |          |          |          |  |  |     |          |          |          |          |  |      |          |          |          |          |          |     |          |          |          |          |          |      |          |          |          |          |          |     |          |          |          |          |          |      |          |          |          |          |          |       |          |          |          |          |          |  |   |   |   |   |    |     |          |  |  |  |  |      |          |          |  |  |  |     |          |          |          |  |  |      |          |          |          |          |  |       |          |          |          |          |          |
| 10 B                                                                                                                            | 3.012100                                                                                                                                                                                                                                                                                                                                                                                                                                                                                                                                                                                                                                                                                                                                                                                                                                                                                                                                                                                                                                                                                                                                                                                                                                                                                                                                                                                                                                                                                                                                                                                                                                                                                                                          | 3.440647 | 2.975712 | 3.870931 | 0.000000 |   |   |     |          |  |  |  |  |      |          |          |  |  |  |      |          |          |          |  |  |     |          |          |          |          |  |      |          |          |          |          |          |     |          |          |          |          |          |      |          |          |          |          |          |     |          |          |          |          |          |      |          |          |          |          |          |       |          |          |          |          |          |  |   |   |   |   |    |     |          |  |  |  |  |      |          |          |  |  |  |     |          |          |          |  |  |      |          |          |          |          |  |       |          |          |          |          |          |
|  <p>12. -780.66719501 +29.2</p>              | <table border="1"> <thead> <tr> <th></th> <th>1</th> <th>2</th> <th>3</th> <th>4</th> <th>5</th> </tr> </thead> <tbody> <tr><td>1 B</td><td>0.000000</td><td></td><td></td><td></td><td></td></tr> <tr><td>2 Ru</td><td>2.198398</td><td>0.000000</td><td></td><td></td><td></td></tr> <tr><td>3 B</td><td>1.802842</td><td>2.265750</td><td>0.000000</td><td></td><td></td></tr> <tr><td>4 B</td><td>1.753294</td><td>2.199141</td><td>2.682340</td><td>0.000000</td><td></td></tr> <tr><td>5 Ru</td><td>3.349254</td><td>3.618656</td><td>2.189953</td><td>3.193929</td><td>0.000000</td></tr> <tr><td>6 B</td><td>2.910966</td><td>2.238682</td><td>2.663686</td><td>1.774118</td><td>2.339322</td></tr> <tr><td>7 B</td><td>3.128610</td><td>2.136412</td><td>1.874802</td><td>2.996585</td><td>2.051906</td></tr> <tr><td>8 B</td><td>1.735895</td><td>3.270870</td><td>1.775048</td><td>2.234694</td><td>2.140790</td></tr> <tr><td>9 B</td><td>1.851532</td><td>2.054788</td><td>1.663911</td><td>3.210552</td><td>3.837298</td></tr> <tr><td>10 B</td><td>2.856699</td><td>3.440842</td><td>2.896974</td><td>1.858961</td><td>2.016354</td></tr> <tr> <td></td> <td>6</td> <td>7</td> <td>8</td> <td>9</td> <td>10</td> </tr> <tr><td>6 B</td><td>0.000000</td><td></td><td></td><td></td><td></td></tr> <tr><td>7 B</td><td>1.823116</td><td>0.000000</td><td></td><td></td><td></td></tr> <tr><td>8 B</td><td>2.798396</td><td>3.032248</td><td>0.000000</td><td></td><td></td></tr> <tr><td>9 B</td><td>3.655577</td><td>2.911928</td><td>2.958631</td><td>0.000000</td><td></td></tr> <tr><td>10 B</td><td>1.741181</td><td>2.946040</td><td>1.922394</td><td>4.177026</td><td>0.000000</td></tr> </tbody> </table>   |          | 1        | 2        | 3        | 4 | 5 | 1 B | 0.000000 |  |  |  |  | 2 Ru | 2.198398 | 0.000000 |  |  |  | 3 B  | 1.802842 | 2.265750 | 0.000000 |  |  | 4 B | 1.753294 | 2.199141 | 2.682340 | 0.000000 |  | 5 Ru | 3.349254 | 3.618656 | 2.189953 | 3.193929 | 0.000000 | 6 B | 2.910966 | 2.238682 | 2.663686 | 1.774118 | 2.339322 | 7 B  | 3.128610 | 2.136412 | 1.874802 | 2.996585 | 2.051906 | 8 B | 1.735895 | 3.270870 | 1.775048 | 2.234694 | 2.140790 | 9 B  | 1.851532 | 2.054788 | 1.663911 | 3.210552 | 3.837298 | 10 B  | 2.856699 | 3.440842 | 2.896974 | 1.858961 | 2.016354 |  | 6 | 7 | 8 | 9 | 10 | 6 B | 0.000000 |  |  |  |  | 7 B  | 1.823116 | 0.000000 |  |  |  | 8 B | 2.798396 | 3.032248 | 0.000000 |  |  | 9 B  | 3.655577 | 2.911928 | 2.958631 | 0.000000 |  | 10 B  | 1.741181 | 2.946040 | 1.922394 | 4.177026 | 0.000000 |
|                                                                                                                                 | 1                                                                                                                                                                                                                                                                                                                                                                                                                                                                                                                                                                                                                                                                                                                                                                                                                                                                                                                                                                                                                                                                                                                                                                                                                                                                                                                                                                                                                                                                                                                                                                                                                                                                                                                                 | 2        | 3        | 4        | 5        |   |   |     |          |  |  |  |  |      |          |          |  |  |  |      |          |          |          |  |  |     |          |          |          |          |  |      |          |          |          |          |          |     |          |          |          |          |          |      |          |          |          |          |          |     |          |          |          |          |          |      |          |          |          |          |          |       |          |          |          |          |          |  |   |   |   |   |    |     |          |  |  |  |  |      |          |          |  |  |  |     |          |          |          |  |  |      |          |          |          |          |  |       |          |          |          |          |          |
| 1 B                                                                                                                             | 0.000000                                                                                                                                                                                                                                                                                                                                                                                                                                                                                                                                                                                                                                                                                                                                                                                                                                                                                                                                                                                                                                                                                                                                                                                                                                                                                                                                                                                                                                                                                                                                                                                                                                                                                                                          |          |          |          |          |   |   |     |          |  |  |  |  |      |          |          |  |  |  |      |          |          |          |  |  |     |          |          |          |          |  |      |          |          |          |          |          |     |          |          |          |          |          |      |          |          |          |          |          |     |          |          |          |          |          |      |          |          |          |          |          |       |          |          |          |          |          |  |   |   |   |   |    |     |          |  |  |  |  |      |          |          |  |  |  |     |          |          |          |  |  |      |          |          |          |          |  |       |          |          |          |          |          |
| 2 Ru                                                                                                                            | 2.198398                                                                                                                                                                                                                                                                                                                                                                                                                                                                                                                                                                                                                                                                                                                                                                                                                                                                                                                                                                                                                                                                                                                                                                                                                                                                                                                                                                                                                                                                                                                                                                                                                                                                                                                          | 0.000000 |          |          |          |   |   |     |          |  |  |  |  |      |          |          |  |  |  |      |          |          |          |  |  |     |          |          |          |          |  |      |          |          |          |          |          |     |          |          |          |          |          |      |          |          |          |          |          |     |          |          |          |          |          |      |          |          |          |          |          |       |          |          |          |          |          |  |   |   |   |   |    |     |          |  |  |  |  |      |          |          |  |  |  |     |          |          |          |  |  |      |          |          |          |          |  |       |          |          |          |          |          |
| 3 B                                                                                                                             | 1.802842                                                                                                                                                                                                                                                                                                                                                                                                                                                                                                                                                                                                                                                                                                                                                                                                                                                                                                                                                                                                                                                                                                                                                                                                                                                                                                                                                                                                                                                                                                                                                                                                                                                                                                                          | 2.265750 | 0.000000 |          |          |   |   |     |          |  |  |  |  |      |          |          |  |  |  |      |          |          |          |  |  |     |          |          |          |          |  |      |          |          |          |          |          |     |          |          |          |          |          |      |          |          |          |          |          |     |          |          |          |          |          |      |          |          |          |          |          |       |          |          |          |          |          |  |   |   |   |   |    |     |          |  |  |  |  |      |          |          |  |  |  |     |          |          |          |  |  |      |          |          |          |          |  |       |          |          |          |          |          |
| 4 B                                                                                                                             | 1.753294                                                                                                                                                                                                                                                                                                                                                                                                                                                                                                                                                                                                                                                                                                                                                                                                                                                                                                                                                                                                                                                                                                                                                                                                                                                                                                                                                                                                                                                                                                                                                                                                                                                                                                                          | 2.199141 | 2.682340 | 0.000000 |          |   |   |     |          |  |  |  |  |      |          |          |  |  |  |      |          |          |          |  |  |     |          |          |          |          |  |      |          |          |          |          |          |     |          |          |          |          |          |      |          |          |          |          |          |     |          |          |          |          |          |      |          |          |          |          |          |       |          |          |          |          |          |  |   |   |   |   |    |     |          |  |  |  |  |      |          |          |  |  |  |     |          |          |          |  |  |      |          |          |          |          |  |       |          |          |          |          |          |
| 5 Ru                                                                                                                            | 3.349254                                                                                                                                                                                                                                                                                                                                                                                                                                                                                                                                                                                                                                                                                                                                                                                                                                                                                                                                                                                                                                                                                                                                                                                                                                                                                                                                                                                                                                                                                                                                                                                                                                                                                                                          | 3.618656 | 2.189953 | 3.193929 | 0.000000 |   |   |     |          |  |  |  |  |      |          |          |  |  |  |      |          |          |          |  |  |     |          |          |          |          |  |      |          |          |          |          |          |     |          |          |          |          |          |      |          |          |          |          |          |     |          |          |          |          |          |      |          |          |          |          |          |       |          |          |          |          |          |  |   |   |   |   |    |     |          |  |  |  |  |      |          |          |  |  |  |     |          |          |          |  |  |      |          |          |          |          |  |       |          |          |          |          |          |
| 6 B                                                                                                                             | 2.910966                                                                                                                                                                                                                                                                                                                                                                                                                                                                                                                                                                                                                                                                                                                                                                                                                                                                                                                                                                                                                                                                                                                                                                                                                                                                                                                                                                                                                                                                                                                                                                                                                                                                                                                          | 2.238682 | 2.663686 | 1.774118 | 2.339322 |   |   |     |          |  |  |  |  |      |          |          |  |  |  |      |          |          |          |  |  |     |          |          |          |          |  |      |          |          |          |          |          |     |          |          |          |          |          |      |          |          |          |          |          |     |          |          |          |          |          |      |          |          |          |          |          |       |          |          |          |          |          |  |   |   |   |   |    |     |          |  |  |  |  |      |          |          |  |  |  |     |          |          |          |  |  |      |          |          |          |          |  |       |          |          |          |          |          |
| 7 B                                                                                                                             | 3.128610                                                                                                                                                                                                                                                                                                                                                                                                                                                                                                                                                                                                                                                                                                                                                                                                                                                                                                                                                                                                                                                                                                                                                                                                                                                                                                                                                                                                                                                                                                                                                                                                                                                                                                                          | 2.136412 | 1.874802 | 2.996585 | 2.051906 |   |   |     |          |  |  |  |  |      |          |          |  |  |  |      |          |          |          |  |  |     |          |          |          |          |  |      |          |          |          |          |          |     |          |          |          |          |          |      |          |          |          |          |          |     |          |          |          |          |          |      |          |          |          |          |          |       |          |          |          |          |          |  |   |   |   |   |    |     |          |  |  |  |  |      |          |          |  |  |  |     |          |          |          |  |  |      |          |          |          |          |  |       |          |          |          |          |          |
| 8 B                                                                                                                             | 1.735895                                                                                                                                                                                                                                                                                                                                                                                                                                                                                                                                                                                                                                                                                                                                                                                                                                                                                                                                                                                                                                                                                                                                                                                                                                                                                                                                                                                                                                                                                                                                                                                                                                                                                                                          | 3.270870 | 1.775048 | 2.234694 | 2.140790 |   |   |     |          |  |  |  |  |      |          |          |  |  |  |      |          |          |          |  |  |     |          |          |          |          |  |      |          |          |          |          |          |     |          |          |          |          |          |      |          |          |          |          |          |     |          |          |          |          |          |      |          |          |          |          |          |       |          |          |          |          |          |  |   |   |   |   |    |     |          |  |  |  |  |      |          |          |  |  |  |     |          |          |          |  |  |      |          |          |          |          |  |       |          |          |          |          |          |
| 9 B                                                                                                                             | 1.851532                                                                                                                                                                                                                                                                                                                                                                                                                                                                                                                                                                                                                                                                                                                                                                                                                                                                                                                                                                                                                                                                                                                                                                                                                                                                                                                                                                                                                                                                                                                                                                                                                                                                                                                          | 2.054788 | 1.663911 | 3.210552 | 3.837298 |   |   |     |          |  |  |  |  |      |          |          |  |  |  |      |          |          |          |  |  |     |          |          |          |          |  |      |          |          |          |          |          |     |          |          |          |          |          |      |          |          |          |          |          |     |          |          |          |          |          |      |          |          |          |          |          |       |          |          |          |          |          |  |   |   |   |   |    |     |          |  |  |  |  |      |          |          |  |  |  |     |          |          |          |  |  |      |          |          |          |          |  |       |          |          |          |          |          |
| 10 B                                                                                                                            | 2.856699                                                                                                                                                                                                                                                                                                                                                                                                                                                                                                                                                                                                                                                                                                                                                                                                                                                                                                                                                                                                                                                                                                                                                                                                                                                                                                                                                                                                                                                                                                                                                                                                                                                                                                                          | 3.440842 | 2.896974 | 1.858961 | 2.016354 |   |   |     |          |  |  |  |  |      |          |          |  |  |  |      |          |          |          |  |  |     |          |          |          |          |  |      |          |          |          |          |          |     |          |          |          |          |          |      |          |          |          |          |          |     |          |          |          |          |          |      |          |          |          |          |          |       |          |          |          |          |          |  |   |   |   |   |    |     |          |  |  |  |  |      |          |          |  |  |  |     |          |          |          |  |  |      |          |          |          |          |  |       |          |          |          |          |          |
|                                                                                                                                 | 6                                                                                                                                                                                                                                                                                                                                                                                                                                                                                                                                                                                                                                                                                                                                                                                                                                                                                                                                                                                                                                                                                                                                                                                                                                                                                                                                                                                                                                                                                                                                                                                                                                                                                                                                 | 7        | 8        | 9        | 10       |   |   |     |          |  |  |  |  |      |          |          |  |  |  |      |          |          |          |  |  |     |          |          |          |          |  |      |          |          |          |          |          |     |          |          |          |          |          |      |          |          |          |          |          |     |          |          |          |          |          |      |          |          |          |          |          |       |          |          |          |          |          |  |   |   |   |   |    |     |          |  |  |  |  |      |          |          |  |  |  |     |          |          |          |  |  |      |          |          |          |          |  |       |          |          |          |          |          |
| 6 B                                                                                                                             | 0.000000                                                                                                                                                                                                                                                                                                                                                                                                                                                                                                                                                                                                                                                                                                                                                                                                                                                                                                                                                                                                                                                                                                                                                                                                                                                                                                                                                                                                                                                                                                                                                                                                                                                                                                                          |          |          |          |          |   |   |     |          |  |  |  |  |      |          |          |  |  |  |      |          |          |          |  |  |     |          |          |          |          |  |      |          |          |          |          |          |     |          |          |          |          |          |      |          |          |          |          |          |     |          |          |          |          |          |      |          |          |          |          |          |       |          |          |          |          |          |  |   |   |   |   |    |     |          |  |  |  |  |      |          |          |  |  |  |     |          |          |          |  |  |      |          |          |          |          |  |       |          |          |          |          |          |
| 7 B                                                                                                                             | 1.823116                                                                                                                                                                                                                                                                                                                                                                                                                                                                                                                                                                                                                                                                                                                                                                                                                                                                                                                                                                                                                                                                                                                                                                                                                                                                                                                                                                                                                                                                                                                                                                                                                                                                                                                          | 0.000000 |          |          |          |   |   |     |          |  |  |  |  |      |          |          |  |  |  |      |          |          |          |  |  |     |          |          |          |          |  |      |          |          |          |          |          |     |          |          |          |          |          |      |          |          |          |          |          |     |          |          |          |          |          |      |          |          |          |          |          |       |          |          |          |          |          |  |   |   |   |   |    |     |          |  |  |  |  |      |          |          |  |  |  |     |          |          |          |  |  |      |          |          |          |          |  |       |          |          |          |          |          |
| 8 B                                                                                                                             | 2.798396                                                                                                                                                                                                                                                                                                                                                                                                                                                                                                                                                                                                                                                                                                                                                                                                                                                                                                                                                                                                                                                                                                                                                                                                                                                                                                                                                                                                                                                                                                                                                                                                                                                                                                                          | 3.032248 | 0.000000 |          |          |   |   |     |          |  |  |  |  |      |          |          |  |  |  |      |          |          |          |  |  |     |          |          |          |          |  |      |          |          |          |          |          |     |          |          |          |          |          |      |          |          |          |          |          |     |          |          |          |          |          |      |          |          |          |          |          |       |          |          |          |          |          |  |   |   |   |   |    |     |          |  |  |  |  |      |          |          |  |  |  |     |          |          |          |  |  |      |          |          |          |          |  |       |          |          |          |          |          |
| 9 B                                                                                                                             | 3.655577                                                                                                                                                                                                                                                                                                                                                                                                                                                                                                                                                                                                                                                                                                                                                                                                                                                                                                                                                                                                                                                                                                                                                                                                                                                                                                                                                                                                                                                                                                                                                                                                                                                                                                                          | 2.911928 | 2.958631 | 0.000000 |          |   |   |     |          |  |  |  |  |      |          |          |  |  |  |      |          |          |          |  |  |     |          |          |          |          |  |      |          |          |          |          |          |     |          |          |          |          |          |      |          |          |          |          |          |     |          |          |          |          |          |      |          |          |          |          |          |       |          |          |          |          |          |  |   |   |   |   |    |     |          |  |  |  |  |      |          |          |  |  |  |     |          |          |          |  |  |      |          |          |          |          |  |       |          |          |          |          |          |
| 10 B                                                                                                                            | 1.741181                                                                                                                                                                                                                                                                                                                                                                                                                                                                                                                                                                                                                                                                                                                                                                                                                                                                                                                                                                                                                                                                                                                                                                                                                                                                                                                                                                                                                                                                                                                                                                                                                                                                                                                          | 2.946040 | 1.922394 | 4.177026 | 0.000000 |   |   |     |          |  |  |  |  |      |          |          |  |  |  |      |          |          |          |  |  |     |          |          |          |          |  |      |          |          |          |          |          |     |          |          |          |          |          |      |          |          |          |          |          |     |          |          |          |          |          |      |          |          |          |          |          |       |          |          |          |          |          |  |   |   |   |   |    |     |          |  |  |  |  |      |          |          |  |  |  |     |          |          |          |  |  |      |          |          |          |          |  |       |          |          |          |          |          |

Table S3C Energy ranking of the  $\text{Cp}_2\text{Ru}_2\text{B}_8\text{H}_8$  structures

| No | Initial structure               | Final energy (a.u.) | $\Delta E$<br>kcal/mole |
|----|---------------------------------|---------------------|-------------------------|
| 1  | 10-Ru-1-TetrTriPri1-e           | -780.71376957       | 0.00                    |
| 2  | 10-Ru-2-TetrTriPri2_c           | -780.71376957       | 0.00                    |
| 3  | 10-Ru-2-TetrTriPri2_d           | -780.71376957       | 0.00                    |
| 4  | 10-Ru-7-Isocloso-i              | -780.71376956       | 0.00                    |
| 5  | 10-Ru-1-TetrTriPri1-i           | -780.70044535       | 8.36                    |
| 6  | 10-Ru-5-PentagPrism-b           | -780.69577525       | 11.29                   |
| 7  | 10-Ru-2-TetrTriPri2_f           | -780.68713236       | 16.71                   |
| 8  | 10-Ru-1-TetrTriPri1-l           | -780.68713235       | 16.71                   |
| 9  | 10-Ru-7-Isocloso-c              | -780.68713235       | 16.71                   |
| 10 | 10-Ru-structure-2               | -780.68713235       | 16.71                   |
| 11 | 10-Ru-3-BicapCub_g              | -780.68027389       | 21.02                   |
| 12 | 10-Ru-3-BicapCub_b              | -780.67970267       | 21.38                   |
| 13 | 10-Ru-6-AntiPr-d                | -780.67970267       | 21.38                   |
| 14 | 10-Ru-7-Isocloso-k              | -780.67258719       | 25.84                   |
| 15 | 10-Ru-2-TetrTriPri2_h           | -780.67258707       | 25.84                   |
| 16 | 10-Ru-7-Isocloso-b              | -780.67256369       | 25.86                   |
| 17 | 10-Ru-2-TetrTriPri2_e           | -780.67142058       | 26.57                   |
| 18 | 10-Ru-5-PentagPrism-a           | -780.66957763       | 27.73                   |
| 19 | 10-Ru-4-BicapSqAntipr-f         | -780.66831913       | 28.52                   |
| 20 | 10-Ru-7-Isocloso-j              | -780.66828079       | 28.54                   |
| 21 | 10-Ru-7-Isocloso-l_r-18         | -780.66828079       | 28.54                   |
| 22 | 10-Ru-7-Isocloso-l_r-189        | -780.66828078       | 28.54                   |
| 23 | 10-Ru-1-TetrTriPri1-j           | -780.66719501       | 29.23                   |
| 24 | 10-Ru-6-AntiPr-e                | -780.66719496       | 29.23                   |
| 25 | 10-Ru-1-TetrTriPri1-h           | -780.66615832       | 29.88                   |
| 26 | 10-Ru-1-TetrTriPri1-o           | -780.66278476       | 31.99                   |
| 27 | 10-Ru-5-PentagPrism-c           | -780.66278475       | 31.99                   |
| 28 | 10-Ru-1-TetrTriPri1-f           | -780.66083248       | 33.22                   |
| 29 | 10-Ru-5-PentagPrism-e           | -780.66059464       | 33.37                   |
| 30 | 10-Ru-1-TetrTriPri1-g           | -780.66016175       | 33.64                   |
| 31 | 10-Ru-1-TetrTriPri1-n           | -780.65926036       | 34.20                   |
| 32 | 10-Ru-2-TetrTriPri2_g_r-20      | -780.65898373       | 34.38                   |
| 33 | 10-Ru-2-TetrTriPri2_g_r-152     | -780.65898372       | 34.38                   |
| 34 | 10-Ru-2-TetrTriPri2_g_i-152-20  | -780.65769755       | 35.19                   |
| 35 | 10-Ru-3-BicapCub_h              | -780.65515020       | 36.78                   |
| 36 | 10-Ru-4-BicapSqAntipr-e_r-98-17 | -780.65352165       | 37.81                   |
| 37 | 10-Ru-4-BicapSqAntipr-e_r-98    | -780.65286149       | 38.22                   |
| 38 | 10-Ru-6-AntiPr-c                | -780.64987845       | 40.09                   |
| 39 | 10-Ru-3-BicapCub_e              | -780.64987782       | 40.09                   |
| 40 | 10-Ru-1-TetrTriPri1-c           | -780.64708309       | 41.85                   |

|    |                              |               |        |
|----|------------------------------|---------------|--------|
| 41 | 10-Ru-6-AntiPr-b             | -780.64509424 | 43.09  |
| 42 | 10-Ru-1-TetrTriPri1-d        | -780.64413085 | 43.70  |
| 43 | 10-Ru-2-TetrTriPri2_a        | -780.64256418 | 44.68  |
| 44 | 10-Ru-7-Isocloso-a           | -780.64256418 | 44.68  |
| 45 | 10-Ru-5-PentagPrism-d        | -780.64252186 | 44.71  |
| 46 | 10-Ru-4-BicapSqAntipr-g      | -780.64102700 | 45.65  |
| 47 | 10-Ru-7-Isocloso-h           | -780.64102697 | 45.65  |
| 48 | 10-Ru-1-TetrTriPri1-b        | -780.64021436 | 46.16  |
| 49 | 10-Ru-1-TetrTriPri1-p        | -780.64010083 | 46.23  |
| 50 | 10-Ru-4-BicapSqAntipr-b      | -780.63822484 | 47.40  |
| 51 | 10-Ru-7-Isocloso-f           | -780.63815645 | 47.45  |
| 52 | 10-Ru-1-TetrTriPri1-m        | -780.63375820 | 50.21  |
| 53 | 10-Ru-7-Isocloso-g           | -780.63371452 | 50.23  |
| 54 | 10-Ru-4-BicapSqAntipr-d      | -780.63371451 | 50.23  |
| 55 | 10-Ru-4-BicapSqAntipr-a      | -780.63299180 | 50.69  |
| 56 | 10-Ru-7-Isocloso-e           | -780.63299180 | 50.69  |
| 57 | 10-Ru-1-TetrTriPri1-k        | -780.62308168 | 56.91  |
| 58 | 10-Ru-7-Isocloso-d           | -780.62200365 | 57.58  |
| 59 | 10-Ru-4-BicapSqAntipr-e_r-57 | -780.62200364 | 57.58  |
| 60 | 10-Ru-7-Isocloso-l imag      | -780.62160644 | 57.83  |
| 61 | 10-Ru-4-BicapSqAntipr-e imag | -780.62160206 | 57.84  |
| 62 | 10-Ru-2-TetrTriPri2_i_r-116  | -780.61890797 | 59.53  |
| 63 | 10-Ru-2-TetrTriPri2_i_i-116  | -780.61678901 | 60.86  |
| 64 | 10-Ru-3-BicapCub_d           | -780.60999390 | 65.12  |
| 65 | 10-Ru-6-AntiPr-a             | -780.60990119 | 65.18  |
| 66 | 10-Ru-3-BicapCub_a           | -780.59182375 | 76.52  |
| 67 | 10-Ru-3-BicapCub_f           | -780.59034043 | 77.45  |
| 68 | 10-Ru-1-TetrTriPri1-a        | -780.58797781 | 78.93  |
| 69 | 10-Ru-3-BicapCub_c           | -780.56571140 | 92.91  |
| 70 | 10-Ru-4-BicapSqAntipr-c      | -780.56089687 | 95.93  |
| 71 | 10-Ru-Bipypr-octag           | -780.54853452 | 103.68 |



## The 11-vertex $\text{Cp}_2\text{Ru}_2\text{B}_9\text{H}_9$ Structures

Table S4A. Initial structures

Table S4B. Distances in the lowest energy structures.

Table S4C. Global ranking of all structures

Table S4A. Initial  $\text{Cp}_2\text{Re}_2\text{B}_9\text{H}_9$  structures (one example from each family) 89 structures in total

|                                                                                                                                                                                  |                                                                                                                                                                                                     |
|----------------------------------------------------------------------------------------------------------------------------------------------------------------------------------|-----------------------------------------------------------------------------------------------------------------------------------------------------------------------------------------------------|
| <p style="text-align: center;"><b>Initial structures</b></p>                                                                                                                     | 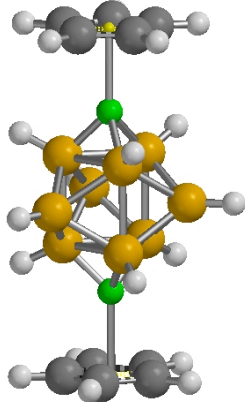 <p style="text-align: center;">1. Pentacapped trigonal prism 11 structures</p>                                  |
|  <p style="text-align: center;">2a. Tricapped cubeA (<math>C_{2v}</math>) 18 structures</p>     |  <p style="text-align: center;">2b. Tricapped cubeA (<math>C_{3v}</math>) 16 structures</p>                       |
|  <p style="text-align: center;">3. Octahedron fused to pentagonal bipyramid 24 structures</p> |  <p style="text-align: center;">4. Edge-coalesced icosahedrons (icosahedron without a vertex) 20 structures</p> |

Table S4B Distance table for the lowest energy  $Cp_2Ru_2B_9H_9$  structures

| 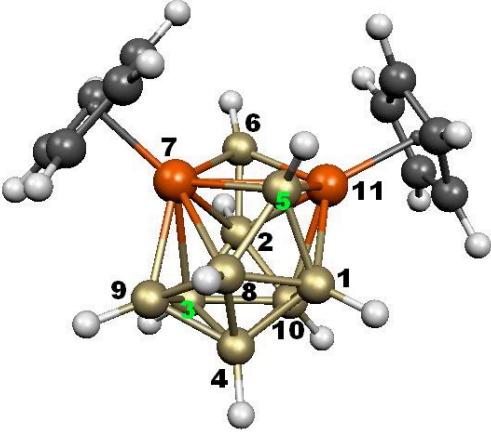 <p>1. -806.18577798 0.0</p>     | <table border="1"> <thead> <tr> <th></th> <th>1</th> <th>2</th> <th>3</th> <th>4</th> <th>5</th> </tr> </thead> <tbody> <tr><td>1 B</td><td>0.000000</td><td></td><td></td><td></td><td></td></tr> <tr><td>2 B</td><td>2.879232</td><td>0.000000</td><td></td><td></td><td></td></tr> <tr><td>3 B</td><td>2.904612</td><td>1.667209</td><td>0.000000</td><td></td><td></td></tr> <tr><td>4 B</td><td>1.801954</td><td>2.825829</td><td>1.819653</td><td>0.000000</td><td></td></tr> <tr><td>5 B</td><td>1.812285</td><td>3.094118</td><td>3.465630</td><td>2.981294</td><td>0.000000</td></tr> <tr><td>6 B</td><td>3.774689</td><td>1.621804</td><td>3.099274</td><td>4.183330</td><td>3.225677</td></tr> <tr><td>7 Ru</td><td>3.124955</td><td>2.238792</td><td>2.429385</td><td>3.120504</td><td>2.221184</td></tr> <tr><td>8 B</td><td>1.775871</td><td>3.302953</td><td>2.767569</td><td>1.801049</td><td>1.740453</td></tr> <tr><td>9 B</td><td>2.882319</td><td>2.942458</td><td>1.729133</td><td>1.725402</td><td>3.034798</td></tr> <tr><td>10 B</td><td>1.796572</td><td>1.724790</td><td>1.896858</td><td>1.817258</td><td>3.012434</td></tr> <tr><td>11 Ru</td><td>2.250886</td><td>2.110714</td><td>3.344389</td><td>3.455689</td><td>2.088379</td></tr> <tr> <td></td> <td>6</td> <td>7</td> <td>8</td> <td>9</td> <td>10</td> </tr> <tr><td>6 B</td><td>0.000000</td><td></td><td></td><td></td><td></td></tr> <tr><td>7 Ru</td><td>2.258152</td><td>0.000000</td><td></td><td></td><td></td></tr> <tr><td>8 B</td><td>4.056614</td><td>2.382126</td><td>0.000000</td><td></td><td></td></tr> <tr><td>9 B</td><td>3.950243</td><td>2.181681</td><td>1.713598</td><td>0.000000</td><td></td></tr> <tr><td>10 B</td><td>3.128218</td><td>3.188551</td><td>2.871527</td><td>2.941475</td><td>0.000000</td></tr> <tr><td>11 Ru</td><td>2.093811</td><td>2.825805</td><td>3.263641</td><td>3.941333</td><td>2.266609</td></tr> </tbody> </table> |          | 1        | 2        | 3        | 4 | 5 | 1 B  | 0.000000 |  |  |  |  | 2 B | 2.879232 | 0.000000 |  |  |  | 3 B | 2.904612 | 1.667209 | 0.000000 |  |  | 4 B | 1.801954 | 2.825829 | 1.819653 | 0.000000 |  | 5 B  | 1.812285 | 3.094118 | 3.465630 | 2.981294 | 0.000000 | 6 B  | 3.774689 | 1.621804 | 3.099274 | 4.183330 | 3.225677 | 7 Ru | 3.124955 | 2.238792 | 2.429385 | 3.120504 | 2.221184 | 8 B | 1.775871 | 3.302953 | 2.767569 | 1.801049 | 1.740453 | 9 B | 2.882319 | 2.942458 | 1.729133 | 1.725402 | 3.034798 | 10 B  | 1.796572 | 1.724790 | 1.896858 | 1.817258 | 3.012434 | 11 Ru | 2.250886 | 2.110714 | 3.344389 | 3.455689 | 2.088379 |  | 6 | 7 | 8 | 9 | 10 | 6 B  | 0.000000 |  |  |  |  | 7 Ru | 2.258152 | 0.000000 |  |  |  | 8 B | 4.056614 | 2.382126 | 0.000000 |  |  | 9 B | 3.950243 | 2.181681 | 1.713598 | 0.000000 |  | 10 B  | 3.128218 | 3.188551 | 2.871527 | 2.941475 | 0.000000 | 11 Ru | 2.093811 | 2.825805 | 3.263641 | 3.941333 | 2.266609 |
|-------------------------------------------------------------------------------------------------------------------|-----------------------------------------------------------------------------------------------------------------------------------------------------------------------------------------------------------------------------------------------------------------------------------------------------------------------------------------------------------------------------------------------------------------------------------------------------------------------------------------------------------------------------------------------------------------------------------------------------------------------------------------------------------------------------------------------------------------------------------------------------------------------------------------------------------------------------------------------------------------------------------------------------------------------------------------------------------------------------------------------------------------------------------------------------------------------------------------------------------------------------------------------------------------------------------------------------------------------------------------------------------------------------------------------------------------------------------------------------------------------------------------------------------------------------------------------------------------------------------------------------------------------------------------------------------------------------------------------------------------------------------------------------------------------------------------------------------------------------------------------------------------------------------------------------------------------------------------------------------------------------------------------------------------------------------------------------------|----------|----------|----------|----------|---|---|------|----------|--|--|--|--|-----|----------|----------|--|--|--|-----|----------|----------|----------|--|--|-----|----------|----------|----------|----------|--|------|----------|----------|----------|----------|----------|------|----------|----------|----------|----------|----------|------|----------|----------|----------|----------|----------|-----|----------|----------|----------|----------|----------|-----|----------|----------|----------|----------|----------|-------|----------|----------|----------|----------|----------|-------|----------|----------|----------|----------|----------|--|---|---|---|---|----|------|----------|--|--|--|--|------|----------|----------|--|--|--|-----|----------|----------|----------|--|--|-----|----------|----------|----------|----------|--|-------|----------|----------|----------|----------|----------|-------|----------|----------|----------|----------|----------|
|                                                                                                                   | 1                                                                                                                                                                                                                                                                                                                                                                                                                                                                                                                                                                                                                                                                                                                                                                                                                                                                                                                                                                                                                                                                                                                                                                                                                                                                                                                                                                                                                                                                                                                                                                                                                                                                                                                                                                                                                                                                                                                                                         | 2        | 3        | 4        | 5        |   |   |      |          |  |  |  |  |     |          |          |  |  |  |     |          |          |          |  |  |     |          |          |          |          |  |      |          |          |          |          |          |      |          |          |          |          |          |      |          |          |          |          |          |     |          |          |          |          |          |     |          |          |          |          |          |       |          |          |          |          |          |       |          |          |          |          |          |  |   |   |   |   |    |      |          |  |  |  |  |      |          |          |  |  |  |     |          |          |          |  |  |     |          |          |          |          |  |       |          |          |          |          |          |       |          |          |          |          |          |
| 1 B                                                                                                               | 0.000000                                                                                                                                                                                                                                                                                                                                                                                                                                                                                                                                                                                                                                                                                                                                                                                                                                                                                                                                                                                                                                                                                                                                                                                                                                                                                                                                                                                                                                                                                                                                                                                                                                                                                                                                                                                                                                                                                                                                                  |          |          |          |          |   |   |      |          |  |  |  |  |     |          |          |  |  |  |     |          |          |          |  |  |     |          |          |          |          |  |      |          |          |          |          |          |      |          |          |          |          |          |      |          |          |          |          |          |     |          |          |          |          |          |     |          |          |          |          |          |       |          |          |          |          |          |       |          |          |          |          |          |  |   |   |   |   |    |      |          |  |  |  |  |      |          |          |  |  |  |     |          |          |          |  |  |     |          |          |          |          |  |       |          |          |          |          |          |       |          |          |          |          |          |
| 2 B                                                                                                               | 2.879232                                                                                                                                                                                                                                                                                                                                                                                                                                                                                                                                                                                                                                                                                                                                                                                                                                                                                                                                                                                                                                                                                                                                                                                                                                                                                                                                                                                                                                                                                                                                                                                                                                                                                                                                                                                                                                                                                                                                                  | 0.000000 |          |          |          |   |   |      |          |  |  |  |  |     |          |          |  |  |  |     |          |          |          |  |  |     |          |          |          |          |  |      |          |          |          |          |          |      |          |          |          |          |          |      |          |          |          |          |          |     |          |          |          |          |          |     |          |          |          |          |          |       |          |          |          |          |          |       |          |          |          |          |          |  |   |   |   |   |    |      |          |  |  |  |  |      |          |          |  |  |  |     |          |          |          |  |  |     |          |          |          |          |  |       |          |          |          |          |          |       |          |          |          |          |          |
| 3 B                                                                                                               | 2.904612                                                                                                                                                                                                                                                                                                                                                                                                                                                                                                                                                                                                                                                                                                                                                                                                                                                                                                                                                                                                                                                                                                                                                                                                                                                                                                                                                                                                                                                                                                                                                                                                                                                                                                                                                                                                                                                                                                                                                  | 1.667209 | 0.000000 |          |          |   |   |      |          |  |  |  |  |     |          |          |  |  |  |     |          |          |          |  |  |     |          |          |          |          |  |      |          |          |          |          |          |      |          |          |          |          |          |      |          |          |          |          |          |     |          |          |          |          |          |     |          |          |          |          |          |       |          |          |          |          |          |       |          |          |          |          |          |  |   |   |   |   |    |      |          |  |  |  |  |      |          |          |  |  |  |     |          |          |          |  |  |     |          |          |          |          |  |       |          |          |          |          |          |       |          |          |          |          |          |
| 4 B                                                                                                               | 1.801954                                                                                                                                                                                                                                                                                                                                                                                                                                                                                                                                                                                                                                                                                                                                                                                                                                                                                                                                                                                                                                                                                                                                                                                                                                                                                                                                                                                                                                                                                                                                                                                                                                                                                                                                                                                                                                                                                                                                                  | 2.825829 | 1.819653 | 0.000000 |          |   |   |      |          |  |  |  |  |     |          |          |  |  |  |     |          |          |          |  |  |     |          |          |          |          |  |      |          |          |          |          |          |      |          |          |          |          |          |      |          |          |          |          |          |     |          |          |          |          |          |     |          |          |          |          |          |       |          |          |          |          |          |       |          |          |          |          |          |  |   |   |   |   |    |      |          |  |  |  |  |      |          |          |  |  |  |     |          |          |          |  |  |     |          |          |          |          |  |       |          |          |          |          |          |       |          |          |          |          |          |
| 5 B                                                                                                               | 1.812285                                                                                                                                                                                                                                                                                                                                                                                                                                                                                                                                                                                                                                                                                                                                                                                                                                                                                                                                                                                                                                                                                                                                                                                                                                                                                                                                                                                                                                                                                                                                                                                                                                                                                                                                                                                                                                                                                                                                                  | 3.094118 | 3.465630 | 2.981294 | 0.000000 |   |   |      |          |  |  |  |  |     |          |          |  |  |  |     |          |          |          |  |  |     |          |          |          |          |  |      |          |          |          |          |          |      |          |          |          |          |          |      |          |          |          |          |          |     |          |          |          |          |          |     |          |          |          |          |          |       |          |          |          |          |          |       |          |          |          |          |          |  |   |   |   |   |    |      |          |  |  |  |  |      |          |          |  |  |  |     |          |          |          |  |  |     |          |          |          |          |  |       |          |          |          |          |          |       |          |          |          |          |          |
| 6 B                                                                                                               | 3.774689                                                                                                                                                                                                                                                                                                                                                                                                                                                                                                                                                                                                                                                                                                                                                                                                                                                                                                                                                                                                                                                                                                                                                                                                                                                                                                                                                                                                                                                                                                                                                                                                                                                                                                                                                                                                                                                                                                                                                  | 1.621804 | 3.099274 | 4.183330 | 3.225677 |   |   |      |          |  |  |  |  |     |          |          |  |  |  |     |          |          |          |  |  |     |          |          |          |          |  |      |          |          |          |          |          |      |          |          |          |          |          |      |          |          |          |          |          |     |          |          |          |          |          |     |          |          |          |          |          |       |          |          |          |          |          |       |          |          |          |          |          |  |   |   |   |   |    |      |          |  |  |  |  |      |          |          |  |  |  |     |          |          |          |  |  |     |          |          |          |          |  |       |          |          |          |          |          |       |          |          |          |          |          |
| 7 Ru                                                                                                              | 3.124955                                                                                                                                                                                                                                                                                                                                                                                                                                                                                                                                                                                                                                                                                                                                                                                                                                                                                                                                                                                                                                                                                                                                                                                                                                                                                                                                                                                                                                                                                                                                                                                                                                                                                                                                                                                                                                                                                                                                                  | 2.238792 | 2.429385 | 3.120504 | 2.221184 |   |   |      |          |  |  |  |  |     |          |          |  |  |  |     |          |          |          |  |  |     |          |          |          |          |  |      |          |          |          |          |          |      |          |          |          |          |          |      |          |          |          |          |          |     |          |          |          |          |          |     |          |          |          |          |          |       |          |          |          |          |          |       |          |          |          |          |          |  |   |   |   |   |    |      |          |  |  |  |  |      |          |          |  |  |  |     |          |          |          |  |  |     |          |          |          |          |  |       |          |          |          |          |          |       |          |          |          |          |          |
| 8 B                                                                                                               | 1.775871                                                                                                                                                                                                                                                                                                                                                                                                                                                                                                                                                                                                                                                                                                                                                                                                                                                                                                                                                                                                                                                                                                                                                                                                                                                                                                                                                                                                                                                                                                                                                                                                                                                                                                                                                                                                                                                                                                                                                  | 3.302953 | 2.767569 | 1.801049 | 1.740453 |   |   |      |          |  |  |  |  |     |          |          |  |  |  |     |          |          |          |  |  |     |          |          |          |          |  |      |          |          |          |          |          |      |          |          |          |          |          |      |          |          |          |          |          |     |          |          |          |          |          |     |          |          |          |          |          |       |          |          |          |          |          |       |          |          |          |          |          |  |   |   |   |   |    |      |          |  |  |  |  |      |          |          |  |  |  |     |          |          |          |  |  |     |          |          |          |          |  |       |          |          |          |          |          |       |          |          |          |          |          |
| 9 B                                                                                                               | 2.882319                                                                                                                                                                                                                                                                                                                                                                                                                                                                                                                                                                                                                                                                                                                                                                                                                                                                                                                                                                                                                                                                                                                                                                                                                                                                                                                                                                                                                                                                                                                                                                                                                                                                                                                                                                                                                                                                                                                                                  | 2.942458 | 1.729133 | 1.725402 | 3.034798 |   |   |      |          |  |  |  |  |     |          |          |  |  |  |     |          |          |          |  |  |     |          |          |          |          |  |      |          |          |          |          |          |      |          |          |          |          |          |      |          |          |          |          |          |     |          |          |          |          |          |     |          |          |          |          |          |       |          |          |          |          |          |       |          |          |          |          |          |  |   |   |   |   |    |      |          |  |  |  |  |      |          |          |  |  |  |     |          |          |          |  |  |     |          |          |          |          |  |       |          |          |          |          |          |       |          |          |          |          |          |
| 10 B                                                                                                              | 1.796572                                                                                                                                                                                                                                                                                                                                                                                                                                                                                                                                                                                                                                                                                                                                                                                                                                                                                                                                                                                                                                                                                                                                                                                                                                                                                                                                                                                                                                                                                                                                                                                                                                                                                                                                                                                                                                                                                                                                                  | 1.724790 | 1.896858 | 1.817258 | 3.012434 |   |   |      |          |  |  |  |  |     |          |          |  |  |  |     |          |          |          |  |  |     |          |          |          |          |  |      |          |          |          |          |          |      |          |          |          |          |          |      |          |          |          |          |          |     |          |          |          |          |          |     |          |          |          |          |          |       |          |          |          |          |          |       |          |          |          |          |          |  |   |   |   |   |    |      |          |  |  |  |  |      |          |          |  |  |  |     |          |          |          |  |  |     |          |          |          |          |  |       |          |          |          |          |          |       |          |          |          |          |          |
| 11 Ru                                                                                                             | 2.250886                                                                                                                                                                                                                                                                                                                                                                                                                                                                                                                                                                                                                                                                                                                                                                                                                                                                                                                                                                                                                                                                                                                                                                                                                                                                                                                                                                                                                                                                                                                                                                                                                                                                                                                                                                                                                                                                                                                                                  | 2.110714 | 3.344389 | 3.455689 | 2.088379 |   |   |      |          |  |  |  |  |     |          |          |  |  |  |     |          |          |          |  |  |     |          |          |          |          |  |      |          |          |          |          |          |      |          |          |          |          |          |      |          |          |          |          |          |     |          |          |          |          |          |     |          |          |          |          |          |       |          |          |          |          |          |       |          |          |          |          |          |  |   |   |   |   |    |      |          |  |  |  |  |      |          |          |  |  |  |     |          |          |          |  |  |     |          |          |          |          |  |       |          |          |          |          |          |       |          |          |          |          |          |
|                                                                                                                   | 6                                                                                                                                                                                                                                                                                                                                                                                                                                                                                                                                                                                                                                                                                                                                                                                                                                                                                                                                                                                                                                                                                                                                                                                                                                                                                                                                                                                                                                                                                                                                                                                                                                                                                                                                                                                                                                                                                                                                                         | 7        | 8        | 9        | 10       |   |   |      |          |  |  |  |  |     |          |          |  |  |  |     |          |          |          |  |  |     |          |          |          |          |  |      |          |          |          |          |          |      |          |          |          |          |          |      |          |          |          |          |          |     |          |          |          |          |          |     |          |          |          |          |          |       |          |          |          |          |          |       |          |          |          |          |          |  |   |   |   |   |    |      |          |  |  |  |  |      |          |          |  |  |  |     |          |          |          |  |  |     |          |          |          |          |  |       |          |          |          |          |          |       |          |          |          |          |          |
| 6 B                                                                                                               | 0.000000                                                                                                                                                                                                                                                                                                                                                                                                                                                                                                                                                                                                                                                                                                                                                                                                                                                                                                                                                                                                                                                                                                                                                                                                                                                                                                                                                                                                                                                                                                                                                                                                                                                                                                                                                                                                                                                                                                                                                  |          |          |          |          |   |   |      |          |  |  |  |  |     |          |          |  |  |  |     |          |          |          |  |  |     |          |          |          |          |  |      |          |          |          |          |          |      |          |          |          |          |          |      |          |          |          |          |          |     |          |          |          |          |          |     |          |          |          |          |          |       |          |          |          |          |          |       |          |          |          |          |          |  |   |   |   |   |    |      |          |  |  |  |  |      |          |          |  |  |  |     |          |          |          |  |  |     |          |          |          |          |  |       |          |          |          |          |          |       |          |          |          |          |          |
| 7 Ru                                                                                                              | 2.258152                                                                                                                                                                                                                                                                                                                                                                                                                                                                                                                                                                                                                                                                                                                                                                                                                                                                                                                                                                                                                                                                                                                                                                                                                                                                                                                                                                                                                                                                                                                                                                                                                                                                                                                                                                                                                                                                                                                                                  | 0.000000 |          |          |          |   |   |      |          |  |  |  |  |     |          |          |  |  |  |     |          |          |          |  |  |     |          |          |          |          |  |      |          |          |          |          |          |      |          |          |          |          |          |      |          |          |          |          |          |     |          |          |          |          |          |     |          |          |          |          |          |       |          |          |          |          |          |       |          |          |          |          |          |  |   |   |   |   |    |      |          |  |  |  |  |      |          |          |  |  |  |     |          |          |          |  |  |     |          |          |          |          |  |       |          |          |          |          |          |       |          |          |          |          |          |
| 8 B                                                                                                               | 4.056614                                                                                                                                                                                                                                                                                                                                                                                                                                                                                                                                                                                                                                                                                                                                                                                                                                                                                                                                                                                                                                                                                                                                                                                                                                                                                                                                                                                                                                                                                                                                                                                                                                                                                                                                                                                                                                                                                                                                                  | 2.382126 | 0.000000 |          |          |   |   |      |          |  |  |  |  |     |          |          |  |  |  |     |          |          |          |  |  |     |          |          |          |          |  |      |          |          |          |          |          |      |          |          |          |          |          |      |          |          |          |          |          |     |          |          |          |          |          |     |          |          |          |          |          |       |          |          |          |          |          |       |          |          |          |          |          |  |   |   |   |   |    |      |          |  |  |  |  |      |          |          |  |  |  |     |          |          |          |  |  |     |          |          |          |          |  |       |          |          |          |          |          |       |          |          |          |          |          |
| 9 B                                                                                                               | 3.950243                                                                                                                                                                                                                                                                                                                                                                                                                                                                                                                                                                                                                                                                                                                                                                                                                                                                                                                                                                                                                                                                                                                                                                                                                                                                                                                                                                                                                                                                                                                                                                                                                                                                                                                                                                                                                                                                                                                                                  | 2.181681 | 1.713598 | 0.000000 |          |   |   |      |          |  |  |  |  |     |          |          |  |  |  |     |          |          |          |  |  |     |          |          |          |          |  |      |          |          |          |          |          |      |          |          |          |          |          |      |          |          |          |          |          |     |          |          |          |          |          |     |          |          |          |          |          |       |          |          |          |          |          |       |          |          |          |          |          |  |   |   |   |   |    |      |          |  |  |  |  |      |          |          |  |  |  |     |          |          |          |  |  |     |          |          |          |          |  |       |          |          |          |          |          |       |          |          |          |          |          |
| 10 B                                                                                                              | 3.128218                                                                                                                                                                                                                                                                                                                                                                                                                                                                                                                                                                                                                                                                                                                                                                                                                                                                                                                                                                                                                                                                                                                                                                                                                                                                                                                                                                                                                                                                                                                                                                                                                                                                                                                                                                                                                                                                                                                                                  | 3.188551 | 2.871527 | 2.941475 | 0.000000 |   |   |      |          |  |  |  |  |     |          |          |  |  |  |     |          |          |          |  |  |     |          |          |          |          |  |      |          |          |          |          |          |      |          |          |          |          |          |      |          |          |          |          |          |     |          |          |          |          |          |     |          |          |          |          |          |       |          |          |          |          |          |       |          |          |          |          |          |  |   |   |   |   |    |      |          |  |  |  |  |      |          |          |  |  |  |     |          |          |          |  |  |     |          |          |          |          |  |       |          |          |          |          |          |       |          |          |          |          |          |
| 11 Ru                                                                                                             | 2.093811                                                                                                                                                                                                                                                                                                                                                                                                                                                                                                                                                                                                                                                                                                                                                                                                                                                                                                                                                                                                                                                                                                                                                                                                                                                                                                                                                                                                                                                                                                                                                                                                                                                                                                                                                                                                                                                                                                                                                  | 2.825805 | 3.263641 | 3.941333 | 2.266609 |   |   |      |          |  |  |  |  |     |          |          |  |  |  |     |          |          |          |  |  |     |          |          |          |          |  |      |          |          |          |          |          |      |          |          |          |          |          |      |          |          |          |          |          |     |          |          |          |          |          |     |          |          |          |          |          |       |          |          |          |          |          |       |          |          |          |          |          |  |   |   |   |   |    |      |          |  |  |  |  |      |          |          |  |  |  |     |          |          |          |  |  |     |          |          |          |          |  |       |          |          |          |          |          |       |          |          |          |          |          |
|  <p>2. -806.17167861 +8.9</p>   | <table border="1"> <thead> <tr> <th></th> <th>1</th> <th>2</th> <th>3</th> <th>4</th> <th>5</th> </tr> </thead> <tbody> <tr><td>1 Ru</td><td>0.000000</td><td></td><td></td><td></td><td></td></tr> <tr><td>2 B</td><td>2.213730</td><td>0.000000</td><td></td><td></td><td></td></tr> <tr><td>3 B</td><td>2.267516</td><td>1.847064</td><td>0.000000</td><td></td><td></td></tr> <tr><td>4 B</td><td>3.316906</td><td>1.739400</td><td>2.915062</td><td>0.000000</td><td></td></tr> <tr><td>5 B</td><td>3.301117</td><td>2.807591</td><td>1.782810</td><td>2.758010</td><td>0.000000</td></tr> <tr><td>6 Ru</td><td>2.835528</td><td>2.968171</td><td>3.074793</td><td>2.335944</td><td>2.326405</td></tr> <tr><td>7 B</td><td>2.041586</td><td>1.678298</td><td>1.861624</td><td>3.408651</td><td>3.554427</td></tr> <tr><td>8 B</td><td>3.975990</td><td>2.842863</td><td>2.926887</td><td>1.735979</td><td>1.733079</td></tr> <tr><td>9 B</td><td>2.093464</td><td>2.944908</td><td>1.837199</td><td>3.431127</td><td>1.787523</td></tr> <tr><td>10 B</td><td>2.114183</td><td>1.819176</td><td>3.066669</td><td>1.800925</td><td>3.418363</td></tr> <tr><td>11 B</td><td>3.478204</td><td>1.813002</td><td>1.844770</td><td>1.811678</td><td>1.780434</td></tr> <tr> <td></td> <td>6</td> <td>7</td> <td>8</td> <td>9</td> <td>10</td> </tr> <tr><td>6 Ru</td><td>0.000000</td><td></td><td></td><td></td><td></td></tr> <tr><td>7 B</td><td>4.092809</td><td>0.000000</td><td></td><td></td><td></td></tr> <tr><td>8 B</td><td>2.104711</td><td>4.232900</td><td>0.000000</td><td></td><td></td></tr> <tr><td>9 B</td><td>2.158952</td><td>3.164409</td><td>3.058170</td><td>0.000000</td><td></td></tr> <tr><td>10 B</td><td>2.129597</td><td>3.004245</td><td>3.050405</td><td>3.085748</td><td>0.000000</td></tr> <tr><td>11 B</td><td>3.020955</td><td>2.933943</td><td>1.716391</td><td>3.004585</td><td>3.038702</td></tr> </tbody> </table>  |          | 1        | 2        | 3        | 4 | 5 | 1 Ru | 0.000000 |  |  |  |  | 2 B | 2.213730 | 0.000000 |  |  |  | 3 B | 2.267516 | 1.847064 | 0.000000 |  |  | 4 B | 3.316906 | 1.739400 | 2.915062 | 0.000000 |  | 5 B  | 3.301117 | 2.807591 | 1.782810 | 2.758010 | 0.000000 | 6 Ru | 2.835528 | 2.968171 | 3.074793 | 2.335944 | 2.326405 | 7 B  | 2.041586 | 1.678298 | 1.861624 | 3.408651 | 3.554427 | 8 B | 3.975990 | 2.842863 | 2.926887 | 1.735979 | 1.733079 | 9 B | 2.093464 | 2.944908 | 1.837199 | 3.431127 | 1.787523 | 10 B  | 2.114183 | 1.819176 | 3.066669 | 1.800925 | 3.418363 | 11 B  | 3.478204 | 1.813002 | 1.844770 | 1.811678 | 1.780434 |  | 6 | 7 | 8 | 9 | 10 | 6 Ru | 0.000000 |  |  |  |  | 7 B  | 4.092809 | 0.000000 |  |  |  | 8 B | 2.104711 | 4.232900 | 0.000000 |  |  | 9 B | 2.158952 | 3.164409 | 3.058170 | 0.000000 |  | 10 B  | 2.129597 | 3.004245 | 3.050405 | 3.085748 | 0.000000 | 11 B  | 3.020955 | 2.933943 | 1.716391 | 3.004585 | 3.038702 |
|                                                                                                                   | 1                                                                                                                                                                                                                                                                                                                                                                                                                                                                                                                                                                                                                                                                                                                                                                                                                                                                                                                                                                                                                                                                                                                                                                                                                                                                                                                                                                                                                                                                                                                                                                                                                                                                                                                                                                                                                                                                                                                                                         | 2        | 3        | 4        | 5        |   |   |      |          |  |  |  |  |     |          |          |  |  |  |     |          |          |          |  |  |     |          |          |          |          |  |      |          |          |          |          |          |      |          |          |          |          |          |      |          |          |          |          |          |     |          |          |          |          |          |     |          |          |          |          |          |       |          |          |          |          |          |       |          |          |          |          |          |  |   |   |   |   |    |      |          |  |  |  |  |      |          |          |  |  |  |     |          |          |          |  |  |     |          |          |          |          |  |       |          |          |          |          |          |       |          |          |          |          |          |
| 1 Ru                                                                                                              | 0.000000                                                                                                                                                                                                                                                                                                                                                                                                                                                                                                                                                                                                                                                                                                                                                                                                                                                                                                                                                                                                                                                                                                                                                                                                                                                                                                                                                                                                                                                                                                                                                                                                                                                                                                                                                                                                                                                                                                                                                  |          |          |          |          |   |   |      |          |  |  |  |  |     |          |          |  |  |  |     |          |          |          |  |  |     |          |          |          |          |  |      |          |          |          |          |          |      |          |          |          |          |          |      |          |          |          |          |          |     |          |          |          |          |          |     |          |          |          |          |          |       |          |          |          |          |          |       |          |          |          |          |          |  |   |   |   |   |    |      |          |  |  |  |  |      |          |          |  |  |  |     |          |          |          |  |  |     |          |          |          |          |  |       |          |          |          |          |          |       |          |          |          |          |          |
| 2 B                                                                                                               | 2.213730                                                                                                                                                                                                                                                                                                                                                                                                                                                                                                                                                                                                                                                                                                                                                                                                                                                                                                                                                                                                                                                                                                                                                                                                                                                                                                                                                                                                                                                                                                                                                                                                                                                                                                                                                                                                                                                                                                                                                  | 0.000000 |          |          |          |   |   |      |          |  |  |  |  |     |          |          |  |  |  |     |          |          |          |  |  |     |          |          |          |          |  |      |          |          |          |          |          |      |          |          |          |          |          |      |          |          |          |          |          |     |          |          |          |          |          |     |          |          |          |          |          |       |          |          |          |          |          |       |          |          |          |          |          |  |   |   |   |   |    |      |          |  |  |  |  |      |          |          |  |  |  |     |          |          |          |  |  |     |          |          |          |          |  |       |          |          |          |          |          |       |          |          |          |          |          |
| 3 B                                                                                                               | 2.267516                                                                                                                                                                                                                                                                                                                                                                                                                                                                                                                                                                                                                                                                                                                                                                                                                                                                                                                                                                                                                                                                                                                                                                                                                                                                                                                                                                                                                                                                                                                                                                                                                                                                                                                                                                                                                                                                                                                                                  | 1.847064 | 0.000000 |          |          |   |   |      |          |  |  |  |  |     |          |          |  |  |  |     |          |          |          |  |  |     |          |          |          |          |  |      |          |          |          |          |          |      |          |          |          |          |          |      |          |          |          |          |          |     |          |          |          |          |          |     |          |          |          |          |          |       |          |          |          |          |          |       |          |          |          |          |          |  |   |   |   |   |    |      |          |  |  |  |  |      |          |          |  |  |  |     |          |          |          |  |  |     |          |          |          |          |  |       |          |          |          |          |          |       |          |          |          |          |          |
| 4 B                                                                                                               | 3.316906                                                                                                                                                                                                                                                                                                                                                                                                                                                                                                                                                                                                                                                                                                                                                                                                                                                                                                                                                                                                                                                                                                                                                                                                                                                                                                                                                                                                                                                                                                                                                                                                                                                                                                                                                                                                                                                                                                                                                  | 1.739400 | 2.915062 | 0.000000 |          |   |   |      |          |  |  |  |  |     |          |          |  |  |  |     |          |          |          |  |  |     |          |          |          |          |  |      |          |          |          |          |          |      |          |          |          |          |          |      |          |          |          |          |          |     |          |          |          |          |          |     |          |          |          |          |          |       |          |          |          |          |          |       |          |          |          |          |          |  |   |   |   |   |    |      |          |  |  |  |  |      |          |          |  |  |  |     |          |          |          |  |  |     |          |          |          |          |  |       |          |          |          |          |          |       |          |          |          |          |          |
| 5 B                                                                                                               | 3.301117                                                                                                                                                                                                                                                                                                                                                                                                                                                                                                                                                                                                                                                                                                                                                                                                                                                                                                                                                                                                                                                                                                                                                                                                                                                                                                                                                                                                                                                                                                                                                                                                                                                                                                                                                                                                                                                                                                                                                  | 2.807591 | 1.782810 | 2.758010 | 0.000000 |   |   |      |          |  |  |  |  |     |          |          |  |  |  |     |          |          |          |  |  |     |          |          |          |          |  |      |          |          |          |          |          |      |          |          |          |          |          |      |          |          |          |          |          |     |          |          |          |          |          |     |          |          |          |          |          |       |          |          |          |          |          |       |          |          |          |          |          |  |   |   |   |   |    |      |          |  |  |  |  |      |          |          |  |  |  |     |          |          |          |  |  |     |          |          |          |          |  |       |          |          |          |          |          |       |          |          |          |          |          |
| 6 Ru                                                                                                              | 2.835528                                                                                                                                                                                                                                                                                                                                                                                                                                                                                                                                                                                                                                                                                                                                                                                                                                                                                                                                                                                                                                                                                                                                                                                                                                                                                                                                                                                                                                                                                                                                                                                                                                                                                                                                                                                                                                                                                                                                                  | 2.968171 | 3.074793 | 2.335944 | 2.326405 |   |   |      |          |  |  |  |  |     |          |          |  |  |  |     |          |          |          |  |  |     |          |          |          |          |  |      |          |          |          |          |          |      |          |          |          |          |          |      |          |          |          |          |          |     |          |          |          |          |          |     |          |          |          |          |          |       |          |          |          |          |          |       |          |          |          |          |          |  |   |   |   |   |    |      |          |  |  |  |  |      |          |          |  |  |  |     |          |          |          |  |  |     |          |          |          |          |  |       |          |          |          |          |          |       |          |          |          |          |          |
| 7 B                                                                                                               | 2.041586                                                                                                                                                                                                                                                                                                                                                                                                                                                                                                                                                                                                                                                                                                                                                                                                                                                                                                                                                                                                                                                                                                                                                                                                                                                                                                                                                                                                                                                                                                                                                                                                                                                                                                                                                                                                                                                                                                                                                  | 1.678298 | 1.861624 | 3.408651 | 3.554427 |   |   |      |          |  |  |  |  |     |          |          |  |  |  |     |          |          |          |  |  |     |          |          |          |          |  |      |          |          |          |          |          |      |          |          |          |          |          |      |          |          |          |          |          |     |          |          |          |          |          |     |          |          |          |          |          |       |          |          |          |          |          |       |          |          |          |          |          |  |   |   |   |   |    |      |          |  |  |  |  |      |          |          |  |  |  |     |          |          |          |  |  |     |          |          |          |          |  |       |          |          |          |          |          |       |          |          |          |          |          |
| 8 B                                                                                                               | 3.975990                                                                                                                                                                                                                                                                                                                                                                                                                                                                                                                                                                                                                                                                                                                                                                                                                                                                                                                                                                                                                                                                                                                                                                                                                                                                                                                                                                                                                                                                                                                                                                                                                                                                                                                                                                                                                                                                                                                                                  | 2.842863 | 2.926887 | 1.735979 | 1.733079 |   |   |      |          |  |  |  |  |     |          |          |  |  |  |     |          |          |          |  |  |     |          |          |          |          |  |      |          |          |          |          |          |      |          |          |          |          |          |      |          |          |          |          |          |     |          |          |          |          |          |     |          |          |          |          |          |       |          |          |          |          |          |       |          |          |          |          |          |  |   |   |   |   |    |      |          |  |  |  |  |      |          |          |  |  |  |     |          |          |          |  |  |     |          |          |          |          |  |       |          |          |          |          |          |       |          |          |          |          |          |
| 9 B                                                                                                               | 2.093464                                                                                                                                                                                                                                                                                                                                                                                                                                                                                                                                                                                                                                                                                                                                                                                                                                                                                                                                                                                                                                                                                                                                                                                                                                                                                                                                                                                                                                                                                                                                                                                                                                                                                                                                                                                                                                                                                                                                                  | 2.944908 | 1.837199 | 3.431127 | 1.787523 |   |   |      |          |  |  |  |  |     |          |          |  |  |  |     |          |          |          |  |  |     |          |          |          |          |  |      |          |          |          |          |          |      |          |          |          |          |          |      |          |          |          |          |          |     |          |          |          |          |          |     |          |          |          |          |          |       |          |          |          |          |          |       |          |          |          |          |          |  |   |   |   |   |    |      |          |  |  |  |  |      |          |          |  |  |  |     |          |          |          |  |  |     |          |          |          |          |  |       |          |          |          |          |          |       |          |          |          |          |          |
| 10 B                                                                                                              | 2.114183                                                                                                                                                                                                                                                                                                                                                                                                                                                                                                                                                                                                                                                                                                                                                                                                                                                                                                                                                                                                                                                                                                                                                                                                                                                                                                                                                                                                                                                                                                                                                                                                                                                                                                                                                                                                                                                                                                                                                  | 1.819176 | 3.066669 | 1.800925 | 3.418363 |   |   |      |          |  |  |  |  |     |          |          |  |  |  |     |          |          |          |  |  |     |          |          |          |          |  |      |          |          |          |          |          |      |          |          |          |          |          |      |          |          |          |          |          |     |          |          |          |          |          |     |          |          |          |          |          |       |          |          |          |          |          |       |          |          |          |          |          |  |   |   |   |   |    |      |          |  |  |  |  |      |          |          |  |  |  |     |          |          |          |  |  |     |          |          |          |          |  |       |          |          |          |          |          |       |          |          |          |          |          |
| 11 B                                                                                                              | 3.478204                                                                                                                                                                                                                                                                                                                                                                                                                                                                                                                                                                                                                                                                                                                                                                                                                                                                                                                                                                                                                                                                                                                                                                                                                                                                                                                                                                                                                                                                                                                                                                                                                                                                                                                                                                                                                                                                                                                                                  | 1.813002 | 1.844770 | 1.811678 | 1.780434 |   |   |      |          |  |  |  |  |     |          |          |  |  |  |     |          |          |          |  |  |     |          |          |          |          |  |      |          |          |          |          |          |      |          |          |          |          |          |      |          |          |          |          |          |     |          |          |          |          |          |     |          |          |          |          |          |       |          |          |          |          |          |       |          |          |          |          |          |  |   |   |   |   |    |      |          |  |  |  |  |      |          |          |  |  |  |     |          |          |          |  |  |     |          |          |          |          |  |       |          |          |          |          |          |       |          |          |          |          |          |
|                                                                                                                   | 6                                                                                                                                                                                                                                                                                                                                                                                                                                                                                                                                                                                                                                                                                                                                                                                                                                                                                                                                                                                                                                                                                                                                                                                                                                                                                                                                                                                                                                                                                                                                                                                                                                                                                                                                                                                                                                                                                                                                                         | 7        | 8        | 9        | 10       |   |   |      |          |  |  |  |  |     |          |          |  |  |  |     |          |          |          |  |  |     |          |          |          |          |  |      |          |          |          |          |          |      |          |          |          |          |          |      |          |          |          |          |          |     |          |          |          |          |          |     |          |          |          |          |          |       |          |          |          |          |          |       |          |          |          |          |          |  |   |   |   |   |    |      |          |  |  |  |  |      |          |          |  |  |  |     |          |          |          |  |  |     |          |          |          |          |  |       |          |          |          |          |          |       |          |          |          |          |          |
| 6 Ru                                                                                                              | 0.000000                                                                                                                                                                                                                                                                                                                                                                                                                                                                                                                                                                                                                                                                                                                                                                                                                                                                                                                                                                                                                                                                                                                                                                                                                                                                                                                                                                                                                                                                                                                                                                                                                                                                                                                                                                                                                                                                                                                                                  |          |          |          |          |   |   |      |          |  |  |  |  |     |          |          |  |  |  |     |          |          |          |  |  |     |          |          |          |          |  |      |          |          |          |          |          |      |          |          |          |          |          |      |          |          |          |          |          |     |          |          |          |          |          |     |          |          |          |          |          |       |          |          |          |          |          |       |          |          |          |          |          |  |   |   |   |   |    |      |          |  |  |  |  |      |          |          |  |  |  |     |          |          |          |  |  |     |          |          |          |          |  |       |          |          |          |          |          |       |          |          |          |          |          |
| 7 B                                                                                                               | 4.092809                                                                                                                                                                                                                                                                                                                                                                                                                                                                                                                                                                                                                                                                                                                                                                                                                                                                                                                                                                                                                                                                                                                                                                                                                                                                                                                                                                                                                                                                                                                                                                                                                                                                                                                                                                                                                                                                                                                                                  | 0.000000 |          |          |          |   |   |      |          |  |  |  |  |     |          |          |  |  |  |     |          |          |          |  |  |     |          |          |          |          |  |      |          |          |          |          |          |      |          |          |          |          |          |      |          |          |          |          |          |     |          |          |          |          |          |     |          |          |          |          |          |       |          |          |          |          |          |       |          |          |          |          |          |  |   |   |   |   |    |      |          |  |  |  |  |      |          |          |  |  |  |     |          |          |          |  |  |     |          |          |          |          |  |       |          |          |          |          |          |       |          |          |          |          |          |
| 8 B                                                                                                               | 2.104711                                                                                                                                                                                                                                                                                                                                                                                                                                                                                                                                                                                                                                                                                                                                                                                                                                                                                                                                                                                                                                                                                                                                                                                                                                                                                                                                                                                                                                                                                                                                                                                                                                                                                                                                                                                                                                                                                                                                                  | 4.232900 | 0.000000 |          |          |   |   |      |          |  |  |  |  |     |          |          |  |  |  |     |          |          |          |  |  |     |          |          |          |          |  |      |          |          |          |          |          |      |          |          |          |          |          |      |          |          |          |          |          |     |          |          |          |          |          |     |          |          |          |          |          |       |          |          |          |          |          |       |          |          |          |          |          |  |   |   |   |   |    |      |          |  |  |  |  |      |          |          |  |  |  |     |          |          |          |  |  |     |          |          |          |          |  |       |          |          |          |          |          |       |          |          |          |          |          |
| 9 B                                                                                                               | 2.158952                                                                                                                                                                                                                                                                                                                                                                                                                                                                                                                                                                                                                                                                                                                                                                                                                                                                                                                                                                                                                                                                                                                                                                                                                                                                                                                                                                                                                                                                                                                                                                                                                                                                                                                                                                                                                                                                                                                                                  | 3.164409 | 3.058170 | 0.000000 |          |   |   |      |          |  |  |  |  |     |          |          |  |  |  |     |          |          |          |  |  |     |          |          |          |          |  |      |          |          |          |          |          |      |          |          |          |          |          |      |          |          |          |          |          |     |          |          |          |          |          |     |          |          |          |          |          |       |          |          |          |          |          |       |          |          |          |          |          |  |   |   |   |   |    |      |          |  |  |  |  |      |          |          |  |  |  |     |          |          |          |  |  |     |          |          |          |          |  |       |          |          |          |          |          |       |          |          |          |          |          |
| 10 B                                                                                                              | 2.129597                                                                                                                                                                                                                                                                                                                                                                                                                                                                                                                                                                                                                                                                                                                                                                                                                                                                                                                                                                                                                                                                                                                                                                                                                                                                                                                                                                                                                                                                                                                                                                                                                                                                                                                                                                                                                                                                                                                                                  | 3.004245 | 3.050405 | 3.085748 | 0.000000 |   |   |      |          |  |  |  |  |     |          |          |  |  |  |     |          |          |          |  |  |     |          |          |          |          |  |      |          |          |          |          |          |      |          |          |          |          |          |      |          |          |          |          |          |     |          |          |          |          |          |     |          |          |          |          |          |       |          |          |          |          |          |       |          |          |          |          |          |  |   |   |   |   |    |      |          |  |  |  |  |      |          |          |  |  |  |     |          |          |          |  |  |     |          |          |          |          |  |       |          |          |          |          |          |       |          |          |          |          |          |
| 11 B                                                                                                              | 3.020955                                                                                                                                                                                                                                                                                                                                                                                                                                                                                                                                                                                                                                                                                                                                                                                                                                                                                                                                                                                                                                                                                                                                                                                                                                                                                                                                                                                                                                                                                                                                                                                                                                                                                                                                                                                                                                                                                                                                                  | 2.933943 | 1.716391 | 3.004585 | 3.038702 |   |   |      |          |  |  |  |  |     |          |          |  |  |  |     |          |          |          |  |  |     |          |          |          |          |  |      |          |          |          |          |          |      |          |          |          |          |          |      |          |          |          |          |          |     |          |          |          |          |          |     |          |          |          |          |          |       |          |          |          |          |          |       |          |          |          |          |          |  |   |   |   |   |    |      |          |  |  |  |  |      |          |          |  |  |  |     |          |          |          |  |  |     |          |          |          |          |  |       |          |          |          |          |          |       |          |          |          |          |          |
|  <p>3. -806.16658996 +12.0</p> | <table border="1"> <thead> <tr> <th></th> <th>1</th> <th>2</th> <th>3</th> <th>4</th> <th>5</th> </tr> </thead> <tbody> <tr><td>1 B</td><td>0.000000</td><td></td><td></td><td></td><td></td></tr> <tr><td>2 B</td><td>1.820570</td><td>0.000000</td><td></td><td></td><td></td></tr> <tr><td>3 B</td><td>3.709009</td><td>3.040279</td><td>0.000000</td><td></td><td></td></tr> <tr><td>4 B</td><td>2.716580</td><td>2.947977</td><td>1.724285</td><td>0.000000</td><td></td></tr> <tr><td>5 Ru</td><td>2.329648</td><td>3.323831</td><td>3.585961</td><td>2.005149</td><td>0.000000</td></tr> <tr><td>6 B</td><td>1.791000</td><td>1.814353</td><td>2.927190</td><td>2.645933</td><td>3.467743</td></tr> <tr><td>7 B</td><td>1.773529</td><td>2.852769</td><td>3.035133</td><td>1.810116</td><td>2.288327</td></tr> <tr><td>8 B</td><td>1.793637</td><td>1.747170</td><td>3.599347</td><td>2.848384</td><td>2.198264</td></tr> <tr><td>9 B</td><td>2.992506</td><td>2.938303</td><td>1.736312</td><td>1.766498</td><td>3.472490</td></tr> <tr><td>10 Ru</td><td>3.177686</td><td>2.276457</td><td>2.073602</td><td>2.227809</td><td>2.899872</td></tr> <tr><td>11 B</td><td>2.929344</td><td>1.753889</td><td>1.765936</td><td>2.539192</td><td>3.909673</td></tr> <tr> <td></td> <td>6</td> <td>7</td> <td>8</td> <td>9</td> <td>10</td> </tr> <tr><td>6 B</td><td>0.000000</td><td></td><td></td><td></td><td></td></tr> <tr><td>7 B</td><td>1.756857</td><td>0.000000</td><td></td><td></td><td></td></tr> <tr><td>8 B</td><td>2.979401</td><td>3.023931</td><td>0.000000</td><td></td><td></td></tr> <tr><td>9 B</td><td>1.799914</td><td>1.840880</td><td>3.743447</td><td>0.000000</td><td></td></tr> <tr><td>10 Ru</td><td>3.314559</td><td>3.462324</td><td>2.097363</td><td>3.154198</td><td>0.000000</td></tr> <tr><td>11 B</td><td>1.786387</td><td>2.891075</td><td>3.090270</td><td>1.847212</td><td>2.311872</td></tr> </tbody> </table>  |          | 1        | 2        | 3        | 4 | 5 | 1 B  | 0.000000 |  |  |  |  | 2 B | 1.820570 | 0.000000 |  |  |  | 3 B | 3.709009 | 3.040279 | 0.000000 |  |  | 4 B | 2.716580 | 2.947977 | 1.724285 | 0.000000 |  | 5 Ru | 2.329648 | 3.323831 | 3.585961 | 2.005149 | 0.000000 | 6 B  | 1.791000 | 1.814353 | 2.927190 | 2.645933 | 3.467743 | 7 B  | 1.773529 | 2.852769 | 3.035133 | 1.810116 | 2.288327 | 8 B | 1.793637 | 1.747170 | 3.599347 | 2.848384 | 2.198264 | 9 B | 2.992506 | 2.938303 | 1.736312 | 1.766498 | 3.472490 | 10 Ru | 3.177686 | 2.276457 | 2.073602 | 2.227809 | 2.899872 | 11 B  | 2.929344 | 1.753889 | 1.765936 | 2.539192 | 3.909673 |  | 6 | 7 | 8 | 9 | 10 | 6 B  | 0.000000 |  |  |  |  | 7 B  | 1.756857 | 0.000000 |  |  |  | 8 B | 2.979401 | 3.023931 | 0.000000 |  |  | 9 B | 1.799914 | 1.840880 | 3.743447 | 0.000000 |  | 10 Ru | 3.314559 | 3.462324 | 2.097363 | 3.154198 | 0.000000 | 11 B  | 1.786387 | 2.891075 | 3.090270 | 1.847212 | 2.311872 |
|                                                                                                                   | 1                                                                                                                                                                                                                                                                                                                                                                                                                                                                                                                                                                                                                                                                                                                                                                                                                                                                                                                                                                                                                                                                                                                                                                                                                                                                                                                                                                                                                                                                                                                                                                                                                                                                                                                                                                                                                                                                                                                                                         | 2        | 3        | 4        | 5        |   |   |      |          |  |  |  |  |     |          |          |  |  |  |     |          |          |          |  |  |     |          |          |          |          |  |      |          |          |          |          |          |      |          |          |          |          |          |      |          |          |          |          |          |     |          |          |          |          |          |     |          |          |          |          |          |       |          |          |          |          |          |       |          |          |          |          |          |  |   |   |   |   |    |      |          |  |  |  |  |      |          |          |  |  |  |     |          |          |          |  |  |     |          |          |          |          |  |       |          |          |          |          |          |       |          |          |          |          |          |
| 1 B                                                                                                               | 0.000000                                                                                                                                                                                                                                                                                                                                                                                                                                                                                                                                                                                                                                                                                                                                                                                                                                                                                                                                                                                                                                                                                                                                                                                                                                                                                                                                                                                                                                                                                                                                                                                                                                                                                                                                                                                                                                                                                                                                                  |          |          |          |          |   |   |      |          |  |  |  |  |     |          |          |  |  |  |     |          |          |          |  |  |     |          |          |          |          |  |      |          |          |          |          |          |      |          |          |          |          |          |      |          |          |          |          |          |     |          |          |          |          |          |     |          |          |          |          |          |       |          |          |          |          |          |       |          |          |          |          |          |  |   |   |   |   |    |      |          |  |  |  |  |      |          |          |  |  |  |     |          |          |          |  |  |     |          |          |          |          |  |       |          |          |          |          |          |       |          |          |          |          |          |
| 2 B                                                                                                               | 1.820570                                                                                                                                                                                                                                                                                                                                                                                                                                                                                                                                                                                                                                                                                                                                                                                                                                                                                                                                                                                                                                                                                                                                                                                                                                                                                                                                                                                                                                                                                                                                                                                                                                                                                                                                                                                                                                                                                                                                                  | 0.000000 |          |          |          |   |   |      |          |  |  |  |  |     |          |          |  |  |  |     |          |          |          |  |  |     |          |          |          |          |  |      |          |          |          |          |          |      |          |          |          |          |          |      |          |          |          |          |          |     |          |          |          |          |          |     |          |          |          |          |          |       |          |          |          |          |          |       |          |          |          |          |          |  |   |   |   |   |    |      |          |  |  |  |  |      |          |          |  |  |  |     |          |          |          |  |  |     |          |          |          |          |  |       |          |          |          |          |          |       |          |          |          |          |          |
| 3 B                                                                                                               | 3.709009                                                                                                                                                                                                                                                                                                                                                                                                                                                                                                                                                                                                                                                                                                                                                                                                                                                                                                                                                                                                                                                                                                                                                                                                                                                                                                                                                                                                                                                                                                                                                                                                                                                                                                                                                                                                                                                                                                                                                  | 3.040279 | 0.000000 |          |          |   |   |      |          |  |  |  |  |     |          |          |  |  |  |     |          |          |          |  |  |     |          |          |          |          |  |      |          |          |          |          |          |      |          |          |          |          |          |      |          |          |          |          |          |     |          |          |          |          |          |     |          |          |          |          |          |       |          |          |          |          |          |       |          |          |          |          |          |  |   |   |   |   |    |      |          |  |  |  |  |      |          |          |  |  |  |     |          |          |          |  |  |     |          |          |          |          |  |       |          |          |          |          |          |       |          |          |          |          |          |
| 4 B                                                                                                               | 2.716580                                                                                                                                                                                                                                                                                                                                                                                                                                                                                                                                                                                                                                                                                                                                                                                                                                                                                                                                                                                                                                                                                                                                                                                                                                                                                                                                                                                                                                                                                                                                                                                                                                                                                                                                                                                                                                                                                                                                                  | 2.947977 | 1.724285 | 0.000000 |          |   |   |      |          |  |  |  |  |     |          |          |  |  |  |     |          |          |          |  |  |     |          |          |          |          |  |      |          |          |          |          |          |      |          |          |          |          |          |      |          |          |          |          |          |     |          |          |          |          |          |     |          |          |          |          |          |       |          |          |          |          |          |       |          |          |          |          |          |  |   |   |   |   |    |      |          |  |  |  |  |      |          |          |  |  |  |     |          |          |          |  |  |     |          |          |          |          |  |       |          |          |          |          |          |       |          |          |          |          |          |
| 5 Ru                                                                                                              | 2.329648                                                                                                                                                                                                                                                                                                                                                                                                                                                                                                                                                                                                                                                                                                                                                                                                                                                                                                                                                                                                                                                                                                                                                                                                                                                                                                                                                                                                                                                                                                                                                                                                                                                                                                                                                                                                                                                                                                                                                  | 3.323831 | 3.585961 | 2.005149 | 0.000000 |   |   |      |          |  |  |  |  |     |          |          |  |  |  |     |          |          |          |  |  |     |          |          |          |          |  |      |          |          |          |          |          |      |          |          |          |          |          |      |          |          |          |          |          |     |          |          |          |          |          |     |          |          |          |          |          |       |          |          |          |          |          |       |          |          |          |          |          |  |   |   |   |   |    |      |          |  |  |  |  |      |          |          |  |  |  |     |          |          |          |  |  |     |          |          |          |          |  |       |          |          |          |          |          |       |          |          |          |          |          |
| 6 B                                                                                                               | 1.791000                                                                                                                                                                                                                                                                                                                                                                                                                                                                                                                                                                                                                                                                                                                                                                                                                                                                                                                                                                                                                                                                                                                                                                                                                                                                                                                                                                                                                                                                                                                                                                                                                                                                                                                                                                                                                                                                                                                                                  | 1.814353 | 2.927190 | 2.645933 | 3.467743 |   |   |      |          |  |  |  |  |     |          |          |  |  |  |     |          |          |          |  |  |     |          |          |          |          |  |      |          |          |          |          |          |      |          |          |          |          |          |      |          |          |          |          |          |     |          |          |          |          |          |     |          |          |          |          |          |       |          |          |          |          |          |       |          |          |          |          |          |  |   |   |   |   |    |      |          |  |  |  |  |      |          |          |  |  |  |     |          |          |          |  |  |     |          |          |          |          |  |       |          |          |          |          |          |       |          |          |          |          |          |
| 7 B                                                                                                               | 1.773529                                                                                                                                                                                                                                                                                                                                                                                                                                                                                                                                                                                                                                                                                                                                                                                                                                                                                                                                                                                                                                                                                                                                                                                                                                                                                                                                                                                                                                                                                                                                                                                                                                                                                                                                                                                                                                                                                                                                                  | 2.852769 | 3.035133 | 1.810116 | 2.288327 |   |   |      |          |  |  |  |  |     |          |          |  |  |  |     |          |          |          |  |  |     |          |          |          |          |  |      |          |          |          |          |          |      |          |          |          |          |          |      |          |          |          |          |          |     |          |          |          |          |          |     |          |          |          |          |          |       |          |          |          |          |          |       |          |          |          |          |          |  |   |   |   |   |    |      |          |  |  |  |  |      |          |          |  |  |  |     |          |          |          |  |  |     |          |          |          |          |  |       |          |          |          |          |          |       |          |          |          |          |          |
| 8 B                                                                                                               | 1.793637                                                                                                                                                                                                                                                                                                                                                                                                                                                                                                                                                                                                                                                                                                                                                                                                                                                                                                                                                                                                                                                                                                                                                                                                                                                                                                                                                                                                                                                                                                                                                                                                                                                                                                                                                                                                                                                                                                                                                  | 1.747170 | 3.599347 | 2.848384 | 2.198264 |   |   |      |          |  |  |  |  |     |          |          |  |  |  |     |          |          |          |  |  |     |          |          |          |          |  |      |          |          |          |          |          |      |          |          |          |          |          |      |          |          |          |          |          |     |          |          |          |          |          |     |          |          |          |          |          |       |          |          |          |          |          |       |          |          |          |          |          |  |   |   |   |   |    |      |          |  |  |  |  |      |          |          |  |  |  |     |          |          |          |  |  |     |          |          |          |          |  |       |          |          |          |          |          |       |          |          |          |          |          |
| 9 B                                                                                                               | 2.992506                                                                                                                                                                                                                                                                                                                                                                                                                                                                                                                                                                                                                                                                                                                                                                                                                                                                                                                                                                                                                                                                                                                                                                                                                                                                                                                                                                                                                                                                                                                                                                                                                                                                                                                                                                                                                                                                                                                                                  | 2.938303 | 1.736312 | 1.766498 | 3.472490 |   |   |      |          |  |  |  |  |     |          |          |  |  |  |     |          |          |          |  |  |     |          |          |          |          |  |      |          |          |          |          |          |      |          |          |          |          |          |      |          |          |          |          |          |     |          |          |          |          |          |     |          |          |          |          |          |       |          |          |          |          |          |       |          |          |          |          |          |  |   |   |   |   |    |      |          |  |  |  |  |      |          |          |  |  |  |     |          |          |          |  |  |     |          |          |          |          |  |       |          |          |          |          |          |       |          |          |          |          |          |
| 10 Ru                                                                                                             | 3.177686                                                                                                                                                                                                                                                                                                                                                                                                                                                                                                                                                                                                                                                                                                                                                                                                                                                                                                                                                                                                                                                                                                                                                                                                                                                                                                                                                                                                                                                                                                                                                                                                                                                                                                                                                                                                                                                                                                                                                  | 2.276457 | 2.073602 | 2.227809 | 2.899872 |   |   |      |          |  |  |  |  |     |          |          |  |  |  |     |          |          |          |  |  |     |          |          |          |          |  |      |          |          |          |          |          |      |          |          |          |          |          |      |          |          |          |          |          |     |          |          |          |          |          |     |          |          |          |          |          |       |          |          |          |          |          |       |          |          |          |          |          |  |   |   |   |   |    |      |          |  |  |  |  |      |          |          |  |  |  |     |          |          |          |  |  |     |          |          |          |          |  |       |          |          |          |          |          |       |          |          |          |          |          |
| 11 B                                                                                                              | 2.929344                                                                                                                                                                                                                                                                                                                                                                                                                                                                                                                                                                                                                                                                                                                                                                                                                                                                                                                                                                                                                                                                                                                                                                                                                                                                                                                                                                                                                                                                                                                                                                                                                                                                                                                                                                                                                                                                                                                                                  | 1.753889 | 1.765936 | 2.539192 | 3.909673 |   |   |      |          |  |  |  |  |     |          |          |  |  |  |     |          |          |          |  |  |     |          |          |          |          |  |      |          |          |          |          |          |      |          |          |          |          |          |      |          |          |          |          |          |     |          |          |          |          |          |     |          |          |          |          |          |       |          |          |          |          |          |       |          |          |          |          |          |  |   |   |   |   |    |      |          |  |  |  |  |      |          |          |  |  |  |     |          |          |          |  |  |     |          |          |          |          |  |       |          |          |          |          |          |       |          |          |          |          |          |
|                                                                                                                   | 6                                                                                                                                                                                                                                                                                                                                                                                                                                                                                                                                                                                                                                                                                                                                                                                                                                                                                                                                                                                                                                                                                                                                                                                                                                                                                                                                                                                                                                                                                                                                                                                                                                                                                                                                                                                                                                                                                                                                                         | 7        | 8        | 9        | 10       |   |   |      |          |  |  |  |  |     |          |          |  |  |  |     |          |          |          |  |  |     |          |          |          |          |  |      |          |          |          |          |          |      |          |          |          |          |          |      |          |          |          |          |          |     |          |          |          |          |          |     |          |          |          |          |          |       |          |          |          |          |          |       |          |          |          |          |          |  |   |   |   |   |    |      |          |  |  |  |  |      |          |          |  |  |  |     |          |          |          |  |  |     |          |          |          |          |  |       |          |          |          |          |          |       |          |          |          |          |          |
| 6 B                                                                                                               | 0.000000                                                                                                                                                                                                                                                                                                                                                                                                                                                                                                                                                                                                                                                                                                                                                                                                                                                                                                                                                                                                                                                                                                                                                                                                                                                                                                                                                                                                                                                                                                                                                                                                                                                                                                                                                                                                                                                                                                                                                  |          |          |          |          |   |   |      |          |  |  |  |  |     |          |          |  |  |  |     |          |          |          |  |  |     |          |          |          |          |  |      |          |          |          |          |          |      |          |          |          |          |          |      |          |          |          |          |          |     |          |          |          |          |          |     |          |          |          |          |          |       |          |          |          |          |          |       |          |          |          |          |          |  |   |   |   |   |    |      |          |  |  |  |  |      |          |          |  |  |  |     |          |          |          |  |  |     |          |          |          |          |  |       |          |          |          |          |          |       |          |          |          |          |          |
| 7 B                                                                                                               | 1.756857                                                                                                                                                                                                                                                                                                                                                                                                                                                                                                                                                                                                                                                                                                                                                                                                                                                                                                                                                                                                                                                                                                                                                                                                                                                                                                                                                                                                                                                                                                                                                                                                                                                                                                                                                                                                                                                                                                                                                  | 0.000000 |          |          |          |   |   |      |          |  |  |  |  |     |          |          |  |  |  |     |          |          |          |  |  |     |          |          |          |          |  |      |          |          |          |          |          |      |          |          |          |          |          |      |          |          |          |          |          |     |          |          |          |          |          |     |          |          |          |          |          |       |          |          |          |          |          |       |          |          |          |          |          |  |   |   |   |   |    |      |          |  |  |  |  |      |          |          |  |  |  |     |          |          |          |  |  |     |          |          |          |          |  |       |          |          |          |          |          |       |          |          |          |          |          |
| 8 B                                                                                                               | 2.979401                                                                                                                                                                                                                                                                                                                                                                                                                                                                                                                                                                                                                                                                                                                                                                                                                                                                                                                                                                                                                                                                                                                                                                                                                                                                                                                                                                                                                                                                                                                                                                                                                                                                                                                                                                                                                                                                                                                                                  | 3.023931 | 0.000000 |          |          |   |   |      |          |  |  |  |  |     |          |          |  |  |  |     |          |          |          |  |  |     |          |          |          |          |  |      |          |          |          |          |          |      |          |          |          |          |          |      |          |          |          |          |          |     |          |          |          |          |          |     |          |          |          |          |          |       |          |          |          |          |          |       |          |          |          |          |          |  |   |   |   |   |    |      |          |  |  |  |  |      |          |          |  |  |  |     |          |          |          |  |  |     |          |          |          |          |  |       |          |          |          |          |          |       |          |          |          |          |          |
| 9 B                                                                                                               | 1.799914                                                                                                                                                                                                                                                                                                                                                                                                                                                                                                                                                                                                                                                                                                                                                                                                                                                                                                                                                                                                                                                                                                                                                                                                                                                                                                                                                                                                                                                                                                                                                                                                                                                                                                                                                                                                                                                                                                                                                  | 1.840880 | 3.743447 | 0.000000 |          |   |   |      |          |  |  |  |  |     |          |          |  |  |  |     |          |          |          |  |  |     |          |          |          |          |  |      |          |          |          |          |          |      |          |          |          |          |          |      |          |          |          |          |          |     |          |          |          |          |          |     |          |          |          |          |          |       |          |          |          |          |          |       |          |          |          |          |          |  |   |   |   |   |    |      |          |  |  |  |  |      |          |          |  |  |  |     |          |          |          |  |  |     |          |          |          |          |  |       |          |          |          |          |          |       |          |          |          |          |          |
| 10 Ru                                                                                                             | 3.314559                                                                                                                                                                                                                                                                                                                                                                                                                                                                                                                                                                                                                                                                                                                                                                                                                                                                                                                                                                                                                                                                                                                                                                                                                                                                                                                                                                                                                                                                                                                                                                                                                                                                                                                                                                                                                                                                                                                                                  | 3.462324 | 2.097363 | 3.154198 | 0.000000 |   |   |      |          |  |  |  |  |     |          |          |  |  |  |     |          |          |          |  |  |     |          |          |          |          |  |      |          |          |          |          |          |      |          |          |          |          |          |      |          |          |          |          |          |     |          |          |          |          |          |     |          |          |          |          |          |       |          |          |          |          |          |       |          |          |          |          |          |  |   |   |   |   |    |      |          |  |  |  |  |      |          |          |  |  |  |     |          |          |          |  |  |     |          |          |          |          |  |       |          |          |          |          |          |       |          |          |          |          |          |
| 11 B                                                                                                              | 1.786387                                                                                                                                                                                                                                                                                                                                                                                                                                                                                                                                                                                                                                                                                                                                                                                                                                                                                                                                                                                                                                                                                                                                                                                                                                                                                                                                                                                                                                                                                                                                                                                                                                                                                                                                                                                                                                                                                                                                                  | 2.891075 | 3.090270 | 1.847212 | 2.311872 |   |   |      |          |  |  |  |  |     |          |          |  |  |  |     |          |          |          |  |  |     |          |          |          |          |  |      |          |          |          |          |          |      |          |          |          |          |          |      |          |          |          |          |          |     |          |          |          |          |          |     |          |          |          |          |          |       |          |          |          |          |          |       |          |          |          |          |          |  |   |   |   |   |    |      |          |  |  |  |  |      |          |          |  |  |  |     |          |          |          |  |  |     |          |          |          |          |  |       |          |          |          |          |          |       |          |          |          |          |          |

| 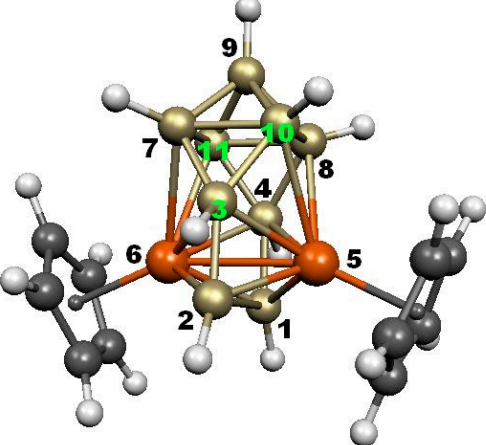 <p>4. -806.16244262 +14.6</p>   | <table border="1"> <thead> <tr> <th></th> <th>1</th> <th>2</th> <th>3</th> <th>4</th> <th>5</th> </tr> </thead> <tbody> <tr><td>1 B</td><td>0.000000</td><td></td><td></td><td></td><td></td></tr> <tr><td>2 B</td><td>3.010806</td><td>0.000000</td><td></td><td></td><td></td></tr> <tr><td>3 B</td><td>3.365594</td><td>1.630464</td><td>0.000000</td><td></td><td></td></tr> <tr><td>4 B</td><td>1.630544</td><td>3.365689</td><td>2.879300</td><td>0.000000</td><td></td></tr> <tr><td>5 Ru</td><td>2.152051</td><td>2.155666</td><td>2.181881</td><td>2.181874</td><td>0.000000</td></tr> <tr><td>6 Ru</td><td>2.149818</td><td>2.146709</td><td>2.183091</td><td>2.182776</td><td>2.721608</td></tr> <tr><td>7 B</td><td>3.987951</td><td>3.170626</td><td>1.704791</td><td>2.914080</td><td>3.359401</td></tr> <tr><td>8 B</td><td>3.170990</td><td>3.986102</td><td>2.911874</td><td>1.705782</td><td>2.508393</td></tr> <tr><td>9 B</td><td>4.306285</td><td>4.305970</td><td>2.802958</td><td>2.803383</td><td>3.585598</td></tr> <tr><td>10 B</td><td>3.986695</td><td>3.172904</td><td>1.705335</td><td>2.913727</td><td>2.510649</td></tr> <tr><td>11 B</td><td>3.172822</td><td>3.987663</td><td>2.914679</td><td>1.704629</td><td>3.359228</td></tr> <tr> <td></td> <td>6</td> <td>7</td> <td>8</td> <td>9</td> <td>10</td> </tr> <tr><td>6 Ru</td><td>0.000000</td><td></td><td></td><td></td><td></td></tr> <tr><td>7 B</td><td>2.517504</td><td>0.000000</td><td></td><td></td><td></td></tr> <tr><td>8 B</td><td>3.362063</td><td>2.664686</td><td>0.000000</td><td></td><td></td></tr> <tr><td>9 B</td><td>3.592265</td><td>1.693719</td><td>1.693393</td><td>0.000000</td><td></td></tr> <tr><td>10 B</td><td>3.362587</td><td>1.828225</td><td>1.936401</td><td>1.692500</td><td>0.000000</td></tr> <tr><td>11 B</td><td>2.519030</td><td>1.940602</td><td>1.828044</td><td>1.692865</td><td>2.664425</td></tr> </tbody> </table> |          | 1        | 2        | 3        | 4 | 5 | 1 B | 0.000000 |  |  |  |  | 2 B | 3.010806 | 0.000000 |  |  |  | 3 B  | 3.365594 | 1.630464 | 0.000000 |  |  | 4 B  | 1.630544 | 3.365689 | 2.879300 | 0.000000 |  | 5 Ru | 2.152051 | 2.155666 | 2.181881 | 2.181874 | 0.000000 | 6 Ru | 2.149818 | 2.146709 | 2.183091 | 2.182776 | 2.721608 | 7 B | 3.987951 | 3.170626 | 1.704791 | 2.914080 | 3.359401 | 8 B | 3.170990 | 3.986102 | 2.911874 | 1.705782 | 2.508393 | 9 B | 4.306285 | 4.305970 | 2.802958 | 2.803383 | 3.585598 | 10 B  | 3.986695 | 3.172904 | 1.705335 | 2.913727 | 2.510649 | 11 B | 3.172822 | 3.987663 | 2.914679 | 1.704629 | 3.359228 |  | 6 | 7 | 8 | 9 | 10 | 6 Ru | 0.000000 |  |  |  |  | 7 B | 2.517504 | 0.000000 |  |  |  | 8 B | 3.362063 | 2.664686 | 0.000000 |  |  | 9 B | 3.592265 | 1.693719 | 1.693393 | 0.000000 |  | 10 B  | 3.362587 | 1.828225 | 1.936401 | 1.692500 | 0.000000 | 11 B | 2.519030 | 1.940602 | 1.828044 | 1.692865 | 2.664425 |
|-------------------------------------------------------------------------------------------------------------------|----------------------------------------------------------------------------------------------------------------------------------------------------------------------------------------------------------------------------------------------------------------------------------------------------------------------------------------------------------------------------------------------------------------------------------------------------------------------------------------------------------------------------------------------------------------------------------------------------------------------------------------------------------------------------------------------------------------------------------------------------------------------------------------------------------------------------------------------------------------------------------------------------------------------------------------------------------------------------------------------------------------------------------------------------------------------------------------------------------------------------------------------------------------------------------------------------------------------------------------------------------------------------------------------------------------------------------------------------------------------------------------------------------------------------------------------------------------------------------------------------------------------------------------------------------------------------------------------------------------------------------------------------------------------------------------------------------------------------------------------------------------------------------------------------------------------------------------------------------------------------------------------------------------------------------------------------------|----------|----------|----------|----------|---|---|-----|----------|--|--|--|--|-----|----------|----------|--|--|--|------|----------|----------|----------|--|--|------|----------|----------|----------|----------|--|------|----------|----------|----------|----------|----------|------|----------|----------|----------|----------|----------|-----|----------|----------|----------|----------|----------|-----|----------|----------|----------|----------|----------|-----|----------|----------|----------|----------|----------|-------|----------|----------|----------|----------|----------|------|----------|----------|----------|----------|----------|--|---|---|---|---|----|------|----------|--|--|--|--|-----|----------|----------|--|--|--|-----|----------|----------|----------|--|--|-----|----------|----------|----------|----------|--|-------|----------|----------|----------|----------|----------|------|----------|----------|----------|----------|----------|
|                                                                                                                   | 1                                                                                                                                                                                                                                                                                                                                                                                                                                                                                                                                                                                                                                                                                                                                                                                                                                                                                                                                                                                                                                                                                                                                                                                                                                                                                                                                                                                                                                                                                                                                                                                                                                                                                                                                                                                                                                                                                                                                                        | 2        | 3        | 4        | 5        |   |   |     |          |  |  |  |  |     |          |          |  |  |  |      |          |          |          |  |  |      |          |          |          |          |  |      |          |          |          |          |          |      |          |          |          |          |          |     |          |          |          |          |          |     |          |          |          |          |          |     |          |          |          |          |          |       |          |          |          |          |          |      |          |          |          |          |          |  |   |   |   |   |    |      |          |  |  |  |  |     |          |          |  |  |  |     |          |          |          |  |  |     |          |          |          |          |  |       |          |          |          |          |          |      |          |          |          |          |          |
| 1 B                                                                                                               | 0.000000                                                                                                                                                                                                                                                                                                                                                                                                                                                                                                                                                                                                                                                                                                                                                                                                                                                                                                                                                                                                                                                                                                                                                                                                                                                                                                                                                                                                                                                                                                                                                                                                                                                                                                                                                                                                                                                                                                                                                 |          |          |          |          |   |   |     |          |  |  |  |  |     |          |          |  |  |  |      |          |          |          |  |  |      |          |          |          |          |  |      |          |          |          |          |          |      |          |          |          |          |          |     |          |          |          |          |          |     |          |          |          |          |          |     |          |          |          |          |          |       |          |          |          |          |          |      |          |          |          |          |          |  |   |   |   |   |    |      |          |  |  |  |  |     |          |          |  |  |  |     |          |          |          |  |  |     |          |          |          |          |  |       |          |          |          |          |          |      |          |          |          |          |          |
| 2 B                                                                                                               | 3.010806                                                                                                                                                                                                                                                                                                                                                                                                                                                                                                                                                                                                                                                                                                                                                                                                                                                                                                                                                                                                                                                                                                                                                                                                                                                                                                                                                                                                                                                                                                                                                                                                                                                                                                                                                                                                                                                                                                                                                 | 0.000000 |          |          |          |   |   |     |          |  |  |  |  |     |          |          |  |  |  |      |          |          |          |  |  |      |          |          |          |          |  |      |          |          |          |          |          |      |          |          |          |          |          |     |          |          |          |          |          |     |          |          |          |          |          |     |          |          |          |          |          |       |          |          |          |          |          |      |          |          |          |          |          |  |   |   |   |   |    |      |          |  |  |  |  |     |          |          |  |  |  |     |          |          |          |  |  |     |          |          |          |          |  |       |          |          |          |          |          |      |          |          |          |          |          |
| 3 B                                                                                                               | 3.365594                                                                                                                                                                                                                                                                                                                                                                                                                                                                                                                                                                                                                                                                                                                                                                                                                                                                                                                                                                                                                                                                                                                                                                                                                                                                                                                                                                                                                                                                                                                                                                                                                                                                                                                                                                                                                                                                                                                                                 | 1.630464 | 0.000000 |          |          |   |   |     |          |  |  |  |  |     |          |          |  |  |  |      |          |          |          |  |  |      |          |          |          |          |  |      |          |          |          |          |          |      |          |          |          |          |          |     |          |          |          |          |          |     |          |          |          |          |          |     |          |          |          |          |          |       |          |          |          |          |          |      |          |          |          |          |          |  |   |   |   |   |    |      |          |  |  |  |  |     |          |          |  |  |  |     |          |          |          |  |  |     |          |          |          |          |  |       |          |          |          |          |          |      |          |          |          |          |          |
| 4 B                                                                                                               | 1.630544                                                                                                                                                                                                                                                                                                                                                                                                                                                                                                                                                                                                                                                                                                                                                                                                                                                                                                                                                                                                                                                                                                                                                                                                                                                                                                                                                                                                                                                                                                                                                                                                                                                                                                                                                                                                                                                                                                                                                 | 3.365689 | 2.879300 | 0.000000 |          |   |   |     |          |  |  |  |  |     |          |          |  |  |  |      |          |          |          |  |  |      |          |          |          |          |  |      |          |          |          |          |          |      |          |          |          |          |          |     |          |          |          |          |          |     |          |          |          |          |          |     |          |          |          |          |          |       |          |          |          |          |          |      |          |          |          |          |          |  |   |   |   |   |    |      |          |  |  |  |  |     |          |          |  |  |  |     |          |          |          |  |  |     |          |          |          |          |  |       |          |          |          |          |          |      |          |          |          |          |          |
| 5 Ru                                                                                                              | 2.152051                                                                                                                                                                                                                                                                                                                                                                                                                                                                                                                                                                                                                                                                                                                                                                                                                                                                                                                                                                                                                                                                                                                                                                                                                                                                                                                                                                                                                                                                                                                                                                                                                                                                                                                                                                                                                                                                                                                                                 | 2.155666 | 2.181881 | 2.181874 | 0.000000 |   |   |     |          |  |  |  |  |     |          |          |  |  |  |      |          |          |          |  |  |      |          |          |          |          |  |      |          |          |          |          |          |      |          |          |          |          |          |     |          |          |          |          |          |     |          |          |          |          |          |     |          |          |          |          |          |       |          |          |          |          |          |      |          |          |          |          |          |  |   |   |   |   |    |      |          |  |  |  |  |     |          |          |  |  |  |     |          |          |          |  |  |     |          |          |          |          |  |       |          |          |          |          |          |      |          |          |          |          |          |
| 6 Ru                                                                                                              | 2.149818                                                                                                                                                                                                                                                                                                                                                                                                                                                                                                                                                                                                                                                                                                                                                                                                                                                                                                                                                                                                                                                                                                                                                                                                                                                                                                                                                                                                                                                                                                                                                                                                                                                                                                                                                                                                                                                                                                                                                 | 2.146709 | 2.183091 | 2.182776 | 2.721608 |   |   |     |          |  |  |  |  |     |          |          |  |  |  |      |          |          |          |  |  |      |          |          |          |          |  |      |          |          |          |          |          |      |          |          |          |          |          |     |          |          |          |          |          |     |          |          |          |          |          |     |          |          |          |          |          |       |          |          |          |          |          |      |          |          |          |          |          |  |   |   |   |   |    |      |          |  |  |  |  |     |          |          |  |  |  |     |          |          |          |  |  |     |          |          |          |          |  |       |          |          |          |          |          |      |          |          |          |          |          |
| 7 B                                                                                                               | 3.987951                                                                                                                                                                                                                                                                                                                                                                                                                                                                                                                                                                                                                                                                                                                                                                                                                                                                                                                                                                                                                                                                                                                                                                                                                                                                                                                                                                                                                                                                                                                                                                                                                                                                                                                                                                                                                                                                                                                                                 | 3.170626 | 1.704791 | 2.914080 | 3.359401 |   |   |     |          |  |  |  |  |     |          |          |  |  |  |      |          |          |          |  |  |      |          |          |          |          |  |      |          |          |          |          |          |      |          |          |          |          |          |     |          |          |          |          |          |     |          |          |          |          |          |     |          |          |          |          |          |       |          |          |          |          |          |      |          |          |          |          |          |  |   |   |   |   |    |      |          |  |  |  |  |     |          |          |  |  |  |     |          |          |          |  |  |     |          |          |          |          |  |       |          |          |          |          |          |      |          |          |          |          |          |
| 8 B                                                                                                               | 3.170990                                                                                                                                                                                                                                                                                                                                                                                                                                                                                                                                                                                                                                                                                                                                                                                                                                                                                                                                                                                                                                                                                                                                                                                                                                                                                                                                                                                                                                                                                                                                                                                                                                                                                                                                                                                                                                                                                                                                                 | 3.986102 | 2.911874 | 1.705782 | 2.508393 |   |   |     |          |  |  |  |  |     |          |          |  |  |  |      |          |          |          |  |  |      |          |          |          |          |  |      |          |          |          |          |          |      |          |          |          |          |          |     |          |          |          |          |          |     |          |          |          |          |          |     |          |          |          |          |          |       |          |          |          |          |          |      |          |          |          |          |          |  |   |   |   |   |    |      |          |  |  |  |  |     |          |          |  |  |  |     |          |          |          |  |  |     |          |          |          |          |  |       |          |          |          |          |          |      |          |          |          |          |          |
| 9 B                                                                                                               | 4.306285                                                                                                                                                                                                                                                                                                                                                                                                                                                                                                                                                                                                                                                                                                                                                                                                                                                                                                                                                                                                                                                                                                                                                                                                                                                                                                                                                                                                                                                                                                                                                                                                                                                                                                                                                                                                                                                                                                                                                 | 4.305970 | 2.802958 | 2.803383 | 3.585598 |   |   |     |          |  |  |  |  |     |          |          |  |  |  |      |          |          |          |  |  |      |          |          |          |          |  |      |          |          |          |          |          |      |          |          |          |          |          |     |          |          |          |          |          |     |          |          |          |          |          |     |          |          |          |          |          |       |          |          |          |          |          |      |          |          |          |          |          |  |   |   |   |   |    |      |          |  |  |  |  |     |          |          |  |  |  |     |          |          |          |  |  |     |          |          |          |          |  |       |          |          |          |          |          |      |          |          |          |          |          |
| 10 B                                                                                                              | 3.986695                                                                                                                                                                                                                                                                                                                                                                                                                                                                                                                                                                                                                                                                                                                                                                                                                                                                                                                                                                                                                                                                                                                                                                                                                                                                                                                                                                                                                                                                                                                                                                                                                                                                                                                                                                                                                                                                                                                                                 | 3.172904 | 1.705335 | 2.913727 | 2.510649 |   |   |     |          |  |  |  |  |     |          |          |  |  |  |      |          |          |          |  |  |      |          |          |          |          |  |      |          |          |          |          |          |      |          |          |          |          |          |     |          |          |          |          |          |     |          |          |          |          |          |     |          |          |          |          |          |       |          |          |          |          |          |      |          |          |          |          |          |  |   |   |   |   |    |      |          |  |  |  |  |     |          |          |  |  |  |     |          |          |          |  |  |     |          |          |          |          |  |       |          |          |          |          |          |      |          |          |          |          |          |
| 11 B                                                                                                              | 3.172822                                                                                                                                                                                                                                                                                                                                                                                                                                                                                                                                                                                                                                                                                                                                                                                                                                                                                                                                                                                                                                                                                                                                                                                                                                                                                                                                                                                                                                                                                                                                                                                                                                                                                                                                                                                                                                                                                                                                                 | 3.987663 | 2.914679 | 1.704629 | 3.359228 |   |   |     |          |  |  |  |  |     |          |          |  |  |  |      |          |          |          |  |  |      |          |          |          |          |  |      |          |          |          |          |          |      |          |          |          |          |          |     |          |          |          |          |          |     |          |          |          |          |          |     |          |          |          |          |          |       |          |          |          |          |          |      |          |          |          |          |          |  |   |   |   |   |    |      |          |  |  |  |  |     |          |          |  |  |  |     |          |          |          |  |  |     |          |          |          |          |  |       |          |          |          |          |          |      |          |          |          |          |          |
|                                                                                                                   | 6                                                                                                                                                                                                                                                                                                                                                                                                                                                                                                                                                                                                                                                                                                                                                                                                                                                                                                                                                                                                                                                                                                                                                                                                                                                                                                                                                                                                                                                                                                                                                                                                                                                                                                                                                                                                                                                                                                                                                        | 7        | 8        | 9        | 10       |   |   |     |          |  |  |  |  |     |          |          |  |  |  |      |          |          |          |  |  |      |          |          |          |          |  |      |          |          |          |          |          |      |          |          |          |          |          |     |          |          |          |          |          |     |          |          |          |          |          |     |          |          |          |          |          |       |          |          |          |          |          |      |          |          |          |          |          |  |   |   |   |   |    |      |          |  |  |  |  |     |          |          |  |  |  |     |          |          |          |  |  |     |          |          |          |          |  |       |          |          |          |          |          |      |          |          |          |          |          |
| 6 Ru                                                                                                              | 0.000000                                                                                                                                                                                                                                                                                                                                                                                                                                                                                                                                                                                                                                                                                                                                                                                                                                                                                                                                                                                                                                                                                                                                                                                                                                                                                                                                                                                                                                                                                                                                                                                                                                                                                                                                                                                                                                                                                                                                                 |          |          |          |          |   |   |     |          |  |  |  |  |     |          |          |  |  |  |      |          |          |          |  |  |      |          |          |          |          |  |      |          |          |          |          |          |      |          |          |          |          |          |     |          |          |          |          |          |     |          |          |          |          |          |     |          |          |          |          |          |       |          |          |          |          |          |      |          |          |          |          |          |  |   |   |   |   |    |      |          |  |  |  |  |     |          |          |  |  |  |     |          |          |          |  |  |     |          |          |          |          |  |       |          |          |          |          |          |      |          |          |          |          |          |
| 7 B                                                                                                               | 2.517504                                                                                                                                                                                                                                                                                                                                                                                                                                                                                                                                                                                                                                                                                                                                                                                                                                                                                                                                                                                                                                                                                                                                                                                                                                                                                                                                                                                                                                                                                                                                                                                                                                                                                                                                                                                                                                                                                                                                                 | 0.000000 |          |          |          |   |   |     |          |  |  |  |  |     |          |          |  |  |  |      |          |          |          |  |  |      |          |          |          |          |  |      |          |          |          |          |          |      |          |          |          |          |          |     |          |          |          |          |          |     |          |          |          |          |          |     |          |          |          |          |          |       |          |          |          |          |          |      |          |          |          |          |          |  |   |   |   |   |    |      |          |  |  |  |  |     |          |          |  |  |  |     |          |          |          |  |  |     |          |          |          |          |  |       |          |          |          |          |          |      |          |          |          |          |          |
| 8 B                                                                                                               | 3.362063                                                                                                                                                                                                                                                                                                                                                                                                                                                                                                                                                                                                                                                                                                                                                                                                                                                                                                                                                                                                                                                                                                                                                                                                                                                                                                                                                                                                                                                                                                                                                                                                                                                                                                                                                                                                                                                                                                                                                 | 2.664686 | 0.000000 |          |          |   |   |     |          |  |  |  |  |     |          |          |  |  |  |      |          |          |          |  |  |      |          |          |          |          |  |      |          |          |          |          |          |      |          |          |          |          |          |     |          |          |          |          |          |     |          |          |          |          |          |     |          |          |          |          |          |       |          |          |          |          |          |      |          |          |          |          |          |  |   |   |   |   |    |      |          |  |  |  |  |     |          |          |  |  |  |     |          |          |          |  |  |     |          |          |          |          |  |       |          |          |          |          |          |      |          |          |          |          |          |
| 9 B                                                                                                               | 3.592265                                                                                                                                                                                                                                                                                                                                                                                                                                                                                                                                                                                                                                                                                                                                                                                                                                                                                                                                                                                                                                                                                                                                                                                                                                                                                                                                                                                                                                                                                                                                                                                                                                                                                                                                                                                                                                                                                                                                                 | 1.693719 | 1.693393 | 0.000000 |          |   |   |     |          |  |  |  |  |     |          |          |  |  |  |      |          |          |          |  |  |      |          |          |          |          |  |      |          |          |          |          |          |      |          |          |          |          |          |     |          |          |          |          |          |     |          |          |          |          |          |     |          |          |          |          |          |       |          |          |          |          |          |      |          |          |          |          |          |  |   |   |   |   |    |      |          |  |  |  |  |     |          |          |  |  |  |     |          |          |          |  |  |     |          |          |          |          |  |       |          |          |          |          |          |      |          |          |          |          |          |
| 10 B                                                                                                              | 3.362587                                                                                                                                                                                                                                                                                                                                                                                                                                                                                                                                                                                                                                                                                                                                                                                                                                                                                                                                                                                                                                                                                                                                                                                                                                                                                                                                                                                                                                                                                                                                                                                                                                                                                                                                                                                                                                                                                                                                                 | 1.828225 | 1.936401 | 1.692500 | 0.000000 |   |   |     |          |  |  |  |  |     |          |          |  |  |  |      |          |          |          |  |  |      |          |          |          |          |  |      |          |          |          |          |          |      |          |          |          |          |          |     |          |          |          |          |          |     |          |          |          |          |          |     |          |          |          |          |          |       |          |          |          |          |          |      |          |          |          |          |          |  |   |   |   |   |    |      |          |  |  |  |  |     |          |          |  |  |  |     |          |          |          |  |  |     |          |          |          |          |  |       |          |          |          |          |          |      |          |          |          |          |          |
| 11 B                                                                                                              | 2.519030                                                                                                                                                                                                                                                                                                                                                                                                                                                                                                                                                                                                                                                                                                                                                                                                                                                                                                                                                                                                                                                                                                                                                                                                                                                                                                                                                                                                                                                                                                                                                                                                                                                                                                                                                                                                                                                                                                                                                 | 1.940602 | 1.828044 | 1.692865 | 2.664425 |   |   |     |          |  |  |  |  |     |          |          |  |  |  |      |          |          |          |  |  |      |          |          |          |          |  |      |          |          |          |          |          |      |          |          |          |          |          |     |          |          |          |          |          |     |          |          |          |          |          |     |          |          |          |          |          |       |          |          |          |          |          |      |          |          |          |          |          |  |   |   |   |   |    |      |          |  |  |  |  |     |          |          |  |  |  |     |          |          |          |  |  |     |          |          |          |          |  |       |          |          |          |          |          |      |          |          |          |          |          |
|  <p>5. -806.15957360 +16.4</p>  | <table border="1"> <thead> <tr> <th></th> <th>1</th> <th>2</th> <th>3</th> <th>4</th> <th>5</th> </tr> </thead> <tbody> <tr><td>1 B</td><td>0.000000</td><td></td><td></td><td></td><td></td></tr> <tr><td>2 B</td><td>1.797583</td><td>0.000000</td><td></td><td></td><td></td></tr> <tr><td>3 Ru</td><td>3.290158</td><td>2.266520</td><td>0.000000</td><td></td><td></td></tr> <tr><td>4 Ru</td><td>2.309743</td><td>3.127202</td><td>2.847226</td><td>0.000000</td><td></td></tr> <tr><td>5 B</td><td>1.761230</td><td>2.942147</td><td>3.822973</td><td>2.042238</td><td>0.000000</td></tr> <tr><td>6 B</td><td>2.853783</td><td>1.737610</td><td>2.265852</td><td>3.378348</td><td>2.971044</td></tr> <tr><td>7 B</td><td>3.880098</td><td>3.063882</td><td>2.078294</td><td>3.279933</td><td>3.534036</td></tr> <tr><td>8 B</td><td>2.847413</td><td>2.895034</td><td>2.962146</td><td>2.414099</td><td>1.866009</td></tr> <tr><td>9 B</td><td>3.623657</td><td>3.521968</td><td>2.235209</td><td>1.997723</td><td>3.083616</td></tr> <tr><td>10 B</td><td>1.777796</td><td>1.800810</td><td>2.121285</td><td>2.124595</td><td>3.006562</td></tr> <tr><td>11 B</td><td>1.760370</td><td>1.817335</td><td>3.353893</td><td>3.062615</td><td>1.755280</td></tr> <tr> <td></td> <td>6</td> <td>7</td> <td>8</td> <td>9</td> <td>10</td> </tr> <tr><td>6 B</td><td>0.000000</td><td></td><td></td><td></td><td></td></tr> <tr><td>7 B</td><td>1.699630</td><td>0.000000</td><td></td><td></td><td></td></tr> <tr><td>8 B</td><td>1.899008</td><td>1.829263</td><td>0.000000</td><td></td><td></td></tr> <tr><td>9 B</td><td>2.866106</td><td>1.791398</td><td>1.941928</td><td>0.000000</td><td></td></tr> <tr><td>10 B</td><td>3.011462</td><td>3.589777</td><td>3.332483</td><td>3.138252</td><td>0.000000</td></tr> <tr><td>11 B</td><td>1.725047</td><td>3.036027</td><td>1.939866</td><td>3.480400</td><td>2.931275</td></tr> </tbody> </table>  |          | 1        | 2        | 3        | 4 | 5 | 1 B | 0.000000 |  |  |  |  | 2 B | 1.797583 | 0.000000 |  |  |  | 3 Ru | 3.290158 | 2.266520 | 0.000000 |  |  | 4 Ru | 2.309743 | 3.127202 | 2.847226 | 0.000000 |  | 5 B  | 1.761230 | 2.942147 | 3.822973 | 2.042238 | 0.000000 | 6 B  | 2.853783 | 1.737610 | 2.265852 | 3.378348 | 2.971044 | 7 B | 3.880098 | 3.063882 | 2.078294 | 3.279933 | 3.534036 | 8 B | 2.847413 | 2.895034 | 2.962146 | 2.414099 | 1.866009 | 9 B | 3.623657 | 3.521968 | 2.235209 | 1.997723 | 3.083616 | 10 B  | 1.777796 | 1.800810 | 2.121285 | 2.124595 | 3.006562 | 11 B | 1.760370 | 1.817335 | 3.353893 | 3.062615 | 1.755280 |  | 6 | 7 | 8 | 9 | 10 | 6 B  | 0.000000 |  |  |  |  | 7 B | 1.699630 | 0.000000 |  |  |  | 8 B | 1.899008 | 1.829263 | 0.000000 |  |  | 9 B | 2.866106 | 1.791398 | 1.941928 | 0.000000 |  | 10 B  | 3.011462 | 3.589777 | 3.332483 | 3.138252 | 0.000000 | 11 B | 1.725047 | 3.036027 | 1.939866 | 3.480400 | 2.931275 |
|                                                                                                                   | 1                                                                                                                                                                                                                                                                                                                                                                                                                                                                                                                                                                                                                                                                                                                                                                                                                                                                                                                                                                                                                                                                                                                                                                                                                                                                                                                                                                                                                                                                                                                                                                                                                                                                                                                                                                                                                                                                                                                                                        | 2        | 3        | 4        | 5        |   |   |     |          |  |  |  |  |     |          |          |  |  |  |      |          |          |          |  |  |      |          |          |          |          |  |      |          |          |          |          |          |      |          |          |          |          |          |     |          |          |          |          |          |     |          |          |          |          |          |     |          |          |          |          |          |       |          |          |          |          |          |      |          |          |          |          |          |  |   |   |   |   |    |      |          |  |  |  |  |     |          |          |  |  |  |     |          |          |          |  |  |     |          |          |          |          |  |       |          |          |          |          |          |      |          |          |          |          |          |
| 1 B                                                                                                               | 0.000000                                                                                                                                                                                                                                                                                                                                                                                                                                                                                                                                                                                                                                                                                                                                                                                                                                                                                                                                                                                                                                                                                                                                                                                                                                                                                                                                                                                                                                                                                                                                                                                                                                                                                                                                                                                                                                                                                                                                                 |          |          |          |          |   |   |     |          |  |  |  |  |     |          |          |  |  |  |      |          |          |          |  |  |      |          |          |          |          |  |      |          |          |          |          |          |      |          |          |          |          |          |     |          |          |          |          |          |     |          |          |          |          |          |     |          |          |          |          |          |       |          |          |          |          |          |      |          |          |          |          |          |  |   |   |   |   |    |      |          |  |  |  |  |     |          |          |  |  |  |     |          |          |          |  |  |     |          |          |          |          |  |       |          |          |          |          |          |      |          |          |          |          |          |
| 2 B                                                                                                               | 1.797583                                                                                                                                                                                                                                                                                                                                                                                                                                                                                                                                                                                                                                                                                                                                                                                                                                                                                                                                                                                                                                                                                                                                                                                                                                                                                                                                                                                                                                                                                                                                                                                                                                                                                                                                                                                                                                                                                                                                                 | 0.000000 |          |          |          |   |   |     |          |  |  |  |  |     |          |          |  |  |  |      |          |          |          |  |  |      |          |          |          |          |  |      |          |          |          |          |          |      |          |          |          |          |          |     |          |          |          |          |          |     |          |          |          |          |          |     |          |          |          |          |          |       |          |          |          |          |          |      |          |          |          |          |          |  |   |   |   |   |    |      |          |  |  |  |  |     |          |          |  |  |  |     |          |          |          |  |  |     |          |          |          |          |  |       |          |          |          |          |          |      |          |          |          |          |          |
| 3 Ru                                                                                                              | 3.290158                                                                                                                                                                                                                                                                                                                                                                                                                                                                                                                                                                                                                                                                                                                                                                                                                                                                                                                                                                                                                                                                                                                                                                                                                                                                                                                                                                                                                                                                                                                                                                                                                                                                                                                                                                                                                                                                                                                                                 | 2.266520 | 0.000000 |          |          |   |   |     |          |  |  |  |  |     |          |          |  |  |  |      |          |          |          |  |  |      |          |          |          |          |  |      |          |          |          |          |          |      |          |          |          |          |          |     |          |          |          |          |          |     |          |          |          |          |          |     |          |          |          |          |          |       |          |          |          |          |          |      |          |          |          |          |          |  |   |   |   |   |    |      |          |  |  |  |  |     |          |          |  |  |  |     |          |          |          |  |  |     |          |          |          |          |  |       |          |          |          |          |          |      |          |          |          |          |          |
| 4 Ru                                                                                                              | 2.309743                                                                                                                                                                                                                                                                                                                                                                                                                                                                                                                                                                                                                                                                                                                                                                                                                                                                                                                                                                                                                                                                                                                                                                                                                                                                                                                                                                                                                                                                                                                                                                                                                                                                                                                                                                                                                                                                                                                                                 | 3.127202 | 2.847226 | 0.000000 |          |   |   |     |          |  |  |  |  |     |          |          |  |  |  |      |          |          |          |  |  |      |          |          |          |          |  |      |          |          |          |          |          |      |          |          |          |          |          |     |          |          |          |          |          |     |          |          |          |          |          |     |          |          |          |          |          |       |          |          |          |          |          |      |          |          |          |          |          |  |   |   |   |   |    |      |          |  |  |  |  |     |          |          |  |  |  |     |          |          |          |  |  |     |          |          |          |          |  |       |          |          |          |          |          |      |          |          |          |          |          |
| 5 B                                                                                                               | 1.761230                                                                                                                                                                                                                                                                                                                                                                                                                                                                                                                                                                                                                                                                                                                                                                                                                                                                                                                                                                                                                                                                                                                                                                                                                                                                                                                                                                                                                                                                                                                                                                                                                                                                                                                                                                                                                                                                                                                                                 | 2.942147 | 3.822973 | 2.042238 | 0.000000 |   |   |     |          |  |  |  |  |     |          |          |  |  |  |      |          |          |          |  |  |      |          |          |          |          |  |      |          |          |          |          |          |      |          |          |          |          |          |     |          |          |          |          |          |     |          |          |          |          |          |     |          |          |          |          |          |       |          |          |          |          |          |      |          |          |          |          |          |  |   |   |   |   |    |      |          |  |  |  |  |     |          |          |  |  |  |     |          |          |          |  |  |     |          |          |          |          |  |       |          |          |          |          |          |      |          |          |          |          |          |
| 6 B                                                                                                               | 2.853783                                                                                                                                                                                                                                                                                                                                                                                                                                                                                                                                                                                                                                                                                                                                                                                                                                                                                                                                                                                                                                                                                                                                                                                                                                                                                                                                                                                                                                                                                                                                                                                                                                                                                                                                                                                                                                                                                                                                                 | 1.737610 | 2.265852 | 3.378348 | 2.971044 |   |   |     |          |  |  |  |  |     |          |          |  |  |  |      |          |          |          |  |  |      |          |          |          |          |  |      |          |          |          |          |          |      |          |          |          |          |          |     |          |          |          |          |          |     |          |          |          |          |          |     |          |          |          |          |          |       |          |          |          |          |          |      |          |          |          |          |          |  |   |   |   |   |    |      |          |  |  |  |  |     |          |          |  |  |  |     |          |          |          |  |  |     |          |          |          |          |  |       |          |          |          |          |          |      |          |          |          |          |          |
| 7 B                                                                                                               | 3.880098                                                                                                                                                                                                                                                                                                                                                                                                                                                                                                                                                                                                                                                                                                                                                                                                                                                                                                                                                                                                                                                                                                                                                                                                                                                                                                                                                                                                                                                                                                                                                                                                                                                                                                                                                                                                                                                                                                                                                 | 3.063882 | 2.078294 | 3.279933 | 3.534036 |   |   |     |          |  |  |  |  |     |          |          |  |  |  |      |          |          |          |  |  |      |          |          |          |          |  |      |          |          |          |          |          |      |          |          |          |          |          |     |          |          |          |          |          |     |          |          |          |          |          |     |          |          |          |          |          |       |          |          |          |          |          |      |          |          |          |          |          |  |   |   |   |   |    |      |          |  |  |  |  |     |          |          |  |  |  |     |          |          |          |  |  |     |          |          |          |          |  |       |          |          |          |          |          |      |          |          |          |          |          |
| 8 B                                                                                                               | 2.847413                                                                                                                                                                                                                                                                                                                                                                                                                                                                                                                                                                                                                                                                                                                                                                                                                                                                                                                                                                                                                                                                                                                                                                                                                                                                                                                                                                                                                                                                                                                                                                                                                                                                                                                                                                                                                                                                                                                                                 | 2.895034 | 2.962146 | 2.414099 | 1.866009 |   |   |     |          |  |  |  |  |     |          |          |  |  |  |      |          |          |          |  |  |      |          |          |          |          |  |      |          |          |          |          |          |      |          |          |          |          |          |     |          |          |          |          |          |     |          |          |          |          |          |     |          |          |          |          |          |       |          |          |          |          |          |      |          |          |          |          |          |  |   |   |   |   |    |      |          |  |  |  |  |     |          |          |  |  |  |     |          |          |          |  |  |     |          |          |          |          |  |       |          |          |          |          |          |      |          |          |          |          |          |
| 9 B                                                                                                               | 3.623657                                                                                                                                                                                                                                                                                                                                                                                                                                                                                                                                                                                                                                                                                                                                                                                                                                                                                                                                                                                                                                                                                                                                                                                                                                                                                                                                                                                                                                                                                                                                                                                                                                                                                                                                                                                                                                                                                                                                                 | 3.521968 | 2.235209 | 1.997723 | 3.083616 |   |   |     |          |  |  |  |  |     |          |          |  |  |  |      |          |          |          |  |  |      |          |          |          |          |  |      |          |          |          |          |          |      |          |          |          |          |          |     |          |          |          |          |          |     |          |          |          |          |          |     |          |          |          |          |          |       |          |          |          |          |          |      |          |          |          |          |          |  |   |   |   |   |    |      |          |  |  |  |  |     |          |          |  |  |  |     |          |          |          |  |  |     |          |          |          |          |  |       |          |          |          |          |          |      |          |          |          |          |          |
| 10 B                                                                                                              | 1.777796                                                                                                                                                                                                                                                                                                                                                                                                                                                                                                                                                                                                                                                                                                                                                                                                                                                                                                                                                                                                                                                                                                                                                                                                                                                                                                                                                                                                                                                                                                                                                                                                                                                                                                                                                                                                                                                                                                                                                 | 1.800810 | 2.121285 | 2.124595 | 3.006562 |   |   |     |          |  |  |  |  |     |          |          |  |  |  |      |          |          |          |  |  |      |          |          |          |          |  |      |          |          |          |          |          |      |          |          |          |          |          |     |          |          |          |          |          |     |          |          |          |          |          |     |          |          |          |          |          |       |          |          |          |          |          |      |          |          |          |          |          |  |   |   |   |   |    |      |          |  |  |  |  |     |          |          |  |  |  |     |          |          |          |  |  |     |          |          |          |          |  |       |          |          |          |          |          |      |          |          |          |          |          |
| 11 B                                                                                                              | 1.760370                                                                                                                                                                                                                                                                                                                                                                                                                                                                                                                                                                                                                                                                                                                                                                                                                                                                                                                                                                                                                                                                                                                                                                                                                                                                                                                                                                                                                                                                                                                                                                                                                                                                                                                                                                                                                                                                                                                                                 | 1.817335 | 3.353893 | 3.062615 | 1.755280 |   |   |     |          |  |  |  |  |     |          |          |  |  |  |      |          |          |          |  |  |      |          |          |          |          |  |      |          |          |          |          |          |      |          |          |          |          |          |     |          |          |          |          |          |     |          |          |          |          |          |     |          |          |          |          |          |       |          |          |          |          |          |      |          |          |          |          |          |  |   |   |   |   |    |      |          |  |  |  |  |     |          |          |  |  |  |     |          |          |          |  |  |     |          |          |          |          |  |       |          |          |          |          |          |      |          |          |          |          |          |
|                                                                                                                   | 6                                                                                                                                                                                                                                                                                                                                                                                                                                                                                                                                                                                                                                                                                                                                                                                                                                                                                                                                                                                                                                                                                                                                                                                                                                                                                                                                                                                                                                                                                                                                                                                                                                                                                                                                                                                                                                                                                                                                                        | 7        | 8        | 9        | 10       |   |   |     |          |  |  |  |  |     |          |          |  |  |  |      |          |          |          |  |  |      |          |          |          |          |  |      |          |          |          |          |          |      |          |          |          |          |          |     |          |          |          |          |          |     |          |          |          |          |          |     |          |          |          |          |          |       |          |          |          |          |          |      |          |          |          |          |          |  |   |   |   |   |    |      |          |  |  |  |  |     |          |          |  |  |  |     |          |          |          |  |  |     |          |          |          |          |  |       |          |          |          |          |          |      |          |          |          |          |          |
| 6 B                                                                                                               | 0.000000                                                                                                                                                                                                                                                                                                                                                                                                                                                                                                                                                                                                                                                                                                                                                                                                                                                                                                                                                                                                                                                                                                                                                                                                                                                                                                                                                                                                                                                                                                                                                                                                                                                                                                                                                                                                                                                                                                                                                 |          |          |          |          |   |   |     |          |  |  |  |  |     |          |          |  |  |  |      |          |          |          |  |  |      |          |          |          |          |  |      |          |          |          |          |          |      |          |          |          |          |          |     |          |          |          |          |          |     |          |          |          |          |          |     |          |          |          |          |          |       |          |          |          |          |          |      |          |          |          |          |          |  |   |   |   |   |    |      |          |  |  |  |  |     |          |          |  |  |  |     |          |          |          |  |  |     |          |          |          |          |  |       |          |          |          |          |          |      |          |          |          |          |          |
| 7 B                                                                                                               | 1.699630                                                                                                                                                                                                                                                                                                                                                                                                                                                                                                                                                                                                                                                                                                                                                                                                                                                                                                                                                                                                                                                                                                                                                                                                                                                                                                                                                                                                                                                                                                                                                                                                                                                                                                                                                                                                                                                                                                                                                 | 0.000000 |          |          |          |   |   |     |          |  |  |  |  |     |          |          |  |  |  |      |          |          |          |  |  |      |          |          |          |          |  |      |          |          |          |          |          |      |          |          |          |          |          |     |          |          |          |          |          |     |          |          |          |          |          |     |          |          |          |          |          |       |          |          |          |          |          |      |          |          |          |          |          |  |   |   |   |   |    |      |          |  |  |  |  |     |          |          |  |  |  |     |          |          |          |  |  |     |          |          |          |          |  |       |          |          |          |          |          |      |          |          |          |          |          |
| 8 B                                                                                                               | 1.899008                                                                                                                                                                                                                                                                                                                                                                                                                                                                                                                                                                                                                                                                                                                                                                                                                                                                                                                                                                                                                                                                                                                                                                                                                                                                                                                                                                                                                                                                                                                                                                                                                                                                                                                                                                                                                                                                                                                                                 | 1.829263 | 0.000000 |          |          |   |   |     |          |  |  |  |  |     |          |          |  |  |  |      |          |          |          |  |  |      |          |          |          |          |  |      |          |          |          |          |          |      |          |          |          |          |          |     |          |          |          |          |          |     |          |          |          |          |          |     |          |          |          |          |          |       |          |          |          |          |          |      |          |          |          |          |          |  |   |   |   |   |    |      |          |  |  |  |  |     |          |          |  |  |  |     |          |          |          |  |  |     |          |          |          |          |  |       |          |          |          |          |          |      |          |          |          |          |          |
| 9 B                                                                                                               | 2.866106                                                                                                                                                                                                                                                                                                                                                                                                                                                                                                                                                                                                                                                                                                                                                                                                                                                                                                                                                                                                                                                                                                                                                                                                                                                                                                                                                                                                                                                                                                                                                                                                                                                                                                                                                                                                                                                                                                                                                 | 1.791398 | 1.941928 | 0.000000 |          |   |   |     |          |  |  |  |  |     |          |          |  |  |  |      |          |          |          |  |  |      |          |          |          |          |  |      |          |          |          |          |          |      |          |          |          |          |          |     |          |          |          |          |          |     |          |          |          |          |          |     |          |          |          |          |          |       |          |          |          |          |          |      |          |          |          |          |          |  |   |   |   |   |    |      |          |  |  |  |  |     |          |          |  |  |  |     |          |          |          |  |  |     |          |          |          |          |  |       |          |          |          |          |          |      |          |          |          |          |          |
| 10 B                                                                                                              | 3.011462                                                                                                                                                                                                                                                                                                                                                                                                                                                                                                                                                                                                                                                                                                                                                                                                                                                                                                                                                                                                                                                                                                                                                                                                                                                                                                                                                                                                                                                                                                                                                                                                                                                                                                                                                                                                                                                                                                                                                 | 3.589777 | 3.332483 | 3.138252 | 0.000000 |   |   |     |          |  |  |  |  |     |          |          |  |  |  |      |          |          |          |  |  |      |          |          |          |          |  |      |          |          |          |          |          |      |          |          |          |          |          |     |          |          |          |          |          |     |          |          |          |          |          |     |          |          |          |          |          |       |          |          |          |          |          |      |          |          |          |          |          |  |   |   |   |   |    |      |          |  |  |  |  |     |          |          |  |  |  |     |          |          |          |  |  |     |          |          |          |          |  |       |          |          |          |          |          |      |          |          |          |          |          |
| 11 B                                                                                                              | 1.725047                                                                                                                                                                                                                                                                                                                                                                                                                                                                                                                                                                                                                                                                                                                                                                                                                                                                                                                                                                                                                                                                                                                                                                                                                                                                                                                                                                                                                                                                                                                                                                                                                                                                                                                                                                                                                                                                                                                                                 | 3.036027 | 1.939866 | 3.480400 | 2.931275 |   |   |     |          |  |  |  |  |     |          |          |  |  |  |      |          |          |          |  |  |      |          |          |          |          |  |      |          |          |          |          |          |      |          |          |          |          |          |     |          |          |          |          |          |     |          |          |          |          |          |     |          |          |          |          |          |       |          |          |          |          |          |      |          |          |          |          |          |  |   |   |   |   |    |      |          |  |  |  |  |     |          |          |  |  |  |     |          |          |          |  |  |     |          |          |          |          |  |       |          |          |          |          |          |      |          |          |          |          |          |
|  <p>6. -806.15798640 +17.4</p> | <table border="1"> <thead> <tr> <th></th> <th>1</th> <th>2</th> <th>3</th> <th>4</th> <th>5</th> </tr> </thead> <tbody> <tr><td>1 B</td><td>0.000000</td><td></td><td></td><td></td><td></td></tr> <tr><td>2 B</td><td>2.997481</td><td>0.000000</td><td></td><td></td><td></td></tr> <tr><td>3 B</td><td>3.044492</td><td>3.103729</td><td>0.000000</td><td></td><td></td></tr> <tr><td>4 Ru</td><td>2.146052</td><td>3.466356</td><td>3.085585</td><td>0.000000</td><td></td></tr> <tr><td>5 B</td><td>3.044492</td><td>1.848432</td><td>2.991248</td><td>2.243617</td><td>0.000000</td></tr> <tr><td>6 B</td><td>2.997481</td><td>4.046807</td><td>1.848432</td><td>2.040024</td><td>3.103729</td></tr> <tr><td>7 B</td><td>3.405072</td><td>2.957624</td><td>1.925337</td><td>2.269128</td><td>1.752535</td></tr> <tr><td>8 B</td><td>1.749330</td><td>1.745664</td><td>3.344956</td><td>2.221806</td><td>1.769055</td></tr> <tr><td>9 B</td><td>1.749323</td><td>3.524184</td><td>1.769086</td><td>2.354650</td><td>3.344932</td></tr> <tr><td>10 Ru</td><td>2.146052</td><td>2.040024</td><td>2.243617</td><td>3.497571</td><td>3.085585</td></tr> <tr><td>11 B</td><td>3.405081</td><td>1.806986</td><td>1.752628</td><td>3.295092</td><td>1.925283</td></tr> <tr> <td></td> <td>6</td> <td>7</td> <td>8</td> <td>9</td> <td>10</td> </tr> <tr><td>6 B</td><td>0.000000</td><td></td><td></td><td></td><td></td></tr> <tr><td>7 B</td><td>1.807065</td><td>0.000000</td><td></td><td></td><td></td></tr> <tr><td>8 B</td><td>3.524157</td><td>2.978544</td><td>0.000000</td><td></td><td></td></tr> <tr><td>9 B</td><td>1.745595</td><td>2.755059</td><td>2.905105</td><td>0.000000</td><td></td></tr> <tr><td>10 Ru</td><td>3.466356</td><td>3.295082</td><td>2.354729</td><td>2.221879</td><td>0.000000</td></tr> <tr><td>11 B</td><td>2.957692</td><td>1.719116</td><td>2.755051</td><td>2.978626</td><td>2.269139</td></tr> </tbody> </table> |          | 1        | 2        | 3        | 4 | 5 | 1 B | 0.000000 |  |  |  |  | 2 B | 2.997481 | 0.000000 |  |  |  | 3 B  | 3.044492 | 3.103729 | 0.000000 |  |  | 4 Ru | 2.146052 | 3.466356 | 3.085585 | 0.000000 |  | 5 B  | 3.044492 | 1.848432 | 2.991248 | 2.243617 | 0.000000 | 6 B  | 2.997481 | 4.046807 | 1.848432 | 2.040024 | 3.103729 | 7 B | 3.405072 | 2.957624 | 1.925337 | 2.269128 | 1.752535 | 8 B | 1.749330 | 1.745664 | 3.344956 | 2.221806 | 1.769055 | 9 B | 1.749323 | 3.524184 | 1.769086 | 2.354650 | 3.344932 | 10 Ru | 2.146052 | 2.040024 | 2.243617 | 3.497571 | 3.085585 | 11 B | 3.405081 | 1.806986 | 1.752628 | 3.295092 | 1.925283 |  | 6 | 7 | 8 | 9 | 10 | 6 B  | 0.000000 |  |  |  |  | 7 B | 1.807065 | 0.000000 |  |  |  | 8 B | 3.524157 | 2.978544 | 0.000000 |  |  | 9 B | 1.745595 | 2.755059 | 2.905105 | 0.000000 |  | 10 Ru | 3.466356 | 3.295082 | 2.354729 | 2.221879 | 0.000000 | 11 B | 2.957692 | 1.719116 | 2.755051 | 2.978626 | 2.269139 |
|                                                                                                                   | 1                                                                                                                                                                                                                                                                                                                                                                                                                                                                                                                                                                                                                                                                                                                                                                                                                                                                                                                                                                                                                                                                                                                                                                                                                                                                                                                                                                                                                                                                                                                                                                                                                                                                                                                                                                                                                                                                                                                                                        | 2        | 3        | 4        | 5        |   |   |     |          |  |  |  |  |     |          |          |  |  |  |      |          |          |          |  |  |      |          |          |          |          |  |      |          |          |          |          |          |      |          |          |          |          |          |     |          |          |          |          |          |     |          |          |          |          |          |     |          |          |          |          |          |       |          |          |          |          |          |      |          |          |          |          |          |  |   |   |   |   |    |      |          |  |  |  |  |     |          |          |  |  |  |     |          |          |          |  |  |     |          |          |          |          |  |       |          |          |          |          |          |      |          |          |          |          |          |
| 1 B                                                                                                               | 0.000000                                                                                                                                                                                                                                                                                                                                                                                                                                                                                                                                                                                                                                                                                                                                                                                                                                                                                                                                                                                                                                                                                                                                                                                                                                                                                                                                                                                                                                                                                                                                                                                                                                                                                                                                                                                                                                                                                                                                                 |          |          |          |          |   |   |     |          |  |  |  |  |     |          |          |  |  |  |      |          |          |          |  |  |      |          |          |          |          |  |      |          |          |          |          |          |      |          |          |          |          |          |     |          |          |          |          |          |     |          |          |          |          |          |     |          |          |          |          |          |       |          |          |          |          |          |      |          |          |          |          |          |  |   |   |   |   |    |      |          |  |  |  |  |     |          |          |  |  |  |     |          |          |          |  |  |     |          |          |          |          |  |       |          |          |          |          |          |      |          |          |          |          |          |
| 2 B                                                                                                               | 2.997481                                                                                                                                                                                                                                                                                                                                                                                                                                                                                                                                                                                                                                                                                                                                                                                                                                                                                                                                                                                                                                                                                                                                                                                                                                                                                                                                                                                                                                                                                                                                                                                                                                                                                                                                                                                                                                                                                                                                                 | 0.000000 |          |          |          |   |   |     |          |  |  |  |  |     |          |          |  |  |  |      |          |          |          |  |  |      |          |          |          |          |  |      |          |          |          |          |          |      |          |          |          |          |          |     |          |          |          |          |          |     |          |          |          |          |          |     |          |          |          |          |          |       |          |          |          |          |          |      |          |          |          |          |          |  |   |   |   |   |    |      |          |  |  |  |  |     |          |          |  |  |  |     |          |          |          |  |  |     |          |          |          |          |  |       |          |          |          |          |          |      |          |          |          |          |          |
| 3 B                                                                                                               | 3.044492                                                                                                                                                                                                                                                                                                                                                                                                                                                                                                                                                                                                                                                                                                                                                                                                                                                                                                                                                                                                                                                                                                                                                                                                                                                                                                                                                                                                                                                                                                                                                                                                                                                                                                                                                                                                                                                                                                                                                 | 3.103729 | 0.000000 |          |          |   |   |     |          |  |  |  |  |     |          |          |  |  |  |      |          |          |          |  |  |      |          |          |          |          |  |      |          |          |          |          |          |      |          |          |          |          |          |     |          |          |          |          |          |     |          |          |          |          |          |     |          |          |          |          |          |       |          |          |          |          |          |      |          |          |          |          |          |  |   |   |   |   |    |      |          |  |  |  |  |     |          |          |  |  |  |     |          |          |          |  |  |     |          |          |          |          |  |       |          |          |          |          |          |      |          |          |          |          |          |
| 4 Ru                                                                                                              | 2.146052                                                                                                                                                                                                                                                                                                                                                                                                                                                                                                                                                                                                                                                                                                                                                                                                                                                                                                                                                                                                                                                                                                                                                                                                                                                                                                                                                                                                                                                                                                                                                                                                                                                                                                                                                                                                                                                                                                                                                 | 3.466356 | 3.085585 | 0.000000 |          |   |   |     |          |  |  |  |  |     |          |          |  |  |  |      |          |          |          |  |  |      |          |          |          |          |  |      |          |          |          |          |          |      |          |          |          |          |          |     |          |          |          |          |          |     |          |          |          |          |          |     |          |          |          |          |          |       |          |          |          |          |          |      |          |          |          |          |          |  |   |   |   |   |    |      |          |  |  |  |  |     |          |          |  |  |  |     |          |          |          |  |  |     |          |          |          |          |  |       |          |          |          |          |          |      |          |          |          |          |          |
| 5 B                                                                                                               | 3.044492                                                                                                                                                                                                                                                                                                                                                                                                                                                                                                                                                                                                                                                                                                                                                                                                                                                                                                                                                                                                                                                                                                                                                                                                                                                                                                                                                                                                                                                                                                                                                                                                                                                                                                                                                                                                                                                                                                                                                 | 1.848432 | 2.991248 | 2.243617 | 0.000000 |   |   |     |          |  |  |  |  |     |          |          |  |  |  |      |          |          |          |  |  |      |          |          |          |          |  |      |          |          |          |          |          |      |          |          |          |          |          |     |          |          |          |          |          |     |          |          |          |          |          |     |          |          |          |          |          |       |          |          |          |          |          |      |          |          |          |          |          |  |   |   |   |   |    |      |          |  |  |  |  |     |          |          |  |  |  |     |          |          |          |  |  |     |          |          |          |          |  |       |          |          |          |          |          |      |          |          |          |          |          |
| 6 B                                                                                                               | 2.997481                                                                                                                                                                                                                                                                                                                                                                                                                                                                                                                                                                                                                                                                                                                                                                                                                                                                                                                                                                                                                                                                                                                                                                                                                                                                                                                                                                                                                                                                                                                                                                                                                                                                                                                                                                                                                                                                                                                                                 | 4.046807 | 1.848432 | 2.040024 | 3.103729 |   |   |     |          |  |  |  |  |     |          |          |  |  |  |      |          |          |          |  |  |      |          |          |          |          |  |      |          |          |          |          |          |      |          |          |          |          |          |     |          |          |          |          |          |     |          |          |          |          |          |     |          |          |          |          |          |       |          |          |          |          |          |      |          |          |          |          |          |  |   |   |   |   |    |      |          |  |  |  |  |     |          |          |  |  |  |     |          |          |          |  |  |     |          |          |          |          |  |       |          |          |          |          |          |      |          |          |          |          |          |
| 7 B                                                                                                               | 3.405072                                                                                                                                                                                                                                                                                                                                                                                                                                                                                                                                                                                                                                                                                                                                                                                                                                                                                                                                                                                                                                                                                                                                                                                                                                                                                                                                                                                                                                                                                                                                                                                                                                                                                                                                                                                                                                                                                                                                                 | 2.957624 | 1.925337 | 2.269128 | 1.752535 |   |   |     |          |  |  |  |  |     |          |          |  |  |  |      |          |          |          |  |  |      |          |          |          |          |  |      |          |          |          |          |          |      |          |          |          |          |          |     |          |          |          |          |          |     |          |          |          |          |          |     |          |          |          |          |          |       |          |          |          |          |          |      |          |          |          |          |          |  |   |   |   |   |    |      |          |  |  |  |  |     |          |          |  |  |  |     |          |          |          |  |  |     |          |          |          |          |  |       |          |          |          |          |          |      |          |          |          |          |          |
| 8 B                                                                                                               | 1.749330                                                                                                                                                                                                                                                                                                                                                                                                                                                                                                                                                                                                                                                                                                                                                                                                                                                                                                                                                                                                                                                                                                                                                                                                                                                                                                                                                                                                                                                                                                                                                                                                                                                                                                                                                                                                                                                                                                                                                 | 1.745664 | 3.344956 | 2.221806 | 1.769055 |   |   |     |          |  |  |  |  |     |          |          |  |  |  |      |          |          |          |  |  |      |          |          |          |          |  |      |          |          |          |          |          |      |          |          |          |          |          |     |          |          |          |          |          |     |          |          |          |          |          |     |          |          |          |          |          |       |          |          |          |          |          |      |          |          |          |          |          |  |   |   |   |   |    |      |          |  |  |  |  |     |          |          |  |  |  |     |          |          |          |  |  |     |          |          |          |          |  |       |          |          |          |          |          |      |          |          |          |          |          |
| 9 B                                                                                                               | 1.749323                                                                                                                                                                                                                                                                                                                                                                                                                                                                                                                                                                                                                                                                                                                                                                                                                                                                                                                                                                                                                                                                                                                                                                                                                                                                                                                                                                                                                                                                                                                                                                                                                                                                                                                                                                                                                                                                                                                                                 | 3.524184 | 1.769086 | 2.354650 | 3.344932 |   |   |     |          |  |  |  |  |     |          |          |  |  |  |      |          |          |          |  |  |      |          |          |          |          |  |      |          |          |          |          |          |      |          |          |          |          |          |     |          |          |          |          |          |     |          |          |          |          |          |     |          |          |          |          |          |       |          |          |          |          |          |      |          |          |          |          |          |  |   |   |   |   |    |      |          |  |  |  |  |     |          |          |  |  |  |     |          |          |          |  |  |     |          |          |          |          |  |       |          |          |          |          |          |      |          |          |          |          |          |
| 10 Ru                                                                                                             | 2.146052                                                                                                                                                                                                                                                                                                                                                                                                                                                                                                                                                                                                                                                                                                                                                                                                                                                                                                                                                                                                                                                                                                                                                                                                                                                                                                                                                                                                                                                                                                                                                                                                                                                                                                                                                                                                                                                                                                                                                 | 2.040024 | 2.243617 | 3.497571 | 3.085585 |   |   |     |          |  |  |  |  |     |          |          |  |  |  |      |          |          |          |  |  |      |          |          |          |          |  |      |          |          |          |          |          |      |          |          |          |          |          |     |          |          |          |          |          |     |          |          |          |          |          |     |          |          |          |          |          |       |          |          |          |          |          |      |          |          |          |          |          |  |   |   |   |   |    |      |          |  |  |  |  |     |          |          |  |  |  |     |          |          |          |  |  |     |          |          |          |          |  |       |          |          |          |          |          |      |          |          |          |          |          |
| 11 B                                                                                                              | 3.405081                                                                                                                                                                                                                                                                                                                                                                                                                                                                                                                                                                                                                                                                                                                                                                                                                                                                                                                                                                                                                                                                                                                                                                                                                                                                                                                                                                                                                                                                                                                                                                                                                                                                                                                                                                                                                                                                                                                                                 | 1.806986 | 1.752628 | 3.295092 | 1.925283 |   |   |     |          |  |  |  |  |     |          |          |  |  |  |      |          |          |          |  |  |      |          |          |          |          |  |      |          |          |          |          |          |      |          |          |          |          |          |     |          |          |          |          |          |     |          |          |          |          |          |     |          |          |          |          |          |       |          |          |          |          |          |      |          |          |          |          |          |  |   |   |   |   |    |      |          |  |  |  |  |     |          |          |  |  |  |     |          |          |          |  |  |     |          |          |          |          |  |       |          |          |          |          |          |      |          |          |          |          |          |
|                                                                                                                   | 6                                                                                                                                                                                                                                                                                                                                                                                                                                                                                                                                                                                                                                                                                                                                                                                                                                                                                                                                                                                                                                                                                                                                                                                                                                                                                                                                                                                                                                                                                                                                                                                                                                                                                                                                                                                                                                                                                                                                                        | 7        | 8        | 9        | 10       |   |   |     |          |  |  |  |  |     |          |          |  |  |  |      |          |          |          |  |  |      |          |          |          |          |  |      |          |          |          |          |          |      |          |          |          |          |          |     |          |          |          |          |          |     |          |          |          |          |          |     |          |          |          |          |          |       |          |          |          |          |          |      |          |          |          |          |          |  |   |   |   |   |    |      |          |  |  |  |  |     |          |          |  |  |  |     |          |          |          |  |  |     |          |          |          |          |  |       |          |          |          |          |          |      |          |          |          |          |          |
| 6 B                                                                                                               | 0.000000                                                                                                                                                                                                                                                                                                                                                                                                                                                                                                                                                                                                                                                                                                                                                                                                                                                                                                                                                                                                                                                                                                                                                                                                                                                                                                                                                                                                                                                                                                                                                                                                                                                                                                                                                                                                                                                                                                                                                 |          |          |          |          |   |   |     |          |  |  |  |  |     |          |          |  |  |  |      |          |          |          |  |  |      |          |          |          |          |  |      |          |          |          |          |          |      |          |          |          |          |          |     |          |          |          |          |          |     |          |          |          |          |          |     |          |          |          |          |          |       |          |          |          |          |          |      |          |          |          |          |          |  |   |   |   |   |    |      |          |  |  |  |  |     |          |          |  |  |  |     |          |          |          |  |  |     |          |          |          |          |  |       |          |          |          |          |          |      |          |          |          |          |          |
| 7 B                                                                                                               | 1.807065                                                                                                                                                                                                                                                                                                                                                                                                                                                                                                                                                                                                                                                                                                                                                                                                                                                                                                                                                                                                                                                                                                                                                                                                                                                                                                                                                                                                                                                                                                                                                                                                                                                                                                                                                                                                                                                                                                                                                 | 0.000000 |          |          |          |   |   |     |          |  |  |  |  |     |          |          |  |  |  |      |          |          |          |  |  |      |          |          |          |          |  |      |          |          |          |          |          |      |          |          |          |          |          |     |          |          |          |          |          |     |          |          |          |          |          |     |          |          |          |          |          |       |          |          |          |          |          |      |          |          |          |          |          |  |   |   |   |   |    |      |          |  |  |  |  |     |          |          |  |  |  |     |          |          |          |  |  |     |          |          |          |          |  |       |          |          |          |          |          |      |          |          |          |          |          |
| 8 B                                                                                                               | 3.524157                                                                                                                                                                                                                                                                                                                                                                                                                                                                                                                                                                                                                                                                                                                                                                                                                                                                                                                                                                                                                                                                                                                                                                                                                                                                                                                                                                                                                                                                                                                                                                                                                                                                                                                                                                                                                                                                                                                                                 | 2.978544 | 0.000000 |          |          |   |   |     |          |  |  |  |  |     |          |          |  |  |  |      |          |          |          |  |  |      |          |          |          |          |  |      |          |          |          |          |          |      |          |          |          |          |          |     |          |          |          |          |          |     |          |          |          |          |          |     |          |          |          |          |          |       |          |          |          |          |          |      |          |          |          |          |          |  |   |   |   |   |    |      |          |  |  |  |  |     |          |          |  |  |  |     |          |          |          |  |  |     |          |          |          |          |  |       |          |          |          |          |          |      |          |          |          |          |          |
| 9 B                                                                                                               | 1.745595                                                                                                                                                                                                                                                                                                                                                                                                                                                                                                                                                                                                                                                                                                                                                                                                                                                                                                                                                                                                                                                                                                                                                                                                                                                                                                                                                                                                                                                                                                                                                                                                                                                                                                                                                                                                                                                                                                                                                 | 2.755059 | 2.905105 | 0.000000 |          |   |   |     |          |  |  |  |  |     |          |          |  |  |  |      |          |          |          |  |  |      |          |          |          |          |  |      |          |          |          |          |          |      |          |          |          |          |          |     |          |          |          |          |          |     |          |          |          |          |          |     |          |          |          |          |          |       |          |          |          |          |          |      |          |          |          |          |          |  |   |   |   |   |    |      |          |  |  |  |  |     |          |          |  |  |  |     |          |          |          |  |  |     |          |          |          |          |  |       |          |          |          |          |          |      |          |          |          |          |          |
| 10 Ru                                                                                                             | 3.466356                                                                                                                                                                                                                                                                                                                                                                                                                                                                                                                                                                                                                                                                                                                                                                                                                                                                                                                                                                                                                                                                                                                                                                                                                                                                                                                                                                                                                                                                                                                                                                                                                                                                                                                                                                                                                                                                                                                                                 | 3.295082 | 2.354729 | 2.221879 | 0.000000 |   |   |     |          |  |  |  |  |     |          |          |  |  |  |      |          |          |          |  |  |      |          |          |          |          |  |      |          |          |          |          |          |      |          |          |          |          |          |     |          |          |          |          |          |     |          |          |          |          |          |     |          |          |          |          |          |       |          |          |          |          |          |      |          |          |          |          |          |  |   |   |   |   |    |      |          |  |  |  |  |     |          |          |  |  |  |     |          |          |          |  |  |     |          |          |          |          |  |       |          |          |          |          |          |      |          |          |          |          |          |
| 11 B                                                                                                              | 2.957692                                                                                                                                                                                                                                                                                                                                                                                                                                                                                                                                                                                                                                                                                                                                                                                                                                                                                                                                                                                                                                                                                                                                                                                                                                                                                                                                                                                                                                                                                                                                                                                                                                                                                                                                                                                                                                                                                                                                                 | 1.719116 | 2.755051 | 2.978626 | 2.269139 |   |   |     |          |  |  |  |  |     |          |          |  |  |  |      |          |          |          |  |  |      |          |          |          |          |  |      |          |          |          |          |          |      |          |          |          |          |          |     |          |          |          |          |          |     |          |          |          |          |          |     |          |          |          |          |          |       |          |          |          |          |          |      |          |          |          |          |          |  |   |   |   |   |    |      |          |  |  |  |  |     |          |          |  |  |  |     |          |          |          |  |  |     |          |          |          |          |  |       |          |          |          |          |          |      |          |          |          |          |          |

| 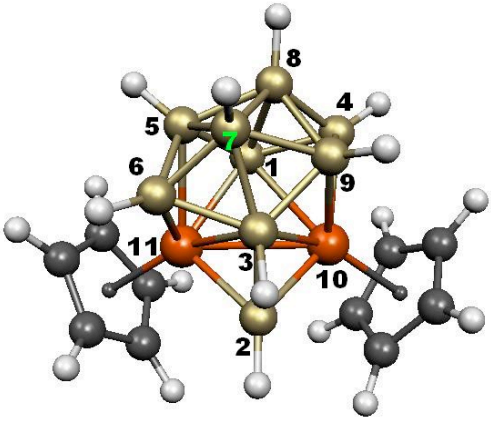 <p>7. -806.15614275 +18.6</p>   | <table border="1"> <thead> <tr> <th></th> <th>1</th> <th>2</th> <th>3</th> <th>4</th> <th>5</th> </tr> </thead> <tbody> <tr><td>1 B</td><td>0.000000</td><td></td><td></td><td></td><td></td></tr> <tr><td>2 B</td><td>3.391590</td><td>0.000000</td><td></td><td></td><td></td></tr> <tr><td>3 B</td><td>2.772761</td><td>1.650537</td><td>0.000000</td><td></td><td></td></tr> <tr><td>4 B</td><td>1.803334</td><td>3.797452</td><td>2.932946</td><td>0.000000</td><td></td></tr> <tr><td>5 B</td><td>1.812607</td><td>3.694025</td><td>2.568440</td><td>2.899651</td><td>0.000000</td></tr> <tr><td>6 B</td><td>3.018915</td><td>2.840733</td><td>1.832954</td><td>3.888957</td><td>1.782472</td></tr> <tr><td>7 B</td><td>2.897656</td><td>3.454384</td><td>1.839258</td><td>2.978006</td><td>1.808989</td></tr> <tr><td>8 B</td><td>2.016952</td><td>4.122062</td><td>2.741540</td><td>1.705271</td><td>1.798797</td></tr> <tr><td>9 B</td><td>2.696593</td><td>3.107288</td><td>1.786936</td><td>1.780016</td><td>2.835566</td></tr> <tr><td>10 Ru</td><td>2.297727</td><td>2.137640</td><td>2.232908</td><td>2.062805</td><td>3.482929</td></tr> <tr><td>11 Ru</td><td>2.172021</td><td>2.150296</td><td>2.237166</td><td>3.540991</td><td>2.269293</td></tr> <tr> <th></th> <th>6</th> <th>7</th> <th>8</th> <th>9</th> <th>10</th> </tr> <tr><td>6 B</td><td>0.000000</td><td></td><td></td><td></td><td></td></tr> <tr><td>7 B</td><td>1.721498</td><td>0.000000</td><td></td><td></td><td></td></tr> <tr><td>8 B</td><td>2.975583</td><td>1.753526</td><td>0.000000</td><td></td><td></td></tr> <tr><td>9 B</td><td>3.046032</td><td>1.849670</td><td>1.777053</td><td>0.000000</td><td></td></tr> <tr><td>10 Ru</td><td>3.668569</td><td>3.486928</td><td>3.169033</td><td>2.287906</td><td>0.000000</td></tr> <tr><td>11 Ru</td><td>2.047552</td><td>3.116365</td><td>3.450379</td><td>3.468164</td><td>2.698077</td></tr> </tbody> </table> |          | 1        | 2        | 3        | 4 | 5 | 1 B  | 0.000000 |  |  |  |  | 2 B | 3.391590 | 0.000000 |  |  |  | 3 B  | 2.772761 | 1.650537 | 0.000000 |  |  | 4 B | 1.803334 | 3.797452 | 2.932946 | 0.000000 |  | 5 B | 1.812607 | 3.694025 | 2.568440 | 2.899651 | 0.000000 | 6 B | 3.018915 | 2.840733 | 1.832954 | 3.888957 | 1.782472 | 7 B | 2.897656 | 3.454384 | 1.839258 | 2.978006 | 1.808989 | 8 B | 2.016952 | 4.122062 | 2.741540 | 1.705271 | 1.798797 | 9 B | 2.696593 | 3.107288 | 1.786936 | 1.780016 | 2.835566 | 10 Ru | 2.297727 | 2.137640 | 2.232908 | 2.062805 | 3.482929 | 11 Ru | 2.172021 | 2.150296 | 2.237166 | 3.540991 | 2.269293 |  | 6 | 7 | 8 | 9 | 10 | 6 B | 0.000000 |  |  |  |  | 7 B | 1.721498 | 0.000000 |  |  |  | 8 B | 2.975583 | 1.753526 | 0.000000 |  |  | 9 B | 3.046032 | 1.849670 | 1.777053 | 0.000000 |  | 10 Ru | 3.668569 | 3.486928 | 3.169033 | 2.287906 | 0.000000 | 11 Ru | 2.047552 | 3.116365 | 3.450379 | 3.468164 | 2.698077 |
|-------------------------------------------------------------------------------------------------------------------|-----------------------------------------------------------------------------------------------------------------------------------------------------------------------------------------------------------------------------------------------------------------------------------------------------------------------------------------------------------------------------------------------------------------------------------------------------------------------------------------------------------------------------------------------------------------------------------------------------------------------------------------------------------------------------------------------------------------------------------------------------------------------------------------------------------------------------------------------------------------------------------------------------------------------------------------------------------------------------------------------------------------------------------------------------------------------------------------------------------------------------------------------------------------------------------------------------------------------------------------------------------------------------------------------------------------------------------------------------------------------------------------------------------------------------------------------------------------------------------------------------------------------------------------------------------------------------------------------------------------------------------------------------------------------------------------------------------------------------------------------------------------------------------------------------------------------------------------------------------------------------------------------------------------------------------------------------------|----------|----------|----------|----------|---|---|------|----------|--|--|--|--|-----|----------|----------|--|--|--|------|----------|----------|----------|--|--|-----|----------|----------|----------|----------|--|-----|----------|----------|----------|----------|----------|-----|----------|----------|----------|----------|----------|-----|----------|----------|----------|----------|----------|-----|----------|----------|----------|----------|----------|-----|----------|----------|----------|----------|----------|-------|----------|----------|----------|----------|----------|-------|----------|----------|----------|----------|----------|--|---|---|---|---|----|-----|----------|--|--|--|--|-----|----------|----------|--|--|--|-----|----------|----------|----------|--|--|-----|----------|----------|----------|----------|--|-------|----------|----------|----------|----------|----------|-------|----------|----------|----------|----------|----------|
|                                                                                                                   | 1                                                                                                                                                                                                                                                                                                                                                                                                                                                                                                                                                                                                                                                                                                                                                                                                                                                                                                                                                                                                                                                                                                                                                                                                                                                                                                                                                                                                                                                                                                                                                                                                                                                                                                                                                                                                                                                                                                                                                         | 2        | 3        | 4        | 5        |   |   |      |          |  |  |  |  |     |          |          |  |  |  |      |          |          |          |  |  |     |          |          |          |          |  |     |          |          |          |          |          |     |          |          |          |          |          |     |          |          |          |          |          |     |          |          |          |          |          |     |          |          |          |          |          |       |          |          |          |          |          |       |          |          |          |          |          |  |   |   |   |   |    |     |          |  |  |  |  |     |          |          |  |  |  |     |          |          |          |  |  |     |          |          |          |          |  |       |          |          |          |          |          |       |          |          |          |          |          |
| 1 B                                                                                                               | 0.000000                                                                                                                                                                                                                                                                                                                                                                                                                                                                                                                                                                                                                                                                                                                                                                                                                                                                                                                                                                                                                                                                                                                                                                                                                                                                                                                                                                                                                                                                                                                                                                                                                                                                                                                                                                                                                                                                                                                                                  |          |          |          |          |   |   |      |          |  |  |  |  |     |          |          |  |  |  |      |          |          |          |  |  |     |          |          |          |          |  |     |          |          |          |          |          |     |          |          |          |          |          |     |          |          |          |          |          |     |          |          |          |          |          |     |          |          |          |          |          |       |          |          |          |          |          |       |          |          |          |          |          |  |   |   |   |   |    |     |          |  |  |  |  |     |          |          |  |  |  |     |          |          |          |  |  |     |          |          |          |          |  |       |          |          |          |          |          |       |          |          |          |          |          |
| 2 B                                                                                                               | 3.391590                                                                                                                                                                                                                                                                                                                                                                                                                                                                                                                                                                                                                                                                                                                                                                                                                                                                                                                                                                                                                                                                                                                                                                                                                                                                                                                                                                                                                                                                                                                                                                                                                                                                                                                                                                                                                                                                                                                                                  | 0.000000 |          |          |          |   |   |      |          |  |  |  |  |     |          |          |  |  |  |      |          |          |          |  |  |     |          |          |          |          |  |     |          |          |          |          |          |     |          |          |          |          |          |     |          |          |          |          |          |     |          |          |          |          |          |     |          |          |          |          |          |       |          |          |          |          |          |       |          |          |          |          |          |  |   |   |   |   |    |     |          |  |  |  |  |     |          |          |  |  |  |     |          |          |          |  |  |     |          |          |          |          |  |       |          |          |          |          |          |       |          |          |          |          |          |
| 3 B                                                                                                               | 2.772761                                                                                                                                                                                                                                                                                                                                                                                                                                                                                                                                                                                                                                                                                                                                                                                                                                                                                                                                                                                                                                                                                                                                                                                                                                                                                                                                                                                                                                                                                                                                                                                                                                                                                                                                                                                                                                                                                                                                                  | 1.650537 | 0.000000 |          |          |   |   |      |          |  |  |  |  |     |          |          |  |  |  |      |          |          |          |  |  |     |          |          |          |          |  |     |          |          |          |          |          |     |          |          |          |          |          |     |          |          |          |          |          |     |          |          |          |          |          |     |          |          |          |          |          |       |          |          |          |          |          |       |          |          |          |          |          |  |   |   |   |   |    |     |          |  |  |  |  |     |          |          |  |  |  |     |          |          |          |  |  |     |          |          |          |          |  |       |          |          |          |          |          |       |          |          |          |          |          |
| 4 B                                                                                                               | 1.803334                                                                                                                                                                                                                                                                                                                                                                                                                                                                                                                                                                                                                                                                                                                                                                                                                                                                                                                                                                                                                                                                                                                                                                                                                                                                                                                                                                                                                                                                                                                                                                                                                                                                                                                                                                                                                                                                                                                                                  | 3.797452 | 2.932946 | 0.000000 |          |   |   |      |          |  |  |  |  |     |          |          |  |  |  |      |          |          |          |  |  |     |          |          |          |          |  |     |          |          |          |          |          |     |          |          |          |          |          |     |          |          |          |          |          |     |          |          |          |          |          |     |          |          |          |          |          |       |          |          |          |          |          |       |          |          |          |          |          |  |   |   |   |   |    |     |          |  |  |  |  |     |          |          |  |  |  |     |          |          |          |  |  |     |          |          |          |          |  |       |          |          |          |          |          |       |          |          |          |          |          |
| 5 B                                                                                                               | 1.812607                                                                                                                                                                                                                                                                                                                                                                                                                                                                                                                                                                                                                                                                                                                                                                                                                                                                                                                                                                                                                                                                                                                                                                                                                                                                                                                                                                                                                                                                                                                                                                                                                                                                                                                                                                                                                                                                                                                                                  | 3.694025 | 2.568440 | 2.899651 | 0.000000 |   |   |      |          |  |  |  |  |     |          |          |  |  |  |      |          |          |          |  |  |     |          |          |          |          |  |     |          |          |          |          |          |     |          |          |          |          |          |     |          |          |          |          |          |     |          |          |          |          |          |     |          |          |          |          |          |       |          |          |          |          |          |       |          |          |          |          |          |  |   |   |   |   |    |     |          |  |  |  |  |     |          |          |  |  |  |     |          |          |          |  |  |     |          |          |          |          |  |       |          |          |          |          |          |       |          |          |          |          |          |
| 6 B                                                                                                               | 3.018915                                                                                                                                                                                                                                                                                                                                                                                                                                                                                                                                                                                                                                                                                                                                                                                                                                                                                                                                                                                                                                                                                                                                                                                                                                                                                                                                                                                                                                                                                                                                                                                                                                                                                                                                                                                                                                                                                                                                                  | 2.840733 | 1.832954 | 3.888957 | 1.782472 |   |   |      |          |  |  |  |  |     |          |          |  |  |  |      |          |          |          |  |  |     |          |          |          |          |  |     |          |          |          |          |          |     |          |          |          |          |          |     |          |          |          |          |          |     |          |          |          |          |          |     |          |          |          |          |          |       |          |          |          |          |          |       |          |          |          |          |          |  |   |   |   |   |    |     |          |  |  |  |  |     |          |          |  |  |  |     |          |          |          |  |  |     |          |          |          |          |  |       |          |          |          |          |          |       |          |          |          |          |          |
| 7 B                                                                                                               | 2.897656                                                                                                                                                                                                                                                                                                                                                                                                                                                                                                                                                                                                                                                                                                                                                                                                                                                                                                                                                                                                                                                                                                                                                                                                                                                                                                                                                                                                                                                                                                                                                                                                                                                                                                                                                                                                                                                                                                                                                  | 3.454384 | 1.839258 | 2.978006 | 1.808989 |   |   |      |          |  |  |  |  |     |          |          |  |  |  |      |          |          |          |  |  |     |          |          |          |          |  |     |          |          |          |          |          |     |          |          |          |          |          |     |          |          |          |          |          |     |          |          |          |          |          |     |          |          |          |          |          |       |          |          |          |          |          |       |          |          |          |          |          |  |   |   |   |   |    |     |          |  |  |  |  |     |          |          |  |  |  |     |          |          |          |  |  |     |          |          |          |          |  |       |          |          |          |          |          |       |          |          |          |          |          |
| 8 B                                                                                                               | 2.016952                                                                                                                                                                                                                                                                                                                                                                                                                                                                                                                                                                                                                                                                                                                                                                                                                                                                                                                                                                                                                                                                                                                                                                                                                                                                                                                                                                                                                                                                                                                                                                                                                                                                                                                                                                                                                                                                                                                                                  | 4.122062 | 2.741540 | 1.705271 | 1.798797 |   |   |      |          |  |  |  |  |     |          |          |  |  |  |      |          |          |          |  |  |     |          |          |          |          |  |     |          |          |          |          |          |     |          |          |          |          |          |     |          |          |          |          |          |     |          |          |          |          |          |     |          |          |          |          |          |       |          |          |          |          |          |       |          |          |          |          |          |  |   |   |   |   |    |     |          |  |  |  |  |     |          |          |  |  |  |     |          |          |          |  |  |     |          |          |          |          |  |       |          |          |          |          |          |       |          |          |          |          |          |
| 9 B                                                                                                               | 2.696593                                                                                                                                                                                                                                                                                                                                                                                                                                                                                                                                                                                                                                                                                                                                                                                                                                                                                                                                                                                                                                                                                                                                                                                                                                                                                                                                                                                                                                                                                                                                                                                                                                                                                                                                                                                                                                                                                                                                                  | 3.107288 | 1.786936 | 1.780016 | 2.835566 |   |   |      |          |  |  |  |  |     |          |          |  |  |  |      |          |          |          |  |  |     |          |          |          |          |  |     |          |          |          |          |          |     |          |          |          |          |          |     |          |          |          |          |          |     |          |          |          |          |          |     |          |          |          |          |          |       |          |          |          |          |          |       |          |          |          |          |          |  |   |   |   |   |    |     |          |  |  |  |  |     |          |          |  |  |  |     |          |          |          |  |  |     |          |          |          |          |  |       |          |          |          |          |          |       |          |          |          |          |          |
| 10 Ru                                                                                                             | 2.297727                                                                                                                                                                                                                                                                                                                                                                                                                                                                                                                                                                                                                                                                                                                                                                                                                                                                                                                                                                                                                                                                                                                                                                                                                                                                                                                                                                                                                                                                                                                                                                                                                                                                                                                                                                                                                                                                                                                                                  | 2.137640 | 2.232908 | 2.062805 | 3.482929 |   |   |      |          |  |  |  |  |     |          |          |  |  |  |      |          |          |          |  |  |     |          |          |          |          |  |     |          |          |          |          |          |     |          |          |          |          |          |     |          |          |          |          |          |     |          |          |          |          |          |     |          |          |          |          |          |       |          |          |          |          |          |       |          |          |          |          |          |  |   |   |   |   |    |     |          |  |  |  |  |     |          |          |  |  |  |     |          |          |          |  |  |     |          |          |          |          |  |       |          |          |          |          |          |       |          |          |          |          |          |
| 11 Ru                                                                                                             | 2.172021                                                                                                                                                                                                                                                                                                                                                                                                                                                                                                                                                                                                                                                                                                                                                                                                                                                                                                                                                                                                                                                                                                                                                                                                                                                                                                                                                                                                                                                                                                                                                                                                                                                                                                                                                                                                                                                                                                                                                  | 2.150296 | 2.237166 | 3.540991 | 2.269293 |   |   |      |          |  |  |  |  |     |          |          |  |  |  |      |          |          |          |  |  |     |          |          |          |          |  |     |          |          |          |          |          |     |          |          |          |          |          |     |          |          |          |          |          |     |          |          |          |          |          |     |          |          |          |          |          |       |          |          |          |          |          |       |          |          |          |          |          |  |   |   |   |   |    |     |          |  |  |  |  |     |          |          |  |  |  |     |          |          |          |  |  |     |          |          |          |          |  |       |          |          |          |          |          |       |          |          |          |          |          |
|                                                                                                                   | 6                                                                                                                                                                                                                                                                                                                                                                                                                                                                                                                                                                                                                                                                                                                                                                                                                                                                                                                                                                                                                                                                                                                                                                                                                                                                                                                                                                                                                                                                                                                                                                                                                                                                                                                                                                                                                                                                                                                                                         | 7        | 8        | 9        | 10       |   |   |      |          |  |  |  |  |     |          |          |  |  |  |      |          |          |          |  |  |     |          |          |          |          |  |     |          |          |          |          |          |     |          |          |          |          |          |     |          |          |          |          |          |     |          |          |          |          |          |     |          |          |          |          |          |       |          |          |          |          |          |       |          |          |          |          |          |  |   |   |   |   |    |     |          |  |  |  |  |     |          |          |  |  |  |     |          |          |          |  |  |     |          |          |          |          |  |       |          |          |          |          |          |       |          |          |          |          |          |
| 6 B                                                                                                               | 0.000000                                                                                                                                                                                                                                                                                                                                                                                                                                                                                                                                                                                                                                                                                                                                                                                                                                                                                                                                                                                                                                                                                                                                                                                                                                                                                                                                                                                                                                                                                                                                                                                                                                                                                                                                                                                                                                                                                                                                                  |          |          |          |          |   |   |      |          |  |  |  |  |     |          |          |  |  |  |      |          |          |          |  |  |     |          |          |          |          |  |     |          |          |          |          |          |     |          |          |          |          |          |     |          |          |          |          |          |     |          |          |          |          |          |     |          |          |          |          |          |       |          |          |          |          |          |       |          |          |          |          |          |  |   |   |   |   |    |     |          |  |  |  |  |     |          |          |  |  |  |     |          |          |          |  |  |     |          |          |          |          |  |       |          |          |          |          |          |       |          |          |          |          |          |
| 7 B                                                                                                               | 1.721498                                                                                                                                                                                                                                                                                                                                                                                                                                                                                                                                                                                                                                                                                                                                                                                                                                                                                                                                                                                                                                                                                                                                                                                                                                                                                                                                                                                                                                                                                                                                                                                                                                                                                                                                                                                                                                                                                                                                                  | 0.000000 |          |          |          |   |   |      |          |  |  |  |  |     |          |          |  |  |  |      |          |          |          |  |  |     |          |          |          |          |  |     |          |          |          |          |          |     |          |          |          |          |          |     |          |          |          |          |          |     |          |          |          |          |          |     |          |          |          |          |          |       |          |          |          |          |          |       |          |          |          |          |          |  |   |   |   |   |    |     |          |  |  |  |  |     |          |          |  |  |  |     |          |          |          |  |  |     |          |          |          |          |  |       |          |          |          |          |          |       |          |          |          |          |          |
| 8 B                                                                                                               | 2.975583                                                                                                                                                                                                                                                                                                                                                                                                                                                                                                                                                                                                                                                                                                                                                                                                                                                                                                                                                                                                                                                                                                                                                                                                                                                                                                                                                                                                                                                                                                                                                                                                                                                                                                                                                                                                                                                                                                                                                  | 1.753526 | 0.000000 |          |          |   |   |      |          |  |  |  |  |     |          |          |  |  |  |      |          |          |          |  |  |     |          |          |          |          |  |     |          |          |          |          |          |     |          |          |          |          |          |     |          |          |          |          |          |     |          |          |          |          |          |     |          |          |          |          |          |       |          |          |          |          |          |       |          |          |          |          |          |  |   |   |   |   |    |     |          |  |  |  |  |     |          |          |  |  |  |     |          |          |          |  |  |     |          |          |          |          |  |       |          |          |          |          |          |       |          |          |          |          |          |
| 9 B                                                                                                               | 3.046032                                                                                                                                                                                                                                                                                                                                                                                                                                                                                                                                                                                                                                                                                                                                                                                                                                                                                                                                                                                                                                                                                                                                                                                                                                                                                                                                                                                                                                                                                                                                                                                                                                                                                                                                                                                                                                                                                                                                                  | 1.849670 | 1.777053 | 0.000000 |          |   |   |      |          |  |  |  |  |     |          |          |  |  |  |      |          |          |          |  |  |     |          |          |          |          |  |     |          |          |          |          |          |     |          |          |          |          |          |     |          |          |          |          |          |     |          |          |          |          |          |     |          |          |          |          |          |       |          |          |          |          |          |       |          |          |          |          |          |  |   |   |   |   |    |     |          |  |  |  |  |     |          |          |  |  |  |     |          |          |          |  |  |     |          |          |          |          |  |       |          |          |          |          |          |       |          |          |          |          |          |
| 10 Ru                                                                                                             | 3.668569                                                                                                                                                                                                                                                                                                                                                                                                                                                                                                                                                                                                                                                                                                                                                                                                                                                                                                                                                                                                                                                                                                                                                                                                                                                                                                                                                                                                                                                                                                                                                                                                                                                                                                                                                                                                                                                                                                                                                  | 3.486928 | 3.169033 | 2.287906 | 0.000000 |   |   |      |          |  |  |  |  |     |          |          |  |  |  |      |          |          |          |  |  |     |          |          |          |          |  |     |          |          |          |          |          |     |          |          |          |          |          |     |          |          |          |          |          |     |          |          |          |          |          |     |          |          |          |          |          |       |          |          |          |          |          |       |          |          |          |          |          |  |   |   |   |   |    |     |          |  |  |  |  |     |          |          |  |  |  |     |          |          |          |  |  |     |          |          |          |          |  |       |          |          |          |          |          |       |          |          |          |          |          |
| 11 Ru                                                                                                             | 2.047552                                                                                                                                                                                                                                                                                                                                                                                                                                                                                                                                                                                                                                                                                                                                                                                                                                                                                                                                                                                                                                                                                                                                                                                                                                                                                                                                                                                                                                                                                                                                                                                                                                                                                                                                                                                                                                                                                                                                                  | 3.116365 | 3.450379 | 3.468164 | 2.698077 |   |   |      |          |  |  |  |  |     |          |          |  |  |  |      |          |          |          |  |  |     |          |          |          |          |  |     |          |          |          |          |          |     |          |          |          |          |          |     |          |          |          |          |          |     |          |          |          |          |          |     |          |          |          |          |          |       |          |          |          |          |          |       |          |          |          |          |          |  |   |   |   |   |    |     |          |  |  |  |  |     |          |          |  |  |  |     |          |          |          |  |  |     |          |          |          |          |  |       |          |          |          |          |          |       |          |          |          |          |          |
|  <p>8. -806.15588141 +18.8</p>  | <table border="1"> <thead> <tr> <th></th> <th>1</th> <th>2</th> <th>3</th> <th>4</th> <th>5</th> </tr> </thead> <tbody> <tr><td>1 B</td><td>0.000000</td><td></td><td></td><td></td><td></td></tr> <tr><td>2 B</td><td>3.075183</td><td>0.000000</td><td></td><td></td><td></td></tr> <tr><td>3 B</td><td>2.927400</td><td>3.075183</td><td>0.000000</td><td></td><td></td></tr> <tr><td>4 B</td><td>3.603561</td><td>1.826179</td><td>3.603561</td><td>0.000000</td><td></td></tr> <tr><td>5 B</td><td>2.925434</td><td>3.504426</td><td>1.769066</td><td>3.119365</td><td>0.000000</td></tr> <tr><td>6 B</td><td>1.769066</td><td>3.504426</td><td>2.925434</td><td>3.119365</td><td>1.854400</td></tr> <tr><td>7 B</td><td>1.845113</td><td>1.825506</td><td>1.845113</td><td>2.977321</td><td>2.704091</td></tr> <tr><td>8 B</td><td>2.979264</td><td>2.864241</td><td>2.979264</td><td>1.743549</td><td>1.750163</td></tr> <tr><td>9 B</td><td>1.722242</td><td>3.581416</td><td>1.722242</td><td>3.928777</td><td>1.794848</td></tr> <tr><td>10 Ru</td><td>2.042974</td><td>2.127671</td><td>3.739447</td><td>2.113732</td><td>3.379770</td></tr> <tr><td>11 Ru</td><td>3.739447</td><td>2.127671</td><td>2.042974</td><td>2.113732</td><td>2.282269</td></tr> <tr> <th></th> <th>6</th> <th>7</th> <th>8</th> <th>9</th> <th>10</th> </tr> <tr><td>6 B</td><td>0.000000</td><td></td><td></td><td></td><td></td></tr> <tr><td>7 B</td><td>2.704091</td><td>0.000000</td><td></td><td></td><td></td></tr> <tr><td>8 B</td><td>1.750163</td><td>2.928975</td><td>0.000000</td><td></td><td></td></tr> <tr><td>9 B</td><td>1.794848</td><td>2.017861</td><td>2.856745</td><td>0.000000</td><td></td></tr> <tr><td>10 Ru</td><td>2.282269</td><td>2.405815</td><td>2.305544</td><td>3.219728</td><td>0.000000</td></tr> <tr><td>11 Ru</td><td>3.379770</td><td>2.405815</td><td>2.305544</td><td>3.219728</td><td>3.351000</td></tr> </tbody> </table> |          | 1        | 2        | 3        | 4 | 5 | 1 B  | 0.000000 |  |  |  |  | 2 B | 3.075183 | 0.000000 |  |  |  | 3 B  | 2.927400 | 3.075183 | 0.000000 |  |  | 4 B | 3.603561 | 1.826179 | 3.603561 | 0.000000 |  | 5 B | 2.925434 | 3.504426 | 1.769066 | 3.119365 | 0.000000 | 6 B | 1.769066 | 3.504426 | 2.925434 | 3.119365 | 1.854400 | 7 B | 1.845113 | 1.825506 | 1.845113 | 2.977321 | 2.704091 | 8 B | 2.979264 | 2.864241 | 2.979264 | 1.743549 | 1.750163 | 9 B | 1.722242 | 3.581416 | 1.722242 | 3.928777 | 1.794848 | 10 Ru | 2.042974 | 2.127671 | 3.739447 | 2.113732 | 3.379770 | 11 Ru | 3.739447 | 2.127671 | 2.042974 | 2.113732 | 2.282269 |  | 6 | 7 | 8 | 9 | 10 | 6 B | 0.000000 |  |  |  |  | 7 B | 2.704091 | 0.000000 |  |  |  | 8 B | 1.750163 | 2.928975 | 0.000000 |  |  | 9 B | 1.794848 | 2.017861 | 2.856745 | 0.000000 |  | 10 Ru | 2.282269 | 2.405815 | 2.305544 | 3.219728 | 0.000000 | 11 Ru | 3.379770 | 2.405815 | 2.305544 | 3.219728 | 3.351000 |
|                                                                                                                   | 1                                                                                                                                                                                                                                                                                                                                                                                                                                                                                                                                                                                                                                                                                                                                                                                                                                                                                                                                                                                                                                                                                                                                                                                                                                                                                                                                                                                                                                                                                                                                                                                                                                                                                                                                                                                                                                                                                                                                                         | 2        | 3        | 4        | 5        |   |   |      |          |  |  |  |  |     |          |          |  |  |  |      |          |          |          |  |  |     |          |          |          |          |  |     |          |          |          |          |          |     |          |          |          |          |          |     |          |          |          |          |          |     |          |          |          |          |          |     |          |          |          |          |          |       |          |          |          |          |          |       |          |          |          |          |          |  |   |   |   |   |    |     |          |  |  |  |  |     |          |          |  |  |  |     |          |          |          |  |  |     |          |          |          |          |  |       |          |          |          |          |          |       |          |          |          |          |          |
| 1 B                                                                                                               | 0.000000                                                                                                                                                                                                                                                                                                                                                                                                                                                                                                                                                                                                                                                                                                                                                                                                                                                                                                                                                                                                                                                                                                                                                                                                                                                                                                                                                                                                                                                                                                                                                                                                                                                                                                                                                                                                                                                                                                                                                  |          |          |          |          |   |   |      |          |  |  |  |  |     |          |          |  |  |  |      |          |          |          |  |  |     |          |          |          |          |  |     |          |          |          |          |          |     |          |          |          |          |          |     |          |          |          |          |          |     |          |          |          |          |          |     |          |          |          |          |          |       |          |          |          |          |          |       |          |          |          |          |          |  |   |   |   |   |    |     |          |  |  |  |  |     |          |          |  |  |  |     |          |          |          |  |  |     |          |          |          |          |  |       |          |          |          |          |          |       |          |          |          |          |          |
| 2 B                                                                                                               | 3.075183                                                                                                                                                                                                                                                                                                                                                                                                                                                                                                                                                                                                                                                                                                                                                                                                                                                                                                                                                                                                                                                                                                                                                                                                                                                                                                                                                                                                                                                                                                                                                                                                                                                                                                                                                                                                                                                                                                                                                  | 0.000000 |          |          |          |   |   |      |          |  |  |  |  |     |          |          |  |  |  |      |          |          |          |  |  |     |          |          |          |          |  |     |          |          |          |          |          |     |          |          |          |          |          |     |          |          |          |          |          |     |          |          |          |          |          |     |          |          |          |          |          |       |          |          |          |          |          |       |          |          |          |          |          |  |   |   |   |   |    |     |          |  |  |  |  |     |          |          |  |  |  |     |          |          |          |  |  |     |          |          |          |          |  |       |          |          |          |          |          |       |          |          |          |          |          |
| 3 B                                                                                                               | 2.927400                                                                                                                                                                                                                                                                                                                                                                                                                                                                                                                                                                                                                                                                                                                                                                                                                                                                                                                                                                                                                                                                                                                                                                                                                                                                                                                                                                                                                                                                                                                                                                                                                                                                                                                                                                                                                                                                                                                                                  | 3.075183 | 0.000000 |          |          |   |   |      |          |  |  |  |  |     |          |          |  |  |  |      |          |          |          |  |  |     |          |          |          |          |  |     |          |          |          |          |          |     |          |          |          |          |          |     |          |          |          |          |          |     |          |          |          |          |          |     |          |          |          |          |          |       |          |          |          |          |          |       |          |          |          |          |          |  |   |   |   |   |    |     |          |  |  |  |  |     |          |          |  |  |  |     |          |          |          |  |  |     |          |          |          |          |  |       |          |          |          |          |          |       |          |          |          |          |          |
| 4 B                                                                                                               | 3.603561                                                                                                                                                                                                                                                                                                                                                                                                                                                                                                                                                                                                                                                                                                                                                                                                                                                                                                                                                                                                                                                                                                                                                                                                                                                                                                                                                                                                                                                                                                                                                                                                                                                                                                                                                                                                                                                                                                                                                  | 1.826179 | 3.603561 | 0.000000 |          |   |   |      |          |  |  |  |  |     |          |          |  |  |  |      |          |          |          |  |  |     |          |          |          |          |  |     |          |          |          |          |          |     |          |          |          |          |          |     |          |          |          |          |          |     |          |          |          |          |          |     |          |          |          |          |          |       |          |          |          |          |          |       |          |          |          |          |          |  |   |   |   |   |    |     |          |  |  |  |  |     |          |          |  |  |  |     |          |          |          |  |  |     |          |          |          |          |  |       |          |          |          |          |          |       |          |          |          |          |          |
| 5 B                                                                                                               | 2.925434                                                                                                                                                                                                                                                                                                                                                                                                                                                                                                                                                                                                                                                                                                                                                                                                                                                                                                                                                                                                                                                                                                                                                                                                                                                                                                                                                                                                                                                                                                                                                                                                                                                                                                                                                                                                                                                                                                                                                  | 3.504426 | 1.769066 | 3.119365 | 0.000000 |   |   |      |          |  |  |  |  |     |          |          |  |  |  |      |          |          |          |  |  |     |          |          |          |          |  |     |          |          |          |          |          |     |          |          |          |          |          |     |          |          |          |          |          |     |          |          |          |          |          |     |          |          |          |          |          |       |          |          |          |          |          |       |          |          |          |          |          |  |   |   |   |   |    |     |          |  |  |  |  |     |          |          |  |  |  |     |          |          |          |  |  |     |          |          |          |          |  |       |          |          |          |          |          |       |          |          |          |          |          |
| 6 B                                                                                                               | 1.769066                                                                                                                                                                                                                                                                                                                                                                                                                                                                                                                                                                                                                                                                                                                                                                                                                                                                                                                                                                                                                                                                                                                                                                                                                                                                                                                                                                                                                                                                                                                                                                                                                                                                                                                                                                                                                                                                                                                                                  | 3.504426 | 2.925434 | 3.119365 | 1.854400 |   |   |      |          |  |  |  |  |     |          |          |  |  |  |      |          |          |          |  |  |     |          |          |          |          |  |     |          |          |          |          |          |     |          |          |          |          |          |     |          |          |          |          |          |     |          |          |          |          |          |     |          |          |          |          |          |       |          |          |          |          |          |       |          |          |          |          |          |  |   |   |   |   |    |     |          |  |  |  |  |     |          |          |  |  |  |     |          |          |          |  |  |     |          |          |          |          |  |       |          |          |          |          |          |       |          |          |          |          |          |
| 7 B                                                                                                               | 1.845113                                                                                                                                                                                                                                                                                                                                                                                                                                                                                                                                                                                                                                                                                                                                                                                                                                                                                                                                                                                                                                                                                                                                                                                                                                                                                                                                                                                                                                                                                                                                                                                                                                                                                                                                                                                                                                                                                                                                                  | 1.825506 | 1.845113 | 2.977321 | 2.704091 |   |   |      |          |  |  |  |  |     |          |          |  |  |  |      |          |          |          |  |  |     |          |          |          |          |  |     |          |          |          |          |          |     |          |          |          |          |          |     |          |          |          |          |          |     |          |          |          |          |          |     |          |          |          |          |          |       |          |          |          |          |          |       |          |          |          |          |          |  |   |   |   |   |    |     |          |  |  |  |  |     |          |          |  |  |  |     |          |          |          |  |  |     |          |          |          |          |  |       |          |          |          |          |          |       |          |          |          |          |          |
| 8 B                                                                                                               | 2.979264                                                                                                                                                                                                                                                                                                                                                                                                                                                                                                                                                                                                                                                                                                                                                                                                                                                                                                                                                                                                                                                                                                                                                                                                                                                                                                                                                                                                                                                                                                                                                                                                                                                                                                                                                                                                                                                                                                                                                  | 2.864241 | 2.979264 | 1.743549 | 1.750163 |   |   |      |          |  |  |  |  |     |          |          |  |  |  |      |          |          |          |  |  |     |          |          |          |          |  |     |          |          |          |          |          |     |          |          |          |          |          |     |          |          |          |          |          |     |          |          |          |          |          |     |          |          |          |          |          |       |          |          |          |          |          |       |          |          |          |          |          |  |   |   |   |   |    |     |          |  |  |  |  |     |          |          |  |  |  |     |          |          |          |  |  |     |          |          |          |          |  |       |          |          |          |          |          |       |          |          |          |          |          |
| 9 B                                                                                                               | 1.722242                                                                                                                                                                                                                                                                                                                                                                                                                                                                                                                                                                                                                                                                                                                                                                                                                                                                                                                                                                                                                                                                                                                                                                                                                                                                                                                                                                                                                                                                                                                                                                                                                                                                                                                                                                                                                                                                                                                                                  | 3.581416 | 1.722242 | 3.928777 | 1.794848 |   |   |      |          |  |  |  |  |     |          |          |  |  |  |      |          |          |          |  |  |     |          |          |          |          |  |     |          |          |          |          |          |     |          |          |          |          |          |     |          |          |          |          |          |     |          |          |          |          |          |     |          |          |          |          |          |       |          |          |          |          |          |       |          |          |          |          |          |  |   |   |   |   |    |     |          |  |  |  |  |     |          |          |  |  |  |     |          |          |          |  |  |     |          |          |          |          |  |       |          |          |          |          |          |       |          |          |          |          |          |
| 10 Ru                                                                                                             | 2.042974                                                                                                                                                                                                                                                                                                                                                                                                                                                                                                                                                                                                                                                                                                                                                                                                                                                                                                                                                                                                                                                                                                                                                                                                                                                                                                                                                                                                                                                                                                                                                                                                                                                                                                                                                                                                                                                                                                                                                  | 2.127671 | 3.739447 | 2.113732 | 3.379770 |   |   |      |          |  |  |  |  |     |          |          |  |  |  |      |          |          |          |  |  |     |          |          |          |          |  |     |          |          |          |          |          |     |          |          |          |          |          |     |          |          |          |          |          |     |          |          |          |          |          |     |          |          |          |          |          |       |          |          |          |          |          |       |          |          |          |          |          |  |   |   |   |   |    |     |          |  |  |  |  |     |          |          |  |  |  |     |          |          |          |  |  |     |          |          |          |          |  |       |          |          |          |          |          |       |          |          |          |          |          |
| 11 Ru                                                                                                             | 3.739447                                                                                                                                                                                                                                                                                                                                                                                                                                                                                                                                                                                                                                                                                                                                                                                                                                                                                                                                                                                                                                                                                                                                                                                                                                                                                                                                                                                                                                                                                                                                                                                                                                                                                                                                                                                                                                                                                                                                                  | 2.127671 | 2.042974 | 2.113732 | 2.282269 |   |   |      |          |  |  |  |  |     |          |          |  |  |  |      |          |          |          |  |  |     |          |          |          |          |  |     |          |          |          |          |          |     |          |          |          |          |          |     |          |          |          |          |          |     |          |          |          |          |          |     |          |          |          |          |          |       |          |          |          |          |          |       |          |          |          |          |          |  |   |   |   |   |    |     |          |  |  |  |  |     |          |          |  |  |  |     |          |          |          |  |  |     |          |          |          |          |  |       |          |          |          |          |          |       |          |          |          |          |          |
|                                                                                                                   | 6                                                                                                                                                                                                                                                                                                                                                                                                                                                                                                                                                                                                                                                                                                                                                                                                                                                                                                                                                                                                                                                                                                                                                                                                                                                                                                                                                                                                                                                                                                                                                                                                                                                                                                                                                                                                                                                                                                                                                         | 7        | 8        | 9        | 10       |   |   |      |          |  |  |  |  |     |          |          |  |  |  |      |          |          |          |  |  |     |          |          |          |          |  |     |          |          |          |          |          |     |          |          |          |          |          |     |          |          |          |          |          |     |          |          |          |          |          |     |          |          |          |          |          |       |          |          |          |          |          |       |          |          |          |          |          |  |   |   |   |   |    |     |          |  |  |  |  |     |          |          |  |  |  |     |          |          |          |  |  |     |          |          |          |          |  |       |          |          |          |          |          |       |          |          |          |          |          |
| 6 B                                                                                                               | 0.000000                                                                                                                                                                                                                                                                                                                                                                                                                                                                                                                                                                                                                                                                                                                                                                                                                                                                                                                                                                                                                                                                                                                                                                                                                                                                                                                                                                                                                                                                                                                                                                                                                                                                                                                                                                                                                                                                                                                                                  |          |          |          |          |   |   |      |          |  |  |  |  |     |          |          |  |  |  |      |          |          |          |  |  |     |          |          |          |          |  |     |          |          |          |          |          |     |          |          |          |          |          |     |          |          |          |          |          |     |          |          |          |          |          |     |          |          |          |          |          |       |          |          |          |          |          |       |          |          |          |          |          |  |   |   |   |   |    |     |          |  |  |  |  |     |          |          |  |  |  |     |          |          |          |  |  |     |          |          |          |          |  |       |          |          |          |          |          |       |          |          |          |          |          |
| 7 B                                                                                                               | 2.704091                                                                                                                                                                                                                                                                                                                                                                                                                                                                                                                                                                                                                                                                                                                                                                                                                                                                                                                                                                                                                                                                                                                                                                                                                                                                                                                                                                                                                                                                                                                                                                                                                                                                                                                                                                                                                                                                                                                                                  | 0.000000 |          |          |          |   |   |      |          |  |  |  |  |     |          |          |  |  |  |      |          |          |          |  |  |     |          |          |          |          |  |     |          |          |          |          |          |     |          |          |          |          |          |     |          |          |          |          |          |     |          |          |          |          |          |     |          |          |          |          |          |       |          |          |          |          |          |       |          |          |          |          |          |  |   |   |   |   |    |     |          |  |  |  |  |     |          |          |  |  |  |     |          |          |          |  |  |     |          |          |          |          |  |       |          |          |          |          |          |       |          |          |          |          |          |
| 8 B                                                                                                               | 1.750163                                                                                                                                                                                                                                                                                                                                                                                                                                                                                                                                                                                                                                                                                                                                                                                                                                                                                                                                                                                                                                                                                                                                                                                                                                                                                                                                                                                                                                                                                                                                                                                                                                                                                                                                                                                                                                                                                                                                                  | 2.928975 | 0.000000 |          |          |   |   |      |          |  |  |  |  |     |          |          |  |  |  |      |          |          |          |  |  |     |          |          |          |          |  |     |          |          |          |          |          |     |          |          |          |          |          |     |          |          |          |          |          |     |          |          |          |          |          |     |          |          |          |          |          |       |          |          |          |          |          |       |          |          |          |          |          |  |   |   |   |   |    |     |          |  |  |  |  |     |          |          |  |  |  |     |          |          |          |  |  |     |          |          |          |          |  |       |          |          |          |          |          |       |          |          |          |          |          |
| 9 B                                                                                                               | 1.794848                                                                                                                                                                                                                                                                                                                                                                                                                                                                                                                                                                                                                                                                                                                                                                                                                                                                                                                                                                                                                                                                                                                                                                                                                                                                                                                                                                                                                                                                                                                                                                                                                                                                                                                                                                                                                                                                                                                                                  | 2.017861 | 2.856745 | 0.000000 |          |   |   |      |          |  |  |  |  |     |          |          |  |  |  |      |          |          |          |  |  |     |          |          |          |          |  |     |          |          |          |          |          |     |          |          |          |          |          |     |          |          |          |          |          |     |          |          |          |          |          |     |          |          |          |          |          |       |          |          |          |          |          |       |          |          |          |          |          |  |   |   |   |   |    |     |          |  |  |  |  |     |          |          |  |  |  |     |          |          |          |  |  |     |          |          |          |          |  |       |          |          |          |          |          |       |          |          |          |          |          |
| 10 Ru                                                                                                             | 2.282269                                                                                                                                                                                                                                                                                                                                                                                                                                                                                                                                                                                                                                                                                                                                                                                                                                                                                                                                                                                                                                                                                                                                                                                                                                                                                                                                                                                                                                                                                                                                                                                                                                                                                                                                                                                                                                                                                                                                                  | 2.405815 | 2.305544 | 3.219728 | 0.000000 |   |   |      |          |  |  |  |  |     |          |          |  |  |  |      |          |          |          |  |  |     |          |          |          |          |  |     |          |          |          |          |          |     |          |          |          |          |          |     |          |          |          |          |          |     |          |          |          |          |          |     |          |          |          |          |          |       |          |          |          |          |          |       |          |          |          |          |          |  |   |   |   |   |    |     |          |  |  |  |  |     |          |          |  |  |  |     |          |          |          |  |  |     |          |          |          |          |  |       |          |          |          |          |          |       |          |          |          |          |          |
| 11 Ru                                                                                                             | 3.379770                                                                                                                                                                                                                                                                                                                                                                                                                                                                                                                                                                                                                                                                                                                                                                                                                                                                                                                                                                                                                                                                                                                                                                                                                                                                                                                                                                                                                                                                                                                                                                                                                                                                                                                                                                                                                                                                                                                                                  | 2.405815 | 2.305544 | 3.219728 | 3.351000 |   |   |      |          |  |  |  |  |     |          |          |  |  |  |      |          |          |          |  |  |     |          |          |          |          |  |     |          |          |          |          |          |     |          |          |          |          |          |     |          |          |          |          |          |     |          |          |          |          |          |     |          |          |          |          |          |       |          |          |          |          |          |       |          |          |          |          |          |  |   |   |   |   |    |     |          |  |  |  |  |     |          |          |  |  |  |     |          |          |          |  |  |     |          |          |          |          |  |       |          |          |          |          |          |       |          |          |          |          |          |
|  <p>9. -806.15193641 +21.2</p> | <table border="1"> <thead> <tr> <th></th> <th>1</th> <th>2</th> <th>3</th> <th>4</th> <th>5</th> </tr> </thead> <tbody> <tr><td>1 Ru</td><td>0.000000</td><td></td><td></td><td></td><td></td></tr> <tr><td>2 B</td><td>2.266561</td><td>0.000000</td><td></td><td></td><td></td></tr> <tr><td>3 Ru</td><td>2.811148</td><td>2.149496</td><td>0.000000</td><td></td><td></td></tr> <tr><td>4 B</td><td>2.211619</td><td>3.433116</td><td>2.250909</td><td>0.000000</td><td></td></tr> <tr><td>5 B</td><td>2.395896</td><td>2.756598</td><td>3.224032</td><td>3.151630</td><td>0.000000</td></tr> <tr><td>6 B</td><td>2.995532</td><td>1.813419</td><td>2.377128</td><td>3.574245</td><td>1.806269</td></tr> <tr><td>7 B</td><td>3.207640</td><td>3.142532</td><td>2.441802</td><td>2.742973</td><td>1.760704</td></tr> <tr><td>8 B</td><td>2.330223</td><td>3.551103</td><td>2.991941</td><td>1.790706</td><td>1.822832</td></tr> <tr><td>9 B</td><td>3.297518</td><td>3.781396</td><td>2.226786</td><td>1.687354</td><td>2.951417</td></tr> <tr><td>10 B</td><td>2.078715</td><td>2.802819</td><td>2.066335</td><td>1.744298</td><td>3.887487</td></tr> <tr><td>11 B</td><td>2.260144</td><td>1.696685</td><td>3.272922</td><td>3.836654</td><td>1.678528</td></tr> <tr> <th></th> <th>6</th> <th>7</th> <th>8</th> <th>9</th> <th>10</th> </tr> <tr><td>6 B</td><td>0.000000</td><td></td><td></td><td></td><td></td></tr> <tr><td>7 B</td><td>1.824003</td><td>0.000000</td><td></td><td></td><td></td></tr> <tr><td>8 B</td><td>2.970803</td><td>1.807953</td><td>0.000000</td><td></td><td></td></tr> <tr><td>9 B</td><td>3.129916</td><td>1.668402</td><td>1.752594</td><td>0.000000</td><td></td></tr> <tr><td>10 B</td><td>3.789915</td><td>3.762511</td><td>3.197488</td><td>3.074362</td><td>0.000000</td></tr> <tr><td>11 B</td><td>1.687063</td><td>2.927265</td><td>3.150607</td><td>4.028064</td><td>3.803995</td></tr> </tbody> </table>   |          | 1        | 2        | 3        | 4 | 5 | 1 Ru | 0.000000 |  |  |  |  | 2 B | 2.266561 | 0.000000 |  |  |  | 3 Ru | 2.811148 | 2.149496 | 0.000000 |  |  | 4 B | 2.211619 | 3.433116 | 2.250909 | 0.000000 |  | 5 B | 2.395896 | 2.756598 | 3.224032 | 3.151630 | 0.000000 | 6 B | 2.995532 | 1.813419 | 2.377128 | 3.574245 | 1.806269 | 7 B | 3.207640 | 3.142532 | 2.441802 | 2.742973 | 1.760704 | 8 B | 2.330223 | 3.551103 | 2.991941 | 1.790706 | 1.822832 | 9 B | 3.297518 | 3.781396 | 2.226786 | 1.687354 | 2.951417 | 10 B  | 2.078715 | 2.802819 | 2.066335 | 1.744298 | 3.887487 | 11 B  | 2.260144 | 1.696685 | 3.272922 | 3.836654 | 1.678528 |  | 6 | 7 | 8 | 9 | 10 | 6 B | 0.000000 |  |  |  |  | 7 B | 1.824003 | 0.000000 |  |  |  | 8 B | 2.970803 | 1.807953 | 0.000000 |  |  | 9 B | 3.129916 | 1.668402 | 1.752594 | 0.000000 |  | 10 B  | 3.789915 | 3.762511 | 3.197488 | 3.074362 | 0.000000 | 11 B  | 1.687063 | 2.927265 | 3.150607 | 4.028064 | 3.803995 |
|                                                                                                                   | 1                                                                                                                                                                                                                                                                                                                                                                                                                                                                                                                                                                                                                                                                                                                                                                                                                                                                                                                                                                                                                                                                                                                                                                                                                                                                                                                                                                                                                                                                                                                                                                                                                                                                                                                                                                                                                                                                                                                                                         | 2        | 3        | 4        | 5        |   |   |      |          |  |  |  |  |     |          |          |  |  |  |      |          |          |          |  |  |     |          |          |          |          |  |     |          |          |          |          |          |     |          |          |          |          |          |     |          |          |          |          |          |     |          |          |          |          |          |     |          |          |          |          |          |       |          |          |          |          |          |       |          |          |          |          |          |  |   |   |   |   |    |     |          |  |  |  |  |     |          |          |  |  |  |     |          |          |          |  |  |     |          |          |          |          |  |       |          |          |          |          |          |       |          |          |          |          |          |
| 1 Ru                                                                                                              | 0.000000                                                                                                                                                                                                                                                                                                                                                                                                                                                                                                                                                                                                                                                                                                                                                                                                                                                                                                                                                                                                                                                                                                                                                                                                                                                                                                                                                                                                                                                                                                                                                                                                                                                                                                                                                                                                                                                                                                                                                  |          |          |          |          |   |   |      |          |  |  |  |  |     |          |          |  |  |  |      |          |          |          |  |  |     |          |          |          |          |  |     |          |          |          |          |          |     |          |          |          |          |          |     |          |          |          |          |          |     |          |          |          |          |          |     |          |          |          |          |          |       |          |          |          |          |          |       |          |          |          |          |          |  |   |   |   |   |    |     |          |  |  |  |  |     |          |          |  |  |  |     |          |          |          |  |  |     |          |          |          |          |  |       |          |          |          |          |          |       |          |          |          |          |          |
| 2 B                                                                                                               | 2.266561                                                                                                                                                                                                                                                                                                                                                                                                                                                                                                                                                                                                                                                                                                                                                                                                                                                                                                                                                                                                                                                                                                                                                                                                                                                                                                                                                                                                                                                                                                                                                                                                                                                                                                                                                                                                                                                                                                                                                  | 0.000000 |          |          |          |   |   |      |          |  |  |  |  |     |          |          |  |  |  |      |          |          |          |  |  |     |          |          |          |          |  |     |          |          |          |          |          |     |          |          |          |          |          |     |          |          |          |          |          |     |          |          |          |          |          |     |          |          |          |          |          |       |          |          |          |          |          |       |          |          |          |          |          |  |   |   |   |   |    |     |          |  |  |  |  |     |          |          |  |  |  |     |          |          |          |  |  |     |          |          |          |          |  |       |          |          |          |          |          |       |          |          |          |          |          |
| 3 Ru                                                                                                              | 2.811148                                                                                                                                                                                                                                                                                                                                                                                                                                                                                                                                                                                                                                                                                                                                                                                                                                                                                                                                                                                                                                                                                                                                                                                                                                                                                                                                                                                                                                                                                                                                                                                                                                                                                                                                                                                                                                                                                                                                                  | 2.149496 | 0.000000 |          |          |   |   |      |          |  |  |  |  |     |          |          |  |  |  |      |          |          |          |  |  |     |          |          |          |          |  |     |          |          |          |          |          |     |          |          |          |          |          |     |          |          |          |          |          |     |          |          |          |          |          |     |          |          |          |          |          |       |          |          |          |          |          |       |          |          |          |          |          |  |   |   |   |   |    |     |          |  |  |  |  |     |          |          |  |  |  |     |          |          |          |  |  |     |          |          |          |          |  |       |          |          |          |          |          |       |          |          |          |          |          |
| 4 B                                                                                                               | 2.211619                                                                                                                                                                                                                                                                                                                                                                                                                                                                                                                                                                                                                                                                                                                                                                                                                                                                                                                                                                                                                                                                                                                                                                                                                                                                                                                                                                                                                                                                                                                                                                                                                                                                                                                                                                                                                                                                                                                                                  | 3.433116 | 2.250909 | 0.000000 |          |   |   |      |          |  |  |  |  |     |          |          |  |  |  |      |          |          |          |  |  |     |          |          |          |          |  |     |          |          |          |          |          |     |          |          |          |          |          |     |          |          |          |          |          |     |          |          |          |          |          |     |          |          |          |          |          |       |          |          |          |          |          |       |          |          |          |          |          |  |   |   |   |   |    |     |          |  |  |  |  |     |          |          |  |  |  |     |          |          |          |  |  |     |          |          |          |          |  |       |          |          |          |          |          |       |          |          |          |          |          |
| 5 B                                                                                                               | 2.395896                                                                                                                                                                                                                                                                                                                                                                                                                                                                                                                                                                                                                                                                                                                                                                                                                                                                                                                                                                                                                                                                                                                                                                                                                                                                                                                                                                                                                                                                                                                                                                                                                                                                                                                                                                                                                                                                                                                                                  | 2.756598 | 3.224032 | 3.151630 | 0.000000 |   |   |      |          |  |  |  |  |     |          |          |  |  |  |      |          |          |          |  |  |     |          |          |          |          |  |     |          |          |          |          |          |     |          |          |          |          |          |     |          |          |          |          |          |     |          |          |          |          |          |     |          |          |          |          |          |       |          |          |          |          |          |       |          |          |          |          |          |  |   |   |   |   |    |     |          |  |  |  |  |     |          |          |  |  |  |     |          |          |          |  |  |     |          |          |          |          |  |       |          |          |          |          |          |       |          |          |          |          |          |
| 6 B                                                                                                               | 2.995532                                                                                                                                                                                                                                                                                                                                                                                                                                                                                                                                                                                                                                                                                                                                                                                                                                                                                                                                                                                                                                                                                                                                                                                                                                                                                                                                                                                                                                                                                                                                                                                                                                                                                                                                                                                                                                                                                                                                                  | 1.813419 | 2.377128 | 3.574245 | 1.806269 |   |   |      |          |  |  |  |  |     |          |          |  |  |  |      |          |          |          |  |  |     |          |          |          |          |  |     |          |          |          |          |          |     |          |          |          |          |          |     |          |          |          |          |          |     |          |          |          |          |          |     |          |          |          |          |          |       |          |          |          |          |          |       |          |          |          |          |          |  |   |   |   |   |    |     |          |  |  |  |  |     |          |          |  |  |  |     |          |          |          |  |  |     |          |          |          |          |  |       |          |          |          |          |          |       |          |          |          |          |          |
| 7 B                                                                                                               | 3.207640                                                                                                                                                                                                                                                                                                                                                                                                                                                                                                                                                                                                                                                                                                                                                                                                                                                                                                                                                                                                                                                                                                                                                                                                                                                                                                                                                                                                                                                                                                                                                                                                                                                                                                                                                                                                                                                                                                                                                  | 3.142532 | 2.441802 | 2.742973 | 1.760704 |   |   |      |          |  |  |  |  |     |          |          |  |  |  |      |          |          |          |  |  |     |          |          |          |          |  |     |          |          |          |          |          |     |          |          |          |          |          |     |          |          |          |          |          |     |          |          |          |          |          |     |          |          |          |          |          |       |          |          |          |          |          |       |          |          |          |          |          |  |   |   |   |   |    |     |          |  |  |  |  |     |          |          |  |  |  |     |          |          |          |  |  |     |          |          |          |          |  |       |          |          |          |          |          |       |          |          |          |          |          |
| 8 B                                                                                                               | 2.330223                                                                                                                                                                                                                                                                                                                                                                                                                                                                                                                                                                                                                                                                                                                                                                                                                                                                                                                                                                                                                                                                                                                                                                                                                                                                                                                                                                                                                                                                                                                                                                                                                                                                                                                                                                                                                                                                                                                                                  | 3.551103 | 2.991941 | 1.790706 | 1.822832 |   |   |      |          |  |  |  |  |     |          |          |  |  |  |      |          |          |          |  |  |     |          |          |          |          |  |     |          |          |          |          |          |     |          |          |          |          |          |     |          |          |          |          |          |     |          |          |          |          |          |     |          |          |          |          |          |       |          |          |          |          |          |       |          |          |          |          |          |  |   |   |   |   |    |     |          |  |  |  |  |     |          |          |  |  |  |     |          |          |          |  |  |     |          |          |          |          |  |       |          |          |          |          |          |       |          |          |          |          |          |
| 9 B                                                                                                               | 3.297518                                                                                                                                                                                                                                                                                                                                                                                                                                                                                                                                                                                                                                                                                                                                                                                                                                                                                                                                                                                                                                                                                                                                                                                                                                                                                                                                                                                                                                                                                                                                                                                                                                                                                                                                                                                                                                                                                                                                                  | 3.781396 | 2.226786 | 1.687354 | 2.951417 |   |   |      |          |  |  |  |  |     |          |          |  |  |  |      |          |          |          |  |  |     |          |          |          |          |  |     |          |          |          |          |          |     |          |          |          |          |          |     |          |          |          |          |          |     |          |          |          |          |          |     |          |          |          |          |          |       |          |          |          |          |          |       |          |          |          |          |          |  |   |   |   |   |    |     |          |  |  |  |  |     |          |          |  |  |  |     |          |          |          |  |  |     |          |          |          |          |  |       |          |          |          |          |          |       |          |          |          |          |          |
| 10 B                                                                                                              | 2.078715                                                                                                                                                                                                                                                                                                                                                                                                                                                                                                                                                                                                                                                                                                                                                                                                                                                                                                                                                                                                                                                                                                                                                                                                                                                                                                                                                                                                                                                                                                                                                                                                                                                                                                                                                                                                                                                                                                                                                  | 2.802819 | 2.066335 | 1.744298 | 3.887487 |   |   |      |          |  |  |  |  |     |          |          |  |  |  |      |          |          |          |  |  |     |          |          |          |          |  |     |          |          |          |          |          |     |          |          |          |          |          |     |          |          |          |          |          |     |          |          |          |          |          |     |          |          |          |          |          |       |          |          |          |          |          |       |          |          |          |          |          |  |   |   |   |   |    |     |          |  |  |  |  |     |          |          |  |  |  |     |          |          |          |  |  |     |          |          |          |          |  |       |          |          |          |          |          |       |          |          |          |          |          |
| 11 B                                                                                                              | 2.260144                                                                                                                                                                                                                                                                                                                                                                                                                                                                                                                                                                                                                                                                                                                                                                                                                                                                                                                                                                                                                                                                                                                                                                                                                                                                                                                                                                                                                                                                                                                                                                                                                                                                                                                                                                                                                                                                                                                                                  | 1.696685 | 3.272922 | 3.836654 | 1.678528 |   |   |      |          |  |  |  |  |     |          |          |  |  |  |      |          |          |          |  |  |     |          |          |          |          |  |     |          |          |          |          |          |     |          |          |          |          |          |     |          |          |          |          |          |     |          |          |          |          |          |     |          |          |          |          |          |       |          |          |          |          |          |       |          |          |          |          |          |  |   |   |   |   |    |     |          |  |  |  |  |     |          |          |  |  |  |     |          |          |          |  |  |     |          |          |          |          |  |       |          |          |          |          |          |       |          |          |          |          |          |
|                                                                                                                   | 6                                                                                                                                                                                                                                                                                                                                                                                                                                                                                                                                                                                                                                                                                                                                                                                                                                                                                                                                                                                                                                                                                                                                                                                                                                                                                                                                                                                                                                                                                                                                                                                                                                                                                                                                                                                                                                                                                                                                                         | 7        | 8        | 9        | 10       |   |   |      |          |  |  |  |  |     |          |          |  |  |  |      |          |          |          |  |  |     |          |          |          |          |  |     |          |          |          |          |          |     |          |          |          |          |          |     |          |          |          |          |          |     |          |          |          |          |          |     |          |          |          |          |          |       |          |          |          |          |          |       |          |          |          |          |          |  |   |   |   |   |    |     |          |  |  |  |  |     |          |          |  |  |  |     |          |          |          |  |  |     |          |          |          |          |  |       |          |          |          |          |          |       |          |          |          |          |          |
| 6 B                                                                                                               | 0.000000                                                                                                                                                                                                                                                                                                                                                                                                                                                                                                                                                                                                                                                                                                                                                                                                                                                                                                                                                                                                                                                                                                                                                                                                                                                                                                                                                                                                                                                                                                                                                                                                                                                                                                                                                                                                                                                                                                                                                  |          |          |          |          |   |   |      |          |  |  |  |  |     |          |          |  |  |  |      |          |          |          |  |  |     |          |          |          |          |  |     |          |          |          |          |          |     |          |          |          |          |          |     |          |          |          |          |          |     |          |          |          |          |          |     |          |          |          |          |          |       |          |          |          |          |          |       |          |          |          |          |          |  |   |   |   |   |    |     |          |  |  |  |  |     |          |          |  |  |  |     |          |          |          |  |  |     |          |          |          |          |  |       |          |          |          |          |          |       |          |          |          |          |          |
| 7 B                                                                                                               | 1.824003                                                                                                                                                                                                                                                                                                                                                                                                                                                                                                                                                                                                                                                                                                                                                                                                                                                                                                                                                                                                                                                                                                                                                                                                                                                                                                                                                                                                                                                                                                                                                                                                                                                                                                                                                                                                                                                                                                                                                  | 0.000000 |          |          |          |   |   |      |          |  |  |  |  |     |          |          |  |  |  |      |          |          |          |  |  |     |          |          |          |          |  |     |          |          |          |          |          |     |          |          |          |          |          |     |          |          |          |          |          |     |          |          |          |          |          |     |          |          |          |          |          |       |          |          |          |          |          |       |          |          |          |          |          |  |   |   |   |   |    |     |          |  |  |  |  |     |          |          |  |  |  |     |          |          |          |  |  |     |          |          |          |          |  |       |          |          |          |          |          |       |          |          |          |          |          |
| 8 B                                                                                                               | 2.970803                                                                                                                                                                                                                                                                                                                                                                                                                                                                                                                                                                                                                                                                                                                                                                                                                                                                                                                                                                                                                                                                                                                                                                                                                                                                                                                                                                                                                                                                                                                                                                                                                                                                                                                                                                                                                                                                                                                                                  | 1.807953 | 0.000000 |          |          |   |   |      |          |  |  |  |  |     |          |          |  |  |  |      |          |          |          |  |  |     |          |          |          |          |  |     |          |          |          |          |          |     |          |          |          |          |          |     |          |          |          |          |          |     |          |          |          |          |          |     |          |          |          |          |          |       |          |          |          |          |          |       |          |          |          |          |          |  |   |   |   |   |    |     |          |  |  |  |  |     |          |          |  |  |  |     |          |          |          |  |  |     |          |          |          |          |  |       |          |          |          |          |          |       |          |          |          |          |          |
| 9 B                                                                                                               | 3.129916                                                                                                                                                                                                                                                                                                                                                                                                                                                                                                                                                                                                                                                                                                                                                                                                                                                                                                                                                                                                                                                                                                                                                                                                                                                                                                                                                                                                                                                                                                                                                                                                                                                                                                                                                                                                                                                                                                                                                  | 1.668402 | 1.752594 | 0.000000 |          |   |   |      |          |  |  |  |  |     |          |          |  |  |  |      |          |          |          |  |  |     |          |          |          |          |  |     |          |          |          |          |          |     |          |          |          |          |          |     |          |          |          |          |          |     |          |          |          |          |          |     |          |          |          |          |          |       |          |          |          |          |          |       |          |          |          |          |          |  |   |   |   |   |    |     |          |  |  |  |  |     |          |          |  |  |  |     |          |          |          |  |  |     |          |          |          |          |  |       |          |          |          |          |          |       |          |          |          |          |          |
| 10 B                                                                                                              | 3.789915                                                                                                                                                                                                                                                                                                                                                                                                                                                                                                                                                                                                                                                                                                                                                                                                                                                                                                                                                                                                                                                                                                                                                                                                                                                                                                                                                                                                                                                                                                                                                                                                                                                                                                                                                                                                                                                                                                                                                  | 3.762511 | 3.197488 | 3.074362 | 0.000000 |   |   |      |          |  |  |  |  |     |          |          |  |  |  |      |          |          |          |  |  |     |          |          |          |          |  |     |          |          |          |          |          |     |          |          |          |          |          |     |          |          |          |          |          |     |          |          |          |          |          |     |          |          |          |          |          |       |          |          |          |          |          |       |          |          |          |          |          |  |   |   |   |   |    |     |          |  |  |  |  |     |          |          |  |  |  |     |          |          |          |  |  |     |          |          |          |          |  |       |          |          |          |          |          |       |          |          |          |          |          |
| 11 B                                                                                                              | 1.687063                                                                                                                                                                                                                                                                                                                                                                                                                                                                                                                                                                                                                                                                                                                                                                                                                                                                                                                                                                                                                                                                                                                                                                                                                                                                                                                                                                                                                                                                                                                                                                                                                                                                                                                                                                                                                                                                                                                                                  | 2.927265 | 3.150607 | 4.028064 | 3.803995 |   |   |      |          |  |  |  |  |     |          |          |  |  |  |      |          |          |          |  |  |     |          |          |          |          |  |     |          |          |          |          |          |     |          |          |          |          |          |     |          |          |          |          |          |     |          |          |          |          |          |     |          |          |          |          |          |       |          |          |          |          |          |       |          |          |          |          |          |  |   |   |   |   |    |     |          |  |  |  |  |     |          |          |  |  |  |     |          |          |          |  |  |     |          |          |          |          |  |       |          |          |          |          |          |       |          |          |          |          |          |

| 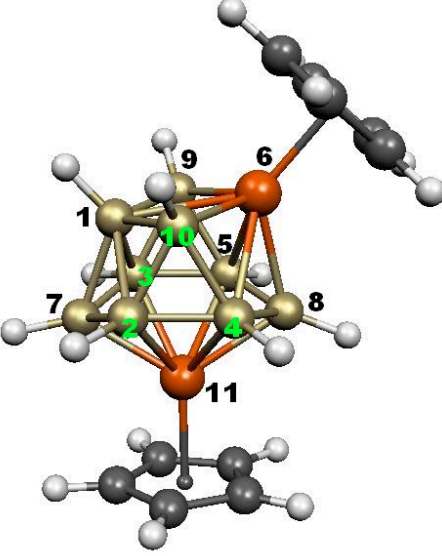 <p>10. -806.15074442 +22.0</p>   | <table border="1"> <thead> <tr> <th></th> <th>1</th> <th>2</th> <th>3</th> <th>4</th> <th>5</th> </tr> </thead> <tbody> <tr><td>1 B</td><td>0.000000</td><td></td><td></td><td></td><td></td></tr> <tr><td>2 B</td><td>1.989342</td><td>0.000000</td><td></td><td></td><td></td></tr> <tr><td>3 B</td><td>1.989027</td><td>2.905906</td><td>0.000000</td><td></td><td></td></tr> <tr><td>4 B</td><td>2.808399</td><td>1.714608</td><td>3.395855</td><td>0.000000</td><td></td></tr> <tr><td>5 B</td><td>2.808735</td><td>3.396093</td><td>1.714427</td><td>2.957105</td><td>0.000000</td></tr> <tr><td>6 Ru</td><td>2.461481</td><td>3.142712</td><td>3.142801</td><td>2.344847</td><td>2.346027</td></tr> <tr><td>7 B</td><td>1.858951</td><td>1.747177</td><td>1.746823</td><td>3.009102</td><td>3.008774</td></tr> <tr><td>8 B</td><td>3.335364</td><td>3.029565</td><td>3.029146</td><td>1.770920</td><td>1.770435</td></tr> <tr><td>9 B</td><td>1.861215</td><td>3.430447</td><td>1.723965</td><td>3.481265</td><td>1.781091</td></tr> <tr><td>10 B</td><td>1.861273</td><td>1.723513</td><td>3.430218</td><td>1.780308</td><td>3.482001</td></tr> <tr><td>11 Ru</td><td>3.065508</td><td>2.271873</td><td>2.274022</td><td>2.273057</td><td>2.274735</td></tr> <tr> <td></td> <td>6</td> <td>7</td> <td>8</td> <td>9</td> <td>10</td> </tr> <tr><td>6 Ru</td><td>0.000000</td><td></td><td></td><td></td><td></td></tr> <tr><td>7 B</td><td>3.737459</td><td>0.000000</td><td></td><td></td><td></td></tr> <tr><td>8 B</td><td>2.123065</td><td>3.514831</td><td>0.000000</td><td></td><td></td></tr> <tr><td>9 B</td><td>2.046794</td><td>2.981939</td><td>3.003754</td><td>0.000000</td><td></td></tr> <tr><td>10 B</td><td>2.046985</td><td>2.981721</td><td>3.004308</td><td>3.026906</td><td>0.000000</td></tr> <tr><td>11 Ru</td><td>3.518155</td><td>2.058582</td><td>2.139329</td><td>3.395998</td><td>3.394266</td></tr> </tbody> </table> |          | 1        | 2        | 3        | 4 | 5 | 1 B | 0.000000 |  |  |  |  | 2 B | 1.989342 | 0.000000 |  |  |  | 3 B | 1.989027 | 2.905906 | 0.000000 |  |  | 4 B  | 2.808399 | 1.714608 | 3.395855 | 0.000000 |  | 5 B | 2.808735 | 3.396093 | 1.714427 | 2.957105 | 0.000000 | 6 Ru | 2.461481 | 3.142712 | 3.142801 | 2.344847 | 2.346027 | 7 B | 1.858951 | 1.747177 | 1.746823 | 3.009102 | 3.008774 | 8 B | 3.335364 | 3.029565 | 3.029146 | 1.770920 | 1.770435 | 9 B | 1.861215 | 3.430447 | 1.723965 | 3.481265 | 1.781091 | 10 B | 1.861273 | 1.723513 | 3.430218 | 1.780308 | 3.482001 | 11 Ru | 3.065508 | 2.271873 | 2.274022 | 2.273057 | 2.274735 |  | 6 | 7 | 8 | 9 | 10 | 6 Ru | 0.000000 |  |  |  |  | 7 B | 3.737459 | 0.000000 |  |  |  | 8 B | 2.123065 | 3.514831 | 0.000000 |  |  | 9 B | 2.046794 | 2.981939 | 3.003754 | 0.000000 |  | 10 B | 2.046985 | 2.981721 | 3.004308 | 3.026906 | 0.000000 | 11 Ru | 3.518155 | 2.058582 | 2.139329 | 3.395998 | 3.394266 |
|--------------------------------------------------------------------------------------------------------------------|-----------------------------------------------------------------------------------------------------------------------------------------------------------------------------------------------------------------------------------------------------------------------------------------------------------------------------------------------------------------------------------------------------------------------------------------------------------------------------------------------------------------------------------------------------------------------------------------------------------------------------------------------------------------------------------------------------------------------------------------------------------------------------------------------------------------------------------------------------------------------------------------------------------------------------------------------------------------------------------------------------------------------------------------------------------------------------------------------------------------------------------------------------------------------------------------------------------------------------------------------------------------------------------------------------------------------------------------------------------------------------------------------------------------------------------------------------------------------------------------------------------------------------------------------------------------------------------------------------------------------------------------------------------------------------------------------------------------------------------------------------------------------------------------------------------------------------------------------------------------------------------------------------------------------------------------------------------|----------|----------|----------|----------|---|---|-----|----------|--|--|--|--|-----|----------|----------|--|--|--|-----|----------|----------|----------|--|--|------|----------|----------|----------|----------|--|-----|----------|----------|----------|----------|----------|------|----------|----------|----------|----------|----------|-----|----------|----------|----------|----------|----------|-----|----------|----------|----------|----------|----------|-----|----------|----------|----------|----------|----------|------|----------|----------|----------|----------|----------|-------|----------|----------|----------|----------|----------|--|---|---|---|---|----|------|----------|--|--|--|--|-----|----------|----------|--|--|--|-----|----------|----------|----------|--|--|-----|----------|----------|----------|----------|--|------|----------|----------|----------|----------|----------|-------|----------|----------|----------|----------|----------|
|                                                                                                                    | 1                                                                                                                                                                                                                                                                                                                                                                                                                                                                                                                                                                                                                                                                                                                                                                                                                                                                                                                                                                                                                                                                                                                                                                                                                                                                                                                                                                                                                                                                                                                                                                                                                                                                                                                                                                                                                                                                                                                                                         | 2        | 3        | 4        | 5        |   |   |     |          |  |  |  |  |     |          |          |  |  |  |     |          |          |          |  |  |      |          |          |          |          |  |     |          |          |          |          |          |      |          |          |          |          |          |     |          |          |          |          |          |     |          |          |          |          |          |     |          |          |          |          |          |      |          |          |          |          |          |       |          |          |          |          |          |  |   |   |   |   |    |      |          |  |  |  |  |     |          |          |  |  |  |     |          |          |          |  |  |     |          |          |          |          |  |      |          |          |          |          |          |       |          |          |          |          |          |
| 1 B                                                                                                                | 0.000000                                                                                                                                                                                                                                                                                                                                                                                                                                                                                                                                                                                                                                                                                                                                                                                                                                                                                                                                                                                                                                                                                                                                                                                                                                                                                                                                                                                                                                                                                                                                                                                                                                                                                                                                                                                                                                                                                                                                                  |          |          |          |          |   |   |     |          |  |  |  |  |     |          |          |  |  |  |     |          |          |          |  |  |      |          |          |          |          |  |     |          |          |          |          |          |      |          |          |          |          |          |     |          |          |          |          |          |     |          |          |          |          |          |     |          |          |          |          |          |      |          |          |          |          |          |       |          |          |          |          |          |  |   |   |   |   |    |      |          |  |  |  |  |     |          |          |  |  |  |     |          |          |          |  |  |     |          |          |          |          |  |      |          |          |          |          |          |       |          |          |          |          |          |
| 2 B                                                                                                                | 1.989342                                                                                                                                                                                                                                                                                                                                                                                                                                                                                                                                                                                                                                                                                                                                                                                                                                                                                                                                                                                                                                                                                                                                                                                                                                                                                                                                                                                                                                                                                                                                                                                                                                                                                                                                                                                                                                                                                                                                                  | 0.000000 |          |          |          |   |   |     |          |  |  |  |  |     |          |          |  |  |  |     |          |          |          |  |  |      |          |          |          |          |  |     |          |          |          |          |          |      |          |          |          |          |          |     |          |          |          |          |          |     |          |          |          |          |          |     |          |          |          |          |          |      |          |          |          |          |          |       |          |          |          |          |          |  |   |   |   |   |    |      |          |  |  |  |  |     |          |          |  |  |  |     |          |          |          |  |  |     |          |          |          |          |  |      |          |          |          |          |          |       |          |          |          |          |          |
| 3 B                                                                                                                | 1.989027                                                                                                                                                                                                                                                                                                                                                                                                                                                                                                                                                                                                                                                                                                                                                                                                                                                                                                                                                                                                                                                                                                                                                                                                                                                                                                                                                                                                                                                                                                                                                                                                                                                                                                                                                                                                                                                                                                                                                  | 2.905906 | 0.000000 |          |          |   |   |     |          |  |  |  |  |     |          |          |  |  |  |     |          |          |          |  |  |      |          |          |          |          |  |     |          |          |          |          |          |      |          |          |          |          |          |     |          |          |          |          |          |     |          |          |          |          |          |     |          |          |          |          |          |      |          |          |          |          |          |       |          |          |          |          |          |  |   |   |   |   |    |      |          |  |  |  |  |     |          |          |  |  |  |     |          |          |          |  |  |     |          |          |          |          |  |      |          |          |          |          |          |       |          |          |          |          |          |
| 4 B                                                                                                                | 2.808399                                                                                                                                                                                                                                                                                                                                                                                                                                                                                                                                                                                                                                                                                                                                                                                                                                                                                                                                                                                                                                                                                                                                                                                                                                                                                                                                                                                                                                                                                                                                                                                                                                                                                                                                                                                                                                                                                                                                                  | 1.714608 | 3.395855 | 0.000000 |          |   |   |     |          |  |  |  |  |     |          |          |  |  |  |     |          |          |          |  |  |      |          |          |          |          |  |     |          |          |          |          |          |      |          |          |          |          |          |     |          |          |          |          |          |     |          |          |          |          |          |     |          |          |          |          |          |      |          |          |          |          |          |       |          |          |          |          |          |  |   |   |   |   |    |      |          |  |  |  |  |     |          |          |  |  |  |     |          |          |          |  |  |     |          |          |          |          |  |      |          |          |          |          |          |       |          |          |          |          |          |
| 5 B                                                                                                                | 2.808735                                                                                                                                                                                                                                                                                                                                                                                                                                                                                                                                                                                                                                                                                                                                                                                                                                                                                                                                                                                                                                                                                                                                                                                                                                                                                                                                                                                                                                                                                                                                                                                                                                                                                                                                                                                                                                                                                                                                                  | 3.396093 | 1.714427 | 2.957105 | 0.000000 |   |   |     |          |  |  |  |  |     |          |          |  |  |  |     |          |          |          |  |  |      |          |          |          |          |  |     |          |          |          |          |          |      |          |          |          |          |          |     |          |          |          |          |          |     |          |          |          |          |          |     |          |          |          |          |          |      |          |          |          |          |          |       |          |          |          |          |          |  |   |   |   |   |    |      |          |  |  |  |  |     |          |          |  |  |  |     |          |          |          |  |  |     |          |          |          |          |  |      |          |          |          |          |          |       |          |          |          |          |          |
| 6 Ru                                                                                                               | 2.461481                                                                                                                                                                                                                                                                                                                                                                                                                                                                                                                                                                                                                                                                                                                                                                                                                                                                                                                                                                                                                                                                                                                                                                                                                                                                                                                                                                                                                                                                                                                                                                                                                                                                                                                                                                                                                                                                                                                                                  | 3.142712 | 3.142801 | 2.344847 | 2.346027 |   |   |     |          |  |  |  |  |     |          |          |  |  |  |     |          |          |          |  |  |      |          |          |          |          |  |     |          |          |          |          |          |      |          |          |          |          |          |     |          |          |          |          |          |     |          |          |          |          |          |     |          |          |          |          |          |      |          |          |          |          |          |       |          |          |          |          |          |  |   |   |   |   |    |      |          |  |  |  |  |     |          |          |  |  |  |     |          |          |          |  |  |     |          |          |          |          |  |      |          |          |          |          |          |       |          |          |          |          |          |
| 7 B                                                                                                                | 1.858951                                                                                                                                                                                                                                                                                                                                                                                                                                                                                                                                                                                                                                                                                                                                                                                                                                                                                                                                                                                                                                                                                                                                                                                                                                                                                                                                                                                                                                                                                                                                                                                                                                                                                                                                                                                                                                                                                                                                                  | 1.747177 | 1.746823 | 3.009102 | 3.008774 |   |   |     |          |  |  |  |  |     |          |          |  |  |  |     |          |          |          |  |  |      |          |          |          |          |  |     |          |          |          |          |          |      |          |          |          |          |          |     |          |          |          |          |          |     |          |          |          |          |          |     |          |          |          |          |          |      |          |          |          |          |          |       |          |          |          |          |          |  |   |   |   |   |    |      |          |  |  |  |  |     |          |          |  |  |  |     |          |          |          |  |  |     |          |          |          |          |  |      |          |          |          |          |          |       |          |          |          |          |          |
| 8 B                                                                                                                | 3.335364                                                                                                                                                                                                                                                                                                                                                                                                                                                                                                                                                                                                                                                                                                                                                                                                                                                                                                                                                                                                                                                                                                                                                                                                                                                                                                                                                                                                                                                                                                                                                                                                                                                                                                                                                                                                                                                                                                                                                  | 3.029565 | 3.029146 | 1.770920 | 1.770435 |   |   |     |          |  |  |  |  |     |          |          |  |  |  |     |          |          |          |  |  |      |          |          |          |          |  |     |          |          |          |          |          |      |          |          |          |          |          |     |          |          |          |          |          |     |          |          |          |          |          |     |          |          |          |          |          |      |          |          |          |          |          |       |          |          |          |          |          |  |   |   |   |   |    |      |          |  |  |  |  |     |          |          |  |  |  |     |          |          |          |  |  |     |          |          |          |          |  |      |          |          |          |          |          |       |          |          |          |          |          |
| 9 B                                                                                                                | 1.861215                                                                                                                                                                                                                                                                                                                                                                                                                                                                                                                                                                                                                                                                                                                                                                                                                                                                                                                                                                                                                                                                                                                                                                                                                                                                                                                                                                                                                                                                                                                                                                                                                                                                                                                                                                                                                                                                                                                                                  | 3.430447 | 1.723965 | 3.481265 | 1.781091 |   |   |     |          |  |  |  |  |     |          |          |  |  |  |     |          |          |          |  |  |      |          |          |          |          |  |     |          |          |          |          |          |      |          |          |          |          |          |     |          |          |          |          |          |     |          |          |          |          |          |     |          |          |          |          |          |      |          |          |          |          |          |       |          |          |          |          |          |  |   |   |   |   |    |      |          |  |  |  |  |     |          |          |  |  |  |     |          |          |          |  |  |     |          |          |          |          |  |      |          |          |          |          |          |       |          |          |          |          |          |
| 10 B                                                                                                               | 1.861273                                                                                                                                                                                                                                                                                                                                                                                                                                                                                                                                                                                                                                                                                                                                                                                                                                                                                                                                                                                                                                                                                                                                                                                                                                                                                                                                                                                                                                                                                                                                                                                                                                                                                                                                                                                                                                                                                                                                                  | 1.723513 | 3.430218 | 1.780308 | 3.482001 |   |   |     |          |  |  |  |  |     |          |          |  |  |  |     |          |          |          |  |  |      |          |          |          |          |  |     |          |          |          |          |          |      |          |          |          |          |          |     |          |          |          |          |          |     |          |          |          |          |          |     |          |          |          |          |          |      |          |          |          |          |          |       |          |          |          |          |          |  |   |   |   |   |    |      |          |  |  |  |  |     |          |          |  |  |  |     |          |          |          |  |  |     |          |          |          |          |  |      |          |          |          |          |          |       |          |          |          |          |          |
| 11 Ru                                                                                                              | 3.065508                                                                                                                                                                                                                                                                                                                                                                                                                                                                                                                                                                                                                                                                                                                                                                                                                                                                                                                                                                                                                                                                                                                                                                                                                                                                                                                                                                                                                                                                                                                                                                                                                                                                                                                                                                                                                                                                                                                                                  | 2.271873 | 2.274022 | 2.273057 | 2.274735 |   |   |     |          |  |  |  |  |     |          |          |  |  |  |     |          |          |          |  |  |      |          |          |          |          |  |     |          |          |          |          |          |      |          |          |          |          |          |     |          |          |          |          |          |     |          |          |          |          |          |     |          |          |          |          |          |      |          |          |          |          |          |       |          |          |          |          |          |  |   |   |   |   |    |      |          |  |  |  |  |     |          |          |  |  |  |     |          |          |          |  |  |     |          |          |          |          |  |      |          |          |          |          |          |       |          |          |          |          |          |
|                                                                                                                    | 6                                                                                                                                                                                                                                                                                                                                                                                                                                                                                                                                                                                                                                                                                                                                                                                                                                                                                                                                                                                                                                                                                                                                                                                                                                                                                                                                                                                                                                                                                                                                                                                                                                                                                                                                                                                                                                                                                                                                                         | 7        | 8        | 9        | 10       |   |   |     |          |  |  |  |  |     |          |          |  |  |  |     |          |          |          |  |  |      |          |          |          |          |  |     |          |          |          |          |          |      |          |          |          |          |          |     |          |          |          |          |          |     |          |          |          |          |          |     |          |          |          |          |          |      |          |          |          |          |          |       |          |          |          |          |          |  |   |   |   |   |    |      |          |  |  |  |  |     |          |          |  |  |  |     |          |          |          |  |  |     |          |          |          |          |  |      |          |          |          |          |          |       |          |          |          |          |          |
| 6 Ru                                                                                                               | 0.000000                                                                                                                                                                                                                                                                                                                                                                                                                                                                                                                                                                                                                                                                                                                                                                                                                                                                                                                                                                                                                                                                                                                                                                                                                                                                                                                                                                                                                                                                                                                                                                                                                                                                                                                                                                                                                                                                                                                                                  |          |          |          |          |   |   |     |          |  |  |  |  |     |          |          |  |  |  |     |          |          |          |  |  |      |          |          |          |          |  |     |          |          |          |          |          |      |          |          |          |          |          |     |          |          |          |          |          |     |          |          |          |          |          |     |          |          |          |          |          |      |          |          |          |          |          |       |          |          |          |          |          |  |   |   |   |   |    |      |          |  |  |  |  |     |          |          |  |  |  |     |          |          |          |  |  |     |          |          |          |          |  |      |          |          |          |          |          |       |          |          |          |          |          |
| 7 B                                                                                                                | 3.737459                                                                                                                                                                                                                                                                                                                                                                                                                                                                                                                                                                                                                                                                                                                                                                                                                                                                                                                                                                                                                                                                                                                                                                                                                                                                                                                                                                                                                                                                                                                                                                                                                                                                                                                                                                                                                                                                                                                                                  | 0.000000 |          |          |          |   |   |     |          |  |  |  |  |     |          |          |  |  |  |     |          |          |          |  |  |      |          |          |          |          |  |     |          |          |          |          |          |      |          |          |          |          |          |     |          |          |          |          |          |     |          |          |          |          |          |     |          |          |          |          |          |      |          |          |          |          |          |       |          |          |          |          |          |  |   |   |   |   |    |      |          |  |  |  |  |     |          |          |  |  |  |     |          |          |          |  |  |     |          |          |          |          |  |      |          |          |          |          |          |       |          |          |          |          |          |
| 8 B                                                                                                                | 2.123065                                                                                                                                                                                                                                                                                                                                                                                                                                                                                                                                                                                                                                                                                                                                                                                                                                                                                                                                                                                                                                                                                                                                                                                                                                                                                                                                                                                                                                                                                                                                                                                                                                                                                                                                                                                                                                                                                                                                                  | 3.514831 | 0.000000 |          |          |   |   |     |          |  |  |  |  |     |          |          |  |  |  |     |          |          |          |  |  |      |          |          |          |          |  |     |          |          |          |          |          |      |          |          |          |          |          |     |          |          |          |          |          |     |          |          |          |          |          |     |          |          |          |          |          |      |          |          |          |          |          |       |          |          |          |          |          |  |   |   |   |   |    |      |          |  |  |  |  |     |          |          |  |  |  |     |          |          |          |  |  |     |          |          |          |          |  |      |          |          |          |          |          |       |          |          |          |          |          |
| 9 B                                                                                                                | 2.046794                                                                                                                                                                                                                                                                                                                                                                                                                                                                                                                                                                                                                                                                                                                                                                                                                                                                                                                                                                                                                                                                                                                                                                                                                                                                                                                                                                                                                                                                                                                                                                                                                                                                                                                                                                                                                                                                                                                                                  | 2.981939 | 3.003754 | 0.000000 |          |   |   |     |          |  |  |  |  |     |          |          |  |  |  |     |          |          |          |  |  |      |          |          |          |          |  |     |          |          |          |          |          |      |          |          |          |          |          |     |          |          |          |          |          |     |          |          |          |          |          |     |          |          |          |          |          |      |          |          |          |          |          |       |          |          |          |          |          |  |   |   |   |   |    |      |          |  |  |  |  |     |          |          |  |  |  |     |          |          |          |  |  |     |          |          |          |          |  |      |          |          |          |          |          |       |          |          |          |          |          |
| 10 B                                                                                                               | 2.046985                                                                                                                                                                                                                                                                                                                                                                                                                                                                                                                                                                                                                                                                                                                                                                                                                                                                                                                                                                                                                                                                                                                                                                                                                                                                                                                                                                                                                                                                                                                                                                                                                                                                                                                                                                                                                                                                                                                                                  | 2.981721 | 3.004308 | 3.026906 | 0.000000 |   |   |     |          |  |  |  |  |     |          |          |  |  |  |     |          |          |          |  |  |      |          |          |          |          |  |     |          |          |          |          |          |      |          |          |          |          |          |     |          |          |          |          |          |     |          |          |          |          |          |     |          |          |          |          |          |      |          |          |          |          |          |       |          |          |          |          |          |  |   |   |   |   |    |      |          |  |  |  |  |     |          |          |  |  |  |     |          |          |          |  |  |     |          |          |          |          |  |      |          |          |          |          |          |       |          |          |          |          |          |
| 11 Ru                                                                                                              | 3.518155                                                                                                                                                                                                                                                                                                                                                                                                                                                                                                                                                                                                                                                                                                                                                                                                                                                                                                                                                                                                                                                                                                                                                                                                                                                                                                                                                                                                                                                                                                                                                                                                                                                                                                                                                                                                                                                                                                                                                  | 2.058582 | 2.139329 | 3.395998 | 3.394266 |   |   |     |          |  |  |  |  |     |          |          |  |  |  |     |          |          |          |  |  |      |          |          |          |          |  |     |          |          |          |          |          |      |          |          |          |          |          |     |          |          |          |          |          |     |          |          |          |          |          |     |          |          |          |          |          |      |          |          |          |          |          |       |          |          |          |          |          |  |   |   |   |   |    |      |          |  |  |  |  |     |          |          |  |  |  |     |          |          |          |  |  |     |          |          |          |          |  |      |          |          |          |          |          |       |          |          |          |          |          |
|  <p>11. -806.14813148 +23.6</p>  | <table border="1"> <thead> <tr> <th></th> <th>1</th> <th>2</th> <th>3</th> <th>4</th> <th>5</th> </tr> </thead> <tbody> <tr><td>1 B</td><td>0.000000</td><td></td><td></td><td></td><td></td></tr> <tr><td>2 B</td><td>1.822425</td><td>0.000000</td><td></td><td></td><td></td></tr> <tr><td>3 B</td><td>1.860846</td><td>2.780893</td><td>0.000000</td><td></td><td></td></tr> <tr><td>4 B</td><td>2.811431</td><td>2.686835</td><td>2.670265</td><td>0.000000</td><td></td></tr> <tr><td>5 B</td><td>2.978780</td><td>1.746235</td><td>3.324107</td><td>1.724956</td><td>0.000000</td></tr> <tr><td>6 Ru</td><td>3.579472</td><td>3.906784</td><td>2.246811</td><td>2.018559</td><td>3.306782</td></tr> <tr><td>7 B</td><td>3.878628</td><td>3.130103</td><td>3.276410</td><td>1.725694</td><td>1.800191</td></tr> <tr><td>8 B</td><td>1.783907</td><td>1.783371</td><td>2.837792</td><td>1.727664</td><td>1.863277</td></tr> <tr><td>9 B</td><td>1.767426</td><td>2.849302</td><td>1.764465</td><td>1.790225</td><td>2.973328</td></tr> <tr><td>10 B</td><td>1.719885</td><td>1.782284</td><td>1.790978</td><td>3.375611</td><td>3.064029</td></tr> <tr><td>11 Ru</td><td>3.140022</td><td>2.318870</td><td>2.449200</td><td>2.804505</td><td>2.296323</td></tr> <tr> <td></td> <td>6</td> <td>7</td> <td>8</td> <td>9</td> <td>10</td> </tr> <tr><td>6 Ru</td><td>0.000000</td><td></td><td></td><td></td><td></td></tr> <tr><td>7 B</td><td>2.207674</td><td>0.000000</td><td></td><td></td><td></td></tr> <tr><td>8 B</td><td>3.413646</td><td>3.077388</td><td>0.000000</td><td></td><td></td></tr> <tr><td>9 B</td><td>2.336209</td><td>3.243158</td><td>1.777738</td><td>0.000000</td><td></td></tr> <tr><td>10 B</td><td>3.645494</td><td>3.656680</td><td>2.910395</td><td>2.897138</td><td>0.000000</td></tr> <tr><td>11 Ru</td><td>2.859238</td><td>2.078411</td><td>3.290790</td><td>3.382989</td><td>2.057855</td></tr> </tbody> </table> |          | 1        | 2        | 3        | 4 | 5 | 1 B | 0.000000 |  |  |  |  | 2 B | 1.822425 | 0.000000 |  |  |  | 3 B | 1.860846 | 2.780893 | 0.000000 |  |  | 4 B  | 2.811431 | 2.686835 | 2.670265 | 0.000000 |  | 5 B | 2.978780 | 1.746235 | 3.324107 | 1.724956 | 0.000000 | 6 Ru | 3.579472 | 3.906784 | 2.246811 | 2.018559 | 3.306782 | 7 B | 3.878628 | 3.130103 | 3.276410 | 1.725694 | 1.800191 | 8 B | 1.783907 | 1.783371 | 2.837792 | 1.727664 | 1.863277 | 9 B | 1.767426 | 2.849302 | 1.764465 | 1.790225 | 2.973328 | 10 B | 1.719885 | 1.782284 | 1.790978 | 3.375611 | 3.064029 | 11 Ru | 3.140022 | 2.318870 | 2.449200 | 2.804505 | 2.296323 |  | 6 | 7 | 8 | 9 | 10 | 6 Ru | 0.000000 |  |  |  |  | 7 B | 2.207674 | 0.000000 |  |  |  | 8 B | 3.413646 | 3.077388 | 0.000000 |  |  | 9 B | 2.336209 | 3.243158 | 1.777738 | 0.000000 |  | 10 B | 3.645494 | 3.656680 | 2.910395 | 2.897138 | 0.000000 | 11 Ru | 2.859238 | 2.078411 | 3.290790 | 3.382989 | 2.057855 |
|                                                                                                                    | 1                                                                                                                                                                                                                                                                                                                                                                                                                                                                                                                                                                                                                                                                                                                                                                                                                                                                                                                                                                                                                                                                                                                                                                                                                                                                                                                                                                                                                                                                                                                                                                                                                                                                                                                                                                                                                                                                                                                                                         | 2        | 3        | 4        | 5        |   |   |     |          |  |  |  |  |     |          |          |  |  |  |     |          |          |          |  |  |      |          |          |          |          |  |     |          |          |          |          |          |      |          |          |          |          |          |     |          |          |          |          |          |     |          |          |          |          |          |     |          |          |          |          |          |      |          |          |          |          |          |       |          |          |          |          |          |  |   |   |   |   |    |      |          |  |  |  |  |     |          |          |  |  |  |     |          |          |          |  |  |     |          |          |          |          |  |      |          |          |          |          |          |       |          |          |          |          |          |
| 1 B                                                                                                                | 0.000000                                                                                                                                                                                                                                                                                                                                                                                                                                                                                                                                                                                                                                                                                                                                                                                                                                                                                                                                                                                                                                                                                                                                                                                                                                                                                                                                                                                                                                                                                                                                                                                                                                                                                                                                                                                                                                                                                                                                                  |          |          |          |          |   |   |     |          |  |  |  |  |     |          |          |  |  |  |     |          |          |          |  |  |      |          |          |          |          |  |     |          |          |          |          |          |      |          |          |          |          |          |     |          |          |          |          |          |     |          |          |          |          |          |     |          |          |          |          |          |      |          |          |          |          |          |       |          |          |          |          |          |  |   |   |   |   |    |      |          |  |  |  |  |     |          |          |  |  |  |     |          |          |          |  |  |     |          |          |          |          |  |      |          |          |          |          |          |       |          |          |          |          |          |
| 2 B                                                                                                                | 1.822425                                                                                                                                                                                                                                                                                                                                                                                                                                                                                                                                                                                                                                                                                                                                                                                                                                                                                                                                                                                                                                                                                                                                                                                                                                                                                                                                                                                                                                                                                                                                                                                                                                                                                                                                                                                                                                                                                                                                                  | 0.000000 |          |          |          |   |   |     |          |  |  |  |  |     |          |          |  |  |  |     |          |          |          |  |  |      |          |          |          |          |  |     |          |          |          |          |          |      |          |          |          |          |          |     |          |          |          |          |          |     |          |          |          |          |          |     |          |          |          |          |          |      |          |          |          |          |          |       |          |          |          |          |          |  |   |   |   |   |    |      |          |  |  |  |  |     |          |          |  |  |  |     |          |          |          |  |  |     |          |          |          |          |  |      |          |          |          |          |          |       |          |          |          |          |          |
| 3 B                                                                                                                | 1.860846                                                                                                                                                                                                                                                                                                                                                                                                                                                                                                                                                                                                                                                                                                                                                                                                                                                                                                                                                                                                                                                                                                                                                                                                                                                                                                                                                                                                                                                                                                                                                                                                                                                                                                                                                                                                                                                                                                                                                  | 2.780893 | 0.000000 |          |          |   |   |     |          |  |  |  |  |     |          |          |  |  |  |     |          |          |          |  |  |      |          |          |          |          |  |     |          |          |          |          |          |      |          |          |          |          |          |     |          |          |          |          |          |     |          |          |          |          |          |     |          |          |          |          |          |      |          |          |          |          |          |       |          |          |          |          |          |  |   |   |   |   |    |      |          |  |  |  |  |     |          |          |  |  |  |     |          |          |          |  |  |     |          |          |          |          |  |      |          |          |          |          |          |       |          |          |          |          |          |
| 4 B                                                                                                                | 2.811431                                                                                                                                                                                                                                                                                                                                                                                                                                                                                                                                                                                                                                                                                                                                                                                                                                                                                                                                                                                                                                                                                                                                                                                                                                                                                                                                                                                                                                                                                                                                                                                                                                                                                                                                                                                                                                                                                                                                                  | 2.686835 | 2.670265 | 0.000000 |          |   |   |     |          |  |  |  |  |     |          |          |  |  |  |     |          |          |          |  |  |      |          |          |          |          |  |     |          |          |          |          |          |      |          |          |          |          |          |     |          |          |          |          |          |     |          |          |          |          |          |     |          |          |          |          |          |      |          |          |          |          |          |       |          |          |          |          |          |  |   |   |   |   |    |      |          |  |  |  |  |     |          |          |  |  |  |     |          |          |          |  |  |     |          |          |          |          |  |      |          |          |          |          |          |       |          |          |          |          |          |
| 5 B                                                                                                                | 2.978780                                                                                                                                                                                                                                                                                                                                                                                                                                                                                                                                                                                                                                                                                                                                                                                                                                                                                                                                                                                                                                                                                                                                                                                                                                                                                                                                                                                                                                                                                                                                                                                                                                                                                                                                                                                                                                                                                                                                                  | 1.746235 | 3.324107 | 1.724956 | 0.000000 |   |   |     |          |  |  |  |  |     |          |          |  |  |  |     |          |          |          |  |  |      |          |          |          |          |  |     |          |          |          |          |          |      |          |          |          |          |          |     |          |          |          |          |          |     |          |          |          |          |          |     |          |          |          |          |          |      |          |          |          |          |          |       |          |          |          |          |          |  |   |   |   |   |    |      |          |  |  |  |  |     |          |          |  |  |  |     |          |          |          |  |  |     |          |          |          |          |  |      |          |          |          |          |          |       |          |          |          |          |          |
| 6 Ru                                                                                                               | 3.579472                                                                                                                                                                                                                                                                                                                                                                                                                                                                                                                                                                                                                                                                                                                                                                                                                                                                                                                                                                                                                                                                                                                                                                                                                                                                                                                                                                                                                                                                                                                                                                                                                                                                                                                                                                                                                                                                                                                                                  | 3.906784 | 2.246811 | 2.018559 | 3.306782 |   |   |     |          |  |  |  |  |     |          |          |  |  |  |     |          |          |          |  |  |      |          |          |          |          |  |     |          |          |          |          |          |      |          |          |          |          |          |     |          |          |          |          |          |     |          |          |          |          |          |     |          |          |          |          |          |      |          |          |          |          |          |       |          |          |          |          |          |  |   |   |   |   |    |      |          |  |  |  |  |     |          |          |  |  |  |     |          |          |          |  |  |     |          |          |          |          |  |      |          |          |          |          |          |       |          |          |          |          |          |
| 7 B                                                                                                                | 3.878628                                                                                                                                                                                                                                                                                                                                                                                                                                                                                                                                                                                                                                                                                                                                                                                                                                                                                                                                                                                                                                                                                                                                                                                                                                                                                                                                                                                                                                                                                                                                                                                                                                                                                                                                                                                                                                                                                                                                                  | 3.130103 | 3.276410 | 1.725694 | 1.800191 |   |   |     |          |  |  |  |  |     |          |          |  |  |  |     |          |          |          |  |  |      |          |          |          |          |  |     |          |          |          |          |          |      |          |          |          |          |          |     |          |          |          |          |          |     |          |          |          |          |          |     |          |          |          |          |          |      |          |          |          |          |          |       |          |          |          |          |          |  |   |   |   |   |    |      |          |  |  |  |  |     |          |          |  |  |  |     |          |          |          |  |  |     |          |          |          |          |  |      |          |          |          |          |          |       |          |          |          |          |          |
| 8 B                                                                                                                | 1.783907                                                                                                                                                                                                                                                                                                                                                                                                                                                                                                                                                                                                                                                                                                                                                                                                                                                                                                                                                                                                                                                                                                                                                                                                                                                                                                                                                                                                                                                                                                                                                                                                                                                                                                                                                                                                                                                                                                                                                  | 1.783371 | 2.837792 | 1.727664 | 1.863277 |   |   |     |          |  |  |  |  |     |          |          |  |  |  |     |          |          |          |  |  |      |          |          |          |          |  |     |          |          |          |          |          |      |          |          |          |          |          |     |          |          |          |          |          |     |          |          |          |          |          |     |          |          |          |          |          |      |          |          |          |          |          |       |          |          |          |          |          |  |   |   |   |   |    |      |          |  |  |  |  |     |          |          |  |  |  |     |          |          |          |  |  |     |          |          |          |          |  |      |          |          |          |          |          |       |          |          |          |          |          |
| 9 B                                                                                                                | 1.767426                                                                                                                                                                                                                                                                                                                                                                                                                                                                                                                                                                                                                                                                                                                                                                                                                                                                                                                                                                                                                                                                                                                                                                                                                                                                                                                                                                                                                                                                                                                                                                                                                                                                                                                                                                                                                                                                                                                                                  | 2.849302 | 1.764465 | 1.790225 | 2.973328 |   |   |     |          |  |  |  |  |     |          |          |  |  |  |     |          |          |          |  |  |      |          |          |          |          |  |     |          |          |          |          |          |      |          |          |          |          |          |     |          |          |          |          |          |     |          |          |          |          |          |     |          |          |          |          |          |      |          |          |          |          |          |       |          |          |          |          |          |  |   |   |   |   |    |      |          |  |  |  |  |     |          |          |  |  |  |     |          |          |          |  |  |     |          |          |          |          |  |      |          |          |          |          |          |       |          |          |          |          |          |
| 10 B                                                                                                               | 1.719885                                                                                                                                                                                                                                                                                                                                                                                                                                                                                                                                                                                                                                                                                                                                                                                                                                                                                                                                                                                                                                                                                                                                                                                                                                                                                                                                                                                                                                                                                                                                                                                                                                                                                                                                                                                                                                                                                                                                                  | 1.782284 | 1.790978 | 3.375611 | 3.064029 |   |   |     |          |  |  |  |  |     |          |          |  |  |  |     |          |          |          |  |  |      |          |          |          |          |  |     |          |          |          |          |          |      |          |          |          |          |          |     |          |          |          |          |          |     |          |          |          |          |          |     |          |          |          |          |          |      |          |          |          |          |          |       |          |          |          |          |          |  |   |   |   |   |    |      |          |  |  |  |  |     |          |          |  |  |  |     |          |          |          |  |  |     |          |          |          |          |  |      |          |          |          |          |          |       |          |          |          |          |          |
| 11 Ru                                                                                                              | 3.140022                                                                                                                                                                                                                                                                                                                                                                                                                                                                                                                                                                                                                                                                                                                                                                                                                                                                                                                                                                                                                                                                                                                                                                                                                                                                                                                                                                                                                                                                                                                                                                                                                                                                                                                                                                                                                                                                                                                                                  | 2.318870 | 2.449200 | 2.804505 | 2.296323 |   |   |     |          |  |  |  |  |     |          |          |  |  |  |     |          |          |          |  |  |      |          |          |          |          |  |     |          |          |          |          |          |      |          |          |          |          |          |     |          |          |          |          |          |     |          |          |          |          |          |     |          |          |          |          |          |      |          |          |          |          |          |       |          |          |          |          |          |  |   |   |   |   |    |      |          |  |  |  |  |     |          |          |  |  |  |     |          |          |          |  |  |     |          |          |          |          |  |      |          |          |          |          |          |       |          |          |          |          |          |
|                                                                                                                    | 6                                                                                                                                                                                                                                                                                                                                                                                                                                                                                                                                                                                                                                                                                                                                                                                                                                                                                                                                                                                                                                                                                                                                                                                                                                                                                                                                                                                                                                                                                                                                                                                                                                                                                                                                                                                                                                                                                                                                                         | 7        | 8        | 9        | 10       |   |   |     |          |  |  |  |  |     |          |          |  |  |  |     |          |          |          |  |  |      |          |          |          |          |  |     |          |          |          |          |          |      |          |          |          |          |          |     |          |          |          |          |          |     |          |          |          |          |          |     |          |          |          |          |          |      |          |          |          |          |          |       |          |          |          |          |          |  |   |   |   |   |    |      |          |  |  |  |  |     |          |          |  |  |  |     |          |          |          |  |  |     |          |          |          |          |  |      |          |          |          |          |          |       |          |          |          |          |          |
| 6 Ru                                                                                                               | 0.000000                                                                                                                                                                                                                                                                                                                                                                                                                                                                                                                                                                                                                                                                                                                                                                                                                                                                                                                                                                                                                                                                                                                                                                                                                                                                                                                                                                                                                                                                                                                                                                                                                                                                                                                                                                                                                                                                                                                                                  |          |          |          |          |   |   |     |          |  |  |  |  |     |          |          |  |  |  |     |          |          |          |  |  |      |          |          |          |          |  |     |          |          |          |          |          |      |          |          |          |          |          |     |          |          |          |          |          |     |          |          |          |          |          |     |          |          |          |          |          |      |          |          |          |          |          |       |          |          |          |          |          |  |   |   |   |   |    |      |          |  |  |  |  |     |          |          |  |  |  |     |          |          |          |  |  |     |          |          |          |          |  |      |          |          |          |          |          |       |          |          |          |          |          |
| 7 B                                                                                                                | 2.207674                                                                                                                                                                                                                                                                                                                                                                                                                                                                                                                                                                                                                                                                                                                                                                                                                                                                                                                                                                                                                                                                                                                                                                                                                                                                                                                                                                                                                                                                                                                                                                                                                                                                                                                                                                                                                                                                                                                                                  | 0.000000 |          |          |          |   |   |     |          |  |  |  |  |     |          |          |  |  |  |     |          |          |          |  |  |      |          |          |          |          |  |     |          |          |          |          |          |      |          |          |          |          |          |     |          |          |          |          |          |     |          |          |          |          |          |     |          |          |          |          |          |      |          |          |          |          |          |       |          |          |          |          |          |  |   |   |   |   |    |      |          |  |  |  |  |     |          |          |  |  |  |     |          |          |          |  |  |     |          |          |          |          |  |      |          |          |          |          |          |       |          |          |          |          |          |
| 8 B                                                                                                                | 3.413646                                                                                                                                                                                                                                                                                                                                                                                                                                                                                                                                                                                                                                                                                                                                                                                                                                                                                                                                                                                                                                                                                                                                                                                                                                                                                                                                                                                                                                                                                                                                                                                                                                                                                                                                                                                                                                                                                                                                                  | 3.077388 | 0.000000 |          |          |   |   |     |          |  |  |  |  |     |          |          |  |  |  |     |          |          |          |  |  |      |          |          |          |          |  |     |          |          |          |          |          |      |          |          |          |          |          |     |          |          |          |          |          |     |          |          |          |          |          |     |          |          |          |          |          |      |          |          |          |          |          |       |          |          |          |          |          |  |   |   |   |   |    |      |          |  |  |  |  |     |          |          |  |  |  |     |          |          |          |  |  |     |          |          |          |          |  |      |          |          |          |          |          |       |          |          |          |          |          |
| 9 B                                                                                                                | 2.336209                                                                                                                                                                                                                                                                                                                                                                                                                                                                                                                                                                                                                                                                                                                                                                                                                                                                                                                                                                                                                                                                                                                                                                                                                                                                                                                                                                                                                                                                                                                                                                                                                                                                                                                                                                                                                                                                                                                                                  | 3.243158 | 1.777738 | 0.000000 |          |   |   |     |          |  |  |  |  |     |          |          |  |  |  |     |          |          |          |  |  |      |          |          |          |          |  |     |          |          |          |          |          |      |          |          |          |          |          |     |          |          |          |          |          |     |          |          |          |          |          |     |          |          |          |          |          |      |          |          |          |          |          |       |          |          |          |          |          |  |   |   |   |   |    |      |          |  |  |  |  |     |          |          |  |  |  |     |          |          |          |  |  |     |          |          |          |          |  |      |          |          |          |          |          |       |          |          |          |          |          |
| 10 B                                                                                                               | 3.645494                                                                                                                                                                                                                                                                                                                                                                                                                                                                                                                                                                                                                                                                                                                                                                                                                                                                                                                                                                                                                                                                                                                                                                                                                                                                                                                                                                                                                                                                                                                                                                                                                                                                                                                                                                                                                                                                                                                                                  | 3.656680 | 2.910395 | 2.897138 | 0.000000 |   |   |     |          |  |  |  |  |     |          |          |  |  |  |     |          |          |          |  |  |      |          |          |          |          |  |     |          |          |          |          |          |      |          |          |          |          |          |     |          |          |          |          |          |     |          |          |          |          |          |     |          |          |          |          |          |      |          |          |          |          |          |       |          |          |          |          |          |  |   |   |   |   |    |      |          |  |  |  |  |     |          |          |  |  |  |     |          |          |          |  |  |     |          |          |          |          |  |      |          |          |          |          |          |       |          |          |          |          |          |
| 11 Ru                                                                                                              | 2.859238                                                                                                                                                                                                                                                                                                                                                                                                                                                                                                                                                                                                                                                                                                                                                                                                                                                                                                                                                                                                                                                                                                                                                                                                                                                                                                                                                                                                                                                                                                                                                                                                                                                                                                                                                                                                                                                                                                                                                  | 2.078411 | 3.290790 | 3.382989 | 2.057855 |   |   |     |          |  |  |  |  |     |          |          |  |  |  |     |          |          |          |  |  |      |          |          |          |          |  |     |          |          |          |          |          |      |          |          |          |          |          |     |          |          |          |          |          |     |          |          |          |          |          |     |          |          |          |          |          |      |          |          |          |          |          |       |          |          |          |          |          |  |   |   |   |   |    |      |          |  |  |  |  |     |          |          |  |  |  |     |          |          |          |  |  |     |          |          |          |          |  |      |          |          |          |          |          |       |          |          |          |          |          |
|  <p>12. -806.14736585 +24.1</p> | <table border="1"> <thead> <tr> <th></th> <th>1</th> <th>2</th> <th>3</th> <th>4</th> <th>5</th> </tr> </thead> <tbody> <tr><td>1 B</td><td>0.000000</td><td></td><td></td><td></td><td></td></tr> <tr><td>2 B</td><td>2.142265</td><td>0.000000</td><td></td><td></td><td></td></tr> <tr><td>3 B</td><td>2.759444</td><td>1.961714</td><td>0.000000</td><td></td><td></td></tr> <tr><td>4 Ru</td><td>3.349850</td><td>2.373084</td><td>3.191105</td><td>0.000000</td><td></td></tr> <tr><td>5 B</td><td>2.862749</td><td>2.574724</td><td>1.783076</td><td>2.267397</td><td>0.000000</td></tr> <tr><td>6 Ru</td><td>2.193522</td><td>3.267253</td><td>3.451070</td><td>2.746056</td><td>2.251602</td></tr> <tr><td>7 B</td><td>1.664767</td><td>1.822875</td><td>1.682462</td><td>3.779966</td><td>2.811111</td></tr> <tr><td>8 B</td><td>3.760855</td><td>3.700126</td><td>3.435746</td><td>2.160192</td><td>1.672659</td></tr> <tr><td>9 B</td><td>1.790396</td><td>2.683003</td><td>1.861939</td><td>3.539251</td><td>1.852737</td></tr> <tr><td>10 B</td><td>1.837769</td><td>1.975536</td><td>3.363619</td><td>2.039246</td><td>2.916454</td></tr> <tr><td>11 B</td><td>3.480721</td><td>1.886708</td><td>1.716668</td><td>2.006342</td><td>1.832718</td></tr> <tr> <td></td> <td>6</td> <td>7</td> <td>8</td> <td>9</td> <td>10</td> </tr> <tr><td>6 Ru</td><td>0.000000</td><td></td><td></td><td></td><td></td></tr> <tr><td>7 B</td><td>3.365101</td><td>0.000000</td><td></td><td></td><td></td></tr> <tr><td>8 B</td><td>2.104023</td><td>4.267275</td><td>0.000000</td><td></td><td></td></tr> <tr><td>9 B</td><td>2.232985</td><td>1.722412</td><td>3.119024</td><td>0.000000</td><td></td></tr> <tr><td>10 B</td><td>2.136665</td><td>2.943004</td><td>3.204533</td><td>3.001463</td><td>0.000000</td></tr> <tr><td>11 B</td><td>3.614198</td><td>2.951260</td><td>2.912504</td><td>3.056011</td><td>3.102708</td></tr> </tbody> </table>  |          | 1        | 2        | 3        | 4 | 5 | 1 B | 0.000000 |  |  |  |  | 2 B | 2.142265 | 0.000000 |  |  |  | 3 B | 2.759444 | 1.961714 | 0.000000 |  |  | 4 Ru | 3.349850 | 2.373084 | 3.191105 | 0.000000 |  | 5 B | 2.862749 | 2.574724 | 1.783076 | 2.267397 | 0.000000 | 6 Ru | 2.193522 | 3.267253 | 3.451070 | 2.746056 | 2.251602 | 7 B | 1.664767 | 1.822875 | 1.682462 | 3.779966 | 2.811111 | 8 B | 3.760855 | 3.700126 | 3.435746 | 2.160192 | 1.672659 | 9 B | 1.790396 | 2.683003 | 1.861939 | 3.539251 | 1.852737 | 10 B | 1.837769 | 1.975536 | 3.363619 | 2.039246 | 2.916454 | 11 B  | 3.480721 | 1.886708 | 1.716668 | 2.006342 | 1.832718 |  | 6 | 7 | 8 | 9 | 10 | 6 Ru | 0.000000 |  |  |  |  | 7 B | 3.365101 | 0.000000 |  |  |  | 8 B | 2.104023 | 4.267275 | 0.000000 |  |  | 9 B | 2.232985 | 1.722412 | 3.119024 | 0.000000 |  | 10 B | 2.136665 | 2.943004 | 3.204533 | 3.001463 | 0.000000 | 11 B  | 3.614198 | 2.951260 | 2.912504 | 3.056011 | 3.102708 |
|                                                                                                                    | 1                                                                                                                                                                                                                                                                                                                                                                                                                                                                                                                                                                                                                                                                                                                                                                                                                                                                                                                                                                                                                                                                                                                                                                                                                                                                                                                                                                                                                                                                                                                                                                                                                                                                                                                                                                                                                                                                                                                                                         | 2        | 3        | 4        | 5        |   |   |     |          |  |  |  |  |     |          |          |  |  |  |     |          |          |          |  |  |      |          |          |          |          |  |     |          |          |          |          |          |      |          |          |          |          |          |     |          |          |          |          |          |     |          |          |          |          |          |     |          |          |          |          |          |      |          |          |          |          |          |       |          |          |          |          |          |  |   |   |   |   |    |      |          |  |  |  |  |     |          |          |  |  |  |     |          |          |          |  |  |     |          |          |          |          |  |      |          |          |          |          |          |       |          |          |          |          |          |
| 1 B                                                                                                                | 0.000000                                                                                                                                                                                                                                                                                                                                                                                                                                                                                                                                                                                                                                                                                                                                                                                                                                                                                                                                                                                                                                                                                                                                                                                                                                                                                                                                                                                                                                                                                                                                                                                                                                                                                                                                                                                                                                                                                                                                                  |          |          |          |          |   |   |     |          |  |  |  |  |     |          |          |  |  |  |     |          |          |          |  |  |      |          |          |          |          |  |     |          |          |          |          |          |      |          |          |          |          |          |     |          |          |          |          |          |     |          |          |          |          |          |     |          |          |          |          |          |      |          |          |          |          |          |       |          |          |          |          |          |  |   |   |   |   |    |      |          |  |  |  |  |     |          |          |  |  |  |     |          |          |          |  |  |     |          |          |          |          |  |      |          |          |          |          |          |       |          |          |          |          |          |
| 2 B                                                                                                                | 2.142265                                                                                                                                                                                                                                                                                                                                                                                                                                                                                                                                                                                                                                                                                                                                                                                                                                                                                                                                                                                                                                                                                                                                                                                                                                                                                                                                                                                                                                                                                                                                                                                                                                                                                                                                                                                                                                                                                                                                                  | 0.000000 |          |          |          |   |   |     |          |  |  |  |  |     |          |          |  |  |  |     |          |          |          |  |  |      |          |          |          |          |  |     |          |          |          |          |          |      |          |          |          |          |          |     |          |          |          |          |          |     |          |          |          |          |          |     |          |          |          |          |          |      |          |          |          |          |          |       |          |          |          |          |          |  |   |   |   |   |    |      |          |  |  |  |  |     |          |          |  |  |  |     |          |          |          |  |  |     |          |          |          |          |  |      |          |          |          |          |          |       |          |          |          |          |          |
| 3 B                                                                                                                | 2.759444                                                                                                                                                                                                                                                                                                                                                                                                                                                                                                                                                                                                                                                                                                                                                                                                                                                                                                                                                                                                                                                                                                                                                                                                                                                                                                                                                                                                                                                                                                                                                                                                                                                                                                                                                                                                                                                                                                                                                  | 1.961714 | 0.000000 |          |          |   |   |     |          |  |  |  |  |     |          |          |  |  |  |     |          |          |          |  |  |      |          |          |          |          |  |     |          |          |          |          |          |      |          |          |          |          |          |     |          |          |          |          |          |     |          |          |          |          |          |     |          |          |          |          |          |      |          |          |          |          |          |       |          |          |          |          |          |  |   |   |   |   |    |      |          |  |  |  |  |     |          |          |  |  |  |     |          |          |          |  |  |     |          |          |          |          |  |      |          |          |          |          |          |       |          |          |          |          |          |
| 4 Ru                                                                                                               | 3.349850                                                                                                                                                                                                                                                                                                                                                                                                                                                                                                                                                                                                                                                                                                                                                                                                                                                                                                                                                                                                                                                                                                                                                                                                                                                                                                                                                                                                                                                                                                                                                                                                                                                                                                                                                                                                                                                                                                                                                  | 2.373084 | 3.191105 | 0.000000 |          |   |   |     |          |  |  |  |  |     |          |          |  |  |  |     |          |          |          |  |  |      |          |          |          |          |  |     |          |          |          |          |          |      |          |          |          |          |          |     |          |          |          |          |          |     |          |          |          |          |          |     |          |          |          |          |          |      |          |          |          |          |          |       |          |          |          |          |          |  |   |   |   |   |    |      |          |  |  |  |  |     |          |          |  |  |  |     |          |          |          |  |  |     |          |          |          |          |  |      |          |          |          |          |          |       |          |          |          |          |          |
| 5 B                                                                                                                | 2.862749                                                                                                                                                                                                                                                                                                                                                                                                                                                                                                                                                                                                                                                                                                                                                                                                                                                                                                                                                                                                                                                                                                                                                                                                                                                                                                                                                                                                                                                                                                                                                                                                                                                                                                                                                                                                                                                                                                                                                  | 2.574724 | 1.783076 | 2.267397 | 0.000000 |   |   |     |          |  |  |  |  |     |          |          |  |  |  |     |          |          |          |  |  |      |          |          |          |          |  |     |          |          |          |          |          |      |          |          |          |          |          |     |          |          |          |          |          |     |          |          |          |          |          |     |          |          |          |          |          |      |          |          |          |          |          |       |          |          |          |          |          |  |   |   |   |   |    |      |          |  |  |  |  |     |          |          |  |  |  |     |          |          |          |  |  |     |          |          |          |          |  |      |          |          |          |          |          |       |          |          |          |          |          |
| 6 Ru                                                                                                               | 2.193522                                                                                                                                                                                                                                                                                                                                                                                                                                                                                                                                                                                                                                                                                                                                                                                                                                                                                                                                                                                                                                                                                                                                                                                                                                                                                                                                                                                                                                                                                                                                                                                                                                                                                                                                                                                                                                                                                                                                                  | 3.267253 | 3.451070 | 2.746056 | 2.251602 |   |   |     |          |  |  |  |  |     |          |          |  |  |  |     |          |          |          |  |  |      |          |          |          |          |  |     |          |          |          |          |          |      |          |          |          |          |          |     |          |          |          |          |          |     |          |          |          |          |          |     |          |          |          |          |          |      |          |          |          |          |          |       |          |          |          |          |          |  |   |   |   |   |    |      |          |  |  |  |  |     |          |          |  |  |  |     |          |          |          |  |  |     |          |          |          |          |  |      |          |          |          |          |          |       |          |          |          |          |          |
| 7 B                                                                                                                | 1.664767                                                                                                                                                                                                                                                                                                                                                                                                                                                                                                                                                                                                                                                                                                                                                                                                                                                                                                                                                                                                                                                                                                                                                                                                                                                                                                                                                                                                                                                                                                                                                                                                                                                                                                                                                                                                                                                                                                                                                  | 1.822875 | 1.682462 | 3.779966 | 2.811111 |   |   |     |          |  |  |  |  |     |          |          |  |  |  |     |          |          |          |  |  |      |          |          |          |          |  |     |          |          |          |          |          |      |          |          |          |          |          |     |          |          |          |          |          |     |          |          |          |          |          |     |          |          |          |          |          |      |          |          |          |          |          |       |          |          |          |          |          |  |   |   |   |   |    |      |          |  |  |  |  |     |          |          |  |  |  |     |          |          |          |  |  |     |          |          |          |          |  |      |          |          |          |          |          |       |          |          |          |          |          |
| 8 B                                                                                                                | 3.760855                                                                                                                                                                                                                                                                                                                                                                                                                                                                                                                                                                                                                                                                                                                                                                                                                                                                                                                                                                                                                                                                                                                                                                                                                                                                                                                                                                                                                                                                                                                                                                                                                                                                                                                                                                                                                                                                                                                                                  | 3.700126 | 3.435746 | 2.160192 | 1.672659 |   |   |     |          |  |  |  |  |     |          |          |  |  |  |     |          |          |          |  |  |      |          |          |          |          |  |     |          |          |          |          |          |      |          |          |          |          |          |     |          |          |          |          |          |     |          |          |          |          |          |     |          |          |          |          |          |      |          |          |          |          |          |       |          |          |          |          |          |  |   |   |   |   |    |      |          |  |  |  |  |     |          |          |  |  |  |     |          |          |          |  |  |     |          |          |          |          |  |      |          |          |          |          |          |       |          |          |          |          |          |
| 9 B                                                                                                                | 1.790396                                                                                                                                                                                                                                                                                                                                                                                                                                                                                                                                                                                                                                                                                                                                                                                                                                                                                                                                                                                                                                                                                                                                                                                                                                                                                                                                                                                                                                                                                                                                                                                                                                                                                                                                                                                                                                                                                                                                                  | 2.683003 | 1.861939 | 3.539251 | 1.852737 |   |   |     |          |  |  |  |  |     |          |          |  |  |  |     |          |          |          |  |  |      |          |          |          |          |  |     |          |          |          |          |          |      |          |          |          |          |          |     |          |          |          |          |          |     |          |          |          |          |          |     |          |          |          |          |          |      |          |          |          |          |          |       |          |          |          |          |          |  |   |   |   |   |    |      |          |  |  |  |  |     |          |          |  |  |  |     |          |          |          |  |  |     |          |          |          |          |  |      |          |          |          |          |          |       |          |          |          |          |          |
| 10 B                                                                                                               | 1.837769                                                                                                                                                                                                                                                                                                                                                                                                                                                                                                                                                                                                                                                                                                                                                                                                                                                                                                                                                                                                                                                                                                                                                                                                                                                                                                                                                                                                                                                                                                                                                                                                                                                                                                                                                                                                                                                                                                                                                  | 1.975536 | 3.363619 | 2.039246 | 2.916454 |   |   |     |          |  |  |  |  |     |          |          |  |  |  |     |          |          |          |  |  |      |          |          |          |          |  |     |          |          |          |          |          |      |          |          |          |          |          |     |          |          |          |          |          |     |          |          |          |          |          |     |          |          |          |          |          |      |          |          |          |          |          |       |          |          |          |          |          |  |   |   |   |   |    |      |          |  |  |  |  |     |          |          |  |  |  |     |          |          |          |  |  |     |          |          |          |          |  |      |          |          |          |          |          |       |          |          |          |          |          |
| 11 B                                                                                                               | 3.480721                                                                                                                                                                                                                                                                                                                                                                                                                                                                                                                                                                                                                                                                                                                                                                                                                                                                                                                                                                                                                                                                                                                                                                                                                                                                                                                                                                                                                                                                                                                                                                                                                                                                                                                                                                                                                                                                                                                                                  | 1.886708 | 1.716668 | 2.006342 | 1.832718 |   |   |     |          |  |  |  |  |     |          |          |  |  |  |     |          |          |          |  |  |      |          |          |          |          |  |     |          |          |          |          |          |      |          |          |          |          |          |     |          |          |          |          |          |     |          |          |          |          |          |     |          |          |          |          |          |      |          |          |          |          |          |       |          |          |          |          |          |  |   |   |   |   |    |      |          |  |  |  |  |     |          |          |  |  |  |     |          |          |          |  |  |     |          |          |          |          |  |      |          |          |          |          |          |       |          |          |          |          |          |
|                                                                                                                    | 6                                                                                                                                                                                                                                                                                                                                                                                                                                                                                                                                                                                                                                                                                                                                                                                                                                                                                                                                                                                                                                                                                                                                                                                                                                                                                                                                                                                                                                                                                                                                                                                                                                                                                                                                                                                                                                                                                                                                                         | 7        | 8        | 9        | 10       |   |   |     |          |  |  |  |  |     |          |          |  |  |  |     |          |          |          |  |  |      |          |          |          |          |  |     |          |          |          |          |          |      |          |          |          |          |          |     |          |          |          |          |          |     |          |          |          |          |          |     |          |          |          |          |          |      |          |          |          |          |          |       |          |          |          |          |          |  |   |   |   |   |    |      |          |  |  |  |  |     |          |          |  |  |  |     |          |          |          |  |  |     |          |          |          |          |  |      |          |          |          |          |          |       |          |          |          |          |          |
| 6 Ru                                                                                                               | 0.000000                                                                                                                                                                                                                                                                                                                                                                                                                                                                                                                                                                                                                                                                                                                                                                                                                                                                                                                                                                                                                                                                                                                                                                                                                                                                                                                                                                                                                                                                                                                                                                                                                                                                                                                                                                                                                                                                                                                                                  |          |          |          |          |   |   |     |          |  |  |  |  |     |          |          |  |  |  |     |          |          |          |  |  |      |          |          |          |          |  |     |          |          |          |          |          |      |          |          |          |          |          |     |          |          |          |          |          |     |          |          |          |          |          |     |          |          |          |          |          |      |          |          |          |          |          |       |          |          |          |          |          |  |   |   |   |   |    |      |          |  |  |  |  |     |          |          |  |  |  |     |          |          |          |  |  |     |          |          |          |          |  |      |          |          |          |          |          |       |          |          |          |          |          |
| 7 B                                                                                                                | 3.365101                                                                                                                                                                                                                                                                                                                                                                                                                                                                                                                                                                                                                                                                                                                                                                                                                                                                                                                                                                                                                                                                                                                                                                                                                                                                                                                                                                                                                                                                                                                                                                                                                                                                                                                                                                                                                                                                                                                                                  | 0.000000 |          |          |          |   |   |     |          |  |  |  |  |     |          |          |  |  |  |     |          |          |          |  |  |      |          |          |          |          |  |     |          |          |          |          |          |      |          |          |          |          |          |     |          |          |          |          |          |     |          |          |          |          |          |     |          |          |          |          |          |      |          |          |          |          |          |       |          |          |          |          |          |  |   |   |   |   |    |      |          |  |  |  |  |     |          |          |  |  |  |     |          |          |          |  |  |     |          |          |          |          |  |      |          |          |          |          |          |       |          |          |          |          |          |
| 8 B                                                                                                                | 2.104023                                                                                                                                                                                                                                                                                                                                                                                                                                                                                                                                                                                                                                                                                                                                                                                                                                                                                                                                                                                                                                                                                                                                                                                                                                                                                                                                                                                                                                                                                                                                                                                                                                                                                                                                                                                                                                                                                                                                                  | 4.267275 | 0.000000 |          |          |   |   |     |          |  |  |  |  |     |          |          |  |  |  |     |          |          |          |  |  |      |          |          |          |          |  |     |          |          |          |          |          |      |          |          |          |          |          |     |          |          |          |          |          |     |          |          |          |          |          |     |          |          |          |          |          |      |          |          |          |          |          |       |          |          |          |          |          |  |   |   |   |   |    |      |          |  |  |  |  |     |          |          |  |  |  |     |          |          |          |  |  |     |          |          |          |          |  |      |          |          |          |          |          |       |          |          |          |          |          |
| 9 B                                                                                                                | 2.232985                                                                                                                                                                                                                                                                                                                                                                                                                                                                                                                                                                                                                                                                                                                                                                                                                                                                                                                                                                                                                                                                                                                                                                                                                                                                                                                                                                                                                                                                                                                                                                                                                                                                                                                                                                                                                                                                                                                                                  | 1.722412 | 3.119024 | 0.000000 |          |   |   |     |          |  |  |  |  |     |          |          |  |  |  |     |          |          |          |  |  |      |          |          |          |          |  |     |          |          |          |          |          |      |          |          |          |          |          |     |          |          |          |          |          |     |          |          |          |          |          |     |          |          |          |          |          |      |          |          |          |          |          |       |          |          |          |          |          |  |   |   |   |   |    |      |          |  |  |  |  |     |          |          |  |  |  |     |          |          |          |  |  |     |          |          |          |          |  |      |          |          |          |          |          |       |          |          |          |          |          |
| 10 B                                                                                                               | 2.136665                                                                                                                                                                                                                                                                                                                                                                                                                                                                                                                                                                                                                                                                                                                                                                                                                                                                                                                                                                                                                                                                                                                                                                                                                                                                                                                                                                                                                                                                                                                                                                                                                                                                                                                                                                                                                                                                                                                                                  | 2.943004 | 3.204533 | 3.001463 | 0.000000 |   |   |     |          |  |  |  |  |     |          |          |  |  |  |     |          |          |          |  |  |      |          |          |          |          |  |     |          |          |          |          |          |      |          |          |          |          |          |     |          |          |          |          |          |     |          |          |          |          |          |     |          |          |          |          |          |      |          |          |          |          |          |       |          |          |          |          |          |  |   |   |   |   |    |      |          |  |  |  |  |     |          |          |  |  |  |     |          |          |          |  |  |     |          |          |          |          |  |      |          |          |          |          |          |       |          |          |          |          |          |
| 11 B                                                                                                               | 3.614198                                                                                                                                                                                                                                                                                                                                                                                                                                                                                                                                                                                                                                                                                                                                                                                                                                                                                                                                                                                                                                                                                                                                                                                                                                                                                                                                                                                                                                                                                                                                                                                                                                                                                                                                                                                                                                                                                                                                                  | 2.951260 | 2.912504 | 3.056011 | 3.102708 |   |   |     |          |  |  |  |  |     |          |          |  |  |  |     |          |          |          |  |  |      |          |          |          |          |  |     |          |          |          |          |          |      |          |          |          |          |          |     |          |          |          |          |          |     |          |          |          |          |          |     |          |          |          |          |          |      |          |          |          |          |          |       |          |          |          |          |          |  |   |   |   |   |    |      |          |  |  |  |  |     |          |          |  |  |  |     |          |          |          |  |  |     |          |          |          |          |  |      |          |          |          |          |          |       |          |          |          |          |          |

| 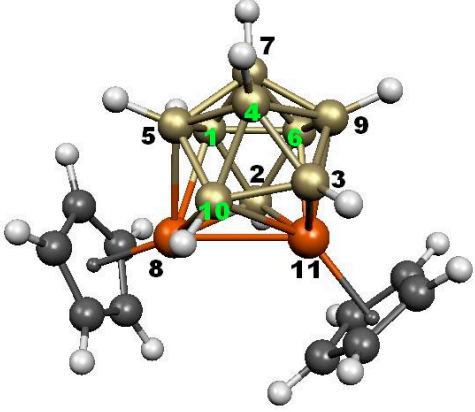 <p>13. -806.14064632 +28.3</p>  | <table border="1"> <thead> <tr> <th></th> <th>1</th> <th>2</th> <th>3</th> <th>4</th> <th>5</th> </tr> </thead> <tbody> <tr><td>1 B</td><td>0.000000</td><td></td><td></td><td></td><td></td></tr> <tr><td>2 B</td><td>1.792879</td><td>0.000000</td><td></td><td></td><td></td></tr> <tr><td>3 B</td><td>3.673029</td><td>3.697371</td><td>0.000000</td><td></td><td></td></tr> <tr><td>4 B</td><td>2.979997</td><td>3.838559</td><td>1.726641</td><td>0.000000</td><td></td></tr> <tr><td>5 B</td><td>1.836357</td><td>3.088636</td><td>2.902350</td><td>1.793167</td><td>0.000000</td></tr> <tr><td>6 B</td><td>1.772412</td><td>1.768003</td><td>3.067473</td><td>2.928075</td><td>2.852176</td></tr> <tr><td>7 B</td><td>1.751732</td><td>3.005162</td><td>2.912726</td><td>1.770493</td><td>1.770252</td></tr> <tr><td>8 Ru</td><td>2.338245</td><td>2.169065</td><td>3.496517</td><td>3.509365</td><td>2.306143</td></tr> <tr><td>9 B</td><td>2.878520</td><td>3.119457</td><td>1.757138</td><td>1.815051</td><td>2.829090</td></tr> <tr><td>10 B</td><td>2.979723</td><td>3.284841</td><td>1.747307</td><td>1.835990</td><td>1.783792</td></tr> <tr><td>11 Ru</td><td>3.064900</td><td>2.115772</td><td>2.078661</td><td>3.119447</td><td>3.267443</td></tr> <tr> <td></td> <td>6</td> <td>7</td> <td>8</td> <td>9</td> <td>10</td> </tr> <tr><td>6 B</td><td>0.000000</td><td></td><td></td><td></td><td></td></tr> <tr><td>7 B</td><td>1.796557</td><td>0.000000</td><td></td><td></td><td></td></tr> <tr><td>8 Ru</td><td>3.253746</td><td>3.441954</td><td>0.000000</td><td></td><td></td></tr> <tr><td>9 B</td><td>1.749122</td><td>1.793285</td><td>3.806012</td><td>0.000000</td><td></td></tr> <tr><td>10 B</td><td>3.284075</td><td>2.837452</td><td>2.150844</td><td>2.727999</td><td>0.000000</td></tr> <tr><td>11 Ru</td><td>2.322499</td><td>3.269447</td><td>2.586721</td><td>2.321090</td><td>2.367197</td></tr> </tbody> </table> |          | 1        | 2        | 3        | 4 | 5 | 1 B | 0.000000 |  |  |  |  | 2 B | 1.792879 | 0.000000 |  |  |  | 3 B  | 3.673029 | 3.697371 | 0.000000 |  |  | 4 B | 2.979997 | 3.838559 | 1.726641 | 0.000000 |  | 5 B | 1.836357 | 3.088636 | 2.902350 | 1.793167 | 0.000000 | 6 B  | 1.772412 | 1.768003 | 3.067473 | 2.928075 | 2.852176 | 7 B | 1.751732 | 3.005162 | 2.912726 | 1.770493 | 1.770252 | 8 Ru | 2.338245 | 2.169065 | 3.496517 | 3.509365 | 2.306143 | 9 B | 2.878520 | 3.119457 | 1.757138 | 1.815051 | 2.829090 | 10 B | 2.979723 | 3.284841 | 1.747307 | 1.835990 | 1.783792 | 11 Ru | 3.064900 | 2.115772 | 2.078661 | 3.119447 | 3.267443 |  | 6 | 7 | 8 | 9 | 10 | 6 B  | 0.000000 |  |  |  |  | 7 B | 1.796557 | 0.000000 |  |  |  | 8 Ru | 3.253746 | 3.441954 | 0.000000 |  |  | 9 B | 1.749122 | 1.793285 | 3.806012 | 0.000000 |  | 10 B | 3.284075 | 2.837452 | 2.150844 | 2.727999 | 0.000000 | 11 Ru | 2.322499 | 3.269447 | 2.586721 | 2.321090 | 2.367197 |
|-------------------------------------------------------------------------------------------------------------------|-----------------------------------------------------------------------------------------------------------------------------------------------------------------------------------------------------------------------------------------------------------------------------------------------------------------------------------------------------------------------------------------------------------------------------------------------------------------------------------------------------------------------------------------------------------------------------------------------------------------------------------------------------------------------------------------------------------------------------------------------------------------------------------------------------------------------------------------------------------------------------------------------------------------------------------------------------------------------------------------------------------------------------------------------------------------------------------------------------------------------------------------------------------------------------------------------------------------------------------------------------------------------------------------------------------------------------------------------------------------------------------------------------------------------------------------------------------------------------------------------------------------------------------------------------------------------------------------------------------------------------------------------------------------------------------------------------------------------------------------------------------------------------------------------------------------------------------------------------------------------------------------------------------------------------------------------------------|----------|----------|----------|----------|---|---|-----|----------|--|--|--|--|-----|----------|----------|--|--|--|------|----------|----------|----------|--|--|-----|----------|----------|----------|----------|--|-----|----------|----------|----------|----------|----------|------|----------|----------|----------|----------|----------|-----|----------|----------|----------|----------|----------|------|----------|----------|----------|----------|----------|-----|----------|----------|----------|----------|----------|------|----------|----------|----------|----------|----------|-------|----------|----------|----------|----------|----------|--|---|---|---|---|----|------|----------|--|--|--|--|-----|----------|----------|--|--|--|------|----------|----------|----------|--|--|-----|----------|----------|----------|----------|--|------|----------|----------|----------|----------|----------|-------|----------|----------|----------|----------|----------|
|                                                                                                                   | 1                                                                                                                                                                                                                                                                                                                                                                                                                                                                                                                                                                                                                                                                                                                                                                                                                                                                                                                                                                                                                                                                                                                                                                                                                                                                                                                                                                                                                                                                                                                                                                                                                                                                                                                                                                                                                                                                                                                                                         | 2        | 3        | 4        | 5        |   |   |     |          |  |  |  |  |     |          |          |  |  |  |      |          |          |          |  |  |     |          |          |          |          |  |     |          |          |          |          |          |      |          |          |          |          |          |     |          |          |          |          |          |      |          |          |          |          |          |     |          |          |          |          |          |      |          |          |          |          |          |       |          |          |          |          |          |  |   |   |   |   |    |      |          |  |  |  |  |     |          |          |  |  |  |      |          |          |          |  |  |     |          |          |          |          |  |      |          |          |          |          |          |       |          |          |          |          |          |
| 1 B                                                                                                               | 0.000000                                                                                                                                                                                                                                                                                                                                                                                                                                                                                                                                                                                                                                                                                                                                                                                                                                                                                                                                                                                                                                                                                                                                                                                                                                                                                                                                                                                                                                                                                                                                                                                                                                                                                                                                                                                                                                                                                                                                                  |          |          |          |          |   |   |     |          |  |  |  |  |     |          |          |  |  |  |      |          |          |          |  |  |     |          |          |          |          |  |     |          |          |          |          |          |      |          |          |          |          |          |     |          |          |          |          |          |      |          |          |          |          |          |     |          |          |          |          |          |      |          |          |          |          |          |       |          |          |          |          |          |  |   |   |   |   |    |      |          |  |  |  |  |     |          |          |  |  |  |      |          |          |          |  |  |     |          |          |          |          |  |      |          |          |          |          |          |       |          |          |          |          |          |
| 2 B                                                                                                               | 1.792879                                                                                                                                                                                                                                                                                                                                                                                                                                                                                                                                                                                                                                                                                                                                                                                                                                                                                                                                                                                                                                                                                                                                                                                                                                                                                                                                                                                                                                                                                                                                                                                                                                                                                                                                                                                                                                                                                                                                                  | 0.000000 |          |          |          |   |   |     |          |  |  |  |  |     |          |          |  |  |  |      |          |          |          |  |  |     |          |          |          |          |  |     |          |          |          |          |          |      |          |          |          |          |          |     |          |          |          |          |          |      |          |          |          |          |          |     |          |          |          |          |          |      |          |          |          |          |          |       |          |          |          |          |          |  |   |   |   |   |    |      |          |  |  |  |  |     |          |          |  |  |  |      |          |          |          |  |  |     |          |          |          |          |  |      |          |          |          |          |          |       |          |          |          |          |          |
| 3 B                                                                                                               | 3.673029                                                                                                                                                                                                                                                                                                                                                                                                                                                                                                                                                                                                                                                                                                                                                                                                                                                                                                                                                                                                                                                                                                                                                                                                                                                                                                                                                                                                                                                                                                                                                                                                                                                                                                                                                                                                                                                                                                                                                  | 3.697371 | 0.000000 |          |          |   |   |     |          |  |  |  |  |     |          |          |  |  |  |      |          |          |          |  |  |     |          |          |          |          |  |     |          |          |          |          |          |      |          |          |          |          |          |     |          |          |          |          |          |      |          |          |          |          |          |     |          |          |          |          |          |      |          |          |          |          |          |       |          |          |          |          |          |  |   |   |   |   |    |      |          |  |  |  |  |     |          |          |  |  |  |      |          |          |          |  |  |     |          |          |          |          |  |      |          |          |          |          |          |       |          |          |          |          |          |
| 4 B                                                                                                               | 2.979997                                                                                                                                                                                                                                                                                                                                                                                                                                                                                                                                                                                                                                                                                                                                                                                                                                                                                                                                                                                                                                                                                                                                                                                                                                                                                                                                                                                                                                                                                                                                                                                                                                                                                                                                                                                                                                                                                                                                                  | 3.838559 | 1.726641 | 0.000000 |          |   |   |     |          |  |  |  |  |     |          |          |  |  |  |      |          |          |          |  |  |     |          |          |          |          |  |     |          |          |          |          |          |      |          |          |          |          |          |     |          |          |          |          |          |      |          |          |          |          |          |     |          |          |          |          |          |      |          |          |          |          |          |       |          |          |          |          |          |  |   |   |   |   |    |      |          |  |  |  |  |     |          |          |  |  |  |      |          |          |          |  |  |     |          |          |          |          |  |      |          |          |          |          |          |       |          |          |          |          |          |
| 5 B                                                                                                               | 1.836357                                                                                                                                                                                                                                                                                                                                                                                                                                                                                                                                                                                                                                                                                                                                                                                                                                                                                                                                                                                                                                                                                                                                                                                                                                                                                                                                                                                                                                                                                                                                                                                                                                                                                                                                                                                                                                                                                                                                                  | 3.088636 | 2.902350 | 1.793167 | 0.000000 |   |   |     |          |  |  |  |  |     |          |          |  |  |  |      |          |          |          |  |  |     |          |          |          |          |  |     |          |          |          |          |          |      |          |          |          |          |          |     |          |          |          |          |          |      |          |          |          |          |          |     |          |          |          |          |          |      |          |          |          |          |          |       |          |          |          |          |          |  |   |   |   |   |    |      |          |  |  |  |  |     |          |          |  |  |  |      |          |          |          |  |  |     |          |          |          |          |  |      |          |          |          |          |          |       |          |          |          |          |          |
| 6 B                                                                                                               | 1.772412                                                                                                                                                                                                                                                                                                                                                                                                                                                                                                                                                                                                                                                                                                                                                                                                                                                                                                                                                                                                                                                                                                                                                                                                                                                                                                                                                                                                                                                                                                                                                                                                                                                                                                                                                                                                                                                                                                                                                  | 1.768003 | 3.067473 | 2.928075 | 2.852176 |   |   |     |          |  |  |  |  |     |          |          |  |  |  |      |          |          |          |  |  |     |          |          |          |          |  |     |          |          |          |          |          |      |          |          |          |          |          |     |          |          |          |          |          |      |          |          |          |          |          |     |          |          |          |          |          |      |          |          |          |          |          |       |          |          |          |          |          |  |   |   |   |   |    |      |          |  |  |  |  |     |          |          |  |  |  |      |          |          |          |  |  |     |          |          |          |          |  |      |          |          |          |          |          |       |          |          |          |          |          |
| 7 B                                                                                                               | 1.751732                                                                                                                                                                                                                                                                                                                                                                                                                                                                                                                                                                                                                                                                                                                                                                                                                                                                                                                                                                                                                                                                                                                                                                                                                                                                                                                                                                                                                                                                                                                                                                                                                                                                                                                                                                                                                                                                                                                                                  | 3.005162 | 2.912726 | 1.770493 | 1.770252 |   |   |     |          |  |  |  |  |     |          |          |  |  |  |      |          |          |          |  |  |     |          |          |          |          |  |     |          |          |          |          |          |      |          |          |          |          |          |     |          |          |          |          |          |      |          |          |          |          |          |     |          |          |          |          |          |      |          |          |          |          |          |       |          |          |          |          |          |  |   |   |   |   |    |      |          |  |  |  |  |     |          |          |  |  |  |      |          |          |          |  |  |     |          |          |          |          |  |      |          |          |          |          |          |       |          |          |          |          |          |
| 8 Ru                                                                                                              | 2.338245                                                                                                                                                                                                                                                                                                                                                                                                                                                                                                                                                                                                                                                                                                                                                                                                                                                                                                                                                                                                                                                                                                                                                                                                                                                                                                                                                                                                                                                                                                                                                                                                                                                                                                                                                                                                                                                                                                                                                  | 2.169065 | 3.496517 | 3.509365 | 2.306143 |   |   |     |          |  |  |  |  |     |          |          |  |  |  |      |          |          |          |  |  |     |          |          |          |          |  |     |          |          |          |          |          |      |          |          |          |          |          |     |          |          |          |          |          |      |          |          |          |          |          |     |          |          |          |          |          |      |          |          |          |          |          |       |          |          |          |          |          |  |   |   |   |   |    |      |          |  |  |  |  |     |          |          |  |  |  |      |          |          |          |  |  |     |          |          |          |          |  |      |          |          |          |          |          |       |          |          |          |          |          |
| 9 B                                                                                                               | 2.878520                                                                                                                                                                                                                                                                                                                                                                                                                                                                                                                                                                                                                                                                                                                                                                                                                                                                                                                                                                                                                                                                                                                                                                                                                                                                                                                                                                                                                                                                                                                                                                                                                                                                                                                                                                                                                                                                                                                                                  | 3.119457 | 1.757138 | 1.815051 | 2.829090 |   |   |     |          |  |  |  |  |     |          |          |  |  |  |      |          |          |          |  |  |     |          |          |          |          |  |     |          |          |          |          |          |      |          |          |          |          |          |     |          |          |          |          |          |      |          |          |          |          |          |     |          |          |          |          |          |      |          |          |          |          |          |       |          |          |          |          |          |  |   |   |   |   |    |      |          |  |  |  |  |     |          |          |  |  |  |      |          |          |          |  |  |     |          |          |          |          |  |      |          |          |          |          |          |       |          |          |          |          |          |
| 10 B                                                                                                              | 2.979723                                                                                                                                                                                                                                                                                                                                                                                                                                                                                                                                                                                                                                                                                                                                                                                                                                                                                                                                                                                                                                                                                                                                                                                                                                                                                                                                                                                                                                                                                                                                                                                                                                                                                                                                                                                                                                                                                                                                                  | 3.284841 | 1.747307 | 1.835990 | 1.783792 |   |   |     |          |  |  |  |  |     |          |          |  |  |  |      |          |          |          |  |  |     |          |          |          |          |  |     |          |          |          |          |          |      |          |          |          |          |          |     |          |          |          |          |          |      |          |          |          |          |          |     |          |          |          |          |          |      |          |          |          |          |          |       |          |          |          |          |          |  |   |   |   |   |    |      |          |  |  |  |  |     |          |          |  |  |  |      |          |          |          |  |  |     |          |          |          |          |  |      |          |          |          |          |          |       |          |          |          |          |          |
| 11 Ru                                                                                                             | 3.064900                                                                                                                                                                                                                                                                                                                                                                                                                                                                                                                                                                                                                                                                                                                                                                                                                                                                                                                                                                                                                                                                                                                                                                                                                                                                                                                                                                                                                                                                                                                                                                                                                                                                                                                                                                                                                                                                                                                                                  | 2.115772 | 2.078661 | 3.119447 | 3.267443 |   |   |     |          |  |  |  |  |     |          |          |  |  |  |      |          |          |          |  |  |     |          |          |          |          |  |     |          |          |          |          |          |      |          |          |          |          |          |     |          |          |          |          |          |      |          |          |          |          |          |     |          |          |          |          |          |      |          |          |          |          |          |       |          |          |          |          |          |  |   |   |   |   |    |      |          |  |  |  |  |     |          |          |  |  |  |      |          |          |          |  |  |     |          |          |          |          |  |      |          |          |          |          |          |       |          |          |          |          |          |
|                                                                                                                   | 6                                                                                                                                                                                                                                                                                                                                                                                                                                                                                                                                                                                                                                                                                                                                                                                                                                                                                                                                                                                                                                                                                                                                                                                                                                                                                                                                                                                                                                                                                                                                                                                                                                                                                                                                                                                                                                                                                                                                                         | 7        | 8        | 9        | 10       |   |   |     |          |  |  |  |  |     |          |          |  |  |  |      |          |          |          |  |  |     |          |          |          |          |  |     |          |          |          |          |          |      |          |          |          |          |          |     |          |          |          |          |          |      |          |          |          |          |          |     |          |          |          |          |          |      |          |          |          |          |          |       |          |          |          |          |          |  |   |   |   |   |    |      |          |  |  |  |  |     |          |          |  |  |  |      |          |          |          |  |  |     |          |          |          |          |  |      |          |          |          |          |          |       |          |          |          |          |          |
| 6 B                                                                                                               | 0.000000                                                                                                                                                                                                                                                                                                                                                                                                                                                                                                                                                                                                                                                                                                                                                                                                                                                                                                                                                                                                                                                                                                                                                                                                                                                                                                                                                                                                                                                                                                                                                                                                                                                                                                                                                                                                                                                                                                                                                  |          |          |          |          |   |   |     |          |  |  |  |  |     |          |          |  |  |  |      |          |          |          |  |  |     |          |          |          |          |  |     |          |          |          |          |          |      |          |          |          |          |          |     |          |          |          |          |          |      |          |          |          |          |          |     |          |          |          |          |          |      |          |          |          |          |          |       |          |          |          |          |          |  |   |   |   |   |    |      |          |  |  |  |  |     |          |          |  |  |  |      |          |          |          |  |  |     |          |          |          |          |  |      |          |          |          |          |          |       |          |          |          |          |          |
| 7 B                                                                                                               | 1.796557                                                                                                                                                                                                                                                                                                                                                                                                                                                                                                                                                                                                                                                                                                                                                                                                                                                                                                                                                                                                                                                                                                                                                                                                                                                                                                                                                                                                                                                                                                                                                                                                                                                                                                                                                                                                                                                                                                                                                  | 0.000000 |          |          |          |   |   |     |          |  |  |  |  |     |          |          |  |  |  |      |          |          |          |  |  |     |          |          |          |          |  |     |          |          |          |          |          |      |          |          |          |          |          |     |          |          |          |          |          |      |          |          |          |          |          |     |          |          |          |          |          |      |          |          |          |          |          |       |          |          |          |          |          |  |   |   |   |   |    |      |          |  |  |  |  |     |          |          |  |  |  |      |          |          |          |  |  |     |          |          |          |          |  |      |          |          |          |          |          |       |          |          |          |          |          |
| 8 Ru                                                                                                              | 3.253746                                                                                                                                                                                                                                                                                                                                                                                                                                                                                                                                                                                                                                                                                                                                                                                                                                                                                                                                                                                                                                                                                                                                                                                                                                                                                                                                                                                                                                                                                                                                                                                                                                                                                                                                                                                                                                                                                                                                                  | 3.441954 | 0.000000 |          |          |   |   |     |          |  |  |  |  |     |          |          |  |  |  |      |          |          |          |  |  |     |          |          |          |          |  |     |          |          |          |          |          |      |          |          |          |          |          |     |          |          |          |          |          |      |          |          |          |          |          |     |          |          |          |          |          |      |          |          |          |          |          |       |          |          |          |          |          |  |   |   |   |   |    |      |          |  |  |  |  |     |          |          |  |  |  |      |          |          |          |  |  |     |          |          |          |          |  |      |          |          |          |          |          |       |          |          |          |          |          |
| 9 B                                                                                                               | 1.749122                                                                                                                                                                                                                                                                                                                                                                                                                                                                                                                                                                                                                                                                                                                                                                                                                                                                                                                                                                                                                                                                                                                                                                                                                                                                                                                                                                                                                                                                                                                                                                                                                                                                                                                                                                                                                                                                                                                                                  | 1.793285 | 3.806012 | 0.000000 |          |   |   |     |          |  |  |  |  |     |          |          |  |  |  |      |          |          |          |  |  |     |          |          |          |          |  |     |          |          |          |          |          |      |          |          |          |          |          |     |          |          |          |          |          |      |          |          |          |          |          |     |          |          |          |          |          |      |          |          |          |          |          |       |          |          |          |          |          |  |   |   |   |   |    |      |          |  |  |  |  |     |          |          |  |  |  |      |          |          |          |  |  |     |          |          |          |          |  |      |          |          |          |          |          |       |          |          |          |          |          |
| 10 B                                                                                                              | 3.284075                                                                                                                                                                                                                                                                                                                                                                                                                                                                                                                                                                                                                                                                                                                                                                                                                                                                                                                                                                                                                                                                                                                                                                                                                                                                                                                                                                                                                                                                                                                                                                                                                                                                                                                                                                                                                                                                                                                                                  | 2.837452 | 2.150844 | 2.727999 | 0.000000 |   |   |     |          |  |  |  |  |     |          |          |  |  |  |      |          |          |          |  |  |     |          |          |          |          |  |     |          |          |          |          |          |      |          |          |          |          |          |     |          |          |          |          |          |      |          |          |          |          |          |     |          |          |          |          |          |      |          |          |          |          |          |       |          |          |          |          |          |  |   |   |   |   |    |      |          |  |  |  |  |     |          |          |  |  |  |      |          |          |          |  |  |     |          |          |          |          |  |      |          |          |          |          |          |       |          |          |          |          |          |
| 11 Ru                                                                                                             | 2.322499                                                                                                                                                                                                                                                                                                                                                                                                                                                                                                                                                                                                                                                                                                                                                                                                                                                                                                                                                                                                                                                                                                                                                                                                                                                                                                                                                                                                                                                                                                                                                                                                                                                                                                                                                                                                                                                                                                                                                  | 3.269447 | 2.586721 | 2.321090 | 2.367197 |   |   |     |          |  |  |  |  |     |          |          |  |  |  |      |          |          |          |  |  |     |          |          |          |          |  |     |          |          |          |          |          |      |          |          |          |          |          |     |          |          |          |          |          |      |          |          |          |          |          |     |          |          |          |          |          |      |          |          |          |          |          |       |          |          |          |          |          |  |   |   |   |   |    |      |          |  |  |  |  |     |          |          |  |  |  |      |          |          |          |  |  |     |          |          |          |          |  |      |          |          |          |          |          |       |          |          |          |          |          |
|  <p>14. -806.13796876 +30.0</p> | <table border="1"> <thead> <tr> <th></th> <th>1</th> <th>2</th> <th>3</th> <th>4</th> <th>5</th> </tr> </thead> <tbody> <tr><td>1 B</td><td>0.000000</td><td></td><td></td><td></td><td></td></tr> <tr><td>2 B</td><td>2.004669</td><td>0.000000</td><td></td><td></td><td></td></tr> <tr><td>3 Ru</td><td>3.179172</td><td>2.204177</td><td>0.000000</td><td></td><td></td></tr> <tr><td>4 B</td><td>1.856951</td><td>2.739739</td><td>2.388496</td><td>0.000000</td><td></td></tr> <tr><td>5 B</td><td>1.764205</td><td>2.727212</td><td>3.408994</td><td>1.872944</td><td>0.000000</td></tr> <tr><td>6 Ru</td><td>3.121341</td><td>2.260708</td><td>2.816982</td><td>3.125033</td><td>2.290773</td></tr> <tr><td>7 B</td><td>3.937971</td><td>3.330883</td><td>2.208001</td><td>2.835673</td><td>3.046380</td></tr> <tr><td>8 B</td><td>3.101850</td><td>3.436576</td><td>2.981383</td><td>1.971760</td><td>1.755423</td></tr> <tr><td>9 B</td><td>3.513747</td><td>3.586078</td><td>2.102462</td><td>1.804261</td><td>2.970612</td></tr> <tr><td>10 B</td><td>1.724704</td><td>1.803564</td><td>2.037571</td><td>1.857467</td><td>2.944329</td></tr> <tr><td>11 B</td><td>1.729826</td><td>1.789228</td><td>3.524220</td><td>2.924589</td><td>1.739440</td></tr> <tr> <td></td> <td>6</td> <td>7</td> <td>8</td> <td>9</td> <td>10</td> </tr> <tr><td>6 Ru</td><td>0.000000</td><td></td><td></td><td></td><td></td></tr> <tr><td>7 B</td><td>2.080530</td><td>0.000000</td><td></td><td></td><td></td></tr> <tr><td>8 B</td><td>2.307908</td><td>1.734870</td><td>0.000000</td><td></td><td></td></tr> <tr><td>9 B</td><td>3.225975</td><td>1.740384</td><td>1.739439</td><td>0.000000</td><td></td></tr> <tr><td>10 B</td><td>3.484558</td><td>3.678489</td><td>3.483433</td><td>3.030211</td><td>0.000000</td></tr> <tr><td>11 B</td><td>2.054757</td><td>3.704247</td><td>3.116036</td><td>4.056499</td><td>2.883366</td></tr> </tbody> </table>  |          | 1        | 2        | 3        | 4 | 5 | 1 B | 0.000000 |  |  |  |  | 2 B | 2.004669 | 0.000000 |  |  |  | 3 Ru | 3.179172 | 2.204177 | 0.000000 |  |  | 4 B | 1.856951 | 2.739739 | 2.388496 | 0.000000 |  | 5 B | 1.764205 | 2.727212 | 3.408994 | 1.872944 | 0.000000 | 6 Ru | 3.121341 | 2.260708 | 2.816982 | 3.125033 | 2.290773 | 7 B | 3.937971 | 3.330883 | 2.208001 | 2.835673 | 3.046380 | 8 B  | 3.101850 | 3.436576 | 2.981383 | 1.971760 | 1.755423 | 9 B | 3.513747 | 3.586078 | 2.102462 | 1.804261 | 2.970612 | 10 B | 1.724704 | 1.803564 | 2.037571 | 1.857467 | 2.944329 | 11 B  | 1.729826 | 1.789228 | 3.524220 | 2.924589 | 1.739440 |  | 6 | 7 | 8 | 9 | 10 | 6 Ru | 0.000000 |  |  |  |  | 7 B | 2.080530 | 0.000000 |  |  |  | 8 B  | 2.307908 | 1.734870 | 0.000000 |  |  | 9 B | 3.225975 | 1.740384 | 1.739439 | 0.000000 |  | 10 B | 3.484558 | 3.678489 | 3.483433 | 3.030211 | 0.000000 | 11 B  | 2.054757 | 3.704247 | 3.116036 | 4.056499 | 2.883366 |
|                                                                                                                   | 1                                                                                                                                                                                                                                                                                                                                                                                                                                                                                                                                                                                                                                                                                                                                                                                                                                                                                                                                                                                                                                                                                                                                                                                                                                                                                                                                                                                                                                                                                                                                                                                                                                                                                                                                                                                                                                                                                                                                                         | 2        | 3        | 4        | 5        |   |   |     |          |  |  |  |  |     |          |          |  |  |  |      |          |          |          |  |  |     |          |          |          |          |  |     |          |          |          |          |          |      |          |          |          |          |          |     |          |          |          |          |          |      |          |          |          |          |          |     |          |          |          |          |          |      |          |          |          |          |          |       |          |          |          |          |          |  |   |   |   |   |    |      |          |  |  |  |  |     |          |          |  |  |  |      |          |          |          |  |  |     |          |          |          |          |  |      |          |          |          |          |          |       |          |          |          |          |          |
| 1 B                                                                                                               | 0.000000                                                                                                                                                                                                                                                                                                                                                                                                                                                                                                                                                                                                                                                                                                                                                                                                                                                                                                                                                                                                                                                                                                                                                                                                                                                                                                                                                                                                                                                                                                                                                                                                                                                                                                                                                                                                                                                                                                                                                  |          |          |          |          |   |   |     |          |  |  |  |  |     |          |          |  |  |  |      |          |          |          |  |  |     |          |          |          |          |  |     |          |          |          |          |          |      |          |          |          |          |          |     |          |          |          |          |          |      |          |          |          |          |          |     |          |          |          |          |          |      |          |          |          |          |          |       |          |          |          |          |          |  |   |   |   |   |    |      |          |  |  |  |  |     |          |          |  |  |  |      |          |          |          |  |  |     |          |          |          |          |  |      |          |          |          |          |          |       |          |          |          |          |          |
| 2 B                                                                                                               | 2.004669                                                                                                                                                                                                                                                                                                                                                                                                                                                                                                                                                                                                                                                                                                                                                                                                                                                                                                                                                                                                                                                                                                                                                                                                                                                                                                                                                                                                                                                                                                                                                                                                                                                                                                                                                                                                                                                                                                                                                  | 0.000000 |          |          |          |   |   |     |          |  |  |  |  |     |          |          |  |  |  |      |          |          |          |  |  |     |          |          |          |          |  |     |          |          |          |          |          |      |          |          |          |          |          |     |          |          |          |          |          |      |          |          |          |          |          |     |          |          |          |          |          |      |          |          |          |          |          |       |          |          |          |          |          |  |   |   |   |   |    |      |          |  |  |  |  |     |          |          |  |  |  |      |          |          |          |  |  |     |          |          |          |          |  |      |          |          |          |          |          |       |          |          |          |          |          |
| 3 Ru                                                                                                              | 3.179172                                                                                                                                                                                                                                                                                                                                                                                                                                                                                                                                                                                                                                                                                                                                                                                                                                                                                                                                                                                                                                                                                                                                                                                                                                                                                                                                                                                                                                                                                                                                                                                                                                                                                                                                                                                                                                                                                                                                                  | 2.204177 | 0.000000 |          |          |   |   |     |          |  |  |  |  |     |          |          |  |  |  |      |          |          |          |  |  |     |          |          |          |          |  |     |          |          |          |          |          |      |          |          |          |          |          |     |          |          |          |          |          |      |          |          |          |          |          |     |          |          |          |          |          |      |          |          |          |          |          |       |          |          |          |          |          |  |   |   |   |   |    |      |          |  |  |  |  |     |          |          |  |  |  |      |          |          |          |  |  |     |          |          |          |          |  |      |          |          |          |          |          |       |          |          |          |          |          |
| 4 B                                                                                                               | 1.856951                                                                                                                                                                                                                                                                                                                                                                                                                                                                                                                                                                                                                                                                                                                                                                                                                                                                                                                                                                                                                                                                                                                                                                                                                                                                                                                                                                                                                                                                                                                                                                                                                                                                                                                                                                                                                                                                                                                                                  | 2.739739 | 2.388496 | 0.000000 |          |   |   |     |          |  |  |  |  |     |          |          |  |  |  |      |          |          |          |  |  |     |          |          |          |          |  |     |          |          |          |          |          |      |          |          |          |          |          |     |          |          |          |          |          |      |          |          |          |          |          |     |          |          |          |          |          |      |          |          |          |          |          |       |          |          |          |          |          |  |   |   |   |   |    |      |          |  |  |  |  |     |          |          |  |  |  |      |          |          |          |  |  |     |          |          |          |          |  |      |          |          |          |          |          |       |          |          |          |          |          |
| 5 B                                                                                                               | 1.764205                                                                                                                                                                                                                                                                                                                                                                                                                                                                                                                                                                                                                                                                                                                                                                                                                                                                                                                                                                                                                                                                                                                                                                                                                                                                                                                                                                                                                                                                                                                                                                                                                                                                                                                                                                                                                                                                                                                                                  | 2.727212 | 3.408994 | 1.872944 | 0.000000 |   |   |     |          |  |  |  |  |     |          |          |  |  |  |      |          |          |          |  |  |     |          |          |          |          |  |     |          |          |          |          |          |      |          |          |          |          |          |     |          |          |          |          |          |      |          |          |          |          |          |     |          |          |          |          |          |      |          |          |          |          |          |       |          |          |          |          |          |  |   |   |   |   |    |      |          |  |  |  |  |     |          |          |  |  |  |      |          |          |          |  |  |     |          |          |          |          |  |      |          |          |          |          |          |       |          |          |          |          |          |
| 6 Ru                                                                                                              | 3.121341                                                                                                                                                                                                                                                                                                                                                                                                                                                                                                                                                                                                                                                                                                                                                                                                                                                                                                                                                                                                                                                                                                                                                                                                                                                                                                                                                                                                                                                                                                                                                                                                                                                                                                                                                                                                                                                                                                                                                  | 2.260708 | 2.816982 | 3.125033 | 2.290773 |   |   |     |          |  |  |  |  |     |          |          |  |  |  |      |          |          |          |  |  |     |          |          |          |          |  |     |          |          |          |          |          |      |          |          |          |          |          |     |          |          |          |          |          |      |          |          |          |          |          |     |          |          |          |          |          |      |          |          |          |          |          |       |          |          |          |          |          |  |   |   |   |   |    |      |          |  |  |  |  |     |          |          |  |  |  |      |          |          |          |  |  |     |          |          |          |          |  |      |          |          |          |          |          |       |          |          |          |          |          |
| 7 B                                                                                                               | 3.937971                                                                                                                                                                                                                                                                                                                                                                                                                                                                                                                                                                                                                                                                                                                                                                                                                                                                                                                                                                                                                                                                                                                                                                                                                                                                                                                                                                                                                                                                                                                                                                                                                                                                                                                                                                                                                                                                                                                                                  | 3.330883 | 2.208001 | 2.835673 | 3.046380 |   |   |     |          |  |  |  |  |     |          |          |  |  |  |      |          |          |          |  |  |     |          |          |          |          |  |     |          |          |          |          |          |      |          |          |          |          |          |     |          |          |          |          |          |      |          |          |          |          |          |     |          |          |          |          |          |      |          |          |          |          |          |       |          |          |          |          |          |  |   |   |   |   |    |      |          |  |  |  |  |     |          |          |  |  |  |      |          |          |          |  |  |     |          |          |          |          |  |      |          |          |          |          |          |       |          |          |          |          |          |
| 8 B                                                                                                               | 3.101850                                                                                                                                                                                                                                                                                                                                                                                                                                                                                                                                                                                                                                                                                                                                                                                                                                                                                                                                                                                                                                                                                                                                                                                                                                                                                                                                                                                                                                                                                                                                                                                                                                                                                                                                                                                                                                                                                                                                                  | 3.436576 | 2.981383 | 1.971760 | 1.755423 |   |   |     |          |  |  |  |  |     |          |          |  |  |  |      |          |          |          |  |  |     |          |          |          |          |  |     |          |          |          |          |          |      |          |          |          |          |          |     |          |          |          |          |          |      |          |          |          |          |          |     |          |          |          |          |          |      |          |          |          |          |          |       |          |          |          |          |          |  |   |   |   |   |    |      |          |  |  |  |  |     |          |          |  |  |  |      |          |          |          |  |  |     |          |          |          |          |  |      |          |          |          |          |          |       |          |          |          |          |          |
| 9 B                                                                                                               | 3.513747                                                                                                                                                                                                                                                                                                                                                                                                                                                                                                                                                                                                                                                                                                                                                                                                                                                                                                                                                                                                                                                                                                                                                                                                                                                                                                                                                                                                                                                                                                                                                                                                                                                                                                                                                                                                                                                                                                                                                  | 3.586078 | 2.102462 | 1.804261 | 2.970612 |   |   |     |          |  |  |  |  |     |          |          |  |  |  |      |          |          |          |  |  |     |          |          |          |          |  |     |          |          |          |          |          |      |          |          |          |          |          |     |          |          |          |          |          |      |          |          |          |          |          |     |          |          |          |          |          |      |          |          |          |          |          |       |          |          |          |          |          |  |   |   |   |   |    |      |          |  |  |  |  |     |          |          |  |  |  |      |          |          |          |  |  |     |          |          |          |          |  |      |          |          |          |          |          |       |          |          |          |          |          |
| 10 B                                                                                                              | 1.724704                                                                                                                                                                                                                                                                                                                                                                                                                                                                                                                                                                                                                                                                                                                                                                                                                                                                                                                                                                                                                                                                                                                                                                                                                                                                                                                                                                                                                                                                                                                                                                                                                                                                                                                                                                                                                                                                                                                                                  | 1.803564 | 2.037571 | 1.857467 | 2.944329 |   |   |     |          |  |  |  |  |     |          |          |  |  |  |      |          |          |          |  |  |     |          |          |          |          |  |     |          |          |          |          |          |      |          |          |          |          |          |     |          |          |          |          |          |      |          |          |          |          |          |     |          |          |          |          |          |      |          |          |          |          |          |       |          |          |          |          |          |  |   |   |   |   |    |      |          |  |  |  |  |     |          |          |  |  |  |      |          |          |          |  |  |     |          |          |          |          |  |      |          |          |          |          |          |       |          |          |          |          |          |
| 11 B                                                                                                              | 1.729826                                                                                                                                                                                                                                                                                                                                                                                                                                                                                                                                                                                                                                                                                                                                                                                                                                                                                                                                                                                                                                                                                                                                                                                                                                                                                                                                                                                                                                                                                                                                                                                                                                                                                                                                                                                                                                                                                                                                                  | 1.789228 | 3.524220 | 2.924589 | 1.739440 |   |   |     |          |  |  |  |  |     |          |          |  |  |  |      |          |          |          |  |  |     |          |          |          |          |  |     |          |          |          |          |          |      |          |          |          |          |          |     |          |          |          |          |          |      |          |          |          |          |          |     |          |          |          |          |          |      |          |          |          |          |          |       |          |          |          |          |          |  |   |   |   |   |    |      |          |  |  |  |  |     |          |          |  |  |  |      |          |          |          |  |  |     |          |          |          |          |  |      |          |          |          |          |          |       |          |          |          |          |          |
|                                                                                                                   | 6                                                                                                                                                                                                                                                                                                                                                                                                                                                                                                                                                                                                                                                                                                                                                                                                                                                                                                                                                                                                                                                                                                                                                                                                                                                                                                                                                                                                                                                                                                                                                                                                                                                                                                                                                                                                                                                                                                                                                         | 7        | 8        | 9        | 10       |   |   |     |          |  |  |  |  |     |          |          |  |  |  |      |          |          |          |  |  |     |          |          |          |          |  |     |          |          |          |          |          |      |          |          |          |          |          |     |          |          |          |          |          |      |          |          |          |          |          |     |          |          |          |          |          |      |          |          |          |          |          |       |          |          |          |          |          |  |   |   |   |   |    |      |          |  |  |  |  |     |          |          |  |  |  |      |          |          |          |  |  |     |          |          |          |          |  |      |          |          |          |          |          |       |          |          |          |          |          |
| 6 Ru                                                                                                              | 0.000000                                                                                                                                                                                                                                                                                                                                                                                                                                                                                                                                                                                                                                                                                                                                                                                                                                                                                                                                                                                                                                                                                                                                                                                                                                                                                                                                                                                                                                                                                                                                                                                                                                                                                                                                                                                                                                                                                                                                                  |          |          |          |          |   |   |     |          |  |  |  |  |     |          |          |  |  |  |      |          |          |          |  |  |     |          |          |          |          |  |     |          |          |          |          |          |      |          |          |          |          |          |     |          |          |          |          |          |      |          |          |          |          |          |     |          |          |          |          |          |      |          |          |          |          |          |       |          |          |          |          |          |  |   |   |   |   |    |      |          |  |  |  |  |     |          |          |  |  |  |      |          |          |          |  |  |     |          |          |          |          |  |      |          |          |          |          |          |       |          |          |          |          |          |
| 7 B                                                                                                               | 2.080530                                                                                                                                                                                                                                                                                                                                                                                                                                                                                                                                                                                                                                                                                                                                                                                                                                                                                                                                                                                                                                                                                                                                                                                                                                                                                                                                                                                                                                                                                                                                                                                                                                                                                                                                                                                                                                                                                                                                                  | 0.000000 |          |          |          |   |   |     |          |  |  |  |  |     |          |          |  |  |  |      |          |          |          |  |  |     |          |          |          |          |  |     |          |          |          |          |          |      |          |          |          |          |          |     |          |          |          |          |          |      |          |          |          |          |          |     |          |          |          |          |          |      |          |          |          |          |          |       |          |          |          |          |          |  |   |   |   |   |    |      |          |  |  |  |  |     |          |          |  |  |  |      |          |          |          |  |  |     |          |          |          |          |  |      |          |          |          |          |          |       |          |          |          |          |          |
| 8 B                                                                                                               | 2.307908                                                                                                                                                                                                                                                                                                                                                                                                                                                                                                                                                                                                                                                                                                                                                                                                                                                                                                                                                                                                                                                                                                                                                                                                                                                                                                                                                                                                                                                                                                                                                                                                                                                                                                                                                                                                                                                                                                                                                  | 1.734870 | 0.000000 |          |          |   |   |     |          |  |  |  |  |     |          |          |  |  |  |      |          |          |          |  |  |     |          |          |          |          |  |     |          |          |          |          |          |      |          |          |          |          |          |     |          |          |          |          |          |      |          |          |          |          |          |     |          |          |          |          |          |      |          |          |          |          |          |       |          |          |          |          |          |  |   |   |   |   |    |      |          |  |  |  |  |     |          |          |  |  |  |      |          |          |          |  |  |     |          |          |          |          |  |      |          |          |          |          |          |       |          |          |          |          |          |
| 9 B                                                                                                               | 3.225975                                                                                                                                                                                                                                                                                                                                                                                                                                                                                                                                                                                                                                                                                                                                                                                                                                                                                                                                                                                                                                                                                                                                                                                                                                                                                                                                                                                                                                                                                                                                                                                                                                                                                                                                                                                                                                                                                                                                                  | 1.740384 | 1.739439 | 0.000000 |          |   |   |     |          |  |  |  |  |     |          |          |  |  |  |      |          |          |          |  |  |     |          |          |          |          |  |     |          |          |          |          |          |      |          |          |          |          |          |     |          |          |          |          |          |      |          |          |          |          |          |     |          |          |          |          |          |      |          |          |          |          |          |       |          |          |          |          |          |  |   |   |   |   |    |      |          |  |  |  |  |     |          |          |  |  |  |      |          |          |          |  |  |     |          |          |          |          |  |      |          |          |          |          |          |       |          |          |          |          |          |
| 10 B                                                                                                              | 3.484558                                                                                                                                                                                                                                                                                                                                                                                                                                                                                                                                                                                                                                                                                                                                                                                                                                                                                                                                                                                                                                                                                                                                                                                                                                                                                                                                                                                                                                                                                                                                                                                                                                                                                                                                                                                                                                                                                                                                                  | 3.678489 | 3.483433 | 3.030211 | 0.000000 |   |   |     |          |  |  |  |  |     |          |          |  |  |  |      |          |          |          |  |  |     |          |          |          |          |  |     |          |          |          |          |          |      |          |          |          |          |          |     |          |          |          |          |          |      |          |          |          |          |          |     |          |          |          |          |          |      |          |          |          |          |          |       |          |          |          |          |          |  |   |   |   |   |    |      |          |  |  |  |  |     |          |          |  |  |  |      |          |          |          |  |  |     |          |          |          |          |  |      |          |          |          |          |          |       |          |          |          |          |          |
| 11 B                                                                                                              | 2.054757                                                                                                                                                                                                                                                                                                                                                                                                                                                                                                                                                                                                                                                                                                                                                                                                                                                                                                                                                                                                                                                                                                                                                                                                                                                                                                                                                                                                                                                                                                                                                                                                                                                                                                                                                                                                                                                                                                                                                  | 3.704247 | 3.116036 | 4.056499 | 2.883366 |   |   |     |          |  |  |  |  |     |          |          |  |  |  |      |          |          |          |  |  |     |          |          |          |          |  |     |          |          |          |          |          |      |          |          |          |          |          |     |          |          |          |          |          |      |          |          |          |          |          |     |          |          |          |          |          |      |          |          |          |          |          |       |          |          |          |          |          |  |   |   |   |   |    |      |          |  |  |  |  |     |          |          |  |  |  |      |          |          |          |  |  |     |          |          |          |          |  |      |          |          |          |          |          |       |          |          |          |          |          |

Table 4C. Energy ranking of the  $Cp_2Ru_2B_9H_9$  structures

| No | Initial structure            | Final energy (a.u.) | $\Delta E$<br>kcal/mole |
|----|------------------------------|---------------------|-------------------------|
| 1  | 11-Ru-2-TricapCubeA-e        | -806.18577798       | 0.00                    |
| 2  | 11-Ru-4-Icos-1vx-l_r-10-53   | -806.17167862       | 8.85                    |
| 3  | 11-Ru-1-PentaCapTrPr-f       | -806.17167861       | 8.85                    |
| 4  | 11-Ru-4-Icos-1vx-l_r-47-225  | -806.17167861       | 8.85                    |
| 5  | 11-Ru-4-Icos-1vx-l_r-47-33   | -806.17146474       | 8.98                    |
| 6  | 11-Ru-4-Icos-1vx-l_r-47 i    | -806.17015438       | 9.80                    |
| 7  | 11-Ru-4-Icos-1vx-o           | -806.16658996       | 12.04                   |
| 8  | 11-Ru-1-PentaCapTrPr-c       | -806.16592762       | 12.46                   |
| 9  | 11-Ru-3-OhfusetopentBipyr-o  | -806.16244262       | 14.64                   |
| 10 | 11-Ru-1-PentaCapTrPr-d       | -806.15957922       | 16.44                   |
| 11 | 11-Ru-2-TricapCubeA-q        | -806.15957361       | 16.44                   |
| 12 | 11-Ru-2-TricapCubeA-k        | -806.15957360       | 16.44                   |
| 13 | 11-Ru-2-TricapCubeB-g        | -806.15957359       | 16.44                   |
| 14 | 11-Ru-2-TricapCubeB-j        | -806.15798640       | 17.44                   |
| 15 | 11-Ru-4-Icos-1vx-d           | -806.15743681       | 17.78                   |
| 16 | 11-Ru-2-TricapCubeA-c        | -806.15614275       | 18.60                   |
| 17 | 11-Ru-1-PentaCapTrPr-k       | -806.15588141       | 18.76                   |
| 18 | 11-Ru-2-TricapCubeA-j        | -806.15193641       | 21.24                   |
| 19 | 11-Ru-1-PentaCapTrPr-j       | -806.15074442       | 21.98                   |
| 20 | 11-Ru-2-TricapCubeB-b        | -806.15074442       | 21.98                   |
| 21 | 11-Ru-2-TricapCubeB-o        | -806.15074442       | 21.98                   |
| 22 | 11-Ru-1-PentaCapTrPr-b       | -806.14911142       | 23.01                   |
| 23 | 11-Ru-2-TricapCubeB-p        | -806.14813148       | 23.62                   |
| 24 | 11-Ru-1-PentaCapTrPr-e       | -806.14736585       | 24.10                   |
| 25 | 11-Ru-4-Icos-1vx-l_r-10 i-53 | -806.14631573       | 24.76                   |
| 26 | 11-Ru-4-Icos-1vx-l imag      | -806.14566785       | 25.17                   |
| 27 | 11-Ru-4-Icos-1vx-c           | -806.14064632       | 28.32                   |
| 28 | 11-Ru-2-TricapCubeA-r        | -806.14064631       | 28.32                   |
| 29 | 11-Ru-2-TricapCubeA-m        | -806.13796876       | 30.00                   |
| 30 | 11-Ru-4-Icos-1vx-i           | -806.13632364       | 31.03                   |
| 31 | 11-Ru-2-TricapCubeB-n        | -806.13632363       | 31.03                   |
| 32 | 11-Ru-2-TricapCubeA-n        | -806.13210259       | 33.68                   |
| 33 | 11-Ru-1-PentaCapTrPr-g_r-9   | -806.13019532       | 34.88                   |
| 34 | 11-Ru-1-PentaCapTrPr-g       | -806.13019251       | 34.88                   |
| 35 | 11-Ru-2-TricapCubeB-h        | -806.12882833       | 35.74                   |
| 36 | 11-Ru-4-Icos-1vx-h_r-152-334 | -806.12881419       | 35.74                   |
| 37 | 11-Ru-4-Icos-1vx-p           | -806.12881419       | 35.74                   |
| 38 | 11-Ru-Ig-3                   | -806.12694362       | 36.92                   |
| 39 | 11-Ru-2-TricapCubeA-a        | -806.12396186       | 38.79                   |
| 40 | 11-Ru-2-TricapCubeA-p        | -806.12396186       | 38.79                   |
| 41 | 11-Ru-2-TricapCubeB-i        | -806.12396186       | 38.79                   |



|    |                                    |               |       |
|----|------------------------------------|---------------|-------|
| 42 | 11-Ru-4-Icos-1vx-k                 | -806.12396186 | 38.79 |
| 43 | 11-Ru-4-Icos-1vx-r                 | -806.12396186 | 38.79 |
| 44 | 11-Ru-2-TricapCubeA-g              | -806.12169168 | 40.21 |
| 45 | 11-Ru-4-Icos-1vx-a_r-59            | -806.12111654 | 40.58 |
| 46 | 11-Ru-2-TricapCubeA-d              | -806.12111651 | 40.58 |
| 47 | 11-Ru-2-TricapCubeB-e              | -806.12111650 | 40.58 |
| 48 | 11-Ru-2-TricapCubeB-k              | -806.12111649 | 40.58 |
| 49 | 11-Ru-4-Icos-1vx-b                 | -806.11938853 | 41.66 |
| 50 | 11-Ru-2-TricapCubeA-i              | -806.11840841 | 42.27 |
| 51 | 11-Ru-4-Icos-1vx-a i-59            | -806.11748571 | 42.85 |
| 52 | 11-Ru-2-TricapCubeB-m              | -806.11695789 | 43.18 |
| 53 | 11-Ru-3-OhfusettoPentBipyr-h       | -806.11496331 | 44.44 |
| 54 | 11-Ru-2-TricapCubeB-l              | -806.11254322 | 45.95 |
| 55 | 11-Ru-1-PentaCapTrPr-i             | -806.11205559 | 46.26 |
| 56 | 11-Ru-3-OhfusettoPentBipyr-j       | -806.11038951 | 47.31 |
| 57 | 11-Ru-4-Icos-1vx-h_r-76            | -806.11025619 | 47.39 |
| 58 | 11-Ru-3-OhfusettoPentBipyr-e       | -806.10981804 | 47.66 |
| 59 | 11-Ru-4-Icos-1vx-f                 | -806.10610709 | 49.99 |
| 60 | 11-Ru-2-TricapCubeB-c              | -806.10522783 | 50.55 |
| 61 | 11-Ru-3-OhfusettoPentBipyr-w       | -806.10483905 | 50.79 |
| 62 | 11-Ru-3-OhfusettoPentBipyr-f_r-211 | -806.10169955 | 52.76 |
| 63 | 11-Ru-3-OhfusettoPentBipyr-i       | -806.10124237 | 53.05 |
| 64 | 11-Ru-3-OhfusettoPentBipyr-c       | -806.09905074 | 54.42 |
| 65 | 11-Ru-2-TricapCubeB-f              | -806.09734474 | 55.49 |
| 66 | 11-Ru-2-TricapCubeA-f              | -806.09637365 | 56.10 |
| 67 | 11-Ru-4-Icos-1vx-s                 | -806.09631470 | 56.14 |
| 68 | 11-Ru-2-TricapCubeA-l              | -806.09599142 | 56.34 |
| 69 | 11-Ru-2-TricapCubeB-a              | -806.09500243 | 56.96 |
| 70 | 11-Ru-3-OhfusettoPentBipyr-l       | -806.09438947 | 57.35 |
| 71 | 11-Ru-3-OhfusettoPentBipyr-lf      | -806.09438947 | 57.35 |
| 72 | 11-Ru-2-TricapCubeA-h              | -806.09411876 | 57.52 |
| 73 | 11-Ru-4-Icos-1vx-g                 | -806.09221183 | 58.71 |
| 74 | 11-Ru-3-OhfusettoPentBipyr-m       | -806.08781702 | 61.47 |
| 75 | 11-Ru-3-OhfusettoPentBipyr-g       | -806.08743202 | 61.71 |
| 76 | 11-Ru-4-Icos-1vx-q_r-35            | -806.08500130 | 63.24 |
| 77 | 11-Ru-4-Icos-1vx-q_r-42            | -806.08487297 | 63.32 |
| 78 | 11-Ru-4-Icos-1vx-q i-35-42         | -806.08486515 | 63.32 |
| 79 | 11-Ru-4-Icos-1vx-m                 | -806.08475709 | 63.39 |
| 80 | 11-Ru-4-Icos-1vx-e                 | -806.08355833 | 64.14 |
| 81 | 11-Ru-3-OhfusettoPentBipyr-s       | -806.08261883 | 64.73 |
| 82 | 11-Ru-4-Icos-1vx-n                 | -806.08245813 | 64.83 |
| 83 | 11-Ru-2-TricapCubeB-df             | -806.08242324 | 64.86 |
| 84 | 11-Ru-2-TricapCubeB-d              | -806.08223737 | 64.97 |
| 85 | 11-Ru-4-Icos-1vx-j                 | -806.08029591 | 66.19 |
| 86 | 11-Ru-4-Icos-1vx-h_r-195           | -806.07611091 | 68.82 |

|     |                                         |               |        |
|-----|-----------------------------------------|---------------|--------|
| 87  | 11-Ru-4-Icos-1vx-h_r-26                 | -806.07611091 | 68.82  |
| 88  | 11-Ru-3-OhfusettoPentBipyr-v            | -806.07286410 | 70.85  |
| 89  | 11-Ru-4-Icos-1vx-t                      | -806.06952713 | 72.95  |
| 90  | 11-Ru-3-OhfusettoPentBipyr-a            | -806.06816446 | 73.80  |
| 91  | 11-Ru-3-OhfusettoPentBipyr-x_r-76       | -806.05947564 | 79.25  |
| 92  | 11-Ru-4-Icos-1vx-h_r-15                 | -806.05870958 | 79.74  |
| 93  | 11-Ru-4-Icos-1vx-h_r-152 i-334          | -806.05870958 | 79.74  |
| 94  | 11-Ru-1-PentaCapTrPr-a                  | -806.05657987 | 81.07  |
| 95  | 11-Ru-3-OhfusettoPentBipyr-n            | -806.05372195 | 82.87  |
| 96  | 11-Ru-3-OhfusettoPentBipyr-k_r-77       | -806.04993874 | 85.24  |
| 97  | 11-Ru-3-OhfusettoPentBipyr-k_r-78_r-368 | -806.04993874 | 85.24  |
| 98  | 11-Ru-3-OhfusettoPentBipyr-k_r-388      | -806.04993872 | 85.24  |
| 99  | 11-Ru-3-OhfusettoPentBipyr-b            | -806.04681601 | 87.20  |
| 100 | 11-Ru-3-OhfusettoPentBipyr-d            | -806.03792843 | 92.78  |
| 101 | 11-Ru-3-OhfusettoPentBipyr-k_r-78 i-368 | -806.03628766 | 93.81  |
| 102 | 11-Ru-3-OhfusettoPentBipyr-f i-211      | -806.03079439 | 97.25  |
| 103 | 11-Ru-3-OhfusettoPentBipyr-x            | -806.02845915 | 98.72  |
| 104 | 11-Ru-3-OhfusettoPentBipyr-r            | -806.02670835 | 99.82  |
| 105 | 11-Ru-3-OhfusettoPentBipyr-k imag       | -806.02497022 | 100.91 |
| 106 | 11-Ru-3-OhfusettoPentBipyr-u            | -806.01240318 | 108.79 |
| 107 | 11-Ru-3-OhfusettoPentBipyr-p            | -806.00875599 | 111.08 |
| 108 | 11-Ru-3-OhfusettoPentBipyr-t            | -806.00402102 | 114.05 |
| 109 | 11-Ru-3-OhfusettoPentBipyr-q            | -806.00340763 | 114.44 |
| 110 | 11-Ru-4-Icos-1vx-h imag                 | -806.00110243 | 115.88 |

## The 12-vertex $\text{Cp}_2\text{Ru}_2\text{B}_{10}\text{H}_{10}$ System

Table S5A. Initial structures

Table S5B. Lowest energy structure distances

Table S5C Global ranking of all structures

Table S5A. Initial  $\text{Cp}_2\text{Ru}_2\text{B}_{10}\text{H}_{10}$  structures (one example from each family) 22 structures in total

| <b>Initial structures</b>                                                                                                       |
|---------------------------------------------------------------------------------------------------------------------------------|
| 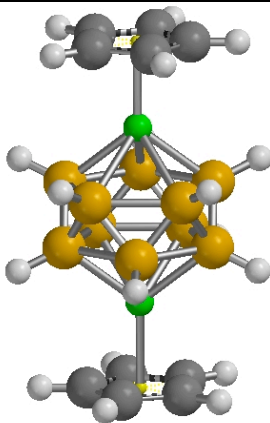 <p>1. Icosahedron 3 structures</p>            |
|  <p>2. Cubeoctahedron 9 structures</p>        |
|  <p>3. Anticubeoctahedron 10 structures</p> |

Table S5B. Distances table for the lowest energy Cp<sub>2</sub>Ru<sub>2</sub>B<sub>10</sub>H<sub>10</sub> structures

| 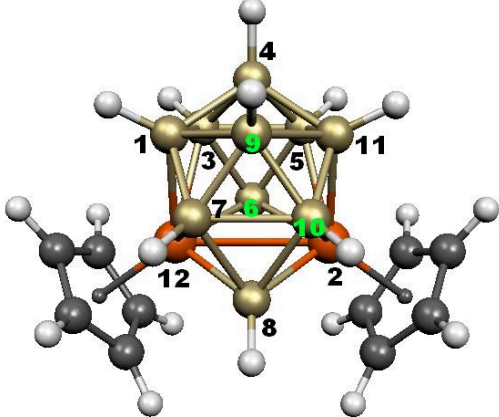 <p><b>1. -831.64407734 0.0 kcal/mole C<sub>2v</sub></b></p> | <table border="1"> <thead> <tr> <th></th> <th>1</th> <th>2</th> <th>3</th> <th>4</th> <th>5</th> </tr> </thead> <tbody> <tr><td>1 B</td><td>0.000000</td><td></td><td></td><td></td><td></td></tr> <tr><td>2 Ru</td><td>3.645993</td><td>0.000000</td><td></td><td></td><td></td></tr> <tr><td>3 B</td><td>1.743253</td><td>3.214187</td><td>0.000000</td><td></td><td></td></tr> <tr><td>4 B</td><td>1.792353</td><td>3.330371</td><td>1.758933</td><td>0.000000</td><td></td></tr> <tr><td>5 B</td><td>2.912984</td><td>2.226514</td><td>1.888800</td><td>1.758933</td><td>0.000000</td></tr> <tr><td>6 B</td><td>3.120228</td><td>2.098316</td><td>1.857324</td><td>3.007100</td><td>1.857324</td></tr> <tr><td>7 B</td><td>1.749812</td><td>3.224543</td><td>3.031668</td><td>2.925792</td><td>3.601930</td></tr> <tr><td>8 B</td><td>3.230406</td><td>2.055600</td><td>3.606285</td><td>3.891948</td><td>3.606285</td></tr> <tr><td>9 B</td><td>1.826906</td><td>3.303362</td><td>2.945269</td><td>1.829595</td><td>2.945269</td></tr> <tr><td>10 B</td><td>2.972729</td><td>2.167882</td><td>3.601930</td><td>2.925792</td><td>3.031668</td></tr> <tr><td>11 B</td><td>2.883600</td><td>2.255975</td><td>2.912984</td><td>1.792353</td><td>1.743253</td></tr> <tr><td>12 Ru</td><td>2.255975</td><td>2.845000</td><td>2.226514</td><td>3.330371</td><td>3.214187</td></tr> <tr> <td></td> <td>6</td> <td>7</td> <td>8</td> <td>9</td> <td>10</td> </tr> <tr><td>6 B</td><td>0.000000</td><td></td><td></td><td></td><td></td></tr> <tr><td>7 B</td><td>3.562972</td><td>0.000000</td><td></td><td></td><td></td></tr> <tr><td>8 B</td><td>3.013239</td><td>2.000236</td><td>0.000000</td><td></td><td></td></tr> <tr><td>9 B</td><td>3.807411</td><td>1.746708</td><td>3.095030</td><td>0.000000</td><td></td></tr> <tr><td>10 B</td><td>3.562972</td><td>2.002800</td><td>2.000236</td><td>1.746708</td><td>0.000000</td></tr> <tr><td>11 B</td><td>3.120228</td><td>2.972729</td><td>3.230406</td><td>1.826906</td><td>1.749812</td></tr> <tr><td>12 Ru</td><td>2.098316</td><td>2.167882</td><td>2.055600</td><td>3.303362</td><td>3.224543</td></tr> <tr> <td></td> <td>11</td> <td>12</td> <td></td> <td></td> <td></td> </tr> <tr><td>11 B</td><td>0.000000</td><td></td><td></td><td></td><td></td></tr> <tr><td>12 Ru</td><td>3.645993</td><td>0.000000</td><td></td><td></td><td></td></tr> </tbody> </table> |          | 1        | 2        | 3        | 4 | 5 | 1 B  | 0.000000 |  |  |  |  | 2 Ru | 3.645993 | 0.000000 |  |  |  | 3 B | 1.743253 | 3.214187 | 0.000000 |  |  | 4 B | 1.792353 | 3.330371 | 1.758933 | 0.000000 |  | 5 B | 2.912984 | 2.226514 | 1.888800 | 1.758933 | 0.000000 | 6 B | 3.120228 | 2.098316 | 1.857324 | 3.007100 | 1.857324 | 7 B | 1.749812 | 3.224543 | 3.031668 | 2.925792 | 3.601930 | 8 B | 3.230406 | 2.055600 | 3.606285 | 3.891948 | 3.606285 | 9 B  | 1.826906 | 3.303362 | 2.945269 | 1.829595 | 2.945269 | 10 B | 2.972729 | 2.167882 | 3.601930 | 2.925792 | 3.031668 | 11 B | 2.883600 | 2.255975 | 2.912984 | 1.792353 | 1.743253 | 12 Ru | 2.255975 | 2.845000 | 2.226514 | 3.330371 | 3.214187 |  | 6 | 7 | 8 | 9 | 10 | 6 B | 0.000000 |  |  |  |  | 7 B | 3.562972 | 0.000000 |  |  |  | 8 B | 3.013239 | 2.000236 | 0.000000 |  |  | 9 B  | 3.807411 | 1.746708 | 3.095030 | 0.000000 |  | 10 B | 3.562972 | 2.002800 | 2.000236 | 1.746708 | 0.000000 | 11 B | 3.120228 | 2.972729 | 3.230406 | 1.826906 | 1.749812 | 12 Ru | 2.098316 | 2.167882 | 2.055600 | 3.303362 | 3.224543 |  | 11 | 12 |  |  |  | 11 B | 0.000000 |  |  |  |  | 12 Ru | 3.645993 | 0.000000 |  |  |  |
|-----------------------------------------------------------------------------------------------------------------------------------------------|------------------------------------------------------------------------------------------------------------------------------------------------------------------------------------------------------------------------------------------------------------------------------------------------------------------------------------------------------------------------------------------------------------------------------------------------------------------------------------------------------------------------------------------------------------------------------------------------------------------------------------------------------------------------------------------------------------------------------------------------------------------------------------------------------------------------------------------------------------------------------------------------------------------------------------------------------------------------------------------------------------------------------------------------------------------------------------------------------------------------------------------------------------------------------------------------------------------------------------------------------------------------------------------------------------------------------------------------------------------------------------------------------------------------------------------------------------------------------------------------------------------------------------------------------------------------------------------------------------------------------------------------------------------------------------------------------------------------------------------------------------------------------------------------------------------------------------------------------------------------------------------------------------------------------------------------------------------------------------------------------------------------------------------------------------------------------------------------------------------------------------------------------------------------------------------------------------------------------------------------------------------------------------------------------------------------------------------------------------------------------------------------------------------------------|----------|----------|----------|----------|---|---|------|----------|--|--|--|--|------|----------|----------|--|--|--|-----|----------|----------|----------|--|--|-----|----------|----------|----------|----------|--|-----|----------|----------|----------|----------|----------|-----|----------|----------|----------|----------|----------|-----|----------|----------|----------|----------|----------|-----|----------|----------|----------|----------|----------|------|----------|----------|----------|----------|----------|------|----------|----------|----------|----------|----------|------|----------|----------|----------|----------|----------|-------|----------|----------|----------|----------|----------|--|---|---|---|---|----|-----|----------|--|--|--|--|-----|----------|----------|--|--|--|-----|----------|----------|----------|--|--|------|----------|----------|----------|----------|--|------|----------|----------|----------|----------|----------|------|----------|----------|----------|----------|----------|-------|----------|----------|----------|----------|----------|--|----|----|--|--|--|------|----------|--|--|--|--|-------|----------|----------|--|--|--|
|                                                                                                                                               | 1                                                                                                                                                                                                                                                                                                                                                                                                                                                                                                                                                                                                                                                                                                                                                                                                                                                                                                                                                                                                                                                                                                                                                                                                                                                                                                                                                                                                                                                                                                                                                                                                                                                                                                                                                                                                                                                                                                                                                                                                                                                                                                                                                                                                                                                                                                                                                                                                                            | 2        | 3        | 4        | 5        |   |   |      |          |  |  |  |  |      |          |          |  |  |  |     |          |          |          |  |  |     |          |          |          |          |  |     |          |          |          |          |          |     |          |          |          |          |          |     |          |          |          |          |          |     |          |          |          |          |          |      |          |          |          |          |          |      |          |          |          |          |          |      |          |          |          |          |          |       |          |          |          |          |          |  |   |   |   |   |    |     |          |  |  |  |  |     |          |          |  |  |  |     |          |          |          |  |  |      |          |          |          |          |  |      |          |          |          |          |          |      |          |          |          |          |          |       |          |          |          |          |          |  |    |    |  |  |  |      |          |  |  |  |  |       |          |          |  |  |  |
| 1 B                                                                                                                                           | 0.000000                                                                                                                                                                                                                                                                                                                                                                                                                                                                                                                                                                                                                                                                                                                                                                                                                                                                                                                                                                                                                                                                                                                                                                                                                                                                                                                                                                                                                                                                                                                                                                                                                                                                                                                                                                                                                                                                                                                                                                                                                                                                                                                                                                                                                                                                                                                                                                                                                     |          |          |          |          |   |   |      |          |  |  |  |  |      |          |          |  |  |  |     |          |          |          |  |  |     |          |          |          |          |  |     |          |          |          |          |          |     |          |          |          |          |          |     |          |          |          |          |          |     |          |          |          |          |          |      |          |          |          |          |          |      |          |          |          |          |          |      |          |          |          |          |          |       |          |          |          |          |          |  |   |   |   |   |    |     |          |  |  |  |  |     |          |          |  |  |  |     |          |          |          |  |  |      |          |          |          |          |  |      |          |          |          |          |          |      |          |          |          |          |          |       |          |          |          |          |          |  |    |    |  |  |  |      |          |  |  |  |  |       |          |          |  |  |  |
| 2 Ru                                                                                                                                          | 3.645993                                                                                                                                                                                                                                                                                                                                                                                                                                                                                                                                                                                                                                                                                                                                                                                                                                                                                                                                                                                                                                                                                                                                                                                                                                                                                                                                                                                                                                                                                                                                                                                                                                                                                                                                                                                                                                                                                                                                                                                                                                                                                                                                                                                                                                                                                                                                                                                                                     | 0.000000 |          |          |          |   |   |      |          |  |  |  |  |      |          |          |  |  |  |     |          |          |          |  |  |     |          |          |          |          |  |     |          |          |          |          |          |     |          |          |          |          |          |     |          |          |          |          |          |     |          |          |          |          |          |      |          |          |          |          |          |      |          |          |          |          |          |      |          |          |          |          |          |       |          |          |          |          |          |  |   |   |   |   |    |     |          |  |  |  |  |     |          |          |  |  |  |     |          |          |          |  |  |      |          |          |          |          |  |      |          |          |          |          |          |      |          |          |          |          |          |       |          |          |          |          |          |  |    |    |  |  |  |      |          |  |  |  |  |       |          |          |  |  |  |
| 3 B                                                                                                                                           | 1.743253                                                                                                                                                                                                                                                                                                                                                                                                                                                                                                                                                                                                                                                                                                                                                                                                                                                                                                                                                                                                                                                                                                                                                                                                                                                                                                                                                                                                                                                                                                                                                                                                                                                                                                                                                                                                                                                                                                                                                                                                                                                                                                                                                                                                                                                                                                                                                                                                                     | 3.214187 | 0.000000 |          |          |   |   |      |          |  |  |  |  |      |          |          |  |  |  |     |          |          |          |  |  |     |          |          |          |          |  |     |          |          |          |          |          |     |          |          |          |          |          |     |          |          |          |          |          |     |          |          |          |          |          |      |          |          |          |          |          |      |          |          |          |          |          |      |          |          |          |          |          |       |          |          |          |          |          |  |   |   |   |   |    |     |          |  |  |  |  |     |          |          |  |  |  |     |          |          |          |  |  |      |          |          |          |          |  |      |          |          |          |          |          |      |          |          |          |          |          |       |          |          |          |          |          |  |    |    |  |  |  |      |          |  |  |  |  |       |          |          |  |  |  |
| 4 B                                                                                                                                           | 1.792353                                                                                                                                                                                                                                                                                                                                                                                                                                                                                                                                                                                                                                                                                                                                                                                                                                                                                                                                                                                                                                                                                                                                                                                                                                                                                                                                                                                                                                                                                                                                                                                                                                                                                                                                                                                                                                                                                                                                                                                                                                                                                                                                                                                                                                                                                                                                                                                                                     | 3.330371 | 1.758933 | 0.000000 |          |   |   |      |          |  |  |  |  |      |          |          |  |  |  |     |          |          |          |  |  |     |          |          |          |          |  |     |          |          |          |          |          |     |          |          |          |          |          |     |          |          |          |          |          |     |          |          |          |          |          |      |          |          |          |          |          |      |          |          |          |          |          |      |          |          |          |          |          |       |          |          |          |          |          |  |   |   |   |   |    |     |          |  |  |  |  |     |          |          |  |  |  |     |          |          |          |  |  |      |          |          |          |          |  |      |          |          |          |          |          |      |          |          |          |          |          |       |          |          |          |          |          |  |    |    |  |  |  |      |          |  |  |  |  |       |          |          |  |  |  |
| 5 B                                                                                                                                           | 2.912984                                                                                                                                                                                                                                                                                                                                                                                                                                                                                                                                                                                                                                                                                                                                                                                                                                                                                                                                                                                                                                                                                                                                                                                                                                                                                                                                                                                                                                                                                                                                                                                                                                                                                                                                                                                                                                                                                                                                                                                                                                                                                                                                                                                                                                                                                                                                                                                                                     | 2.226514 | 1.888800 | 1.758933 | 0.000000 |   |   |      |          |  |  |  |  |      |          |          |  |  |  |     |          |          |          |  |  |     |          |          |          |          |  |     |          |          |          |          |          |     |          |          |          |          |          |     |          |          |          |          |          |     |          |          |          |          |          |      |          |          |          |          |          |      |          |          |          |          |          |      |          |          |          |          |          |       |          |          |          |          |          |  |   |   |   |   |    |     |          |  |  |  |  |     |          |          |  |  |  |     |          |          |          |  |  |      |          |          |          |          |  |      |          |          |          |          |          |      |          |          |          |          |          |       |          |          |          |          |          |  |    |    |  |  |  |      |          |  |  |  |  |       |          |          |  |  |  |
| 6 B                                                                                                                                           | 3.120228                                                                                                                                                                                                                                                                                                                                                                                                                                                                                                                                                                                                                                                                                                                                                                                                                                                                                                                                                                                                                                                                                                                                                                                                                                                                                                                                                                                                                                                                                                                                                                                                                                                                                                                                                                                                                                                                                                                                                                                                                                                                                                                                                                                                                                                                                                                                                                                                                     | 2.098316 | 1.857324 | 3.007100 | 1.857324 |   |   |      |          |  |  |  |  |      |          |          |  |  |  |     |          |          |          |  |  |     |          |          |          |          |  |     |          |          |          |          |          |     |          |          |          |          |          |     |          |          |          |          |          |     |          |          |          |          |          |      |          |          |          |          |          |      |          |          |          |          |          |      |          |          |          |          |          |       |          |          |          |          |          |  |   |   |   |   |    |     |          |  |  |  |  |     |          |          |  |  |  |     |          |          |          |  |  |      |          |          |          |          |  |      |          |          |          |          |          |      |          |          |          |          |          |       |          |          |          |          |          |  |    |    |  |  |  |      |          |  |  |  |  |       |          |          |  |  |  |
| 7 B                                                                                                                                           | 1.749812                                                                                                                                                                                                                                                                                                                                                                                                                                                                                                                                                                                                                                                                                                                                                                                                                                                                                                                                                                                                                                                                                                                                                                                                                                                                                                                                                                                                                                                                                                                                                                                                                                                                                                                                                                                                                                                                                                                                                                                                                                                                                                                                                                                                                                                                                                                                                                                                                     | 3.224543 | 3.031668 | 2.925792 | 3.601930 |   |   |      |          |  |  |  |  |      |          |          |  |  |  |     |          |          |          |  |  |     |          |          |          |          |  |     |          |          |          |          |          |     |          |          |          |          |          |     |          |          |          |          |          |     |          |          |          |          |          |      |          |          |          |          |          |      |          |          |          |          |          |      |          |          |          |          |          |       |          |          |          |          |          |  |   |   |   |   |    |     |          |  |  |  |  |     |          |          |  |  |  |     |          |          |          |  |  |      |          |          |          |          |  |      |          |          |          |          |          |      |          |          |          |          |          |       |          |          |          |          |          |  |    |    |  |  |  |      |          |  |  |  |  |       |          |          |  |  |  |
| 8 B                                                                                                                                           | 3.230406                                                                                                                                                                                                                                                                                                                                                                                                                                                                                                                                                                                                                                                                                                                                                                                                                                                                                                                                                                                                                                                                                                                                                                                                                                                                                                                                                                                                                                                                                                                                                                                                                                                                                                                                                                                                                                                                                                                                                                                                                                                                                                                                                                                                                                                                                                                                                                                                                     | 2.055600 | 3.606285 | 3.891948 | 3.606285 |   |   |      |          |  |  |  |  |      |          |          |  |  |  |     |          |          |          |  |  |     |          |          |          |          |  |     |          |          |          |          |          |     |          |          |          |          |          |     |          |          |          |          |          |     |          |          |          |          |          |      |          |          |          |          |          |      |          |          |          |          |          |      |          |          |          |          |          |       |          |          |          |          |          |  |   |   |   |   |    |     |          |  |  |  |  |     |          |          |  |  |  |     |          |          |          |  |  |      |          |          |          |          |  |      |          |          |          |          |          |      |          |          |          |          |          |       |          |          |          |          |          |  |    |    |  |  |  |      |          |  |  |  |  |       |          |          |  |  |  |
| 9 B                                                                                                                                           | 1.826906                                                                                                                                                                                                                                                                                                                                                                                                                                                                                                                                                                                                                                                                                                                                                                                                                                                                                                                                                                                                                                                                                                                                                                                                                                                                                                                                                                                                                                                                                                                                                                                                                                                                                                                                                                                                                                                                                                                                                                                                                                                                                                                                                                                                                                                                                                                                                                                                                     | 3.303362 | 2.945269 | 1.829595 | 2.945269 |   |   |      |          |  |  |  |  |      |          |          |  |  |  |     |          |          |          |  |  |     |          |          |          |          |  |     |          |          |          |          |          |     |          |          |          |          |          |     |          |          |          |          |          |     |          |          |          |          |          |      |          |          |          |          |          |      |          |          |          |          |          |      |          |          |          |          |          |       |          |          |          |          |          |  |   |   |   |   |    |     |          |  |  |  |  |     |          |          |  |  |  |     |          |          |          |  |  |      |          |          |          |          |  |      |          |          |          |          |          |      |          |          |          |          |          |       |          |          |          |          |          |  |    |    |  |  |  |      |          |  |  |  |  |       |          |          |  |  |  |
| 10 B                                                                                                                                          | 2.972729                                                                                                                                                                                                                                                                                                                                                                                                                                                                                                                                                                                                                                                                                                                                                                                                                                                                                                                                                                                                                                                                                                                                                                                                                                                                                                                                                                                                                                                                                                                                                                                                                                                                                                                                                                                                                                                                                                                                                                                                                                                                                                                                                                                                                                                                                                                                                                                                                     | 2.167882 | 3.601930 | 2.925792 | 3.031668 |   |   |      |          |  |  |  |  |      |          |          |  |  |  |     |          |          |          |  |  |     |          |          |          |          |  |     |          |          |          |          |          |     |          |          |          |          |          |     |          |          |          |          |          |     |          |          |          |          |          |      |          |          |          |          |          |      |          |          |          |          |          |      |          |          |          |          |          |       |          |          |          |          |          |  |   |   |   |   |    |     |          |  |  |  |  |     |          |          |  |  |  |     |          |          |          |  |  |      |          |          |          |          |  |      |          |          |          |          |          |      |          |          |          |          |          |       |          |          |          |          |          |  |    |    |  |  |  |      |          |  |  |  |  |       |          |          |  |  |  |
| 11 B                                                                                                                                          | 2.883600                                                                                                                                                                                                                                                                                                                                                                                                                                                                                                                                                                                                                                                                                                                                                                                                                                                                                                                                                                                                                                                                                                                                                                                                                                                                                                                                                                                                                                                                                                                                                                                                                                                                                                                                                                                                                                                                                                                                                                                                                                                                                                                                                                                                                                                                                                                                                                                                                     | 2.255975 | 2.912984 | 1.792353 | 1.743253 |   |   |      |          |  |  |  |  |      |          |          |  |  |  |     |          |          |          |  |  |     |          |          |          |          |  |     |          |          |          |          |          |     |          |          |          |          |          |     |          |          |          |          |          |     |          |          |          |          |          |      |          |          |          |          |          |      |          |          |          |          |          |      |          |          |          |          |          |       |          |          |          |          |          |  |   |   |   |   |    |     |          |  |  |  |  |     |          |          |  |  |  |     |          |          |          |  |  |      |          |          |          |          |  |      |          |          |          |          |          |      |          |          |          |          |          |       |          |          |          |          |          |  |    |    |  |  |  |      |          |  |  |  |  |       |          |          |  |  |  |
| 12 Ru                                                                                                                                         | 2.255975                                                                                                                                                                                                                                                                                                                                                                                                                                                                                                                                                                                                                                                                                                                                                                                                                                                                                                                                                                                                                                                                                                                                                                                                                                                                                                                                                                                                                                                                                                                                                                                                                                                                                                                                                                                                                                                                                                                                                                                                                                                                                                                                                                                                                                                                                                                                                                                                                     | 2.845000 | 2.226514 | 3.330371 | 3.214187 |   |   |      |          |  |  |  |  |      |          |          |  |  |  |     |          |          |          |  |  |     |          |          |          |          |  |     |          |          |          |          |          |     |          |          |          |          |          |     |          |          |          |          |          |     |          |          |          |          |          |      |          |          |          |          |          |      |          |          |          |          |          |      |          |          |          |          |          |       |          |          |          |          |          |  |   |   |   |   |    |     |          |  |  |  |  |     |          |          |  |  |  |     |          |          |          |  |  |      |          |          |          |          |  |      |          |          |          |          |          |      |          |          |          |          |          |       |          |          |          |          |          |  |    |    |  |  |  |      |          |  |  |  |  |       |          |          |  |  |  |
|                                                                                                                                               | 6                                                                                                                                                                                                                                                                                                                                                                                                                                                                                                                                                                                                                                                                                                                                                                                                                                                                                                                                                                                                                                                                                                                                                                                                                                                                                                                                                                                                                                                                                                                                                                                                                                                                                                                                                                                                                                                                                                                                                                                                                                                                                                                                                                                                                                                                                                                                                                                                                            | 7        | 8        | 9        | 10       |   |   |      |          |  |  |  |  |      |          |          |  |  |  |     |          |          |          |  |  |     |          |          |          |          |  |     |          |          |          |          |          |     |          |          |          |          |          |     |          |          |          |          |          |     |          |          |          |          |          |      |          |          |          |          |          |      |          |          |          |          |          |      |          |          |          |          |          |       |          |          |          |          |          |  |   |   |   |   |    |     |          |  |  |  |  |     |          |          |  |  |  |     |          |          |          |  |  |      |          |          |          |          |  |      |          |          |          |          |          |      |          |          |          |          |          |       |          |          |          |          |          |  |    |    |  |  |  |      |          |  |  |  |  |       |          |          |  |  |  |
| 6 B                                                                                                                                           | 0.000000                                                                                                                                                                                                                                                                                                                                                                                                                                                                                                                                                                                                                                                                                                                                                                                                                                                                                                                                                                                                                                                                                                                                                                                                                                                                                                                                                                                                                                                                                                                                                                                                                                                                                                                                                                                                                                                                                                                                                                                                                                                                                                                                                                                                                                                                                                                                                                                                                     |          |          |          |          |   |   |      |          |  |  |  |  |      |          |          |  |  |  |     |          |          |          |  |  |     |          |          |          |          |  |     |          |          |          |          |          |     |          |          |          |          |          |     |          |          |          |          |          |     |          |          |          |          |          |      |          |          |          |          |          |      |          |          |          |          |          |      |          |          |          |          |          |       |          |          |          |          |          |  |   |   |   |   |    |     |          |  |  |  |  |     |          |          |  |  |  |     |          |          |          |  |  |      |          |          |          |          |  |      |          |          |          |          |          |      |          |          |          |          |          |       |          |          |          |          |          |  |    |    |  |  |  |      |          |  |  |  |  |       |          |          |  |  |  |
| 7 B                                                                                                                                           | 3.562972                                                                                                                                                                                                                                                                                                                                                                                                                                                                                                                                                                                                                                                                                                                                                                                                                                                                                                                                                                                                                                                                                                                                                                                                                                                                                                                                                                                                                                                                                                                                                                                                                                                                                                                                                                                                                                                                                                                                                                                                                                                                                                                                                                                                                                                                                                                                                                                                                     | 0.000000 |          |          |          |   |   |      |          |  |  |  |  |      |          |          |  |  |  |     |          |          |          |  |  |     |          |          |          |          |  |     |          |          |          |          |          |     |          |          |          |          |          |     |          |          |          |          |          |     |          |          |          |          |          |      |          |          |          |          |          |      |          |          |          |          |          |      |          |          |          |          |          |       |          |          |          |          |          |  |   |   |   |   |    |     |          |  |  |  |  |     |          |          |  |  |  |     |          |          |          |  |  |      |          |          |          |          |  |      |          |          |          |          |          |      |          |          |          |          |          |       |          |          |          |          |          |  |    |    |  |  |  |      |          |  |  |  |  |       |          |          |  |  |  |
| 8 B                                                                                                                                           | 3.013239                                                                                                                                                                                                                                                                                                                                                                                                                                                                                                                                                                                                                                                                                                                                                                                                                                                                                                                                                                                                                                                                                                                                                                                                                                                                                                                                                                                                                                                                                                                                                                                                                                                                                                                                                                                                                                                                                                                                                                                                                                                                                                                                                                                                                                                                                                                                                                                                                     | 2.000236 | 0.000000 |          |          |   |   |      |          |  |  |  |  |      |          |          |  |  |  |     |          |          |          |  |  |     |          |          |          |          |  |     |          |          |          |          |          |     |          |          |          |          |          |     |          |          |          |          |          |     |          |          |          |          |          |      |          |          |          |          |          |      |          |          |          |          |          |      |          |          |          |          |          |       |          |          |          |          |          |  |   |   |   |   |    |     |          |  |  |  |  |     |          |          |  |  |  |     |          |          |          |  |  |      |          |          |          |          |  |      |          |          |          |          |          |      |          |          |          |          |          |       |          |          |          |          |          |  |    |    |  |  |  |      |          |  |  |  |  |       |          |          |  |  |  |
| 9 B                                                                                                                                           | 3.807411                                                                                                                                                                                                                                                                                                                                                                                                                                                                                                                                                                                                                                                                                                                                                                                                                                                                                                                                                                                                                                                                                                                                                                                                                                                                                                                                                                                                                                                                                                                                                                                                                                                                                                                                                                                                                                                                                                                                                                                                                                                                                                                                                                                                                                                                                                                                                                                                                     | 1.746708 | 3.095030 | 0.000000 |          |   |   |      |          |  |  |  |  |      |          |          |  |  |  |     |          |          |          |  |  |     |          |          |          |          |  |     |          |          |          |          |          |     |          |          |          |          |          |     |          |          |          |          |          |     |          |          |          |          |          |      |          |          |          |          |          |      |          |          |          |          |          |      |          |          |          |          |          |       |          |          |          |          |          |  |   |   |   |   |    |     |          |  |  |  |  |     |          |          |  |  |  |     |          |          |          |  |  |      |          |          |          |          |  |      |          |          |          |          |          |      |          |          |          |          |          |       |          |          |          |          |          |  |    |    |  |  |  |      |          |  |  |  |  |       |          |          |  |  |  |
| 10 B                                                                                                                                          | 3.562972                                                                                                                                                                                                                                                                                                                                                                                                                                                                                                                                                                                                                                                                                                                                                                                                                                                                                                                                                                                                                                                                                                                                                                                                                                                                                                                                                                                                                                                                                                                                                                                                                                                                                                                                                                                                                                                                                                                                                                                                                                                                                                                                                                                                                                                                                                                                                                                                                     | 2.002800 | 2.000236 | 1.746708 | 0.000000 |   |   |      |          |  |  |  |  |      |          |          |  |  |  |     |          |          |          |  |  |     |          |          |          |          |  |     |          |          |          |          |          |     |          |          |          |          |          |     |          |          |          |          |          |     |          |          |          |          |          |      |          |          |          |          |          |      |          |          |          |          |          |      |          |          |          |          |          |       |          |          |          |          |          |  |   |   |   |   |    |     |          |  |  |  |  |     |          |          |  |  |  |     |          |          |          |  |  |      |          |          |          |          |  |      |          |          |          |          |          |      |          |          |          |          |          |       |          |          |          |          |          |  |    |    |  |  |  |      |          |  |  |  |  |       |          |          |  |  |  |
| 11 B                                                                                                                                          | 3.120228                                                                                                                                                                                                                                                                                                                                                                                                                                                                                                                                                                                                                                                                                                                                                                                                                                                                                                                                                                                                                                                                                                                                                                                                                                                                                                                                                                                                                                                                                                                                                                                                                                                                                                                                                                                                                                                                                                                                                                                                                                                                                                                                                                                                                                                                                                                                                                                                                     | 2.972729 | 3.230406 | 1.826906 | 1.749812 |   |   |      |          |  |  |  |  |      |          |          |  |  |  |     |          |          |          |  |  |     |          |          |          |          |  |     |          |          |          |          |          |     |          |          |          |          |          |     |          |          |          |          |          |     |          |          |          |          |          |      |          |          |          |          |          |      |          |          |          |          |          |      |          |          |          |          |          |       |          |          |          |          |          |  |   |   |   |   |    |     |          |  |  |  |  |     |          |          |  |  |  |     |          |          |          |  |  |      |          |          |          |          |  |      |          |          |          |          |          |      |          |          |          |          |          |       |          |          |          |          |          |  |    |    |  |  |  |      |          |  |  |  |  |       |          |          |  |  |  |
| 12 Ru                                                                                                                                         | 2.098316                                                                                                                                                                                                                                                                                                                                                                                                                                                                                                                                                                                                                                                                                                                                                                                                                                                                                                                                                                                                                                                                                                                                                                                                                                                                                                                                                                                                                                                                                                                                                                                                                                                                                                                                                                                                                                                                                                                                                                                                                                                                                                                                                                                                                                                                                                                                                                                                                     | 2.167882 | 2.055600 | 3.303362 | 3.224543 |   |   |      |          |  |  |  |  |      |          |          |  |  |  |     |          |          |          |  |  |     |          |          |          |          |  |     |          |          |          |          |          |     |          |          |          |          |          |     |          |          |          |          |          |     |          |          |          |          |          |      |          |          |          |          |          |      |          |          |          |          |          |      |          |          |          |          |          |       |          |          |          |          |          |  |   |   |   |   |    |     |          |  |  |  |  |     |          |          |  |  |  |     |          |          |          |  |  |      |          |          |          |          |  |      |          |          |          |          |          |      |          |          |          |          |          |       |          |          |          |          |          |  |    |    |  |  |  |      |          |  |  |  |  |       |          |          |  |  |  |
|                                                                                                                                               | 11                                                                                                                                                                                                                                                                                                                                                                                                                                                                                                                                                                                                                                                                                                                                                                                                                                                                                                                                                                                                                                                                                                                                                                                                                                                                                                                                                                                                                                                                                                                                                                                                                                                                                                                                                                                                                                                                                                                                                                                                                                                                                                                                                                                                                                                                                                                                                                                                                           | 12       |          |          |          |   |   |      |          |  |  |  |  |      |          |          |  |  |  |     |          |          |          |  |  |     |          |          |          |          |  |     |          |          |          |          |          |     |          |          |          |          |          |     |          |          |          |          |          |     |          |          |          |          |          |      |          |          |          |          |          |      |          |          |          |          |          |      |          |          |          |          |          |       |          |          |          |          |          |  |   |   |   |   |    |     |          |  |  |  |  |     |          |          |  |  |  |     |          |          |          |  |  |      |          |          |          |          |  |      |          |          |          |          |          |      |          |          |          |          |          |       |          |          |          |          |          |  |    |    |  |  |  |      |          |  |  |  |  |       |          |          |  |  |  |
| 11 B                                                                                                                                          | 0.000000                                                                                                                                                                                                                                                                                                                                                                                                                                                                                                                                                                                                                                                                                                                                                                                                                                                                                                                                                                                                                                                                                                                                                                                                                                                                                                                                                                                                                                                                                                                                                                                                                                                                                                                                                                                                                                                                                                                                                                                                                                                                                                                                                                                                                                                                                                                                                                                                                     |          |          |          |          |   |   |      |          |  |  |  |  |      |          |          |  |  |  |     |          |          |          |  |  |     |          |          |          |          |  |     |          |          |          |          |          |     |          |          |          |          |          |     |          |          |          |          |          |     |          |          |          |          |          |      |          |          |          |          |          |      |          |          |          |          |          |      |          |          |          |          |          |       |          |          |          |          |          |  |   |   |   |   |    |     |          |  |  |  |  |     |          |          |  |  |  |     |          |          |          |  |  |      |          |          |          |          |  |      |          |          |          |          |          |      |          |          |          |          |          |       |          |          |          |          |          |  |    |    |  |  |  |      |          |  |  |  |  |       |          |          |  |  |  |
| 12 Ru                                                                                                                                         | 3.645993                                                                                                                                                                                                                                                                                                                                                                                                                                                                                                                                                                                                                                                                                                                                                                                                                                                                                                                                                                                                                                                                                                                                                                                                                                                                                                                                                                                                                                                                                                                                                                                                                                                                                                                                                                                                                                                                                                                                                                                                                                                                                                                                                                                                                                                                                                                                                                                                                     | 0.000000 |          |          |          |   |   |      |          |  |  |  |  |      |          |          |  |  |  |     |          |          |          |  |  |     |          |          |          |          |  |     |          |          |          |          |          |     |          |          |          |          |          |     |          |          |          |          |          |     |          |          |          |          |          |      |          |          |          |          |          |      |          |          |          |          |          |      |          |          |          |          |          |       |          |          |          |          |          |  |   |   |   |   |    |     |          |  |  |  |  |     |          |          |  |  |  |     |          |          |          |  |  |      |          |          |          |          |  |      |          |          |          |          |          |      |          |          |          |          |          |       |          |          |          |          |          |  |    |    |  |  |  |      |          |  |  |  |  |       |          |          |  |  |  |
|  <p><b>2. -831.62282569 +13.3</b></p>                       | <table border="1"> <thead> <tr> <th></th> <th>1</th> <th>2</th> <th>3</th> <th>4</th> <th>5</th> </tr> </thead> <tbody> <tr><td>1 Ru</td><td>0.000000</td><td></td><td></td><td></td><td></td></tr> <tr><td>2 B</td><td>3.449989</td><td>0.000000</td><td></td><td></td><td></td></tr> <tr><td>3 B</td><td>2.303213</td><td>1.801313</td><td>0.000000</td><td></td><td></td></tr> <tr><td>4 B</td><td>2.263684</td><td>1.747530</td><td>1.746693</td><td>0.000000</td><td></td></tr> <tr><td>5 B</td><td>3.609586</td><td>1.795755</td><td>2.869491</td><td>2.641467</td><td>0.000000</td></tr> <tr><td>6 B</td><td>3.159351</td><td>1.761049</td><td>1.780850</td><td>2.705481</td><td>1.761400</td></tr> <tr><td>7 B</td><td>3.597410</td><td>1.779608</td><td>3.048217</td><td>1.827534</td><td>1.769108</td></tr> <tr><td>8 B</td><td>2.027968</td><td>2.963032</td><td>1.777746</td><td>2.906147</td><td>2.980913</td></tr> <tr><td>9 Ru</td><td>2.819881</td><td>3.430345</td><td>3.643151</td><td>2.031933</td><td>3.467624</td></tr> <tr><td>10 B</td><td>3.189218</td><td>2.895553</td><td>3.561103</td><td>2.629903</td><td>1.746244</td></tr> <tr><td>11 B</td><td>2.398001</td><td>2.905431</td><td>2.771318</td><td>2.847139</td><td>1.888955</td></tr> <tr><td>12 B</td><td>2.040215</td><td>3.797963</td><td>3.570359</td><td>2.839417</td><td>3.075401</td></tr> <tr> <td></td> <td>6</td> <td>7</td> <td>8</td> <td>9</td> <td>10</td> </tr> <tr><td>6 B</td><td>0.000000</td><td></td><td></td><td></td><td></td></tr> <tr><td>7 B</td><td>2.951418</td><td>0.000000</td><td></td><td></td><td></td></tr> <tr><td>8 B</td><td>1.725105</td><td>3.839325</td><td>0.000000</td><td></td><td></td></tr> <tr><td>9 Ru</td><td>4.232171</td><td>2.250173</td><td>4.198801</td><td>0.000000</td><td></td></tr> <tr><td>10 B</td><td>3.069107</td><td>1.761518</td><td>3.499188</td><td>2.294196</td><td>0.000000</td></tr> <tr><td>11 B</td><td>2.000405</td><td>2.920160</td><td>1.881600</td><td>3.383956</td><td>1.887905</td></tr> <tr><td>12 B</td><td>3.588501</td><td>3.082769</td><td>3.077200</td><td>2.220174</td><td>1.808575</td></tr> <tr> <td></td> <td>11</td> <td>12</td> <td></td> <td></td> <td></td> </tr> <tr><td>11 B</td><td>0.000000</td><td></td><td></td><td></td><td></td></tr> <tr><td>12 B</td><td>1.877417</td><td>0.000000</td><td></td><td></td><td></td></tr> </tbody> </table>  |          | 1        | 2        | 3        | 4 | 5 | 1 Ru | 0.000000 |  |  |  |  | 2 B  | 3.449989 | 0.000000 |  |  |  | 3 B | 2.303213 | 1.801313 | 0.000000 |  |  | 4 B | 2.263684 | 1.747530 | 1.746693 | 0.000000 |  | 5 B | 3.609586 | 1.795755 | 2.869491 | 2.641467 | 0.000000 | 6 B | 3.159351 | 1.761049 | 1.780850 | 2.705481 | 1.761400 | 7 B | 3.597410 | 1.779608 | 3.048217 | 1.827534 | 1.769108 | 8 B | 2.027968 | 2.963032 | 1.777746 | 2.906147 | 2.980913 | 9 Ru | 2.819881 | 3.430345 | 3.643151 | 2.031933 | 3.467624 | 10 B | 3.189218 | 2.895553 | 3.561103 | 2.629903 | 1.746244 | 11 B | 2.398001 | 2.905431 | 2.771318 | 2.847139 | 1.888955 | 12 B  | 2.040215 | 3.797963 | 3.570359 | 2.839417 | 3.075401 |  | 6 | 7 | 8 | 9 | 10 | 6 B | 0.000000 |  |  |  |  | 7 B | 2.951418 | 0.000000 |  |  |  | 8 B | 1.725105 | 3.839325 | 0.000000 |  |  | 9 Ru | 4.232171 | 2.250173 | 4.198801 | 0.000000 |  | 10 B | 3.069107 | 1.761518 | 3.499188 | 2.294196 | 0.000000 | 11 B | 2.000405 | 2.920160 | 1.881600 | 3.383956 | 1.887905 | 12 B  | 3.588501 | 3.082769 | 3.077200 | 2.220174 | 1.808575 |  | 11 | 12 |  |  |  | 11 B | 0.000000 |  |  |  |  | 12 B  | 1.877417 | 0.000000 |  |  |  |
|                                                                                                                                               | 1                                                                                                                                                                                                                                                                                                                                                                                                                                                                                                                                                                                                                                                                                                                                                                                                                                                                                                                                                                                                                                                                                                                                                                                                                                                                                                                                                                                                                                                                                                                                                                                                                                                                                                                                                                                                                                                                                                                                                                                                                                                                                                                                                                                                                                                                                                                                                                                                                            | 2        | 3        | 4        | 5        |   |   |      |          |  |  |  |  |      |          |          |  |  |  |     |          |          |          |  |  |     |          |          |          |          |  |     |          |          |          |          |          |     |          |          |          |          |          |     |          |          |          |          |          |     |          |          |          |          |          |      |          |          |          |          |          |      |          |          |          |          |          |      |          |          |          |          |          |       |          |          |          |          |          |  |   |   |   |   |    |     |          |  |  |  |  |     |          |          |  |  |  |     |          |          |          |  |  |      |          |          |          |          |  |      |          |          |          |          |          |      |          |          |          |          |          |       |          |          |          |          |          |  |    |    |  |  |  |      |          |  |  |  |  |       |          |          |  |  |  |
| 1 Ru                                                                                                                                          | 0.000000                                                                                                                                                                                                                                                                                                                                                                                                                                                                                                                                                                                                                                                                                                                                                                                                                                                                                                                                                                                                                                                                                                                                                                                                                                                                                                                                                                                                                                                                                                                                                                                                                                                                                                                                                                                                                                                                                                                                                                                                                                                                                                                                                                                                                                                                                                                                                                                                                     |          |          |          |          |   |   |      |          |  |  |  |  |      |          |          |  |  |  |     |          |          |          |  |  |     |          |          |          |          |  |     |          |          |          |          |          |     |          |          |          |          |          |     |          |          |          |          |          |     |          |          |          |          |          |      |          |          |          |          |          |      |          |          |          |          |          |      |          |          |          |          |          |       |          |          |          |          |          |  |   |   |   |   |    |     |          |  |  |  |  |     |          |          |  |  |  |     |          |          |          |  |  |      |          |          |          |          |  |      |          |          |          |          |          |      |          |          |          |          |          |       |          |          |          |          |          |  |    |    |  |  |  |      |          |  |  |  |  |       |          |          |  |  |  |
| 2 B                                                                                                                                           | 3.449989                                                                                                                                                                                                                                                                                                                                                                                                                                                                                                                                                                                                                                                                                                                                                                                                                                                                                                                                                                                                                                                                                                                                                                                                                                                                                                                                                                                                                                                                                                                                                                                                                                                                                                                                                                                                                                                                                                                                                                                                                                                                                                                                                                                                                                                                                                                                                                                                                     | 0.000000 |          |          |          |   |   |      |          |  |  |  |  |      |          |          |  |  |  |     |          |          |          |  |  |     |          |          |          |          |  |     |          |          |          |          |          |     |          |          |          |          |          |     |          |          |          |          |          |     |          |          |          |          |          |      |          |          |          |          |          |      |          |          |          |          |          |      |          |          |          |          |          |       |          |          |          |          |          |  |   |   |   |   |    |     |          |  |  |  |  |     |          |          |  |  |  |     |          |          |          |  |  |      |          |          |          |          |  |      |          |          |          |          |          |      |          |          |          |          |          |       |          |          |          |          |          |  |    |    |  |  |  |      |          |  |  |  |  |       |          |          |  |  |  |
| 3 B                                                                                                                                           | 2.303213                                                                                                                                                                                                                                                                                                                                                                                                                                                                                                                                                                                                                                                                                                                                                                                                                                                                                                                                                                                                                                                                                                                                                                                                                                                                                                                                                                                                                                                                                                                                                                                                                                                                                                                                                                                                                                                                                                                                                                                                                                                                                                                                                                                                                                                                                                                                                                                                                     | 1.801313 | 0.000000 |          |          |   |   |      |          |  |  |  |  |      |          |          |  |  |  |     |          |          |          |  |  |     |          |          |          |          |  |     |          |          |          |          |          |     |          |          |          |          |          |     |          |          |          |          |          |     |          |          |          |          |          |      |          |          |          |          |          |      |          |          |          |          |          |      |          |          |          |          |          |       |          |          |          |          |          |  |   |   |   |   |    |     |          |  |  |  |  |     |          |          |  |  |  |     |          |          |          |  |  |      |          |          |          |          |  |      |          |          |          |          |          |      |          |          |          |          |          |       |          |          |          |          |          |  |    |    |  |  |  |      |          |  |  |  |  |       |          |          |  |  |  |
| 4 B                                                                                                                                           | 2.263684                                                                                                                                                                                                                                                                                                                                                                                                                                                                                                                                                                                                                                                                                                                                                                                                                                                                                                                                                                                                                                                                                                                                                                                                                                                                                                                                                                                                                                                                                                                                                                                                                                                                                                                                                                                                                                                                                                                                                                                                                                                                                                                                                                                                                                                                                                                                                                                                                     | 1.747530 | 1.746693 | 0.000000 |          |   |   |      |          |  |  |  |  |      |          |          |  |  |  |     |          |          |          |  |  |     |          |          |          |          |  |     |          |          |          |          |          |     |          |          |          |          |          |     |          |          |          |          |          |     |          |          |          |          |          |      |          |          |          |          |          |      |          |          |          |          |          |      |          |          |          |          |          |       |          |          |          |          |          |  |   |   |   |   |    |     |          |  |  |  |  |     |          |          |  |  |  |     |          |          |          |  |  |      |          |          |          |          |  |      |          |          |          |          |          |      |          |          |          |          |          |       |          |          |          |          |          |  |    |    |  |  |  |      |          |  |  |  |  |       |          |          |  |  |  |
| 5 B                                                                                                                                           | 3.609586                                                                                                                                                                                                                                                                                                                                                                                                                                                                                                                                                                                                                                                                                                                                                                                                                                                                                                                                                                                                                                                                                                                                                                                                                                                                                                                                                                                                                                                                                                                                                                                                                                                                                                                                                                                                                                                                                                                                                                                                                                                                                                                                                                                                                                                                                                                                                                                                                     | 1.795755 | 2.869491 | 2.641467 | 0.000000 |   |   |      |          |  |  |  |  |      |          |          |  |  |  |     |          |          |          |  |  |     |          |          |          |          |  |     |          |          |          |          |          |     |          |          |          |          |          |     |          |          |          |          |          |     |          |          |          |          |          |      |          |          |          |          |          |      |          |          |          |          |          |      |          |          |          |          |          |       |          |          |          |          |          |  |   |   |   |   |    |     |          |  |  |  |  |     |          |          |  |  |  |     |          |          |          |  |  |      |          |          |          |          |  |      |          |          |          |          |          |      |          |          |          |          |          |       |          |          |          |          |          |  |    |    |  |  |  |      |          |  |  |  |  |       |          |          |  |  |  |
| 6 B                                                                                                                                           | 3.159351                                                                                                                                                                                                                                                                                                                                                                                                                                                                                                                                                                                                                                                                                                                                                                                                                                                                                                                                                                                                                                                                                                                                                                                                                                                                                                                                                                                                                                                                                                                                                                                                                                                                                                                                                                                                                                                                                                                                                                                                                                                                                                                                                                                                                                                                                                                                                                                                                     | 1.761049 | 1.780850 | 2.705481 | 1.761400 |   |   |      |          |  |  |  |  |      |          |          |  |  |  |     |          |          |          |  |  |     |          |          |          |          |  |     |          |          |          |          |          |     |          |          |          |          |          |     |          |          |          |          |          |     |          |          |          |          |          |      |          |          |          |          |          |      |          |          |          |          |          |      |          |          |          |          |          |       |          |          |          |          |          |  |   |   |   |   |    |     |          |  |  |  |  |     |          |          |  |  |  |     |          |          |          |  |  |      |          |          |          |          |  |      |          |          |          |          |          |      |          |          |          |          |          |       |          |          |          |          |          |  |    |    |  |  |  |      |          |  |  |  |  |       |          |          |  |  |  |
| 7 B                                                                                                                                           | 3.597410                                                                                                                                                                                                                                                                                                                                                                                                                                                                                                                                                                                                                                                                                                                                                                                                                                                                                                                                                                                                                                                                                                                                                                                                                                                                                                                                                                                                                                                                                                                                                                                                                                                                                                                                                                                                                                                                                                                                                                                                                                                                                                                                                                                                                                                                                                                                                                                                                     | 1.779608 | 3.048217 | 1.827534 | 1.769108 |   |   |      |          |  |  |  |  |      |          |          |  |  |  |     |          |          |          |  |  |     |          |          |          |          |  |     |          |          |          |          |          |     |          |          |          |          |          |     |          |          |          |          |          |     |          |          |          |          |          |      |          |          |          |          |          |      |          |          |          |          |          |      |          |          |          |          |          |       |          |          |          |          |          |  |   |   |   |   |    |     |          |  |  |  |  |     |          |          |  |  |  |     |          |          |          |  |  |      |          |          |          |          |  |      |          |          |          |          |          |      |          |          |          |          |          |       |          |          |          |          |          |  |    |    |  |  |  |      |          |  |  |  |  |       |          |          |  |  |  |
| 8 B                                                                                                                                           | 2.027968                                                                                                                                                                                                                                                                                                                                                                                                                                                                                                                                                                                                                                                                                                                                                                                                                                                                                                                                                                                                                                                                                                                                                                                                                                                                                                                                                                                                                                                                                                                                                                                                                                                                                                                                                                                                                                                                                                                                                                                                                                                                                                                                                                                                                                                                                                                                                                                                                     | 2.963032 | 1.777746 | 2.906147 | 2.980913 |   |   |      |          |  |  |  |  |      |          |          |  |  |  |     |          |          |          |  |  |     |          |          |          |          |  |     |          |          |          |          |          |     |          |          |          |          |          |     |          |          |          |          |          |     |          |          |          |          |          |      |          |          |          |          |          |      |          |          |          |          |          |      |          |          |          |          |          |       |          |          |          |          |          |  |   |   |   |   |    |     |          |  |  |  |  |     |          |          |  |  |  |     |          |          |          |  |  |      |          |          |          |          |  |      |          |          |          |          |          |      |          |          |          |          |          |       |          |          |          |          |          |  |    |    |  |  |  |      |          |  |  |  |  |       |          |          |  |  |  |
| 9 Ru                                                                                                                                          | 2.819881                                                                                                                                                                                                                                                                                                                                                                                                                                                                                                                                                                                                                                                                                                                                                                                                                                                                                                                                                                                                                                                                                                                                                                                                                                                                                                                                                                                                                                                                                                                                                                                                                                                                                                                                                                                                                                                                                                                                                                                                                                                                                                                                                                                                                                                                                                                                                                                                                     | 3.430345 | 3.643151 | 2.031933 | 3.467624 |   |   |      |          |  |  |  |  |      |          |          |  |  |  |     |          |          |          |  |  |     |          |          |          |          |  |     |          |          |          |          |          |     |          |          |          |          |          |     |          |          |          |          |          |     |          |          |          |          |          |      |          |          |          |          |          |      |          |          |          |          |          |      |          |          |          |          |          |       |          |          |          |          |          |  |   |   |   |   |    |     |          |  |  |  |  |     |          |          |  |  |  |     |          |          |          |  |  |      |          |          |          |          |  |      |          |          |          |          |          |      |          |          |          |          |          |       |          |          |          |          |          |  |    |    |  |  |  |      |          |  |  |  |  |       |          |          |  |  |  |
| 10 B                                                                                                                                          | 3.189218                                                                                                                                                                                                                                                                                                                                                                                                                                                                                                                                                                                                                                                                                                                                                                                                                                                                                                                                                                                                                                                                                                                                                                                                                                                                                                                                                                                                                                                                                                                                                                                                                                                                                                                                                                                                                                                                                                                                                                                                                                                                                                                                                                                                                                                                                                                                                                                                                     | 2.895553 | 3.561103 | 2.629903 | 1.746244 |   |   |      |          |  |  |  |  |      |          |          |  |  |  |     |          |          |          |  |  |     |          |          |          |          |  |     |          |          |          |          |          |     |          |          |          |          |          |     |          |          |          |          |          |     |          |          |          |          |          |      |          |          |          |          |          |      |          |          |          |          |          |      |          |          |          |          |          |       |          |          |          |          |          |  |   |   |   |   |    |     |          |  |  |  |  |     |          |          |  |  |  |     |          |          |          |  |  |      |          |          |          |          |  |      |          |          |          |          |          |      |          |          |          |          |          |       |          |          |          |          |          |  |    |    |  |  |  |      |          |  |  |  |  |       |          |          |  |  |  |
| 11 B                                                                                                                                          | 2.398001                                                                                                                                                                                                                                                                                                                                                                                                                                                                                                                                                                                                                                                                                                                                                                                                                                                                                                                                                                                                                                                                                                                                                                                                                                                                                                                                                                                                                                                                                                                                                                                                                                                                                                                                                                                                                                                                                                                                                                                                                                                                                                                                                                                                                                                                                                                                                                                                                     | 2.905431 | 2.771318 | 2.847139 | 1.888955 |   |   |      |          |  |  |  |  |      |          |          |  |  |  |     |          |          |          |  |  |     |          |          |          |          |  |     |          |          |          |          |          |     |          |          |          |          |          |     |          |          |          |          |          |     |          |          |          |          |          |      |          |          |          |          |          |      |          |          |          |          |          |      |          |          |          |          |          |       |          |          |          |          |          |  |   |   |   |   |    |     |          |  |  |  |  |     |          |          |  |  |  |     |          |          |          |  |  |      |          |          |          |          |  |      |          |          |          |          |          |      |          |          |          |          |          |       |          |          |          |          |          |  |    |    |  |  |  |      |          |  |  |  |  |       |          |          |  |  |  |
| 12 B                                                                                                                                          | 2.040215                                                                                                                                                                                                                                                                                                                                                                                                                                                                                                                                                                                                                                                                                                                                                                                                                                                                                                                                                                                                                                                                                                                                                                                                                                                                                                                                                                                                                                                                                                                                                                                                                                                                                                                                                                                                                                                                                                                                                                                                                                                                                                                                                                                                                                                                                                                                                                                                                     | 3.797963 | 3.570359 | 2.839417 | 3.075401 |   |   |      |          |  |  |  |  |      |          |          |  |  |  |     |          |          |          |  |  |     |          |          |          |          |  |     |          |          |          |          |          |     |          |          |          |          |          |     |          |          |          |          |          |     |          |          |          |          |          |      |          |          |          |          |          |      |          |          |          |          |          |      |          |          |          |          |          |       |          |          |          |          |          |  |   |   |   |   |    |     |          |  |  |  |  |     |          |          |  |  |  |     |          |          |          |  |  |      |          |          |          |          |  |      |          |          |          |          |          |      |          |          |          |          |          |       |          |          |          |          |          |  |    |    |  |  |  |      |          |  |  |  |  |       |          |          |  |  |  |
|                                                                                                                                               | 6                                                                                                                                                                                                                                                                                                                                                                                                                                                                                                                                                                                                                                                                                                                                                                                                                                                                                                                                                                                                                                                                                                                                                                                                                                                                                                                                                                                                                                                                                                                                                                                                                                                                                                                                                                                                                                                                                                                                                                                                                                                                                                                                                                                                                                                                                                                                                                                                                            | 7        | 8        | 9        | 10       |   |   |      |          |  |  |  |  |      |          |          |  |  |  |     |          |          |          |  |  |     |          |          |          |          |  |     |          |          |          |          |          |     |          |          |          |          |          |     |          |          |          |          |          |     |          |          |          |          |          |      |          |          |          |          |          |      |          |          |          |          |          |      |          |          |          |          |          |       |          |          |          |          |          |  |   |   |   |   |    |     |          |  |  |  |  |     |          |          |  |  |  |     |          |          |          |  |  |      |          |          |          |          |  |      |          |          |          |          |          |      |          |          |          |          |          |       |          |          |          |          |          |  |    |    |  |  |  |      |          |  |  |  |  |       |          |          |  |  |  |
| 6 B                                                                                                                                           | 0.000000                                                                                                                                                                                                                                                                                                                                                                                                                                                                                                                                                                                                                                                                                                                                                                                                                                                                                                                                                                                                                                                                                                                                                                                                                                                                                                                                                                                                                                                                                                                                                                                                                                                                                                                                                                                                                                                                                                                                                                                                                                                                                                                                                                                                                                                                                                                                                                                                                     |          |          |          |          |   |   |      |          |  |  |  |  |      |          |          |  |  |  |     |          |          |          |  |  |     |          |          |          |          |  |     |          |          |          |          |          |     |          |          |          |          |          |     |          |          |          |          |          |     |          |          |          |          |          |      |          |          |          |          |          |      |          |          |          |          |          |      |          |          |          |          |          |       |          |          |          |          |          |  |   |   |   |   |    |     |          |  |  |  |  |     |          |          |  |  |  |     |          |          |          |  |  |      |          |          |          |          |  |      |          |          |          |          |          |      |          |          |          |          |          |       |          |          |          |          |          |  |    |    |  |  |  |      |          |  |  |  |  |       |          |          |  |  |  |
| 7 B                                                                                                                                           | 2.951418                                                                                                                                                                                                                                                                                                                                                                                                                                                                                                                                                                                                                                                                                                                                                                                                                                                                                                                                                                                                                                                                                                                                                                                                                                                                                                                                                                                                                                                                                                                                                                                                                                                                                                                                                                                                                                                                                                                                                                                                                                                                                                                                                                                                                                                                                                                                                                                                                     | 0.000000 |          |          |          |   |   |      |          |  |  |  |  |      |          |          |  |  |  |     |          |          |          |  |  |     |          |          |          |          |  |     |          |          |          |          |          |     |          |          |          |          |          |     |          |          |          |          |          |     |          |          |          |          |          |      |          |          |          |          |          |      |          |          |          |          |          |      |          |          |          |          |          |       |          |          |          |          |          |  |   |   |   |   |    |     |          |  |  |  |  |     |          |          |  |  |  |     |          |          |          |  |  |      |          |          |          |          |  |      |          |          |          |          |          |      |          |          |          |          |          |       |          |          |          |          |          |  |    |    |  |  |  |      |          |  |  |  |  |       |          |          |  |  |  |
| 8 B                                                                                                                                           | 1.725105                                                                                                                                                                                                                                                                                                                                                                                                                                                                                                                                                                                                                                                                                                                                                                                                                                                                                                                                                                                                                                                                                                                                                                                                                                                                                                                                                                                                                                                                                                                                                                                                                                                                                                                                                                                                                                                                                                                                                                                                                                                                                                                                                                                                                                                                                                                                                                                                                     | 3.839325 | 0.000000 |          |          |   |   |      |          |  |  |  |  |      |          |          |  |  |  |     |          |          |          |  |  |     |          |          |          |          |  |     |          |          |          |          |          |     |          |          |          |          |          |     |          |          |          |          |          |     |          |          |          |          |          |      |          |          |          |          |          |      |          |          |          |          |          |      |          |          |          |          |          |       |          |          |          |          |          |  |   |   |   |   |    |     |          |  |  |  |  |     |          |          |  |  |  |     |          |          |          |  |  |      |          |          |          |          |  |      |          |          |          |          |          |      |          |          |          |          |          |       |          |          |          |          |          |  |    |    |  |  |  |      |          |  |  |  |  |       |          |          |  |  |  |
| 9 Ru                                                                                                                                          | 4.232171                                                                                                                                                                                                                                                                                                                                                                                                                                                                                                                                                                                                                                                                                                                                                                                                                                                                                                                                                                                                                                                                                                                                                                                                                                                                                                                                                                                                                                                                                                                                                                                                                                                                                                                                                                                                                                                                                                                                                                                                                                                                                                                                                                                                                                                                                                                                                                                                                     | 2.250173 | 4.198801 | 0.000000 |          |   |   |      |          |  |  |  |  |      |          |          |  |  |  |     |          |          |          |  |  |     |          |          |          |          |  |     |          |          |          |          |          |     |          |          |          |          |          |     |          |          |          |          |          |     |          |          |          |          |          |      |          |          |          |          |          |      |          |          |          |          |          |      |          |          |          |          |          |       |          |          |          |          |          |  |   |   |   |   |    |     |          |  |  |  |  |     |          |          |  |  |  |     |          |          |          |  |  |      |          |          |          |          |  |      |          |          |          |          |          |      |          |          |          |          |          |       |          |          |          |          |          |  |    |    |  |  |  |      |          |  |  |  |  |       |          |          |  |  |  |
| 10 B                                                                                                                                          | 3.069107                                                                                                                                                                                                                                                                                                                                                                                                                                                                                                                                                                                                                                                                                                                                                                                                                                                                                                                                                                                                                                                                                                                                                                                                                                                                                                                                                                                                                                                                                                                                                                                                                                                                                                                                                                                                                                                                                                                                                                                                                                                                                                                                                                                                                                                                                                                                                                                                                     | 1.761518 | 3.499188 | 2.294196 | 0.000000 |   |   |      |          |  |  |  |  |      |          |          |  |  |  |     |          |          |          |  |  |     |          |          |          |          |  |     |          |          |          |          |          |     |          |          |          |          |          |     |          |          |          |          |          |     |          |          |          |          |          |      |          |          |          |          |          |      |          |          |          |          |          |      |          |          |          |          |          |       |          |          |          |          |          |  |   |   |   |   |    |     |          |  |  |  |  |     |          |          |  |  |  |     |          |          |          |  |  |      |          |          |          |          |  |      |          |          |          |          |          |      |          |          |          |          |          |       |          |          |          |          |          |  |    |    |  |  |  |      |          |  |  |  |  |       |          |          |  |  |  |
| 11 B                                                                                                                                          | 2.000405                                                                                                                                                                                                                                                                                                                                                                                                                                                                                                                                                                                                                                                                                                                                                                                                                                                                                                                                                                                                                                                                                                                                                                                                                                                                                                                                                                                                                                                                                                                                                                                                                                                                                                                                                                                                                                                                                                                                                                                                                                                                                                                                                                                                                                                                                                                                                                                                                     | 2.920160 | 1.881600 | 3.383956 | 1.887905 |   |   |      |          |  |  |  |  |      |          |          |  |  |  |     |          |          |          |  |  |     |          |          |          |          |  |     |          |          |          |          |          |     |          |          |          |          |          |     |          |          |          |          |          |     |          |          |          |          |          |      |          |          |          |          |          |      |          |          |          |          |          |      |          |          |          |          |          |       |          |          |          |          |          |  |   |   |   |   |    |     |          |  |  |  |  |     |          |          |  |  |  |     |          |          |          |  |  |      |          |          |          |          |  |      |          |          |          |          |          |      |          |          |          |          |          |       |          |          |          |          |          |  |    |    |  |  |  |      |          |  |  |  |  |       |          |          |  |  |  |
| 12 B                                                                                                                                          | 3.588501                                                                                                                                                                                                                                                                                                                                                                                                                                                                                                                                                                                                                                                                                                                                                                                                                                                                                                                                                                                                                                                                                                                                                                                                                                                                                                                                                                                                                                                                                                                                                                                                                                                                                                                                                                                                                                                                                                                                                                                                                                                                                                                                                                                                                                                                                                                                                                                                                     | 3.082769 | 3.077200 | 2.220174 | 1.808575 |   |   |      |          |  |  |  |  |      |          |          |  |  |  |     |          |          |          |  |  |     |          |          |          |          |  |     |          |          |          |          |          |     |          |          |          |          |          |     |          |          |          |          |          |     |          |          |          |          |          |      |          |          |          |          |          |      |          |          |          |          |          |      |          |          |          |          |          |       |          |          |          |          |          |  |   |   |   |   |    |     |          |  |  |  |  |     |          |          |  |  |  |     |          |          |          |  |  |      |          |          |          |          |  |      |          |          |          |          |          |      |          |          |          |          |          |       |          |          |          |          |          |  |    |    |  |  |  |      |          |  |  |  |  |       |          |          |  |  |  |
|                                                                                                                                               | 11                                                                                                                                                                                                                                                                                                                                                                                                                                                                                                                                                                                                                                                                                                                                                                                                                                                                                                                                                                                                                                                                                                                                                                                                                                                                                                                                                                                                                                                                                                                                                                                                                                                                                                                                                                                                                                                                                                                                                                                                                                                                                                                                                                                                                                                                                                                                                                                                                           | 12       |          |          |          |   |   |      |          |  |  |  |  |      |          |          |  |  |  |     |          |          |          |  |  |     |          |          |          |          |  |     |          |          |          |          |          |     |          |          |          |          |          |     |          |          |          |          |          |     |          |          |          |          |          |      |          |          |          |          |          |      |          |          |          |          |          |      |          |          |          |          |          |       |          |          |          |          |          |  |   |   |   |   |    |     |          |  |  |  |  |     |          |          |  |  |  |     |          |          |          |  |  |      |          |          |          |          |  |      |          |          |          |          |          |      |          |          |          |          |          |       |          |          |          |          |          |  |    |    |  |  |  |      |          |  |  |  |  |       |          |          |  |  |  |
| 11 B                                                                                                                                          | 0.000000                                                                                                                                                                                                                                                                                                                                                                                                                                                                                                                                                                                                                                                                                                                                                                                                                                                                                                                                                                                                                                                                                                                                                                                                                                                                                                                                                                                                                                                                                                                                                                                                                                                                                                                                                                                                                                                                                                                                                                                                                                                                                                                                                                                                                                                                                                                                                                                                                     |          |          |          |          |   |   |      |          |  |  |  |  |      |          |          |  |  |  |     |          |          |          |  |  |     |          |          |          |          |  |     |          |          |          |          |          |     |          |          |          |          |          |     |          |          |          |          |          |     |          |          |          |          |          |      |          |          |          |          |          |      |          |          |          |          |          |      |          |          |          |          |          |       |          |          |          |          |          |  |   |   |   |   |    |     |          |  |  |  |  |     |          |          |  |  |  |     |          |          |          |  |  |      |          |          |          |          |  |      |          |          |          |          |          |      |          |          |          |          |          |       |          |          |          |          |          |  |    |    |  |  |  |      |          |  |  |  |  |       |          |          |  |  |  |
| 12 B                                                                                                                                          | 1.877417                                                                                                                                                                                                                                                                                                                                                                                                                                                                                                                                                                                                                                                                                                                                                                                                                                                                                                                                                                                                                                                                                                                                                                                                                                                                                                                                                                                                                                                                                                                                                                                                                                                                                                                                                                                                                                                                                                                                                                                                                                                                                                                                                                                                                                                                                                                                                                                                                     | 0.000000 |          |          |          |   |   |      |          |  |  |  |  |      |          |          |  |  |  |     |          |          |          |  |  |     |          |          |          |          |  |     |          |          |          |          |          |     |          |          |          |          |          |     |          |          |          |          |          |     |          |          |          |          |          |      |          |          |          |          |          |      |          |          |          |          |          |      |          |          |          |          |          |       |          |          |          |          |          |  |   |   |   |   |    |     |          |  |  |  |  |     |          |          |  |  |  |     |          |          |          |  |  |      |          |          |          |          |  |      |          |          |          |          |          |      |          |          |          |          |          |       |          |          |          |          |          |  |    |    |  |  |  |      |          |  |  |  |  |       |          |          |  |  |  |

| 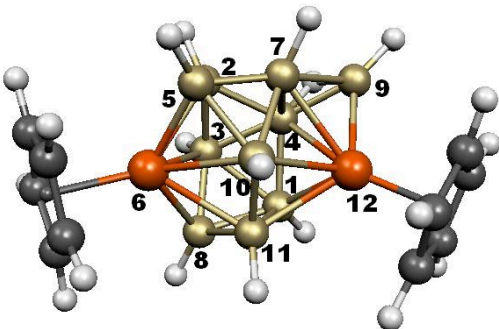 <p>3. -831.61923852 +15.6</p>                 | <table border="1"> <thead> <tr> <th></th> <th>1</th> <th>2</th> <th>3</th> <th>4</th> <th>5</th> </tr> </thead> <tbody> <tr><td>1 B</td><td>0.000000</td><td></td><td></td><td></td><td></td></tr> <tr><td>2 B</td><td>3.016561</td><td>0.000000</td><td></td><td></td><td></td></tr> <tr><td>3 B</td><td>1.906828</td><td>1.739576</td><td>0.000000</td><td></td><td></td></tr> <tr><td>4 B</td><td>1.815739</td><td>1.795057</td><td>1.764432</td><td>0.000000</td><td></td></tr> <tr><td>5 B</td><td>3.798976</td><td>1.764601</td><td>3.082594</td><td>2.902512</td><td>0.000000</td></tr> <tr><td>6 Ru</td><td>3.138317</td><td>2.243283</td><td>2.284544</td><td>3.174489</td><td>2.045949</td></tr> <tr><td>7 B</td><td>3.163724</td><td>1.879899</td><td>3.012197</td><td>1.845177</td><td>1.734702</td></tr> <tr><td>8 B</td><td>1.721788</td><td>3.046520</td><td>1.757221</td><td>2.852946</td><td>3.616554</td></tr> <tr><td>9 B</td><td>3.013224</td><td>2.989520</td><td>3.441625</td><td>1.678744</td><td>3.600456</td></tr> <tr><td>10 B</td><td>3.002802</td><td>2.746933</td><td>3.277715</td><td>2.791628</td><td>1.799353</td></tr> <tr><td>11 B</td><td>1.849750</td><td>3.232042</td><td>2.724873</td><td>2.779048</td><td>3.091154</td></tr> <tr><td>12 Ru</td><td>2.231897</td><td>3.458648</td><td>3.463326</td><td>2.198044</td><td>3.481045</td></tr> <tr> <td></td> <td>6</td> <td>7</td> <td>8</td> <td>9</td> <td>10</td> </tr> <tr><td>6 Ru</td><td>0.000000</td><td></td><td></td><td></td><td></td></tr> <tr><td>7 B</td><td>3.126236</td><td>0.000000</td><td></td><td></td><td></td></tr> <tr><td>8 B</td><td>2.077613</td><td>3.797401</td><td>0.000000</td><td></td><td></td></tr> <tr><td>9 B</td><td>4.524734</td><td>1.915317</td><td>4.360299</td><td>0.000000</td><td></td></tr> <tr><td>10 B</td><td>2.350078</td><td>1.887856</td><td>3.110499</td><td>3.301488</td><td>0.000000</td></tr> <tr><td>11 B</td><td>2.304350</td><td>3.045863</td><td>1.749427</td><td>3.763290</td><td>1.789325</td></tr> <tr><td>12 Ru</td><td>3.895945</td><td>2.262267</td><td>3.477183</td><td>2.027865</td><td>2.202198</td></tr> <tr> <td></td> <td>11</td> <td>12</td> <td></td> <td></td> <td></td> </tr> <tr><td>11 B</td><td>0.000000</td><td></td><td></td><td></td><td></td></tr> <tr><td>12 Ru</td><td>2.260099</td><td>0.000000</td><td></td><td></td><td></td></tr> </tbody> </table> |          | 1        | 2        | 3        | 4 | 5 | 1 B | 0.000000 |  |  |  |  | 2 B  | 3.016561 | 0.000000 |  |  |  | 3 B | 1.906828 | 1.739576 | 0.000000 |  |  | 4 B | 1.815739 | 1.795057 | 1.764432 | 0.000000 |  | 5 B | 3.798976 | 1.764601 | 3.082594 | 2.902512 | 0.000000 | 6 Ru | 3.138317 | 2.243283 | 2.284544 | 3.174489 | 2.045949 | 7 B  | 3.163724 | 1.879899 | 3.012197 | 1.845177 | 1.734702 | 8 B | 1.721788 | 3.046520 | 1.757221 | 2.852946 | 3.616554 | 9 B | 3.013224 | 2.989520 | 3.441625 | 1.678744 | 3.600456 | 10 B | 3.002802 | 2.746933 | 3.277715 | 2.791628 | 1.799353 | 11 B | 1.849750 | 3.232042 | 2.724873 | 2.779048 | 3.091154 | 12 Ru | 2.231897 | 3.458648 | 3.463326 | 2.198044 | 3.481045 |  | 6 | 7 | 8 | 9 | 10 | 6 Ru | 0.000000 |  |  |  |  | 7 B  | 3.126236 | 0.000000 |  |  |  | 8 B | 2.077613 | 3.797401 | 0.000000 |  |  | 9 B | 4.524734 | 1.915317 | 4.360299 | 0.000000 |  | 10 B | 2.350078 | 1.887856 | 3.110499 | 3.301488 | 0.000000 | 11 B | 2.304350 | 3.045863 | 1.749427 | 3.763290 | 1.789325 | 12 Ru | 3.895945 | 2.262267 | 3.477183 | 2.027865 | 2.202198 |  | 11 | 12 |  |  |  | 11 B | 0.000000 |  |  |  |  | 12 Ru | 2.260099 | 0.000000 |  |  |  |
|---------------------------------------------------------------------------------------------------------------------------------|-------------------------------------------------------------------------------------------------------------------------------------------------------------------------------------------------------------------------------------------------------------------------------------------------------------------------------------------------------------------------------------------------------------------------------------------------------------------------------------------------------------------------------------------------------------------------------------------------------------------------------------------------------------------------------------------------------------------------------------------------------------------------------------------------------------------------------------------------------------------------------------------------------------------------------------------------------------------------------------------------------------------------------------------------------------------------------------------------------------------------------------------------------------------------------------------------------------------------------------------------------------------------------------------------------------------------------------------------------------------------------------------------------------------------------------------------------------------------------------------------------------------------------------------------------------------------------------------------------------------------------------------------------------------------------------------------------------------------------------------------------------------------------------------------------------------------------------------------------------------------------------------------------------------------------------------------------------------------------------------------------------------------------------------------------------------------------------------------------------------------------------------------------------------------------------------------------------------------------------------------------------------------------------------------------------------------------------------------------------------------------------------------------------------------------|----------|----------|----------|----------|---|---|-----|----------|--|--|--|--|------|----------|----------|--|--|--|-----|----------|----------|----------|--|--|-----|----------|----------|----------|----------|--|-----|----------|----------|----------|----------|----------|------|----------|----------|----------|----------|----------|------|----------|----------|----------|----------|----------|-----|----------|----------|----------|----------|----------|-----|----------|----------|----------|----------|----------|------|----------|----------|----------|----------|----------|------|----------|----------|----------|----------|----------|-------|----------|----------|----------|----------|----------|--|---|---|---|---|----|------|----------|--|--|--|--|------|----------|----------|--|--|--|-----|----------|----------|----------|--|--|-----|----------|----------|----------|----------|--|------|----------|----------|----------|----------|----------|------|----------|----------|----------|----------|----------|-------|----------|----------|----------|----------|----------|--|----|----|--|--|--|------|----------|--|--|--|--|-------|----------|----------|--|--|--|
|                                                                                                                                 | 1                                                                                                                                                                                                                                                                                                                                                                                                                                                                                                                                                                                                                                                                                                                                                                                                                                                                                                                                                                                                                                                                                                                                                                                                                                                                                                                                                                                                                                                                                                                                                                                                                                                                                                                                                                                                                                                                                                                                                                                                                                                                                                                                                                                                                                                                                                                                                                                                                             | 2        | 3        | 4        | 5        |   |   |     |          |  |  |  |  |      |          |          |  |  |  |     |          |          |          |  |  |     |          |          |          |          |  |     |          |          |          |          |          |      |          |          |          |          |          |      |          |          |          |          |          |     |          |          |          |          |          |     |          |          |          |          |          |      |          |          |          |          |          |      |          |          |          |          |          |       |          |          |          |          |          |  |   |   |   |   |    |      |          |  |  |  |  |      |          |          |  |  |  |     |          |          |          |  |  |     |          |          |          |          |  |      |          |          |          |          |          |      |          |          |          |          |          |       |          |          |          |          |          |  |    |    |  |  |  |      |          |  |  |  |  |       |          |          |  |  |  |
| 1 B                                                                                                                             | 0.000000                                                                                                                                                                                                                                                                                                                                                                                                                                                                                                                                                                                                                                                                                                                                                                                                                                                                                                                                                                                                                                                                                                                                                                                                                                                                                                                                                                                                                                                                                                                                                                                                                                                                                                                                                                                                                                                                                                                                                                                                                                                                                                                                                                                                                                                                                                                                                                                                                      |          |          |          |          |   |   |     |          |  |  |  |  |      |          |          |  |  |  |     |          |          |          |  |  |     |          |          |          |          |  |     |          |          |          |          |          |      |          |          |          |          |          |      |          |          |          |          |          |     |          |          |          |          |          |     |          |          |          |          |          |      |          |          |          |          |          |      |          |          |          |          |          |       |          |          |          |          |          |  |   |   |   |   |    |      |          |  |  |  |  |      |          |          |  |  |  |     |          |          |          |  |  |     |          |          |          |          |  |      |          |          |          |          |          |      |          |          |          |          |          |       |          |          |          |          |          |  |    |    |  |  |  |      |          |  |  |  |  |       |          |          |  |  |  |
| 2 B                                                                                                                             | 3.016561                                                                                                                                                                                                                                                                                                                                                                                                                                                                                                                                                                                                                                                                                                                                                                                                                                                                                                                                                                                                                                                                                                                                                                                                                                                                                                                                                                                                                                                                                                                                                                                                                                                                                                                                                                                                                                                                                                                                                                                                                                                                                                                                                                                                                                                                                                                                                                                                                      | 0.000000 |          |          |          |   |   |     |          |  |  |  |  |      |          |          |  |  |  |     |          |          |          |  |  |     |          |          |          |          |  |     |          |          |          |          |          |      |          |          |          |          |          |      |          |          |          |          |          |     |          |          |          |          |          |     |          |          |          |          |          |      |          |          |          |          |          |      |          |          |          |          |          |       |          |          |          |          |          |  |   |   |   |   |    |      |          |  |  |  |  |      |          |          |  |  |  |     |          |          |          |  |  |     |          |          |          |          |  |      |          |          |          |          |          |      |          |          |          |          |          |       |          |          |          |          |          |  |    |    |  |  |  |      |          |  |  |  |  |       |          |          |  |  |  |
| 3 B                                                                                                                             | 1.906828                                                                                                                                                                                                                                                                                                                                                                                                                                                                                                                                                                                                                                                                                                                                                                                                                                                                                                                                                                                                                                                                                                                                                                                                                                                                                                                                                                                                                                                                                                                                                                                                                                                                                                                                                                                                                                                                                                                                                                                                                                                                                                                                                                                                                                                                                                                                                                                                                      | 1.739576 | 0.000000 |          |          |   |   |     |          |  |  |  |  |      |          |          |  |  |  |     |          |          |          |  |  |     |          |          |          |          |  |     |          |          |          |          |          |      |          |          |          |          |          |      |          |          |          |          |          |     |          |          |          |          |          |     |          |          |          |          |          |      |          |          |          |          |          |      |          |          |          |          |          |       |          |          |          |          |          |  |   |   |   |   |    |      |          |  |  |  |  |      |          |          |  |  |  |     |          |          |          |  |  |     |          |          |          |          |  |      |          |          |          |          |          |      |          |          |          |          |          |       |          |          |          |          |          |  |    |    |  |  |  |      |          |  |  |  |  |       |          |          |  |  |  |
| 4 B                                                                                                                             | 1.815739                                                                                                                                                                                                                                                                                                                                                                                                                                                                                                                                                                                                                                                                                                                                                                                                                                                                                                                                                                                                                                                                                                                                                                                                                                                                                                                                                                                                                                                                                                                                                                                                                                                                                                                                                                                                                                                                                                                                                                                                                                                                                                                                                                                                                                                                                                                                                                                                                      | 1.795057 | 1.764432 | 0.000000 |          |   |   |     |          |  |  |  |  |      |          |          |  |  |  |     |          |          |          |  |  |     |          |          |          |          |  |     |          |          |          |          |          |      |          |          |          |          |          |      |          |          |          |          |          |     |          |          |          |          |          |     |          |          |          |          |          |      |          |          |          |          |          |      |          |          |          |          |          |       |          |          |          |          |          |  |   |   |   |   |    |      |          |  |  |  |  |      |          |          |  |  |  |     |          |          |          |  |  |     |          |          |          |          |  |      |          |          |          |          |          |      |          |          |          |          |          |       |          |          |          |          |          |  |    |    |  |  |  |      |          |  |  |  |  |       |          |          |  |  |  |
| 5 B                                                                                                                             | 3.798976                                                                                                                                                                                                                                                                                                                                                                                                                                                                                                                                                                                                                                                                                                                                                                                                                                                                                                                                                                                                                                                                                                                                                                                                                                                                                                                                                                                                                                                                                                                                                                                                                                                                                                                                                                                                                                                                                                                                                                                                                                                                                                                                                                                                                                                                                                                                                                                                                      | 1.764601 | 3.082594 | 2.902512 | 0.000000 |   |   |     |          |  |  |  |  |      |          |          |  |  |  |     |          |          |          |  |  |     |          |          |          |          |  |     |          |          |          |          |          |      |          |          |          |          |          |      |          |          |          |          |          |     |          |          |          |          |          |     |          |          |          |          |          |      |          |          |          |          |          |      |          |          |          |          |          |       |          |          |          |          |          |  |   |   |   |   |    |      |          |  |  |  |  |      |          |          |  |  |  |     |          |          |          |  |  |     |          |          |          |          |  |      |          |          |          |          |          |      |          |          |          |          |          |       |          |          |          |          |          |  |    |    |  |  |  |      |          |  |  |  |  |       |          |          |  |  |  |
| 6 Ru                                                                                                                            | 3.138317                                                                                                                                                                                                                                                                                                                                                                                                                                                                                                                                                                                                                                                                                                                                                                                                                                                                                                                                                                                                                                                                                                                                                                                                                                                                                                                                                                                                                                                                                                                                                                                                                                                                                                                                                                                                                                                                                                                                                                                                                                                                                                                                                                                                                                                                                                                                                                                                                      | 2.243283 | 2.284544 | 3.174489 | 2.045949 |   |   |     |          |  |  |  |  |      |          |          |  |  |  |     |          |          |          |  |  |     |          |          |          |          |  |     |          |          |          |          |          |      |          |          |          |          |          |      |          |          |          |          |          |     |          |          |          |          |          |     |          |          |          |          |          |      |          |          |          |          |          |      |          |          |          |          |          |       |          |          |          |          |          |  |   |   |   |   |    |      |          |  |  |  |  |      |          |          |  |  |  |     |          |          |          |  |  |     |          |          |          |          |  |      |          |          |          |          |          |      |          |          |          |          |          |       |          |          |          |          |          |  |    |    |  |  |  |      |          |  |  |  |  |       |          |          |  |  |  |
| 7 B                                                                                                                             | 3.163724                                                                                                                                                                                                                                                                                                                                                                                                                                                                                                                                                                                                                                                                                                                                                                                                                                                                                                                                                                                                                                                                                                                                                                                                                                                                                                                                                                                                                                                                                                                                                                                                                                                                                                                                                                                                                                                                                                                                                                                                                                                                                                                                                                                                                                                                                                                                                                                                                      | 1.879899 | 3.012197 | 1.845177 | 1.734702 |   |   |     |          |  |  |  |  |      |          |          |  |  |  |     |          |          |          |  |  |     |          |          |          |          |  |     |          |          |          |          |          |      |          |          |          |          |          |      |          |          |          |          |          |     |          |          |          |          |          |     |          |          |          |          |          |      |          |          |          |          |          |      |          |          |          |          |          |       |          |          |          |          |          |  |   |   |   |   |    |      |          |  |  |  |  |      |          |          |  |  |  |     |          |          |          |  |  |     |          |          |          |          |  |      |          |          |          |          |          |      |          |          |          |          |          |       |          |          |          |          |          |  |    |    |  |  |  |      |          |  |  |  |  |       |          |          |  |  |  |
| 8 B                                                                                                                             | 1.721788                                                                                                                                                                                                                                                                                                                                                                                                                                                                                                                                                                                                                                                                                                                                                                                                                                                                                                                                                                                                                                                                                                                                                                                                                                                                                                                                                                                                                                                                                                                                                                                                                                                                                                                                                                                                                                                                                                                                                                                                                                                                                                                                                                                                                                                                                                                                                                                                                      | 3.046520 | 1.757221 | 2.852946 | 3.616554 |   |   |     |          |  |  |  |  |      |          |          |  |  |  |     |          |          |          |  |  |     |          |          |          |          |  |     |          |          |          |          |          |      |          |          |          |          |          |      |          |          |          |          |          |     |          |          |          |          |          |     |          |          |          |          |          |      |          |          |          |          |          |      |          |          |          |          |          |       |          |          |          |          |          |  |   |   |   |   |    |      |          |  |  |  |  |      |          |          |  |  |  |     |          |          |          |  |  |     |          |          |          |          |  |      |          |          |          |          |          |      |          |          |          |          |          |       |          |          |          |          |          |  |    |    |  |  |  |      |          |  |  |  |  |       |          |          |  |  |  |
| 9 B                                                                                                                             | 3.013224                                                                                                                                                                                                                                                                                                                                                                                                                                                                                                                                                                                                                                                                                                                                                                                                                                                                                                                                                                                                                                                                                                                                                                                                                                                                                                                                                                                                                                                                                                                                                                                                                                                                                                                                                                                                                                                                                                                                                                                                                                                                                                                                                                                                                                                                                                                                                                                                                      | 2.989520 | 3.441625 | 1.678744 | 3.600456 |   |   |     |          |  |  |  |  |      |          |          |  |  |  |     |          |          |          |  |  |     |          |          |          |          |  |     |          |          |          |          |          |      |          |          |          |          |          |      |          |          |          |          |          |     |          |          |          |          |          |     |          |          |          |          |          |      |          |          |          |          |          |      |          |          |          |          |          |       |          |          |          |          |          |  |   |   |   |   |    |      |          |  |  |  |  |      |          |          |  |  |  |     |          |          |          |  |  |     |          |          |          |          |  |      |          |          |          |          |          |      |          |          |          |          |          |       |          |          |          |          |          |  |    |    |  |  |  |      |          |  |  |  |  |       |          |          |  |  |  |
| 10 B                                                                                                                            | 3.002802                                                                                                                                                                                                                                                                                                                                                                                                                                                                                                                                                                                                                                                                                                                                                                                                                                                                                                                                                                                                                                                                                                                                                                                                                                                                                                                                                                                                                                                                                                                                                                                                                                                                                                                                                                                                                                                                                                                                                                                                                                                                                                                                                                                                                                                                                                                                                                                                                      | 2.746933 | 3.277715 | 2.791628 | 1.799353 |   |   |     |          |  |  |  |  |      |          |          |  |  |  |     |          |          |          |  |  |     |          |          |          |          |  |     |          |          |          |          |          |      |          |          |          |          |          |      |          |          |          |          |          |     |          |          |          |          |          |     |          |          |          |          |          |      |          |          |          |          |          |      |          |          |          |          |          |       |          |          |          |          |          |  |   |   |   |   |    |      |          |  |  |  |  |      |          |          |  |  |  |     |          |          |          |  |  |     |          |          |          |          |  |      |          |          |          |          |          |      |          |          |          |          |          |       |          |          |          |          |          |  |    |    |  |  |  |      |          |  |  |  |  |       |          |          |  |  |  |
| 11 B                                                                                                                            | 1.849750                                                                                                                                                                                                                                                                                                                                                                                                                                                                                                                                                                                                                                                                                                                                                                                                                                                                                                                                                                                                                                                                                                                                                                                                                                                                                                                                                                                                                                                                                                                                                                                                                                                                                                                                                                                                                                                                                                                                                                                                                                                                                                                                                                                                                                                                                                                                                                                                                      | 3.232042 | 2.724873 | 2.779048 | 3.091154 |   |   |     |          |  |  |  |  |      |          |          |  |  |  |     |          |          |          |  |  |     |          |          |          |          |  |     |          |          |          |          |          |      |          |          |          |          |          |      |          |          |          |          |          |     |          |          |          |          |          |     |          |          |          |          |          |      |          |          |          |          |          |      |          |          |          |          |          |       |          |          |          |          |          |  |   |   |   |   |    |      |          |  |  |  |  |      |          |          |  |  |  |     |          |          |          |  |  |     |          |          |          |          |  |      |          |          |          |          |          |      |          |          |          |          |          |       |          |          |          |          |          |  |    |    |  |  |  |      |          |  |  |  |  |       |          |          |  |  |  |
| 12 Ru                                                                                                                           | 2.231897                                                                                                                                                                                                                                                                                                                                                                                                                                                                                                                                                                                                                                                                                                                                                                                                                                                                                                                                                                                                                                                                                                                                                                                                                                                                                                                                                                                                                                                                                                                                                                                                                                                                                                                                                                                                                                                                                                                                                                                                                                                                                                                                                                                                                                                                                                                                                                                                                      | 3.458648 | 3.463326 | 2.198044 | 3.481045 |   |   |     |          |  |  |  |  |      |          |          |  |  |  |     |          |          |          |  |  |     |          |          |          |          |  |     |          |          |          |          |          |      |          |          |          |          |          |      |          |          |          |          |          |     |          |          |          |          |          |     |          |          |          |          |          |      |          |          |          |          |          |      |          |          |          |          |          |       |          |          |          |          |          |  |   |   |   |   |    |      |          |  |  |  |  |      |          |          |  |  |  |     |          |          |          |  |  |     |          |          |          |          |  |      |          |          |          |          |          |      |          |          |          |          |          |       |          |          |          |          |          |  |    |    |  |  |  |      |          |  |  |  |  |       |          |          |  |  |  |
|                                                                                                                                 | 6                                                                                                                                                                                                                                                                                                                                                                                                                                                                                                                                                                                                                                                                                                                                                                                                                                                                                                                                                                                                                                                                                                                                                                                                                                                                                                                                                                                                                                                                                                                                                                                                                                                                                                                                                                                                                                                                                                                                                                                                                                                                                                                                                                                                                                                                                                                                                                                                                             | 7        | 8        | 9        | 10       |   |   |     |          |  |  |  |  |      |          |          |  |  |  |     |          |          |          |  |  |     |          |          |          |          |  |     |          |          |          |          |          |      |          |          |          |          |          |      |          |          |          |          |          |     |          |          |          |          |          |     |          |          |          |          |          |      |          |          |          |          |          |      |          |          |          |          |          |       |          |          |          |          |          |  |   |   |   |   |    |      |          |  |  |  |  |      |          |          |  |  |  |     |          |          |          |  |  |     |          |          |          |          |  |      |          |          |          |          |          |      |          |          |          |          |          |       |          |          |          |          |          |  |    |    |  |  |  |      |          |  |  |  |  |       |          |          |  |  |  |
| 6 Ru                                                                                                                            | 0.000000                                                                                                                                                                                                                                                                                                                                                                                                                                                                                                                                                                                                                                                                                                                                                                                                                                                                                                                                                                                                                                                                                                                                                                                                                                                                                                                                                                                                                                                                                                                                                                                                                                                                                                                                                                                                                                                                                                                                                                                                                                                                                                                                                                                                                                                                                                                                                                                                                      |          |          |          |          |   |   |     |          |  |  |  |  |      |          |          |  |  |  |     |          |          |          |  |  |     |          |          |          |          |  |     |          |          |          |          |          |      |          |          |          |          |          |      |          |          |          |          |          |     |          |          |          |          |          |     |          |          |          |          |          |      |          |          |          |          |          |      |          |          |          |          |          |       |          |          |          |          |          |  |   |   |   |   |    |      |          |  |  |  |  |      |          |          |  |  |  |     |          |          |          |  |  |     |          |          |          |          |  |      |          |          |          |          |          |      |          |          |          |          |          |       |          |          |          |          |          |  |    |    |  |  |  |      |          |  |  |  |  |       |          |          |  |  |  |
| 7 B                                                                                                                             | 3.126236                                                                                                                                                                                                                                                                                                                                                                                                                                                                                                                                                                                                                                                                                                                                                                                                                                                                                                                                                                                                                                                                                                                                                                                                                                                                                                                                                                                                                                                                                                                                                                                                                                                                                                                                                                                                                                                                                                                                                                                                                                                                                                                                                                                                                                                                                                                                                                                                                      | 0.000000 |          |          |          |   |   |     |          |  |  |  |  |      |          |          |  |  |  |     |          |          |          |  |  |     |          |          |          |          |  |     |          |          |          |          |          |      |          |          |          |          |          |      |          |          |          |          |          |     |          |          |          |          |          |     |          |          |          |          |          |      |          |          |          |          |          |      |          |          |          |          |          |       |          |          |          |          |          |  |   |   |   |   |    |      |          |  |  |  |  |      |          |          |  |  |  |     |          |          |          |  |  |     |          |          |          |          |  |      |          |          |          |          |          |      |          |          |          |          |          |       |          |          |          |          |          |  |    |    |  |  |  |      |          |  |  |  |  |       |          |          |  |  |  |
| 8 B                                                                                                                             | 2.077613                                                                                                                                                                                                                                                                                                                                                                                                                                                                                                                                                                                                                                                                                                                                                                                                                                                                                                                                                                                                                                                                                                                                                                                                                                                                                                                                                                                                                                                                                                                                                                                                                                                                                                                                                                                                                                                                                                                                                                                                                                                                                                                                                                                                                                                                                                                                                                                                                      | 3.797401 | 0.000000 |          |          |   |   |     |          |  |  |  |  |      |          |          |  |  |  |     |          |          |          |  |  |     |          |          |          |          |  |     |          |          |          |          |          |      |          |          |          |          |          |      |          |          |          |          |          |     |          |          |          |          |          |     |          |          |          |          |          |      |          |          |          |          |          |      |          |          |          |          |          |       |          |          |          |          |          |  |   |   |   |   |    |      |          |  |  |  |  |      |          |          |  |  |  |     |          |          |          |  |  |     |          |          |          |          |  |      |          |          |          |          |          |      |          |          |          |          |          |       |          |          |          |          |          |  |    |    |  |  |  |      |          |  |  |  |  |       |          |          |  |  |  |
| 9 B                                                                                                                             | 4.524734                                                                                                                                                                                                                                                                                                                                                                                                                                                                                                                                                                                                                                                                                                                                                                                                                                                                                                                                                                                                                                                                                                                                                                                                                                                                                                                                                                                                                                                                                                                                                                                                                                                                                                                                                                                                                                                                                                                                                                                                                                                                                                                                                                                                                                                                                                                                                                                                                      | 1.915317 | 4.360299 | 0.000000 |          |   |   |     |          |  |  |  |  |      |          |          |  |  |  |     |          |          |          |  |  |     |          |          |          |          |  |     |          |          |          |          |          |      |          |          |          |          |          |      |          |          |          |          |          |     |          |          |          |          |          |     |          |          |          |          |          |      |          |          |          |          |          |      |          |          |          |          |          |       |          |          |          |          |          |  |   |   |   |   |    |      |          |  |  |  |  |      |          |          |  |  |  |     |          |          |          |  |  |     |          |          |          |          |  |      |          |          |          |          |          |      |          |          |          |          |          |       |          |          |          |          |          |  |    |    |  |  |  |      |          |  |  |  |  |       |          |          |  |  |  |
| 10 B                                                                                                                            | 2.350078                                                                                                                                                                                                                                                                                                                                                                                                                                                                                                                                                                                                                                                                                                                                                                                                                                                                                                                                                                                                                                                                                                                                                                                                                                                                                                                                                                                                                                                                                                                                                                                                                                                                                                                                                                                                                                                                                                                                                                                                                                                                                                                                                                                                                                                                                                                                                                                                                      | 1.887856 | 3.110499 | 3.301488 | 0.000000 |   |   |     |          |  |  |  |  |      |          |          |  |  |  |     |          |          |          |  |  |     |          |          |          |          |  |     |          |          |          |          |          |      |          |          |          |          |          |      |          |          |          |          |          |     |          |          |          |          |          |     |          |          |          |          |          |      |          |          |          |          |          |      |          |          |          |          |          |       |          |          |          |          |          |  |   |   |   |   |    |      |          |  |  |  |  |      |          |          |  |  |  |     |          |          |          |  |  |     |          |          |          |          |  |      |          |          |          |          |          |      |          |          |          |          |          |       |          |          |          |          |          |  |    |    |  |  |  |      |          |  |  |  |  |       |          |          |  |  |  |
| 11 B                                                                                                                            | 2.304350                                                                                                                                                                                                                                                                                                                                                                                                                                                                                                                                                                                                                                                                                                                                                                                                                                                                                                                                                                                                                                                                                                                                                                                                                                                                                                                                                                                                                                                                                                                                                                                                                                                                                                                                                                                                                                                                                                                                                                                                                                                                                                                                                                                                                                                                                                                                                                                                                      | 3.045863 | 1.749427 | 3.763290 | 1.789325 |   |   |     |          |  |  |  |  |      |          |          |  |  |  |     |          |          |          |  |  |     |          |          |          |          |  |     |          |          |          |          |          |      |          |          |          |          |          |      |          |          |          |          |          |     |          |          |          |          |          |     |          |          |          |          |          |      |          |          |          |          |          |      |          |          |          |          |          |       |          |          |          |          |          |  |   |   |   |   |    |      |          |  |  |  |  |      |          |          |  |  |  |     |          |          |          |  |  |     |          |          |          |          |  |      |          |          |          |          |          |      |          |          |          |          |          |       |          |          |          |          |          |  |    |    |  |  |  |      |          |  |  |  |  |       |          |          |  |  |  |
| 12 Ru                                                                                                                           | 3.895945                                                                                                                                                                                                                                                                                                                                                                                                                                                                                                                                                                                                                                                                                                                                                                                                                                                                                                                                                                                                                                                                                                                                                                                                                                                                                                                                                                                                                                                                                                                                                                                                                                                                                                                                                                                                                                                                                                                                                                                                                                                                                                                                                                                                                                                                                                                                                                                                                      | 2.262267 | 3.477183 | 2.027865 | 2.202198 |   |   |     |          |  |  |  |  |      |          |          |  |  |  |     |          |          |          |  |  |     |          |          |          |          |  |     |          |          |          |          |          |      |          |          |          |          |          |      |          |          |          |          |          |     |          |          |          |          |          |     |          |          |          |          |          |      |          |          |          |          |          |      |          |          |          |          |          |       |          |          |          |          |          |  |   |   |   |   |    |      |          |  |  |  |  |      |          |          |  |  |  |     |          |          |          |  |  |     |          |          |          |          |  |      |          |          |          |          |          |      |          |          |          |          |          |       |          |          |          |          |          |  |    |    |  |  |  |      |          |  |  |  |  |       |          |          |  |  |  |
|                                                                                                                                 | 11                                                                                                                                                                                                                                                                                                                                                                                                                                                                                                                                                                                                                                                                                                                                                                                                                                                                                                                                                                                                                                                                                                                                                                                                                                                                                                                                                                                                                                                                                                                                                                                                                                                                                                                                                                                                                                                                                                                                                                                                                                                                                                                                                                                                                                                                                                                                                                                                                            | 12       |          |          |          |   |   |     |          |  |  |  |  |      |          |          |  |  |  |     |          |          |          |  |  |     |          |          |          |          |  |     |          |          |          |          |          |      |          |          |          |          |          |      |          |          |          |          |          |     |          |          |          |          |          |     |          |          |          |          |          |      |          |          |          |          |          |      |          |          |          |          |          |       |          |          |          |          |          |  |   |   |   |   |    |      |          |  |  |  |  |      |          |          |  |  |  |     |          |          |          |  |  |     |          |          |          |          |  |      |          |          |          |          |          |      |          |          |          |          |          |       |          |          |          |          |          |  |    |    |  |  |  |      |          |  |  |  |  |       |          |          |  |  |  |
| 11 B                                                                                                                            | 0.000000                                                                                                                                                                                                                                                                                                                                                                                                                                                                                                                                                                                                                                                                                                                                                                                                                                                                                                                                                                                                                                                                                                                                                                                                                                                                                                                                                                                                                                                                                                                                                                                                                                                                                                                                                                                                                                                                                                                                                                                                                                                                                                                                                                                                                                                                                                                                                                                                                      |          |          |          |          |   |   |     |          |  |  |  |  |      |          |          |  |  |  |     |          |          |          |  |  |     |          |          |          |          |  |     |          |          |          |          |          |      |          |          |          |          |          |      |          |          |          |          |          |     |          |          |          |          |          |     |          |          |          |          |          |      |          |          |          |          |          |      |          |          |          |          |          |       |          |          |          |          |          |  |   |   |   |   |    |      |          |  |  |  |  |      |          |          |  |  |  |     |          |          |          |  |  |     |          |          |          |          |  |      |          |          |          |          |          |      |          |          |          |          |          |       |          |          |          |          |          |  |    |    |  |  |  |      |          |  |  |  |  |       |          |          |  |  |  |
| 12 Ru                                                                                                                           | 2.260099                                                                                                                                                                                                                                                                                                                                                                                                                                                                                                                                                                                                                                                                                                                                                                                                                                                                                                                                                                                                                                                                                                                                                                                                                                                                                                                                                                                                                                                                                                                                                                                                                                                                                                                                                                                                                                                                                                                                                                                                                                                                                                                                                                                                                                                                                                                                                                                                                      | 0.000000 |          |          |          |   |   |     |          |  |  |  |  |      |          |          |  |  |  |     |          |          |          |  |  |     |          |          |          |          |  |     |          |          |          |          |          |      |          |          |          |          |          |      |          |          |          |          |          |     |          |          |          |          |          |     |          |          |          |          |          |      |          |          |          |          |          |      |          |          |          |          |          |       |          |          |          |          |          |  |   |   |   |   |    |      |          |  |  |  |  |      |          |          |  |  |  |     |          |          |          |  |  |     |          |          |          |          |  |      |          |          |          |          |          |      |          |          |          |          |          |       |          |          |          |          |          |  |    |    |  |  |  |      |          |  |  |  |  |       |          |          |  |  |  |
|  <p>4. -831.61473009 +18.4 C<sub>2v</sub></p> | <table border="1"> <thead> <tr> <th></th> <th>1</th> <th>2</th> <th>3</th> <th>4</th> <th>5</th> </tr> </thead> <tbody> <tr><td>1 B</td><td>0.000000</td><td></td><td></td><td></td><td></td></tr> <tr><td>2 Ru</td><td>4.175444</td><td>0.000000</td><td></td><td></td><td></td></tr> <tr><td>3 B</td><td>1.749686</td><td>3.364600</td><td>0.000000</td><td></td><td></td></tr> <tr><td>4 B</td><td>1.894009</td><td>3.168589</td><td>1.926932</td><td>0.000000</td><td></td></tr> <tr><td>5 B</td><td>3.630200</td><td>2.051710</td><td>3.038423</td><td>1.894009</td><td>0.000000</td></tr> <tr><td>6 B</td><td>3.038440</td><td>2.264477</td><td>1.699800</td><td>1.926987</td><td>1.749716</td></tr> <tr><td>7 Ru</td><td>2.051710</td><td>3.643000</td><td>2.264545</td><td>3.168589</td><td>4.175444</td></tr> <tr><td>8 B</td><td>3.616832</td><td>2.115927</td><td>3.058257</td><td>3.669400</td><td>3.616832</td></tr> <tr><td>9 B</td><td>1.749716</td><td>3.364555</td><td>2.723200</td><td>1.926987</td><td>3.038440</td></tr> <tr><td>10 B</td><td>3.090345</td><td>2.308940</td><td>3.287583</td><td>2.962586</td><td>3.090345</td></tr> <tr><td>11 B</td><td>3.038440</td><td>2.264477</td><td>3.210162</td><td>1.926987</td><td>1.749716</td></tr> <tr><td>12 B</td><td>3.090345</td><td>2.308940</td><td>1.755079</td><td>2.962586</td><td>3.090345</td></tr> <tr> <td></td> <td>6</td> <td>7</td> <td>8</td> <td>9</td> <td>10</td> </tr> <tr><td>6 B</td><td>0.000000</td><td></td><td></td><td></td><td></td></tr> <tr><td>7 Ru</td><td>3.364555</td><td>0.000000</td><td></td><td></td><td></td></tr> <tr><td>8 B</td><td>3.058172</td><td>2.115927</td><td>0.000000</td><td></td><td></td></tr> <tr><td>9 B</td><td>3.210162</td><td>2.264477</td><td>3.058172</td><td>0.000000</td><td></td></tr> <tr><td>10 B</td><td>3.287536</td><td>2.308940</td><td>1.776344</td><td>1.754992</td><td>0.000000</td></tr> <tr><td>11 B</td><td>2.723200</td><td>3.364555</td><td>3.058172</td><td>1.699800</td><td>1.754992</td></tr> <tr><td>12 B</td><td>1.754992</td><td>2.308940</td><td>1.776344</td><td>3.287536</td><td>2.837800</td></tr> <tr> <td></td> <td>11</td> <td>12</td> <td></td> <td></td> <td></td> </tr> <tr><td>11 B</td><td>0.000000</td><td></td><td></td><td></td><td></td></tr> <tr><td>12 B</td><td>3.287536</td><td>0.000000</td><td></td><td></td><td></td></tr> </tbody> </table>   |          | 1        | 2        | 3        | 4 | 5 | 1 B | 0.000000 |  |  |  |  | 2 Ru | 4.175444 | 0.000000 |  |  |  | 3 B | 1.749686 | 3.364600 | 0.000000 |  |  | 4 B | 1.894009 | 3.168589 | 1.926932 | 0.000000 |  | 5 B | 3.630200 | 2.051710 | 3.038423 | 1.894009 | 0.000000 | 6 B  | 3.038440 | 2.264477 | 1.699800 | 1.926987 | 1.749716 | 7 Ru | 2.051710 | 3.643000 | 2.264545 | 3.168589 | 4.175444 | 8 B | 3.616832 | 2.115927 | 3.058257 | 3.669400 | 3.616832 | 9 B | 1.749716 | 3.364555 | 2.723200 | 1.926987 | 3.038440 | 10 B | 3.090345 | 2.308940 | 3.287583 | 2.962586 | 3.090345 | 11 B | 3.038440 | 2.264477 | 3.210162 | 1.926987 | 1.749716 | 12 B  | 3.090345 | 2.308940 | 1.755079 | 2.962586 | 3.090345 |  | 6 | 7 | 8 | 9 | 10 | 6 B  | 0.000000 |  |  |  |  | 7 Ru | 3.364555 | 0.000000 |  |  |  | 8 B | 3.058172 | 2.115927 | 0.000000 |  |  | 9 B | 3.210162 | 2.264477 | 3.058172 | 0.000000 |  | 10 B | 3.287536 | 2.308940 | 1.776344 | 1.754992 | 0.000000 | 11 B | 2.723200 | 3.364555 | 3.058172 | 1.699800 | 1.754992 | 12 B  | 1.754992 | 2.308940 | 1.776344 | 3.287536 | 2.837800 |  | 11 | 12 |  |  |  | 11 B | 0.000000 |  |  |  |  | 12 B  | 3.287536 | 0.000000 |  |  |  |
|                                                                                                                                 | 1                                                                                                                                                                                                                                                                                                                                                                                                                                                                                                                                                                                                                                                                                                                                                                                                                                                                                                                                                                                                                                                                                                                                                                                                                                                                                                                                                                                                                                                                                                                                                                                                                                                                                                                                                                                                                                                                                                                                                                                                                                                                                                                                                                                                                                                                                                                                                                                                                             | 2        | 3        | 4        | 5        |   |   |     |          |  |  |  |  |      |          |          |  |  |  |     |          |          |          |  |  |     |          |          |          |          |  |     |          |          |          |          |          |      |          |          |          |          |          |      |          |          |          |          |          |     |          |          |          |          |          |     |          |          |          |          |          |      |          |          |          |          |          |      |          |          |          |          |          |       |          |          |          |          |          |  |   |   |   |   |    |      |          |  |  |  |  |      |          |          |  |  |  |     |          |          |          |  |  |     |          |          |          |          |  |      |          |          |          |          |          |      |          |          |          |          |          |       |          |          |          |          |          |  |    |    |  |  |  |      |          |  |  |  |  |       |          |          |  |  |  |
| 1 B                                                                                                                             | 0.000000                                                                                                                                                                                                                                                                                                                                                                                                                                                                                                                                                                                                                                                                                                                                                                                                                                                                                                                                                                                                                                                                                                                                                                                                                                                                                                                                                                                                                                                                                                                                                                                                                                                                                                                                                                                                                                                                                                                                                                                                                                                                                                                                                                                                                                                                                                                                                                                                                      |          |          |          |          |   |   |     |          |  |  |  |  |      |          |          |  |  |  |     |          |          |          |  |  |     |          |          |          |          |  |     |          |          |          |          |          |      |          |          |          |          |          |      |          |          |          |          |          |     |          |          |          |          |          |     |          |          |          |          |          |      |          |          |          |          |          |      |          |          |          |          |          |       |          |          |          |          |          |  |   |   |   |   |    |      |          |  |  |  |  |      |          |          |  |  |  |     |          |          |          |  |  |     |          |          |          |          |  |      |          |          |          |          |          |      |          |          |          |          |          |       |          |          |          |          |          |  |    |    |  |  |  |      |          |  |  |  |  |       |          |          |  |  |  |
| 2 Ru                                                                                                                            | 4.175444                                                                                                                                                                                                                                                                                                                                                                                                                                                                                                                                                                                                                                                                                                                                                                                                                                                                                                                                                                                                                                                                                                                                                                                                                                                                                                                                                                                                                                                                                                                                                                                                                                                                                                                                                                                                                                                                                                                                                                                                                                                                                                                                                                                                                                                                                                                                                                                                                      | 0.000000 |          |          |          |   |   |     |          |  |  |  |  |      |          |          |  |  |  |     |          |          |          |  |  |     |          |          |          |          |  |     |          |          |          |          |          |      |          |          |          |          |          |      |          |          |          |          |          |     |          |          |          |          |          |     |          |          |          |          |          |      |          |          |          |          |          |      |          |          |          |          |          |       |          |          |          |          |          |  |   |   |   |   |    |      |          |  |  |  |  |      |          |          |  |  |  |     |          |          |          |  |  |     |          |          |          |          |  |      |          |          |          |          |          |      |          |          |          |          |          |       |          |          |          |          |          |  |    |    |  |  |  |      |          |  |  |  |  |       |          |          |  |  |  |
| 3 B                                                                                                                             | 1.749686                                                                                                                                                                                                                                                                                                                                                                                                                                                                                                                                                                                                                                                                                                                                                                                                                                                                                                                                                                                                                                                                                                                                                                                                                                                                                                                                                                                                                                                                                                                                                                                                                                                                                                                                                                                                                                                                                                                                                                                                                                                                                                                                                                                                                                                                                                                                                                                                                      | 3.364600 | 0.000000 |          |          |   |   |     |          |  |  |  |  |      |          |          |  |  |  |     |          |          |          |  |  |     |          |          |          |          |  |     |          |          |          |          |          |      |          |          |          |          |          |      |          |          |          |          |          |     |          |          |          |          |          |     |          |          |          |          |          |      |          |          |          |          |          |      |          |          |          |          |          |       |          |          |          |          |          |  |   |   |   |   |    |      |          |  |  |  |  |      |          |          |  |  |  |     |          |          |          |  |  |     |          |          |          |          |  |      |          |          |          |          |          |      |          |          |          |          |          |       |          |          |          |          |          |  |    |    |  |  |  |      |          |  |  |  |  |       |          |          |  |  |  |
| 4 B                                                                                                                             | 1.894009                                                                                                                                                                                                                                                                                                                                                                                                                                                                                                                                                                                                                                                                                                                                                                                                                                                                                                                                                                                                                                                                                                                                                                                                                                                                                                                                                                                                                                                                                                                                                                                                                                                                                                                                                                                                                                                                                                                                                                                                                                                                                                                                                                                                                                                                                                                                                                                                                      | 3.168589 | 1.926932 | 0.000000 |          |   |   |     |          |  |  |  |  |      |          |          |  |  |  |     |          |          |          |  |  |     |          |          |          |          |  |     |          |          |          |          |          |      |          |          |          |          |          |      |          |          |          |          |          |     |          |          |          |          |          |     |          |          |          |          |          |      |          |          |          |          |          |      |          |          |          |          |          |       |          |          |          |          |          |  |   |   |   |   |    |      |          |  |  |  |  |      |          |          |  |  |  |     |          |          |          |  |  |     |          |          |          |          |  |      |          |          |          |          |          |      |          |          |          |          |          |       |          |          |          |          |          |  |    |    |  |  |  |      |          |  |  |  |  |       |          |          |  |  |  |
| 5 B                                                                                                                             | 3.630200                                                                                                                                                                                                                                                                                                                                                                                                                                                                                                                                                                                                                                                                                                                                                                                                                                                                                                                                                                                                                                                                                                                                                                                                                                                                                                                                                                                                                                                                                                                                                                                                                                                                                                                                                                                                                                                                                                                                                                                                                                                                                                                                                                                                                                                                                                                                                                                                                      | 2.051710 | 3.038423 | 1.894009 | 0.000000 |   |   |     |          |  |  |  |  |      |          |          |  |  |  |     |          |          |          |  |  |     |          |          |          |          |  |     |          |          |          |          |          |      |          |          |          |          |          |      |          |          |          |          |          |     |          |          |          |          |          |     |          |          |          |          |          |      |          |          |          |          |          |      |          |          |          |          |          |       |          |          |          |          |          |  |   |   |   |   |    |      |          |  |  |  |  |      |          |          |  |  |  |     |          |          |          |  |  |     |          |          |          |          |  |      |          |          |          |          |          |      |          |          |          |          |          |       |          |          |          |          |          |  |    |    |  |  |  |      |          |  |  |  |  |       |          |          |  |  |  |
| 6 B                                                                                                                             | 3.038440                                                                                                                                                                                                                                                                                                                                                                                                                                                                                                                                                                                                                                                                                                                                                                                                                                                                                                                                                                                                                                                                                                                                                                                                                                                                                                                                                                                                                                                                                                                                                                                                                                                                                                                                                                                                                                                                                                                                                                                                                                                                                                                                                                                                                                                                                                                                                                                                                      | 2.264477 | 1.699800 | 1.926987 | 1.749716 |   |   |     |          |  |  |  |  |      |          |          |  |  |  |     |          |          |          |  |  |     |          |          |          |          |  |     |          |          |          |          |          |      |          |          |          |          |          |      |          |          |          |          |          |     |          |          |          |          |          |     |          |          |          |          |          |      |          |          |          |          |          |      |          |          |          |          |          |       |          |          |          |          |          |  |   |   |   |   |    |      |          |  |  |  |  |      |          |          |  |  |  |     |          |          |          |  |  |     |          |          |          |          |  |      |          |          |          |          |          |      |          |          |          |          |          |       |          |          |          |          |          |  |    |    |  |  |  |      |          |  |  |  |  |       |          |          |  |  |  |
| 7 Ru                                                                                                                            | 2.051710                                                                                                                                                                                                                                                                                                                                                                                                                                                                                                                                                                                                                                                                                                                                                                                                                                                                                                                                                                                                                                                                                                                                                                                                                                                                                                                                                                                                                                                                                                                                                                                                                                                                                                                                                                                                                                                                                                                                                                                                                                                                                                                                                                                                                                                                                                                                                                                                                      | 3.643000 | 2.264545 | 3.168589 | 4.175444 |   |   |     |          |  |  |  |  |      |          |          |  |  |  |     |          |          |          |  |  |     |          |          |          |          |  |     |          |          |          |          |          |      |          |          |          |          |          |      |          |          |          |          |          |     |          |          |          |          |          |     |          |          |          |          |          |      |          |          |          |          |          |      |          |          |          |          |          |       |          |          |          |          |          |  |   |   |   |   |    |      |          |  |  |  |  |      |          |          |  |  |  |     |          |          |          |  |  |     |          |          |          |          |  |      |          |          |          |          |          |      |          |          |          |          |          |       |          |          |          |          |          |  |    |    |  |  |  |      |          |  |  |  |  |       |          |          |  |  |  |
| 8 B                                                                                                                             | 3.616832                                                                                                                                                                                                                                                                                                                                                                                                                                                                                                                                                                                                                                                                                                                                                                                                                                                                                                                                                                                                                                                                                                                                                                                                                                                                                                                                                                                                                                                                                                                                                                                                                                                                                                                                                                                                                                                                                                                                                                                                                                                                                                                                                                                                                                                                                                                                                                                                                      | 2.115927 | 3.058257 | 3.669400 | 3.616832 |   |   |     |          |  |  |  |  |      |          |          |  |  |  |     |          |          |          |  |  |     |          |          |          |          |  |     |          |          |          |          |          |      |          |          |          |          |          |      |          |          |          |          |          |     |          |          |          |          |          |     |          |          |          |          |          |      |          |          |          |          |          |      |          |          |          |          |          |       |          |          |          |          |          |  |   |   |   |   |    |      |          |  |  |  |  |      |          |          |  |  |  |     |          |          |          |  |  |     |          |          |          |          |  |      |          |          |          |          |          |      |          |          |          |          |          |       |          |          |          |          |          |  |    |    |  |  |  |      |          |  |  |  |  |       |          |          |  |  |  |
| 9 B                                                                                                                             | 1.749716                                                                                                                                                                                                                                                                                                                                                                                                                                                                                                                                                                                                                                                                                                                                                                                                                                                                                                                                                                                                                                                                                                                                                                                                                                                                                                                                                                                                                                                                                                                                                                                                                                                                                                                                                                                                                                                                                                                                                                                                                                                                                                                                                                                                                                                                                                                                                                                                                      | 3.364555 | 2.723200 | 1.926987 | 3.038440 |   |   |     |          |  |  |  |  |      |          |          |  |  |  |     |          |          |          |  |  |     |          |          |          |          |  |     |          |          |          |          |          |      |          |          |          |          |          |      |          |          |          |          |          |     |          |          |          |          |          |     |          |          |          |          |          |      |          |          |          |          |          |      |          |          |          |          |          |       |          |          |          |          |          |  |   |   |   |   |    |      |          |  |  |  |  |      |          |          |  |  |  |     |          |          |          |  |  |     |          |          |          |          |  |      |          |          |          |          |          |      |          |          |          |          |          |       |          |          |          |          |          |  |    |    |  |  |  |      |          |  |  |  |  |       |          |          |  |  |  |
| 10 B                                                                                                                            | 3.090345                                                                                                                                                                                                                                                                                                                                                                                                                                                                                                                                                                                                                                                                                                                                                                                                                                                                                                                                                                                                                                                                                                                                                                                                                                                                                                                                                                                                                                                                                                                                                                                                                                                                                                                                                                                                                                                                                                                                                                                                                                                                                                                                                                                                                                                                                                                                                                                                                      | 2.308940 | 3.287583 | 2.962586 | 3.090345 |   |   |     |          |  |  |  |  |      |          |          |  |  |  |     |          |          |          |  |  |     |          |          |          |          |  |     |          |          |          |          |          |      |          |          |          |          |          |      |          |          |          |          |          |     |          |          |          |          |          |     |          |          |          |          |          |      |          |          |          |          |          |      |          |          |          |          |          |       |          |          |          |          |          |  |   |   |   |   |    |      |          |  |  |  |  |      |          |          |  |  |  |     |          |          |          |  |  |     |          |          |          |          |  |      |          |          |          |          |          |      |          |          |          |          |          |       |          |          |          |          |          |  |    |    |  |  |  |      |          |  |  |  |  |       |          |          |  |  |  |
| 11 B                                                                                                                            | 3.038440                                                                                                                                                                                                                                                                                                                                                                                                                                                                                                                                                                                                                                                                                                                                                                                                                                                                                                                                                                                                                                                                                                                                                                                                                                                                                                                                                                                                                                                                                                                                                                                                                                                                                                                                                                                                                                                                                                                                                                                                                                                                                                                                                                                                                                                                                                                                                                                                                      | 2.264477 | 3.210162 | 1.926987 | 1.749716 |   |   |     |          |  |  |  |  |      |          |          |  |  |  |     |          |          |          |  |  |     |          |          |          |          |  |     |          |          |          |          |          |      |          |          |          |          |          |      |          |          |          |          |          |     |          |          |          |          |          |     |          |          |          |          |          |      |          |          |          |          |          |      |          |          |          |          |          |       |          |          |          |          |          |  |   |   |   |   |    |      |          |  |  |  |  |      |          |          |  |  |  |     |          |          |          |  |  |     |          |          |          |          |  |      |          |          |          |          |          |      |          |          |          |          |          |       |          |          |          |          |          |  |    |    |  |  |  |      |          |  |  |  |  |       |          |          |  |  |  |
| 12 B                                                                                                                            | 3.090345                                                                                                                                                                                                                                                                                                                                                                                                                                                                                                                                                                                                                                                                                                                                                                                                                                                                                                                                                                                                                                                                                                                                                                                                                                                                                                                                                                                                                                                                                                                                                                                                                                                                                                                                                                                                                                                                                                                                                                                                                                                                                                                                                                                                                                                                                                                                                                                                                      | 2.308940 | 1.755079 | 2.962586 | 3.090345 |   |   |     |          |  |  |  |  |      |          |          |  |  |  |     |          |          |          |  |  |     |          |          |          |          |  |     |          |          |          |          |          |      |          |          |          |          |          |      |          |          |          |          |          |     |          |          |          |          |          |     |          |          |          |          |          |      |          |          |          |          |          |      |          |          |          |          |          |       |          |          |          |          |          |  |   |   |   |   |    |      |          |  |  |  |  |      |          |          |  |  |  |     |          |          |          |  |  |     |          |          |          |          |  |      |          |          |          |          |          |      |          |          |          |          |          |       |          |          |          |          |          |  |    |    |  |  |  |      |          |  |  |  |  |       |          |          |  |  |  |
|                                                                                                                                 | 6                                                                                                                                                                                                                                                                                                                                                                                                                                                                                                                                                                                                                                                                                                                                                                                                                                                                                                                                                                                                                                                                                                                                                                                                                                                                                                                                                                                                                                                                                                                                                                                                                                                                                                                                                                                                                                                                                                                                                                                                                                                                                                                                                                                                                                                                                                                                                                                                                             | 7        | 8        | 9        | 10       |   |   |     |          |  |  |  |  |      |          |          |  |  |  |     |          |          |          |  |  |     |          |          |          |          |  |     |          |          |          |          |          |      |          |          |          |          |          |      |          |          |          |          |          |     |          |          |          |          |          |     |          |          |          |          |          |      |          |          |          |          |          |      |          |          |          |          |          |       |          |          |          |          |          |  |   |   |   |   |    |      |          |  |  |  |  |      |          |          |  |  |  |     |          |          |          |  |  |     |          |          |          |          |  |      |          |          |          |          |          |      |          |          |          |          |          |       |          |          |          |          |          |  |    |    |  |  |  |      |          |  |  |  |  |       |          |          |  |  |  |
| 6 B                                                                                                                             | 0.000000                                                                                                                                                                                                                                                                                                                                                                                                                                                                                                                                                                                                                                                                                                                                                                                                                                                                                                                                                                                                                                                                                                                                                                                                                                                                                                                                                                                                                                                                                                                                                                                                                                                                                                                                                                                                                                                                                                                                                                                                                                                                                                                                                                                                                                                                                                                                                                                                                      |          |          |          |          |   |   |     |          |  |  |  |  |      |          |          |  |  |  |     |          |          |          |  |  |     |          |          |          |          |  |     |          |          |          |          |          |      |          |          |          |          |          |      |          |          |          |          |          |     |          |          |          |          |          |     |          |          |          |          |          |      |          |          |          |          |          |      |          |          |          |          |          |       |          |          |          |          |          |  |   |   |   |   |    |      |          |  |  |  |  |      |          |          |  |  |  |     |          |          |          |  |  |     |          |          |          |          |  |      |          |          |          |          |          |      |          |          |          |          |          |       |          |          |          |          |          |  |    |    |  |  |  |      |          |  |  |  |  |       |          |          |  |  |  |
| 7 Ru                                                                                                                            | 3.364555                                                                                                                                                                                                                                                                                                                                                                                                                                                                                                                                                                                                                                                                                                                                                                                                                                                                                                                                                                                                                                                                                                                                                                                                                                                                                                                                                                                                                                                                                                                                                                                                                                                                                                                                                                                                                                                                                                                                                                                                                                                                                                                                                                                                                                                                                                                                                                                                                      | 0.000000 |          |          |          |   |   |     |          |  |  |  |  |      |          |          |  |  |  |     |          |          |          |  |  |     |          |          |          |          |  |     |          |          |          |          |          |      |          |          |          |          |          |      |          |          |          |          |          |     |          |          |          |          |          |     |          |          |          |          |          |      |          |          |          |          |          |      |          |          |          |          |          |       |          |          |          |          |          |  |   |   |   |   |    |      |          |  |  |  |  |      |          |          |  |  |  |     |          |          |          |  |  |     |          |          |          |          |  |      |          |          |          |          |          |      |          |          |          |          |          |       |          |          |          |          |          |  |    |    |  |  |  |      |          |  |  |  |  |       |          |          |  |  |  |
| 8 B                                                                                                                             | 3.058172                                                                                                                                                                                                                                                                                                                                                                                                                                                                                                                                                                                                                                                                                                                                                                                                                                                                                                                                                                                                                                                                                                                                                                                                                                                                                                                                                                                                                                                                                                                                                                                                                                                                                                                                                                                                                                                                                                                                                                                                                                                                                                                                                                                                                                                                                                                                                                                                                      | 2.115927 | 0.000000 |          |          |   |   |     |          |  |  |  |  |      |          |          |  |  |  |     |          |          |          |  |  |     |          |          |          |          |  |     |          |          |          |          |          |      |          |          |          |          |          |      |          |          |          |          |          |     |          |          |          |          |          |     |          |          |          |          |          |      |          |          |          |          |          |      |          |          |          |          |          |       |          |          |          |          |          |  |   |   |   |   |    |      |          |  |  |  |  |      |          |          |  |  |  |     |          |          |          |  |  |     |          |          |          |          |  |      |          |          |          |          |          |      |          |          |          |          |          |       |          |          |          |          |          |  |    |    |  |  |  |      |          |  |  |  |  |       |          |          |  |  |  |
| 9 B                                                                                                                             | 3.210162                                                                                                                                                                                                                                                                                                                                                                                                                                                                                                                                                                                                                                                                                                                                                                                                                                                                                                                                                                                                                                                                                                                                                                                                                                                                                                                                                                                                                                                                                                                                                                                                                                                                                                                                                                                                                                                                                                                                                                                                                                                                                                                                                                                                                                                                                                                                                                                                                      | 2.264477 | 3.058172 | 0.000000 |          |   |   |     |          |  |  |  |  |      |          |          |  |  |  |     |          |          |          |  |  |     |          |          |          |          |  |     |          |          |          |          |          |      |          |          |          |          |          |      |          |          |          |          |          |     |          |          |          |          |          |     |          |          |          |          |          |      |          |          |          |          |          |      |          |          |          |          |          |       |          |          |          |          |          |  |   |   |   |   |    |      |          |  |  |  |  |      |          |          |  |  |  |     |          |          |          |  |  |     |          |          |          |          |  |      |          |          |          |          |          |      |          |          |          |          |          |       |          |          |          |          |          |  |    |    |  |  |  |      |          |  |  |  |  |       |          |          |  |  |  |
| 10 B                                                                                                                            | 3.287536                                                                                                                                                                                                                                                                                                                                                                                                                                                                                                                                                                                                                                                                                                                                                                                                                                                                                                                                                                                                                                                                                                                                                                                                                                                                                                                                                                                                                                                                                                                                                                                                                                                                                                                                                                                                                                                                                                                                                                                                                                                                                                                                                                                                                                                                                                                                                                                                                      | 2.308940 | 1.776344 | 1.754992 | 0.000000 |   |   |     |          |  |  |  |  |      |          |          |  |  |  |     |          |          |          |  |  |     |          |          |          |          |  |     |          |          |          |          |          |      |          |          |          |          |          |      |          |          |          |          |          |     |          |          |          |          |          |     |          |          |          |          |          |      |          |          |          |          |          |      |          |          |          |          |          |       |          |          |          |          |          |  |   |   |   |   |    |      |          |  |  |  |  |      |          |          |  |  |  |     |          |          |          |  |  |     |          |          |          |          |  |      |          |          |          |          |          |      |          |          |          |          |          |       |          |          |          |          |          |  |    |    |  |  |  |      |          |  |  |  |  |       |          |          |  |  |  |
| 11 B                                                                                                                            | 2.723200                                                                                                                                                                                                                                                                                                                                                                                                                                                                                                                                                                                                                                                                                                                                                                                                                                                                                                                                                                                                                                                                                                                                                                                                                                                                                                                                                                                                                                                                                                                                                                                                                                                                                                                                                                                                                                                                                                                                                                                                                                                                                                                                                                                                                                                                                                                                                                                                                      | 3.364555 | 3.058172 | 1.699800 | 1.754992 |   |   |     |          |  |  |  |  |      |          |          |  |  |  |     |          |          |          |  |  |     |          |          |          |          |  |     |          |          |          |          |          |      |          |          |          |          |          |      |          |          |          |          |          |     |          |          |          |          |          |     |          |          |          |          |          |      |          |          |          |          |          |      |          |          |          |          |          |       |          |          |          |          |          |  |   |   |   |   |    |      |          |  |  |  |  |      |          |          |  |  |  |     |          |          |          |  |  |     |          |          |          |          |  |      |          |          |          |          |          |      |          |          |          |          |          |       |          |          |          |          |          |  |    |    |  |  |  |      |          |  |  |  |  |       |          |          |  |  |  |
| 12 B                                                                                                                            | 1.754992                                                                                                                                                                                                                                                                                                                                                                                                                                                                                                                                                                                                                                                                                                                                                                                                                                                                                                                                                                                                                                                                                                                                                                                                                                                                                                                                                                                                                                                                                                                                                                                                                                                                                                                                                                                                                                                                                                                                                                                                                                                                                                                                                                                                                                                                                                                                                                                                                      | 2.308940 | 1.776344 | 3.287536 | 2.837800 |   |   |     |          |  |  |  |  |      |          |          |  |  |  |     |          |          |          |  |  |     |          |          |          |          |  |     |          |          |          |          |          |      |          |          |          |          |          |      |          |          |          |          |          |     |          |          |          |          |          |     |          |          |          |          |          |      |          |          |          |          |          |      |          |          |          |          |          |       |          |          |          |          |          |  |   |   |   |   |    |      |          |  |  |  |  |      |          |          |  |  |  |     |          |          |          |  |  |     |          |          |          |          |  |      |          |          |          |          |          |      |          |          |          |          |          |       |          |          |          |          |          |  |    |    |  |  |  |      |          |  |  |  |  |       |          |          |  |  |  |
|                                                                                                                                 | 11                                                                                                                                                                                                                                                                                                                                                                                                                                                                                                                                                                                                                                                                                                                                                                                                                                                                                                                                                                                                                                                                                                                                                                                                                                                                                                                                                                                                                                                                                                                                                                                                                                                                                                                                                                                                                                                                                                                                                                                                                                                                                                                                                                                                                                                                                                                                                                                                                            | 12       |          |          |          |   |   |     |          |  |  |  |  |      |          |          |  |  |  |     |          |          |          |  |  |     |          |          |          |          |  |     |          |          |          |          |          |      |          |          |          |          |          |      |          |          |          |          |          |     |          |          |          |          |          |     |          |          |          |          |          |      |          |          |          |          |          |      |          |          |          |          |          |       |          |          |          |          |          |  |   |   |   |   |    |      |          |  |  |  |  |      |          |          |  |  |  |     |          |          |          |  |  |     |          |          |          |          |  |      |          |          |          |          |          |      |          |          |          |          |          |       |          |          |          |          |          |  |    |    |  |  |  |      |          |  |  |  |  |       |          |          |  |  |  |
| 11 B                                                                                                                            | 0.000000                                                                                                                                                                                                                                                                                                                                                                                                                                                                                                                                                                                                                                                                                                                                                                                                                                                                                                                                                                                                                                                                                                                                                                                                                                                                                                                                                                                                                                                                                                                                                                                                                                                                                                                                                                                                                                                                                                                                                                                                                                                                                                                                                                                                                                                                                                                                                                                                                      |          |          |          |          |   |   |     |          |  |  |  |  |      |          |          |  |  |  |     |          |          |          |  |  |     |          |          |          |          |  |     |          |          |          |          |          |      |          |          |          |          |          |      |          |          |          |          |          |     |          |          |          |          |          |     |          |          |          |          |          |      |          |          |          |          |          |      |          |          |          |          |          |       |          |          |          |          |          |  |   |   |   |   |    |      |          |  |  |  |  |      |          |          |  |  |  |     |          |          |          |  |  |     |          |          |          |          |  |      |          |          |          |          |          |      |          |          |          |          |          |       |          |          |          |          |          |  |    |    |  |  |  |      |          |  |  |  |  |       |          |          |  |  |  |
| 12 B                                                                                                                            | 3.287536                                                                                                                                                                                                                                                                                                                                                                                                                                                                                                                                                                                                                                                                                                                                                                                                                                                                                                                                                                                                                                                                                                                                                                                                                                                                                                                                                                                                                                                                                                                                                                                                                                                                                                                                                                                                                                                                                                                                                                                                                                                                                                                                                                                                                                                                                                                                                                                                                      | 0.000000 |          |          |          |   |   |     |          |  |  |  |  |      |          |          |  |  |  |     |          |          |          |  |  |     |          |          |          |          |  |     |          |          |          |          |          |      |          |          |          |          |          |      |          |          |          |          |          |     |          |          |          |          |          |     |          |          |          |          |          |      |          |          |          |          |          |      |          |          |          |          |          |       |          |          |          |          |          |  |   |   |   |   |    |      |          |  |  |  |  |      |          |          |  |  |  |     |          |          |          |  |  |     |          |          |          |          |  |      |          |          |          |          |          |      |          |          |          |          |          |       |          |          |          |          |          |  |    |    |  |  |  |      |          |  |  |  |  |       |          |          |  |  |  |

| 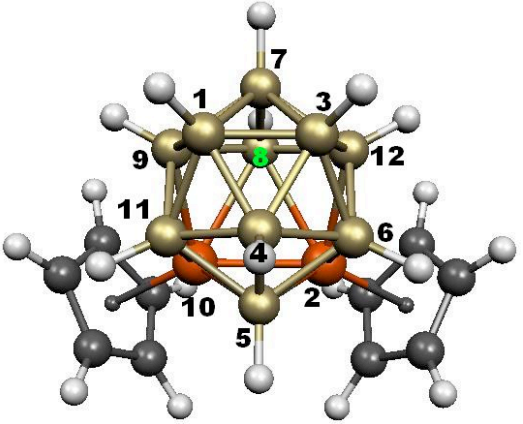 <p>5. -831.61266881 +19.7 C<sub>2v</sub></p> | <table border="1"> <thead> <tr> <th></th> <th>1</th> <th>2</th> <th>3</th> <th>4</th> <th>5</th> </tr> </thead> <tbody> <tr><td>1 B</td><td>0.000000</td><td></td><td></td><td></td><td></td></tr> <tr><td>2 Ru</td><td>3.959666</td><td>0.000000</td><td></td><td></td><td></td></tr> <tr><td>3 B</td><td>1.746000</td><td>3.427181</td><td>0.000000</td><td></td><td></td></tr> <tr><td>4 B</td><td>1.789597</td><td>3.425836</td><td>1.789597</td><td>0.000000</td><td></td></tr> <tr><td>5 B</td><td>2.929358</td><td>2.304141</td><td>2.929358</td><td>1.736085</td><td>0.000000</td></tr> <tr><td>6 B</td><td>2.893937</td><td>2.217942</td><td>1.792970</td><td>1.813953</td><td>1.852056</td></tr> <tr><td>7 B</td><td>1.789597</td><td>3.425836</td><td>1.789597</td><td>2.935800</td><td>3.559307</td></tr> <tr><td>8 B</td><td>2.929358</td><td>2.304141</td><td>2.929358</td><td>3.559307</td><td>3.288600</td></tr> <tr><td>9 B</td><td>1.792970</td><td>3.402528</td><td>2.893937</td><td>2.934397</td><td>3.064264</td></tr> <tr><td>10 Ru</td><td>3.427181</td><td>2.252800</td><td>3.959666</td><td>3.425836</td><td>2.304141</td></tr> <tr><td>11 B</td><td>1.792970</td><td>3.402528</td><td>2.893937</td><td>1.813953</td><td>1.852056</td></tr> <tr><td>12 B</td><td>2.893937</td><td>2.217942</td><td>1.792970</td><td>2.934397</td><td>3.064264</td></tr> <tr> <th></th> <th>6</th> <th>7</th> <th>8</th> <th>9</th> <th>10</th> </tr> <tr><td>6 B</td><td>0.000000</td><td></td><td></td><td></td><td></td></tr> <tr><td>7 B</td><td>2.934397</td><td>0.000000</td><td></td><td></td><td></td></tr> <tr><td>8 B</td><td>3.064264</td><td>1.736085</td><td>0.000000</td><td></td><td></td></tr> <tr><td>9 B</td><td>3.466765</td><td>1.813953</td><td>1.852056</td><td>0.000000</td><td></td></tr> <tr><td>10 Ru</td><td>3.402528</td><td>3.425836</td><td>2.304141</td><td>2.217942</td><td>0.000000</td></tr> <tr><td>11 B</td><td>2.955400</td><td>2.934397</td><td>3.064264</td><td>1.812200</td><td>2.217942</td></tr> <tr><td>12 B</td><td>1.812200</td><td>1.813953</td><td>1.852056</td><td>2.955400</td><td>3.402528</td></tr> <tr> <th></th> <th>11</th> <th>12</th> <th colspan="3"></th> </tr> <tr><td>11 B</td><td>0.000000</td><td></td><td colspan="3"></td></tr> <tr><td>12 B</td><td>3.466765</td><td>0.000000</td><td colspan="3"></td></tr> </tbody> </table>    |          | 1        | 2        | 3        | 4 | 5 | 1 B | 0.000000 |  |  |  |  | 2 Ru | 3.959666 | 0.000000 |  |  |  | 3 B | 1.746000 | 3.427181 | 0.000000 |  |  | 4 B | 1.789597 | 3.425836 | 1.789597 | 0.000000 |  | 5 B | 2.929358 | 2.304141 | 2.929358 | 1.736085 | 0.000000 | 6 B | 2.893937 | 2.217942 | 1.792970 | 1.813953 | 1.852056 | 7 B | 1.789597 | 3.425836 | 1.789597 | 2.935800 | 3.559307 | 8 B | 2.929358 | 2.304141 | 2.929358 | 3.559307 | 3.288600 | 9 B | 1.792970 | 3.402528 | 2.893937 | 2.934397 | 3.064264 | 10 Ru | 3.427181 | 2.252800 | 3.959666 | 3.425836 | 2.304141 | 11 B  | 1.792970 | 3.402528 | 2.893937 | 1.813953 | 1.852056 | 12 B  | 2.893937 | 2.217942 | 1.792970 | 2.934397 | 3.064264 |  | 6 | 7 | 8 | 9 | 10 | 6 B | 0.000000 |  |  |  |  | 7 B | 2.934397 | 0.000000 |  |  |  | 8 B | 3.064264 | 1.736085 | 0.000000 |  |  | 9 B | 3.466765 | 1.813953 | 1.852056 | 0.000000 |  | 10 Ru | 3.402528 | 3.425836 | 2.304141 | 2.217942 | 0.000000 | 11 B  | 2.955400 | 2.934397 | 3.064264 | 1.812200 | 2.217942 | 12 B  | 1.812200 | 1.813953 | 1.852056 | 2.955400 | 3.402528 |  | 11 | 12 |  |  |  | 11 B  | 0.000000 |  |  |  |  | 12 B  | 3.466765 | 0.000000 |  |  |  |
|--------------------------------------------------------------------------------------------------------------------------------|------------------------------------------------------------------------------------------------------------------------------------------------------------------------------------------------------------------------------------------------------------------------------------------------------------------------------------------------------------------------------------------------------------------------------------------------------------------------------------------------------------------------------------------------------------------------------------------------------------------------------------------------------------------------------------------------------------------------------------------------------------------------------------------------------------------------------------------------------------------------------------------------------------------------------------------------------------------------------------------------------------------------------------------------------------------------------------------------------------------------------------------------------------------------------------------------------------------------------------------------------------------------------------------------------------------------------------------------------------------------------------------------------------------------------------------------------------------------------------------------------------------------------------------------------------------------------------------------------------------------------------------------------------------------------------------------------------------------------------------------------------------------------------------------------------------------------------------------------------------------------------------------------------------------------------------------------------------------------------------------------------------------------------------------------------------------------------------------------------------------------------------------------------------------------------------------------------------------------------------------------------------------------------------------------------------------------------------------------------------------------------------------------------|----------|----------|----------|----------|---|---|-----|----------|--|--|--|--|------|----------|----------|--|--|--|-----|----------|----------|----------|--|--|-----|----------|----------|----------|----------|--|-----|----------|----------|----------|----------|----------|-----|----------|----------|----------|----------|----------|-----|----------|----------|----------|----------|----------|-----|----------|----------|----------|----------|----------|-----|----------|----------|----------|----------|----------|-------|----------|----------|----------|----------|----------|-------|----------|----------|----------|----------|----------|-------|----------|----------|----------|----------|----------|--|---|---|---|---|----|-----|----------|--|--|--|--|-----|----------|----------|--|--|--|-----|----------|----------|----------|--|--|-----|----------|----------|----------|----------|--|-------|----------|----------|----------|----------|----------|-------|----------|----------|----------|----------|----------|-------|----------|----------|----------|----------|----------|--|----|----|--|--|--|-------|----------|--|--|--|--|-------|----------|----------|--|--|--|
|                                                                                                                                | 1                                                                                                                                                                                                                                                                                                                                                                                                                                                                                                                                                                                                                                                                                                                                                                                                                                                                                                                                                                                                                                                                                                                                                                                                                                                                                                                                                                                                                                                                                                                                                                                                                                                                                                                                                                                                                                                                                                                                                                                                                                                                                                                                                                                                                                                                                                                                                                                                          | 2        | 3        | 4        | 5        |   |   |     |          |  |  |  |  |      |          |          |  |  |  |     |          |          |          |  |  |     |          |          |          |          |  |     |          |          |          |          |          |     |          |          |          |          |          |     |          |          |          |          |          |     |          |          |          |          |          |     |          |          |          |          |          |       |          |          |          |          |          |       |          |          |          |          |          |       |          |          |          |          |          |  |   |   |   |   |    |     |          |  |  |  |  |     |          |          |  |  |  |     |          |          |          |  |  |     |          |          |          |          |  |       |          |          |          |          |          |       |          |          |          |          |          |       |          |          |          |          |          |  |    |    |  |  |  |       |          |  |  |  |  |       |          |          |  |  |  |
| 1 B                                                                                                                            | 0.000000                                                                                                                                                                                                                                                                                                                                                                                                                                                                                                                                                                                                                                                                                                                                                                                                                                                                                                                                                                                                                                                                                                                                                                                                                                                                                                                                                                                                                                                                                                                                                                                                                                                                                                                                                                                                                                                                                                                                                                                                                                                                                                                                                                                                                                                                                                                                                                                                   |          |          |          |          |   |   |     |          |  |  |  |  |      |          |          |  |  |  |     |          |          |          |  |  |     |          |          |          |          |  |     |          |          |          |          |          |     |          |          |          |          |          |     |          |          |          |          |          |     |          |          |          |          |          |     |          |          |          |          |          |       |          |          |          |          |          |       |          |          |          |          |          |       |          |          |          |          |          |  |   |   |   |   |    |     |          |  |  |  |  |     |          |          |  |  |  |     |          |          |          |  |  |     |          |          |          |          |  |       |          |          |          |          |          |       |          |          |          |          |          |       |          |          |          |          |          |  |    |    |  |  |  |       |          |  |  |  |  |       |          |          |  |  |  |
| 2 Ru                                                                                                                           | 3.959666                                                                                                                                                                                                                                                                                                                                                                                                                                                                                                                                                                                                                                                                                                                                                                                                                                                                                                                                                                                                                                                                                                                                                                                                                                                                                                                                                                                                                                                                                                                                                                                                                                                                                                                                                                                                                                                                                                                                                                                                                                                                                                                                                                                                                                                                                                                                                                                                   | 0.000000 |          |          |          |   |   |     |          |  |  |  |  |      |          |          |  |  |  |     |          |          |          |  |  |     |          |          |          |          |  |     |          |          |          |          |          |     |          |          |          |          |          |     |          |          |          |          |          |     |          |          |          |          |          |     |          |          |          |          |          |       |          |          |          |          |          |       |          |          |          |          |          |       |          |          |          |          |          |  |   |   |   |   |    |     |          |  |  |  |  |     |          |          |  |  |  |     |          |          |          |  |  |     |          |          |          |          |  |       |          |          |          |          |          |       |          |          |          |          |          |       |          |          |          |          |          |  |    |    |  |  |  |       |          |  |  |  |  |       |          |          |  |  |  |
| 3 B                                                                                                                            | 1.746000                                                                                                                                                                                                                                                                                                                                                                                                                                                                                                                                                                                                                                                                                                                                                                                                                                                                                                                                                                                                                                                                                                                                                                                                                                                                                                                                                                                                                                                                                                                                                                                                                                                                                                                                                                                                                                                                                                                                                                                                                                                                                                                                                                                                                                                                                                                                                                                                   | 3.427181 | 0.000000 |          |          |   |   |     |          |  |  |  |  |      |          |          |  |  |  |     |          |          |          |  |  |     |          |          |          |          |  |     |          |          |          |          |          |     |          |          |          |          |          |     |          |          |          |          |          |     |          |          |          |          |          |     |          |          |          |          |          |       |          |          |          |          |          |       |          |          |          |          |          |       |          |          |          |          |          |  |   |   |   |   |    |     |          |  |  |  |  |     |          |          |  |  |  |     |          |          |          |  |  |     |          |          |          |          |  |       |          |          |          |          |          |       |          |          |          |          |          |       |          |          |          |          |          |  |    |    |  |  |  |       |          |  |  |  |  |       |          |          |  |  |  |
| 4 B                                                                                                                            | 1.789597                                                                                                                                                                                                                                                                                                                                                                                                                                                                                                                                                                                                                                                                                                                                                                                                                                                                                                                                                                                                                                                                                                                                                                                                                                                                                                                                                                                                                                                                                                                                                                                                                                                                                                                                                                                                                                                                                                                                                                                                                                                                                                                                                                                                                                                                                                                                                                                                   | 3.425836 | 1.789597 | 0.000000 |          |   |   |     |          |  |  |  |  |      |          |          |  |  |  |     |          |          |          |  |  |     |          |          |          |          |  |     |          |          |          |          |          |     |          |          |          |          |          |     |          |          |          |          |          |     |          |          |          |          |          |     |          |          |          |          |          |       |          |          |          |          |          |       |          |          |          |          |          |       |          |          |          |          |          |  |   |   |   |   |    |     |          |  |  |  |  |     |          |          |  |  |  |     |          |          |          |  |  |     |          |          |          |          |  |       |          |          |          |          |          |       |          |          |          |          |          |       |          |          |          |          |          |  |    |    |  |  |  |       |          |  |  |  |  |       |          |          |  |  |  |
| 5 B                                                                                                                            | 2.929358                                                                                                                                                                                                                                                                                                                                                                                                                                                                                                                                                                                                                                                                                                                                                                                                                                                                                                                                                                                                                                                                                                                                                                                                                                                                                                                                                                                                                                                                                                                                                                                                                                                                                                                                                                                                                                                                                                                                                                                                                                                                                                                                                                                                                                                                                                                                                                                                   | 2.304141 | 2.929358 | 1.736085 | 0.000000 |   |   |     |          |  |  |  |  |      |          |          |  |  |  |     |          |          |          |  |  |     |          |          |          |          |  |     |          |          |          |          |          |     |          |          |          |          |          |     |          |          |          |          |          |     |          |          |          |          |          |     |          |          |          |          |          |       |          |          |          |          |          |       |          |          |          |          |          |       |          |          |          |          |          |  |   |   |   |   |    |     |          |  |  |  |  |     |          |          |  |  |  |     |          |          |          |  |  |     |          |          |          |          |  |       |          |          |          |          |          |       |          |          |          |          |          |       |          |          |          |          |          |  |    |    |  |  |  |       |          |  |  |  |  |       |          |          |  |  |  |
| 6 B                                                                                                                            | 2.893937                                                                                                                                                                                                                                                                                                                                                                                                                                                                                                                                                                                                                                                                                                                                                                                                                                                                                                                                                                                                                                                                                                                                                                                                                                                                                                                                                                                                                                                                                                                                                                                                                                                                                                                                                                                                                                                                                                                                                                                                                                                                                                                                                                                                                                                                                                                                                                                                   | 2.217942 | 1.792970 | 1.813953 | 1.852056 |   |   |     |          |  |  |  |  |      |          |          |  |  |  |     |          |          |          |  |  |     |          |          |          |          |  |     |          |          |          |          |          |     |          |          |          |          |          |     |          |          |          |          |          |     |          |          |          |          |          |     |          |          |          |          |          |       |          |          |          |          |          |       |          |          |          |          |          |       |          |          |          |          |          |  |   |   |   |   |    |     |          |  |  |  |  |     |          |          |  |  |  |     |          |          |          |  |  |     |          |          |          |          |  |       |          |          |          |          |          |       |          |          |          |          |          |       |          |          |          |          |          |  |    |    |  |  |  |       |          |  |  |  |  |       |          |          |  |  |  |
| 7 B                                                                                                                            | 1.789597                                                                                                                                                                                                                                                                                                                                                                                                                                                                                                                                                                                                                                                                                                                                                                                                                                                                                                                                                                                                                                                                                                                                                                                                                                                                                                                                                                                                                                                                                                                                                                                                                                                                                                                                                                                                                                                                                                                                                                                                                                                                                                                                                                                                                                                                                                                                                                                                   | 3.425836 | 1.789597 | 2.935800 | 3.559307 |   |   |     |          |  |  |  |  |      |          |          |  |  |  |     |          |          |          |  |  |     |          |          |          |          |  |     |          |          |          |          |          |     |          |          |          |          |          |     |          |          |          |          |          |     |          |          |          |          |          |     |          |          |          |          |          |       |          |          |          |          |          |       |          |          |          |          |          |       |          |          |          |          |          |  |   |   |   |   |    |     |          |  |  |  |  |     |          |          |  |  |  |     |          |          |          |  |  |     |          |          |          |          |  |       |          |          |          |          |          |       |          |          |          |          |          |       |          |          |          |          |          |  |    |    |  |  |  |       |          |  |  |  |  |       |          |          |  |  |  |
| 8 B                                                                                                                            | 2.929358                                                                                                                                                                                                                                                                                                                                                                                                                                                                                                                                                                                                                                                                                                                                                                                                                                                                                                                                                                                                                                                                                                                                                                                                                                                                                                                                                                                                                                                                                                                                                                                                                                                                                                                                                                                                                                                                                                                                                                                                                                                                                                                                                                                                                                                                                                                                                                                                   | 2.304141 | 2.929358 | 3.559307 | 3.288600 |   |   |     |          |  |  |  |  |      |          |          |  |  |  |     |          |          |          |  |  |     |          |          |          |          |  |     |          |          |          |          |          |     |          |          |          |          |          |     |          |          |          |          |          |     |          |          |          |          |          |     |          |          |          |          |          |       |          |          |          |          |          |       |          |          |          |          |          |       |          |          |          |          |          |  |   |   |   |   |    |     |          |  |  |  |  |     |          |          |  |  |  |     |          |          |          |  |  |     |          |          |          |          |  |       |          |          |          |          |          |       |          |          |          |          |          |       |          |          |          |          |          |  |    |    |  |  |  |       |          |  |  |  |  |       |          |          |  |  |  |
| 9 B                                                                                                                            | 1.792970                                                                                                                                                                                                                                                                                                                                                                                                                                                                                                                                                                                                                                                                                                                                                                                                                                                                                                                                                                                                                                                                                                                                                                                                                                                                                                                                                                                                                                                                                                                                                                                                                                                                                                                                                                                                                                                                                                                                                                                                                                                                                                                                                                                                                                                                                                                                                                                                   | 3.402528 | 2.893937 | 2.934397 | 3.064264 |   |   |     |          |  |  |  |  |      |          |          |  |  |  |     |          |          |          |  |  |     |          |          |          |          |  |     |          |          |          |          |          |     |          |          |          |          |          |     |          |          |          |          |          |     |          |          |          |          |          |     |          |          |          |          |          |       |          |          |          |          |          |       |          |          |          |          |          |       |          |          |          |          |          |  |   |   |   |   |    |     |          |  |  |  |  |     |          |          |  |  |  |     |          |          |          |  |  |     |          |          |          |          |  |       |          |          |          |          |          |       |          |          |          |          |          |       |          |          |          |          |          |  |    |    |  |  |  |       |          |  |  |  |  |       |          |          |  |  |  |
| 10 Ru                                                                                                                          | 3.427181                                                                                                                                                                                                                                                                                                                                                                                                                                                                                                                                                                                                                                                                                                                                                                                                                                                                                                                                                                                                                                                                                                                                                                                                                                                                                                                                                                                                                                                                                                                                                                                                                                                                                                                                                                                                                                                                                                                                                                                                                                                                                                                                                                                                                                                                                                                                                                                                   | 2.252800 | 3.959666 | 3.425836 | 2.304141 |   |   |     |          |  |  |  |  |      |          |          |  |  |  |     |          |          |          |  |  |     |          |          |          |          |  |     |          |          |          |          |          |     |          |          |          |          |          |     |          |          |          |          |          |     |          |          |          |          |          |     |          |          |          |          |          |       |          |          |          |          |          |       |          |          |          |          |          |       |          |          |          |          |          |  |   |   |   |   |    |     |          |  |  |  |  |     |          |          |  |  |  |     |          |          |          |  |  |     |          |          |          |          |  |       |          |          |          |          |          |       |          |          |          |          |          |       |          |          |          |          |          |  |    |    |  |  |  |       |          |  |  |  |  |       |          |          |  |  |  |
| 11 B                                                                                                                           | 1.792970                                                                                                                                                                                                                                                                                                                                                                                                                                                                                                                                                                                                                                                                                                                                                                                                                                                                                                                                                                                                                                                                                                                                                                                                                                                                                                                                                                                                                                                                                                                                                                                                                                                                                                                                                                                                                                                                                                                                                                                                                                                                                                                                                                                                                                                                                                                                                                                                   | 3.402528 | 2.893937 | 1.813953 | 1.852056 |   |   |     |          |  |  |  |  |      |          |          |  |  |  |     |          |          |          |  |  |     |          |          |          |          |  |     |          |          |          |          |          |     |          |          |          |          |          |     |          |          |          |          |          |     |          |          |          |          |          |     |          |          |          |          |          |       |          |          |          |          |          |       |          |          |          |          |          |       |          |          |          |          |          |  |   |   |   |   |    |     |          |  |  |  |  |     |          |          |  |  |  |     |          |          |          |  |  |     |          |          |          |          |  |       |          |          |          |          |          |       |          |          |          |          |          |       |          |          |          |          |          |  |    |    |  |  |  |       |          |  |  |  |  |       |          |          |  |  |  |
| 12 B                                                                                                                           | 2.893937                                                                                                                                                                                                                                                                                                                                                                                                                                                                                                                                                                                                                                                                                                                                                                                                                                                                                                                                                                                                                                                                                                                                                                                                                                                                                                                                                                                                                                                                                                                                                                                                                                                                                                                                                                                                                                                                                                                                                                                                                                                                                                                                                                                                                                                                                                                                                                                                   | 2.217942 | 1.792970 | 2.934397 | 3.064264 |   |   |     |          |  |  |  |  |      |          |          |  |  |  |     |          |          |          |  |  |     |          |          |          |          |  |     |          |          |          |          |          |     |          |          |          |          |          |     |          |          |          |          |          |     |          |          |          |          |          |     |          |          |          |          |          |       |          |          |          |          |          |       |          |          |          |          |          |       |          |          |          |          |          |  |   |   |   |   |    |     |          |  |  |  |  |     |          |          |  |  |  |     |          |          |          |  |  |     |          |          |          |          |  |       |          |          |          |          |          |       |          |          |          |          |          |       |          |          |          |          |          |  |    |    |  |  |  |       |          |  |  |  |  |       |          |          |  |  |  |
|                                                                                                                                | 6                                                                                                                                                                                                                                                                                                                                                                                                                                                                                                                                                                                                                                                                                                                                                                                                                                                                                                                                                                                                                                                                                                                                                                                                                                                                                                                                                                                                                                                                                                                                                                                                                                                                                                                                                                                                                                                                                                                                                                                                                                                                                                                                                                                                                                                                                                                                                                                                          | 7        | 8        | 9        | 10       |   |   |     |          |  |  |  |  |      |          |          |  |  |  |     |          |          |          |  |  |     |          |          |          |          |  |     |          |          |          |          |          |     |          |          |          |          |          |     |          |          |          |          |          |     |          |          |          |          |          |     |          |          |          |          |          |       |          |          |          |          |          |       |          |          |          |          |          |       |          |          |          |          |          |  |   |   |   |   |    |     |          |  |  |  |  |     |          |          |  |  |  |     |          |          |          |  |  |     |          |          |          |          |  |       |          |          |          |          |          |       |          |          |          |          |          |       |          |          |          |          |          |  |    |    |  |  |  |       |          |  |  |  |  |       |          |          |  |  |  |
| 6 B                                                                                                                            | 0.000000                                                                                                                                                                                                                                                                                                                                                                                                                                                                                                                                                                                                                                                                                                                                                                                                                                                                                                                                                                                                                                                                                                                                                                                                                                                                                                                                                                                                                                                                                                                                                                                                                                                                                                                                                                                                                                                                                                                                                                                                                                                                                                                                                                                                                                                                                                                                                                                                   |          |          |          |          |   |   |     |          |  |  |  |  |      |          |          |  |  |  |     |          |          |          |  |  |     |          |          |          |          |  |     |          |          |          |          |          |     |          |          |          |          |          |     |          |          |          |          |          |     |          |          |          |          |          |     |          |          |          |          |          |       |          |          |          |          |          |       |          |          |          |          |          |       |          |          |          |          |          |  |   |   |   |   |    |     |          |  |  |  |  |     |          |          |  |  |  |     |          |          |          |  |  |     |          |          |          |          |  |       |          |          |          |          |          |       |          |          |          |          |          |       |          |          |          |          |          |  |    |    |  |  |  |       |          |  |  |  |  |       |          |          |  |  |  |
| 7 B                                                                                                                            | 2.934397                                                                                                                                                                                                                                                                                                                                                                                                                                                                                                                                                                                                                                                                                                                                                                                                                                                                                                                                                                                                                                                                                                                                                                                                                                                                                                                                                                                                                                                                                                                                                                                                                                                                                                                                                                                                                                                                                                                                                                                                                                                                                                                                                                                                                                                                                                                                                                                                   | 0.000000 |          |          |          |   |   |     |          |  |  |  |  |      |          |          |  |  |  |     |          |          |          |  |  |     |          |          |          |          |  |     |          |          |          |          |          |     |          |          |          |          |          |     |          |          |          |          |          |     |          |          |          |          |          |     |          |          |          |          |          |       |          |          |          |          |          |       |          |          |          |          |          |       |          |          |          |          |          |  |   |   |   |   |    |     |          |  |  |  |  |     |          |          |  |  |  |     |          |          |          |  |  |     |          |          |          |          |  |       |          |          |          |          |          |       |          |          |          |          |          |       |          |          |          |          |          |  |    |    |  |  |  |       |          |  |  |  |  |       |          |          |  |  |  |
| 8 B                                                                                                                            | 3.064264                                                                                                                                                                                                                                                                                                                                                                                                                                                                                                                                                                                                                                                                                                                                                                                                                                                                                                                                                                                                                                                                                                                                                                                                                                                                                                                                                                                                                                                                                                                                                                                                                                                                                                                                                                                                                                                                                                                                                                                                                                                                                                                                                                                                                                                                                                                                                                                                   | 1.736085 | 0.000000 |          |          |   |   |     |          |  |  |  |  |      |          |          |  |  |  |     |          |          |          |  |  |     |          |          |          |          |  |     |          |          |          |          |          |     |          |          |          |          |          |     |          |          |          |          |          |     |          |          |          |          |          |     |          |          |          |          |          |       |          |          |          |          |          |       |          |          |          |          |          |       |          |          |          |          |          |  |   |   |   |   |    |     |          |  |  |  |  |     |          |          |  |  |  |     |          |          |          |  |  |     |          |          |          |          |  |       |          |          |          |          |          |       |          |          |          |          |          |       |          |          |          |          |          |  |    |    |  |  |  |       |          |  |  |  |  |       |          |          |  |  |  |
| 9 B                                                                                                                            | 3.466765                                                                                                                                                                                                                                                                                                                                                                                                                                                                                                                                                                                                                                                                                                                                                                                                                                                                                                                                                                                                                                                                                                                                                                                                                                                                                                                                                                                                                                                                                                                                                                                                                                                                                                                                                                                                                                                                                                                                                                                                                                                                                                                                                                                                                                                                                                                                                                                                   | 1.813953 | 1.852056 | 0.000000 |          |   |   |     |          |  |  |  |  |      |          |          |  |  |  |     |          |          |          |  |  |     |          |          |          |          |  |     |          |          |          |          |          |     |          |          |          |          |          |     |          |          |          |          |          |     |          |          |          |          |          |     |          |          |          |          |          |       |          |          |          |          |          |       |          |          |          |          |          |       |          |          |          |          |          |  |   |   |   |   |    |     |          |  |  |  |  |     |          |          |  |  |  |     |          |          |          |  |  |     |          |          |          |          |  |       |          |          |          |          |          |       |          |          |          |          |          |       |          |          |          |          |          |  |    |    |  |  |  |       |          |  |  |  |  |       |          |          |  |  |  |
| 10 Ru                                                                                                                          | 3.402528                                                                                                                                                                                                                                                                                                                                                                                                                                                                                                                                                                                                                                                                                                                                                                                                                                                                                                                                                                                                                                                                                                                                                                                                                                                                                                                                                                                                                                                                                                                                                                                                                                                                                                                                                                                                                                                                                                                                                                                                                                                                                                                                                                                                                                                                                                                                                                                                   | 3.425836 | 2.304141 | 2.217942 | 0.000000 |   |   |     |          |  |  |  |  |      |          |          |  |  |  |     |          |          |          |  |  |     |          |          |          |          |  |     |          |          |          |          |          |     |          |          |          |          |          |     |          |          |          |          |          |     |          |          |          |          |          |     |          |          |          |          |          |       |          |          |          |          |          |       |          |          |          |          |          |       |          |          |          |          |          |  |   |   |   |   |    |     |          |  |  |  |  |     |          |          |  |  |  |     |          |          |          |  |  |     |          |          |          |          |  |       |          |          |          |          |          |       |          |          |          |          |          |       |          |          |          |          |          |  |    |    |  |  |  |       |          |  |  |  |  |       |          |          |  |  |  |
| 11 B                                                                                                                           | 2.955400                                                                                                                                                                                                                                                                                                                                                                                                                                                                                                                                                                                                                                                                                                                                                                                                                                                                                                                                                                                                                                                                                                                                                                                                                                                                                                                                                                                                                                                                                                                                                                                                                                                                                                                                                                                                                                                                                                                                                                                                                                                                                                                                                                                                                                                                                                                                                                                                   | 2.934397 | 3.064264 | 1.812200 | 2.217942 |   |   |     |          |  |  |  |  |      |          |          |  |  |  |     |          |          |          |  |  |     |          |          |          |          |  |     |          |          |          |          |          |     |          |          |          |          |          |     |          |          |          |          |          |     |          |          |          |          |          |     |          |          |          |          |          |       |          |          |          |          |          |       |          |          |          |          |          |       |          |          |          |          |          |  |   |   |   |   |    |     |          |  |  |  |  |     |          |          |  |  |  |     |          |          |          |  |  |     |          |          |          |          |  |       |          |          |          |          |          |       |          |          |          |          |          |       |          |          |          |          |          |  |    |    |  |  |  |       |          |  |  |  |  |       |          |          |  |  |  |
| 12 B                                                                                                                           | 1.812200                                                                                                                                                                                                                                                                                                                                                                                                                                                                                                                                                                                                                                                                                                                                                                                                                                                                                                                                                                                                                                                                                                                                                                                                                                                                                                                                                                                                                                                                                                                                                                                                                                                                                                                                                                                                                                                                                                                                                                                                                                                                                                                                                                                                                                                                                                                                                                                                   | 1.813953 | 1.852056 | 2.955400 | 3.402528 |   |   |     |          |  |  |  |  |      |          |          |  |  |  |     |          |          |          |  |  |     |          |          |          |          |  |     |          |          |          |          |          |     |          |          |          |          |          |     |          |          |          |          |          |     |          |          |          |          |          |     |          |          |          |          |          |       |          |          |          |          |          |       |          |          |          |          |          |       |          |          |          |          |          |  |   |   |   |   |    |     |          |  |  |  |  |     |          |          |  |  |  |     |          |          |          |  |  |     |          |          |          |          |  |       |          |          |          |          |          |       |          |          |          |          |          |       |          |          |          |          |          |  |    |    |  |  |  |       |          |  |  |  |  |       |          |          |  |  |  |
|                                                                                                                                | 11                                                                                                                                                                                                                                                                                                                                                                                                                                                                                                                                                                                                                                                                                                                                                                                                                                                                                                                                                                                                                                                                                                                                                                                                                                                                                                                                                                                                                                                                                                                                                                                                                                                                                                                                                                                                                                                                                                                                                                                                                                                                                                                                                                                                                                                                                                                                                                                                         | 12       |          |          |          |   |   |     |          |  |  |  |  |      |          |          |  |  |  |     |          |          |          |  |  |     |          |          |          |          |  |     |          |          |          |          |          |     |          |          |          |          |          |     |          |          |          |          |          |     |          |          |          |          |          |     |          |          |          |          |          |       |          |          |          |          |          |       |          |          |          |          |          |       |          |          |          |          |          |  |   |   |   |   |    |     |          |  |  |  |  |     |          |          |  |  |  |     |          |          |          |  |  |     |          |          |          |          |  |       |          |          |          |          |          |       |          |          |          |          |          |       |          |          |          |          |          |  |    |    |  |  |  |       |          |  |  |  |  |       |          |          |  |  |  |
| 11 B                                                                                                                           | 0.000000                                                                                                                                                                                                                                                                                                                                                                                                                                                                                                                                                                                                                                                                                                                                                                                                                                                                                                                                                                                                                                                                                                                                                                                                                                                                                                                                                                                                                                                                                                                                                                                                                                                                                                                                                                                                                                                                                                                                                                                                                                                                                                                                                                                                                                                                                                                                                                                                   |          |          |          |          |   |   |     |          |  |  |  |  |      |          |          |  |  |  |     |          |          |          |  |  |     |          |          |          |          |  |     |          |          |          |          |          |     |          |          |          |          |          |     |          |          |          |          |          |     |          |          |          |          |          |     |          |          |          |          |          |       |          |          |          |          |          |       |          |          |          |          |          |       |          |          |          |          |          |  |   |   |   |   |    |     |          |  |  |  |  |     |          |          |  |  |  |     |          |          |          |  |  |     |          |          |          |          |  |       |          |          |          |          |          |       |          |          |          |          |          |       |          |          |          |          |          |  |    |    |  |  |  |       |          |  |  |  |  |       |          |          |  |  |  |
| 12 B                                                                                                                           | 3.466765                                                                                                                                                                                                                                                                                                                                                                                                                                                                                                                                                                                                                                                                                                                                                                                                                                                                                                                                                                                                                                                                                                                                                                                                                                                                                                                                                                                                                                                                                                                                                                                                                                                                                                                                                                                                                                                                                                                                                                                                                                                                                                                                                                                                                                                                                                                                                                                                   | 0.000000 |          |          |          |   |   |     |          |  |  |  |  |      |          |          |  |  |  |     |          |          |          |  |  |     |          |          |          |          |  |     |          |          |          |          |          |     |          |          |          |          |          |     |          |          |          |          |          |     |          |          |          |          |          |     |          |          |          |          |          |       |          |          |          |          |          |       |          |          |          |          |          |       |          |          |          |          |          |  |   |   |   |   |    |     |          |  |  |  |  |     |          |          |  |  |  |     |          |          |          |  |  |     |          |          |          |          |  |       |          |          |          |          |          |       |          |          |          |          |          |       |          |          |          |          |          |  |    |    |  |  |  |       |          |  |  |  |  |       |          |          |  |  |  |
|  <p>6. -831.59955086 +27.9</p>               | <table border="1"> <thead> <tr> <th></th> <th>1</th> <th>2</th> <th>3</th> <th>4</th> <th>5</th> </tr> </thead> <tbody> <tr><td>1 B</td><td>0.000000</td><td></td><td></td><td></td><td></td></tr> <tr><td>2 B</td><td>1.789874</td><td>0.000000</td><td></td><td></td><td></td></tr> <tr><td>3 B</td><td>3.232224</td><td>1.834111</td><td>0.000000</td><td></td><td></td></tr> <tr><td>4 B</td><td>1.857377</td><td>2.697110</td><td>3.523627</td><td>0.000000</td><td></td></tr> <tr><td>5 B</td><td>1.720509</td><td>2.898741</td><td>3.507061</td><td>1.685528</td><td>0.000000</td></tr> <tr><td>6 B</td><td>3.112204</td><td>3.901709</td><td>3.884633</td><td>3.181070</td><td>1.633485</td></tr> <tr><td>7 B</td><td>1.734924</td><td>1.693266</td><td>3.040799</td><td>1.673122</td><td>2.792413</td></tr> <tr><td>8 B</td><td>2.711796</td><td>1.882823</td><td>1.918823</td><td>2.136704</td><td>3.003160</td></tr> <tr><td>9 B</td><td>3.887381</td><td>2.962882</td><td>1.686799</td><td>3.305297</td><td>3.591534</td></tr> <tr><td>10 B</td><td>3.864219</td><td>3.152338</td><td>1.744169</td><td>3.858965</td><td>3.319588</td></tr> <tr><td>11 Ru</td><td>2.393347</td><td>2.330307</td><td>2.319900</td><td>3.303252</td><td>2.215056</td></tr> <tr><td>12 Ru</td><td>3.376202</td><td>3.538297</td><td>3.032460</td><td>2.493078</td><td>2.153852</td></tr> <tr> <th></th> <th>6</th> <th>7</th> <th>8</th> <th>9</th> <th>10</th> </tr> <tr><td>6 B</td><td>0.000000</td><td></td><td></td><td></td><td></td></tr> <tr><td>7 B</td><td>4.255823</td><td>0.000000</td><td></td><td></td><td></td></tr> <tr><td>8 B</td><td>3.997502</td><td>1.713522</td><td>0.000000</td><td></td><td></td></tr> <tr><td>9 B</td><td>3.894597</td><td>3.372336</td><td>1.712234</td><td>0.000000</td><td></td></tr> <tr><td>10 B</td><td>2.970456</td><td>4.107215</td><td>2.864155</td><td>1.749463</td><td>0.000000</td></tr> <tr><td>11 Ru</td><td>2.138169</td><td>3.459944</td><td>3.175239</td><td>3.218573</td><td>2.150091</td></tr> <tr><td>12 Ru</td><td>2.143766</td><td>3.569824</td><td>2.629755</td><td>2.192908</td><td>2.182361</td></tr> <tr> <th></th> <th>11</th> <th>12</th> <th colspan="3"></th> </tr> <tr><td>11 Ru</td><td>0.000000</td><td></td><td colspan="3"></td></tr> <tr><td>12 Ru</td><td>2.798707</td><td>0.000000</td><td colspan="3"></td></tr> </tbody> </table> |          | 1        | 2        | 3        | 4 | 5 | 1 B | 0.000000 |  |  |  |  | 2 B  | 1.789874 | 0.000000 |  |  |  | 3 B | 3.232224 | 1.834111 | 0.000000 |  |  | 4 B | 1.857377 | 2.697110 | 3.523627 | 0.000000 |  | 5 B | 1.720509 | 2.898741 | 3.507061 | 1.685528 | 0.000000 | 6 B | 3.112204 | 3.901709 | 3.884633 | 3.181070 | 1.633485 | 7 B | 1.734924 | 1.693266 | 3.040799 | 1.673122 | 2.792413 | 8 B | 2.711796 | 1.882823 | 1.918823 | 2.136704 | 3.003160 | 9 B | 3.887381 | 2.962882 | 1.686799 | 3.305297 | 3.591534 | 10 B  | 3.864219 | 3.152338 | 1.744169 | 3.858965 | 3.319588 | 11 Ru | 2.393347 | 2.330307 | 2.319900 | 3.303252 | 2.215056 | 12 Ru | 3.376202 | 3.538297 | 3.032460 | 2.493078 | 2.153852 |  | 6 | 7 | 8 | 9 | 10 | 6 B | 0.000000 |  |  |  |  | 7 B | 4.255823 | 0.000000 |  |  |  | 8 B | 3.997502 | 1.713522 | 0.000000 |  |  | 9 B | 3.894597 | 3.372336 | 1.712234 | 0.000000 |  | 10 B  | 2.970456 | 4.107215 | 2.864155 | 1.749463 | 0.000000 | 11 Ru | 2.138169 | 3.459944 | 3.175239 | 3.218573 | 2.150091 | 12 Ru | 2.143766 | 3.569824 | 2.629755 | 2.192908 | 2.182361 |  | 11 | 12 |  |  |  | 11 Ru | 0.000000 |  |  |  |  | 12 Ru | 2.798707 | 0.000000 |  |  |  |
|                                                                                                                                | 1                                                                                                                                                                                                                                                                                                                                                                                                                                                                                                                                                                                                                                                                                                                                                                                                                                                                                                                                                                                                                                                                                                                                                                                                                                                                                                                                                                                                                                                                                                                                                                                                                                                                                                                                                                                                                                                                                                                                                                                                                                                                                                                                                                                                                                                                                                                                                                                                          | 2        | 3        | 4        | 5        |   |   |     |          |  |  |  |  |      |          |          |  |  |  |     |          |          |          |  |  |     |          |          |          |          |  |     |          |          |          |          |          |     |          |          |          |          |          |     |          |          |          |          |          |     |          |          |          |          |          |     |          |          |          |          |          |       |          |          |          |          |          |       |          |          |          |          |          |       |          |          |          |          |          |  |   |   |   |   |    |     |          |  |  |  |  |     |          |          |  |  |  |     |          |          |          |  |  |     |          |          |          |          |  |       |          |          |          |          |          |       |          |          |          |          |          |       |          |          |          |          |          |  |    |    |  |  |  |       |          |  |  |  |  |       |          |          |  |  |  |
| 1 B                                                                                                                            | 0.000000                                                                                                                                                                                                                                                                                                                                                                                                                                                                                                                                                                                                                                                                                                                                                                                                                                                                                                                                                                                                                                                                                                                                                                                                                                                                                                                                                                                                                                                                                                                                                                                                                                                                                                                                                                                                                                                                                                                                                                                                                                                                                                                                                                                                                                                                                                                                                                                                   |          |          |          |          |   |   |     |          |  |  |  |  |      |          |          |  |  |  |     |          |          |          |  |  |     |          |          |          |          |  |     |          |          |          |          |          |     |          |          |          |          |          |     |          |          |          |          |          |     |          |          |          |          |          |     |          |          |          |          |          |       |          |          |          |          |          |       |          |          |          |          |          |       |          |          |          |          |          |  |   |   |   |   |    |     |          |  |  |  |  |     |          |          |  |  |  |     |          |          |          |  |  |     |          |          |          |          |  |       |          |          |          |          |          |       |          |          |          |          |          |       |          |          |          |          |          |  |    |    |  |  |  |       |          |  |  |  |  |       |          |          |  |  |  |
| 2 B                                                                                                                            | 1.789874                                                                                                                                                                                                                                                                                                                                                                                                                                                                                                                                                                                                                                                                                                                                                                                                                                                                                                                                                                                                                                                                                                                                                                                                                                                                                                                                                                                                                                                                                                                                                                                                                                                                                                                                                                                                                                                                                                                                                                                                                                                                                                                                                                                                                                                                                                                                                                                                   | 0.000000 |          |          |          |   |   |     |          |  |  |  |  |      |          |          |  |  |  |     |          |          |          |  |  |     |          |          |          |          |  |     |          |          |          |          |          |     |          |          |          |          |          |     |          |          |          |          |          |     |          |          |          |          |          |     |          |          |          |          |          |       |          |          |          |          |          |       |          |          |          |          |          |       |          |          |          |          |          |  |   |   |   |   |    |     |          |  |  |  |  |     |          |          |  |  |  |     |          |          |          |  |  |     |          |          |          |          |  |       |          |          |          |          |          |       |          |          |          |          |          |       |          |          |          |          |          |  |    |    |  |  |  |       |          |  |  |  |  |       |          |          |  |  |  |
| 3 B                                                                                                                            | 3.232224                                                                                                                                                                                                                                                                                                                                                                                                                                                                                                                                                                                                                                                                                                                                                                                                                                                                                                                                                                                                                                                                                                                                                                                                                                                                                                                                                                                                                                                                                                                                                                                                                                                                                                                                                                                                                                                                                                                                                                                                                                                                                                                                                                                                                                                                                                                                                                                                   | 1.834111 | 0.000000 |          |          |   |   |     |          |  |  |  |  |      |          |          |  |  |  |     |          |          |          |  |  |     |          |          |          |          |  |     |          |          |          |          |          |     |          |          |          |          |          |     |          |          |          |          |          |     |          |          |          |          |          |     |          |          |          |          |          |       |          |          |          |          |          |       |          |          |          |          |          |       |          |          |          |          |          |  |   |   |   |   |    |     |          |  |  |  |  |     |          |          |  |  |  |     |          |          |          |  |  |     |          |          |          |          |  |       |          |          |          |          |          |       |          |          |          |          |          |       |          |          |          |          |          |  |    |    |  |  |  |       |          |  |  |  |  |       |          |          |  |  |  |
| 4 B                                                                                                                            | 1.857377                                                                                                                                                                                                                                                                                                                                                                                                                                                                                                                                                                                                                                                                                                                                                                                                                                                                                                                                                                                                                                                                                                                                                                                                                                                                                                                                                                                                                                                                                                                                                                                                                                                                                                                                                                                                                                                                                                                                                                                                                                                                                                                                                                                                                                                                                                                                                                                                   | 2.697110 | 3.523627 | 0.000000 |          |   |   |     |          |  |  |  |  |      |          |          |  |  |  |     |          |          |          |  |  |     |          |          |          |          |  |     |          |          |          |          |          |     |          |          |          |          |          |     |          |          |          |          |          |     |          |          |          |          |          |     |          |          |          |          |          |       |          |          |          |          |          |       |          |          |          |          |          |       |          |          |          |          |          |  |   |   |   |   |    |     |          |  |  |  |  |     |          |          |  |  |  |     |          |          |          |  |  |     |          |          |          |          |  |       |          |          |          |          |          |       |          |          |          |          |          |       |          |          |          |          |          |  |    |    |  |  |  |       |          |  |  |  |  |       |          |          |  |  |  |
| 5 B                                                                                                                            | 1.720509                                                                                                                                                                                                                                                                                                                                                                                                                                                                                                                                                                                                                                                                                                                                                                                                                                                                                                                                                                                                                                                                                                                                                                                                                                                                                                                                                                                                                                                                                                                                                                                                                                                                                                                                                                                                                                                                                                                                                                                                                                                                                                                                                                                                                                                                                                                                                                                                   | 2.898741 | 3.507061 | 1.685528 | 0.000000 |   |   |     |          |  |  |  |  |      |          |          |  |  |  |     |          |          |          |  |  |     |          |          |          |          |  |     |          |          |          |          |          |     |          |          |          |          |          |     |          |          |          |          |          |     |          |          |          |          |          |     |          |          |          |          |          |       |          |          |          |          |          |       |          |          |          |          |          |       |          |          |          |          |          |  |   |   |   |   |    |     |          |  |  |  |  |     |          |          |  |  |  |     |          |          |          |  |  |     |          |          |          |          |  |       |          |          |          |          |          |       |          |          |          |          |          |       |          |          |          |          |          |  |    |    |  |  |  |       |          |  |  |  |  |       |          |          |  |  |  |
| 6 B                                                                                                                            | 3.112204                                                                                                                                                                                                                                                                                                                                                                                                                                                                                                                                                                                                                                                                                                                                                                                                                                                                                                                                                                                                                                                                                                                                                                                                                                                                                                                                                                                                                                                                                                                                                                                                                                                                                                                                                                                                                                                                                                                                                                                                                                                                                                                                                                                                                                                                                                                                                                                                   | 3.901709 | 3.884633 | 3.181070 | 1.633485 |   |   |     |          |  |  |  |  |      |          |          |  |  |  |     |          |          |          |  |  |     |          |          |          |          |  |     |          |          |          |          |          |     |          |          |          |          |          |     |          |          |          |          |          |     |          |          |          |          |          |     |          |          |          |          |          |       |          |          |          |          |          |       |          |          |          |          |          |       |          |          |          |          |          |  |   |   |   |   |    |     |          |  |  |  |  |     |          |          |  |  |  |     |          |          |          |  |  |     |          |          |          |          |  |       |          |          |          |          |          |       |          |          |          |          |          |       |          |          |          |          |          |  |    |    |  |  |  |       |          |  |  |  |  |       |          |          |  |  |  |
| 7 B                                                                                                                            | 1.734924                                                                                                                                                                                                                                                                                                                                                                                                                                                                                                                                                                                                                                                                                                                                                                                                                                                                                                                                                                                                                                                                                                                                                                                                                                                                                                                                                                                                                                                                                                                                                                                                                                                                                                                                                                                                                                                                                                                                                                                                                                                                                                                                                                                                                                                                                                                                                                                                   | 1.693266 | 3.040799 | 1.673122 | 2.792413 |   |   |     |          |  |  |  |  |      |          |          |  |  |  |     |          |          |          |  |  |     |          |          |          |          |  |     |          |          |          |          |          |     |          |          |          |          |          |     |          |          |          |          |          |     |          |          |          |          |          |     |          |          |          |          |          |       |          |          |          |          |          |       |          |          |          |          |          |       |          |          |          |          |          |  |   |   |   |   |    |     |          |  |  |  |  |     |          |          |  |  |  |     |          |          |          |  |  |     |          |          |          |          |  |       |          |          |          |          |          |       |          |          |          |          |          |       |          |          |          |          |          |  |    |    |  |  |  |       |          |  |  |  |  |       |          |          |  |  |  |
| 8 B                                                                                                                            | 2.711796                                                                                                                                                                                                                                                                                                                                                                                                                                                                                                                                                                                                                                                                                                                                                                                                                                                                                                                                                                                                                                                                                                                                                                                                                                                                                                                                                                                                                                                                                                                                                                                                                                                                                                                                                                                                                                                                                                                                                                                                                                                                                                                                                                                                                                                                                                                                                                                                   | 1.882823 | 1.918823 | 2.136704 | 3.003160 |   |   |     |          |  |  |  |  |      |          |          |  |  |  |     |          |          |          |  |  |     |          |          |          |          |  |     |          |          |          |          |          |     |          |          |          |          |          |     |          |          |          |          |          |     |          |          |          |          |          |     |          |          |          |          |          |       |          |          |          |          |          |       |          |          |          |          |          |       |          |          |          |          |          |  |   |   |   |   |    |     |          |  |  |  |  |     |          |          |  |  |  |     |          |          |          |  |  |     |          |          |          |          |  |       |          |          |          |          |          |       |          |          |          |          |          |       |          |          |          |          |          |  |    |    |  |  |  |       |          |  |  |  |  |       |          |          |  |  |  |
| 9 B                                                                                                                            | 3.887381                                                                                                                                                                                                                                                                                                                                                                                                                                                                                                                                                                                                                                                                                                                                                                                                                                                                                                                                                                                                                                                                                                                                                                                                                                                                                                                                                                                                                                                                                                                                                                                                                                                                                                                                                                                                                                                                                                                                                                                                                                                                                                                                                                                                                                                                                                                                                                                                   | 2.962882 | 1.686799 | 3.305297 | 3.591534 |   |   |     |          |  |  |  |  |      |          |          |  |  |  |     |          |          |          |  |  |     |          |          |          |          |  |     |          |          |          |          |          |     |          |          |          |          |          |     |          |          |          |          |          |     |          |          |          |          |          |     |          |          |          |          |          |       |          |          |          |          |          |       |          |          |          |          |          |       |          |          |          |          |          |  |   |   |   |   |    |     |          |  |  |  |  |     |          |          |  |  |  |     |          |          |          |  |  |     |          |          |          |          |  |       |          |          |          |          |          |       |          |          |          |          |          |       |          |          |          |          |          |  |    |    |  |  |  |       |          |  |  |  |  |       |          |          |  |  |  |
| 10 B                                                                                                                           | 3.864219                                                                                                                                                                                                                                                                                                                                                                                                                                                                                                                                                                                                                                                                                                                                                                                                                                                                                                                                                                                                                                                                                                                                                                                                                                                                                                                                                                                                                                                                                                                                                                                                                                                                                                                                                                                                                                                                                                                                                                                                                                                                                                                                                                                                                                                                                                                                                                                                   | 3.152338 | 1.744169 | 3.858965 | 3.319588 |   |   |     |          |  |  |  |  |      |          |          |  |  |  |     |          |          |          |  |  |     |          |          |          |          |  |     |          |          |          |          |          |     |          |          |          |          |          |     |          |          |          |          |          |     |          |          |          |          |          |     |          |          |          |          |          |       |          |          |          |          |          |       |          |          |          |          |          |       |          |          |          |          |          |  |   |   |   |   |    |     |          |  |  |  |  |     |          |          |  |  |  |     |          |          |          |  |  |     |          |          |          |          |  |       |          |          |          |          |          |       |          |          |          |          |          |       |          |          |          |          |          |  |    |    |  |  |  |       |          |  |  |  |  |       |          |          |  |  |  |
| 11 Ru                                                                                                                          | 2.393347                                                                                                                                                                                                                                                                                                                                                                                                                                                                                                                                                                                                                                                                                                                                                                                                                                                                                                                                                                                                                                                                                                                                                                                                                                                                                                                                                                                                                                                                                                                                                                                                                                                                                                                                                                                                                                                                                                                                                                                                                                                                                                                                                                                                                                                                                                                                                                                                   | 2.330307 | 2.319900 | 3.303252 | 2.215056 |   |   |     |          |  |  |  |  |      |          |          |  |  |  |     |          |          |          |  |  |     |          |          |          |          |  |     |          |          |          |          |          |     |          |          |          |          |          |     |          |          |          |          |          |     |          |          |          |          |          |     |          |          |          |          |          |       |          |          |          |          |          |       |          |          |          |          |          |       |          |          |          |          |          |  |   |   |   |   |    |     |          |  |  |  |  |     |          |          |  |  |  |     |          |          |          |  |  |     |          |          |          |          |  |       |          |          |          |          |          |       |          |          |          |          |          |       |          |          |          |          |          |  |    |    |  |  |  |       |          |  |  |  |  |       |          |          |  |  |  |
| 12 Ru                                                                                                                          | 3.376202                                                                                                                                                                                                                                                                                                                                                                                                                                                                                                                                                                                                                                                                                                                                                                                                                                                                                                                                                                                                                                                                                                                                                                                                                                                                                                                                                                                                                                                                                                                                                                                                                                                                                                                                                                                                                                                                                                                                                                                                                                                                                                                                                                                                                                                                                                                                                                                                   | 3.538297 | 3.032460 | 2.493078 | 2.153852 |   |   |     |          |  |  |  |  |      |          |          |  |  |  |     |          |          |          |  |  |     |          |          |          |          |  |     |          |          |          |          |          |     |          |          |          |          |          |     |          |          |          |          |          |     |          |          |          |          |          |     |          |          |          |          |          |       |          |          |          |          |          |       |          |          |          |          |          |       |          |          |          |          |          |  |   |   |   |   |    |     |          |  |  |  |  |     |          |          |  |  |  |     |          |          |          |  |  |     |          |          |          |          |  |       |          |          |          |          |          |       |          |          |          |          |          |       |          |          |          |          |          |  |    |    |  |  |  |       |          |  |  |  |  |       |          |          |  |  |  |
|                                                                                                                                | 6                                                                                                                                                                                                                                                                                                                                                                                                                                                                                                                                                                                                                                                                                                                                                                                                                                                                                                                                                                                                                                                                                                                                                                                                                                                                                                                                                                                                                                                                                                                                                                                                                                                                                                                                                                                                                                                                                                                                                                                                                                                                                                                                                                                                                                                                                                                                                                                                          | 7        | 8        | 9        | 10       |   |   |     |          |  |  |  |  |      |          |          |  |  |  |     |          |          |          |  |  |     |          |          |          |          |  |     |          |          |          |          |          |     |          |          |          |          |          |     |          |          |          |          |          |     |          |          |          |          |          |     |          |          |          |          |          |       |          |          |          |          |          |       |          |          |          |          |          |       |          |          |          |          |          |  |   |   |   |   |    |     |          |  |  |  |  |     |          |          |  |  |  |     |          |          |          |  |  |     |          |          |          |          |  |       |          |          |          |          |          |       |          |          |          |          |          |       |          |          |          |          |          |  |    |    |  |  |  |       |          |  |  |  |  |       |          |          |  |  |  |
| 6 B                                                                                                                            | 0.000000                                                                                                                                                                                                                                                                                                                                                                                                                                                                                                                                                                                                                                                                                                                                                                                                                                                                                                                                                                                                                                                                                                                                                                                                                                                                                                                                                                                                                                                                                                                                                                                                                                                                                                                                                                                                                                                                                                                                                                                                                                                                                                                                                                                                                                                                                                                                                                                                   |          |          |          |          |   |   |     |          |  |  |  |  |      |          |          |  |  |  |     |          |          |          |  |  |     |          |          |          |          |  |     |          |          |          |          |          |     |          |          |          |          |          |     |          |          |          |          |          |     |          |          |          |          |          |     |          |          |          |          |          |       |          |          |          |          |          |       |          |          |          |          |          |       |          |          |          |          |          |  |   |   |   |   |    |     |          |  |  |  |  |     |          |          |  |  |  |     |          |          |          |  |  |     |          |          |          |          |  |       |          |          |          |          |          |       |          |          |          |          |          |       |          |          |          |          |          |  |    |    |  |  |  |       |          |  |  |  |  |       |          |          |  |  |  |
| 7 B                                                                                                                            | 4.255823                                                                                                                                                                                                                                                                                                                                                                                                                                                                                                                                                                                                                                                                                                                                                                                                                                                                                                                                                                                                                                                                                                                                                                                                                                                                                                                                                                                                                                                                                                                                                                                                                                                                                                                                                                                                                                                                                                                                                                                                                                                                                                                                                                                                                                                                                                                                                                                                   | 0.000000 |          |          |          |   |   |     |          |  |  |  |  |      |          |          |  |  |  |     |          |          |          |  |  |     |          |          |          |          |  |     |          |          |          |          |          |     |          |          |          |          |          |     |          |          |          |          |          |     |          |          |          |          |          |     |          |          |          |          |          |       |          |          |          |          |          |       |          |          |          |          |          |       |          |          |          |          |          |  |   |   |   |   |    |     |          |  |  |  |  |     |          |          |  |  |  |     |          |          |          |  |  |     |          |          |          |          |  |       |          |          |          |          |          |       |          |          |          |          |          |       |          |          |          |          |          |  |    |    |  |  |  |       |          |  |  |  |  |       |          |          |  |  |  |
| 8 B                                                                                                                            | 3.997502                                                                                                                                                                                                                                                                                                                                                                                                                                                                                                                                                                                                                                                                                                                                                                                                                                                                                                                                                                                                                                                                                                                                                                                                                                                                                                                                                                                                                                                                                                                                                                                                                                                                                                                                                                                                                                                                                                                                                                                                                                                                                                                                                                                                                                                                                                                                                                                                   | 1.713522 | 0.000000 |          |          |   |   |     |          |  |  |  |  |      |          |          |  |  |  |     |          |          |          |  |  |     |          |          |          |          |  |     |          |          |          |          |          |     |          |          |          |          |          |     |          |          |          |          |          |     |          |          |          |          |          |     |          |          |          |          |          |       |          |          |          |          |          |       |          |          |          |          |          |       |          |          |          |          |          |  |   |   |   |   |    |     |          |  |  |  |  |     |          |          |  |  |  |     |          |          |          |  |  |     |          |          |          |          |  |       |          |          |          |          |          |       |          |          |          |          |          |       |          |          |          |          |          |  |    |    |  |  |  |       |          |  |  |  |  |       |          |          |  |  |  |
| 9 B                                                                                                                            | 3.894597                                                                                                                                                                                                                                                                                                                                                                                                                                                                                                                                                                                                                                                                                                                                                                                                                                                                                                                                                                                                                                                                                                                                                                                                                                                                                                                                                                                                                                                                                                                                                                                                                                                                                                                                                                                                                                                                                                                                                                                                                                                                                                                                                                                                                                                                                                                                                                                                   | 3.372336 | 1.712234 | 0.000000 |          |   |   |     |          |  |  |  |  |      |          |          |  |  |  |     |          |          |          |  |  |     |          |          |          |          |  |     |          |          |          |          |          |     |          |          |          |          |          |     |          |          |          |          |          |     |          |          |          |          |          |     |          |          |          |          |          |       |          |          |          |          |          |       |          |          |          |          |          |       |          |          |          |          |          |  |   |   |   |   |    |     |          |  |  |  |  |     |          |          |  |  |  |     |          |          |          |  |  |     |          |          |          |          |  |       |          |          |          |          |          |       |          |          |          |          |          |       |          |          |          |          |          |  |    |    |  |  |  |       |          |  |  |  |  |       |          |          |  |  |  |
| 10 B                                                                                                                           | 2.970456                                                                                                                                                                                                                                                                                                                                                                                                                                                                                                                                                                                                                                                                                                                                                                                                                                                                                                                                                                                                                                                                                                                                                                                                                                                                                                                                                                                                                                                                                                                                                                                                                                                                                                                                                                                                                                                                                                                                                                                                                                                                                                                                                                                                                                                                                                                                                                                                   | 4.107215 | 2.864155 | 1.749463 | 0.000000 |   |   |     |          |  |  |  |  |      |          |          |  |  |  |     |          |          |          |  |  |     |          |          |          |          |  |     |          |          |          |          |          |     |          |          |          |          |          |     |          |          |          |          |          |     |          |          |          |          |          |     |          |          |          |          |          |       |          |          |          |          |          |       |          |          |          |          |          |       |          |          |          |          |          |  |   |   |   |   |    |     |          |  |  |  |  |     |          |          |  |  |  |     |          |          |          |  |  |     |          |          |          |          |  |       |          |          |          |          |          |       |          |          |          |          |          |       |          |          |          |          |          |  |    |    |  |  |  |       |          |  |  |  |  |       |          |          |  |  |  |
| 11 Ru                                                                                                                          | 2.138169                                                                                                                                                                                                                                                                                                                                                                                                                                                                                                                                                                                                                                                                                                                                                                                                                                                                                                                                                                                                                                                                                                                                                                                                                                                                                                                                                                                                                                                                                                                                                                                                                                                                                                                                                                                                                                                                                                                                                                                                                                                                                                                                                                                                                                                                                                                                                                                                   | 3.459944 | 3.175239 | 3.218573 | 2.150091 |   |   |     |          |  |  |  |  |      |          |          |  |  |  |     |          |          |          |  |  |     |          |          |          |          |  |     |          |          |          |          |          |     |          |          |          |          |          |     |          |          |          |          |          |     |          |          |          |          |          |     |          |          |          |          |          |       |          |          |          |          |          |       |          |          |          |          |          |       |          |          |          |          |          |  |   |   |   |   |    |     |          |  |  |  |  |     |          |          |  |  |  |     |          |          |          |  |  |     |          |          |          |          |  |       |          |          |          |          |          |       |          |          |          |          |          |       |          |          |          |          |          |  |    |    |  |  |  |       |          |  |  |  |  |       |          |          |  |  |  |
| 12 Ru                                                                                                                          | 2.143766                                                                                                                                                                                                                                                                                                                                                                                                                                                                                                                                                                                                                                                                                                                                                                                                                                                                                                                                                                                                                                                                                                                                                                                                                                                                                                                                                                                                                                                                                                                                                                                                                                                                                                                                                                                                                                                                                                                                                                                                                                                                                                                                                                                                                                                                                                                                                                                                   | 3.569824 | 2.629755 | 2.192908 | 2.182361 |   |   |     |          |  |  |  |  |      |          |          |  |  |  |     |          |          |          |  |  |     |          |          |          |          |  |     |          |          |          |          |          |     |          |          |          |          |          |     |          |          |          |          |          |     |          |          |          |          |          |     |          |          |          |          |          |       |          |          |          |          |          |       |          |          |          |          |          |       |          |          |          |          |          |  |   |   |   |   |    |     |          |  |  |  |  |     |          |          |  |  |  |     |          |          |          |  |  |     |          |          |          |          |  |       |          |          |          |          |          |       |          |          |          |          |          |       |          |          |          |          |          |  |    |    |  |  |  |       |          |  |  |  |  |       |          |          |  |  |  |
|                                                                                                                                | 11                                                                                                                                                                                                                                                                                                                                                                                                                                                                                                                                                                                                                                                                                                                                                                                                                                                                                                                                                                                                                                                                                                                                                                                                                                                                                                                                                                                                                                                                                                                                                                                                                                                                                                                                                                                                                                                                                                                                                                                                                                                                                                                                                                                                                                                                                                                                                                                                         | 12       |          |          |          |   |   |     |          |  |  |  |  |      |          |          |  |  |  |     |          |          |          |  |  |     |          |          |          |          |  |     |          |          |          |          |          |     |          |          |          |          |          |     |          |          |          |          |          |     |          |          |          |          |          |     |          |          |          |          |          |       |          |          |          |          |          |       |          |          |          |          |          |       |          |          |          |          |          |  |   |   |   |   |    |     |          |  |  |  |  |     |          |          |  |  |  |     |          |          |          |  |  |     |          |          |          |          |  |       |          |          |          |          |          |       |          |          |          |          |          |       |          |          |          |          |          |  |    |    |  |  |  |       |          |  |  |  |  |       |          |          |  |  |  |
| 11 Ru                                                                                                                          | 0.000000                                                                                                                                                                                                                                                                                                                                                                                                                                                                                                                                                                                                                                                                                                                                                                                                                                                                                                                                                                                                                                                                                                                                                                                                                                                                                                                                                                                                                                                                                                                                                                                                                                                                                                                                                                                                                                                                                                                                                                                                                                                                                                                                                                                                                                                                                                                                                                                                   |          |          |          |          |   |   |     |          |  |  |  |  |      |          |          |  |  |  |     |          |          |          |  |  |     |          |          |          |          |  |     |          |          |          |          |          |     |          |          |          |          |          |     |          |          |          |          |          |     |          |          |          |          |          |     |          |          |          |          |          |       |          |          |          |          |          |       |          |          |          |          |          |       |          |          |          |          |          |  |   |   |   |   |    |     |          |  |  |  |  |     |          |          |  |  |  |     |          |          |          |  |  |     |          |          |          |          |  |       |          |          |          |          |          |       |          |          |          |          |          |       |          |          |          |          |          |  |    |    |  |  |  |       |          |  |  |  |  |       |          |          |  |  |  |
| 12 Ru                                                                                                                          | 2.798707                                                                                                                                                                                                                                                                                                                                                                                                                                                                                                                                                                                                                                                                                                                                                                                                                                                                                                                                                                                                                                                                                                                                                                                                                                                                                                                                                                                                                                                                                                                                                                                                                                                                                                                                                                                                                                                                                                                                                                                                                                                                                                                                                                                                                                                                                                                                                                                                   | 0.000000 |          |          |          |   |   |     |          |  |  |  |  |      |          |          |  |  |  |     |          |          |          |  |  |     |          |          |          |          |  |     |          |          |          |          |          |     |          |          |          |          |          |     |          |          |          |          |          |     |          |          |          |          |          |     |          |          |          |          |          |       |          |          |          |          |          |       |          |          |          |          |          |       |          |          |          |          |          |  |   |   |   |   |    |     |          |  |  |  |  |     |          |          |  |  |  |     |          |          |          |  |  |     |          |          |          |          |  |       |          |          |          |          |          |       |          |          |          |          |          |       |          |          |          |          |          |  |    |    |  |  |  |       |          |  |  |  |  |       |          |          |  |  |  |

| 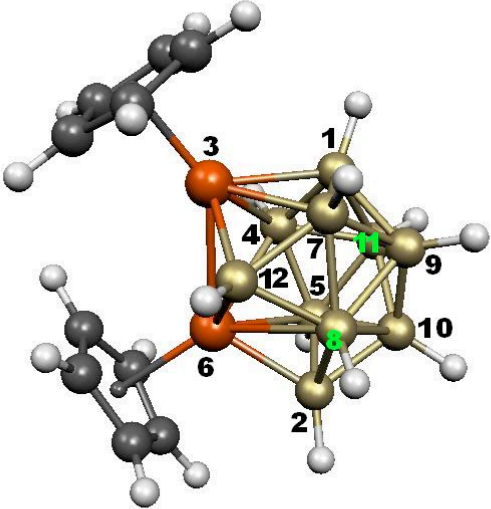 <p>7. -831.59725636 +29.4</p>                | <table border="1"> <thead> <tr> <th></th> <th>1</th> <th>2</th> <th>3</th> <th>4</th> <th>5</th> </tr> </thead> <tbody> <tr><td>1 B</td><td>0.000000</td><td></td><td></td><td></td><td></td></tr> <tr><td>2 B</td><td>3.746967</td><td>0.000000</td><td></td><td></td><td></td></tr> <tr><td>3 Ru</td><td>2.218846</td><td>3.988466</td><td>0.000000</td><td></td><td></td></tr> <tr><td>4 B</td><td>1.811832</td><td>3.084798</td><td>2.265909</td><td>0.000000</td><td></td></tr> <tr><td>5 B</td><td>2.971231</td><td>1.783152</td><td>3.603903</td><td>1.788034</td><td>0.000000</td></tr> <tr><td>6 Ru</td><td>3.386024</td><td>2.041723</td><td>2.523603</td><td>2.375198</td><td>2.261159</td></tr> <tr><td>7 B</td><td>1.761803</td><td>3.467659</td><td>2.210903</td><td>2.927612</td><td>3.578271</td></tr> <tr><td>8 B</td><td>2.880509</td><td>1.843207</td><td>3.208150</td><td>3.149552</td><td>2.769022</td></tr> <tr><td>9 B</td><td>1.814608</td><td>2.962211</td><td>3.405850</td><td>2.828903</td><td>2.865589</td></tr> <tr><td>10 B</td><td>2.936986</td><td>1.737002</td><td>4.141003</td><td>2.863368</td><td>1.801863</td></tr> <tr><td>11 B</td><td>1.788066</td><td>2.950792</td><td>3.483424</td><td>1.753203</td><td>1.789862</td></tr> <tr><td>12 B</td><td>3.062024</td><td>3.071577</td><td>2.066579</td><td>3.288088</td><td>3.680040</td></tr> <tr> <td></td> <td>6</td> <td>7</td> <td>8</td> <td>9</td> <td>10</td> </tr> <tr><td>6 Ru</td><td>0.000000</td><td></td><td></td><td></td><td></td></tr> <tr><td>7 B</td><td>3.175715</td><td>0.000000</td><td></td><td></td><td></td></tr> <tr><td>8 B</td><td>2.453810</td><td>1.891199</td><td>0.000000</td><td></td><td></td></tr> <tr><td>9 B</td><td>3.569365</td><td>1.722694</td><td>1.860682</td><td>0.000000</td><td></td></tr> <tr><td>10 B</td><td>3.154281</td><td>3.042405</td><td>1.946240</td><td>1.740865</td><td>0.000000</td></tr> <tr><td>11 B</td><td>3.376738</td><td>2.909525</td><td>2.888319</td><td>1.797117</td><td>1.762920</td></tr> <tr><td>12 B</td><td>2.182602</td><td>1.802175</td><td>1.873829</td><td>3.059178</td><td>3.594331</td></tr> <tr> <td></td> <td>11</td> <td>12</td> <td></td> <td></td> <td></td> </tr> <tr><td>11 B</td><td>0.000000</td><td></td><td></td><td></td><td></td></tr> <tr><td>12 B</td><td>3.875467</td><td>0.000000</td><td></td><td></td><td></td></tr> </tbody> </table>   |          | 1        | 2        | 3        | 4 | 5 | 1 B | 0.000000 |  |  |  |  | 2 B | 3.746967 | 0.000000 |  |  |  | 3 Ru | 2.218846 | 3.988466 | 0.000000 |  |  | 4 B | 1.811832 | 3.084798 | 2.265909 | 0.000000 |  | 5 B | 2.971231 | 1.783152 | 3.603903 | 1.788034 | 0.000000 | 6 Ru | 3.386024 | 2.041723 | 2.523603 | 2.375198 | 2.261159 | 7 B | 1.761803 | 3.467659 | 2.210903 | 2.927612 | 3.578271 | 8 B  | 2.880509 | 1.843207 | 3.208150 | 3.149552 | 2.769022 | 9 B | 1.814608 | 2.962211 | 3.405850 | 2.828903 | 2.865589 | 10 B | 2.936986 | 1.737002 | 4.141003 | 2.863368 | 1.801863 | 11 B | 1.788066 | 2.950792 | 3.483424 | 1.753203 | 1.789862 | 12 B  | 3.062024 | 3.071577 | 2.066579 | 3.288088 | 3.680040 |  | 6 | 7 | 8 | 9 | 10 | 6 Ru | 0.000000 |  |  |  |  | 7 B | 3.175715 | 0.000000 |  |  |  | 8 B  | 2.453810 | 1.891199 | 0.000000 |  |  | 9 B | 3.569365 | 1.722694 | 1.860682 | 0.000000 |  | 10 B | 3.154281 | 3.042405 | 1.946240 | 1.740865 | 0.000000 | 11 B | 3.376738 | 2.909525 | 2.888319 | 1.797117 | 1.762920 | 12 B  | 2.182602 | 1.802175 | 1.873829 | 3.059178 | 3.594331 |  | 11 | 12 |  |  |  | 11 B | 0.000000 |  |  |  |  | 12 B  | 3.875467 | 0.000000 |  |  |  |
|--------------------------------------------------------------------------------------------------------------------------------|-------------------------------------------------------------------------------------------------------------------------------------------------------------------------------------------------------------------------------------------------------------------------------------------------------------------------------------------------------------------------------------------------------------------------------------------------------------------------------------------------------------------------------------------------------------------------------------------------------------------------------------------------------------------------------------------------------------------------------------------------------------------------------------------------------------------------------------------------------------------------------------------------------------------------------------------------------------------------------------------------------------------------------------------------------------------------------------------------------------------------------------------------------------------------------------------------------------------------------------------------------------------------------------------------------------------------------------------------------------------------------------------------------------------------------------------------------------------------------------------------------------------------------------------------------------------------------------------------------------------------------------------------------------------------------------------------------------------------------------------------------------------------------------------------------------------------------------------------------------------------------------------------------------------------------------------------------------------------------------------------------------------------------------------------------------------------------------------------------------------------------------------------------------------------------------------------------------------------------------------------------------------------------------------------------------------------------------------------------------------------------------------------------------------------------|----------|----------|----------|----------|---|---|-----|----------|--|--|--|--|-----|----------|----------|--|--|--|------|----------|----------|----------|--|--|-----|----------|----------|----------|----------|--|-----|----------|----------|----------|----------|----------|------|----------|----------|----------|----------|----------|-----|----------|----------|----------|----------|----------|------|----------|----------|----------|----------|----------|-----|----------|----------|----------|----------|----------|------|----------|----------|----------|----------|----------|------|----------|----------|----------|----------|----------|-------|----------|----------|----------|----------|----------|--|---|---|---|---|----|------|----------|--|--|--|--|-----|----------|----------|--|--|--|------|----------|----------|----------|--|--|-----|----------|----------|----------|----------|--|------|----------|----------|----------|----------|----------|------|----------|----------|----------|----------|----------|-------|----------|----------|----------|----------|----------|--|----|----|--|--|--|------|----------|--|--|--|--|-------|----------|----------|--|--|--|
|                                                                                                                                | 1                                                                                                                                                                                                                                                                                                                                                                                                                                                                                                                                                                                                                                                                                                                                                                                                                                                                                                                                                                                                                                                                                                                                                                                                                                                                                                                                                                                                                                                                                                                                                                                                                                                                                                                                                                                                                                                                                                                                                                                                                                                                                                                                                                                                                                                                                                                                                                                                                             | 2        | 3        | 4        | 5        |   |   |     |          |  |  |  |  |     |          |          |  |  |  |      |          |          |          |  |  |     |          |          |          |          |  |     |          |          |          |          |          |      |          |          |          |          |          |     |          |          |          |          |          |      |          |          |          |          |          |     |          |          |          |          |          |      |          |          |          |          |          |      |          |          |          |          |          |       |          |          |          |          |          |  |   |   |   |   |    |      |          |  |  |  |  |     |          |          |  |  |  |      |          |          |          |  |  |     |          |          |          |          |  |      |          |          |          |          |          |      |          |          |          |          |          |       |          |          |          |          |          |  |    |    |  |  |  |      |          |  |  |  |  |       |          |          |  |  |  |
| 1 B                                                                                                                            | 0.000000                                                                                                                                                                                                                                                                                                                                                                                                                                                                                                                                                                                                                                                                                                                                                                                                                                                                                                                                                                                                                                                                                                                                                                                                                                                                                                                                                                                                                                                                                                                                                                                                                                                                                                                                                                                                                                                                                                                                                                                                                                                                                                                                                                                                                                                                                                                                                                                                                      |          |          |          |          |   |   |     |          |  |  |  |  |     |          |          |  |  |  |      |          |          |          |  |  |     |          |          |          |          |  |     |          |          |          |          |          |      |          |          |          |          |          |     |          |          |          |          |          |      |          |          |          |          |          |     |          |          |          |          |          |      |          |          |          |          |          |      |          |          |          |          |          |       |          |          |          |          |          |  |   |   |   |   |    |      |          |  |  |  |  |     |          |          |  |  |  |      |          |          |          |  |  |     |          |          |          |          |  |      |          |          |          |          |          |      |          |          |          |          |          |       |          |          |          |          |          |  |    |    |  |  |  |      |          |  |  |  |  |       |          |          |  |  |  |
| 2 B                                                                                                                            | 3.746967                                                                                                                                                                                                                                                                                                                                                                                                                                                                                                                                                                                                                                                                                                                                                                                                                                                                                                                                                                                                                                                                                                                                                                                                                                                                                                                                                                                                                                                                                                                                                                                                                                                                                                                                                                                                                                                                                                                                                                                                                                                                                                                                                                                                                                                                                                                                                                                                                      | 0.000000 |          |          |          |   |   |     |          |  |  |  |  |     |          |          |  |  |  |      |          |          |          |  |  |     |          |          |          |          |  |     |          |          |          |          |          |      |          |          |          |          |          |     |          |          |          |          |          |      |          |          |          |          |          |     |          |          |          |          |          |      |          |          |          |          |          |      |          |          |          |          |          |       |          |          |          |          |          |  |   |   |   |   |    |      |          |  |  |  |  |     |          |          |  |  |  |      |          |          |          |  |  |     |          |          |          |          |  |      |          |          |          |          |          |      |          |          |          |          |          |       |          |          |          |          |          |  |    |    |  |  |  |      |          |  |  |  |  |       |          |          |  |  |  |
| 3 Ru                                                                                                                           | 2.218846                                                                                                                                                                                                                                                                                                                                                                                                                                                                                                                                                                                                                                                                                                                                                                                                                                                                                                                                                                                                                                                                                                                                                                                                                                                                                                                                                                                                                                                                                                                                                                                                                                                                                                                                                                                                                                                                                                                                                                                                                                                                                                                                                                                                                                                                                                                                                                                                                      | 3.988466 | 0.000000 |          |          |   |   |     |          |  |  |  |  |     |          |          |  |  |  |      |          |          |          |  |  |     |          |          |          |          |  |     |          |          |          |          |          |      |          |          |          |          |          |     |          |          |          |          |          |      |          |          |          |          |          |     |          |          |          |          |          |      |          |          |          |          |          |      |          |          |          |          |          |       |          |          |          |          |          |  |   |   |   |   |    |      |          |  |  |  |  |     |          |          |  |  |  |      |          |          |          |  |  |     |          |          |          |          |  |      |          |          |          |          |          |      |          |          |          |          |          |       |          |          |          |          |          |  |    |    |  |  |  |      |          |  |  |  |  |       |          |          |  |  |  |
| 4 B                                                                                                                            | 1.811832                                                                                                                                                                                                                                                                                                                                                                                                                                                                                                                                                                                                                                                                                                                                                                                                                                                                                                                                                                                                                                                                                                                                                                                                                                                                                                                                                                                                                                                                                                                                                                                                                                                                                                                                                                                                                                                                                                                                                                                                                                                                                                                                                                                                                                                                                                                                                                                                                      | 3.084798 | 2.265909 | 0.000000 |          |   |   |     |          |  |  |  |  |     |          |          |  |  |  |      |          |          |          |  |  |     |          |          |          |          |  |     |          |          |          |          |          |      |          |          |          |          |          |     |          |          |          |          |          |      |          |          |          |          |          |     |          |          |          |          |          |      |          |          |          |          |          |      |          |          |          |          |          |       |          |          |          |          |          |  |   |   |   |   |    |      |          |  |  |  |  |     |          |          |  |  |  |      |          |          |          |  |  |     |          |          |          |          |  |      |          |          |          |          |          |      |          |          |          |          |          |       |          |          |          |          |          |  |    |    |  |  |  |      |          |  |  |  |  |       |          |          |  |  |  |
| 5 B                                                                                                                            | 2.971231                                                                                                                                                                                                                                                                                                                                                                                                                                                                                                                                                                                                                                                                                                                                                                                                                                                                                                                                                                                                                                                                                                                                                                                                                                                                                                                                                                                                                                                                                                                                                                                                                                                                                                                                                                                                                                                                                                                                                                                                                                                                                                                                                                                                                                                                                                                                                                                                                      | 1.783152 | 3.603903 | 1.788034 | 0.000000 |   |   |     |          |  |  |  |  |     |          |          |  |  |  |      |          |          |          |  |  |     |          |          |          |          |  |     |          |          |          |          |          |      |          |          |          |          |          |     |          |          |          |          |          |      |          |          |          |          |          |     |          |          |          |          |          |      |          |          |          |          |          |      |          |          |          |          |          |       |          |          |          |          |          |  |   |   |   |   |    |      |          |  |  |  |  |     |          |          |  |  |  |      |          |          |          |  |  |     |          |          |          |          |  |      |          |          |          |          |          |      |          |          |          |          |          |       |          |          |          |          |          |  |    |    |  |  |  |      |          |  |  |  |  |       |          |          |  |  |  |
| 6 Ru                                                                                                                           | 3.386024                                                                                                                                                                                                                                                                                                                                                                                                                                                                                                                                                                                                                                                                                                                                                                                                                                                                                                                                                                                                                                                                                                                                                                                                                                                                                                                                                                                                                                                                                                                                                                                                                                                                                                                                                                                                                                                                                                                                                                                                                                                                                                                                                                                                                                                                                                                                                                                                                      | 2.041723 | 2.523603 | 2.375198 | 2.261159 |   |   |     |          |  |  |  |  |     |          |          |  |  |  |      |          |          |          |  |  |     |          |          |          |          |  |     |          |          |          |          |          |      |          |          |          |          |          |     |          |          |          |          |          |      |          |          |          |          |          |     |          |          |          |          |          |      |          |          |          |          |          |      |          |          |          |          |          |       |          |          |          |          |          |  |   |   |   |   |    |      |          |  |  |  |  |     |          |          |  |  |  |      |          |          |          |  |  |     |          |          |          |          |  |      |          |          |          |          |          |      |          |          |          |          |          |       |          |          |          |          |          |  |    |    |  |  |  |      |          |  |  |  |  |       |          |          |  |  |  |
| 7 B                                                                                                                            | 1.761803                                                                                                                                                                                                                                                                                                                                                                                                                                                                                                                                                                                                                                                                                                                                                                                                                                                                                                                                                                                                                                                                                                                                                                                                                                                                                                                                                                                                                                                                                                                                                                                                                                                                                                                                                                                                                                                                                                                                                                                                                                                                                                                                                                                                                                                                                                                                                                                                                      | 3.467659 | 2.210903 | 2.927612 | 3.578271 |   |   |     |          |  |  |  |  |     |          |          |  |  |  |      |          |          |          |  |  |     |          |          |          |          |  |     |          |          |          |          |          |      |          |          |          |          |          |     |          |          |          |          |          |      |          |          |          |          |          |     |          |          |          |          |          |      |          |          |          |          |          |      |          |          |          |          |          |       |          |          |          |          |          |  |   |   |   |   |    |      |          |  |  |  |  |     |          |          |  |  |  |      |          |          |          |  |  |     |          |          |          |          |  |      |          |          |          |          |          |      |          |          |          |          |          |       |          |          |          |          |          |  |    |    |  |  |  |      |          |  |  |  |  |       |          |          |  |  |  |
| 8 B                                                                                                                            | 2.880509                                                                                                                                                                                                                                                                                                                                                                                                                                                                                                                                                                                                                                                                                                                                                                                                                                                                                                                                                                                                                                                                                                                                                                                                                                                                                                                                                                                                                                                                                                                                                                                                                                                                                                                                                                                                                                                                                                                                                                                                                                                                                                                                                                                                                                                                                                                                                                                                                      | 1.843207 | 3.208150 | 3.149552 | 2.769022 |   |   |     |          |  |  |  |  |     |          |          |  |  |  |      |          |          |          |  |  |     |          |          |          |          |  |     |          |          |          |          |          |      |          |          |          |          |          |     |          |          |          |          |          |      |          |          |          |          |          |     |          |          |          |          |          |      |          |          |          |          |          |      |          |          |          |          |          |       |          |          |          |          |          |  |   |   |   |   |    |      |          |  |  |  |  |     |          |          |  |  |  |      |          |          |          |  |  |     |          |          |          |          |  |      |          |          |          |          |          |      |          |          |          |          |          |       |          |          |          |          |          |  |    |    |  |  |  |      |          |  |  |  |  |       |          |          |  |  |  |
| 9 B                                                                                                                            | 1.814608                                                                                                                                                                                                                                                                                                                                                                                                                                                                                                                                                                                                                                                                                                                                                                                                                                                                                                                                                                                                                                                                                                                                                                                                                                                                                                                                                                                                                                                                                                                                                                                                                                                                                                                                                                                                                                                                                                                                                                                                                                                                                                                                                                                                                                                                                                                                                                                                                      | 2.962211 | 3.405850 | 2.828903 | 2.865589 |   |   |     |          |  |  |  |  |     |          |          |  |  |  |      |          |          |          |  |  |     |          |          |          |          |  |     |          |          |          |          |          |      |          |          |          |          |          |     |          |          |          |          |          |      |          |          |          |          |          |     |          |          |          |          |          |      |          |          |          |          |          |      |          |          |          |          |          |       |          |          |          |          |          |  |   |   |   |   |    |      |          |  |  |  |  |     |          |          |  |  |  |      |          |          |          |  |  |     |          |          |          |          |  |      |          |          |          |          |          |      |          |          |          |          |          |       |          |          |          |          |          |  |    |    |  |  |  |      |          |  |  |  |  |       |          |          |  |  |  |
| 10 B                                                                                                                           | 2.936986                                                                                                                                                                                                                                                                                                                                                                                                                                                                                                                                                                                                                                                                                                                                                                                                                                                                                                                                                                                                                                                                                                                                                                                                                                                                                                                                                                                                                                                                                                                                                                                                                                                                                                                                                                                                                                                                                                                                                                                                                                                                                                                                                                                                                                                                                                                                                                                                                      | 1.737002 | 4.141003 | 2.863368 | 1.801863 |   |   |     |          |  |  |  |  |     |          |          |  |  |  |      |          |          |          |  |  |     |          |          |          |          |  |     |          |          |          |          |          |      |          |          |          |          |          |     |          |          |          |          |          |      |          |          |          |          |          |     |          |          |          |          |          |      |          |          |          |          |          |      |          |          |          |          |          |       |          |          |          |          |          |  |   |   |   |   |    |      |          |  |  |  |  |     |          |          |  |  |  |      |          |          |          |  |  |     |          |          |          |          |  |      |          |          |          |          |          |      |          |          |          |          |          |       |          |          |          |          |          |  |    |    |  |  |  |      |          |  |  |  |  |       |          |          |  |  |  |
| 11 B                                                                                                                           | 1.788066                                                                                                                                                                                                                                                                                                                                                                                                                                                                                                                                                                                                                                                                                                                                                                                                                                                                                                                                                                                                                                                                                                                                                                                                                                                                                                                                                                                                                                                                                                                                                                                                                                                                                                                                                                                                                                                                                                                                                                                                                                                                                                                                                                                                                                                                                                                                                                                                                      | 2.950792 | 3.483424 | 1.753203 | 1.789862 |   |   |     |          |  |  |  |  |     |          |          |  |  |  |      |          |          |          |  |  |     |          |          |          |          |  |     |          |          |          |          |          |      |          |          |          |          |          |     |          |          |          |          |          |      |          |          |          |          |          |     |          |          |          |          |          |      |          |          |          |          |          |      |          |          |          |          |          |       |          |          |          |          |          |  |   |   |   |   |    |      |          |  |  |  |  |     |          |          |  |  |  |      |          |          |          |  |  |     |          |          |          |          |  |      |          |          |          |          |          |      |          |          |          |          |          |       |          |          |          |          |          |  |    |    |  |  |  |      |          |  |  |  |  |       |          |          |  |  |  |
| 12 B                                                                                                                           | 3.062024                                                                                                                                                                                                                                                                                                                                                                                                                                                                                                                                                                                                                                                                                                                                                                                                                                                                                                                                                                                                                                                                                                                                                                                                                                                                                                                                                                                                                                                                                                                                                                                                                                                                                                                                                                                                                                                                                                                                                                                                                                                                                                                                                                                                                                                                                                                                                                                                                      | 3.071577 | 2.066579 | 3.288088 | 3.680040 |   |   |     |          |  |  |  |  |     |          |          |  |  |  |      |          |          |          |  |  |     |          |          |          |          |  |     |          |          |          |          |          |      |          |          |          |          |          |     |          |          |          |          |          |      |          |          |          |          |          |     |          |          |          |          |          |      |          |          |          |          |          |      |          |          |          |          |          |       |          |          |          |          |          |  |   |   |   |   |    |      |          |  |  |  |  |     |          |          |  |  |  |      |          |          |          |  |  |     |          |          |          |          |  |      |          |          |          |          |          |      |          |          |          |          |          |       |          |          |          |          |          |  |    |    |  |  |  |      |          |  |  |  |  |       |          |          |  |  |  |
|                                                                                                                                | 6                                                                                                                                                                                                                                                                                                                                                                                                                                                                                                                                                                                                                                                                                                                                                                                                                                                                                                                                                                                                                                                                                                                                                                                                                                                                                                                                                                                                                                                                                                                                                                                                                                                                                                                                                                                                                                                                                                                                                                                                                                                                                                                                                                                                                                                                                                                                                                                                                             | 7        | 8        | 9        | 10       |   |   |     |          |  |  |  |  |     |          |          |  |  |  |      |          |          |          |  |  |     |          |          |          |          |  |     |          |          |          |          |          |      |          |          |          |          |          |     |          |          |          |          |          |      |          |          |          |          |          |     |          |          |          |          |          |      |          |          |          |          |          |      |          |          |          |          |          |       |          |          |          |          |          |  |   |   |   |   |    |      |          |  |  |  |  |     |          |          |  |  |  |      |          |          |          |  |  |     |          |          |          |          |  |      |          |          |          |          |          |      |          |          |          |          |          |       |          |          |          |          |          |  |    |    |  |  |  |      |          |  |  |  |  |       |          |          |  |  |  |
| 6 Ru                                                                                                                           | 0.000000                                                                                                                                                                                                                                                                                                                                                                                                                                                                                                                                                                                                                                                                                                                                                                                                                                                                                                                                                                                                                                                                                                                                                                                                                                                                                                                                                                                                                                                                                                                                                                                                                                                                                                                                                                                                                                                                                                                                                                                                                                                                                                                                                                                                                                                                                                                                                                                                                      |          |          |          |          |   |   |     |          |  |  |  |  |     |          |          |  |  |  |      |          |          |          |  |  |     |          |          |          |          |  |     |          |          |          |          |          |      |          |          |          |          |          |     |          |          |          |          |          |      |          |          |          |          |          |     |          |          |          |          |          |      |          |          |          |          |          |      |          |          |          |          |          |       |          |          |          |          |          |  |   |   |   |   |    |      |          |  |  |  |  |     |          |          |  |  |  |      |          |          |          |  |  |     |          |          |          |          |  |      |          |          |          |          |          |      |          |          |          |          |          |       |          |          |          |          |          |  |    |    |  |  |  |      |          |  |  |  |  |       |          |          |  |  |  |
| 7 B                                                                                                                            | 3.175715                                                                                                                                                                                                                                                                                                                                                                                                                                                                                                                                                                                                                                                                                                                                                                                                                                                                                                                                                                                                                                                                                                                                                                                                                                                                                                                                                                                                                                                                                                                                                                                                                                                                                                                                                                                                                                                                                                                                                                                                                                                                                                                                                                                                                                                                                                                                                                                                                      | 0.000000 |          |          |          |   |   |     |          |  |  |  |  |     |          |          |  |  |  |      |          |          |          |  |  |     |          |          |          |          |  |     |          |          |          |          |          |      |          |          |          |          |          |     |          |          |          |          |          |      |          |          |          |          |          |     |          |          |          |          |          |      |          |          |          |          |          |      |          |          |          |          |          |       |          |          |          |          |          |  |   |   |   |   |    |      |          |  |  |  |  |     |          |          |  |  |  |      |          |          |          |  |  |     |          |          |          |          |  |      |          |          |          |          |          |      |          |          |          |          |          |       |          |          |          |          |          |  |    |    |  |  |  |      |          |  |  |  |  |       |          |          |  |  |  |
| 8 B                                                                                                                            | 2.453810                                                                                                                                                                                                                                                                                                                                                                                                                                                                                                                                                                                                                                                                                                                                                                                                                                                                                                                                                                                                                                                                                                                                                                                                                                                                                                                                                                                                                                                                                                                                                                                                                                                                                                                                                                                                                                                                                                                                                                                                                                                                                                                                                                                                                                                                                                                                                                                                                      | 1.891199 | 0.000000 |          |          |   |   |     |          |  |  |  |  |     |          |          |  |  |  |      |          |          |          |  |  |     |          |          |          |          |  |     |          |          |          |          |          |      |          |          |          |          |          |     |          |          |          |          |          |      |          |          |          |          |          |     |          |          |          |          |          |      |          |          |          |          |          |      |          |          |          |          |          |       |          |          |          |          |          |  |   |   |   |   |    |      |          |  |  |  |  |     |          |          |  |  |  |      |          |          |          |  |  |     |          |          |          |          |  |      |          |          |          |          |          |      |          |          |          |          |          |       |          |          |          |          |          |  |    |    |  |  |  |      |          |  |  |  |  |       |          |          |  |  |  |
| 9 B                                                                                                                            | 3.569365                                                                                                                                                                                                                                                                                                                                                                                                                                                                                                                                                                                                                                                                                                                                                                                                                                                                                                                                                                                                                                                                                                                                                                                                                                                                                                                                                                                                                                                                                                                                                                                                                                                                                                                                                                                                                                                                                                                                                                                                                                                                                                                                                                                                                                                                                                                                                                                                                      | 1.722694 | 1.860682 | 0.000000 |          |   |   |     |          |  |  |  |  |     |          |          |  |  |  |      |          |          |          |  |  |     |          |          |          |          |  |     |          |          |          |          |          |      |          |          |          |          |          |     |          |          |          |          |          |      |          |          |          |          |          |     |          |          |          |          |          |      |          |          |          |          |          |      |          |          |          |          |          |       |          |          |          |          |          |  |   |   |   |   |    |      |          |  |  |  |  |     |          |          |  |  |  |      |          |          |          |  |  |     |          |          |          |          |  |      |          |          |          |          |          |      |          |          |          |          |          |       |          |          |          |          |          |  |    |    |  |  |  |      |          |  |  |  |  |       |          |          |  |  |  |
| 10 B                                                                                                                           | 3.154281                                                                                                                                                                                                                                                                                                                                                                                                                                                                                                                                                                                                                                                                                                                                                                                                                                                                                                                                                                                                                                                                                                                                                                                                                                                                                                                                                                                                                                                                                                                                                                                                                                                                                                                                                                                                                                                                                                                                                                                                                                                                                                                                                                                                                                                                                                                                                                                                                      | 3.042405 | 1.946240 | 1.740865 | 0.000000 |   |   |     |          |  |  |  |  |     |          |          |  |  |  |      |          |          |          |  |  |     |          |          |          |          |  |     |          |          |          |          |          |      |          |          |          |          |          |     |          |          |          |          |          |      |          |          |          |          |          |     |          |          |          |          |          |      |          |          |          |          |          |      |          |          |          |          |          |       |          |          |          |          |          |  |   |   |   |   |    |      |          |  |  |  |  |     |          |          |  |  |  |      |          |          |          |  |  |     |          |          |          |          |  |      |          |          |          |          |          |      |          |          |          |          |          |       |          |          |          |          |          |  |    |    |  |  |  |      |          |  |  |  |  |       |          |          |  |  |  |
| 11 B                                                                                                                           | 3.376738                                                                                                                                                                                                                                                                                                                                                                                                                                                                                                                                                                                                                                                                                                                                                                                                                                                                                                                                                                                                                                                                                                                                                                                                                                                                                                                                                                                                                                                                                                                                                                                                                                                                                                                                                                                                                                                                                                                                                                                                                                                                                                                                                                                                                                                                                                                                                                                                                      | 2.909525 | 2.888319 | 1.797117 | 1.762920 |   |   |     |          |  |  |  |  |     |          |          |  |  |  |      |          |          |          |  |  |     |          |          |          |          |  |     |          |          |          |          |          |      |          |          |          |          |          |     |          |          |          |          |          |      |          |          |          |          |          |     |          |          |          |          |          |      |          |          |          |          |          |      |          |          |          |          |          |       |          |          |          |          |          |  |   |   |   |   |    |      |          |  |  |  |  |     |          |          |  |  |  |      |          |          |          |  |  |     |          |          |          |          |  |      |          |          |          |          |          |      |          |          |          |          |          |       |          |          |          |          |          |  |    |    |  |  |  |      |          |  |  |  |  |       |          |          |  |  |  |
| 12 B                                                                                                                           | 2.182602                                                                                                                                                                                                                                                                                                                                                                                                                                                                                                                                                                                                                                                                                                                                                                                                                                                                                                                                                                                                                                                                                                                                                                                                                                                                                                                                                                                                                                                                                                                                                                                                                                                                                                                                                                                                                                                                                                                                                                                                                                                                                                                                                                                                                                                                                                                                                                                                                      | 1.802175 | 1.873829 | 3.059178 | 3.594331 |   |   |     |          |  |  |  |  |     |          |          |  |  |  |      |          |          |          |  |  |     |          |          |          |          |  |     |          |          |          |          |          |      |          |          |          |          |          |     |          |          |          |          |          |      |          |          |          |          |          |     |          |          |          |          |          |      |          |          |          |          |          |      |          |          |          |          |          |       |          |          |          |          |          |  |   |   |   |   |    |      |          |  |  |  |  |     |          |          |  |  |  |      |          |          |          |  |  |     |          |          |          |          |  |      |          |          |          |          |          |      |          |          |          |          |          |       |          |          |          |          |          |  |    |    |  |  |  |      |          |  |  |  |  |       |          |          |  |  |  |
|                                                                                                                                | 11                                                                                                                                                                                                                                                                                                                                                                                                                                                                                                                                                                                                                                                                                                                                                                                                                                                                                                                                                                                                                                                                                                                                                                                                                                                                                                                                                                                                                                                                                                                                                                                                                                                                                                                                                                                                                                                                                                                                                                                                                                                                                                                                                                                                                                                                                                                                                                                                                            | 12       |          |          |          |   |   |     |          |  |  |  |  |     |          |          |  |  |  |      |          |          |          |  |  |     |          |          |          |          |  |     |          |          |          |          |          |      |          |          |          |          |          |     |          |          |          |          |          |      |          |          |          |          |          |     |          |          |          |          |          |      |          |          |          |          |          |      |          |          |          |          |          |       |          |          |          |          |          |  |   |   |   |   |    |      |          |  |  |  |  |     |          |          |  |  |  |      |          |          |          |  |  |     |          |          |          |          |  |      |          |          |          |          |          |      |          |          |          |          |          |       |          |          |          |          |          |  |    |    |  |  |  |      |          |  |  |  |  |       |          |          |  |  |  |
| 11 B                                                                                                                           | 0.000000                                                                                                                                                                                                                                                                                                                                                                                                                                                                                                                                                                                                                                                                                                                                                                                                                                                                                                                                                                                                                                                                                                                                                                                                                                                                                                                                                                                                                                                                                                                                                                                                                                                                                                                                                                                                                                                                                                                                                                                                                                                                                                                                                                                                                                                                                                                                                                                                                      |          |          |          |          |   |   |     |          |  |  |  |  |     |          |          |  |  |  |      |          |          |          |  |  |     |          |          |          |          |  |     |          |          |          |          |          |      |          |          |          |          |          |     |          |          |          |          |          |      |          |          |          |          |          |     |          |          |          |          |          |      |          |          |          |          |          |      |          |          |          |          |          |       |          |          |          |          |          |  |   |   |   |   |    |      |          |  |  |  |  |     |          |          |  |  |  |      |          |          |          |  |  |     |          |          |          |          |  |      |          |          |          |          |          |      |          |          |          |          |          |       |          |          |          |          |          |  |    |    |  |  |  |      |          |  |  |  |  |       |          |          |  |  |  |
| 12 B                                                                                                                           | 3.875467                                                                                                                                                                                                                                                                                                                                                                                                                                                                                                                                                                                                                                                                                                                                                                                                                                                                                                                                                                                                                                                                                                                                                                                                                                                                                                                                                                                                                                                                                                                                                                                                                                                                                                                                                                                                                                                                                                                                                                                                                                                                                                                                                                                                                                                                                                                                                                                                                      | 0.000000 |          |          |          |   |   |     |          |  |  |  |  |     |          |          |  |  |  |      |          |          |          |  |  |     |          |          |          |          |  |     |          |          |          |          |          |      |          |          |          |          |          |     |          |          |          |          |          |      |          |          |          |          |          |     |          |          |          |          |          |      |          |          |          |          |          |      |          |          |          |          |          |       |          |          |          |          |          |  |   |   |   |   |    |      |          |  |  |  |  |     |          |          |  |  |  |      |          |          |          |  |  |     |          |          |          |          |  |      |          |          |          |          |          |      |          |          |          |          |          |       |          |          |          |          |          |  |    |    |  |  |  |      |          |  |  |  |  |       |          |          |  |  |  |
|  <p>8. -831.59410049 +31.4 C<sub>s</sub></p> | <table border="1"> <thead> <tr> <th></th> <th>1</th> <th>2</th> <th>3</th> <th>4</th> <th>5</th> </tr> </thead> <tbody> <tr><td>1 B</td><td>0.000000</td><td></td><td></td><td></td><td></td></tr> <tr><td>2 B</td><td>2.900521</td><td>0.000000</td><td></td><td></td><td></td></tr> <tr><td>3 B</td><td>1.790275</td><td>1.789790</td><td>0.000000</td><td></td><td></td></tr> <tr><td>4 B</td><td>1.828703</td><td>1.734929</td><td>1.787969</td><td>0.000000</td><td></td></tr> <tr><td>5 B</td><td>3.670105</td><td>1.734929</td><td>2.953245</td><td>3.022000</td><td>0.000000</td></tr> <tr><td>6 B</td><td>3.054612</td><td>1.789790</td><td>1.828200</td><td>2.953245</td><td>1.787969</td></tr> <tr><td>7 B</td><td>2.837771</td><td>1.850137</td><td>2.882666</td><td>1.877179</td><td>1.877179</td></tr> <tr><td>8 Ru</td><td>2.177163</td><td>3.329157</td><td>2.190512</td><td>3.384149</td><td>3.384149</td></tr> <tr><td>9 B</td><td>1.801672</td><td>3.018619</td><td>2.965970</td><td>1.753690</td><td>3.504432</td></tr> <tr><td>10 B</td><td>3.667781</td><td>3.018619</td><td>3.790256</td><td>3.504432</td><td>1.753690</td></tr> <tr><td>11 B</td><td>3.350600</td><td>2.900521</td><td>3.054612</td><td>3.670105</td><td>1.828703</td></tr> <tr><td>12 Ru</td><td>2.347849</td><td>3.505881</td><td>3.347198</td><td>3.100298</td><td>3.100298</td></tr> <tr> <td></td> <td>6</td> <td>7</td> <td>8</td> <td>9</td> <td>10</td> </tr> <tr><td>6 B</td><td>0.000000</td><td></td><td></td><td></td><td></td></tr> <tr><td>7 B</td><td>2.882666</td><td>0.000000</td><td></td><td></td><td></td></tr> <tr><td>8 Ru</td><td>2.190512</td><td>3.665946</td><td>0.000000</td><td></td><td></td></tr> <tr><td>9 B</td><td>3.790256</td><td>1.903185</td><td>3.493588</td><td>0.000000</td><td></td></tr> <tr><td>10 B</td><td>2.965970</td><td>1.903185</td><td>3.493588</td><td>3.046200</td><td>0.000000</td></tr> <tr><td>11 B</td><td>1.790275</td><td>2.837771</td><td>2.177163</td><td>3.667781</td><td>1.801672</td></tr> <tr><td>12 Ru</td><td>3.347198</td><td>2.422584</td><td>2.587724</td><td>2.010440</td><td>2.010440</td></tr> <tr> <td></td> <td>11</td> <td>12</td> <td></td> <td></td> <td></td> </tr> <tr><td>11 B</td><td>0.000000</td><td></td><td></td><td></td><td></td></tr> <tr><td>12 Ru</td><td>2.347849</td><td>0.000000</td><td></td><td></td><td></td></tr> </tbody> </table> |          | 1        | 2        | 3        | 4 | 5 | 1 B | 0.000000 |  |  |  |  | 2 B | 2.900521 | 0.000000 |  |  |  | 3 B  | 1.790275 | 1.789790 | 0.000000 |  |  | 4 B | 1.828703 | 1.734929 | 1.787969 | 0.000000 |  | 5 B | 3.670105 | 1.734929 | 2.953245 | 3.022000 | 0.000000 | 6 B  | 3.054612 | 1.789790 | 1.828200 | 2.953245 | 1.787969 | 7 B | 2.837771 | 1.850137 | 2.882666 | 1.877179 | 1.877179 | 8 Ru | 2.177163 | 3.329157 | 2.190512 | 3.384149 | 3.384149 | 9 B | 1.801672 | 3.018619 | 2.965970 | 1.753690 | 3.504432 | 10 B | 3.667781 | 3.018619 | 3.790256 | 3.504432 | 1.753690 | 11 B | 3.350600 | 2.900521 | 3.054612 | 3.670105 | 1.828703 | 12 Ru | 2.347849 | 3.505881 | 3.347198 | 3.100298 | 3.100298 |  | 6 | 7 | 8 | 9 | 10 | 6 B  | 0.000000 |  |  |  |  | 7 B | 2.882666 | 0.000000 |  |  |  | 8 Ru | 2.190512 | 3.665946 | 0.000000 |  |  | 9 B | 3.790256 | 1.903185 | 3.493588 | 0.000000 |  | 10 B | 2.965970 | 1.903185 | 3.493588 | 3.046200 | 0.000000 | 11 B | 1.790275 | 2.837771 | 2.177163 | 3.667781 | 1.801672 | 12 Ru | 3.347198 | 2.422584 | 2.587724 | 2.010440 | 2.010440 |  | 11 | 12 |  |  |  | 11 B | 0.000000 |  |  |  |  | 12 Ru | 2.347849 | 0.000000 |  |  |  |
|                                                                                                                                | 1                                                                                                                                                                                                                                                                                                                                                                                                                                                                                                                                                                                                                                                                                                                                                                                                                                                                                                                                                                                                                                                                                                                                                                                                                                                                                                                                                                                                                                                                                                                                                                                                                                                                                                                                                                                                                                                                                                                                                                                                                                                                                                                                                                                                                                                                                                                                                                                                                             | 2        | 3        | 4        | 5        |   |   |     |          |  |  |  |  |     |          |          |  |  |  |      |          |          |          |  |  |     |          |          |          |          |  |     |          |          |          |          |          |      |          |          |          |          |          |     |          |          |          |          |          |      |          |          |          |          |          |     |          |          |          |          |          |      |          |          |          |          |          |      |          |          |          |          |          |       |          |          |          |          |          |  |   |   |   |   |    |      |          |  |  |  |  |     |          |          |  |  |  |      |          |          |          |  |  |     |          |          |          |          |  |      |          |          |          |          |          |      |          |          |          |          |          |       |          |          |          |          |          |  |    |    |  |  |  |      |          |  |  |  |  |       |          |          |  |  |  |
| 1 B                                                                                                                            | 0.000000                                                                                                                                                                                                                                                                                                                                                                                                                                                                                                                                                                                                                                                                                                                                                                                                                                                                                                                                                                                                                                                                                                                                                                                                                                                                                                                                                                                                                                                                                                                                                                                                                                                                                                                                                                                                                                                                                                                                                                                                                                                                                                                                                                                                                                                                                                                                                                                                                      |          |          |          |          |   |   |     |          |  |  |  |  |     |          |          |  |  |  |      |          |          |          |  |  |     |          |          |          |          |  |     |          |          |          |          |          |      |          |          |          |          |          |     |          |          |          |          |          |      |          |          |          |          |          |     |          |          |          |          |          |      |          |          |          |          |          |      |          |          |          |          |          |       |          |          |          |          |          |  |   |   |   |   |    |      |          |  |  |  |  |     |          |          |  |  |  |      |          |          |          |  |  |     |          |          |          |          |  |      |          |          |          |          |          |      |          |          |          |          |          |       |          |          |          |          |          |  |    |    |  |  |  |      |          |  |  |  |  |       |          |          |  |  |  |
| 2 B                                                                                                                            | 2.900521                                                                                                                                                                                                                                                                                                                                                                                                                                                                                                                                                                                                                                                                                                                                                                                                                                                                                                                                                                                                                                                                                                                                                                                                                                                                                                                                                                                                                                                                                                                                                                                                                                                                                                                                                                                                                                                                                                                                                                                                                                                                                                                                                                                                                                                                                                                                                                                                                      | 0.000000 |          |          |          |   |   |     |          |  |  |  |  |     |          |          |  |  |  |      |          |          |          |  |  |     |          |          |          |          |  |     |          |          |          |          |          |      |          |          |          |          |          |     |          |          |          |          |          |      |          |          |          |          |          |     |          |          |          |          |          |      |          |          |          |          |          |      |          |          |          |          |          |       |          |          |          |          |          |  |   |   |   |   |    |      |          |  |  |  |  |     |          |          |  |  |  |      |          |          |          |  |  |     |          |          |          |          |  |      |          |          |          |          |          |      |          |          |          |          |          |       |          |          |          |          |          |  |    |    |  |  |  |      |          |  |  |  |  |       |          |          |  |  |  |
| 3 B                                                                                                                            | 1.790275                                                                                                                                                                                                                                                                                                                                                                                                                                                                                                                                                                                                                                                                                                                                                                                                                                                                                                                                                                                                                                                                                                                                                                                                                                                                                                                                                                                                                                                                                                                                                                                                                                                                                                                                                                                                                                                                                                                                                                                                                                                                                                                                                                                                                                                                                                                                                                                                                      | 1.789790 | 0.000000 |          |          |   |   |     |          |  |  |  |  |     |          |          |  |  |  |      |          |          |          |  |  |     |          |          |          |          |  |     |          |          |          |          |          |      |          |          |          |          |          |     |          |          |          |          |          |      |          |          |          |          |          |     |          |          |          |          |          |      |          |          |          |          |          |      |          |          |          |          |          |       |          |          |          |          |          |  |   |   |   |   |    |      |          |  |  |  |  |     |          |          |  |  |  |      |          |          |          |  |  |     |          |          |          |          |  |      |          |          |          |          |          |      |          |          |          |          |          |       |          |          |          |          |          |  |    |    |  |  |  |      |          |  |  |  |  |       |          |          |  |  |  |
| 4 B                                                                                                                            | 1.828703                                                                                                                                                                                                                                                                                                                                                                                                                                                                                                                                                                                                                                                                                                                                                                                                                                                                                                                                                                                                                                                                                                                                                                                                                                                                                                                                                                                                                                                                                                                                                                                                                                                                                                                                                                                                                                                                                                                                                                                                                                                                                                                                                                                                                                                                                                                                                                                                                      | 1.734929 | 1.787969 | 0.000000 |          |   |   |     |          |  |  |  |  |     |          |          |  |  |  |      |          |          |          |  |  |     |          |          |          |          |  |     |          |          |          |          |          |      |          |          |          |          |          |     |          |          |          |          |          |      |          |          |          |          |          |     |          |          |          |          |          |      |          |          |          |          |          |      |          |          |          |          |          |       |          |          |          |          |          |  |   |   |   |   |    |      |          |  |  |  |  |     |          |          |  |  |  |      |          |          |          |  |  |     |          |          |          |          |  |      |          |          |          |          |          |      |          |          |          |          |          |       |          |          |          |          |          |  |    |    |  |  |  |      |          |  |  |  |  |       |          |          |  |  |  |
| 5 B                                                                                                                            | 3.670105                                                                                                                                                                                                                                                                                                                                                                                                                                                                                                                                                                                                                                                                                                                                                                                                                                                                                                                                                                                                                                                                                                                                                                                                                                                                                                                                                                                                                                                                                                                                                                                                                                                                                                                                                                                                                                                                                                                                                                                                                                                                                                                                                                                                                                                                                                                                                                                                                      | 1.734929 | 2.953245 | 3.022000 | 0.000000 |   |   |     |          |  |  |  |  |     |          |          |  |  |  |      |          |          |          |  |  |     |          |          |          |          |  |     |          |          |          |          |          |      |          |          |          |          |          |     |          |          |          |          |          |      |          |          |          |          |          |     |          |          |          |          |          |      |          |          |          |          |          |      |          |          |          |          |          |       |          |          |          |          |          |  |   |   |   |   |    |      |          |  |  |  |  |     |          |          |  |  |  |      |          |          |          |  |  |     |          |          |          |          |  |      |          |          |          |          |          |      |          |          |          |          |          |       |          |          |          |          |          |  |    |    |  |  |  |      |          |  |  |  |  |       |          |          |  |  |  |
| 6 B                                                                                                                            | 3.054612                                                                                                                                                                                                                                                                                                                                                                                                                                                                                                                                                                                                                                                                                                                                                                                                                                                                                                                                                                                                                                                                                                                                                                                                                                                                                                                                                                                                                                                                                                                                                                                                                                                                                                                                                                                                                                                                                                                                                                                                                                                                                                                                                                                                                                                                                                                                                                                                                      | 1.789790 | 1.828200 | 2.953245 | 1.787969 |   |   |     |          |  |  |  |  |     |          |          |  |  |  |      |          |          |          |  |  |     |          |          |          |          |  |     |          |          |          |          |          |      |          |          |          |          |          |     |          |          |          |          |          |      |          |          |          |          |          |     |          |          |          |          |          |      |          |          |          |          |          |      |          |          |          |          |          |       |          |          |          |          |          |  |   |   |   |   |    |      |          |  |  |  |  |     |          |          |  |  |  |      |          |          |          |  |  |     |          |          |          |          |  |      |          |          |          |          |          |      |          |          |          |          |          |       |          |          |          |          |          |  |    |    |  |  |  |      |          |  |  |  |  |       |          |          |  |  |  |
| 7 B                                                                                                                            | 2.837771                                                                                                                                                                                                                                                                                                                                                                                                                                                                                                                                                                                                                                                                                                                                                                                                                                                                                                                                                                                                                                                                                                                                                                                                                                                                                                                                                                                                                                                                                                                                                                                                                                                                                                                                                                                                                                                                                                                                                                                                                                                                                                                                                                                                                                                                                                                                                                                                                      | 1.850137 | 2.882666 | 1.877179 | 1.877179 |   |   |     |          |  |  |  |  |     |          |          |  |  |  |      |          |          |          |  |  |     |          |          |          |          |  |     |          |          |          |          |          |      |          |          |          |          |          |     |          |          |          |          |          |      |          |          |          |          |          |     |          |          |          |          |          |      |          |          |          |          |          |      |          |          |          |          |          |       |          |          |          |          |          |  |   |   |   |   |    |      |          |  |  |  |  |     |          |          |  |  |  |      |          |          |          |  |  |     |          |          |          |          |  |      |          |          |          |          |          |      |          |          |          |          |          |       |          |          |          |          |          |  |    |    |  |  |  |      |          |  |  |  |  |       |          |          |  |  |  |
| 8 Ru                                                                                                                           | 2.177163                                                                                                                                                                                                                                                                                                                                                                                                                                                                                                                                                                                                                                                                                                                                                                                                                                                                                                                                                                                                                                                                                                                                                                                                                                                                                                                                                                                                                                                                                                                                                                                                                                                                                                                                                                                                                                                                                                                                                                                                                                                                                                                                                                                                                                                                                                                                                                                                                      | 3.329157 | 2.190512 | 3.384149 | 3.384149 |   |   |     |          |  |  |  |  |     |          |          |  |  |  |      |          |          |          |  |  |     |          |          |          |          |  |     |          |          |          |          |          |      |          |          |          |          |          |     |          |          |          |          |          |      |          |          |          |          |          |     |          |          |          |          |          |      |          |          |          |          |          |      |          |          |          |          |          |       |          |          |          |          |          |  |   |   |   |   |    |      |          |  |  |  |  |     |          |          |  |  |  |      |          |          |          |  |  |     |          |          |          |          |  |      |          |          |          |          |          |      |          |          |          |          |          |       |          |          |          |          |          |  |    |    |  |  |  |      |          |  |  |  |  |       |          |          |  |  |  |
| 9 B                                                                                                                            | 1.801672                                                                                                                                                                                                                                                                                                                                                                                                                                                                                                                                                                                                                                                                                                                                                                                                                                                                                                                                                                                                                                                                                                                                                                                                                                                                                                                                                                                                                                                                                                                                                                                                                                                                                                                                                                                                                                                                                                                                                                                                                                                                                                                                                                                                                                                                                                                                                                                                                      | 3.018619 | 2.965970 | 1.753690 | 3.504432 |   |   |     |          |  |  |  |  |     |          |          |  |  |  |      |          |          |          |  |  |     |          |          |          |          |  |     |          |          |          |          |          |      |          |          |          |          |          |     |          |          |          |          |          |      |          |          |          |          |          |     |          |          |          |          |          |      |          |          |          |          |          |      |          |          |          |          |          |       |          |          |          |          |          |  |   |   |   |   |    |      |          |  |  |  |  |     |          |          |  |  |  |      |          |          |          |  |  |     |          |          |          |          |  |      |          |          |          |          |          |      |          |          |          |          |          |       |          |          |          |          |          |  |    |    |  |  |  |      |          |  |  |  |  |       |          |          |  |  |  |
| 10 B                                                                                                                           | 3.667781                                                                                                                                                                                                                                                                                                                                                                                                                                                                                                                                                                                                                                                                                                                                                                                                                                                                                                                                                                                                                                                                                                                                                                                                                                                                                                                                                                                                                                                                                                                                                                                                                                                                                                                                                                                                                                                                                                                                                                                                                                                                                                                                                                                                                                                                                                                                                                                                                      | 3.018619 | 3.790256 | 3.504432 | 1.753690 |   |   |     |          |  |  |  |  |     |          |          |  |  |  |      |          |          |          |  |  |     |          |          |          |          |  |     |          |          |          |          |          |      |          |          |          |          |          |     |          |          |          |          |          |      |          |          |          |          |          |     |          |          |          |          |          |      |          |          |          |          |          |      |          |          |          |          |          |       |          |          |          |          |          |  |   |   |   |   |    |      |          |  |  |  |  |     |          |          |  |  |  |      |          |          |          |  |  |     |          |          |          |          |  |      |          |          |          |          |          |      |          |          |          |          |          |       |          |          |          |          |          |  |    |    |  |  |  |      |          |  |  |  |  |       |          |          |  |  |  |
| 11 B                                                                                                                           | 3.350600                                                                                                                                                                                                                                                                                                                                                                                                                                                                                                                                                                                                                                                                                                                                                                                                                                                                                                                                                                                                                                                                                                                                                                                                                                                                                                                                                                                                                                                                                                                                                                                                                                                                                                                                                                                                                                                                                                                                                                                                                                                                                                                                                                                                                                                                                                                                                                                                                      | 2.900521 | 3.054612 | 3.670105 | 1.828703 |   |   |     |          |  |  |  |  |     |          |          |  |  |  |      |          |          |          |  |  |     |          |          |          |          |  |     |          |          |          |          |          |      |          |          |          |          |          |     |          |          |          |          |          |      |          |          |          |          |          |     |          |          |          |          |          |      |          |          |          |          |          |      |          |          |          |          |          |       |          |          |          |          |          |  |   |   |   |   |    |      |          |  |  |  |  |     |          |          |  |  |  |      |          |          |          |  |  |     |          |          |          |          |  |      |          |          |          |          |          |      |          |          |          |          |          |       |          |          |          |          |          |  |    |    |  |  |  |      |          |  |  |  |  |       |          |          |  |  |  |
| 12 Ru                                                                                                                          | 2.347849                                                                                                                                                                                                                                                                                                                                                                                                                                                                                                                                                                                                                                                                                                                                                                                                                                                                                                                                                                                                                                                                                                                                                                                                                                                                                                                                                                                                                                                                                                                                                                                                                                                                                                                                                                                                                                                                                                                                                                                                                                                                                                                                                                                                                                                                                                                                                                                                                      | 3.505881 | 3.347198 | 3.100298 | 3.100298 |   |   |     |          |  |  |  |  |     |          |          |  |  |  |      |          |          |          |  |  |     |          |          |          |          |  |     |          |          |          |          |          |      |          |          |          |          |          |     |          |          |          |          |          |      |          |          |          |          |          |     |          |          |          |          |          |      |          |          |          |          |          |      |          |          |          |          |          |       |          |          |          |          |          |  |   |   |   |   |    |      |          |  |  |  |  |     |          |          |  |  |  |      |          |          |          |  |  |     |          |          |          |          |  |      |          |          |          |          |          |      |          |          |          |          |          |       |          |          |          |          |          |  |    |    |  |  |  |      |          |  |  |  |  |       |          |          |  |  |  |
|                                                                                                                                | 6                                                                                                                                                                                                                                                                                                                                                                                                                                                                                                                                                                                                                                                                                                                                                                                                                                                                                                                                                                                                                                                                                                                                                                                                                                                                                                                                                                                                                                                                                                                                                                                                                                                                                                                                                                                                                                                                                                                                                                                                                                                                                                                                                                                                                                                                                                                                                                                                                             | 7        | 8        | 9        | 10       |   |   |     |          |  |  |  |  |     |          |          |  |  |  |      |          |          |          |  |  |     |          |          |          |          |  |     |          |          |          |          |          |      |          |          |          |          |          |     |          |          |          |          |          |      |          |          |          |          |          |     |          |          |          |          |          |      |          |          |          |          |          |      |          |          |          |          |          |       |          |          |          |          |          |  |   |   |   |   |    |      |          |  |  |  |  |     |          |          |  |  |  |      |          |          |          |  |  |     |          |          |          |          |  |      |          |          |          |          |          |      |          |          |          |          |          |       |          |          |          |          |          |  |    |    |  |  |  |      |          |  |  |  |  |       |          |          |  |  |  |
| 6 B                                                                                                                            | 0.000000                                                                                                                                                                                                                                                                                                                                                                                                                                                                                                                                                                                                                                                                                                                                                                                                                                                                                                                                                                                                                                                                                                                                                                                                                                                                                                                                                                                                                                                                                                                                                                                                                                                                                                                                                                                                                                                                                                                                                                                                                                                                                                                                                                                                                                                                                                                                                                                                                      |          |          |          |          |   |   |     |          |  |  |  |  |     |          |          |  |  |  |      |          |          |          |  |  |     |          |          |          |          |  |     |          |          |          |          |          |      |          |          |          |          |          |     |          |          |          |          |          |      |          |          |          |          |          |     |          |          |          |          |          |      |          |          |          |          |          |      |          |          |          |          |          |       |          |          |          |          |          |  |   |   |   |   |    |      |          |  |  |  |  |     |          |          |  |  |  |      |          |          |          |  |  |     |          |          |          |          |  |      |          |          |          |          |          |      |          |          |          |          |          |       |          |          |          |          |          |  |    |    |  |  |  |      |          |  |  |  |  |       |          |          |  |  |  |
| 7 B                                                                                                                            | 2.882666                                                                                                                                                                                                                                                                                                                                                                                                                                                                                                                                                                                                                                                                                                                                                                                                                                                                                                                                                                                                                                                                                                                                                                                                                                                                                                                                                                                                                                                                                                                                                                                                                                                                                                                                                                                                                                                                                                                                                                                                                                                                                                                                                                                                                                                                                                                                                                                                                      | 0.000000 |          |          |          |   |   |     |          |  |  |  |  |     |          |          |  |  |  |      |          |          |          |  |  |     |          |          |          |          |  |     |          |          |          |          |          |      |          |          |          |          |          |     |          |          |          |          |          |      |          |          |          |          |          |     |          |          |          |          |          |      |          |          |          |          |          |      |          |          |          |          |          |       |          |          |          |          |          |  |   |   |   |   |    |      |          |  |  |  |  |     |          |          |  |  |  |      |          |          |          |  |  |     |          |          |          |          |  |      |          |          |          |          |          |      |          |          |          |          |          |       |          |          |          |          |          |  |    |    |  |  |  |      |          |  |  |  |  |       |          |          |  |  |  |
| 8 Ru                                                                                                                           | 2.190512                                                                                                                                                                                                                                                                                                                                                                                                                                                                                                                                                                                                                                                                                                                                                                                                                                                                                                                                                                                                                                                                                                                                                                                                                                                                                                                                                                                                                                                                                                                                                                                                                                                                                                                                                                                                                                                                                                                                                                                                                                                                                                                                                                                                                                                                                                                                                                                                                      | 3.665946 | 0.000000 |          |          |   |   |     |          |  |  |  |  |     |          |          |  |  |  |      |          |          |          |  |  |     |          |          |          |          |  |     |          |          |          |          |          |      |          |          |          |          |          |     |          |          |          |          |          |      |          |          |          |          |          |     |          |          |          |          |          |      |          |          |          |          |          |      |          |          |          |          |          |       |          |          |          |          |          |  |   |   |   |   |    |      |          |  |  |  |  |     |          |          |  |  |  |      |          |          |          |  |  |     |          |          |          |          |  |      |          |          |          |          |          |      |          |          |          |          |          |       |          |          |          |          |          |  |    |    |  |  |  |      |          |  |  |  |  |       |          |          |  |  |  |
| 9 B                                                                                                                            | 3.790256                                                                                                                                                                                                                                                                                                                                                                                                                                                                                                                                                                                                                                                                                                                                                                                                                                                                                                                                                                                                                                                                                                                                                                                                                                                                                                                                                                                                                                                                                                                                                                                                                                                                                                                                                                                                                                                                                                                                                                                                                                                                                                                                                                                                                                                                                                                                                                                                                      | 1.903185 | 3.493588 | 0.000000 |          |   |   |     |          |  |  |  |  |     |          |          |  |  |  |      |          |          |          |  |  |     |          |          |          |          |  |     |          |          |          |          |          |      |          |          |          |          |          |     |          |          |          |          |          |      |          |          |          |          |          |     |          |          |          |          |          |      |          |          |          |          |          |      |          |          |          |          |          |       |          |          |          |          |          |  |   |   |   |   |    |      |          |  |  |  |  |     |          |          |  |  |  |      |          |          |          |  |  |     |          |          |          |          |  |      |          |          |          |          |          |      |          |          |          |          |          |       |          |          |          |          |          |  |    |    |  |  |  |      |          |  |  |  |  |       |          |          |  |  |  |
| 10 B                                                                                                                           | 2.965970                                                                                                                                                                                                                                                                                                                                                                                                                                                                                                                                                                                                                                                                                                                                                                                                                                                                                                                                                                                                                                                                                                                                                                                                                                                                                                                                                                                                                                                                                                                                                                                                                                                                                                                                                                                                                                                                                                                                                                                                                                                                                                                                                                                                                                                                                                                                                                                                                      | 1.903185 | 3.493588 | 3.046200 | 0.000000 |   |   |     |          |  |  |  |  |     |          |          |  |  |  |      |          |          |          |  |  |     |          |          |          |          |  |     |          |          |          |          |          |      |          |          |          |          |          |     |          |          |          |          |          |      |          |          |          |          |          |     |          |          |          |          |          |      |          |          |          |          |          |      |          |          |          |          |          |       |          |          |          |          |          |  |   |   |   |   |    |      |          |  |  |  |  |     |          |          |  |  |  |      |          |          |          |  |  |     |          |          |          |          |  |      |          |          |          |          |          |      |          |          |          |          |          |       |          |          |          |          |          |  |    |    |  |  |  |      |          |  |  |  |  |       |          |          |  |  |  |
| 11 B                                                                                                                           | 1.790275                                                                                                                                                                                                                                                                                                                                                                                                                                                                                                                                                                                                                                                                                                                                                                                                                                                                                                                                                                                                                                                                                                                                                                                                                                                                                                                                                                                                                                                                                                                                                                                                                                                                                                                                                                                                                                                                                                                                                                                                                                                                                                                                                                                                                                                                                                                                                                                                                      | 2.837771 | 2.177163 | 3.667781 | 1.801672 |   |   |     |          |  |  |  |  |     |          |          |  |  |  |      |          |          |          |  |  |     |          |          |          |          |  |     |          |          |          |          |          |      |          |          |          |          |          |     |          |          |          |          |          |      |          |          |          |          |          |     |          |          |          |          |          |      |          |          |          |          |          |      |          |          |          |          |          |       |          |          |          |          |          |  |   |   |   |   |    |      |          |  |  |  |  |     |          |          |  |  |  |      |          |          |          |  |  |     |          |          |          |          |  |      |          |          |          |          |          |      |          |          |          |          |          |       |          |          |          |          |          |  |    |    |  |  |  |      |          |  |  |  |  |       |          |          |  |  |  |
| 12 Ru                                                                                                                          | 3.347198                                                                                                                                                                                                                                                                                                                                                                                                                                                                                                                                                                                                                                                                                                                                                                                                                                                                                                                                                                                                                                                                                                                                                                                                                                                                                                                                                                                                                                                                                                                                                                                                                                                                                                                                                                                                                                                                                                                                                                                                                                                                                                                                                                                                                                                                                                                                                                                                                      | 2.422584 | 2.587724 | 2.010440 | 2.010440 |   |   |     |          |  |  |  |  |     |          |          |  |  |  |      |          |          |          |  |  |     |          |          |          |          |  |     |          |          |          |          |          |      |          |          |          |          |          |     |          |          |          |          |          |      |          |          |          |          |          |     |          |          |          |          |          |      |          |          |          |          |          |      |          |          |          |          |          |       |          |          |          |          |          |  |   |   |   |   |    |      |          |  |  |  |  |     |          |          |  |  |  |      |          |          |          |  |  |     |          |          |          |          |  |      |          |          |          |          |          |      |          |          |          |          |          |       |          |          |          |          |          |  |    |    |  |  |  |      |          |  |  |  |  |       |          |          |  |  |  |
|                                                                                                                                | 11                                                                                                                                                                                                                                                                                                                                                                                                                                                                                                                                                                                                                                                                                                                                                                                                                                                                                                                                                                                                                                                                                                                                                                                                                                                                                                                                                                                                                                                                                                                                                                                                                                                                                                                                                                                                                                                                                                                                                                                                                                                                                                                                                                                                                                                                                                                                                                                                                            | 12       |          |          |          |   |   |     |          |  |  |  |  |     |          |          |  |  |  |      |          |          |          |  |  |     |          |          |          |          |  |     |          |          |          |          |          |      |          |          |          |          |          |     |          |          |          |          |          |      |          |          |          |          |          |     |          |          |          |          |          |      |          |          |          |          |          |      |          |          |          |          |          |       |          |          |          |          |          |  |   |   |   |   |    |      |          |  |  |  |  |     |          |          |  |  |  |      |          |          |          |  |  |     |          |          |          |          |  |      |          |          |          |          |          |      |          |          |          |          |          |       |          |          |          |          |          |  |    |    |  |  |  |      |          |  |  |  |  |       |          |          |  |  |  |
| 11 B                                                                                                                           | 0.000000                                                                                                                                                                                                                                                                                                                                                                                                                                                                                                                                                                                                                                                                                                                                                                                                                                                                                                                                                                                                                                                                                                                                                                                                                                                                                                                                                                                                                                                                                                                                                                                                                                                                                                                                                                                                                                                                                                                                                                                                                                                                                                                                                                                                                                                                                                                                                                                                                      |          |          |          |          |   |   |     |          |  |  |  |  |     |          |          |  |  |  |      |          |          |          |  |  |     |          |          |          |          |  |     |          |          |          |          |          |      |          |          |          |          |          |     |          |          |          |          |          |      |          |          |          |          |          |     |          |          |          |          |          |      |          |          |          |          |          |      |          |          |          |          |          |       |          |          |          |          |          |  |   |   |   |   |    |      |          |  |  |  |  |     |          |          |  |  |  |      |          |          |          |  |  |     |          |          |          |          |  |      |          |          |          |          |          |      |          |          |          |          |          |       |          |          |          |          |          |  |    |    |  |  |  |      |          |  |  |  |  |       |          |          |  |  |  |
| 12 Ru                                                                                                                          | 2.347849                                                                                                                                                                                                                                                                                                                                                                                                                                                                                                                                                                                                                                                                                                                                                                                                                                                                                                                                                                                                                                                                                                                                                                                                                                                                                                                                                                                                                                                                                                                                                                                                                                                                                                                                                                                                                                                                                                                                                                                                                                                                                                                                                                                                                                                                                                                                                                                                                      | 0.000000 |          |          |          |   |   |     |          |  |  |  |  |     |          |          |  |  |  |      |          |          |          |  |  |     |          |          |          |          |  |     |          |          |          |          |          |      |          |          |          |          |          |     |          |          |          |          |          |      |          |          |          |          |          |     |          |          |          |          |          |      |          |          |          |          |          |      |          |          |          |          |          |       |          |          |          |          |          |  |   |   |   |   |    |      |          |  |  |  |  |     |          |          |  |  |  |      |          |          |          |  |  |     |          |          |          |          |  |      |          |          |          |          |          |      |          |          |          |          |          |       |          |          |          |          |          |  |    |    |  |  |  |      |          |  |  |  |  |       |          |          |  |  |  |



Table S5C Energy ranking of the  $\text{Cp}_2\text{Ru}_2\text{B}_{10}\text{H}_{10}$  structures.

| No | Initial structure               | Final energy (a.u.) | $\Delta E_{\text{kcal/mole}}$ |
|----|---------------------------------|---------------------|-------------------------------|
| 1  | 12-Ru-2-Cuboctaedru-g_r-91      | -831.64407734       | 0.00                          |
| 2  | 12-Ru-2-Cuboctaedru-g_r-11-93   | -831.64403184       | 0.03                          |
| 3  | 12-Ru-2-Cuboctaedru-g_r-25      | -831.64397722       | 0.06                          |
| 4  | 12-Ru-2-Cuboctaedru-f           | -831.64397153       | 0.07                          |
| 5  | 12-Ru-2-Cuboctaedru-g_r-11 i-93 | -831.64396481       | 0.07                          |
| 6  | 12-Ru-2-Cuboctaedru-g imag      | -831.64391304       | 0.10                          |
| 7  | 12-Ru-1-Icos-b_r-97             | -831.64382989       | 0.16                          |
| 8  | 12-Ru-1-Icos-b i-97             | -831.64374350       | 0.21                          |
| 9  | 12-Ru-3-Anticuboh-j_r-21        | -831.63961592       | 2.80                          |
| 10 | 12-Ru-3-Anticuboh-j_r-1063      | -831.63950945       | 2.87                          |
| 11 | 12-Ru-3-Anticuboh-h_r-46        | -831.62282569       | 13.34                         |
| 12 | 12-Ru-3-Anticuboh-e             | -831.61923852       | 15.59                         |
| 13 | 12-Ru-2-Cuboctaedru-h           | -831.61473009       | 18.42                         |
| 14 | 12-Ru-3-Anticuboh-i_r-205       | -831.61473009       | 18.42                         |
| 15 | 12-Ru-2-Cuboctaedru-e           | -831.61266881       | 19.71                         |
| 16 | 12-Ru-3-Anticuboh-a_r-133       | -831.61266881       | 19.71                         |
| 17 | 12-Ru-3-Anticuboh-a_r-26        | -831.61266881       | 19.71                         |
| 18 | 12-Ru-1-Icos-a                  | -831.61266880       | 19.71                         |
| 19 | 12-Ru-Ig-4                      | -831.59955086       | 27.94                         |
| 20 | 12-Ru-2-Cuboctaedru-b           | -831.59725636       | 29.38                         |
| 21 | 12-Ru-3-Anticuboh-d             | -831.59410049       | 31.36                         |
| 22 | 12-Ru-3-Anticuboh-c             | -831.58802219       | 35.17                         |
| 23 | 12-Ru-2-Cuboctaedru-a           | -831.58764729       | 35.41                         |
| 24 | 12-Ru-3-Anticuboh-i_r-130       | -831.58734550       | 35.60                         |
| 25 | 12-Ru-3-Anticuboh-i_r-156-89    | -831.58217815       | 38.84                         |
| 26 | 12-Ru-3-Anticuboh-i_r-81-89     | -831.58217815       | 38.84                         |
| 27 | 12-Ru-2-Cuboctaedru-d           | -831.57537914       | 43.11                         |
| 28 | 12-Ru-2-Cuboctaedru-i_r-34      | -831.57407692       | 43.93                         |
| 29 | 12-Ru-2-Cuboctaedru-i_r-40      | -831.57393838       | 44.01                         |
| 30 | 12-Ru-1-Icos-c                  | -831.57370521       | 44.16                         |
| 31 | 12-Ru-2-Cuboctaedru-i imag      | -831.57124356       | 45.70                         |
| 32 | 12-Ru-3-Anticuboh-i_r-156 i-89  | -831.56169036       | 51.70                         |
| 33 | 12-Ru-3-Anticuboh-i_r-81 i-89   | -831.56169035       | 51.70                         |
| 34 | 12-Ru-3-Anticuboh-f             | -831.55226961       | 57.61                         |
| 35 | 12-Ru-2-Cuboctaedru-c           | -831.55212860       | 57.70                         |
| 36 | 12-Ru-3-Anticuboh-j imag        | -831.53105406       | 70.92                         |
| 37 | 12-Ru-3-Anticuboh-g             | -831.51884452       | 78.58                         |
| 38 | 12-Ru-3-Anticuboh-i_r-325       | -831.51882755       | 78.59                         |
| 39 | 12-Ru-3-Anticuboh-a imag        | -831.50834023       | 85.18                         |

|    |                          |               |        |
|----|--------------------------|---------------|--------|
| 40 | 12-Ru-3-Anticuboh-h i-46 | -831.50678548 | 86.15  |
| 41 | 12-Ru-3-Anticuboh-b      | -831.49490665 | 93.60  |
| 42 | 12-Ru-Bipypr-decag       | -831.46397792 | 113.01 |
| 43 | 12-Ru-3-Anticuboh-l imag | -831.40793232 | 148.18 |

## The 8-vertex $\text{Cp}_2\text{Os}_2\text{B}_6\text{H}_6$ Structures

Table S6A. Initial structures

Table S6B. Best structures distances

Table S6C. Global ranking of all structures

Table S6A Initial  $\text{Cp}_2\text{Os}_2\text{B}_6\text{H}_6$  structures (one example from each family); 84 structures in total

|                                                                                                                                             |                                                                                                                                                 |                                                                                                                         |
|---------------------------------------------------------------------------------------------------------------------------------------------|-------------------------------------------------------------------------------------------------------------------------------------------------|-------------------------------------------------------------------------------------------------------------------------|
| <p><b>Initial structures</b></p>                                                                                                            | 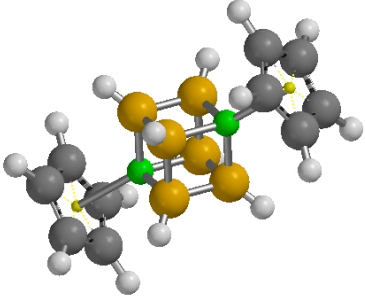 <p>1. Cube 3</p>                                              |  <p>2. Antiprism 4</p>               |
|  <p>3. Trigonal Prism 6</p>                                |  <p>4. Trigonal Antiprism 8</p>                                |  <p>5. Bisdisphenoid 6</p>           |
|  <p>6. Hexagonal bipyramid 4</p>                         |  <p>7. All-capped tetrahedron 5</p>                          |  <p>8. Nido structure 9</p>        |
|  <p>9. Dicapped trigonal prism (<math>C_3</math>) 18</p> |  <p>10. Dicapped trigonal prism (<math>C_{2v}</math>) 10</p> |  <p>11. Dicapped octahedron 11</p> |

Table S6B. Distance table for the lowest energy Cp<sub>2</sub>Os<sub>2</sub>B<sub>6</sub>H<sub>6</sub> structures

| 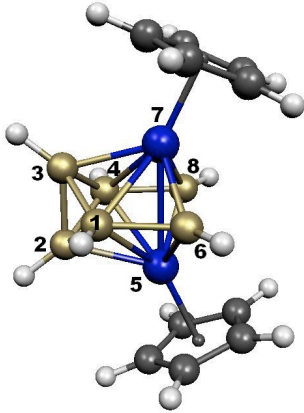 <p>1. -721.39864397 0.0 C<sub>2v</sub></p>   | <table border="1"> <thead> <tr> <th></th> <th>1</th> <th>2</th> <th>3</th> <th>4</th> <th>5</th> </tr> </thead> <tbody> <tr><td>1 B</td><td>0.000000</td><td></td><td></td><td></td><td></td></tr> <tr><td>2 B</td><td>1.744278</td><td>0.000000</td><td></td><td></td><td></td></tr> <tr><td>3 B</td><td>1.744328</td><td>1.729700</td><td>0.000000</td><td></td><td></td></tr> <tr><td>4 B</td><td>2.566400</td><td>1.744278</td><td>1.744328</td><td>0.000000</td><td></td></tr> <tr><td>5 Os</td><td>2.282213</td><td>2.154528</td><td>3.068854</td><td>2.282213</td><td>0.000000</td></tr> <tr><td>6 B</td><td>1.819109</td><td>3.120440</td><td>3.120468</td><td>3.292260</td><td>2.081176</td></tr> <tr><td>7 Os</td><td>2.282213</td><td>3.068781</td><td>2.154504</td><td>2.282213</td><td>2.761000</td></tr> <tr><td>8 B</td><td>3.292260</td><td>3.120440</td><td>3.120468</td><td>1.819109</td><td>2.081176</td></tr> <tr> <td></td> <td>6</td> <td>7</td> <td>8</td> <td></td> <td></td> </tr> <tr><td>6 B</td><td>0.000000</td><td></td><td></td><td></td><td></td></tr> <tr><td>7 Os</td><td>2.081176</td><td>0.000000</td><td></td><td></td><td></td></tr> <tr><td>8 B</td><td>2.934000</td><td>2.081176</td><td>0.000000</td><td></td><td></td></tr> </tbody> </table> |          | 1        | 2        | 3        | 4 | 5 | 1 B  | 0.000000 |  |  |  |  | 2 B  | 1.744278 | 0.000000 |  |  |  | 3 B | 1.744328 | 1.729700 | 0.000000 |  |  | 4 B | 2.566400 | 1.744278 | 1.744328 | 0.000000 |  | 5 Os | 2.282213 | 2.154528 | 3.068854 | 2.282213 | 0.000000 | 6 B  | 1.819109 | 3.120440 | 3.120468 | 3.292260 | 2.081176 | 7 Os | 2.282213 | 3.068781 | 2.154504 | 2.282213 | 2.761000 | 8 B | 3.292260 | 3.120440 | 3.120468 | 1.819109 | 2.081176 |  | 6 | 7 | 8 |  |  | 6 B  | 0.000000 |  |  |  |  | 7 Os | 2.081176 | 0.000000 |  |  |  | 8 B | 2.934000 | 2.081176 | 0.000000 |  |  |
|--------------------------------------------------------------------------------------------------------------------------------|-----------------------------------------------------------------------------------------------------------------------------------------------------------------------------------------------------------------------------------------------------------------------------------------------------------------------------------------------------------------------------------------------------------------------------------------------------------------------------------------------------------------------------------------------------------------------------------------------------------------------------------------------------------------------------------------------------------------------------------------------------------------------------------------------------------------------------------------------------------------------------------------------------------------------------------------------------------------------------------------------------------------------------------------------------------------------------------------------------------------------------------------------------------------------------------------------------------------------------------------------------------------------------------------|----------|----------|----------|----------|---|---|------|----------|--|--|--|--|------|----------|----------|--|--|--|-----|----------|----------|----------|--|--|-----|----------|----------|----------|----------|--|------|----------|----------|----------|----------|----------|------|----------|----------|----------|----------|----------|------|----------|----------|----------|----------|----------|-----|----------|----------|----------|----------|----------|--|---|---|---|--|--|------|----------|--|--|--|--|------|----------|----------|--|--|--|-----|----------|----------|----------|--|--|
|                                                                                                                                | 1                                                                                                                                                                                                                                                                                                                                                                                                                                                                                                                                                                                                                                                                                                                                                                                                                                                                                                                                                                                                                                                                                                                                                                                                                                                                                       | 2        | 3        | 4        | 5        |   |   |      |          |  |  |  |  |      |          |          |  |  |  |     |          |          |          |  |  |     |          |          |          |          |  |      |          |          |          |          |          |      |          |          |          |          |          |      |          |          |          |          |          |     |          |          |          |          |          |  |   |   |   |  |  |      |          |  |  |  |  |      |          |          |  |  |  |     |          |          |          |  |  |
| 1 B                                                                                                                            | 0.000000                                                                                                                                                                                                                                                                                                                                                                                                                                                                                                                                                                                                                                                                                                                                                                                                                                                                                                                                                                                                                                                                                                                                                                                                                                                                                |          |          |          |          |   |   |      |          |  |  |  |  |      |          |          |  |  |  |     |          |          |          |  |  |     |          |          |          |          |  |      |          |          |          |          |          |      |          |          |          |          |          |      |          |          |          |          |          |     |          |          |          |          |          |  |   |   |   |  |  |      |          |  |  |  |  |      |          |          |  |  |  |     |          |          |          |  |  |
| 2 B                                                                                                                            | 1.744278                                                                                                                                                                                                                                                                                                                                                                                                                                                                                                                                                                                                                                                                                                                                                                                                                                                                                                                                                                                                                                                                                                                                                                                                                                                                                | 0.000000 |          |          |          |   |   |      |          |  |  |  |  |      |          |          |  |  |  |     |          |          |          |  |  |     |          |          |          |          |  |      |          |          |          |          |          |      |          |          |          |          |          |      |          |          |          |          |          |     |          |          |          |          |          |  |   |   |   |  |  |      |          |  |  |  |  |      |          |          |  |  |  |     |          |          |          |  |  |
| 3 B                                                                                                                            | 1.744328                                                                                                                                                                                                                                                                                                                                                                                                                                                                                                                                                                                                                                                                                                                                                                                                                                                                                                                                                                                                                                                                                                                                                                                                                                                                                | 1.729700 | 0.000000 |          |          |   |   |      |          |  |  |  |  |      |          |          |  |  |  |     |          |          |          |  |  |     |          |          |          |          |  |      |          |          |          |          |          |      |          |          |          |          |          |      |          |          |          |          |          |     |          |          |          |          |          |  |   |   |   |  |  |      |          |  |  |  |  |      |          |          |  |  |  |     |          |          |          |  |  |
| 4 B                                                                                                                            | 2.566400                                                                                                                                                                                                                                                                                                                                                                                                                                                                                                                                                                                                                                                                                                                                                                                                                                                                                                                                                                                                                                                                                                                                                                                                                                                                                | 1.744278 | 1.744328 | 0.000000 |          |   |   |      |          |  |  |  |  |      |          |          |  |  |  |     |          |          |          |  |  |     |          |          |          |          |  |      |          |          |          |          |          |      |          |          |          |          |          |      |          |          |          |          |          |     |          |          |          |          |          |  |   |   |   |  |  |      |          |  |  |  |  |      |          |          |  |  |  |     |          |          |          |  |  |
| 5 Os                                                                                                                           | 2.282213                                                                                                                                                                                                                                                                                                                                                                                                                                                                                                                                                                                                                                                                                                                                                                                                                                                                                                                                                                                                                                                                                                                                                                                                                                                                                | 2.154528 | 3.068854 | 2.282213 | 0.000000 |   |   |      |          |  |  |  |  |      |          |          |  |  |  |     |          |          |          |  |  |     |          |          |          |          |  |      |          |          |          |          |          |      |          |          |          |          |          |      |          |          |          |          |          |     |          |          |          |          |          |  |   |   |   |  |  |      |          |  |  |  |  |      |          |          |  |  |  |     |          |          |          |  |  |
| 6 B                                                                                                                            | 1.819109                                                                                                                                                                                                                                                                                                                                                                                                                                                                                                                                                                                                                                                                                                                                                                                                                                                                                                                                                                                                                                                                                                                                                                                                                                                                                | 3.120440 | 3.120468 | 3.292260 | 2.081176 |   |   |      |          |  |  |  |  |      |          |          |  |  |  |     |          |          |          |  |  |     |          |          |          |          |  |      |          |          |          |          |          |      |          |          |          |          |          |      |          |          |          |          |          |     |          |          |          |          |          |  |   |   |   |  |  |      |          |  |  |  |  |      |          |          |  |  |  |     |          |          |          |  |  |
| 7 Os                                                                                                                           | 2.282213                                                                                                                                                                                                                                                                                                                                                                                                                                                                                                                                                                                                                                                                                                                                                                                                                                                                                                                                                                                                                                                                                                                                                                                                                                                                                | 3.068781 | 2.154504 | 2.282213 | 2.761000 |   |   |      |          |  |  |  |  |      |          |          |  |  |  |     |          |          |          |  |  |     |          |          |          |          |  |      |          |          |          |          |          |      |          |          |          |          |          |      |          |          |          |          |          |     |          |          |          |          |          |  |   |   |   |  |  |      |          |  |  |  |  |      |          |          |  |  |  |     |          |          |          |  |  |
| 8 B                                                                                                                            | 3.292260                                                                                                                                                                                                                                                                                                                                                                                                                                                                                                                                                                                                                                                                                                                                                                                                                                                                                                                                                                                                                                                                                                                                                                                                                                                                                | 3.120440 | 3.120468 | 1.819109 | 2.081176 |   |   |      |          |  |  |  |  |      |          |          |  |  |  |     |          |          |          |  |  |     |          |          |          |          |  |      |          |          |          |          |          |      |          |          |          |          |          |      |          |          |          |          |          |     |          |          |          |          |          |  |   |   |   |  |  |      |          |  |  |  |  |      |          |          |  |  |  |     |          |          |          |  |  |
|                                                                                                                                | 6                                                                                                                                                                                                                                                                                                                                                                                                                                                                                                                                                                                                                                                                                                                                                                                                                                                                                                                                                                                                                                                                                                                                                                                                                                                                                       | 7        | 8        |          |          |   |   |      |          |  |  |  |  |      |          |          |  |  |  |     |          |          |          |  |  |     |          |          |          |          |  |      |          |          |          |          |          |      |          |          |          |          |          |      |          |          |          |          |          |     |          |          |          |          |          |  |   |   |   |  |  |      |          |  |  |  |  |      |          |          |  |  |  |     |          |          |          |  |  |
| 6 B                                                                                                                            | 0.000000                                                                                                                                                                                                                                                                                                                                                                                                                                                                                                                                                                                                                                                                                                                                                                                                                                                                                                                                                                                                                                                                                                                                                                                                                                                                                |          |          |          |          |   |   |      |          |  |  |  |  |      |          |          |  |  |  |     |          |          |          |  |  |     |          |          |          |          |  |      |          |          |          |          |          |      |          |          |          |          |          |      |          |          |          |          |          |     |          |          |          |          |          |  |   |   |   |  |  |      |          |  |  |  |  |      |          |          |  |  |  |     |          |          |          |  |  |
| 7 Os                                                                                                                           | 2.081176                                                                                                                                                                                                                                                                                                                                                                                                                                                                                                                                                                                                                                                                                                                                                                                                                                                                                                                                                                                                                                                                                                                                                                                                                                                                                | 0.000000 |          |          |          |   |   |      |          |  |  |  |  |      |          |          |  |  |  |     |          |          |          |  |  |     |          |          |          |          |  |      |          |          |          |          |          |      |          |          |          |          |          |      |          |          |          |          |          |     |          |          |          |          |          |  |   |   |   |  |  |      |          |  |  |  |  |      |          |          |  |  |  |     |          |          |          |  |  |
| 8 B                                                                                                                            | 2.934000                                                                                                                                                                                                                                                                                                                                                                                                                                                                                                                                                                                                                                                                                                                                                                                                                                                                                                                                                                                                                                                                                                                                                                                                                                                                                | 2.081176 | 0.000000 |          |          |   |   |      |          |  |  |  |  |      |          |          |  |  |  |     |          |          |          |  |  |     |          |          |          |          |  |      |          |          |          |          |          |      |          |          |          |          |          |      |          |          |          |          |          |     |          |          |          |          |          |  |   |   |   |  |  |      |          |  |  |  |  |      |          |          |  |  |  |     |          |          |          |  |  |
|  <p>2. -721.36451489 +21.4 C<sub>s</sub></p> | <table border="1"> <thead> <tr> <th></th> <th>1</th> <th>2</th> <th>3</th> <th>4</th> <th>5</th> </tr> </thead> <tbody> <tr><td>1 Os</td><td>0.000000</td><td></td><td></td><td></td><td></td></tr> <tr><td>2 Os</td><td>2.780800</td><td>0.000000</td><td></td><td></td><td></td></tr> <tr><td>3 B</td><td>2.178377</td><td>3.061375</td><td>0.000000</td><td></td><td></td></tr> <tr><td>4 B</td><td>3.061375</td><td>2.178377</td><td>1.663800</td><td>0.000000</td><td></td></tr> <tr><td>5 B</td><td>2.130116</td><td>2.130116</td><td>3.132565</td><td>3.132565</td><td>0.000000</td></tr> <tr><td>6 B</td><td>2.292604</td><td>2.292604</td><td>1.767820</td><td>1.767820</td><td>1.772809</td></tr> <tr><td>7 B</td><td>2.047052</td><td>2.047052</td><td>3.698277</td><td>3.698277</td><td>1.961541</td></tr> <tr><td>8 B</td><td>2.233130</td><td>2.233130</td><td>1.755706</td><td>1.755706</td><td>3.275324</td></tr> <tr> <td></td> <td>6</td> <td>7</td> <td>8</td> <td></td> <td></td> </tr> <tr><td>6 B</td><td>0.000000</td><td></td><td></td><td></td><td></td></tr> <tr><td>7 B</td><td>3.123571</td><td>0.000000</td><td></td><td></td><td></td></tr> <tr><td>8 B</td><td>2.574465</td><td>2.923562</td><td>0.000000</td><td></td><td></td></tr> </tbody> </table>  |          | 1        | 2        | 3        | 4 | 5 | 1 Os | 0.000000 |  |  |  |  | 2 Os | 2.780800 | 0.000000 |  |  |  | 3 B | 2.178377 | 3.061375 | 0.000000 |  |  | 4 B | 3.061375 | 2.178377 | 1.663800 | 0.000000 |  | 5 B  | 2.130116 | 2.130116 | 3.132565 | 3.132565 | 0.000000 | 6 B  | 2.292604 | 2.292604 | 1.767820 | 1.767820 | 1.772809 | 7 B  | 2.047052 | 2.047052 | 3.698277 | 3.698277 | 1.961541 | 8 B | 2.233130 | 2.233130 | 1.755706 | 1.755706 | 3.275324 |  | 6 | 7 | 8 |  |  | 6 B  | 0.000000 |  |  |  |  | 7 B  | 3.123571 | 0.000000 |  |  |  | 8 B | 2.574465 | 2.923562 | 0.000000 |  |  |
|                                                                                                                                | 1                                                                                                                                                                                                                                                                                                                                                                                                                                                                                                                                                                                                                                                                                                                                                                                                                                                                                                                                                                                                                                                                                                                                                                                                                                                                                       | 2        | 3        | 4        | 5        |   |   |      |          |  |  |  |  |      |          |          |  |  |  |     |          |          |          |  |  |     |          |          |          |          |  |      |          |          |          |          |          |      |          |          |          |          |          |      |          |          |          |          |          |     |          |          |          |          |          |  |   |   |   |  |  |      |          |  |  |  |  |      |          |          |  |  |  |     |          |          |          |  |  |
| 1 Os                                                                                                                           | 0.000000                                                                                                                                                                                                                                                                                                                                                                                                                                                                                                                                                                                                                                                                                                                                                                                                                                                                                                                                                                                                                                                                                                                                                                                                                                                                                |          |          |          |          |   |   |      |          |  |  |  |  |      |          |          |  |  |  |     |          |          |          |  |  |     |          |          |          |          |  |      |          |          |          |          |          |      |          |          |          |          |          |      |          |          |          |          |          |     |          |          |          |          |          |  |   |   |   |  |  |      |          |  |  |  |  |      |          |          |  |  |  |     |          |          |          |  |  |
| 2 Os                                                                                                                           | 2.780800                                                                                                                                                                                                                                                                                                                                                                                                                                                                                                                                                                                                                                                                                                                                                                                                                                                                                                                                                                                                                                                                                                                                                                                                                                                                                | 0.000000 |          |          |          |   |   |      |          |  |  |  |  |      |          |          |  |  |  |     |          |          |          |  |  |     |          |          |          |          |  |      |          |          |          |          |          |      |          |          |          |          |          |      |          |          |          |          |          |     |          |          |          |          |          |  |   |   |   |  |  |      |          |  |  |  |  |      |          |          |  |  |  |     |          |          |          |  |  |
| 3 B                                                                                                                            | 2.178377                                                                                                                                                                                                                                                                                                                                                                                                                                                                                                                                                                                                                                                                                                                                                                                                                                                                                                                                                                                                                                                                                                                                                                                                                                                                                | 3.061375 | 0.000000 |          |          |   |   |      |          |  |  |  |  |      |          |          |  |  |  |     |          |          |          |  |  |     |          |          |          |          |  |      |          |          |          |          |          |      |          |          |          |          |          |      |          |          |          |          |          |     |          |          |          |          |          |  |   |   |   |  |  |      |          |  |  |  |  |      |          |          |  |  |  |     |          |          |          |  |  |
| 4 B                                                                                                                            | 3.061375                                                                                                                                                                                                                                                                                                                                                                                                                                                                                                                                                                                                                                                                                                                                                                                                                                                                                                                                                                                                                                                                                                                                                                                                                                                                                | 2.178377 | 1.663800 | 0.000000 |          |   |   |      |          |  |  |  |  |      |          |          |  |  |  |     |          |          |          |  |  |     |          |          |          |          |  |      |          |          |          |          |          |      |          |          |          |          |          |      |          |          |          |          |          |     |          |          |          |          |          |  |   |   |   |  |  |      |          |  |  |  |  |      |          |          |  |  |  |     |          |          |          |  |  |
| 5 B                                                                                                                            | 2.130116                                                                                                                                                                                                                                                                                                                                                                                                                                                                                                                                                                                                                                                                                                                                                                                                                                                                                                                                                                                                                                                                                                                                                                                                                                                                                | 2.130116 | 3.132565 | 3.132565 | 0.000000 |   |   |      |          |  |  |  |  |      |          |          |  |  |  |     |          |          |          |  |  |     |          |          |          |          |  |      |          |          |          |          |          |      |          |          |          |          |          |      |          |          |          |          |          |     |          |          |          |          |          |  |   |   |   |  |  |      |          |  |  |  |  |      |          |          |  |  |  |     |          |          |          |  |  |
| 6 B                                                                                                                            | 2.292604                                                                                                                                                                                                                                                                                                                                                                                                                                                                                                                                                                                                                                                                                                                                                                                                                                                                                                                                                                                                                                                                                                                                                                                                                                                                                | 2.292604 | 1.767820 | 1.767820 | 1.772809 |   |   |      |          |  |  |  |  |      |          |          |  |  |  |     |          |          |          |  |  |     |          |          |          |          |  |      |          |          |          |          |          |      |          |          |          |          |          |      |          |          |          |          |          |     |          |          |          |          |          |  |   |   |   |  |  |      |          |  |  |  |  |      |          |          |  |  |  |     |          |          |          |  |  |
| 7 B                                                                                                                            | 2.047052                                                                                                                                                                                                                                                                                                                                                                                                                                                                                                                                                                                                                                                                                                                                                                                                                                                                                                                                                                                                                                                                                                                                                                                                                                                                                | 2.047052 | 3.698277 | 3.698277 | 1.961541 |   |   |      |          |  |  |  |  |      |          |          |  |  |  |     |          |          |          |  |  |     |          |          |          |          |  |      |          |          |          |          |          |      |          |          |          |          |          |      |          |          |          |          |          |     |          |          |          |          |          |  |   |   |   |  |  |      |          |  |  |  |  |      |          |          |  |  |  |     |          |          |          |  |  |
| 8 B                                                                                                                            | 2.233130                                                                                                                                                                                                                                                                                                                                                                                                                                                                                                                                                                                                                                                                                                                                                                                                                                                                                                                                                                                                                                                                                                                                                                                                                                                                                | 2.233130 | 1.755706 | 1.755706 | 3.275324 |   |   |      |          |  |  |  |  |      |          |          |  |  |  |     |          |          |          |  |  |     |          |          |          |          |  |      |          |          |          |          |          |      |          |          |          |          |          |      |          |          |          |          |          |     |          |          |          |          |          |  |   |   |   |  |  |      |          |  |  |  |  |      |          |          |  |  |  |     |          |          |          |  |  |
|                                                                                                                                | 6                                                                                                                                                                                                                                                                                                                                                                                                                                                                                                                                                                                                                                                                                                                                                                                                                                                                                                                                                                                                                                                                                                                                                                                                                                                                                       | 7        | 8        |          |          |   |   |      |          |  |  |  |  |      |          |          |  |  |  |     |          |          |          |  |  |     |          |          |          |          |  |      |          |          |          |          |          |      |          |          |          |          |          |      |          |          |          |          |          |     |          |          |          |          |          |  |   |   |   |  |  |      |          |  |  |  |  |      |          |          |  |  |  |     |          |          |          |  |  |
| 6 B                                                                                                                            | 0.000000                                                                                                                                                                                                                                                                                                                                                                                                                                                                                                                                                                                                                                                                                                                                                                                                                                                                                                                                                                                                                                                                                                                                                                                                                                                                                |          |          |          |          |   |   |      |          |  |  |  |  |      |          |          |  |  |  |     |          |          |          |  |  |     |          |          |          |          |  |      |          |          |          |          |          |      |          |          |          |          |          |      |          |          |          |          |          |     |          |          |          |          |          |  |   |   |   |  |  |      |          |  |  |  |  |      |          |          |  |  |  |     |          |          |          |  |  |
| 7 B                                                                                                                            | 3.123571                                                                                                                                                                                                                                                                                                                                                                                                                                                                                                                                                                                                                                                                                                                                                                                                                                                                                                                                                                                                                                                                                                                                                                                                                                                                                | 0.000000 |          |          |          |   |   |      |          |  |  |  |  |      |          |          |  |  |  |     |          |          |          |  |  |     |          |          |          |          |  |      |          |          |          |          |          |      |          |          |          |          |          |      |          |          |          |          |          |     |          |          |          |          |          |  |   |   |   |  |  |      |          |  |  |  |  |      |          |          |  |  |  |     |          |          |          |  |  |
| 8 B                                                                                                                            | 2.574465                                                                                                                                                                                                                                                                                                                                                                                                                                                                                                                                                                                                                                                                                                                                                                                                                                                                                                                                                                                                                                                                                                                                                                                                                                                                                | 2.923562 | 0.000000 |          |          |   |   |      |          |  |  |  |  |      |          |          |  |  |  |     |          |          |          |  |  |     |          |          |          |          |  |      |          |          |          |          |          |      |          |          |          |          |          |      |          |          |          |          |          |     |          |          |          |          |          |  |   |   |   |  |  |      |          |  |  |  |  |      |          |          |  |  |  |     |          |          |          |  |  |
|  <p>3. -721.34916678 +31.1</p>              | <table border="1"> <thead> <tr> <th></th> <th>1</th> <th>2</th> <th>3</th> <th>4</th> <th>5</th> </tr> </thead> <tbody> <tr><td>1 B</td><td>0.000000</td><td></td><td></td><td></td><td></td></tr> <tr><td>2 Os</td><td>2.340578</td><td>0.000000</td><td></td><td></td><td></td></tr> <tr><td>3 B</td><td>1.803407</td><td>3.122767</td><td>0.000000</td><td></td><td></td></tr> <tr><td>4 B</td><td>2.578962</td><td>2.173444</td><td>1.817437</td><td>0.000000</td><td></td></tr> <tr><td>5 B</td><td>2.035718</td><td>2.112065</td><td>3.226468</td><td>3.169046</td><td>0.000000</td></tr> <tr><td>6 Os</td><td>2.279618</td><td>2.802609</td><td>2.089405</td><td>2.197278</td><td>2.004246</td></tr> <tr><td>7 B</td><td>1.849699</td><td>1.980976</td><td>3.061344</td><td>3.062515</td><td>2.938845</td></tr> <tr><td>8 B</td><td>1.806552</td><td>2.286864</td><td>1.692064</td><td>1.767977</td><td>3.331332</td></tr> <tr> <td></td> <td>6</td> <td>7</td> <td>8</td> <td></td> <td></td> </tr> <tr><td>6 Os</td><td>0.000000</td><td></td><td></td><td></td><td></td></tr> <tr><td>7 B</td><td>3.729456</td><td>0.000000</td><td></td><td></td><td></td></tr> <tr><td>8 B</td><td>3.048694</td><td>1.771753</td><td>0.000000</td><td></td><td></td></tr> </tbody> </table> |          | 1        | 2        | 3        | 4 | 5 | 1 B  | 0.000000 |  |  |  |  | 2 Os | 2.340578 | 0.000000 |  |  |  | 3 B | 1.803407 | 3.122767 | 0.000000 |  |  | 4 B | 2.578962 | 2.173444 | 1.817437 | 0.000000 |  | 5 B  | 2.035718 | 2.112065 | 3.226468 | 3.169046 | 0.000000 | 6 Os | 2.279618 | 2.802609 | 2.089405 | 2.197278 | 2.004246 | 7 B  | 1.849699 | 1.980976 | 3.061344 | 3.062515 | 2.938845 | 8 B | 1.806552 | 2.286864 | 1.692064 | 1.767977 | 3.331332 |  | 6 | 7 | 8 |  |  | 6 Os | 0.000000 |  |  |  |  | 7 B  | 3.729456 | 0.000000 |  |  |  | 8 B | 3.048694 | 1.771753 | 0.000000 |  |  |
|                                                                                                                                | 1                                                                                                                                                                                                                                                                                                                                                                                                                                                                                                                                                                                                                                                                                                                                                                                                                                                                                                                                                                                                                                                                                                                                                                                                                                                                                       | 2        | 3        | 4        | 5        |   |   |      |          |  |  |  |  |      |          |          |  |  |  |     |          |          |          |  |  |     |          |          |          |          |  |      |          |          |          |          |          |      |          |          |          |          |          |      |          |          |          |          |          |     |          |          |          |          |          |  |   |   |   |  |  |      |          |  |  |  |  |      |          |          |  |  |  |     |          |          |          |  |  |
| 1 B                                                                                                                            | 0.000000                                                                                                                                                                                                                                                                                                                                                                                                                                                                                                                                                                                                                                                                                                                                                                                                                                                                                                                                                                                                                                                                                                                                                                                                                                                                                |          |          |          |          |   |   |      |          |  |  |  |  |      |          |          |  |  |  |     |          |          |          |  |  |     |          |          |          |          |  |      |          |          |          |          |          |      |          |          |          |          |          |      |          |          |          |          |          |     |          |          |          |          |          |  |   |   |   |  |  |      |          |  |  |  |  |      |          |          |  |  |  |     |          |          |          |  |  |
| 2 Os                                                                                                                           | 2.340578                                                                                                                                                                                                                                                                                                                                                                                                                                                                                                                                                                                                                                                                                                                                                                                                                                                                                                                                                                                                                                                                                                                                                                                                                                                                                | 0.000000 |          |          |          |   |   |      |          |  |  |  |  |      |          |          |  |  |  |     |          |          |          |  |  |     |          |          |          |          |  |      |          |          |          |          |          |      |          |          |          |          |          |      |          |          |          |          |          |     |          |          |          |          |          |  |   |   |   |  |  |      |          |  |  |  |  |      |          |          |  |  |  |     |          |          |          |  |  |
| 3 B                                                                                                                            | 1.803407                                                                                                                                                                                                                                                                                                                                                                                                                                                                                                                                                                                                                                                                                                                                                                                                                                                                                                                                                                                                                                                                                                                                                                                                                                                                                | 3.122767 | 0.000000 |          |          |   |   |      |          |  |  |  |  |      |          |          |  |  |  |     |          |          |          |  |  |     |          |          |          |          |  |      |          |          |          |          |          |      |          |          |          |          |          |      |          |          |          |          |          |     |          |          |          |          |          |  |   |   |   |  |  |      |          |  |  |  |  |      |          |          |  |  |  |     |          |          |          |  |  |
| 4 B                                                                                                                            | 2.578962                                                                                                                                                                                                                                                                                                                                                                                                                                                                                                                                                                                                                                                                                                                                                                                                                                                                                                                                                                                                                                                                                                                                                                                                                                                                                | 2.173444 | 1.817437 | 0.000000 |          |   |   |      |          |  |  |  |  |      |          |          |  |  |  |     |          |          |          |  |  |     |          |          |          |          |  |      |          |          |          |          |          |      |          |          |          |          |          |      |          |          |          |          |          |     |          |          |          |          |          |  |   |   |   |  |  |      |          |  |  |  |  |      |          |          |  |  |  |     |          |          |          |  |  |
| 5 B                                                                                                                            | 2.035718                                                                                                                                                                                                                                                                                                                                                                                                                                                                                                                                                                                                                                                                                                                                                                                                                                                                                                                                                                                                                                                                                                                                                                                                                                                                                | 2.112065 | 3.226468 | 3.169046 | 0.000000 |   |   |      |          |  |  |  |  |      |          |          |  |  |  |     |          |          |          |  |  |     |          |          |          |          |  |      |          |          |          |          |          |      |          |          |          |          |          |      |          |          |          |          |          |     |          |          |          |          |          |  |   |   |   |  |  |      |          |  |  |  |  |      |          |          |  |  |  |     |          |          |          |  |  |
| 6 Os                                                                                                                           | 2.279618                                                                                                                                                                                                                                                                                                                                                                                                                                                                                                                                                                                                                                                                                                                                                                                                                                                                                                                                                                                                                                                                                                                                                                                                                                                                                | 2.802609 | 2.089405 | 2.197278 | 2.004246 |   |   |      |          |  |  |  |  |      |          |          |  |  |  |     |          |          |          |  |  |     |          |          |          |          |  |      |          |          |          |          |          |      |          |          |          |          |          |      |          |          |          |          |          |     |          |          |          |          |          |  |   |   |   |  |  |      |          |  |  |  |  |      |          |          |  |  |  |     |          |          |          |  |  |
| 7 B                                                                                                                            | 1.849699                                                                                                                                                                                                                                                                                                                                                                                                                                                                                                                                                                                                                                                                                                                                                                                                                                                                                                                                                                                                                                                                                                                                                                                                                                                                                | 1.980976 | 3.061344 | 3.062515 | 2.938845 |   |   |      |          |  |  |  |  |      |          |          |  |  |  |     |          |          |          |  |  |     |          |          |          |          |  |      |          |          |          |          |          |      |          |          |          |          |          |      |          |          |          |          |          |     |          |          |          |          |          |  |   |   |   |  |  |      |          |  |  |  |  |      |          |          |  |  |  |     |          |          |          |  |  |
| 8 B                                                                                                                            | 1.806552                                                                                                                                                                                                                                                                                                                                                                                                                                                                                                                                                                                                                                                                                                                                                                                                                                                                                                                                                                                                                                                                                                                                                                                                                                                                                | 2.286864 | 1.692064 | 1.767977 | 3.331332 |   |   |      |          |  |  |  |  |      |          |          |  |  |  |     |          |          |          |  |  |     |          |          |          |          |  |      |          |          |          |          |          |      |          |          |          |          |          |      |          |          |          |          |          |     |          |          |          |          |          |  |   |   |   |  |  |      |          |  |  |  |  |      |          |          |  |  |  |     |          |          |          |  |  |
|                                                                                                                                | 6                                                                                                                                                                                                                                                                                                                                                                                                                                                                                                                                                                                                                                                                                                                                                                                                                                                                                                                                                                                                                                                                                                                                                                                                                                                                                       | 7        | 8        |          |          |   |   |      |          |  |  |  |  |      |          |          |  |  |  |     |          |          |          |  |  |     |          |          |          |          |  |      |          |          |          |          |          |      |          |          |          |          |          |      |          |          |          |          |          |     |          |          |          |          |          |  |   |   |   |  |  |      |          |  |  |  |  |      |          |          |  |  |  |     |          |          |          |  |  |
| 6 Os                                                                                                                           | 0.000000                                                                                                                                                                                                                                                                                                                                                                                                                                                                                                                                                                                                                                                                                                                                                                                                                                                                                                                                                                                                                                                                                                                                                                                                                                                                                |          |          |          |          |   |   |      |          |  |  |  |  |      |          |          |  |  |  |     |          |          |          |  |  |     |          |          |          |          |  |      |          |          |          |          |          |      |          |          |          |          |          |      |          |          |          |          |          |     |          |          |          |          |          |  |   |   |   |  |  |      |          |  |  |  |  |      |          |          |  |  |  |     |          |          |          |  |  |
| 7 B                                                                                                                            | 3.729456                                                                                                                                                                                                                                                                                                                                                                                                                                                                                                                                                                                                                                                                                                                                                                                                                                                                                                                                                                                                                                                                                                                                                                                                                                                                                | 0.000000 |          |          |          |   |   |      |          |  |  |  |  |      |          |          |  |  |  |     |          |          |          |  |  |     |          |          |          |          |  |      |          |          |          |          |          |      |          |          |          |          |          |      |          |          |          |          |          |     |          |          |          |          |          |  |   |   |   |  |  |      |          |  |  |  |  |      |          |          |  |  |  |     |          |          |          |  |  |
| 8 B                                                                                                                            | 3.048694                                                                                                                                                                                                                                                                                                                                                                                                                                                                                                                                                                                                                                                                                                                                                                                                                                                                                                                                                                                                                                                                                                                                                                                                                                                                                | 1.771753 | 0.000000 |          |          |   |   |      |          |  |  |  |  |      |          |          |  |  |  |     |          |          |          |  |  |     |          |          |          |          |  |      |          |          |          |          |          |      |          |          |          |          |          |      |          |          |          |          |          |     |          |          |          |          |          |  |   |   |   |  |  |      |          |  |  |  |  |      |          |          |  |  |  |     |          |          |          |  |  |

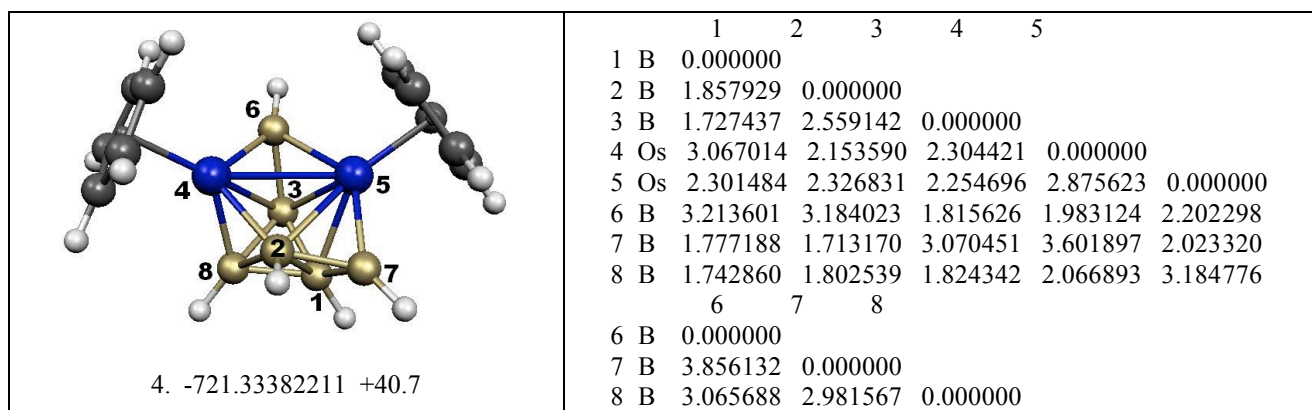

Table S6C. Energy ranking of the  $\text{Cp}_2\text{Os}_2\text{B}_6\text{H}_6$  structures.

| No | Initial structure           | Final energy (a.u.) | D<br>kcal/mole |
|----|-----------------------------|---------------------|----------------|
| 1  | 01-Os-Cub-b                 | -721.39864397       | 0.00           |
| 2  | 03-Os-PrTrig-f              | -721.39864397       | 0.00           |
| 3  | 05-Os-Bisdisph-d            | -721.39864397       | 0.00           |
| 4  | 09-Os-DicapTrPr-Cs-e        | -721.39864397       | 0.00           |
| 5  | 09-Os-DicapTrPr-Cs-i        | -721.39864397       | 0.00           |
| 6  | 07-Os-Tdallcap-d            | -721.39864396       | 0.00           |
| 7  | 08-Os-Nido-c                | -721.39864396       | 0.00           |
| 8  | 08-Os-Nido-f                | -721.39864396       | 0.00           |
| 9  | 09-Os-DicapTrPr-Cs-r        | -721.36451489       | 21.42          |
| 10 | 09-Os-DicapTrPr-Cs-k        | -721.34916678       | 31.05          |
| 11 | 09-Os-DicapTrPr-Cs-a        | -721.34916677       | 31.05          |
| 12 | 11-Os-DicapOh-c             | -721.34916676       | 31.05          |
| 13 | 04-Os-AntiprTrig-d          | -721.34916675       | 31.05          |
| 14 | 08-Os-Nido-i                | -721.34916675       | 31.05          |
| 15 | 04-Os-AntiprTrig-c          | -721.34903970       | 31.13          |
| 16 | 09-Os-DicapTrPr-Cs-n        | -721.33382211       | 40.68          |
| 17 | 08-Os-Nido-b                | -721.33382210       | 40.68          |
| 18 | 09-Os-DicapTrPr-Cs-m        | -721.33376081       | 40.71          |
| 19 | 11-Os-DicapOh-b             | -721.33376079       | 40.71          |
| 20 | 04-Os-AntiprTrig-g          | -721.32691398       | 45.01          |
| 21 | 03-Os-PrTrig-d              | -721.32691172       | 45.01          |
| 22 | 01-Os-Cub-a                 | -721.32691171       | 45.01          |
| 23 | 08-Os-Nido-e                | -721.32691171       | 45.01          |
| 24 | 02-Os-Antipr-d              | -721.32414669       | 46.75          |
| 25 | 10-Os-DicapTrPr-C2v-g       | -721.32414669       | 46.75          |
| 26 | 05-Os-Bisdisph-f_r-180      | -721.31974759       | 49.51          |
| 27 | 10-Os-DicapTrPr-C2v-c_r-353 | -721.31974759       | 49.51          |
| 28 | 10-Os-DicapTrPr-C2v-i       | -721.31974759       | 49.51          |
| 29 | 02-Os-Antipr-b              | -721.31974260       | 49.51          |
| 30 | 02-Os-Antipr-c              | -721.31974260       | 49.51          |
| 31 | 10-Os-DicapTrPr-C2v-b       | -721.31974260       | 49.51          |
| 32 | 05-Os-Bisdisph-b            | -721.31973567       | 49.51          |
| 33 | 06-Os-Bipirhex-d            | -721.31948224       | 49.67          |
| 34 | 08-Os-Nido-h                | -721.31921756       | 49.84          |
| 35 | 09-Os-DicapTrPr-Cs-p        | -721.31516753       | 52.38          |
| 36 | 09-Os-DicapTrPr-Cs-h        | -721.31516752       | 52.38          |
| 37 | 07-Os-Tdallcap-e            | -721.31464226       | 52.71          |
| 38 | 09-Os-DicapTrPr-Cs-q        | -721.31403204       | 53.09          |
| 39 | 11-Os-DicapOh-i             | -721.31384762       | 53.21          |
| 40 | 07-Os-Tdallcap-c            | -721.31307904       | 53.69          |
| 41 | 06-Os-Bipirhex-b            | -721.31296355       | 53.76          |

|    |                                  |               |       |
|----|----------------------------------|---------------|-------|
| 42 | 10-Os-DicapTrPr-C2v-f_r-165      | -721.31262646 | 53.98 |
| 43 | 04-Os-AntiprTrig-h               | -721.31116813 | 54.89 |
| 44 | 08-Os-Nido-g                     | -721.31084123 | 55.10 |
| 45 | 06-Os-Bipirhex-a                 | -721.30996870 | 55.64 |
| 46 | 05-Os-Bisdisph-c                 | -721.30865138 | 56.47 |
| 47 | 08-Os-Nido-d                     | -721.30865138 | 56.47 |
| 48 | 10-Os-DicapTrPr-C2v-e            | -721.30865137 | 56.47 |
| 49 | 10-Os-DicapTrPr-C2v-j_r-45       | -721.30865137 | 56.47 |
| 50 | 11-Os-DicapOh-d                  | -721.30865137 | 56.47 |
| 51 | 09-Os-DicapTrPr-Cs-j             | -721.30865136 | 56.47 |
| 52 | 10-Os-DicapTrPr-C2v-f_r-262-32   | -721.30860593 | 56.50 |
| 53 | 11-Os-DicapOh-g                  | -721.30860593 | 56.50 |
| 54 | 11-Os-DicapOh-j                  | -721.30860593 | 56.50 |
| 55 | 02-Os-Antipr-a                   | -721.30773380 | 57.05 |
| 56 | 05-Os-Bisdisph-a                 | -721.30773380 | 57.05 |
| 57 | 09-Os-DicapTrPr-Cs-g             | -721.30773380 | 57.05 |
| 58 | 09-Os-DicapTrPr-Cs-l             | -721.30773380 | 57.05 |
| 59 | 10-Os-DicapTrPr-C2v-a            | -721.30773380 | 57.05 |
| 60 | 10-Os-DicapTrPr-C2v-h_r-272      | -721.30773380 | 57.05 |
| 61 | 03-Os-PrTrig-b                   | -721.30760342 | 57.13 |
| 62 | 11-Os-DicapOh-k                  | -721.30732384 | 57.30 |
| 63 | 11-Os-DicapOh-e                  | -721.30732382 | 57.30 |
| 64 | 04-Os-AntiprTrig-f               | -721.30715898 | 57.41 |
| 65 | 10-Os-DicapTrPr-C2v-j i-45       | -721.30320680 | 59.89 |
| 66 | 07-Os-Tdallcap-b                 | -721.30285638 | 60.11 |
| 67 | 09-Os-DicapTrPr-Cs-o             | -721.30280622 | 60.14 |
| 68 | 10-Os-DicapTrPr-C2v-d            | -721.30199494 | 60.65 |
| 69 | 11-Os-DicapOh-a                  | -721.30060936 | 61.52 |
| 70 | 09-Os-DicapTrPr-Cs-d             | -721.30056827 | 61.54 |
| 71 | 03-Os-PrTrig-e                   | -721.29840227 | 62.90 |
| 72 | 04-Os-AntiprTrig-e               | -721.29281405 | 66.41 |
| 73 | 05-Os-Bisdisph-e                 | -721.29281404 | 66.41 |
| 74 | 03-Os-PrTrig-a                   | -721.29188025 | 66.99 |
| 75 | 09-Os-DicapTrPr-Cs-f             | -721.29039114 | 67.93 |
| 76 | 10-Os-DicapTrPr-C2v-c i-353      | -721.29031563 | 67.98 |
| 77 | 07-Os-Tdallcap-a                 | -721.29017227 | 68.07 |
| 78 | 11-Os-DicapOh-h                  | -721.28200085 | 73.19 |
| 79 | 08-Os-Nido-a                     | -721.28019230 | 74.33 |
| 80 | 09-Os-DicapTrPr-Cs-c             | -721.27323602 | 78.69 |
| 81 | 10-Os-DicapTrPr-C2v-h i-272      | -721.27036285 | 80.50 |
| 82 | 01-Os-Cub-c                      | -721.26569335 | 83.43 |
| 83 | 10-Os-DicapTrPr-C2v-f_r-262 i-32 | -721.26555245 | 83.51 |
| 84 | 05-Os-Bisdisph-f i-180           | -721.26460859 | 84.11 |
| 85 | 11-Os-DicapOh-f                  | -721.25801630 | 88.24 |
| 86 | 06-Os-Bipirhex-c                 | -721.25398606 | 90.77 |



|    |                            |               |        |
|----|----------------------------|---------------|--------|
| 87 | 09-Os-DicapTrPr-Cs-b_r-19  | -721.25068712 | 92.84  |
| 88 | 09-Os-DicapTrPr-Cs-b i-19  | -721.25063749 | 92.87  |
| 89 | 04-Os-AntiprTrig-a         | -721.24099369 | 98.93  |
| 90 | 04-Os-AntiprTrig-b         | -721.24092061 | 98.97  |
| 91 | 10-Os-DicapTrPr-C2v-f imag | -721.22634461 | 108.12 |
| 92 | 03-Os-PrTrig-c             | -721.20472312 | 121.69 |

## The 9-vertex $\text{Cp}_2\text{Os}_2\text{B}_7\text{H}_7$ System

Table S7A. Initial structures

Table S7B. Best structures distances

Table S7C. Global ranking of all structures

Table S7A. Initial  $\text{Cp}_2\text{Os}_2\text{B}_7\text{H}_7$  structures (one example from each family); 43 structures in total

| <b>Initial structures</b>                                                           |                                                     |
|-------------------------------------------------------------------------------------|-----------------------------------------------------|
| 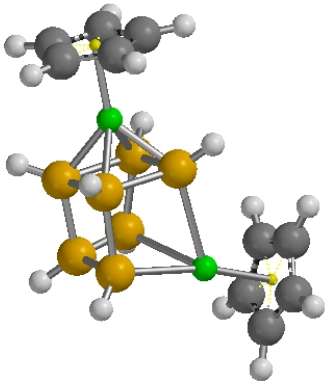   | 1. Capped cube 9 structures                         |
|   | 2. Pressed capped cube 15 structures                |
|  | 3. $\text{Tl}_9^{9-}$ -like structure 13 structures |
|  | 4. Tricapped trigonal prism 6 structures            |

Table S7B. Distance table for the lowest energy Cp<sub>2</sub>Os<sub>2</sub>B<sub>7</sub>H<sub>7</sub> structures

| 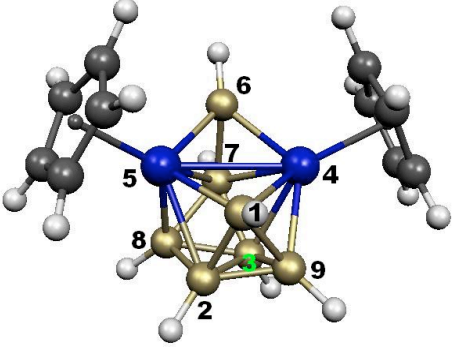 <p>1. -746.84793009 0.0</p>                   | <table border="1"> <thead> <tr> <th></th> <th>1</th> <th>2</th> <th>3</th> <th>4</th> <th>5</th> </tr> </thead> <tbody> <tr><td>1 B</td><td>0.000000</td><td></td><td></td><td></td><td></td></tr> <tr><td>2 B</td><td>1.807580</td><td>0.000000</td><td></td><td></td><td></td></tr> <tr><td>3 B</td><td>2.827795</td><td>1.940284</td><td>0.000000</td><td></td><td></td></tr> <tr><td>4 Os</td><td>2.246889</td><td>3.017026</td><td>2.317620</td><td>0.000000</td><td></td></tr> <tr><td>5 Os</td><td>2.106133</td><td>2.348629</td><td>3.008113</td><td>2.851078</td><td>0.000000</td></tr> <tr><td>6 B</td><td>3.072646</td><td>3.672873</td><td>3.202932</td><td>2.084896</td><td>2.058310</td></tr> <tr><td>7 B</td><td>3.163290</td><td>2.822998</td><td>1.738874</td><td>2.212012</td><td>2.296519</td></tr> <tr><td>8 B</td><td>2.986675</td><td>1.783179</td><td>1.777405</td><td>3.265609</td><td>2.093255</td></tr> <tr><td>9 B</td><td>1.772212</td><td>1.692800</td><td>1.799697</td><td>2.119956</td><td>3.209958</td></tr> <tr><td></td><td>6</td><td>7</td><td>8</td><td>9</td><td></td></tr> <tr><td>6 B</td><td>0.000000</td><td></td><td></td><td></td><td></td></tr> <tr><td>7 B</td><td>1.816996</td><td>0.000000</td><td></td><td></td><td></td></tr> <tr><td>8 B</td><td>3.084669</td><td>1.764738</td><td>0.000000</td><td></td><td></td></tr> <tr><td>9 B</td><td>3.698144</td><td>3.017139</td><td>2.901926</td><td>0.000000</td><td></td></tr> </tbody> </table>   |          | 1        | 2        | 3        | 4 | 5 | 1 B | 0.000000 |  |  |  |  | 2 B | 1.807580 | 0.000000 |  |  |  | 3 B | 2.827795 | 1.940284 | 0.000000 |  |  | 4 Os | 2.246889 | 3.017026 | 2.317620 | 0.000000 |  | 5 Os | 2.106133 | 2.348629 | 3.008113 | 2.851078 | 0.000000 | 6 B  | 3.072646 | 3.672873 | 3.202932 | 2.084896 | 2.058310 | 7 B  | 3.163290 | 2.822998 | 1.738874 | 2.212012 | 2.296519 | 8 B  | 2.986675 | 1.783179 | 1.777405 | 3.265609 | 2.093255 | 9 B | 1.772212 | 1.692800 | 1.799697 | 2.119956 | 3.209958 |  | 6 | 7 | 8 | 9 |  | 6 B  | 0.000000 |  |  |  |  | 7 B  | 1.816996 | 0.000000 |  |  |  | 8 B  | 3.084669 | 1.764738 | 0.000000 |  |  | 9 B | 3.698144 | 3.017139 | 2.901926 | 0.000000 |  |
|---------------------------------------------------------------------------------------------------------------------------------|--------------------------------------------------------------------------------------------------------------------------------------------------------------------------------------------------------------------------------------------------------------------------------------------------------------------------------------------------------------------------------------------------------------------------------------------------------------------------------------------------------------------------------------------------------------------------------------------------------------------------------------------------------------------------------------------------------------------------------------------------------------------------------------------------------------------------------------------------------------------------------------------------------------------------------------------------------------------------------------------------------------------------------------------------------------------------------------------------------------------------------------------------------------------------------------------------------------------------------------------------------------------------------------------------------------------------------------------------------------------------------------------------------------------------------------------------------------------------------------------------|----------|----------|----------|----------|---|---|-----|----------|--|--|--|--|-----|----------|----------|--|--|--|-----|----------|----------|----------|--|--|------|----------|----------|----------|----------|--|------|----------|----------|----------|----------|----------|------|----------|----------|----------|----------|----------|------|----------|----------|----------|----------|----------|------|----------|----------|----------|----------|----------|-----|----------|----------|----------|----------|----------|--|---|---|---|---|--|------|----------|--|--|--|--|------|----------|----------|--|--|--|------|----------|----------|----------|--|--|-----|----------|----------|----------|----------|--|
|                                                                                                                                 | 1                                                                                                                                                                                                                                                                                                                                                                                                                                                                                                                                                                                                                                                                                                                                                                                                                                                                                                                                                                                                                                                                                                                                                                                                                                                                                                                                                                                                                                                                                                | 2        | 3        | 4        | 5        |   |   |     |          |  |  |  |  |     |          |          |  |  |  |     |          |          |          |  |  |      |          |          |          |          |  |      |          |          |          |          |          |      |          |          |          |          |          |      |          |          |          |          |          |      |          |          |          |          |          |     |          |          |          |          |          |  |   |   |   |   |  |      |          |  |  |  |  |      |          |          |  |  |  |      |          |          |          |  |  |     |          |          |          |          |  |
| 1 B                                                                                                                             | 0.000000                                                                                                                                                                                                                                                                                                                                                                                                                                                                                                                                                                                                                                                                                                                                                                                                                                                                                                                                                                                                                                                                                                                                                                                                                                                                                                                                                                                                                                                                                         |          |          |          |          |   |   |     |          |  |  |  |  |     |          |          |  |  |  |     |          |          |          |  |  |      |          |          |          |          |  |      |          |          |          |          |          |      |          |          |          |          |          |      |          |          |          |          |          |      |          |          |          |          |          |     |          |          |          |          |          |  |   |   |   |   |  |      |          |  |  |  |  |      |          |          |  |  |  |      |          |          |          |  |  |     |          |          |          |          |  |
| 2 B                                                                                                                             | 1.807580                                                                                                                                                                                                                                                                                                                                                                                                                                                                                                                                                                                                                                                                                                                                                                                                                                                                                                                                                                                                                                                                                                                                                                                                                                                                                                                                                                                                                                                                                         | 0.000000 |          |          |          |   |   |     |          |  |  |  |  |     |          |          |  |  |  |     |          |          |          |  |  |      |          |          |          |          |  |      |          |          |          |          |          |      |          |          |          |          |          |      |          |          |          |          |          |      |          |          |          |          |          |     |          |          |          |          |          |  |   |   |   |   |  |      |          |  |  |  |  |      |          |          |  |  |  |      |          |          |          |  |  |     |          |          |          |          |  |
| 3 B                                                                                                                             | 2.827795                                                                                                                                                                                                                                                                                                                                                                                                                                                                                                                                                                                                                                                                                                                                                                                                                                                                                                                                                                                                                                                                                                                                                                                                                                                                                                                                                                                                                                                                                         | 1.940284 | 0.000000 |          |          |   |   |     |          |  |  |  |  |     |          |          |  |  |  |     |          |          |          |  |  |      |          |          |          |          |  |      |          |          |          |          |          |      |          |          |          |          |          |      |          |          |          |          |          |      |          |          |          |          |          |     |          |          |          |          |          |  |   |   |   |   |  |      |          |  |  |  |  |      |          |          |  |  |  |      |          |          |          |  |  |     |          |          |          |          |  |
| 4 Os                                                                                                                            | 2.246889                                                                                                                                                                                                                                                                                                                                                                                                                                                                                                                                                                                                                                                                                                                                                                                                                                                                                                                                                                                                                                                                                                                                                                                                                                                                                                                                                                                                                                                                                         | 3.017026 | 2.317620 | 0.000000 |          |   |   |     |          |  |  |  |  |     |          |          |  |  |  |     |          |          |          |  |  |      |          |          |          |          |  |      |          |          |          |          |          |      |          |          |          |          |          |      |          |          |          |          |          |      |          |          |          |          |          |     |          |          |          |          |          |  |   |   |   |   |  |      |          |  |  |  |  |      |          |          |  |  |  |      |          |          |          |  |  |     |          |          |          |          |  |
| 5 Os                                                                                                                            | 2.106133                                                                                                                                                                                                                                                                                                                                                                                                                                                                                                                                                                                                                                                                                                                                                                                                                                                                                                                                                                                                                                                                                                                                                                                                                                                                                                                                                                                                                                                                                         | 2.348629 | 3.008113 | 2.851078 | 0.000000 |   |   |     |          |  |  |  |  |     |          |          |  |  |  |     |          |          |          |  |  |      |          |          |          |          |  |      |          |          |          |          |          |      |          |          |          |          |          |      |          |          |          |          |          |      |          |          |          |          |          |     |          |          |          |          |          |  |   |   |   |   |  |      |          |  |  |  |  |      |          |          |  |  |  |      |          |          |          |  |  |     |          |          |          |          |  |
| 6 B                                                                                                                             | 3.072646                                                                                                                                                                                                                                                                                                                                                                                                                                                                                                                                                                                                                                                                                                                                                                                                                                                                                                                                                                                                                                                                                                                                                                                                                                                                                                                                                                                                                                                                                         | 3.672873 | 3.202932 | 2.084896 | 2.058310 |   |   |     |          |  |  |  |  |     |          |          |  |  |  |     |          |          |          |  |  |      |          |          |          |          |  |      |          |          |          |          |          |      |          |          |          |          |          |      |          |          |          |          |          |      |          |          |          |          |          |     |          |          |          |          |          |  |   |   |   |   |  |      |          |  |  |  |  |      |          |          |  |  |  |      |          |          |          |  |  |     |          |          |          |          |  |
| 7 B                                                                                                                             | 3.163290                                                                                                                                                                                                                                                                                                                                                                                                                                                                                                                                                                                                                                                                                                                                                                                                                                                                                                                                                                                                                                                                                                                                                                                                                                                                                                                                                                                                                                                                                         | 2.822998 | 1.738874 | 2.212012 | 2.296519 |   |   |     |          |  |  |  |  |     |          |          |  |  |  |     |          |          |          |  |  |      |          |          |          |          |  |      |          |          |          |          |          |      |          |          |          |          |          |      |          |          |          |          |          |      |          |          |          |          |          |     |          |          |          |          |          |  |   |   |   |   |  |      |          |  |  |  |  |      |          |          |  |  |  |      |          |          |          |  |  |     |          |          |          |          |  |
| 8 B                                                                                                                             | 2.986675                                                                                                                                                                                                                                                                                                                                                                                                                                                                                                                                                                                                                                                                                                                                                                                                                                                                                                                                                                                                                                                                                                                                                                                                                                                                                                                                                                                                                                                                                         | 1.783179 | 1.777405 | 3.265609 | 2.093255 |   |   |     |          |  |  |  |  |     |          |          |  |  |  |     |          |          |          |  |  |      |          |          |          |          |  |      |          |          |          |          |          |      |          |          |          |          |          |      |          |          |          |          |          |      |          |          |          |          |          |     |          |          |          |          |          |  |   |   |   |   |  |      |          |  |  |  |  |      |          |          |  |  |  |      |          |          |          |  |  |     |          |          |          |          |  |
| 9 B                                                                                                                             | 1.772212                                                                                                                                                                                                                                                                                                                                                                                                                                                                                                                                                                                                                                                                                                                                                                                                                                                                                                                                                                                                                                                                                                                                                                                                                                                                                                                                                                                                                                                                                         | 1.692800 | 1.799697 | 2.119956 | 3.209958 |   |   |     |          |  |  |  |  |     |          |          |  |  |  |     |          |          |          |  |  |      |          |          |          |          |  |      |          |          |          |          |          |      |          |          |          |          |          |      |          |          |          |          |          |      |          |          |          |          |          |     |          |          |          |          |          |  |   |   |   |   |  |      |          |  |  |  |  |      |          |          |  |  |  |      |          |          |          |  |  |     |          |          |          |          |  |
|                                                                                                                                 | 6                                                                                                                                                                                                                                                                                                                                                                                                                                                                                                                                                                                                                                                                                                                                                                                                                                                                                                                                                                                                                                                                                                                                                                                                                                                                                                                                                                                                                                                                                                | 7        | 8        | 9        |          |   |   |     |          |  |  |  |  |     |          |          |  |  |  |     |          |          |          |  |  |      |          |          |          |          |  |      |          |          |          |          |          |      |          |          |          |          |          |      |          |          |          |          |          |      |          |          |          |          |          |     |          |          |          |          |          |  |   |   |   |   |  |      |          |  |  |  |  |      |          |          |  |  |  |      |          |          |          |  |  |     |          |          |          |          |  |
| 6 B                                                                                                                             | 0.000000                                                                                                                                                                                                                                                                                                                                                                                                                                                                                                                                                                                                                                                                                                                                                                                                                                                                                                                                                                                                                                                                                                                                                                                                                                                                                                                                                                                                                                                                                         |          |          |          |          |   |   |     |          |  |  |  |  |     |          |          |  |  |  |     |          |          |          |  |  |      |          |          |          |          |  |      |          |          |          |          |          |      |          |          |          |          |          |      |          |          |          |          |          |      |          |          |          |          |          |     |          |          |          |          |          |  |   |   |   |   |  |      |          |  |  |  |  |      |          |          |  |  |  |      |          |          |          |  |  |     |          |          |          |          |  |
| 7 B                                                                                                                             | 1.816996                                                                                                                                                                                                                                                                                                                                                                                                                                                                                                                                                                                                                                                                                                                                                                                                                                                                                                                                                                                                                                                                                                                                                                                                                                                                                                                                                                                                                                                                                         | 0.000000 |          |          |          |   |   |     |          |  |  |  |  |     |          |          |  |  |  |     |          |          |          |  |  |      |          |          |          |          |  |      |          |          |          |          |          |      |          |          |          |          |          |      |          |          |          |          |          |      |          |          |          |          |          |     |          |          |          |          |          |  |   |   |   |   |  |      |          |  |  |  |  |      |          |          |  |  |  |      |          |          |          |  |  |     |          |          |          |          |  |
| 8 B                                                                                                                             | 3.084669                                                                                                                                                                                                                                                                                                                                                                                                                                                                                                                                                                                                                                                                                                                                                                                                                                                                                                                                                                                                                                                                                                                                                                                                                                                                                                                                                                                                                                                                                         | 1.764738 | 0.000000 |          |          |   |   |     |          |  |  |  |  |     |          |          |  |  |  |     |          |          |          |  |  |      |          |          |          |          |  |      |          |          |          |          |          |      |          |          |          |          |          |      |          |          |          |          |          |      |          |          |          |          |          |     |          |          |          |          |          |  |   |   |   |   |  |      |          |  |  |  |  |      |          |          |  |  |  |      |          |          |          |  |  |     |          |          |          |          |  |
| 9 B                                                                                                                             | 3.698144                                                                                                                                                                                                                                                                                                                                                                                                                                                                                                                                                                                                                                                                                                                                                                                                                                                                                                                                                                                                                                                                                                                                                                                                                                                                                                                                                                                                                                                                                         | 3.017139 | 2.901926 | 0.000000 |          |   |   |     |          |  |  |  |  |     |          |          |  |  |  |     |          |          |          |  |  |      |          |          |          |          |  |      |          |          |          |          |          |      |          |          |          |          |          |      |          |          |          |          |          |      |          |          |          |          |          |     |          |          |          |          |          |  |   |   |   |   |  |      |          |  |  |  |  |      |          |          |  |  |  |      |          |          |          |  |  |     |          |          |          |          |  |
|  <p>2. -746.82879378 +12.0 C<sub>s</sub></p>  | <table border="1"> <thead> <tr> <th></th> <th>1</th> <th>2</th> <th>3</th> <th>4</th> <th>5</th> </tr> </thead> <tbody> <tr><td>1 B</td><td>0.000000</td><td></td><td></td><td></td><td></td></tr> <tr><td>2 B</td><td>2.831200</td><td>0.000000</td><td></td><td></td><td></td></tr> <tr><td>3 B</td><td>1.823954</td><td>1.823954</td><td>0.000000</td><td></td><td></td></tr> <tr><td>4 Os</td><td>2.225887</td><td>2.225887</td><td>2.289639</td><td>0.000000</td><td></td></tr> <tr><td>5 B</td><td>3.360031</td><td>1.775652</td><td>3.199056</td><td>2.071606</td><td>0.000000</td></tr> <tr><td>6 B</td><td>1.775752</td><td>3.360084</td><td>3.199144</td><td>2.071638</td><td>2.874000</td></tr> <tr><td>7 Os</td><td>2.322753</td><td>2.322753</td><td>2.915412</td><td>2.776422</td><td>2.139320</td></tr> <tr><td>8 B</td><td>1.667316</td><td>2.716525</td><td>1.814668</td><td>3.369645</td><td>3.796265</td></tr> <tr><td>9 B</td><td>2.716525</td><td>1.667316</td><td>1.814668</td><td>3.369645</td><td>3.121303</td></tr> <tr><td></td><td>6</td><td>7</td><td>8</td><td>9</td><td></td></tr> <tr><td>6 B</td><td>0.000000</td><td></td><td></td><td></td><td></td></tr> <tr><td>7 Os</td><td>2.139351</td><td>0.000000</td><td></td><td></td><td></td></tr> <tr><td>8 B</td><td>3.121394</td><td>2.367590</td><td>0.000000</td><td></td><td></td></tr> <tr><td>9 B</td><td>3.796341</td><td>2.367590</td><td>1.624600</td><td>0.000000</td><td></td></tr> </tbody> </table>  |          | 1        | 2        | 3        | 4 | 5 | 1 B | 0.000000 |  |  |  |  | 2 B | 2.831200 | 0.000000 |  |  |  | 3 B | 1.823954 | 1.823954 | 0.000000 |  |  | 4 Os | 2.225887 | 2.225887 | 2.289639 | 0.000000 |  | 5 B  | 3.360031 | 1.775652 | 3.199056 | 2.071606 | 0.000000 | 6 B  | 1.775752 | 3.360084 | 3.199144 | 2.071638 | 2.874000 | 7 Os | 2.322753 | 2.322753 | 2.915412 | 2.776422 | 2.139320 | 8 B  | 1.667316 | 2.716525 | 1.814668 | 3.369645 | 3.796265 | 9 B | 2.716525 | 1.667316 | 1.814668 | 3.369645 | 3.121303 |  | 6 | 7 | 8 | 9 |  | 6 B  | 0.000000 |  |  |  |  | 7 Os | 2.139351 | 0.000000 |  |  |  | 8 B  | 3.121394 | 2.367590 | 0.000000 |  |  | 9 B | 3.796341 | 2.367590 | 1.624600 | 0.000000 |  |
|                                                                                                                                 | 1                                                                                                                                                                                                                                                                                                                                                                                                                                                                                                                                                                                                                                                                                                                                                                                                                                                                                                                                                                                                                                                                                                                                                                                                                                                                                                                                                                                                                                                                                                | 2        | 3        | 4        | 5        |   |   |     |          |  |  |  |  |     |          |          |  |  |  |     |          |          |          |  |  |      |          |          |          |          |  |      |          |          |          |          |          |      |          |          |          |          |          |      |          |          |          |          |          |      |          |          |          |          |          |     |          |          |          |          |          |  |   |   |   |   |  |      |          |  |  |  |  |      |          |          |  |  |  |      |          |          |          |  |  |     |          |          |          |          |  |
| 1 B                                                                                                                             | 0.000000                                                                                                                                                                                                                                                                                                                                                                                                                                                                                                                                                                                                                                                                                                                                                                                                                                                                                                                                                                                                                                                                                                                                                                                                                                                                                                                                                                                                                                                                                         |          |          |          |          |   |   |     |          |  |  |  |  |     |          |          |  |  |  |     |          |          |          |  |  |      |          |          |          |          |  |      |          |          |          |          |          |      |          |          |          |          |          |      |          |          |          |          |          |      |          |          |          |          |          |     |          |          |          |          |          |  |   |   |   |   |  |      |          |  |  |  |  |      |          |          |  |  |  |      |          |          |          |  |  |     |          |          |          |          |  |
| 2 B                                                                                                                             | 2.831200                                                                                                                                                                                                                                                                                                                                                                                                                                                                                                                                                                                                                                                                                                                                                                                                                                                                                                                                                                                                                                                                                                                                                                                                                                                                                                                                                                                                                                                                                         | 0.000000 |          |          |          |   |   |     |          |  |  |  |  |     |          |          |  |  |  |     |          |          |          |  |  |      |          |          |          |          |  |      |          |          |          |          |          |      |          |          |          |          |          |      |          |          |          |          |          |      |          |          |          |          |          |     |          |          |          |          |          |  |   |   |   |   |  |      |          |  |  |  |  |      |          |          |  |  |  |      |          |          |          |  |  |     |          |          |          |          |  |
| 3 B                                                                                                                             | 1.823954                                                                                                                                                                                                                                                                                                                                                                                                                                                                                                                                                                                                                                                                                                                                                                                                                                                                                                                                                                                                                                                                                                                                                                                                                                                                                                                                                                                                                                                                                         | 1.823954 | 0.000000 |          |          |   |   |     |          |  |  |  |  |     |          |          |  |  |  |     |          |          |          |  |  |      |          |          |          |          |  |      |          |          |          |          |          |      |          |          |          |          |          |      |          |          |          |          |          |      |          |          |          |          |          |     |          |          |          |          |          |  |   |   |   |   |  |      |          |  |  |  |  |      |          |          |  |  |  |      |          |          |          |  |  |     |          |          |          |          |  |
| 4 Os                                                                                                                            | 2.225887                                                                                                                                                                                                                                                                                                                                                                                                                                                                                                                                                                                                                                                                                                                                                                                                                                                                                                                                                                                                                                                                                                                                                                                                                                                                                                                                                                                                                                                                                         | 2.225887 | 2.289639 | 0.000000 |          |   |   |     |          |  |  |  |  |     |          |          |  |  |  |     |          |          |          |  |  |      |          |          |          |          |  |      |          |          |          |          |          |      |          |          |          |          |          |      |          |          |          |          |          |      |          |          |          |          |          |     |          |          |          |          |          |  |   |   |   |   |  |      |          |  |  |  |  |      |          |          |  |  |  |      |          |          |          |  |  |     |          |          |          |          |  |
| 5 B                                                                                                                             | 3.360031                                                                                                                                                                                                                                                                                                                                                                                                                                                                                                                                                                                                                                                                                                                                                                                                                                                                                                                                                                                                                                                                                                                                                                                                                                                                                                                                                                                                                                                                                         | 1.775652 | 3.199056 | 2.071606 | 0.000000 |   |   |     |          |  |  |  |  |     |          |          |  |  |  |     |          |          |          |  |  |      |          |          |          |          |  |      |          |          |          |          |          |      |          |          |          |          |          |      |          |          |          |          |          |      |          |          |          |          |          |     |          |          |          |          |          |  |   |   |   |   |  |      |          |  |  |  |  |      |          |          |  |  |  |      |          |          |          |  |  |     |          |          |          |          |  |
| 6 B                                                                                                                             | 1.775752                                                                                                                                                                                                                                                                                                                                                                                                                                                                                                                                                                                                                                                                                                                                                                                                                                                                                                                                                                                                                                                                                                                                                                                                                                                                                                                                                                                                                                                                                         | 3.360084 | 3.199144 | 2.071638 | 2.874000 |   |   |     |          |  |  |  |  |     |          |          |  |  |  |     |          |          |          |  |  |      |          |          |          |          |  |      |          |          |          |          |          |      |          |          |          |          |          |      |          |          |          |          |          |      |          |          |          |          |          |     |          |          |          |          |          |  |   |   |   |   |  |      |          |  |  |  |  |      |          |          |  |  |  |      |          |          |          |  |  |     |          |          |          |          |  |
| 7 Os                                                                                                                            | 2.322753                                                                                                                                                                                                                                                                                                                                                                                                                                                                                                                                                                                                                                                                                                                                                                                                                                                                                                                                                                                                                                                                                                                                                                                                                                                                                                                                                                                                                                                                                         | 2.322753 | 2.915412 | 2.776422 | 2.139320 |   |   |     |          |  |  |  |  |     |          |          |  |  |  |     |          |          |          |  |  |      |          |          |          |          |  |      |          |          |          |          |          |      |          |          |          |          |          |      |          |          |          |          |          |      |          |          |          |          |          |     |          |          |          |          |          |  |   |   |   |   |  |      |          |  |  |  |  |      |          |          |  |  |  |      |          |          |          |  |  |     |          |          |          |          |  |
| 8 B                                                                                                                             | 1.667316                                                                                                                                                                                                                                                                                                                                                                                                                                                                                                                                                                                                                                                                                                                                                                                                                                                                                                                                                                                                                                                                                                                                                                                                                                                                                                                                                                                                                                                                                         | 2.716525 | 1.814668 | 3.369645 | 3.796265 |   |   |     |          |  |  |  |  |     |          |          |  |  |  |     |          |          |          |  |  |      |          |          |          |          |  |      |          |          |          |          |          |      |          |          |          |          |          |      |          |          |          |          |          |      |          |          |          |          |          |     |          |          |          |          |          |  |   |   |   |   |  |      |          |  |  |  |  |      |          |          |  |  |  |      |          |          |          |  |  |     |          |          |          |          |  |
| 9 B                                                                                                                             | 2.716525                                                                                                                                                                                                                                                                                                                                                                                                                                                                                                                                                                                                                                                                                                                                                                                                                                                                                                                                                                                                                                                                                                                                                                                                                                                                                                                                                                                                                                                                                         | 1.667316 | 1.814668 | 3.369645 | 3.121303 |   |   |     |          |  |  |  |  |     |          |          |  |  |  |     |          |          |          |  |  |      |          |          |          |          |  |      |          |          |          |          |          |      |          |          |          |          |          |      |          |          |          |          |          |      |          |          |          |          |          |     |          |          |          |          |          |  |   |   |   |   |  |      |          |  |  |  |  |      |          |          |  |  |  |      |          |          |          |  |  |     |          |          |          |          |  |
|                                                                                                                                 | 6                                                                                                                                                                                                                                                                                                                                                                                                                                                                                                                                                                                                                                                                                                                                                                                                                                                                                                                                                                                                                                                                                                                                                                                                                                                                                                                                                                                                                                                                                                | 7        | 8        | 9        |          |   |   |     |          |  |  |  |  |     |          |          |  |  |  |     |          |          |          |  |  |      |          |          |          |          |  |      |          |          |          |          |          |      |          |          |          |          |          |      |          |          |          |          |          |      |          |          |          |          |          |     |          |          |          |          |          |  |   |   |   |   |  |      |          |  |  |  |  |      |          |          |  |  |  |      |          |          |          |  |  |     |          |          |          |          |  |
| 6 B                                                                                                                             | 0.000000                                                                                                                                                                                                                                                                                                                                                                                                                                                                                                                                                                                                                                                                                                                                                                                                                                                                                                                                                                                                                                                                                                                                                                                                                                                                                                                                                                                                                                                                                         |          |          |          |          |   |   |     |          |  |  |  |  |     |          |          |  |  |  |     |          |          |          |  |  |      |          |          |          |          |  |      |          |          |          |          |          |      |          |          |          |          |          |      |          |          |          |          |          |      |          |          |          |          |          |     |          |          |          |          |          |  |   |   |   |   |  |      |          |  |  |  |  |      |          |          |  |  |  |      |          |          |          |  |  |     |          |          |          |          |  |
| 7 Os                                                                                                                            | 2.139351                                                                                                                                                                                                                                                                                                                                                                                                                                                                                                                                                                                                                                                                                                                                                                                                                                                                                                                                                                                                                                                                                                                                                                                                                                                                                                                                                                                                                                                                                         | 0.000000 |          |          |          |   |   |     |          |  |  |  |  |     |          |          |  |  |  |     |          |          |          |  |  |      |          |          |          |          |  |      |          |          |          |          |          |      |          |          |          |          |          |      |          |          |          |          |          |      |          |          |          |          |          |     |          |          |          |          |          |  |   |   |   |   |  |      |          |  |  |  |  |      |          |          |  |  |  |      |          |          |          |  |  |     |          |          |          |          |  |
| 8 B                                                                                                                             | 3.121394                                                                                                                                                                                                                                                                                                                                                                                                                                                                                                                                                                                                                                                                                                                                                                                                                                                                                                                                                                                                                                                                                                                                                                                                                                                                                                                                                                                                                                                                                         | 2.367590 | 0.000000 |          |          |   |   |     |          |  |  |  |  |     |          |          |  |  |  |     |          |          |          |  |  |      |          |          |          |          |  |      |          |          |          |          |          |      |          |          |          |          |          |      |          |          |          |          |          |      |          |          |          |          |          |     |          |          |          |          |          |  |   |   |   |   |  |      |          |  |  |  |  |      |          |          |  |  |  |      |          |          |          |  |  |     |          |          |          |          |  |
| 9 B                                                                                                                             | 3.796341                                                                                                                                                                                                                                                                                                                                                                                                                                                                                                                                                                                                                                                                                                                                                                                                                                                                                                                                                                                                                                                                                                                                                                                                                                                                                                                                                                                                                                                                                         | 2.367590 | 1.624600 | 0.000000 |          |   |   |     |          |  |  |  |  |     |          |          |  |  |  |     |          |          |          |  |  |      |          |          |          |          |  |      |          |          |          |          |          |      |          |          |          |          |          |      |          |          |          |          |          |      |          |          |          |          |          |     |          |          |          |          |          |  |   |   |   |   |  |      |          |  |  |  |  |      |          |          |  |  |  |      |          |          |          |  |  |     |          |          |          |          |  |
|  <p>3. -746.81376772 +21.4 C<sub>2</sub></p> | <table border="1"> <thead> <tr> <th></th> <th>1</th> <th>2</th> <th>3</th> <th>4</th> <th>5</th> </tr> </thead> <tbody> <tr><td>1 B</td><td>0.000000</td><td></td><td></td><td></td><td></td></tr> <tr><td>2 B</td><td>1.821100</td><td>0.000000</td><td></td><td></td><td></td></tr> <tr><td>3 B</td><td>2.764231</td><td>2.786819</td><td>0.000000</td><td></td><td></td></tr> <tr><td>4 B</td><td>2.787291</td><td>1.775187</td><td>2.037268</td><td>0.000000</td><td></td></tr> <tr><td>5 B</td><td>2.786460</td><td>1.749839</td><td>1.839283</td><td>1.712016</td><td>0.000000</td></tr> <tr><td>6 Os</td><td>1.931653</td><td>2.242594</td><td>3.154504</td><td>2.264629</td><td>3.373803</td></tr> <tr><td>7 B</td><td>2.790226</td><td>2.964386</td><td>1.755958</td><td>1.829717</td><td>2.903286</td></tr> <tr><td>8 Os</td><td>2.016512</td><td>2.495870</td><td>2.306990</td><td>3.258588</td><td>2.157432</td></tr> <tr><td>9 B</td><td>1.803746</td><td>2.920208</td><td>1.765614</td><td>2.783234</td><td>2.972094</td></tr> <tr><td></td><td>6</td><td>7</td><td>8</td><td>9</td><td></td></tr> <tr><td>6 Os</td><td>0.000000</td><td></td><td></td><td></td><td></td></tr> <tr><td>7 B</td><td>2.064948</td><td>0.000000</td><td></td><td></td><td></td></tr> <tr><td>8 Os</td><td>3.655627</td><td>3.494412</td><td>0.000000</td><td></td><td></td></tr> <tr><td>9 B</td><td>2.375575</td><td>1.762309</td><td>2.332085</td><td>0.000000</td><td></td></tr> </tbody> </table> |          | 1        | 2        | 3        | 4 | 5 | 1 B | 0.000000 |  |  |  |  | 2 B | 1.821100 | 0.000000 |  |  |  | 3 B | 2.764231 | 2.786819 | 0.000000 |  |  | 4 B  | 2.787291 | 1.775187 | 2.037268 | 0.000000 |  | 5 B  | 2.786460 | 1.749839 | 1.839283 | 1.712016 | 0.000000 | 6 Os | 1.931653 | 2.242594 | 3.154504 | 2.264629 | 3.373803 | 7 B  | 2.790226 | 2.964386 | 1.755958 | 1.829717 | 2.903286 | 8 Os | 2.016512 | 2.495870 | 2.306990 | 3.258588 | 2.157432 | 9 B | 1.803746 | 2.920208 | 1.765614 | 2.783234 | 2.972094 |  | 6 | 7 | 8 | 9 |  | 6 Os | 0.000000 |  |  |  |  | 7 B  | 2.064948 | 0.000000 |  |  |  | 8 Os | 3.655627 | 3.494412 | 0.000000 |  |  | 9 B | 2.375575 | 1.762309 | 2.332085 | 0.000000 |  |
|                                                                                                                                 | 1                                                                                                                                                                                                                                                                                                                                                                                                                                                                                                                                                                                                                                                                                                                                                                                                                                                                                                                                                                                                                                                                                                                                                                                                                                                                                                                                                                                                                                                                                                | 2        | 3        | 4        | 5        |   |   |     |          |  |  |  |  |     |          |          |  |  |  |     |          |          |          |  |  |      |          |          |          |          |  |      |          |          |          |          |          |      |          |          |          |          |          |      |          |          |          |          |          |      |          |          |          |          |          |     |          |          |          |          |          |  |   |   |   |   |  |      |          |  |  |  |  |      |          |          |  |  |  |      |          |          |          |  |  |     |          |          |          |          |  |
| 1 B                                                                                                                             | 0.000000                                                                                                                                                                                                                                                                                                                                                                                                                                                                                                                                                                                                                                                                                                                                                                                                                                                                                                                                                                                                                                                                                                                                                                                                                                                                                                                                                                                                                                                                                         |          |          |          |          |   |   |     |          |  |  |  |  |     |          |          |  |  |  |     |          |          |          |  |  |      |          |          |          |          |  |      |          |          |          |          |          |      |          |          |          |          |          |      |          |          |          |          |          |      |          |          |          |          |          |     |          |          |          |          |          |  |   |   |   |   |  |      |          |  |  |  |  |      |          |          |  |  |  |      |          |          |          |  |  |     |          |          |          |          |  |
| 2 B                                                                                                                             | 1.821100                                                                                                                                                                                                                                                                                                                                                                                                                                                                                                                                                                                                                                                                                                                                                                                                                                                                                                                                                                                                                                                                                                                                                                                                                                                                                                                                                                                                                                                                                         | 0.000000 |          |          |          |   |   |     |          |  |  |  |  |     |          |          |  |  |  |     |          |          |          |  |  |      |          |          |          |          |  |      |          |          |          |          |          |      |          |          |          |          |          |      |          |          |          |          |          |      |          |          |          |          |          |     |          |          |          |          |          |  |   |   |   |   |  |      |          |  |  |  |  |      |          |          |  |  |  |      |          |          |          |  |  |     |          |          |          |          |  |
| 3 B                                                                                                                             | 2.764231                                                                                                                                                                                                                                                                                                                                                                                                                                                                                                                                                                                                                                                                                                                                                                                                                                                                                                                                                                                                                                                                                                                                                                                                                                                                                                                                                                                                                                                                                         | 2.786819 | 0.000000 |          |          |   |   |     |          |  |  |  |  |     |          |          |  |  |  |     |          |          |          |  |  |      |          |          |          |          |  |      |          |          |          |          |          |      |          |          |          |          |          |      |          |          |          |          |          |      |          |          |          |          |          |     |          |          |          |          |          |  |   |   |   |   |  |      |          |  |  |  |  |      |          |          |  |  |  |      |          |          |          |  |  |     |          |          |          |          |  |
| 4 B                                                                                                                             | 2.787291                                                                                                                                                                                                                                                                                                                                                                                                                                                                                                                                                                                                                                                                                                                                                                                                                                                                                                                                                                                                                                                                                                                                                                                                                                                                                                                                                                                                                                                                                         | 1.775187 | 2.037268 | 0.000000 |          |   |   |     |          |  |  |  |  |     |          |          |  |  |  |     |          |          |          |  |  |      |          |          |          |          |  |      |          |          |          |          |          |      |          |          |          |          |          |      |          |          |          |          |          |      |          |          |          |          |          |     |          |          |          |          |          |  |   |   |   |   |  |      |          |  |  |  |  |      |          |          |  |  |  |      |          |          |          |  |  |     |          |          |          |          |  |
| 5 B                                                                                                                             | 2.786460                                                                                                                                                                                                                                                                                                                                                                                                                                                                                                                                                                                                                                                                                                                                                                                                                                                                                                                                                                                                                                                                                                                                                                                                                                                                                                                                                                                                                                                                                         | 1.749839 | 1.839283 | 1.712016 | 0.000000 |   |   |     |          |  |  |  |  |     |          |          |  |  |  |     |          |          |          |  |  |      |          |          |          |          |  |      |          |          |          |          |          |      |          |          |          |          |          |      |          |          |          |          |          |      |          |          |          |          |          |     |          |          |          |          |          |  |   |   |   |   |  |      |          |  |  |  |  |      |          |          |  |  |  |      |          |          |          |  |  |     |          |          |          |          |  |
| 6 Os                                                                                                                            | 1.931653                                                                                                                                                                                                                                                                                                                                                                                                                                                                                                                                                                                                                                                                                                                                                                                                                                                                                                                                                                                                                                                                                                                                                                                                                                                                                                                                                                                                                                                                                         | 2.242594 | 3.154504 | 2.264629 | 3.373803 |   |   |     |          |  |  |  |  |     |          |          |  |  |  |     |          |          |          |  |  |      |          |          |          |          |  |      |          |          |          |          |          |      |          |          |          |          |          |      |          |          |          |          |          |      |          |          |          |          |          |     |          |          |          |          |          |  |   |   |   |   |  |      |          |  |  |  |  |      |          |          |  |  |  |      |          |          |          |  |  |     |          |          |          |          |  |
| 7 B                                                                                                                             | 2.790226                                                                                                                                                                                                                                                                                                                                                                                                                                                                                                                                                                                                                                                                                                                                                                                                                                                                                                                                                                                                                                                                                                                                                                                                                                                                                                                                                                                                                                                                                         | 2.964386 | 1.755958 | 1.829717 | 2.903286 |   |   |     |          |  |  |  |  |     |          |          |  |  |  |     |          |          |          |  |  |      |          |          |          |          |  |      |          |          |          |          |          |      |          |          |          |          |          |      |          |          |          |          |          |      |          |          |          |          |          |     |          |          |          |          |          |  |   |   |   |   |  |      |          |  |  |  |  |      |          |          |  |  |  |      |          |          |          |  |  |     |          |          |          |          |  |
| 8 Os                                                                                                                            | 2.016512                                                                                                                                                                                                                                                                                                                                                                                                                                                                                                                                                                                                                                                                                                                                                                                                                                                                                                                                                                                                                                                                                                                                                                                                                                                                                                                                                                                                                                                                                         | 2.495870 | 2.306990 | 3.258588 | 2.157432 |   |   |     |          |  |  |  |  |     |          |          |  |  |  |     |          |          |          |  |  |      |          |          |          |          |  |      |          |          |          |          |          |      |          |          |          |          |          |      |          |          |          |          |          |      |          |          |          |          |          |     |          |          |          |          |          |  |   |   |   |   |  |      |          |  |  |  |  |      |          |          |  |  |  |      |          |          |          |  |  |     |          |          |          |          |  |
| 9 B                                                                                                                             | 1.803746                                                                                                                                                                                                                                                                                                                                                                                                                                                                                                                                                                                                                                                                                                                                                                                                                                                                                                                                                                                                                                                                                                                                                                                                                                                                                                                                                                                                                                                                                         | 2.920208 | 1.765614 | 2.783234 | 2.972094 |   |   |     |          |  |  |  |  |     |          |          |  |  |  |     |          |          |          |  |  |      |          |          |          |          |  |      |          |          |          |          |          |      |          |          |          |          |          |      |          |          |          |          |          |      |          |          |          |          |          |     |          |          |          |          |          |  |   |   |   |   |  |      |          |  |  |  |  |      |          |          |  |  |  |      |          |          |          |  |  |     |          |          |          |          |  |
|                                                                                                                                 | 6                                                                                                                                                                                                                                                                                                                                                                                                                                                                                                                                                                                                                                                                                                                                                                                                                                                                                                                                                                                                                                                                                                                                                                                                                                                                                                                                                                                                                                                                                                | 7        | 8        | 9        |          |   |   |     |          |  |  |  |  |     |          |          |  |  |  |     |          |          |          |  |  |      |          |          |          |          |  |      |          |          |          |          |          |      |          |          |          |          |          |      |          |          |          |          |          |      |          |          |          |          |          |     |          |          |          |          |          |  |   |   |   |   |  |      |          |  |  |  |  |      |          |          |  |  |  |      |          |          |          |  |  |     |          |          |          |          |  |
| 6 Os                                                                                                                            | 0.000000                                                                                                                                                                                                                                                                                                                                                                                                                                                                                                                                                                                                                                                                                                                                                                                                                                                                                                                                                                                                                                                                                                                                                                                                                                                                                                                                                                                                                                                                                         |          |          |          |          |   |   |     |          |  |  |  |  |     |          |          |  |  |  |     |          |          |          |  |  |      |          |          |          |          |  |      |          |          |          |          |          |      |          |          |          |          |          |      |          |          |          |          |          |      |          |          |          |          |          |     |          |          |          |          |          |  |   |   |   |   |  |      |          |  |  |  |  |      |          |          |  |  |  |      |          |          |          |  |  |     |          |          |          |          |  |
| 7 B                                                                                                                             | 2.064948                                                                                                                                                                                                                                                                                                                                                                                                                                                                                                                                                                                                                                                                                                                                                                                                                                                                                                                                                                                                                                                                                                                                                                                                                                                                                                                                                                                                                                                                                         | 0.000000 |          |          |          |   |   |     |          |  |  |  |  |     |          |          |  |  |  |     |          |          |          |  |  |      |          |          |          |          |  |      |          |          |          |          |          |      |          |          |          |          |          |      |          |          |          |          |          |      |          |          |          |          |          |     |          |          |          |          |          |  |   |   |   |   |  |      |          |  |  |  |  |      |          |          |  |  |  |      |          |          |          |  |  |     |          |          |          |          |  |
| 8 Os                                                                                                                            | 3.655627                                                                                                                                                                                                                                                                                                                                                                                                                                                                                                                                                                                                                                                                                                                                                                                                                                                                                                                                                                                                                                                                                                                                                                                                                                                                                                                                                                                                                                                                                         | 3.494412 | 0.000000 |          |          |   |   |     |          |  |  |  |  |     |          |          |  |  |  |     |          |          |          |  |  |      |          |          |          |          |  |      |          |          |          |          |          |      |          |          |          |          |          |      |          |          |          |          |          |      |          |          |          |          |          |     |          |          |          |          |          |  |   |   |   |   |  |      |          |  |  |  |  |      |          |          |  |  |  |      |          |          |          |  |  |     |          |          |          |          |  |
| 9 B                                                                                                                             | 2.375575                                                                                                                                                                                                                                                                                                                                                                                                                                                                                                                                                                                                                                                                                                                                                                                                                                                                                                                                                                                                                                                                                                                                                                                                                                                                                                                                                                                                                                                                                         | 1.762309 | 2.332085 | 0.000000 |          |   |   |     |          |  |  |  |  |     |          |          |  |  |  |     |          |          |          |  |  |      |          |          |          |          |  |      |          |          |          |          |          |      |          |          |          |          |          |      |          |          |          |          |          |      |          |          |          |          |          |     |          |          |          |          |          |  |   |   |   |   |  |      |          |  |  |  |  |      |          |          |  |  |  |      |          |          |          |  |  |     |          |          |          |          |  |

| 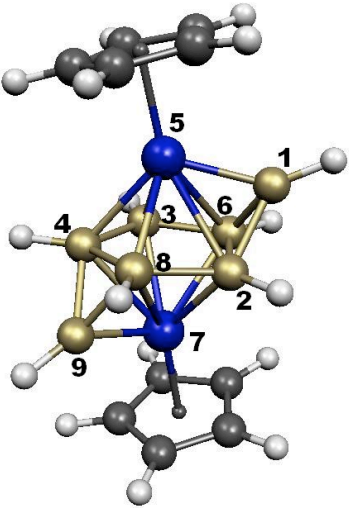 <p>4. -746.80721256 +25.6 C<sub>2</sub></p>    | <table border="1"> <thead> <tr> <th></th> <th>1</th> <th>2</th> <th>3</th> <th>4</th> <th>5</th> </tr> </thead> <tbody> <tr><td>1 B</td><td>0.000000</td><td></td><td></td><td></td><td></td></tr> <tr><td>2 B</td><td>1.759581</td><td>0.000000</td><td></td><td></td><td></td></tr> <tr><td>3 B</td><td>3.053041</td><td>2.779848</td><td>0.000000</td><td></td><td></td></tr> <tr><td>4 B</td><td>3.663787</td><td>2.846465</td><td>1.732200</td><td>0.000000</td><td></td></tr> <tr><td>5 Os</td><td>2.011987</td><td>2.378766</td><td>2.234948</td><td>2.266287</td><td>0.000000</td></tr> <tr><td>6 B</td><td>1.748380</td><td>1.745320</td><td>1.732200</td><td>2.858847</td><td>2.307436</td></tr> <tr><td>7 Os</td><td>3.576785</td><td>2.213192</td><td>2.234948</td><td>2.307436</td><td>3.462864</td></tr> <tr><td>8 B</td><td>3.004460</td><td>1.778374</td><td>2.779848</td><td>1.745320</td><td>2.213192</td></tr> <tr><td>9 B</td><td>4.458922</td><td>3.004460</td><td>3.053041</td><td>1.748380</td><td>3.576785</td></tr> <tr><td></td><td>6</td><td>7</td><td>8</td><td>9</td><td></td></tr> <tr><td>6 B</td><td>0.000000</td><td></td><td></td><td></td><td></td></tr> <tr><td>7 Os</td><td>2.266287</td><td>0.000000</td><td></td><td></td><td></td></tr> <tr><td>8 B</td><td>2.846465</td><td>2.378766</td><td>0.000000</td><td></td><td></td></tr> <tr><td>9 B</td><td>3.663787</td><td>2.011987</td><td>1.759581</td><td>0.000000</td><td></td></tr> </tbody> </table> |          | 1        | 2        | 3        | 4 | 5 | 1 B  | 0.000000 |  |  |  |  | 2 B  | 1.759581 | 0.000000 |  |  |  | 3 B | 3.053041 | 2.779848 | 0.000000 |  |  | 4 B | 3.663787 | 2.846465 | 1.732200 | 0.000000 |  | 5 Os | 2.011987 | 2.378766 | 2.234948 | 2.266287 | 0.000000 | 6 B | 1.748380 | 1.745320 | 1.732200 | 2.858847 | 2.307436 | 7 Os | 3.576785 | 2.213192 | 2.234948 | 2.307436 | 3.462864 | 8 B  | 3.004460 | 1.778374 | 2.779848 | 1.745320 | 2.213192 | 9 B | 4.458922 | 3.004460 | 3.053041 | 1.748380 | 3.576785 |  | 6 | 7 | 8 | 9 |  | 6 B | 0.000000 |  |  |  |  | 7 Os | 2.266287 | 0.000000 |  |  |  | 8 B  | 2.846465 | 2.378766 | 0.000000 |  |  | 9 B | 3.663787 | 2.011987 | 1.759581 | 0.000000 |  |
|----------------------------------------------------------------------------------------------------------------------------------|-------------------------------------------------------------------------------------------------------------------------------------------------------------------------------------------------------------------------------------------------------------------------------------------------------------------------------------------------------------------------------------------------------------------------------------------------------------------------------------------------------------------------------------------------------------------------------------------------------------------------------------------------------------------------------------------------------------------------------------------------------------------------------------------------------------------------------------------------------------------------------------------------------------------------------------------------------------------------------------------------------------------------------------------------------------------------------------------------------------------------------------------------------------------------------------------------------------------------------------------------------------------------------------------------------------------------------------------------------------------------------------------------------------------------------------------------------------------------------------------------|----------|----------|----------|----------|---|---|------|----------|--|--|--|--|------|----------|----------|--|--|--|-----|----------|----------|----------|--|--|-----|----------|----------|----------|----------|--|------|----------|----------|----------|----------|----------|-----|----------|----------|----------|----------|----------|------|----------|----------|----------|----------|----------|------|----------|----------|----------|----------|----------|-----|----------|----------|----------|----------|----------|--|---|---|---|---|--|-----|----------|--|--|--|--|------|----------|----------|--|--|--|------|----------|----------|----------|--|--|-----|----------|----------|----------|----------|--|
|                                                                                                                                  | 1                                                                                                                                                                                                                                                                                                                                                                                                                                                                                                                                                                                                                                                                                                                                                                                                                                                                                                                                                                                                                                                                                                                                                                                                                                                                                                                                                                                                                                                                                               | 2        | 3        | 4        | 5        |   |   |      |          |  |  |  |  |      |          |          |  |  |  |     |          |          |          |  |  |     |          |          |          |          |  |      |          |          |          |          |          |     |          |          |          |          |          |      |          |          |          |          |          |      |          |          |          |          |          |     |          |          |          |          |          |  |   |   |   |   |  |     |          |  |  |  |  |      |          |          |  |  |  |      |          |          |          |  |  |     |          |          |          |          |  |
| 1 B                                                                                                                              | 0.000000                                                                                                                                                                                                                                                                                                                                                                                                                                                                                                                                                                                                                                                                                                                                                                                                                                                                                                                                                                                                                                                                                                                                                                                                                                                                                                                                                                                                                                                                                        |          |          |          |          |   |   |      |          |  |  |  |  |      |          |          |  |  |  |     |          |          |          |  |  |     |          |          |          |          |  |      |          |          |          |          |          |     |          |          |          |          |          |      |          |          |          |          |          |      |          |          |          |          |          |     |          |          |          |          |          |  |   |   |   |   |  |     |          |  |  |  |  |      |          |          |  |  |  |      |          |          |          |  |  |     |          |          |          |          |  |
| 2 B                                                                                                                              | 1.759581                                                                                                                                                                                                                                                                                                                                                                                                                                                                                                                                                                                                                                                                                                                                                                                                                                                                                                                                                                                                                                                                                                                                                                                                                                                                                                                                                                                                                                                                                        | 0.000000 |          |          |          |   |   |      |          |  |  |  |  |      |          |          |  |  |  |     |          |          |          |  |  |     |          |          |          |          |  |      |          |          |          |          |          |     |          |          |          |          |          |      |          |          |          |          |          |      |          |          |          |          |          |     |          |          |          |          |          |  |   |   |   |   |  |     |          |  |  |  |  |      |          |          |  |  |  |      |          |          |          |  |  |     |          |          |          |          |  |
| 3 B                                                                                                                              | 3.053041                                                                                                                                                                                                                                                                                                                                                                                                                                                                                                                                                                                                                                                                                                                                                                                                                                                                                                                                                                                                                                                                                                                                                                                                                                                                                                                                                                                                                                                                                        | 2.779848 | 0.000000 |          |          |   |   |      |          |  |  |  |  |      |          |          |  |  |  |     |          |          |          |  |  |     |          |          |          |          |  |      |          |          |          |          |          |     |          |          |          |          |          |      |          |          |          |          |          |      |          |          |          |          |          |     |          |          |          |          |          |  |   |   |   |   |  |     |          |  |  |  |  |      |          |          |  |  |  |      |          |          |          |  |  |     |          |          |          |          |  |
| 4 B                                                                                                                              | 3.663787                                                                                                                                                                                                                                                                                                                                                                                                                                                                                                                                                                                                                                                                                                                                                                                                                                                                                                                                                                                                                                                                                                                                                                                                                                                                                                                                                                                                                                                                                        | 2.846465 | 1.732200 | 0.000000 |          |   |   |      |          |  |  |  |  |      |          |          |  |  |  |     |          |          |          |  |  |     |          |          |          |          |  |      |          |          |          |          |          |     |          |          |          |          |          |      |          |          |          |          |          |      |          |          |          |          |          |     |          |          |          |          |          |  |   |   |   |   |  |     |          |  |  |  |  |      |          |          |  |  |  |      |          |          |          |  |  |     |          |          |          |          |  |
| 5 Os                                                                                                                             | 2.011987                                                                                                                                                                                                                                                                                                                                                                                                                                                                                                                                                                                                                                                                                                                                                                                                                                                                                                                                                                                                                                                                                                                                                                                                                                                                                                                                                                                                                                                                                        | 2.378766 | 2.234948 | 2.266287 | 0.000000 |   |   |      |          |  |  |  |  |      |          |          |  |  |  |     |          |          |          |  |  |     |          |          |          |          |  |      |          |          |          |          |          |     |          |          |          |          |          |      |          |          |          |          |          |      |          |          |          |          |          |     |          |          |          |          |          |  |   |   |   |   |  |     |          |  |  |  |  |      |          |          |  |  |  |      |          |          |          |  |  |     |          |          |          |          |  |
| 6 B                                                                                                                              | 1.748380                                                                                                                                                                                                                                                                                                                                                                                                                                                                                                                                                                                                                                                                                                                                                                                                                                                                                                                                                                                                                                                                                                                                                                                                                                                                                                                                                                                                                                                                                        | 1.745320 | 1.732200 | 2.858847 | 2.307436 |   |   |      |          |  |  |  |  |      |          |          |  |  |  |     |          |          |          |  |  |     |          |          |          |          |  |      |          |          |          |          |          |     |          |          |          |          |          |      |          |          |          |          |          |      |          |          |          |          |          |     |          |          |          |          |          |  |   |   |   |   |  |     |          |  |  |  |  |      |          |          |  |  |  |      |          |          |          |  |  |     |          |          |          |          |  |
| 7 Os                                                                                                                             | 3.576785                                                                                                                                                                                                                                                                                                                                                                                                                                                                                                                                                                                                                                                                                                                                                                                                                                                                                                                                                                                                                                                                                                                                                                                                                                                                                                                                                                                                                                                                                        | 2.213192 | 2.234948 | 2.307436 | 3.462864 |   |   |      |          |  |  |  |  |      |          |          |  |  |  |     |          |          |          |  |  |     |          |          |          |          |  |      |          |          |          |          |          |     |          |          |          |          |          |      |          |          |          |          |          |      |          |          |          |          |          |     |          |          |          |          |          |  |   |   |   |   |  |     |          |  |  |  |  |      |          |          |  |  |  |      |          |          |          |  |  |     |          |          |          |          |  |
| 8 B                                                                                                                              | 3.004460                                                                                                                                                                                                                                                                                                                                                                                                                                                                                                                                                                                                                                                                                                                                                                                                                                                                                                                                                                                                                                                                                                                                                                                                                                                                                                                                                                                                                                                                                        | 1.778374 | 2.779848 | 1.745320 | 2.213192 |   |   |      |          |  |  |  |  |      |          |          |  |  |  |     |          |          |          |  |  |     |          |          |          |          |  |      |          |          |          |          |          |     |          |          |          |          |          |      |          |          |          |          |          |      |          |          |          |          |          |     |          |          |          |          |          |  |   |   |   |   |  |     |          |  |  |  |  |      |          |          |  |  |  |      |          |          |          |  |  |     |          |          |          |          |  |
| 9 B                                                                                                                              | 4.458922                                                                                                                                                                                                                                                                                                                                                                                                                                                                                                                                                                                                                                                                                                                                                                                                                                                                                                                                                                                                                                                                                                                                                                                                                                                                                                                                                                                                                                                                                        | 3.004460 | 3.053041 | 1.748380 | 3.576785 |   |   |      |          |  |  |  |  |      |          |          |  |  |  |     |          |          |          |  |  |     |          |          |          |          |  |      |          |          |          |          |          |     |          |          |          |          |          |      |          |          |          |          |          |      |          |          |          |          |          |     |          |          |          |          |          |  |   |   |   |   |  |     |          |  |  |  |  |      |          |          |  |  |  |      |          |          |          |  |  |     |          |          |          |          |  |
|                                                                                                                                  | 6                                                                                                                                                                                                                                                                                                                                                                                                                                                                                                                                                                                                                                                                                                                                                                                                                                                                                                                                                                                                                                                                                                                                                                                                                                                                                                                                                                                                                                                                                               | 7        | 8        | 9        |          |   |   |      |          |  |  |  |  |      |          |          |  |  |  |     |          |          |          |  |  |     |          |          |          |          |  |      |          |          |          |          |          |     |          |          |          |          |          |      |          |          |          |          |          |      |          |          |          |          |          |     |          |          |          |          |          |  |   |   |   |   |  |     |          |  |  |  |  |      |          |          |  |  |  |      |          |          |          |  |  |     |          |          |          |          |  |
| 6 B                                                                                                                              | 0.000000                                                                                                                                                                                                                                                                                                                                                                                                                                                                                                                                                                                                                                                                                                                                                                                                                                                                                                                                                                                                                                                                                                                                                                                                                                                                                                                                                                                                                                                                                        |          |          |          |          |   |   |      |          |  |  |  |  |      |          |          |  |  |  |     |          |          |          |  |  |     |          |          |          |          |  |      |          |          |          |          |          |     |          |          |          |          |          |      |          |          |          |          |          |      |          |          |          |          |          |     |          |          |          |          |          |  |   |   |   |   |  |     |          |  |  |  |  |      |          |          |  |  |  |      |          |          |          |  |  |     |          |          |          |          |  |
| 7 Os                                                                                                                             | 2.266287                                                                                                                                                                                                                                                                                                                                                                                                                                                                                                                                                                                                                                                                                                                                                                                                                                                                                                                                                                                                                                                                                                                                                                                                                                                                                                                                                                                                                                                                                        | 0.000000 |          |          |          |   |   |      |          |  |  |  |  |      |          |          |  |  |  |     |          |          |          |  |  |     |          |          |          |          |  |      |          |          |          |          |          |     |          |          |          |          |          |      |          |          |          |          |          |      |          |          |          |          |          |     |          |          |          |          |          |  |   |   |   |   |  |     |          |  |  |  |  |      |          |          |  |  |  |      |          |          |          |  |  |     |          |          |          |          |  |
| 8 B                                                                                                                              | 2.846465                                                                                                                                                                                                                                                                                                                                                                                                                                                                                                                                                                                                                                                                                                                                                                                                                                                                                                                                                                                                                                                                                                                                                                                                                                                                                                                                                                                                                                                                                        | 2.378766 | 0.000000 |          |          |   |   |      |          |  |  |  |  |      |          |          |  |  |  |     |          |          |          |  |  |     |          |          |          |          |  |      |          |          |          |          |          |     |          |          |          |          |          |      |          |          |          |          |          |      |          |          |          |          |          |     |          |          |          |          |          |  |   |   |   |   |  |     |          |  |  |  |  |      |          |          |  |  |  |      |          |          |          |  |  |     |          |          |          |          |  |
| 9 B                                                                                                                              | 3.663787                                                                                                                                                                                                                                                                                                                                                                                                                                                                                                                                                                                                                                                                                                                                                                                                                                                                                                                                                                                                                                                                                                                                                                                                                                                                                                                                                                                                                                                                                        | 2.011987 | 1.759581 | 0.000000 |          |   |   |      |          |  |  |  |  |      |          |          |  |  |  |     |          |          |          |  |  |     |          |          |          |          |  |      |          |          |          |          |          |     |          |          |          |          |          |      |          |          |          |          |          |      |          |          |          |          |          |     |          |          |          |          |          |  |   |   |   |   |  |     |          |  |  |  |  |      |          |          |  |  |  |      |          |          |          |  |  |     |          |          |          |          |  |
|  <p>5. -746.80552785 +26.6</p>                 | <table border="1"> <thead> <tr> <th></th> <th>1</th> <th>2</th> <th>3</th> <th>4</th> <th>5</th> </tr> </thead> <tbody> <tr><td>1 Os</td><td>0.000000</td><td></td><td></td><td></td><td></td></tr> <tr><td>2 Os</td><td>3.515716</td><td>0.000000</td><td></td><td></td><td></td></tr> <tr><td>3 B</td><td>2.386121</td><td>2.354721</td><td>0.000000</td><td></td><td></td></tr> <tr><td>4 B</td><td>2.196312</td><td>2.115261</td><td>1.814799</td><td>0.000000</td><td></td></tr> <tr><td>5 B</td><td>2.152417</td><td>2.029550</td><td>2.721066</td><td>1.797853</td><td>0.000000</td></tr> <tr><td>6 B</td><td>2.044323</td><td>3.587790</td><td>3.737374</td><td>3.099686</td><td>1.662222</td></tr> <tr><td>7 B</td><td>2.411485</td><td>2.403711</td><td>2.549861</td><td>2.892409</td><td>1.819828</td></tr> <tr><td>8 B</td><td>2.137958</td><td>3.211625</td><td>1.764406</td><td>3.011417</td><td>2.943836</td></tr> <tr><td>9 B</td><td>3.264246</td><td>2.078136</td><td>1.767072</td><td>2.981404</td><td>2.903291</td></tr> <tr><td></td><td>6</td><td>7</td><td>8</td><td>9</td><td></td></tr> <tr><td>6 B</td><td>0.000000</td><td></td><td></td><td></td><td></td></tr> <tr><td>7 B</td><td>2.151926</td><td>0.000000</td><td></td><td></td><td></td></tr> <tr><td>8 B</td><td>3.213997</td><td>1.796083</td><td>0.000000</td><td></td><td></td></tr> <tr><td>9 B</td><td>3.822097</td><td>1.822042</td><td>1.718259</td><td>0.000000</td><td></td></tr> </tbody> </table>  |          | 1        | 2        | 3        | 4 | 5 | 1 Os | 0.000000 |  |  |  |  | 2 Os | 3.515716 | 0.000000 |  |  |  | 3 B | 2.386121 | 2.354721 | 0.000000 |  |  | 4 B | 2.196312 | 2.115261 | 1.814799 | 0.000000 |  | 5 B  | 2.152417 | 2.029550 | 2.721066 | 1.797853 | 0.000000 | 6 B | 2.044323 | 3.587790 | 3.737374 | 3.099686 | 1.662222 | 7 B  | 2.411485 | 2.403711 | 2.549861 | 2.892409 | 1.819828 | 8 B  | 2.137958 | 3.211625 | 1.764406 | 3.011417 | 2.943836 | 9 B | 3.264246 | 2.078136 | 1.767072 | 2.981404 | 2.903291 |  | 6 | 7 | 8 | 9 |  | 6 B | 0.000000 |  |  |  |  | 7 B  | 2.151926 | 0.000000 |  |  |  | 8 B  | 3.213997 | 1.796083 | 0.000000 |  |  | 9 B | 3.822097 | 1.822042 | 1.718259 | 0.000000 |  |
|                                                                                                                                  | 1                                                                                                                                                                                                                                                                                                                                                                                                                                                                                                                                                                                                                                                                                                                                                                                                                                                                                                                                                                                                                                                                                                                                                                                                                                                                                                                                                                                                                                                                                               | 2        | 3        | 4        | 5        |   |   |      |          |  |  |  |  |      |          |          |  |  |  |     |          |          |          |  |  |     |          |          |          |          |  |      |          |          |          |          |          |     |          |          |          |          |          |      |          |          |          |          |          |      |          |          |          |          |          |     |          |          |          |          |          |  |   |   |   |   |  |     |          |  |  |  |  |      |          |          |  |  |  |      |          |          |          |  |  |     |          |          |          |          |  |
| 1 Os                                                                                                                             | 0.000000                                                                                                                                                                                                                                                                                                                                                                                                                                                                                                                                                                                                                                                                                                                                                                                                                                                                                                                                                                                                                                                                                                                                                                                                                                                                                                                                                                                                                                                                                        |          |          |          |          |   |   |      |          |  |  |  |  |      |          |          |  |  |  |     |          |          |          |  |  |     |          |          |          |          |  |      |          |          |          |          |          |     |          |          |          |          |          |      |          |          |          |          |          |      |          |          |          |          |          |     |          |          |          |          |          |  |   |   |   |   |  |     |          |  |  |  |  |      |          |          |  |  |  |      |          |          |          |  |  |     |          |          |          |          |  |
| 2 Os                                                                                                                             | 3.515716                                                                                                                                                                                                                                                                                                                                                                                                                                                                                                                                                                                                                                                                                                                                                                                                                                                                                                                                                                                                                                                                                                                                                                                                                                                                                                                                                                                                                                                                                        | 0.000000 |          |          |          |   |   |      |          |  |  |  |  |      |          |          |  |  |  |     |          |          |          |  |  |     |          |          |          |          |  |      |          |          |          |          |          |     |          |          |          |          |          |      |          |          |          |          |          |      |          |          |          |          |          |     |          |          |          |          |          |  |   |   |   |   |  |     |          |  |  |  |  |      |          |          |  |  |  |      |          |          |          |  |  |     |          |          |          |          |  |
| 3 B                                                                                                                              | 2.386121                                                                                                                                                                                                                                                                                                                                                                                                                                                                                                                                                                                                                                                                                                                                                                                                                                                                                                                                                                                                                                                                                                                                                                                                                                                                                                                                                                                                                                                                                        | 2.354721 | 0.000000 |          |          |   |   |      |          |  |  |  |  |      |          |          |  |  |  |     |          |          |          |  |  |     |          |          |          |          |  |      |          |          |          |          |          |     |          |          |          |          |          |      |          |          |          |          |          |      |          |          |          |          |          |     |          |          |          |          |          |  |   |   |   |   |  |     |          |  |  |  |  |      |          |          |  |  |  |      |          |          |          |  |  |     |          |          |          |          |  |
| 4 B                                                                                                                              | 2.196312                                                                                                                                                                                                                                                                                                                                                                                                                                                                                                                                                                                                                                                                                                                                                                                                                                                                                                                                                                                                                                                                                                                                                                                                                                                                                                                                                                                                                                                                                        | 2.115261 | 1.814799 | 0.000000 |          |   |   |      |          |  |  |  |  |      |          |          |  |  |  |     |          |          |          |  |  |     |          |          |          |          |  |      |          |          |          |          |          |     |          |          |          |          |          |      |          |          |          |          |          |      |          |          |          |          |          |     |          |          |          |          |          |  |   |   |   |   |  |     |          |  |  |  |  |      |          |          |  |  |  |      |          |          |          |  |  |     |          |          |          |          |  |
| 5 B                                                                                                                              | 2.152417                                                                                                                                                                                                                                                                                                                                                                                                                                                                                                                                                                                                                                                                                                                                                                                                                                                                                                                                                                                                                                                                                                                                                                                                                                                                                                                                                                                                                                                                                        | 2.029550 | 2.721066 | 1.797853 | 0.000000 |   |   |      |          |  |  |  |  |      |          |          |  |  |  |     |          |          |          |  |  |     |          |          |          |          |  |      |          |          |          |          |          |     |          |          |          |          |          |      |          |          |          |          |          |      |          |          |          |          |          |     |          |          |          |          |          |  |   |   |   |   |  |     |          |  |  |  |  |      |          |          |  |  |  |      |          |          |          |  |  |     |          |          |          |          |  |
| 6 B                                                                                                                              | 2.044323                                                                                                                                                                                                                                                                                                                                                                                                                                                                                                                                                                                                                                                                                                                                                                                                                                                                                                                                                                                                                                                                                                                                                                                                                                                                                                                                                                                                                                                                                        | 3.587790 | 3.737374 | 3.099686 | 1.662222 |   |   |      |          |  |  |  |  |      |          |          |  |  |  |     |          |          |          |  |  |     |          |          |          |          |  |      |          |          |          |          |          |     |          |          |          |          |          |      |          |          |          |          |          |      |          |          |          |          |          |     |          |          |          |          |          |  |   |   |   |   |  |     |          |  |  |  |  |      |          |          |  |  |  |      |          |          |          |  |  |     |          |          |          |          |  |
| 7 B                                                                                                                              | 2.411485                                                                                                                                                                                                                                                                                                                                                                                                                                                                                                                                                                                                                                                                                                                                                                                                                                                                                                                                                                                                                                                                                                                                                                                                                                                                                                                                                                                                                                                                                        | 2.403711 | 2.549861 | 2.892409 | 1.819828 |   |   |      |          |  |  |  |  |      |          |          |  |  |  |     |          |          |          |  |  |     |          |          |          |          |  |      |          |          |          |          |          |     |          |          |          |          |          |      |          |          |          |          |          |      |          |          |          |          |          |     |          |          |          |          |          |  |   |   |   |   |  |     |          |  |  |  |  |      |          |          |  |  |  |      |          |          |          |  |  |     |          |          |          |          |  |
| 8 B                                                                                                                              | 2.137958                                                                                                                                                                                                                                                                                                                                                                                                                                                                                                                                                                                                                                                                                                                                                                                                                                                                                                                                                                                                                                                                                                                                                                                                                                                                                                                                                                                                                                                                                        | 3.211625 | 1.764406 | 3.011417 | 2.943836 |   |   |      |          |  |  |  |  |      |          |          |  |  |  |     |          |          |          |  |  |     |          |          |          |          |  |      |          |          |          |          |          |     |          |          |          |          |          |      |          |          |          |          |          |      |          |          |          |          |          |     |          |          |          |          |          |  |   |   |   |   |  |     |          |  |  |  |  |      |          |          |  |  |  |      |          |          |          |  |  |     |          |          |          |          |  |
| 9 B                                                                                                                              | 3.264246                                                                                                                                                                                                                                                                                                                                                                                                                                                                                                                                                                                                                                                                                                                                                                                                                                                                                                                                                                                                                                                                                                                                                                                                                                                                                                                                                                                                                                                                                        | 2.078136 | 1.767072 | 2.981404 | 2.903291 |   |   |      |          |  |  |  |  |      |          |          |  |  |  |     |          |          |          |  |  |     |          |          |          |          |  |      |          |          |          |          |          |     |          |          |          |          |          |      |          |          |          |          |          |      |          |          |          |          |          |     |          |          |          |          |          |  |   |   |   |   |  |     |          |  |  |  |  |      |          |          |  |  |  |      |          |          |          |  |  |     |          |          |          |          |  |
|                                                                                                                                  | 6                                                                                                                                                                                                                                                                                                                                                                                                                                                                                                                                                                                                                                                                                                                                                                                                                                                                                                                                                                                                                                                                                                                                                                                                                                                                                                                                                                                                                                                                                               | 7        | 8        | 9        |          |   |   |      |          |  |  |  |  |      |          |          |  |  |  |     |          |          |          |  |  |     |          |          |          |          |  |      |          |          |          |          |          |     |          |          |          |          |          |      |          |          |          |          |          |      |          |          |          |          |          |     |          |          |          |          |          |  |   |   |   |   |  |     |          |  |  |  |  |      |          |          |  |  |  |      |          |          |          |  |  |     |          |          |          |          |  |
| 6 B                                                                                                                              | 0.000000                                                                                                                                                                                                                                                                                                                                                                                                                                                                                                                                                                                                                                                                                                                                                                                                                                                                                                                                                                                                                                                                                                                                                                                                                                                                                                                                                                                                                                                                                        |          |          |          |          |   |   |      |          |  |  |  |  |      |          |          |  |  |  |     |          |          |          |  |  |     |          |          |          |          |  |      |          |          |          |          |          |     |          |          |          |          |          |      |          |          |          |          |          |      |          |          |          |          |          |     |          |          |          |          |          |  |   |   |   |   |  |     |          |  |  |  |  |      |          |          |  |  |  |      |          |          |          |  |  |     |          |          |          |          |  |
| 7 B                                                                                                                              | 2.151926                                                                                                                                                                                                                                                                                                                                                                                                                                                                                                                                                                                                                                                                                                                                                                                                                                                                                                                                                                                                                                                                                                                                                                                                                                                                                                                                                                                                                                                                                        | 0.000000 |          |          |          |   |   |      |          |  |  |  |  |      |          |          |  |  |  |     |          |          |          |  |  |     |          |          |          |          |  |      |          |          |          |          |          |     |          |          |          |          |          |      |          |          |          |          |          |      |          |          |          |          |          |     |          |          |          |          |          |  |   |   |   |   |  |     |          |  |  |  |  |      |          |          |  |  |  |      |          |          |          |  |  |     |          |          |          |          |  |
| 8 B                                                                                                                              | 3.213997                                                                                                                                                                                                                                                                                                                                                                                                                                                                                                                                                                                                                                                                                                                                                                                                                                                                                                                                                                                                                                                                                                                                                                                                                                                                                                                                                                                                                                                                                        | 1.796083 | 0.000000 |          |          |   |   |      |          |  |  |  |  |      |          |          |  |  |  |     |          |          |          |  |  |     |          |          |          |          |  |      |          |          |          |          |          |     |          |          |          |          |          |      |          |          |          |          |          |      |          |          |          |          |          |     |          |          |          |          |          |  |   |   |   |   |  |     |          |  |  |  |  |      |          |          |  |  |  |      |          |          |          |  |  |     |          |          |          |          |  |
| 9 B                                                                                                                              | 3.822097                                                                                                                                                                                                                                                                                                                                                                                                                                                                                                                                                                                                                                                                                                                                                                                                                                                                                                                                                                                                                                                                                                                                                                                                                                                                                                                                                                                                                                                                                        | 1.822042 | 1.718259 | 0.000000 |          |   |   |      |          |  |  |  |  |      |          |          |  |  |  |     |          |          |          |  |  |     |          |          |          |          |  |      |          |          |          |          |          |     |          |          |          |          |          |      |          |          |          |          |          |      |          |          |          |          |          |     |          |          |          |          |          |  |   |   |   |   |  |     |          |  |  |  |  |      |          |          |  |  |  |      |          |          |          |  |  |     |          |          |          |          |  |
|  <p>6. -746.80536618 +26.7 C<sub>2v</sub></p> | <table border="1"> <thead> <tr> <th></th> <th>1</th> <th>2</th> <th>3</th> <th>4</th> <th>5</th> </tr> </thead> <tbody> <tr><td>1 B</td><td>0.000000</td><td></td><td></td><td></td><td></td></tr> <tr><td>2 B</td><td>2.343333</td><td>0.000000</td><td></td><td></td><td></td></tr> <tr><td>3 B</td><td>1.808400</td><td>1.808400</td><td>0.000000</td><td></td><td></td></tr> <tr><td>4 B</td><td>1.897712</td><td>1.906636</td><td>1.638694</td><td>0.000000</td><td></td></tr> <tr><td>5 Os</td><td>2.393981</td><td>2.378915</td><td>3.240253</td><td>2.082620</td><td>0.000000</td></tr> <tr><td>6 B</td><td>3.263243</td><td>1.877457</td><td>3.562854</td><td>3.158001</td><td>2.073023</td></tr> <tr><td>7 B</td><td>1.877476</td><td>3.263325</td><td>3.562896</td><td>3.138570</td><td>2.076906</td></tr> <tr><td>8 Os</td><td>2.378915</td><td>2.393981</td><td>3.240253</td><td>3.476470</td><td>2.763800</td></tr> <tr><td>9 B</td><td>1.906636</td><td>1.897712</td><td>1.638694</td><td>2.803952</td><td>3.476470</td></tr> <tr><td></td><td>6</td><td>7</td><td>8</td><td>9</td><td></td></tr> <tr><td>6 B</td><td>0.000000</td><td></td><td></td><td></td><td></td></tr> <tr><td>7 B</td><td>3.040303</td><td>0.000000</td><td></td><td></td><td></td></tr> <tr><td>8 Os</td><td>2.076833</td><td>2.073096</td><td>0.000000</td><td></td><td></td></tr> <tr><td>9 B</td><td>3.138522</td><td>3.158050</td><td>2.082620</td><td>0.000000</td><td></td></tr> </tbody> </table> |          | 1        | 2        | 3        | 4 | 5 | 1 B  | 0.000000 |  |  |  |  | 2 B  | 2.343333 | 0.000000 |  |  |  | 3 B | 1.808400 | 1.808400 | 0.000000 |  |  | 4 B | 1.897712 | 1.906636 | 1.638694 | 0.000000 |  | 5 Os | 2.393981 | 2.378915 | 3.240253 | 2.082620 | 0.000000 | 6 B | 3.263243 | 1.877457 | 3.562854 | 3.158001 | 2.073023 | 7 B  | 1.877476 | 3.263325 | 3.562896 | 3.138570 | 2.076906 | 8 Os | 2.378915 | 2.393981 | 3.240253 | 3.476470 | 2.763800 | 9 B | 1.906636 | 1.897712 | 1.638694 | 2.803952 | 3.476470 |  | 6 | 7 | 8 | 9 |  | 6 B | 0.000000 |  |  |  |  | 7 B  | 3.040303 | 0.000000 |  |  |  | 8 Os | 2.076833 | 2.073096 | 0.000000 |  |  | 9 B | 3.138522 | 3.158050 | 2.082620 | 0.000000 |  |
|                                                                                                                                  | 1                                                                                                                                                                                                                                                                                                                                                                                                                                                                                                                                                                                                                                                                                                                                                                                                                                                                                                                                                                                                                                                                                                                                                                                                                                                                                                                                                                                                                                                                                               | 2        | 3        | 4        | 5        |   |   |      |          |  |  |  |  |      |          |          |  |  |  |     |          |          |          |  |  |     |          |          |          |          |  |      |          |          |          |          |          |     |          |          |          |          |          |      |          |          |          |          |          |      |          |          |          |          |          |     |          |          |          |          |          |  |   |   |   |   |  |     |          |  |  |  |  |      |          |          |  |  |  |      |          |          |          |  |  |     |          |          |          |          |  |
| 1 B                                                                                                                              | 0.000000                                                                                                                                                                                                                                                                                                                                                                                                                                                                                                                                                                                                                                                                                                                                                                                                                                                                                                                                                                                                                                                                                                                                                                                                                                                                                                                                                                                                                                                                                        |          |          |          |          |   |   |      |          |  |  |  |  |      |          |          |  |  |  |     |          |          |          |  |  |     |          |          |          |          |  |      |          |          |          |          |          |     |          |          |          |          |          |      |          |          |          |          |          |      |          |          |          |          |          |     |          |          |          |          |          |  |   |   |   |   |  |     |          |  |  |  |  |      |          |          |  |  |  |      |          |          |          |  |  |     |          |          |          |          |  |
| 2 B                                                                                                                              | 2.343333                                                                                                                                                                                                                                                                                                                                                                                                                                                                                                                                                                                                                                                                                                                                                                                                                                                                                                                                                                                                                                                                                                                                                                                                                                                                                                                                                                                                                                                                                        | 0.000000 |          |          |          |   |   |      |          |  |  |  |  |      |          |          |  |  |  |     |          |          |          |  |  |     |          |          |          |          |  |      |          |          |          |          |          |     |          |          |          |          |          |      |          |          |          |          |          |      |          |          |          |          |          |     |          |          |          |          |          |  |   |   |   |   |  |     |          |  |  |  |  |      |          |          |  |  |  |      |          |          |          |  |  |     |          |          |          |          |  |
| 3 B                                                                                                                              | 1.808400                                                                                                                                                                                                                                                                                                                                                                                                                                                                                                                                                                                                                                                                                                                                                                                                                                                                                                                                                                                                                                                                                                                                                                                                                                                                                                                                                                                                                                                                                        | 1.808400 | 0.000000 |          |          |   |   |      |          |  |  |  |  |      |          |          |  |  |  |     |          |          |          |  |  |     |          |          |          |          |  |      |          |          |          |          |          |     |          |          |          |          |          |      |          |          |          |          |          |      |          |          |          |          |          |     |          |          |          |          |          |  |   |   |   |   |  |     |          |  |  |  |  |      |          |          |  |  |  |      |          |          |          |  |  |     |          |          |          |          |  |
| 4 B                                                                                                                              | 1.897712                                                                                                                                                                                                                                                                                                                                                                                                                                                                                                                                                                                                                                                                                                                                                                                                                                                                                                                                                                                                                                                                                                                                                                                                                                                                                                                                                                                                                                                                                        | 1.906636 | 1.638694 | 0.000000 |          |   |   |      |          |  |  |  |  |      |          |          |  |  |  |     |          |          |          |  |  |     |          |          |          |          |  |      |          |          |          |          |          |     |          |          |          |          |          |      |          |          |          |          |          |      |          |          |          |          |          |     |          |          |          |          |          |  |   |   |   |   |  |     |          |  |  |  |  |      |          |          |  |  |  |      |          |          |          |  |  |     |          |          |          |          |  |
| 5 Os                                                                                                                             | 2.393981                                                                                                                                                                                                                                                                                                                                                                                                                                                                                                                                                                                                                                                                                                                                                                                                                                                                                                                                                                                                                                                                                                                                                                                                                                                                                                                                                                                                                                                                                        | 2.378915 | 3.240253 | 2.082620 | 0.000000 |   |   |      |          |  |  |  |  |      |          |          |  |  |  |     |          |          |          |  |  |     |          |          |          |          |  |      |          |          |          |          |          |     |          |          |          |          |          |      |          |          |          |          |          |      |          |          |          |          |          |     |          |          |          |          |          |  |   |   |   |   |  |     |          |  |  |  |  |      |          |          |  |  |  |      |          |          |          |  |  |     |          |          |          |          |  |
| 6 B                                                                                                                              | 3.263243                                                                                                                                                                                                                                                                                                                                                                                                                                                                                                                                                                                                                                                                                                                                                                                                                                                                                                                                                                                                                                                                                                                                                                                                                                                                                                                                                                                                                                                                                        | 1.877457 | 3.562854 | 3.158001 | 2.073023 |   |   |      |          |  |  |  |  |      |          |          |  |  |  |     |          |          |          |  |  |     |          |          |          |          |  |      |          |          |          |          |          |     |          |          |          |          |          |      |          |          |          |          |          |      |          |          |          |          |          |     |          |          |          |          |          |  |   |   |   |   |  |     |          |  |  |  |  |      |          |          |  |  |  |      |          |          |          |  |  |     |          |          |          |          |  |
| 7 B                                                                                                                              | 1.877476                                                                                                                                                                                                                                                                                                                                                                                                                                                                                                                                                                                                                                                                                                                                                                                                                                                                                                                                                                                                                                                                                                                                                                                                                                                                                                                                                                                                                                                                                        | 3.263325 | 3.562896 | 3.138570 | 2.076906 |   |   |      |          |  |  |  |  |      |          |          |  |  |  |     |          |          |          |  |  |     |          |          |          |          |  |      |          |          |          |          |          |     |          |          |          |          |          |      |          |          |          |          |          |      |          |          |          |          |          |     |          |          |          |          |          |  |   |   |   |   |  |     |          |  |  |  |  |      |          |          |  |  |  |      |          |          |          |  |  |     |          |          |          |          |  |
| 8 Os                                                                                                                             | 2.378915                                                                                                                                                                                                                                                                                                                                                                                                                                                                                                                                                                                                                                                                                                                                                                                                                                                                                                                                                                                                                                                                                                                                                                                                                                                                                                                                                                                                                                                                                        | 2.393981 | 3.240253 | 3.476470 | 2.763800 |   |   |      |          |  |  |  |  |      |          |          |  |  |  |     |          |          |          |  |  |     |          |          |          |          |  |      |          |          |          |          |          |     |          |          |          |          |          |      |          |          |          |          |          |      |          |          |          |          |          |     |          |          |          |          |          |  |   |   |   |   |  |     |          |  |  |  |  |      |          |          |  |  |  |      |          |          |          |  |  |     |          |          |          |          |  |
| 9 B                                                                                                                              | 1.906636                                                                                                                                                                                                                                                                                                                                                                                                                                                                                                                                                                                                                                                                                                                                                                                                                                                                                                                                                                                                                                                                                                                                                                                                                                                                                                                                                                                                                                                                                        | 1.897712 | 1.638694 | 2.803952 | 3.476470 |   |   |      |          |  |  |  |  |      |          |          |  |  |  |     |          |          |          |  |  |     |          |          |          |          |  |      |          |          |          |          |          |     |          |          |          |          |          |      |          |          |          |          |          |      |          |          |          |          |          |     |          |          |          |          |          |  |   |   |   |   |  |     |          |  |  |  |  |      |          |          |  |  |  |      |          |          |          |  |  |     |          |          |          |          |  |
|                                                                                                                                  | 6                                                                                                                                                                                                                                                                                                                                                                                                                                                                                                                                                                                                                                                                                                                                                                                                                                                                                                                                                                                                                                                                                                                                                                                                                                                                                                                                                                                                                                                                                               | 7        | 8        | 9        |          |   |   |      |          |  |  |  |  |      |          |          |  |  |  |     |          |          |          |  |  |     |          |          |          |          |  |      |          |          |          |          |          |     |          |          |          |          |          |      |          |          |          |          |          |      |          |          |          |          |          |     |          |          |          |          |          |  |   |   |   |   |  |     |          |  |  |  |  |      |          |          |  |  |  |      |          |          |          |  |  |     |          |          |          |          |  |
| 6 B                                                                                                                              | 0.000000                                                                                                                                                                                                                                                                                                                                                                                                                                                                                                                                                                                                                                                                                                                                                                                                                                                                                                                                                                                                                                                                                                                                                                                                                                                                                                                                                                                                                                                                                        |          |          |          |          |   |   |      |          |  |  |  |  |      |          |          |  |  |  |     |          |          |          |  |  |     |          |          |          |          |  |      |          |          |          |          |          |     |          |          |          |          |          |      |          |          |          |          |          |      |          |          |          |          |          |     |          |          |          |          |          |  |   |   |   |   |  |     |          |  |  |  |  |      |          |          |  |  |  |      |          |          |          |  |  |     |          |          |          |          |  |
| 7 B                                                                                                                              | 3.040303                                                                                                                                                                                                                                                                                                                                                                                                                                                                                                                                                                                                                                                                                                                                                                                                                                                                                                                                                                                                                                                                                                                                                                                                                                                                                                                                                                                                                                                                                        | 0.000000 |          |          |          |   |   |      |          |  |  |  |  |      |          |          |  |  |  |     |          |          |          |  |  |     |          |          |          |          |  |      |          |          |          |          |          |     |          |          |          |          |          |      |          |          |          |          |          |      |          |          |          |          |          |     |          |          |          |          |          |  |   |   |   |   |  |     |          |  |  |  |  |      |          |          |  |  |  |      |          |          |          |  |  |     |          |          |          |          |  |
| 8 Os                                                                                                                             | 2.076833                                                                                                                                                                                                                                                                                                                                                                                                                                                                                                                                                                                                                                                                                                                                                                                                                                                                                                                                                                                                                                                                                                                                                                                                                                                                                                                                                                                                                                                                                        | 2.073096 | 0.000000 |          |          |   |   |      |          |  |  |  |  |      |          |          |  |  |  |     |          |          |          |  |  |     |          |          |          |          |  |      |          |          |          |          |          |     |          |          |          |          |          |      |          |          |          |          |          |      |          |          |          |          |          |     |          |          |          |          |          |  |   |   |   |   |  |     |          |  |  |  |  |      |          |          |  |  |  |      |          |          |          |  |  |     |          |          |          |          |  |
| 9 B                                                                                                                              | 3.138522                                                                                                                                                                                                                                                                                                                                                                                                                                                                                                                                                                                                                                                                                                                                                                                                                                                                                                                                                                                                                                                                                                                                                                                                                                                                                                                                                                                                                                                                                        | 3.158050 | 2.082620 | 0.000000 |          |   |   |      |          |  |  |  |  |      |          |          |  |  |  |     |          |          |          |  |  |     |          |          |          |          |  |      |          |          |          |          |          |     |          |          |          |          |          |      |          |          |          |          |          |      |          |          |          |          |          |     |          |          |          |          |          |  |   |   |   |   |  |     |          |  |  |  |  |      |          |          |  |  |  |      |          |          |          |  |  |     |          |          |          |          |  |

| 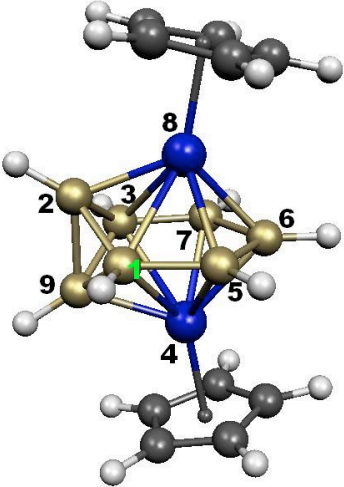 <p>7. -746.80279011 +28.3 <math>C_{2v}</math></p> | <table border="1"> <thead> <tr> <th></th> <th>1</th> <th>2</th> <th>3</th> <th>4</th> <th>5</th> </tr> </thead> <tbody> <tr><td>1 B</td><td>0.000000</td><td></td><td></td><td></td><td></td></tr> <tr><td>2 B</td><td>1.749283</td><td>0.000000</td><td></td><td></td><td></td></tr> <tr><td>3 B</td><td>2.506800</td><td>1.749283</td><td>0.000000</td><td></td><td></td></tr> <tr><td>4 Os</td><td>2.361499</td><td>3.216969</td><td>2.361499</td><td>0.000000</td><td></td></tr> <tr><td>5 B</td><td>1.683937</td><td>3.016925</td><td>3.165697</td><td>2.218406</td><td>0.000000</td></tr> <tr><td>6 B</td><td>2.930475</td><td>3.586737</td><td>2.930475</td><td>2.187640</td><td>1.733261</td></tr> <tr><td>7 B</td><td>3.165697</td><td>3.016925</td><td>1.683937</td><td>2.218406</td><td>2.866600</td></tr> <tr><td>8 Os</td><td>2.361499</td><td>2.124807</td><td>2.361499</td><td>3.237200</td><td>2.218406</td></tr> <tr><td>9 B</td><td>1.749283</td><td>1.802200</td><td>1.749283</td><td>2.124807</td><td>3.016925</td></tr> <tr> <td></td> <td>6</td> <td>7</td> <td>8</td> <td>9</td> <td></td> </tr> <tr><td>6 B</td><td>0.000000</td><td></td><td></td><td></td><td></td></tr> <tr><td>7 B</td><td>1.733261</td><td>0.000000</td><td></td><td></td><td></td></tr> <tr><td>8 Os</td><td>2.187640</td><td>2.218406</td><td>0.000000</td><td></td><td></td></tr> <tr><td>9 B</td><td>3.586737</td><td>3.016925</td><td>3.216969</td><td>0.000000</td><td></td></tr> </tbody> </table>  |          | 1        | 2        | 3        | 4 | 5 | 1 B  | 0.000000 |  |  |  |  | 2 B | 1.749283 | 0.000000 |  |  |  | 3 B  | 2.506800 | 1.749283 | 0.000000 |  |  | 4 Os | 2.361499 | 3.216969 | 2.361499 | 0.000000 |  | 5 B | 1.683937 | 3.016925 | 3.165697 | 2.218406 | 0.000000 | 6 B  | 2.930475 | 3.586737 | 2.930475 | 2.187640 | 1.733261 | 7 B | 3.165697 | 3.016925 | 1.683937 | 2.218406 | 2.866600 | 8 Os | 2.361499 | 2.124807 | 2.361499 | 3.237200 | 2.218406 | 9 B  | 1.749283 | 1.802200 | 1.749283 | 2.124807 | 3.016925 |  | 6 | 7 | 8 | 9 |  | 6 B  | 0.000000 |  |  |  |  | 7 B | 1.733261 | 0.000000 |  |  |  | 8 Os | 2.187640 | 2.218406 | 0.000000 |  |  | 9 B  | 3.586737 | 3.016925 | 3.216969 | 0.000000 |  |
|-------------------------------------------------------------------------------------------------------------------------------------|---------------------------------------------------------------------------------------------------------------------------------------------------------------------------------------------------------------------------------------------------------------------------------------------------------------------------------------------------------------------------------------------------------------------------------------------------------------------------------------------------------------------------------------------------------------------------------------------------------------------------------------------------------------------------------------------------------------------------------------------------------------------------------------------------------------------------------------------------------------------------------------------------------------------------------------------------------------------------------------------------------------------------------------------------------------------------------------------------------------------------------------------------------------------------------------------------------------------------------------------------------------------------------------------------------------------------------------------------------------------------------------------------------------------------------------------------------------------------------------------------------|----------|----------|----------|----------|---|---|------|----------|--|--|--|--|-----|----------|----------|--|--|--|------|----------|----------|----------|--|--|------|----------|----------|----------|----------|--|-----|----------|----------|----------|----------|----------|------|----------|----------|----------|----------|----------|-----|----------|----------|----------|----------|----------|------|----------|----------|----------|----------|----------|------|----------|----------|----------|----------|----------|--|---|---|---|---|--|------|----------|--|--|--|--|-----|----------|----------|--|--|--|------|----------|----------|----------|--|--|------|----------|----------|----------|----------|--|
|                                                                                                                                     | 1                                                                                                                                                                                                                                                                                                                                                                                                                                                                                                                                                                                                                                                                                                                                                                                                                                                                                                                                                                                                                                                                                                                                                                                                                                                                                                                                                                                                                                                                                                       | 2        | 3        | 4        | 5        |   |   |      |          |  |  |  |  |     |          |          |  |  |  |      |          |          |          |  |  |      |          |          |          |          |  |     |          |          |          |          |          |      |          |          |          |          |          |     |          |          |          |          |          |      |          |          |          |          |          |      |          |          |          |          |          |  |   |   |   |   |  |      |          |  |  |  |  |     |          |          |  |  |  |      |          |          |          |  |  |      |          |          |          |          |  |
| 1 B                                                                                                                                 | 0.000000                                                                                                                                                                                                                                                                                                                                                                                                                                                                                                                                                                                                                                                                                                                                                                                                                                                                                                                                                                                                                                                                                                                                                                                                                                                                                                                                                                                                                                                                                                |          |          |          |          |   |   |      |          |  |  |  |  |     |          |          |  |  |  |      |          |          |          |  |  |      |          |          |          |          |  |     |          |          |          |          |          |      |          |          |          |          |          |     |          |          |          |          |          |      |          |          |          |          |          |      |          |          |          |          |          |  |   |   |   |   |  |      |          |  |  |  |  |     |          |          |  |  |  |      |          |          |          |  |  |      |          |          |          |          |  |
| 2 B                                                                                                                                 | 1.749283                                                                                                                                                                                                                                                                                                                                                                                                                                                                                                                                                                                                                                                                                                                                                                                                                                                                                                                                                                                                                                                                                                                                                                                                                                                                                                                                                                                                                                                                                                | 0.000000 |          |          |          |   |   |      |          |  |  |  |  |     |          |          |  |  |  |      |          |          |          |  |  |      |          |          |          |          |  |     |          |          |          |          |          |      |          |          |          |          |          |     |          |          |          |          |          |      |          |          |          |          |          |      |          |          |          |          |          |  |   |   |   |   |  |      |          |  |  |  |  |     |          |          |  |  |  |      |          |          |          |  |  |      |          |          |          |          |  |
| 3 B                                                                                                                                 | 2.506800                                                                                                                                                                                                                                                                                                                                                                                                                                                                                                                                                                                                                                                                                                                                                                                                                                                                                                                                                                                                                                                                                                                                                                                                                                                                                                                                                                                                                                                                                                | 1.749283 | 0.000000 |          |          |   |   |      |          |  |  |  |  |     |          |          |  |  |  |      |          |          |          |  |  |      |          |          |          |          |  |     |          |          |          |          |          |      |          |          |          |          |          |     |          |          |          |          |          |      |          |          |          |          |          |      |          |          |          |          |          |  |   |   |   |   |  |      |          |  |  |  |  |     |          |          |  |  |  |      |          |          |          |  |  |      |          |          |          |          |  |
| 4 Os                                                                                                                                | 2.361499                                                                                                                                                                                                                                                                                                                                                                                                                                                                                                                                                                                                                                                                                                                                                                                                                                                                                                                                                                                                                                                                                                                                                                                                                                                                                                                                                                                                                                                                                                | 3.216969 | 2.361499 | 0.000000 |          |   |   |      |          |  |  |  |  |     |          |          |  |  |  |      |          |          |          |  |  |      |          |          |          |          |  |     |          |          |          |          |          |      |          |          |          |          |          |     |          |          |          |          |          |      |          |          |          |          |          |      |          |          |          |          |          |  |   |   |   |   |  |      |          |  |  |  |  |     |          |          |  |  |  |      |          |          |          |  |  |      |          |          |          |          |  |
| 5 B                                                                                                                                 | 1.683937                                                                                                                                                                                                                                                                                                                                                                                                                                                                                                                                                                                                                                                                                                                                                                                                                                                                                                                                                                                                                                                                                                                                                                                                                                                                                                                                                                                                                                                                                                | 3.016925 | 3.165697 | 2.218406 | 0.000000 |   |   |      |          |  |  |  |  |     |          |          |  |  |  |      |          |          |          |  |  |      |          |          |          |          |  |     |          |          |          |          |          |      |          |          |          |          |          |     |          |          |          |          |          |      |          |          |          |          |          |      |          |          |          |          |          |  |   |   |   |   |  |      |          |  |  |  |  |     |          |          |  |  |  |      |          |          |          |  |  |      |          |          |          |          |  |
| 6 B                                                                                                                                 | 2.930475                                                                                                                                                                                                                                                                                                                                                                                                                                                                                                                                                                                                                                                                                                                                                                                                                                                                                                                                                                                                                                                                                                                                                                                                                                                                                                                                                                                                                                                                                                | 3.586737 | 2.930475 | 2.187640 | 1.733261 |   |   |      |          |  |  |  |  |     |          |          |  |  |  |      |          |          |          |  |  |      |          |          |          |          |  |     |          |          |          |          |          |      |          |          |          |          |          |     |          |          |          |          |          |      |          |          |          |          |          |      |          |          |          |          |          |  |   |   |   |   |  |      |          |  |  |  |  |     |          |          |  |  |  |      |          |          |          |  |  |      |          |          |          |          |  |
| 7 B                                                                                                                                 | 3.165697                                                                                                                                                                                                                                                                                                                                                                                                                                                                                                                                                                                                                                                                                                                                                                                                                                                                                                                                                                                                                                                                                                                                                                                                                                                                                                                                                                                                                                                                                                | 3.016925 | 1.683937 | 2.218406 | 2.866600 |   |   |      |          |  |  |  |  |     |          |          |  |  |  |      |          |          |          |  |  |      |          |          |          |          |  |     |          |          |          |          |          |      |          |          |          |          |          |     |          |          |          |          |          |      |          |          |          |          |          |      |          |          |          |          |          |  |   |   |   |   |  |      |          |  |  |  |  |     |          |          |  |  |  |      |          |          |          |  |  |      |          |          |          |          |  |
| 8 Os                                                                                                                                | 2.361499                                                                                                                                                                                                                                                                                                                                                                                                                                                                                                                                                                                                                                                                                                                                                                                                                                                                                                                                                                                                                                                                                                                                                                                                                                                                                                                                                                                                                                                                                                | 2.124807 | 2.361499 | 3.237200 | 2.218406 |   |   |      |          |  |  |  |  |     |          |          |  |  |  |      |          |          |          |  |  |      |          |          |          |          |  |     |          |          |          |          |          |      |          |          |          |          |          |     |          |          |          |          |          |      |          |          |          |          |          |      |          |          |          |          |          |  |   |   |   |   |  |      |          |  |  |  |  |     |          |          |  |  |  |      |          |          |          |  |  |      |          |          |          |          |  |
| 9 B                                                                                                                                 | 1.749283                                                                                                                                                                                                                                                                                                                                                                                                                                                                                                                                                                                                                                                                                                                                                                                                                                                                                                                                                                                                                                                                                                                                                                                                                                                                                                                                                                                                                                                                                                | 1.802200 | 1.749283 | 2.124807 | 3.016925 |   |   |      |          |  |  |  |  |     |          |          |  |  |  |      |          |          |          |  |  |      |          |          |          |          |  |     |          |          |          |          |          |      |          |          |          |          |          |     |          |          |          |          |          |      |          |          |          |          |          |      |          |          |          |          |          |  |   |   |   |   |  |      |          |  |  |  |  |     |          |          |  |  |  |      |          |          |          |  |  |      |          |          |          |          |  |
|                                                                                                                                     | 6                                                                                                                                                                                                                                                                                                                                                                                                                                                                                                                                                                                                                                                                                                                                                                                                                                                                                                                                                                                                                                                                                                                                                                                                                                                                                                                                                                                                                                                                                                       | 7        | 8        | 9        |          |   |   |      |          |  |  |  |  |     |          |          |  |  |  |      |          |          |          |  |  |      |          |          |          |          |  |     |          |          |          |          |          |      |          |          |          |          |          |     |          |          |          |          |          |      |          |          |          |          |          |      |          |          |          |          |          |  |   |   |   |   |  |      |          |  |  |  |  |     |          |          |  |  |  |      |          |          |          |  |  |      |          |          |          |          |  |
| 6 B                                                                                                                                 | 0.000000                                                                                                                                                                                                                                                                                                                                                                                                                                                                                                                                                                                                                                                                                                                                                                                                                                                                                                                                                                                                                                                                                                                                                                                                                                                                                                                                                                                                                                                                                                |          |          |          |          |   |   |      |          |  |  |  |  |     |          |          |  |  |  |      |          |          |          |  |  |      |          |          |          |          |  |     |          |          |          |          |          |      |          |          |          |          |          |     |          |          |          |          |          |      |          |          |          |          |          |      |          |          |          |          |          |  |   |   |   |   |  |      |          |  |  |  |  |     |          |          |  |  |  |      |          |          |          |  |  |      |          |          |          |          |  |
| 7 B                                                                                                                                 | 1.733261                                                                                                                                                                                                                                                                                                                                                                                                                                                                                                                                                                                                                                                                                                                                                                                                                                                                                                                                                                                                                                                                                                                                                                                                                                                                                                                                                                                                                                                                                                | 0.000000 |          |          |          |   |   |      |          |  |  |  |  |     |          |          |  |  |  |      |          |          |          |  |  |      |          |          |          |          |  |     |          |          |          |          |          |      |          |          |          |          |          |     |          |          |          |          |          |      |          |          |          |          |          |      |          |          |          |          |          |  |   |   |   |   |  |      |          |  |  |  |  |     |          |          |  |  |  |      |          |          |          |  |  |      |          |          |          |          |  |
| 8 Os                                                                                                                                | 2.187640                                                                                                                                                                                                                                                                                                                                                                                                                                                                                                                                                                                                                                                                                                                                                                                                                                                                                                                                                                                                                                                                                                                                                                                                                                                                                                                                                                                                                                                                                                | 2.218406 | 0.000000 |          |          |   |   |      |          |  |  |  |  |     |          |          |  |  |  |      |          |          |          |  |  |      |          |          |          |          |  |     |          |          |          |          |          |      |          |          |          |          |          |     |          |          |          |          |          |      |          |          |          |          |          |      |          |          |          |          |          |  |   |   |   |   |  |      |          |  |  |  |  |     |          |          |  |  |  |      |          |          |          |  |  |      |          |          |          |          |  |
| 9 B                                                                                                                                 | 3.586737                                                                                                                                                                                                                                                                                                                                                                                                                                                                                                                                                                                                                                                                                                                                                                                                                                                                                                                                                                                                                                                                                                                                                                                                                                                                                                                                                                                                                                                                                                | 3.016925 | 3.216969 | 0.000000 |          |   |   |      |          |  |  |  |  |     |          |          |  |  |  |      |          |          |          |  |  |      |          |          |          |          |  |     |          |          |          |          |          |      |          |          |          |          |          |     |          |          |          |          |          |      |          |          |          |          |          |      |          |          |          |          |          |  |   |   |   |   |  |      |          |  |  |  |  |     |          |          |  |  |  |      |          |          |          |  |  |      |          |          |          |          |  |
|  <p>8. -746.80240548 +28.6 <math>C_s</math></p>   | <table border="1"> <thead> <tr> <th></th> <th>1</th> <th>2</th> <th>3</th> <th>4</th> <th>5</th> </tr> </thead> <tbody> <tr><td>1 Os</td><td>0.000000</td><td></td><td></td><td></td><td></td></tr> <tr><td>2 B</td><td>2.192071</td><td>0.000000</td><td></td><td></td><td></td></tr> <tr><td>3 Os</td><td>2.754600</td><td>3.059442</td><td>0.000000</td><td></td><td></td></tr> <tr><td>4 B</td><td>3.059442</td><td>1.653600</td><td>2.192071</td><td>0.000000</td><td></td></tr> <tr><td>5 B</td><td>2.259319</td><td>1.748615</td><td>2.259319</td><td>1.748615</td><td>0.000000</td></tr> <tr><td>6 B</td><td>2.298654</td><td>1.754680</td><td>2.298654</td><td>1.754680</td><td>2.583725</td></tr> <tr><td>7 B</td><td>2.159627</td><td>3.209789</td><td>2.159627</td><td>3.209789</td><td>3.371687</td></tr> <tr><td>8 B</td><td>2.258963</td><td>3.705490</td><td>2.258963</td><td>3.705490</td><td>2.515437</td></tr> <tr><td>9 B</td><td>2.262963</td><td>3.995736</td><td>2.262963</td><td>3.995736</td><td>3.391114</td></tr> <tr> <td></td> <td>6</td> <td>7</td> <td>8</td> <td>9</td> <td></td> </tr> <tr><td>6 B</td><td>0.000000</td><td></td><td></td><td></td><td></td></tr> <tr><td>7 B</td><td>1.866603</td><td>0.000000</td><td></td><td></td><td></td></tr> <tr><td>8 B</td><td>3.630860</td><td>2.928537</td><td>0.000000</td><td></td><td></td></tr> <tr><td>9 B</td><td>3.258136</td><td>1.814608</td><td>1.593592</td><td>0.000000</td><td></td></tr> </tbody> </table>   |          | 1        | 2        | 3        | 4 | 5 | 1 Os | 0.000000 |  |  |  |  | 2 B | 2.192071 | 0.000000 |  |  |  | 3 Os | 2.754600 | 3.059442 | 0.000000 |  |  | 4 B  | 3.059442 | 1.653600 | 2.192071 | 0.000000 |  | 5 B | 2.259319 | 1.748615 | 2.259319 | 1.748615 | 0.000000 | 6 B  | 2.298654 | 1.754680 | 2.298654 | 1.754680 | 2.583725 | 7 B | 2.159627 | 3.209789 | 2.159627 | 3.209789 | 3.371687 | 8 B  | 2.258963 | 3.705490 | 2.258963 | 3.705490 | 2.515437 | 9 B  | 2.262963 | 3.995736 | 2.262963 | 3.995736 | 3.391114 |  | 6 | 7 | 8 | 9 |  | 6 B  | 0.000000 |  |  |  |  | 7 B | 1.866603 | 0.000000 |  |  |  | 8 B  | 3.630860 | 2.928537 | 0.000000 |  |  | 9 B  | 3.258136 | 1.814608 | 1.593592 | 0.000000 |  |
|                                                                                                                                     | 1                                                                                                                                                                                                                                                                                                                                                                                                                                                                                                                                                                                                                                                                                                                                                                                                                                                                                                                                                                                                                                                                                                                                                                                                                                                                                                                                                                                                                                                                                                       | 2        | 3        | 4        | 5        |   |   |      |          |  |  |  |  |     |          |          |  |  |  |      |          |          |          |  |  |      |          |          |          |          |  |     |          |          |          |          |          |      |          |          |          |          |          |     |          |          |          |          |          |      |          |          |          |          |          |      |          |          |          |          |          |  |   |   |   |   |  |      |          |  |  |  |  |     |          |          |  |  |  |      |          |          |          |  |  |      |          |          |          |          |  |
| 1 Os                                                                                                                                | 0.000000                                                                                                                                                                                                                                                                                                                                                                                                                                                                                                                                                                                                                                                                                                                                                                                                                                                                                                                                                                                                                                                                                                                                                                                                                                                                                                                                                                                                                                                                                                |          |          |          |          |   |   |      |          |  |  |  |  |     |          |          |  |  |  |      |          |          |          |  |  |      |          |          |          |          |  |     |          |          |          |          |          |      |          |          |          |          |          |     |          |          |          |          |          |      |          |          |          |          |          |      |          |          |          |          |          |  |   |   |   |   |  |      |          |  |  |  |  |     |          |          |  |  |  |      |          |          |          |  |  |      |          |          |          |          |  |
| 2 B                                                                                                                                 | 2.192071                                                                                                                                                                                                                                                                                                                                                                                                                                                                                                                                                                                                                                                                                                                                                                                                                                                                                                                                                                                                                                                                                                                                                                                                                                                                                                                                                                                                                                                                                                | 0.000000 |          |          |          |   |   |      |          |  |  |  |  |     |          |          |  |  |  |      |          |          |          |  |  |      |          |          |          |          |  |     |          |          |          |          |          |      |          |          |          |          |          |     |          |          |          |          |          |      |          |          |          |          |          |      |          |          |          |          |          |  |   |   |   |   |  |      |          |  |  |  |  |     |          |          |  |  |  |      |          |          |          |  |  |      |          |          |          |          |  |
| 3 Os                                                                                                                                | 2.754600                                                                                                                                                                                                                                                                                                                                                                                                                                                                                                                                                                                                                                                                                                                                                                                                                                                                                                                                                                                                                                                                                                                                                                                                                                                                                                                                                                                                                                                                                                | 3.059442 | 0.000000 |          |          |   |   |      |          |  |  |  |  |     |          |          |  |  |  |      |          |          |          |  |  |      |          |          |          |          |  |     |          |          |          |          |          |      |          |          |          |          |          |     |          |          |          |          |          |      |          |          |          |          |          |      |          |          |          |          |          |  |   |   |   |   |  |      |          |  |  |  |  |     |          |          |  |  |  |      |          |          |          |  |  |      |          |          |          |          |  |
| 4 B                                                                                                                                 | 3.059442                                                                                                                                                                                                                                                                                                                                                                                                                                                                                                                                                                                                                                                                                                                                                                                                                                                                                                                                                                                                                                                                                                                                                                                                                                                                                                                                                                                                                                                                                                | 1.653600 | 2.192071 | 0.000000 |          |   |   |      |          |  |  |  |  |     |          |          |  |  |  |      |          |          |          |  |  |      |          |          |          |          |  |     |          |          |          |          |          |      |          |          |          |          |          |     |          |          |          |          |          |      |          |          |          |          |          |      |          |          |          |          |          |  |   |   |   |   |  |      |          |  |  |  |  |     |          |          |  |  |  |      |          |          |          |  |  |      |          |          |          |          |  |
| 5 B                                                                                                                                 | 2.259319                                                                                                                                                                                                                                                                                                                                                                                                                                                                                                                                                                                                                                                                                                                                                                                                                                                                                                                                                                                                                                                                                                                                                                                                                                                                                                                                                                                                                                                                                                | 1.748615 | 2.259319 | 1.748615 | 0.000000 |   |   |      |          |  |  |  |  |     |          |          |  |  |  |      |          |          |          |  |  |      |          |          |          |          |  |     |          |          |          |          |          |      |          |          |          |          |          |     |          |          |          |          |          |      |          |          |          |          |          |      |          |          |          |          |          |  |   |   |   |   |  |      |          |  |  |  |  |     |          |          |  |  |  |      |          |          |          |  |  |      |          |          |          |          |  |
| 6 B                                                                                                                                 | 2.298654                                                                                                                                                                                                                                                                                                                                                                                                                                                                                                                                                                                                                                                                                                                                                                                                                                                                                                                                                                                                                                                                                                                                                                                                                                                                                                                                                                                                                                                                                                | 1.754680 | 2.298654 | 1.754680 | 2.583725 |   |   |      |          |  |  |  |  |     |          |          |  |  |  |      |          |          |          |  |  |      |          |          |          |          |  |     |          |          |          |          |          |      |          |          |          |          |          |     |          |          |          |          |          |      |          |          |          |          |          |      |          |          |          |          |          |  |   |   |   |   |  |      |          |  |  |  |  |     |          |          |  |  |  |      |          |          |          |  |  |      |          |          |          |          |  |
| 7 B                                                                                                                                 | 2.159627                                                                                                                                                                                                                                                                                                                                                                                                                                                                                                                                                                                                                                                                                                                                                                                                                                                                                                                                                                                                                                                                                                                                                                                                                                                                                                                                                                                                                                                                                                | 3.209789 | 2.159627 | 3.209789 | 3.371687 |   |   |      |          |  |  |  |  |     |          |          |  |  |  |      |          |          |          |  |  |      |          |          |          |          |  |     |          |          |          |          |          |      |          |          |          |          |          |     |          |          |          |          |          |      |          |          |          |          |          |      |          |          |          |          |          |  |   |   |   |   |  |      |          |  |  |  |  |     |          |          |  |  |  |      |          |          |          |  |  |      |          |          |          |          |  |
| 8 B                                                                                                                                 | 2.258963                                                                                                                                                                                                                                                                                                                                                                                                                                                                                                                                                                                                                                                                                                                                                                                                                                                                                                                                                                                                                                                                                                                                                                                                                                                                                                                                                                                                                                                                                                | 3.705490 | 2.258963 | 3.705490 | 2.515437 |   |   |      |          |  |  |  |  |     |          |          |  |  |  |      |          |          |          |  |  |      |          |          |          |          |  |     |          |          |          |          |          |      |          |          |          |          |          |     |          |          |          |          |          |      |          |          |          |          |          |      |          |          |          |          |          |  |   |   |   |   |  |      |          |  |  |  |  |     |          |          |  |  |  |      |          |          |          |  |  |      |          |          |          |          |  |
| 9 B                                                                                                                                 | 2.262963                                                                                                                                                                                                                                                                                                                                                                                                                                                                                                                                                                                                                                                                                                                                                                                                                                                                                                                                                                                                                                                                                                                                                                                                                                                                                                                                                                                                                                                                                                | 3.995736 | 2.262963 | 3.995736 | 3.391114 |   |   |      |          |  |  |  |  |     |          |          |  |  |  |      |          |          |          |  |  |      |          |          |          |          |  |     |          |          |          |          |          |      |          |          |          |          |          |     |          |          |          |          |          |      |          |          |          |          |          |      |          |          |          |          |          |  |   |   |   |   |  |      |          |  |  |  |  |     |          |          |  |  |  |      |          |          |          |  |  |      |          |          |          |          |  |
|                                                                                                                                     | 6                                                                                                                                                                                                                                                                                                                                                                                                                                                                                                                                                                                                                                                                                                                                                                                                                                                                                                                                                                                                                                                                                                                                                                                                                                                                                                                                                                                                                                                                                                       | 7        | 8        | 9        |          |   |   |      |          |  |  |  |  |     |          |          |  |  |  |      |          |          |          |  |  |      |          |          |          |          |  |     |          |          |          |          |          |      |          |          |          |          |          |     |          |          |          |          |          |      |          |          |          |          |          |      |          |          |          |          |          |  |   |   |   |   |  |      |          |  |  |  |  |     |          |          |  |  |  |      |          |          |          |  |  |      |          |          |          |          |  |
| 6 B                                                                                                                                 | 0.000000                                                                                                                                                                                                                                                                                                                                                                                                                                                                                                                                                                                                                                                                                                                                                                                                                                                                                                                                                                                                                                                                                                                                                                                                                                                                                                                                                                                                                                                                                                |          |          |          |          |   |   |      |          |  |  |  |  |     |          |          |  |  |  |      |          |          |          |  |  |      |          |          |          |          |  |     |          |          |          |          |          |      |          |          |          |          |          |     |          |          |          |          |          |      |          |          |          |          |          |      |          |          |          |          |          |  |   |   |   |   |  |      |          |  |  |  |  |     |          |          |  |  |  |      |          |          |          |  |  |      |          |          |          |          |  |
| 7 B                                                                                                                                 | 1.866603                                                                                                                                                                                                                                                                                                                                                                                                                                                                                                                                                                                                                                                                                                                                                                                                                                                                                                                                                                                                                                                                                                                                                                                                                                                                                                                                                                                                                                                                                                | 0.000000 |          |          |          |   |   |      |          |  |  |  |  |     |          |          |  |  |  |      |          |          |          |  |  |      |          |          |          |          |  |     |          |          |          |          |          |      |          |          |          |          |          |     |          |          |          |          |          |      |          |          |          |          |          |      |          |          |          |          |          |  |   |   |   |   |  |      |          |  |  |  |  |     |          |          |  |  |  |      |          |          |          |  |  |      |          |          |          |          |  |
| 8 B                                                                                                                                 | 3.630860                                                                                                                                                                                                                                                                                                                                                                                                                                                                                                                                                                                                                                                                                                                                                                                                                                                                                                                                                                                                                                                                                                                                                                                                                                                                                                                                                                                                                                                                                                | 2.928537 | 0.000000 |          |          |   |   |      |          |  |  |  |  |     |          |          |  |  |  |      |          |          |          |  |  |      |          |          |          |          |  |     |          |          |          |          |          |      |          |          |          |          |          |     |          |          |          |          |          |      |          |          |          |          |          |      |          |          |          |          |          |  |   |   |   |   |  |      |          |  |  |  |  |     |          |          |  |  |  |      |          |          |          |  |  |      |          |          |          |          |  |
| 9 B                                                                                                                                 | 3.258136                                                                                                                                                                                                                                                                                                                                                                                                                                                                                                                                                                                                                                                                                                                                                                                                                                                                                                                                                                                                                                                                                                                                                                                                                                                                                                                                                                                                                                                                                                | 1.814608 | 1.593592 | 0.000000 |          |   |   |      |          |  |  |  |  |     |          |          |  |  |  |      |          |          |          |  |  |      |          |          |          |          |  |     |          |          |          |          |          |      |          |          |          |          |          |     |          |          |          |          |          |      |          |          |          |          |          |      |          |          |          |          |          |  |   |   |   |   |  |      |          |  |  |  |  |     |          |          |  |  |  |      |          |          |          |  |  |      |          |          |          |          |  |
|  <p>9. -746.80100499 +29.5</p>                   | <table border="1"> <thead> <tr> <th></th> <th>1</th> <th>2</th> <th>3</th> <th>4</th> <th>5</th> </tr> </thead> <tbody> <tr><td>1 B</td><td>0.000000</td><td></td><td></td><td></td><td></td></tr> <tr><td>2 B</td><td>2.983495</td><td>0.000000</td><td></td><td></td><td></td></tr> <tr><td>3 B</td><td>2.747353</td><td>1.819953</td><td>0.000000</td><td></td><td></td></tr> <tr><td>4 B</td><td>1.819886</td><td>3.100981</td><td>1.870457</td><td>0.000000</td><td></td></tr> <tr><td>5 B</td><td>1.796561</td><td>1.841679</td><td>2.440529</td><td>2.834151</td><td>0.000000</td></tr> <tr><td>6 Os</td><td>2.181893</td><td>3.320745</td><td>2.350388</td><td>2.171281</td><td>2.306243</td></tr> <tr><td>7 B</td><td>3.654712</td><td>2.981479</td><td>1.662675</td><td>2.849030</td><td>3.150920</td></tr> <tr><td>8 B</td><td>3.049550</td><td>1.766292</td><td>1.820319</td><td>3.143838</td><td>1.740083</td></tr> <tr><td>9 Os</td><td>2.097253</td><td>2.040192</td><td>2.237445</td><td>2.101608</td><td>2.413104</td></tr> <tr> <td></td> <td>6</td> <td>7</td> <td>8</td> <td>9</td> <td></td> </tr> <tr><td>6 Os</td><td>0.000000</td><td></td><td></td><td></td><td></td></tr> <tr><td>7 B</td><td>2.084814</td><td>0.000000</td><td></td><td></td><td></td></tr> <tr><td>8 B</td><td>2.213566</td><td>1.813234</td><td>0.000000</td><td></td><td></td></tr> <tr><td>9 Os</td><td>3.473251</td><td>3.826145</td><td>3.206841</td><td>0.000000</td><td></td></tr> </tbody> </table> |          | 1        | 2        | 3        | 4 | 5 | 1 B  | 0.000000 |  |  |  |  | 2 B | 2.983495 | 0.000000 |  |  |  | 3 B  | 2.747353 | 1.819953 | 0.000000 |  |  | 4 B  | 1.819886 | 3.100981 | 1.870457 | 0.000000 |  | 5 B | 1.796561 | 1.841679 | 2.440529 | 2.834151 | 0.000000 | 6 Os | 2.181893 | 3.320745 | 2.350388 | 2.171281 | 2.306243 | 7 B | 3.654712 | 2.981479 | 1.662675 | 2.849030 | 3.150920 | 8 B  | 3.049550 | 1.766292 | 1.820319 | 3.143838 | 1.740083 | 9 Os | 2.097253 | 2.040192 | 2.237445 | 2.101608 | 2.413104 |  | 6 | 7 | 8 | 9 |  | 6 Os | 0.000000 |  |  |  |  | 7 B | 2.084814 | 0.000000 |  |  |  | 8 B  | 2.213566 | 1.813234 | 0.000000 |  |  | 9 Os | 3.473251 | 3.826145 | 3.206841 | 0.000000 |  |
|                                                                                                                                     | 1                                                                                                                                                                                                                                                                                                                                                                                                                                                                                                                                                                                                                                                                                                                                                                                                                                                                                                                                                                                                                                                                                                                                                                                                                                                                                                                                                                                                                                                                                                       | 2        | 3        | 4        | 5        |   |   |      |          |  |  |  |  |     |          |          |  |  |  |      |          |          |          |  |  |      |          |          |          |          |  |     |          |          |          |          |          |      |          |          |          |          |          |     |          |          |          |          |          |      |          |          |          |          |          |      |          |          |          |          |          |  |   |   |   |   |  |      |          |  |  |  |  |     |          |          |  |  |  |      |          |          |          |  |  |      |          |          |          |          |  |
| 1 B                                                                                                                                 | 0.000000                                                                                                                                                                                                                                                                                                                                                                                                                                                                                                                                                                                                                                                                                                                                                                                                                                                                                                                                                                                                                                                                                                                                                                                                                                                                                                                                                                                                                                                                                                |          |          |          |          |   |   |      |          |  |  |  |  |     |          |          |  |  |  |      |          |          |          |  |  |      |          |          |          |          |  |     |          |          |          |          |          |      |          |          |          |          |          |     |          |          |          |          |          |      |          |          |          |          |          |      |          |          |          |          |          |  |   |   |   |   |  |      |          |  |  |  |  |     |          |          |  |  |  |      |          |          |          |  |  |      |          |          |          |          |  |
| 2 B                                                                                                                                 | 2.983495                                                                                                                                                                                                                                                                                                                                                                                                                                                                                                                                                                                                                                                                                                                                                                                                                                                                                                                                                                                                                                                                                                                                                                                                                                                                                                                                                                                                                                                                                                | 0.000000 |          |          |          |   |   |      |          |  |  |  |  |     |          |          |  |  |  |      |          |          |          |  |  |      |          |          |          |          |  |     |          |          |          |          |          |      |          |          |          |          |          |     |          |          |          |          |          |      |          |          |          |          |          |      |          |          |          |          |          |  |   |   |   |   |  |      |          |  |  |  |  |     |          |          |  |  |  |      |          |          |          |  |  |      |          |          |          |          |  |
| 3 B                                                                                                                                 | 2.747353                                                                                                                                                                                                                                                                                                                                                                                                                                                                                                                                                                                                                                                                                                                                                                                                                                                                                                                                                                                                                                                                                                                                                                                                                                                                                                                                                                                                                                                                                                | 1.819953 | 0.000000 |          |          |   |   |      |          |  |  |  |  |     |          |          |  |  |  |      |          |          |          |  |  |      |          |          |          |          |  |     |          |          |          |          |          |      |          |          |          |          |          |     |          |          |          |          |          |      |          |          |          |          |          |      |          |          |          |          |          |  |   |   |   |   |  |      |          |  |  |  |  |     |          |          |  |  |  |      |          |          |          |  |  |      |          |          |          |          |  |
| 4 B                                                                                                                                 | 1.819886                                                                                                                                                                                                                                                                                                                                                                                                                                                                                                                                                                                                                                                                                                                                                                                                                                                                                                                                                                                                                                                                                                                                                                                                                                                                                                                                                                                                                                                                                                | 3.100981 | 1.870457 | 0.000000 |          |   |   |      |          |  |  |  |  |     |          |          |  |  |  |      |          |          |          |  |  |      |          |          |          |          |  |     |          |          |          |          |          |      |          |          |          |          |          |     |          |          |          |          |          |      |          |          |          |          |          |      |          |          |          |          |          |  |   |   |   |   |  |      |          |  |  |  |  |     |          |          |  |  |  |      |          |          |          |  |  |      |          |          |          |          |  |
| 5 B                                                                                                                                 | 1.796561                                                                                                                                                                                                                                                                                                                                                                                                                                                                                                                                                                                                                                                                                                                                                                                                                                                                                                                                                                                                                                                                                                                                                                                                                                                                                                                                                                                                                                                                                                | 1.841679 | 2.440529 | 2.834151 | 0.000000 |   |   |      |          |  |  |  |  |     |          |          |  |  |  |      |          |          |          |  |  |      |          |          |          |          |  |     |          |          |          |          |          |      |          |          |          |          |          |     |          |          |          |          |          |      |          |          |          |          |          |      |          |          |          |          |          |  |   |   |   |   |  |      |          |  |  |  |  |     |          |          |  |  |  |      |          |          |          |  |  |      |          |          |          |          |  |
| 6 Os                                                                                                                                | 2.181893                                                                                                                                                                                                                                                                                                                                                                                                                                                                                                                                                                                                                                                                                                                                                                                                                                                                                                                                                                                                                                                                                                                                                                                                                                                                                                                                                                                                                                                                                                | 3.320745 | 2.350388 | 2.171281 | 2.306243 |   |   |      |          |  |  |  |  |     |          |          |  |  |  |      |          |          |          |  |  |      |          |          |          |          |  |     |          |          |          |          |          |      |          |          |          |          |          |     |          |          |          |          |          |      |          |          |          |          |          |      |          |          |          |          |          |  |   |   |   |   |  |      |          |  |  |  |  |     |          |          |  |  |  |      |          |          |          |  |  |      |          |          |          |          |  |
| 7 B                                                                                                                                 | 3.654712                                                                                                                                                                                                                                                                                                                                                                                                                                                                                                                                                                                                                                                                                                                                                                                                                                                                                                                                                                                                                                                                                                                                                                                                                                                                                                                                                                                                                                                                                                | 2.981479 | 1.662675 | 2.849030 | 3.150920 |   |   |      |          |  |  |  |  |     |          |          |  |  |  |      |          |          |          |  |  |      |          |          |          |          |  |     |          |          |          |          |          |      |          |          |          |          |          |     |          |          |          |          |          |      |          |          |          |          |          |      |          |          |          |          |          |  |   |   |   |   |  |      |          |  |  |  |  |     |          |          |  |  |  |      |          |          |          |  |  |      |          |          |          |          |  |
| 8 B                                                                                                                                 | 3.049550                                                                                                                                                                                                                                                                                                                                                                                                                                                                                                                                                                                                                                                                                                                                                                                                                                                                                                                                                                                                                                                                                                                                                                                                                                                                                                                                                                                                                                                                                                | 1.766292 | 1.820319 | 3.143838 | 1.740083 |   |   |      |          |  |  |  |  |     |          |          |  |  |  |      |          |          |          |  |  |      |          |          |          |          |  |     |          |          |          |          |          |      |          |          |          |          |          |     |          |          |          |          |          |      |          |          |          |          |          |      |          |          |          |          |          |  |   |   |   |   |  |      |          |  |  |  |  |     |          |          |  |  |  |      |          |          |          |  |  |      |          |          |          |          |  |
| 9 Os                                                                                                                                | 2.097253                                                                                                                                                                                                                                                                                                                                                                                                                                                                                                                                                                                                                                                                                                                                                                                                                                                                                                                                                                                                                                                                                                                                                                                                                                                                                                                                                                                                                                                                                                | 2.040192 | 2.237445 | 2.101608 | 2.413104 |   |   |      |          |  |  |  |  |     |          |          |  |  |  |      |          |          |          |  |  |      |          |          |          |          |  |     |          |          |          |          |          |      |          |          |          |          |          |     |          |          |          |          |          |      |          |          |          |          |          |      |          |          |          |          |          |  |   |   |   |   |  |      |          |  |  |  |  |     |          |          |  |  |  |      |          |          |          |  |  |      |          |          |          |          |  |
|                                                                                                                                     | 6                                                                                                                                                                                                                                                                                                                                                                                                                                                                                                                                                                                                                                                                                                                                                                                                                                                                                                                                                                                                                                                                                                                                                                                                                                                                                                                                                                                                                                                                                                       | 7        | 8        | 9        |          |   |   |      |          |  |  |  |  |     |          |          |  |  |  |      |          |          |          |  |  |      |          |          |          |          |  |     |          |          |          |          |          |      |          |          |          |          |          |     |          |          |          |          |          |      |          |          |          |          |          |      |          |          |          |          |          |  |   |   |   |   |  |      |          |  |  |  |  |     |          |          |  |  |  |      |          |          |          |  |  |      |          |          |          |          |  |
| 6 Os                                                                                                                                | 0.000000                                                                                                                                                                                                                                                                                                                                                                                                                                                                                                                                                                                                                                                                                                                                                                                                                                                                                                                                                                                                                                                                                                                                                                                                                                                                                                                                                                                                                                                                                                |          |          |          |          |   |   |      |          |  |  |  |  |     |          |          |  |  |  |      |          |          |          |  |  |      |          |          |          |          |  |     |          |          |          |          |          |      |          |          |          |          |          |     |          |          |          |          |          |      |          |          |          |          |          |      |          |          |          |          |          |  |   |   |   |   |  |      |          |  |  |  |  |     |          |          |  |  |  |      |          |          |          |  |  |      |          |          |          |          |  |
| 7 B                                                                                                                                 | 2.084814                                                                                                                                                                                                                                                                                                                                                                                                                                                                                                                                                                                                                                                                                                                                                                                                                                                                                                                                                                                                                                                                                                                                                                                                                                                                                                                                                                                                                                                                                                | 0.000000 |          |          |          |   |   |      |          |  |  |  |  |     |          |          |  |  |  |      |          |          |          |  |  |      |          |          |          |          |  |     |          |          |          |          |          |      |          |          |          |          |          |     |          |          |          |          |          |      |          |          |          |          |          |      |          |          |          |          |          |  |   |   |   |   |  |      |          |  |  |  |  |     |          |          |  |  |  |      |          |          |          |  |  |      |          |          |          |          |  |
| 8 B                                                                                                                                 | 2.213566                                                                                                                                                                                                                                                                                                                                                                                                                                                                                                                                                                                                                                                                                                                                                                                                                                                                                                                                                                                                                                                                                                                                                                                                                                                                                                                                                                                                                                                                                                | 1.813234 | 0.000000 |          |          |   |   |      |          |  |  |  |  |     |          |          |  |  |  |      |          |          |          |  |  |      |          |          |          |          |  |     |          |          |          |          |          |      |          |          |          |          |          |     |          |          |          |          |          |      |          |          |          |          |          |      |          |          |          |          |          |  |   |   |   |   |  |      |          |  |  |  |  |     |          |          |  |  |  |      |          |          |          |  |  |      |          |          |          |          |  |
| 9 Os                                                                                                                                | 3.473251                                                                                                                                                                                                                                                                                                                                                                                                                                                                                                                                                                                                                                                                                                                                                                                                                                                                                                                                                                                                                                                                                                                                                                                                                                                                                                                                                                                                                                                                                                | 3.826145 | 3.206841 | 0.000000 |          |   |   |      |          |  |  |  |  |     |          |          |  |  |  |      |          |          |          |  |  |      |          |          |          |          |  |     |          |          |          |          |          |      |          |          |          |          |          |     |          |          |          |          |          |      |          |          |          |          |          |      |          |          |          |          |          |  |   |   |   |   |  |      |          |  |  |  |  |     |          |          |  |  |  |      |          |          |          |  |  |      |          |          |          |          |  |

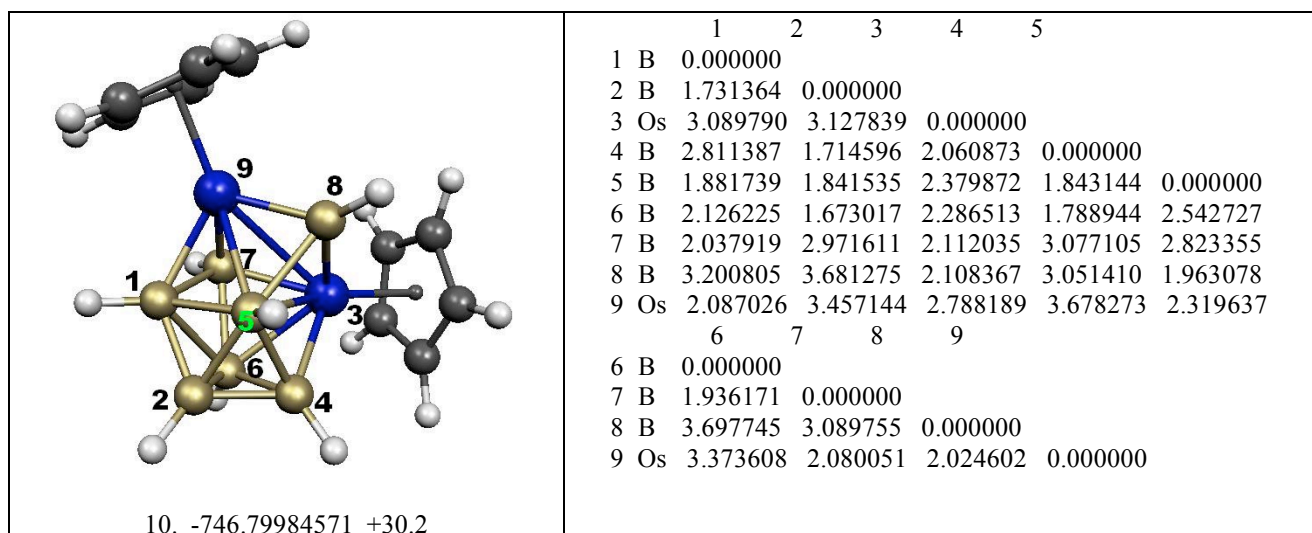

Table S7C. Energy ranking of the Cp<sub>2</sub>Os<sub>2</sub>B<sub>7</sub>H<sub>7</sub> structures

| No | Initial structure                | Final energy (a.u.) | D kcal/mole |
|----|----------------------------------|---------------------|-------------|
| 1  | 09-Os-1-CapCube_f                | -746.84793009       | 0.00        |
| 2  | 09-Os-3-Tl99-b                   | -746.84793009       | 0.00        |
| 3  | 09-Os-3-Tl99-c                   | -746.82879378       | 12.01       |
| 4  | 09-Os-1-CapCube_d                | -746.82879377       | 12.01       |
| 5  | 09-Os-4-TrTrPr_c_r-34            | -746.82879377       | 12.01       |
| 6  | 09-Os-4-TrTrPr_c_i-34            | -746.82802994       | 12.49       |
| 7  | 09-Os-2-PressCapCube_m           | -746.81376772       | 21.44       |
| 8  | 09-Os-3-Tl99-g                   | -746.81376772       | 21.44       |
| 9  | 09-Os-3-Tl99-m                   | -746.81376772       | 21.44       |
| 10 | 09-Os-4-TrTrPr_e_r-213           | -746.81376771       | 21.44       |
| 11 | 09-Os-5-structure-5              | -746.80721256       | 25.55       |
| 12 | 09-Os-5-structure-4              | -746.80721256       | 25.55       |
| 13 | 09-Os-3-Tl99-j_r-136             | -746.80552785       | 26.61       |
| 14 | 09-Os-5-Bipyr-hept3              | -746.80536618       | 26.71       |
| 15 | 09-Os-1-CapCube_g                | -746.80279011       | 28.33       |
| 16 | 09-Os-2-PressCapCube_o           | -746.80279011       | 28.33       |
| 17 | 09-Os-2-PressCapCube_e_r-348     | -746.80240548       | 28.57       |
| 18 | 09-Os-5-structure-1              | -746.80240548       | 28.57       |
| 19 | 09-Os-2-PressCapCube_f           | -746.80197481       | 28.84       |
| 20 | 09-Os-1-CapCube_b                | -746.80100499       | 29.45       |
| 21 | 09-Os-2-PressCapCube_a_r-44      | -746.79984571       | 30.17       |
| 22 | 09-Os-2-PressCapCube_a_r-277     | -746.79984570       | 30.17       |
| 23 | 09-Os-1-CapCube_i                | -746.79976676       | 30.22       |
| 24 | 09-Os-1-CapCube_c                | -746.79972140       | 30.25       |
| 25 | 09-Os-2-PressCapCube_j_r-551-142 | -746.79972140       | 30.25       |
| 26 | 09-Os-3-Tl99-e                   | -746.79972139       | 30.25       |
| 27 | 09-Os-4-TrTrPr_a                 | -746.79972139       | 30.25       |
| 28 | 09-Os-4-TrTrPr_d_r-209           | -746.79972139       | 30.25       |
| 29 | 09-Os-4-TrTrPr_d_r-45            | -746.79972139       | 30.25       |
| 30 | 09-Os-2-PressCapCube_e_i-348     | -746.79632437       | 32.38       |
| 31 | 09-Os-3-Tl99-l_r-724             | -746.79270898       | 34.65       |
| 32 | 09-Os-2-PressCapCube_j_r-551-368 | -746.79102841       | 35.71       |
| 33 | 09-Os-2-PressCapCube_j_r-551-55  | -746.79102841       | 35.71       |
| 34 | 09-Os-2-PressCapCube_b           | -746.78932408       | 36.78       |
| 35 | 09-Os-2-PressCapCube_h           | -746.78856124       | 37.25       |
| 36 | 09-Os-3-Tl99-i                   | -746.78314180       | 40.65       |
| 37 | 09-Os-4-TrTrPr_e_i-213           | -746.78195391       | 41.40       |
| 38 | 09-Os-2-PressCapCube_i           | -746.78149856       | 41.69       |
| 39 | 09-Os-2-PressCapCube_j_r-92-450  | -746.77973293       | 42.79       |
| 40 | 09-Os-2-PressCapCube_j_r-68      | -746.77973292       | 42.79       |
| 41 | 09-Os-4-TrTrPr_f_r-115           | -746.77950082       | 42.94       |



|    |                                   |               |       |
|----|-----------------------------------|---------------|-------|
| 42 | 09-Os-1-CapCube_h                 | -746.77769598 | 44.07 |
| 43 | 09-Os-1-CapCube_e                 | -746.77675950 | 44.66 |
| 44 | 09-Os-3-Tl99-d_r-343-75           | -746.77675950 | 44.66 |
| 45 | 09-Os-3-Tl99-d_r-19-316-48        | -746.77675950 | 44.66 |
| 46 | 09-Os-2-PressCapCube_g            | -746.77675949 | 44.66 |
| 47 | 09-Os-3-Tl99-d_r-343-34           | -746.77675949 | 44.66 |
| 48 | 09-Os-3-Tl99-d_r-46-320           | -746.77675949 | 44.66 |
| 49 | 09-Os-3-Tl99-d_r-33-320           | -746.77675949 | 44.66 |
| 50 | 09-Os-3-Tl99-d_r-19-316-81        | -746.77675949 | 44.66 |
| 51 | 09-Os-3-Tl99-d_r-19-40            | -746.77675949 | 44.66 |
| 52 | 09-Os-4-TrTrPr_f i-115            | -746.77651588 | 44.81 |
| 53 | 09-Os-3-Tl99-a                    | -746.77291234 | 47.07 |
| 54 | 09-Os-4-TrTrPr_d imag             | -746.77176847 | 47.79 |
| 55 | 09-Os-2-PressCapCube_j_r-551 imag | -746.76393245 | 52.71 |
| 56 | 09-Os-2-PressCapCube_n            | -746.76373662 | 52.83 |
| 57 | 09-Os-2-PressCapCube_j_r-636-314  | -746.76224369 | 53.77 |
| 58 | 09-Os-2-PressCapCube_j_r-188-314  | -746.76224369 | 53.77 |
| 59 | 09-Os-2-PressCapCube_j_r-72-314   | -746.76224369 | 53.77 |
| 60 | 09-Os-4-TrTrPr_b                  | -746.76224369 | 53.77 |
| 61 | 09-Os-3-Tl99-k_r-48               | -746.76224368 | 53.77 |
| 62 | 09-Os-2-PressCapCube_c            | -746.76224312 | 53.77 |
| 63 | 09-Os-3-Tl99-j i-136              | -746.76072521 | 54.72 |
| 64 | 09-Os-2-PressCapCube_j_r-507-52   | -746.75949824 | 55.49 |
| 65 | 09-Os-2-PressCapCube_j_r-57-52    | -746.75949824 | 55.49 |
| 66 | 09-Os-3-Tl99-f                    | -746.75949824 | 55.49 |
| 67 | 09-Os-2-PressCapCube_j_r-507-81   | -746.75949823 | 55.49 |
| 68 | 09-Os-2-PressCapCube_j_r-57-81    | -746.75949823 | 55.49 |
| 69 | 09-Os-3-Tl99-h                    | -746.75465885 | 58.53 |
| 70 | 09-Os-1-CapCube_a                 | -746.75465219 | 58.53 |
| 71 | 09-Os-2-PressCapCube_k            | -746.75047608 | 61.15 |
| 72 | 09-Os-2-PressCapCube_j_r-507-521  | -746.74664718 | 63.56 |
| 73 | 09-Os-2-PressCapCube_j_r-57-521   | -746.74664718 | 63.56 |
| 74 | 09-Os-2-PressCapCube_l            | -746.74183023 | 66.58 |
| 75 | 09-Os-3-Tl99-d_r-19-316 imag      | -746.74010769 | 67.66 |
| 76 | 09-Os-3-Tl99-d_r-343 imag         | -746.73936656 | 68.12 |
| 77 | 09-Os-3-Tl99-d_r-46 i-320         | -746.73453444 | 71.16 |
| 78 | 09-Os-3-Tl99-d_r-33 i-320         | -746.73453443 | 71.16 |
| 79 | 09-Os-3-Tl99-d_r-19 imag          | -746.73441766 | 71.23 |
| 80 | 09-Os-2-PressCapCube_a imag       | -746.73237503 | 72.51 |
| 81 | 09-Os-3-Tl99-d imag               | -746.73196086 | 72.77 |
| 82 | 09-Os-2-PressCapCube_j_r-92 i-450 | -746.73001104 | 73.99 |
| 83 | 09-Os-5-Bipyr-hept1_r-27          | -746.72592812 | 76.56 |
| 84 | 09-Os-5-Bipyr-hept1 i-27          | -746.72436914 | 77.53 |
| 85 | 09-Os-3-Tl99-l_r-67               | -746.72258334 | 78.66 |
| 86 | 09-Os-2-PressCapCube_d            | -746.72258333 | 78.66 |

|    |                                    |               |        |
|----|------------------------------------|---------------|--------|
| 87 | 09-Os-2-PressCapCube_j_r-507-404   | -746.72049360 | 79.97  |
| 88 | 09-Os-2-PressCapCube_j_r-57-404    | -746.72049358 | 79.97  |
| 89 | 09-Os-3-Tl99-k_r-445               | -746.71989520 | 80.34  |
| 90 | 09-Os-5-Bipyr-hept2                | -746.69149704 | 98.16  |
| 91 | 09-Os-2-PressCapCube_j_r-72 i-314  | -746.67488424 | 108.59 |
| 92 | 09-Os-2-PressCapCube_j_r-636 i-314 | -746.67488423 | 108.59 |
| 93 | 09-Os-2-PressCapCube_j_r-188 i-314 | -746.67488422 | 108.59 |
| 94 | 09-Os-3-Tl99-l imag                | -746.67296576 | 109.79 |
| 95 | 09-Os-3-Tl99-k imag                | -746.66111169 | 117.23 |
| 96 | 09-Os-2-PressCapCube_j_r-507 imag  | -746.59722570 | 157.32 |
| 97 | 09-Os-2-PressCapCube_j_r-57 imag   | -746.59722569 | 157.32 |
| 98 | 09-Os-2-PressCapCube_j imag        | -746.58409054 | 165.56 |

## The 10-vertex $\text{Cp}_2\text{Os}_2\text{B}_8\text{H}_8$ System

Table S8A. Initial structures

Table S8B. Best structures distances

Table S8C. Global ranking of all structures

Table S8A. Initial  $\text{Cp}_2\text{Os}_2\text{B}_8\text{H}_8$  structures (one example from each family); 62 structures in total

|                                                                                                                                               |                                                                                                                                                 |
|-----------------------------------------------------------------------------------------------------------------------------------------------|-------------------------------------------------------------------------------------------------------------------------------------------------|
| <p><b>Initial structures</b></p>                                                                                                              | 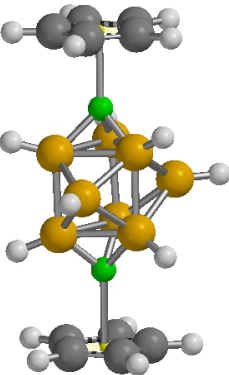 <p>1. Tetrapped trigonal prism (<math>C_{2v}</math>) 16</p> |
|  <p>2. Tetrapped trigonal prism (<math>C_{3v}</math>) 9</p> |  <p>3. Bicapped cube 8</p>                                  |
|  <p>4. Bicapped square antiprism 7</p>                     |  <p>5. Pentagonal prism 5</p>                               |
|  <p>6. Pentagonal antiprism 5</p>                          |  <p>7. Isocloso structure 12</p>                            |

Table S8B. Distance table for the lowest energy Cp<sub>2</sub>Os<sub>2</sub>B<sub>8</sub>H<sub>8</sub> structures

| 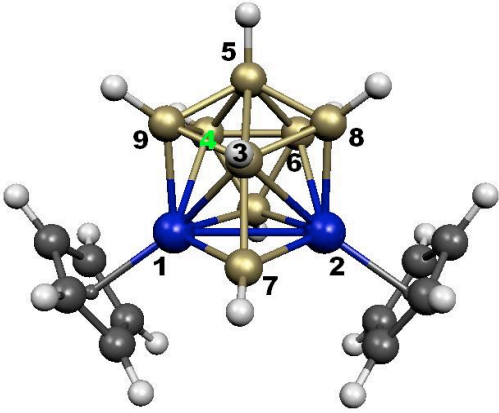 <p>1. -772.32049989 +0.0 C<sub>s</sub></p>  | <table border="1"> <thead> <tr> <th></th> <th>1</th> <th>2</th> <th>3</th> <th>4</th> <th>5</th> </tr> </thead> <tbody> <tr><td>1 Os</td><td>0.000000</td><td></td><td></td><td></td><td></td></tr> <tr><td>2 Os</td><td>2.813000</td><td>0.000000</td><td></td><td></td><td></td></tr> <tr><td>3 B</td><td>2.326819</td><td>2.326819</td><td>0.000000</td><td></td><td></td></tr> <tr><td>4 B</td><td>2.324591</td><td>3.228853</td><td>2.724559</td><td>0.000000</td><td></td></tr> <tr><td>5 B</td><td>3.182018</td><td>3.182018</td><td>1.988548</td><td>1.787587</td><td>0.000000</td></tr> <tr><td>6 B</td><td>3.228853</td><td>2.324591</td><td>2.724559</td><td>1.785200</td><td>1.787587</td></tr> <tr><td>7 B</td><td>2.067467</td><td>2.067467</td><td>1.894208</td><td>3.715093</td><td>3.688356</td></tr> <tr><td>8 B</td><td>3.549145</td><td>2.070059</td><td>1.838285</td><td>2.894865</td><td>1.749516</td></tr> <tr><td>9 B</td><td>2.070059</td><td>3.549145</td><td>1.838285</td><td>1.762298</td><td>1.749516</td></tr> <tr><td>10 B</td><td>2.150369</td><td>2.150369</td><td>3.016690</td><td>1.796622</td><td>2.928043</td></tr> <tr> <td></td> <td>6</td> <td>7</td> <td>8</td> <td>9</td> <td>10</td> </tr> <tr><td>6 B</td><td>0.000000</td><td></td><td></td><td></td><td></td></tr> <tr><td>7 B</td><td>3.715093</td><td>0.000000</td><td></td><td></td><td></td></tr> <tr><td>8 B</td><td>1.762298</td><td>3.126935</td><td>0.000000</td><td></td><td></td></tr> <tr><td>9 B</td><td>2.894865</td><td>3.126935</td><td>2.954600</td><td>0.000000</td><td></td></tr> <tr><td>10 B</td><td>1.796622</td><td>3.135015</td><td>2.983771</td><td>2.983771</td><td>0.000000</td></tr> </tbody> </table>   |          | 1        | 2        | 3        | 4 | 5 | 1 Os | 0.000000 |  |  |  |  | 2 Os | 2.813000 | 0.000000 |  |  |  | 3 B | 2.326819 | 2.326819 | 0.000000 |  |  | 4 B | 2.324591 | 3.228853 | 2.724559 | 0.000000 |  | 5 B  | 3.182018 | 3.182018 | 1.988548 | 1.787587 | 0.000000 | 6 B  | 3.228853 | 2.324591 | 2.724559 | 1.785200 | 1.787587 | 7 B | 2.067467 | 2.067467 | 1.894208 | 3.715093 | 3.688356 | 8 B  | 3.549145 | 2.070059 | 1.838285 | 2.894865 | 1.749516 | 9 B | 2.070059 | 3.549145 | 1.838285 | 1.762298 | 1.749516 | 10 B  | 2.150369 | 2.150369 | 3.016690 | 1.796622 | 2.928043 |  | 6 | 7 | 8 | 9 | 10 | 6 B  | 0.000000 |  |  |  |  | 7 B | 3.715093 | 0.000000 |  |  |  | 8 B  | 1.762298 | 3.126935 | 0.000000 |  |  | 9 B | 2.894865 | 3.126935 | 2.954600 | 0.000000 |  | 10 B  | 1.796622 | 3.135015 | 2.983771 | 2.983771 | 0.000000 |
|-------------------------------------------------------------------------------------------------------------------------------|-----------------------------------------------------------------------------------------------------------------------------------------------------------------------------------------------------------------------------------------------------------------------------------------------------------------------------------------------------------------------------------------------------------------------------------------------------------------------------------------------------------------------------------------------------------------------------------------------------------------------------------------------------------------------------------------------------------------------------------------------------------------------------------------------------------------------------------------------------------------------------------------------------------------------------------------------------------------------------------------------------------------------------------------------------------------------------------------------------------------------------------------------------------------------------------------------------------------------------------------------------------------------------------------------------------------------------------------------------------------------------------------------------------------------------------------------------------------------------------------------------------------------------------------------------------------------------------------------------------------------------------------------------------------------------------------------------------------------------------|----------|----------|----------|----------|---|---|------|----------|--|--|--|--|------|----------|----------|--|--|--|-----|----------|----------|----------|--|--|-----|----------|----------|----------|----------|--|------|----------|----------|----------|----------|----------|------|----------|----------|----------|----------|----------|-----|----------|----------|----------|----------|----------|------|----------|----------|----------|----------|----------|-----|----------|----------|----------|----------|----------|-------|----------|----------|----------|----------|----------|--|---|---|---|---|----|------|----------|--|--|--|--|-----|----------|----------|--|--|--|------|----------|----------|----------|--|--|-----|----------|----------|----------|----------|--|-------|----------|----------|----------|----------|----------|
|                                                                                                                               | 1                                                                                                                                                                                                                                                                                                                                                                                                                                                                                                                                                                                                                                                                                                                                                                                                                                                                                                                                                                                                                                                                                                                                                                                                                                                                                                                                                                                                                                                                                                                                                                                                                                                                                                                                 | 2        | 3        | 4        | 5        |   |   |      |          |  |  |  |  |      |          |          |  |  |  |     |          |          |          |  |  |     |          |          |          |          |  |      |          |          |          |          |          |      |          |          |          |          |          |     |          |          |          |          |          |      |          |          |          |          |          |     |          |          |          |          |          |       |          |          |          |          |          |  |   |   |   |   |    |      |          |  |  |  |  |     |          |          |  |  |  |      |          |          |          |  |  |     |          |          |          |          |  |       |          |          |          |          |          |
| 1 Os                                                                                                                          | 0.000000                                                                                                                                                                                                                                                                                                                                                                                                                                                                                                                                                                                                                                                                                                                                                                                                                                                                                                                                                                                                                                                                                                                                                                                                                                                                                                                                                                                                                                                                                                                                                                                                                                                                                                                          |          |          |          |          |   |   |      |          |  |  |  |  |      |          |          |  |  |  |     |          |          |          |  |  |     |          |          |          |          |  |      |          |          |          |          |          |      |          |          |          |          |          |     |          |          |          |          |          |      |          |          |          |          |          |     |          |          |          |          |          |       |          |          |          |          |          |  |   |   |   |   |    |      |          |  |  |  |  |     |          |          |  |  |  |      |          |          |          |  |  |     |          |          |          |          |  |       |          |          |          |          |          |
| 2 Os                                                                                                                          | 2.813000                                                                                                                                                                                                                                                                                                                                                                                                                                                                                                                                                                                                                                                                                                                                                                                                                                                                                                                                                                                                                                                                                                                                                                                                                                                                                                                                                                                                                                                                                                                                                                                                                                                                                                                          | 0.000000 |          |          |          |   |   |      |          |  |  |  |  |      |          |          |  |  |  |     |          |          |          |  |  |     |          |          |          |          |  |      |          |          |          |          |          |      |          |          |          |          |          |     |          |          |          |          |          |      |          |          |          |          |          |     |          |          |          |          |          |       |          |          |          |          |          |  |   |   |   |   |    |      |          |  |  |  |  |     |          |          |  |  |  |      |          |          |          |  |  |     |          |          |          |          |  |       |          |          |          |          |          |
| 3 B                                                                                                                           | 2.326819                                                                                                                                                                                                                                                                                                                                                                                                                                                                                                                                                                                                                                                                                                                                                                                                                                                                                                                                                                                                                                                                                                                                                                                                                                                                                                                                                                                                                                                                                                                                                                                                                                                                                                                          | 2.326819 | 0.000000 |          |          |   |   |      |          |  |  |  |  |      |          |          |  |  |  |     |          |          |          |  |  |     |          |          |          |          |  |      |          |          |          |          |          |      |          |          |          |          |          |     |          |          |          |          |          |      |          |          |          |          |          |     |          |          |          |          |          |       |          |          |          |          |          |  |   |   |   |   |    |      |          |  |  |  |  |     |          |          |  |  |  |      |          |          |          |  |  |     |          |          |          |          |  |       |          |          |          |          |          |
| 4 B                                                                                                                           | 2.324591                                                                                                                                                                                                                                                                                                                                                                                                                                                                                                                                                                                                                                                                                                                                                                                                                                                                                                                                                                                                                                                                                                                                                                                                                                                                                                                                                                                                                                                                                                                                                                                                                                                                                                                          | 3.228853 | 2.724559 | 0.000000 |          |   |   |      |          |  |  |  |  |      |          |          |  |  |  |     |          |          |          |  |  |     |          |          |          |          |  |      |          |          |          |          |          |      |          |          |          |          |          |     |          |          |          |          |          |      |          |          |          |          |          |     |          |          |          |          |          |       |          |          |          |          |          |  |   |   |   |   |    |      |          |  |  |  |  |     |          |          |  |  |  |      |          |          |          |  |  |     |          |          |          |          |  |       |          |          |          |          |          |
| 5 B                                                                                                                           | 3.182018                                                                                                                                                                                                                                                                                                                                                                                                                                                                                                                                                                                                                                                                                                                                                                                                                                                                                                                                                                                                                                                                                                                                                                                                                                                                                                                                                                                                                                                                                                                                                                                                                                                                                                                          | 3.182018 | 1.988548 | 1.787587 | 0.000000 |   |   |      |          |  |  |  |  |      |          |          |  |  |  |     |          |          |          |  |  |     |          |          |          |          |  |      |          |          |          |          |          |      |          |          |          |          |          |     |          |          |          |          |          |      |          |          |          |          |          |     |          |          |          |          |          |       |          |          |          |          |          |  |   |   |   |   |    |      |          |  |  |  |  |     |          |          |  |  |  |      |          |          |          |  |  |     |          |          |          |          |  |       |          |          |          |          |          |
| 6 B                                                                                                                           | 3.228853                                                                                                                                                                                                                                                                                                                                                                                                                                                                                                                                                                                                                                                                                                                                                                                                                                                                                                                                                                                                                                                                                                                                                                                                                                                                                                                                                                                                                                                                                                                                                                                                                                                                                                                          | 2.324591 | 2.724559 | 1.785200 | 1.787587 |   |   |      |          |  |  |  |  |      |          |          |  |  |  |     |          |          |          |  |  |     |          |          |          |          |  |      |          |          |          |          |          |      |          |          |          |          |          |     |          |          |          |          |          |      |          |          |          |          |          |     |          |          |          |          |          |       |          |          |          |          |          |  |   |   |   |   |    |      |          |  |  |  |  |     |          |          |  |  |  |      |          |          |          |  |  |     |          |          |          |          |  |       |          |          |          |          |          |
| 7 B                                                                                                                           | 2.067467                                                                                                                                                                                                                                                                                                                                                                                                                                                                                                                                                                                                                                                                                                                                                                                                                                                                                                                                                                                                                                                                                                                                                                                                                                                                                                                                                                                                                                                                                                                                                                                                                                                                                                                          | 2.067467 | 1.894208 | 3.715093 | 3.688356 |   |   |      |          |  |  |  |  |      |          |          |  |  |  |     |          |          |          |  |  |     |          |          |          |          |  |      |          |          |          |          |          |      |          |          |          |          |          |     |          |          |          |          |          |      |          |          |          |          |          |     |          |          |          |          |          |       |          |          |          |          |          |  |   |   |   |   |    |      |          |  |  |  |  |     |          |          |  |  |  |      |          |          |          |  |  |     |          |          |          |          |  |       |          |          |          |          |          |
| 8 B                                                                                                                           | 3.549145                                                                                                                                                                                                                                                                                                                                                                                                                                                                                                                                                                                                                                                                                                                                                                                                                                                                                                                                                                                                                                                                                                                                                                                                                                                                                                                                                                                                                                                                                                                                                                                                                                                                                                                          | 2.070059 | 1.838285 | 2.894865 | 1.749516 |   |   |      |          |  |  |  |  |      |          |          |  |  |  |     |          |          |          |  |  |     |          |          |          |          |  |      |          |          |          |          |          |      |          |          |          |          |          |     |          |          |          |          |          |      |          |          |          |          |          |     |          |          |          |          |          |       |          |          |          |          |          |  |   |   |   |   |    |      |          |  |  |  |  |     |          |          |  |  |  |      |          |          |          |  |  |     |          |          |          |          |  |       |          |          |          |          |          |
| 9 B                                                                                                                           | 2.070059                                                                                                                                                                                                                                                                                                                                                                                                                                                                                                                                                                                                                                                                                                                                                                                                                                                                                                                                                                                                                                                                                                                                                                                                                                                                                                                                                                                                                                                                                                                                                                                                                                                                                                                          | 3.549145 | 1.838285 | 1.762298 | 1.749516 |   |   |      |          |  |  |  |  |      |          |          |  |  |  |     |          |          |          |  |  |     |          |          |          |          |  |      |          |          |          |          |          |      |          |          |          |          |          |     |          |          |          |          |          |      |          |          |          |          |          |     |          |          |          |          |          |       |          |          |          |          |          |  |   |   |   |   |    |      |          |  |  |  |  |     |          |          |  |  |  |      |          |          |          |  |  |     |          |          |          |          |  |       |          |          |          |          |          |
| 10 B                                                                                                                          | 2.150369                                                                                                                                                                                                                                                                                                                                                                                                                                                                                                                                                                                                                                                                                                                                                                                                                                                                                                                                                                                                                                                                                                                                                                                                                                                                                                                                                                                                                                                                                                                                                                                                                                                                                                                          | 2.150369 | 3.016690 | 1.796622 | 2.928043 |   |   |      |          |  |  |  |  |      |          |          |  |  |  |     |          |          |          |  |  |     |          |          |          |          |  |      |          |          |          |          |          |      |          |          |          |          |          |     |          |          |          |          |          |      |          |          |          |          |          |     |          |          |          |          |          |       |          |          |          |          |          |  |   |   |   |   |    |      |          |  |  |  |  |     |          |          |  |  |  |      |          |          |          |  |  |     |          |          |          |          |  |       |          |          |          |          |          |
|                                                                                                                               | 6                                                                                                                                                                                                                                                                                                                                                                                                                                                                                                                                                                                                                                                                                                                                                                                                                                                                                                                                                                                                                                                                                                                                                                                                                                                                                                                                                                                                                                                                                                                                                                                                                                                                                                                                 | 7        | 8        | 9        | 10       |   |   |      |          |  |  |  |  |      |          |          |  |  |  |     |          |          |          |  |  |     |          |          |          |          |  |      |          |          |          |          |          |      |          |          |          |          |          |     |          |          |          |          |          |      |          |          |          |          |          |     |          |          |          |          |          |       |          |          |          |          |          |  |   |   |   |   |    |      |          |  |  |  |  |     |          |          |  |  |  |      |          |          |          |  |  |     |          |          |          |          |  |       |          |          |          |          |          |
| 6 B                                                                                                                           | 0.000000                                                                                                                                                                                                                                                                                                                                                                                                                                                                                                                                                                                                                                                                                                                                                                                                                                                                                                                                                                                                                                                                                                                                                                                                                                                                                                                                                                                                                                                                                                                                                                                                                                                                                                                          |          |          |          |          |   |   |      |          |  |  |  |  |      |          |          |  |  |  |     |          |          |          |  |  |     |          |          |          |          |  |      |          |          |          |          |          |      |          |          |          |          |          |     |          |          |          |          |          |      |          |          |          |          |          |     |          |          |          |          |          |       |          |          |          |          |          |  |   |   |   |   |    |      |          |  |  |  |  |     |          |          |  |  |  |      |          |          |          |  |  |     |          |          |          |          |  |       |          |          |          |          |          |
| 7 B                                                                                                                           | 3.715093                                                                                                                                                                                                                                                                                                                                                                                                                                                                                                                                                                                                                                                                                                                                                                                                                                                                                                                                                                                                                                                                                                                                                                                                                                                                                                                                                                                                                                                                                                                                                                                                                                                                                                                          | 0.000000 |          |          |          |   |   |      |          |  |  |  |  |      |          |          |  |  |  |     |          |          |          |  |  |     |          |          |          |          |  |      |          |          |          |          |          |      |          |          |          |          |          |     |          |          |          |          |          |      |          |          |          |          |          |     |          |          |          |          |          |       |          |          |          |          |          |  |   |   |   |   |    |      |          |  |  |  |  |     |          |          |  |  |  |      |          |          |          |  |  |     |          |          |          |          |  |       |          |          |          |          |          |
| 8 B                                                                                                                           | 1.762298                                                                                                                                                                                                                                                                                                                                                                                                                                                                                                                                                                                                                                                                                                                                                                                                                                                                                                                                                                                                                                                                                                                                                                                                                                                                                                                                                                                                                                                                                                                                                                                                                                                                                                                          | 3.126935 | 0.000000 |          |          |   |   |      |          |  |  |  |  |      |          |          |  |  |  |     |          |          |          |  |  |     |          |          |          |          |  |      |          |          |          |          |          |      |          |          |          |          |          |     |          |          |          |          |          |      |          |          |          |          |          |     |          |          |          |          |          |       |          |          |          |          |          |  |   |   |   |   |    |      |          |  |  |  |  |     |          |          |  |  |  |      |          |          |          |  |  |     |          |          |          |          |  |       |          |          |          |          |          |
| 9 B                                                                                                                           | 2.894865                                                                                                                                                                                                                                                                                                                                                                                                                                                                                                                                                                                                                                                                                                                                                                                                                                                                                                                                                                                                                                                                                                                                                                                                                                                                                                                                                                                                                                                                                                                                                                                                                                                                                                                          | 3.126935 | 2.954600 | 0.000000 |          |   |   |      |          |  |  |  |  |      |          |          |  |  |  |     |          |          |          |  |  |     |          |          |          |          |  |      |          |          |          |          |          |      |          |          |          |          |          |     |          |          |          |          |          |      |          |          |          |          |          |     |          |          |          |          |          |       |          |          |          |          |          |  |   |   |   |   |    |      |          |  |  |  |  |     |          |          |  |  |  |      |          |          |          |  |  |     |          |          |          |          |  |       |          |          |          |          |          |
| 10 B                                                                                                                          | 1.796622                                                                                                                                                                                                                                                                                                                                                                                                                                                                                                                                                                                                                                                                                                                                                                                                                                                                                                                                                                                                                                                                                                                                                                                                                                                                                                                                                                                                                                                                                                                                                                                                                                                                                                                          | 3.135015 | 2.983771 | 2.983771 | 0.000000 |   |   |      |          |  |  |  |  |      |          |          |  |  |  |     |          |          |          |  |  |     |          |          |          |          |  |      |          |          |          |          |          |      |          |          |          |          |          |     |          |          |          |          |          |      |          |          |          |          |          |     |          |          |          |          |          |       |          |          |          |          |          |  |   |   |   |   |    |      |          |  |  |  |  |     |          |          |  |  |  |      |          |          |          |  |  |     |          |          |          |          |  |       |          |          |          |          |          |
|  <p>2. -772.30897769 +7.2 C<sub>s</sub></p> | <table border="1"> <thead> <tr> <th></th> <th>1</th> <th>2</th> <th>3</th> <th>4</th> <th>5</th> </tr> </thead> <tbody> <tr><td>1 B</td><td>0.000000</td><td></td><td></td><td></td><td></td></tr> <tr><td>2 B</td><td>1.774957</td><td>0.000000</td><td></td><td></td><td></td></tr> <tr><td>3 B</td><td>2.737384</td><td>2.117200</td><td>0.000000</td><td></td><td></td></tr> <tr><td>4 B</td><td>1.751246</td><td>2.925962</td><td>2.925962</td><td>0.000000</td><td></td></tr> <tr><td>5 Os</td><td>3.289056</td><td>3.284192</td><td>2.193633</td><td>2.243500</td><td>0.000000</td></tr> <tr><td>6 Os</td><td>2.242816</td><td>2.193633</td><td>3.284192</td><td>2.243500</td><td>2.821600</td></tr> <tr><td>7 B</td><td>3.009552</td><td>1.914401</td><td>1.914401</td><td>3.073184</td><td>2.118308</td></tr> <tr><td>8 B</td><td>2.051200</td><td>2.737384</td><td>1.774957</td><td>1.751246</td><td>2.242816</td></tr> <tr><td>9 B</td><td>1.786314</td><td>1.689608</td><td>1.689608</td><td>2.852770</td><td>3.374257</td></tr> <tr><td>10 B</td><td>3.161225</td><td>3.750272</td><td>3.750272</td><td>1.760452</td><td>2.086219</td></tr> <tr> <td></td> <td>6</td> <td>7</td> <td>8</td> <td>9</td> <td>10</td> </tr> <tr><td>6 Os</td><td>0.000000</td><td></td><td></td><td></td><td></td></tr> <tr><td>7 B</td><td>2.118308</td><td>0.000000</td><td></td><td></td><td></td></tr> <tr><td>8 B</td><td>3.289056</td><td>3.009552</td><td>0.000000</td><td></td><td></td></tr> <tr><td>9 B</td><td>3.374257</td><td>2.896524</td><td>1.786314</td><td>0.000000</td><td></td></tr> <tr><td>10 B</td><td>2.086219</td><td>3.071415</td><td>3.161225</td><td>4.232745</td><td>0.000000</td></tr> </tbody> </table>  |          | 1        | 2        | 3        | 4 | 5 | 1 B  | 0.000000 |  |  |  |  | 2 B  | 1.774957 | 0.000000 |  |  |  | 3 B | 2.737384 | 2.117200 | 0.000000 |  |  | 4 B | 1.751246 | 2.925962 | 2.925962 | 0.000000 |  | 5 Os | 3.289056 | 3.284192 | 2.193633 | 2.243500 | 0.000000 | 6 Os | 2.242816 | 2.193633 | 3.284192 | 2.243500 | 2.821600 | 7 B | 3.009552 | 1.914401 | 1.914401 | 3.073184 | 2.118308 | 8 B  | 2.051200 | 2.737384 | 1.774957 | 1.751246 | 2.242816 | 9 B | 1.786314 | 1.689608 | 1.689608 | 2.852770 | 3.374257 | 10 B  | 3.161225 | 3.750272 | 3.750272 | 1.760452 | 2.086219 |  | 6 | 7 | 8 | 9 | 10 | 6 Os | 0.000000 |  |  |  |  | 7 B | 2.118308 | 0.000000 |  |  |  | 8 B  | 3.289056 | 3.009552 | 0.000000 |  |  | 9 B | 3.374257 | 2.896524 | 1.786314 | 0.000000 |  | 10 B  | 2.086219 | 3.071415 | 3.161225 | 4.232745 | 0.000000 |
|                                                                                                                               | 1                                                                                                                                                                                                                                                                                                                                                                                                                                                                                                                                                                                                                                                                                                                                                                                                                                                                                                                                                                                                                                                                                                                                                                                                                                                                                                                                                                                                                                                                                                                                                                                                                                                                                                                                 | 2        | 3        | 4        | 5        |   |   |      |          |  |  |  |  |      |          |          |  |  |  |     |          |          |          |  |  |     |          |          |          |          |  |      |          |          |          |          |          |      |          |          |          |          |          |     |          |          |          |          |          |      |          |          |          |          |          |     |          |          |          |          |          |       |          |          |          |          |          |  |   |   |   |   |    |      |          |  |  |  |  |     |          |          |  |  |  |      |          |          |          |  |  |     |          |          |          |          |  |       |          |          |          |          |          |
| 1 B                                                                                                                           | 0.000000                                                                                                                                                                                                                                                                                                                                                                                                                                                                                                                                                                                                                                                                                                                                                                                                                                                                                                                                                                                                                                                                                                                                                                                                                                                                                                                                                                                                                                                                                                                                                                                                                                                                                                                          |          |          |          |          |   |   |      |          |  |  |  |  |      |          |          |  |  |  |     |          |          |          |  |  |     |          |          |          |          |  |      |          |          |          |          |          |      |          |          |          |          |          |     |          |          |          |          |          |      |          |          |          |          |          |     |          |          |          |          |          |       |          |          |          |          |          |  |   |   |   |   |    |      |          |  |  |  |  |     |          |          |  |  |  |      |          |          |          |  |  |     |          |          |          |          |  |       |          |          |          |          |          |
| 2 B                                                                                                                           | 1.774957                                                                                                                                                                                                                                                                                                                                                                                                                                                                                                                                                                                                                                                                                                                                                                                                                                                                                                                                                                                                                                                                                                                                                                                                                                                                                                                                                                                                                                                                                                                                                                                                                                                                                                                          | 0.000000 |          |          |          |   |   |      |          |  |  |  |  |      |          |          |  |  |  |     |          |          |          |  |  |     |          |          |          |          |  |      |          |          |          |          |          |      |          |          |          |          |          |     |          |          |          |          |          |      |          |          |          |          |          |     |          |          |          |          |          |       |          |          |          |          |          |  |   |   |   |   |    |      |          |  |  |  |  |     |          |          |  |  |  |      |          |          |          |  |  |     |          |          |          |          |  |       |          |          |          |          |          |
| 3 B                                                                                                                           | 2.737384                                                                                                                                                                                                                                                                                                                                                                                                                                                                                                                                                                                                                                                                                                                                                                                                                                                                                                                                                                                                                                                                                                                                                                                                                                                                                                                                                                                                                                                                                                                                                                                                                                                                                                                          | 2.117200 | 0.000000 |          |          |   |   |      |          |  |  |  |  |      |          |          |  |  |  |     |          |          |          |  |  |     |          |          |          |          |  |      |          |          |          |          |          |      |          |          |          |          |          |     |          |          |          |          |          |      |          |          |          |          |          |     |          |          |          |          |          |       |          |          |          |          |          |  |   |   |   |   |    |      |          |  |  |  |  |     |          |          |  |  |  |      |          |          |          |  |  |     |          |          |          |          |  |       |          |          |          |          |          |
| 4 B                                                                                                                           | 1.751246                                                                                                                                                                                                                                                                                                                                                                                                                                                                                                                                                                                                                                                                                                                                                                                                                                                                                                                                                                                                                                                                                                                                                                                                                                                                                                                                                                                                                                                                                                                                                                                                                                                                                                                          | 2.925962 | 2.925962 | 0.000000 |          |   |   |      |          |  |  |  |  |      |          |          |  |  |  |     |          |          |          |  |  |     |          |          |          |          |  |      |          |          |          |          |          |      |          |          |          |          |          |     |          |          |          |          |          |      |          |          |          |          |          |     |          |          |          |          |          |       |          |          |          |          |          |  |   |   |   |   |    |      |          |  |  |  |  |     |          |          |  |  |  |      |          |          |          |  |  |     |          |          |          |          |  |       |          |          |          |          |          |
| 5 Os                                                                                                                          | 3.289056                                                                                                                                                                                                                                                                                                                                                                                                                                                                                                                                                                                                                                                                                                                                                                                                                                                                                                                                                                                                                                                                                                                                                                                                                                                                                                                                                                                                                                                                                                                                                                                                                                                                                                                          | 3.284192 | 2.193633 | 2.243500 | 0.000000 |   |   |      |          |  |  |  |  |      |          |          |  |  |  |     |          |          |          |  |  |     |          |          |          |          |  |      |          |          |          |          |          |      |          |          |          |          |          |     |          |          |          |          |          |      |          |          |          |          |          |     |          |          |          |          |          |       |          |          |          |          |          |  |   |   |   |   |    |      |          |  |  |  |  |     |          |          |  |  |  |      |          |          |          |  |  |     |          |          |          |          |  |       |          |          |          |          |          |
| 6 Os                                                                                                                          | 2.242816                                                                                                                                                                                                                                                                                                                                                                                                                                                                                                                                                                                                                                                                                                                                                                                                                                                                                                                                                                                                                                                                                                                                                                                                                                                                                                                                                                                                                                                                                                                                                                                                                                                                                                                          | 2.193633 | 3.284192 | 2.243500 | 2.821600 |   |   |      |          |  |  |  |  |      |          |          |  |  |  |     |          |          |          |  |  |     |          |          |          |          |  |      |          |          |          |          |          |      |          |          |          |          |          |     |          |          |          |          |          |      |          |          |          |          |          |     |          |          |          |          |          |       |          |          |          |          |          |  |   |   |   |   |    |      |          |  |  |  |  |     |          |          |  |  |  |      |          |          |          |  |  |     |          |          |          |          |  |       |          |          |          |          |          |
| 7 B                                                                                                                           | 3.009552                                                                                                                                                                                                                                                                                                                                                                                                                                                                                                                                                                                                                                                                                                                                                                                                                                                                                                                                                                                                                                                                                                                                                                                                                                                                                                                                                                                                                                                                                                                                                                                                                                                                                                                          | 1.914401 | 1.914401 | 3.073184 | 2.118308 |   |   |      |          |  |  |  |  |      |          |          |  |  |  |     |          |          |          |  |  |     |          |          |          |          |  |      |          |          |          |          |          |      |          |          |          |          |          |     |          |          |          |          |          |      |          |          |          |          |          |     |          |          |          |          |          |       |          |          |          |          |          |  |   |   |   |   |    |      |          |  |  |  |  |     |          |          |  |  |  |      |          |          |          |  |  |     |          |          |          |          |  |       |          |          |          |          |          |
| 8 B                                                                                                                           | 2.051200                                                                                                                                                                                                                                                                                                                                                                                                                                                                                                                                                                                                                                                                                                                                                                                                                                                                                                                                                                                                                                                                                                                                                                                                                                                                                                                                                                                                                                                                                                                                                                                                                                                                                                                          | 2.737384 | 1.774957 | 1.751246 | 2.242816 |   |   |      |          |  |  |  |  |      |          |          |  |  |  |     |          |          |          |  |  |     |          |          |          |          |  |      |          |          |          |          |          |      |          |          |          |          |          |     |          |          |          |          |          |      |          |          |          |          |          |     |          |          |          |          |          |       |          |          |          |          |          |  |   |   |   |   |    |      |          |  |  |  |  |     |          |          |  |  |  |      |          |          |          |  |  |     |          |          |          |          |  |       |          |          |          |          |          |
| 9 B                                                                                                                           | 1.786314                                                                                                                                                                                                                                                                                                                                                                                                                                                                                                                                                                                                                                                                                                                                                                                                                                                                                                                                                                                                                                                                                                                                                                                                                                                                                                                                                                                                                                                                                                                                                                                                                                                                                                                          | 1.689608 | 1.689608 | 2.852770 | 3.374257 |   |   |      |          |  |  |  |  |      |          |          |  |  |  |     |          |          |          |  |  |     |          |          |          |          |  |      |          |          |          |          |          |      |          |          |          |          |          |     |          |          |          |          |          |      |          |          |          |          |          |     |          |          |          |          |          |       |          |          |          |          |          |  |   |   |   |   |    |      |          |  |  |  |  |     |          |          |  |  |  |      |          |          |          |  |  |     |          |          |          |          |  |       |          |          |          |          |          |
| 10 B                                                                                                                          | 3.161225                                                                                                                                                                                                                                                                                                                                                                                                                                                                                                                                                                                                                                                                                                                                                                                                                                                                                                                                                                                                                                                                                                                                                                                                                                                                                                                                                                                                                                                                                                                                                                                                                                                                                                                          | 3.750272 | 3.750272 | 1.760452 | 2.086219 |   |   |      |          |  |  |  |  |      |          |          |  |  |  |     |          |          |          |  |  |     |          |          |          |          |  |      |          |          |          |          |          |      |          |          |          |          |          |     |          |          |          |          |          |      |          |          |          |          |          |     |          |          |          |          |          |       |          |          |          |          |          |  |   |   |   |   |    |      |          |  |  |  |  |     |          |          |  |  |  |      |          |          |          |  |  |     |          |          |          |          |  |       |          |          |          |          |          |
|                                                                                                                               | 6                                                                                                                                                                                                                                                                                                                                                                                                                                                                                                                                                                                                                                                                                                                                                                                                                                                                                                                                                                                                                                                                                                                                                                                                                                                                                                                                                                                                                                                                                                                                                                                                                                                                                                                                 | 7        | 8        | 9        | 10       |   |   |      |          |  |  |  |  |      |          |          |  |  |  |     |          |          |          |  |  |     |          |          |          |          |  |      |          |          |          |          |          |      |          |          |          |          |          |     |          |          |          |          |          |      |          |          |          |          |          |     |          |          |          |          |          |       |          |          |          |          |          |  |   |   |   |   |    |      |          |  |  |  |  |     |          |          |  |  |  |      |          |          |          |  |  |     |          |          |          |          |  |       |          |          |          |          |          |
| 6 Os                                                                                                                          | 0.000000                                                                                                                                                                                                                                                                                                                                                                                                                                                                                                                                                                                                                                                                                                                                                                                                                                                                                                                                                                                                                                                                                                                                                                                                                                                                                                                                                                                                                                                                                                                                                                                                                                                                                                                          |          |          |          |          |   |   |      |          |  |  |  |  |      |          |          |  |  |  |     |          |          |          |  |  |     |          |          |          |          |  |      |          |          |          |          |          |      |          |          |          |          |          |     |          |          |          |          |          |      |          |          |          |          |          |     |          |          |          |          |          |       |          |          |          |          |          |  |   |   |   |   |    |      |          |  |  |  |  |     |          |          |  |  |  |      |          |          |          |  |  |     |          |          |          |          |  |       |          |          |          |          |          |
| 7 B                                                                                                                           | 2.118308                                                                                                                                                                                                                                                                                                                                                                                                                                                                                                                                                                                                                                                                                                                                                                                                                                                                                                                                                                                                                                                                                                                                                                                                                                                                                                                                                                                                                                                                                                                                                                                                                                                                                                                          | 0.000000 |          |          |          |   |   |      |          |  |  |  |  |      |          |          |  |  |  |     |          |          |          |  |  |     |          |          |          |          |  |      |          |          |          |          |          |      |          |          |          |          |          |     |          |          |          |          |          |      |          |          |          |          |          |     |          |          |          |          |          |       |          |          |          |          |          |  |   |   |   |   |    |      |          |  |  |  |  |     |          |          |  |  |  |      |          |          |          |  |  |     |          |          |          |          |  |       |          |          |          |          |          |
| 8 B                                                                                                                           | 3.289056                                                                                                                                                                                                                                                                                                                                                                                                                                                                                                                                                                                                                                                                                                                                                                                                                                                                                                                                                                                                                                                                                                                                                                                                                                                                                                                                                                                                                                                                                                                                                                                                                                                                                                                          | 3.009552 | 0.000000 |          |          |   |   |      |          |  |  |  |  |      |          |          |  |  |  |     |          |          |          |  |  |     |          |          |          |          |  |      |          |          |          |          |          |      |          |          |          |          |          |     |          |          |          |          |          |      |          |          |          |          |          |     |          |          |          |          |          |       |          |          |          |          |          |  |   |   |   |   |    |      |          |  |  |  |  |     |          |          |  |  |  |      |          |          |          |  |  |     |          |          |          |          |  |       |          |          |          |          |          |
| 9 B                                                                                                                           | 3.374257                                                                                                                                                                                                                                                                                                                                                                                                                                                                                                                                                                                                                                                                                                                                                                                                                                                                                                                                                                                                                                                                                                                                                                                                                                                                                                                                                                                                                                                                                                                                                                                                                                                                                                                          | 2.896524 | 1.786314 | 0.000000 |          |   |   |      |          |  |  |  |  |      |          |          |  |  |  |     |          |          |          |  |  |     |          |          |          |          |  |      |          |          |          |          |          |      |          |          |          |          |          |     |          |          |          |          |          |      |          |          |          |          |          |     |          |          |          |          |          |       |          |          |          |          |          |  |   |   |   |   |    |      |          |  |  |  |  |     |          |          |  |  |  |      |          |          |          |  |  |     |          |          |          |          |  |       |          |          |          |          |          |
| 10 B                                                                                                                          | 2.086219                                                                                                                                                                                                                                                                                                                                                                                                                                                                                                                                                                                                                                                                                                                                                                                                                                                                                                                                                                                                                                                                                                                                                                                                                                                                                                                                                                                                                                                                                                                                                                                                                                                                                                                          | 3.071415 | 3.161225 | 4.232745 | 0.000000 |   |   |      |          |  |  |  |  |      |          |          |  |  |  |     |          |          |          |  |  |     |          |          |          |          |  |      |          |          |          |          |          |      |          |          |          |          |          |     |          |          |          |          |          |      |          |          |          |          |          |     |          |          |          |          |          |       |          |          |          |          |          |  |   |   |   |   |    |      |          |  |  |  |  |     |          |          |  |  |  |      |          |          |          |  |  |     |          |          |          |          |  |       |          |          |          |          |          |
|  <p>3. -772.30445470 +10.1</p>             | <table border="1"> <thead> <tr> <th></th> <th>1</th> <th>2</th> <th>3</th> <th>4</th> <th>5</th> </tr> </thead> <tbody> <tr><td>1 B</td><td>0.000000</td><td></td><td></td><td></td><td></td></tr> <tr><td>2 B</td><td>1.922867</td><td>0.000000</td><td></td><td></td><td></td></tr> <tr><td>3 B</td><td>1.864709</td><td>1.829790</td><td>0.000000</td><td></td><td></td></tr> <tr><td>4 B</td><td>1.775594</td><td>2.987379</td><td>1.680899</td><td>0.000000</td><td></td></tr> <tr><td>5 B</td><td>1.778467</td><td>3.138037</td><td>2.787014</td><td>1.697360</td><td>0.000000</td></tr> <tr><td>6 B</td><td>3.097767</td><td>1.799729</td><td>2.808387</td><td>3.647818</td><td>3.394615</td></tr> <tr><td>7 B</td><td>2.981357</td><td>1.708341</td><td>1.692710</td><td>3.055913</td><td>3.639293</td></tr> <tr><td>8 Os</td><td>2.960485</td><td>2.978835</td><td>2.356869</td><td>2.226396</td><td>2.336488</td></tr> <tr><td>9 B</td><td>3.175940</td><td>3.684165</td><td>3.762202</td><td>3.104836</td><td>1.814476</td></tr> <tr><td>10 Os</td><td>2.242496</td><td>2.275149</td><td>3.253749</td><td>3.285313</td><td>2.186281</td></tr> <tr> <td></td> <td>6</td> <td>7</td> <td>8</td> <td>9</td> <td>10</td> </tr> <tr><td>6 B</td><td>0.000000</td><td></td><td></td><td></td><td></td></tr> <tr><td>7 B</td><td>1.709664</td><td>0.000000</td><td></td><td></td><td></td></tr> <tr><td>8 Os</td><td>2.381104</td><td>2.268570</td><td>0.000000</td><td></td><td></td></tr> <tr><td>9 B</td><td>2.977776</td><td>3.833457</td><td>2.122307</td><td>0.000000</td><td></td></tr> <tr><td>10 Os</td><td>2.095775</td><td>3.231660</td><td>2.868600</td><td>2.044819</td><td>0.000000</td></tr> </tbody> </table> |          | 1        | 2        | 3        | 4 | 5 | 1 B  | 0.000000 |  |  |  |  | 2 B  | 1.922867 | 0.000000 |  |  |  | 3 B | 1.864709 | 1.829790 | 0.000000 |  |  | 4 B | 1.775594 | 2.987379 | 1.680899 | 0.000000 |  | 5 B  | 1.778467 | 3.138037 | 2.787014 | 1.697360 | 0.000000 | 6 B  | 3.097767 | 1.799729 | 2.808387 | 3.647818 | 3.394615 | 7 B | 2.981357 | 1.708341 | 1.692710 | 3.055913 | 3.639293 | 8 Os | 2.960485 | 2.978835 | 2.356869 | 2.226396 | 2.336488 | 9 B | 3.175940 | 3.684165 | 3.762202 | 3.104836 | 1.814476 | 10 Os | 2.242496 | 2.275149 | 3.253749 | 3.285313 | 2.186281 |  | 6 | 7 | 8 | 9 | 10 | 6 B  | 0.000000 |  |  |  |  | 7 B | 1.709664 | 0.000000 |  |  |  | 8 Os | 2.381104 | 2.268570 | 0.000000 |  |  | 9 B | 2.977776 | 3.833457 | 2.122307 | 0.000000 |  | 10 Os | 2.095775 | 3.231660 | 2.868600 | 2.044819 | 0.000000 |
|                                                                                                                               | 1                                                                                                                                                                                                                                                                                                                                                                                                                                                                                                                                                                                                                                                                                                                                                                                                                                                                                                                                                                                                                                                                                                                                                                                                                                                                                                                                                                                                                                                                                                                                                                                                                                                                                                                                 | 2        | 3        | 4        | 5        |   |   |      |          |  |  |  |  |      |          |          |  |  |  |     |          |          |          |  |  |     |          |          |          |          |  |      |          |          |          |          |          |      |          |          |          |          |          |     |          |          |          |          |          |      |          |          |          |          |          |     |          |          |          |          |          |       |          |          |          |          |          |  |   |   |   |   |    |      |          |  |  |  |  |     |          |          |  |  |  |      |          |          |          |  |  |     |          |          |          |          |  |       |          |          |          |          |          |
| 1 B                                                                                                                           | 0.000000                                                                                                                                                                                                                                                                                                                                                                                                                                                                                                                                                                                                                                                                                                                                                                                                                                                                                                                                                                                                                                                                                                                                                                                                                                                                                                                                                                                                                                                                                                                                                                                                                                                                                                                          |          |          |          |          |   |   |      |          |  |  |  |  |      |          |          |  |  |  |     |          |          |          |  |  |     |          |          |          |          |  |      |          |          |          |          |          |      |          |          |          |          |          |     |          |          |          |          |          |      |          |          |          |          |          |     |          |          |          |          |          |       |          |          |          |          |          |  |   |   |   |   |    |      |          |  |  |  |  |     |          |          |  |  |  |      |          |          |          |  |  |     |          |          |          |          |  |       |          |          |          |          |          |
| 2 B                                                                                                                           | 1.922867                                                                                                                                                                                                                                                                                                                                                                                                                                                                                                                                                                                                                                                                                                                                                                                                                                                                                                                                                                                                                                                                                                                                                                                                                                                                                                                                                                                                                                                                                                                                                                                                                                                                                                                          | 0.000000 |          |          |          |   |   |      |          |  |  |  |  |      |          |          |  |  |  |     |          |          |          |  |  |     |          |          |          |          |  |      |          |          |          |          |          |      |          |          |          |          |          |     |          |          |          |          |          |      |          |          |          |          |          |     |          |          |          |          |          |       |          |          |          |          |          |  |   |   |   |   |    |      |          |  |  |  |  |     |          |          |  |  |  |      |          |          |          |  |  |     |          |          |          |          |  |       |          |          |          |          |          |
| 3 B                                                                                                                           | 1.864709                                                                                                                                                                                                                                                                                                                                                                                                                                                                                                                                                                                                                                                                                                                                                                                                                                                                                                                                                                                                                                                                                                                                                                                                                                                                                                                                                                                                                                                                                                                                                                                                                                                                                                                          | 1.829790 | 0.000000 |          |          |   |   |      |          |  |  |  |  |      |          |          |  |  |  |     |          |          |          |  |  |     |          |          |          |          |  |      |          |          |          |          |          |      |          |          |          |          |          |     |          |          |          |          |          |      |          |          |          |          |          |     |          |          |          |          |          |       |          |          |          |          |          |  |   |   |   |   |    |      |          |  |  |  |  |     |          |          |  |  |  |      |          |          |          |  |  |     |          |          |          |          |  |       |          |          |          |          |          |
| 4 B                                                                                                                           | 1.775594                                                                                                                                                                                                                                                                                                                                                                                                                                                                                                                                                                                                                                                                                                                                                                                                                                                                                                                                                                                                                                                                                                                                                                                                                                                                                                                                                                                                                                                                                                                                                                                                                                                                                                                          | 2.987379 | 1.680899 | 0.000000 |          |   |   |      |          |  |  |  |  |      |          |          |  |  |  |     |          |          |          |  |  |     |          |          |          |          |  |      |          |          |          |          |          |      |          |          |          |          |          |     |          |          |          |          |          |      |          |          |          |          |          |     |          |          |          |          |          |       |          |          |          |          |          |  |   |   |   |   |    |      |          |  |  |  |  |     |          |          |  |  |  |      |          |          |          |  |  |     |          |          |          |          |  |       |          |          |          |          |          |
| 5 B                                                                                                                           | 1.778467                                                                                                                                                                                                                                                                                                                                                                                                                                                                                                                                                                                                                                                                                                                                                                                                                                                                                                                                                                                                                                                                                                                                                                                                                                                                                                                                                                                                                                                                                                                                                                                                                                                                                                                          | 3.138037 | 2.787014 | 1.697360 | 0.000000 |   |   |      |          |  |  |  |  |      |          |          |  |  |  |     |          |          |          |  |  |     |          |          |          |          |  |      |          |          |          |          |          |      |          |          |          |          |          |     |          |          |          |          |          |      |          |          |          |          |          |     |          |          |          |          |          |       |          |          |          |          |          |  |   |   |   |   |    |      |          |  |  |  |  |     |          |          |  |  |  |      |          |          |          |  |  |     |          |          |          |          |  |       |          |          |          |          |          |
| 6 B                                                                                                                           | 3.097767                                                                                                                                                                                                                                                                                                                                                                                                                                                                                                                                                                                                                                                                                                                                                                                                                                                                                                                                                                                                                                                                                                                                                                                                                                                                                                                                                                                                                                                                                                                                                                                                                                                                                                                          | 1.799729 | 2.808387 | 3.647818 | 3.394615 |   |   |      |          |  |  |  |  |      |          |          |  |  |  |     |          |          |          |  |  |     |          |          |          |          |  |      |          |          |          |          |          |      |          |          |          |          |          |     |          |          |          |          |          |      |          |          |          |          |          |     |          |          |          |          |          |       |          |          |          |          |          |  |   |   |   |   |    |      |          |  |  |  |  |     |          |          |  |  |  |      |          |          |          |  |  |     |          |          |          |          |  |       |          |          |          |          |          |
| 7 B                                                                                                                           | 2.981357                                                                                                                                                                                                                                                                                                                                                                                                                                                                                                                                                                                                                                                                                                                                                                                                                                                                                                                                                                                                                                                                                                                                                                                                                                                                                                                                                                                                                                                                                                                                                                                                                                                                                                                          | 1.708341 | 1.692710 | 3.055913 | 3.639293 |   |   |      |          |  |  |  |  |      |          |          |  |  |  |     |          |          |          |  |  |     |          |          |          |          |  |      |          |          |          |          |          |      |          |          |          |          |          |     |          |          |          |          |          |      |          |          |          |          |          |     |          |          |          |          |          |       |          |          |          |          |          |  |   |   |   |   |    |      |          |  |  |  |  |     |          |          |  |  |  |      |          |          |          |  |  |     |          |          |          |          |  |       |          |          |          |          |          |
| 8 Os                                                                                                                          | 2.960485                                                                                                                                                                                                                                                                                                                                                                                                                                                                                                                                                                                                                                                                                                                                                                                                                                                                                                                                                                                                                                                                                                                                                                                                                                                                                                                                                                                                                                                                                                                                                                                                                                                                                                                          | 2.978835 | 2.356869 | 2.226396 | 2.336488 |   |   |      |          |  |  |  |  |      |          |          |  |  |  |     |          |          |          |  |  |     |          |          |          |          |  |      |          |          |          |          |          |      |          |          |          |          |          |     |          |          |          |          |          |      |          |          |          |          |          |     |          |          |          |          |          |       |          |          |          |          |          |  |   |   |   |   |    |      |          |  |  |  |  |     |          |          |  |  |  |      |          |          |          |  |  |     |          |          |          |          |  |       |          |          |          |          |          |
| 9 B                                                                                                                           | 3.175940                                                                                                                                                                                                                                                                                                                                                                                                                                                                                                                                                                                                                                                                                                                                                                                                                                                                                                                                                                                                                                                                                                                                                                                                                                                                                                                                                                                                                                                                                                                                                                                                                                                                                                                          | 3.684165 | 3.762202 | 3.104836 | 1.814476 |   |   |      |          |  |  |  |  |      |          |          |  |  |  |     |          |          |          |  |  |     |          |          |          |          |  |      |          |          |          |          |          |      |          |          |          |          |          |     |          |          |          |          |          |      |          |          |          |          |          |     |          |          |          |          |          |       |          |          |          |          |          |  |   |   |   |   |    |      |          |  |  |  |  |     |          |          |  |  |  |      |          |          |          |  |  |     |          |          |          |          |  |       |          |          |          |          |          |
| 10 Os                                                                                                                         | 2.242496                                                                                                                                                                                                                                                                                                                                                                                                                                                                                                                                                                                                                                                                                                                                                                                                                                                                                                                                                                                                                                                                                                                                                                                                                                                                                                                                                                                                                                                                                                                                                                                                                                                                                                                          | 2.275149 | 3.253749 | 3.285313 | 2.186281 |   |   |      |          |  |  |  |  |      |          |          |  |  |  |     |          |          |          |  |  |     |          |          |          |          |  |      |          |          |          |          |          |      |          |          |          |          |          |     |          |          |          |          |          |      |          |          |          |          |          |     |          |          |          |          |          |       |          |          |          |          |          |  |   |   |   |   |    |      |          |  |  |  |  |     |          |          |  |  |  |      |          |          |          |  |  |     |          |          |          |          |  |       |          |          |          |          |          |
|                                                                                                                               | 6                                                                                                                                                                                                                                                                                                                                                                                                                                                                                                                                                                                                                                                                                                                                                                                                                                                                                                                                                                                                                                                                                                                                                                                                                                                                                                                                                                                                                                                                                                                                                                                                                                                                                                                                 | 7        | 8        | 9        | 10       |   |   |      |          |  |  |  |  |      |          |          |  |  |  |     |          |          |          |  |  |     |          |          |          |          |  |      |          |          |          |          |          |      |          |          |          |          |          |     |          |          |          |          |          |      |          |          |          |          |          |     |          |          |          |          |          |       |          |          |          |          |          |  |   |   |   |   |    |      |          |  |  |  |  |     |          |          |  |  |  |      |          |          |          |  |  |     |          |          |          |          |  |       |          |          |          |          |          |
| 6 B                                                                                                                           | 0.000000                                                                                                                                                                                                                                                                                                                                                                                                                                                                                                                                                                                                                                                                                                                                                                                                                                                                                                                                                                                                                                                                                                                                                                                                                                                                                                                                                                                                                                                                                                                                                                                                                                                                                                                          |          |          |          |          |   |   |      |          |  |  |  |  |      |          |          |  |  |  |     |          |          |          |  |  |     |          |          |          |          |  |      |          |          |          |          |          |      |          |          |          |          |          |     |          |          |          |          |          |      |          |          |          |          |          |     |          |          |          |          |          |       |          |          |          |          |          |  |   |   |   |   |    |      |          |  |  |  |  |     |          |          |  |  |  |      |          |          |          |  |  |     |          |          |          |          |  |       |          |          |          |          |          |
| 7 B                                                                                                                           | 1.709664                                                                                                                                                                                                                                                                                                                                                                                                                                                                                                                                                                                                                                                                                                                                                                                                                                                                                                                                                                                                                                                                                                                                                                                                                                                                                                                                                                                                                                                                                                                                                                                                                                                                                                                          | 0.000000 |          |          |          |   |   |      |          |  |  |  |  |      |          |          |  |  |  |     |          |          |          |  |  |     |          |          |          |          |  |      |          |          |          |          |          |      |          |          |          |          |          |     |          |          |          |          |          |      |          |          |          |          |          |     |          |          |          |          |          |       |          |          |          |          |          |  |   |   |   |   |    |      |          |  |  |  |  |     |          |          |  |  |  |      |          |          |          |  |  |     |          |          |          |          |  |       |          |          |          |          |          |
| 8 Os                                                                                                                          | 2.381104                                                                                                                                                                                                                                                                                                                                                                                                                                                                                                                                                                                                                                                                                                                                                                                                                                                                                                                                                                                                                                                                                                                                                                                                                                                                                                                                                                                                                                                                                                                                                                                                                                                                                                                          | 2.268570 | 0.000000 |          |          |   |   |      |          |  |  |  |  |      |          |          |  |  |  |     |          |          |          |  |  |     |          |          |          |          |  |      |          |          |          |          |          |      |          |          |          |          |          |     |          |          |          |          |          |      |          |          |          |          |          |     |          |          |          |          |          |       |          |          |          |          |          |  |   |   |   |   |    |      |          |  |  |  |  |     |          |          |  |  |  |      |          |          |          |  |  |     |          |          |          |          |  |       |          |          |          |          |          |
| 9 B                                                                                                                           | 2.977776                                                                                                                                                                                                                                                                                                                                                                                                                                                                                                                                                                                                                                                                                                                                                                                                                                                                                                                                                                                                                                                                                                                                                                                                                                                                                                                                                                                                                                                                                                                                                                                                                                                                                                                          | 3.833457 | 2.122307 | 0.000000 |          |   |   |      |          |  |  |  |  |      |          |          |  |  |  |     |          |          |          |  |  |     |          |          |          |          |  |      |          |          |          |          |          |      |          |          |          |          |          |     |          |          |          |          |          |      |          |          |          |          |          |     |          |          |          |          |          |       |          |          |          |          |          |  |   |   |   |   |    |      |          |  |  |  |  |     |          |          |  |  |  |      |          |          |          |  |  |     |          |          |          |          |  |       |          |          |          |          |          |
| 10 Os                                                                                                                         | 2.095775                                                                                                                                                                                                                                                                                                                                                                                                                                                                                                                                                                                                                                                                                                                                                                                                                                                                                                                                                                                                                                                                                                                                                                                                                                                                                                                                                                                                                                                                                                                                                                                                                                                                                                                          | 3.231660 | 2.868600 | 2.044819 | 0.000000 |   |   |      |          |  |  |  |  |      |          |          |  |  |  |     |          |          |          |  |  |     |          |          |          |          |  |      |          |          |          |          |          |      |          |          |          |          |          |     |          |          |          |          |          |      |          |          |          |          |          |     |          |          |          |          |          |       |          |          |          |          |          |  |   |   |   |   |    |      |          |  |  |  |  |     |          |          |  |  |  |      |          |          |          |  |  |     |          |          |          |          |  |       |          |          |          |          |          |

| 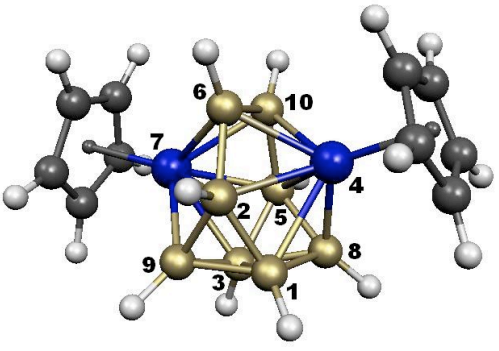 <p>4. -772.29616981 +C<sub>2</sub></p>       | <table border="1"> <thead> <tr> <th></th> <th>1</th> <th>2</th> <th>3</th> <th>4</th> <th>5</th> </tr> </thead> <tbody> <tr><td>1 B</td><td>0.000000</td><td></td><td></td><td></td><td></td></tr> <tr><td>2 B</td><td>1.735945</td><td>0.000000</td><td></td><td></td><td></td></tr> <tr><td>3 B</td><td>1.947146</td><td>2.756098</td><td>0.000000</td><td></td><td></td></tr> <tr><td>4 Os</td><td>2.330187</td><td>2.263458</td><td>3.131773</td><td>0.000000</td><td></td></tr> <tr><td>5 B</td><td>2.756098</td><td>3.026146</td><td>1.735945</td><td>2.378508</td><td>0.000000</td></tr> <tr><td>6 B</td><td>3.123437</td><td>1.728666</td><td>3.496465</td><td>2.210348</td><td>2.881623</td></tr> <tr><td>7 Os</td><td>3.131773</td><td>2.378508</td><td>2.330187</td><td>3.363257</td><td>2.263458</td></tr> <tr><td>8 B</td><td>1.785921</td><td>2.958746</td><td>1.778757</td><td>2.081506</td><td>1.763407</td></tr> <tr><td>9 B</td><td>1.778757</td><td>1.763407</td><td>1.785921</td><td>3.418193</td><td>2.958746</td></tr> <tr><td>10 B</td><td>3.496465</td><td>2.881623</td><td>3.123437</td><td>2.161675</td><td>1.728666</td></tr> <tr> <td></td> <td>6</td> <td>7</td> <td>8</td> <td>9</td> <td>10</td> </tr> <tr><td>6 B</td><td>0.000000</td><td></td><td></td><td></td><td></td></tr> <tr><td>7 Os</td><td>2.161675</td><td>0.000000</td><td></td><td></td><td></td></tr> <tr><td>8 B</td><td>3.564185</td><td>3.418193</td><td>0.000000</td><td></td><td></td></tr> <tr><td>9 B</td><td>3.011826</td><td>2.081506</td><td>2.951062</td><td>0.000000</td><td></td></tr> <tr><td>10 B</td><td>1.763397</td><td>2.210348</td><td>3.011826</td><td>3.564185</td><td>0.000000</td></tr> </tbody> </table>  |          | 1        | 2        | 3        | 4 | 5 | 1 B | 0.000000 |  |  |  |  | 2 B | 1.735945 | 0.000000 |  |  |  | 3 B  | 1.947146 | 2.756098 | 0.000000 |  |  | 4 Os | 2.330187 | 2.263458 | 3.131773 | 0.000000 |  | 5 B | 2.756098 | 3.026146 | 1.735945 | 2.378508 | 0.000000 | 6 B  | 3.123437 | 1.728666 | 3.496465 | 2.210348 | 2.881623 | 7 Os | 3.131773 | 2.378508 | 2.330187 | 3.363257 | 2.263458 | 8 B | 1.785921 | 2.958746 | 1.778757 | 2.081506 | 1.763407 | 9 B | 1.778757 | 1.763407 | 1.785921 | 3.418193 | 2.958746 | 10 B  | 3.496465 | 2.881623 | 3.123437 | 2.161675 | 1.728666 |  | 6 | 7 | 8 | 9 | 10 | 6 B  | 0.000000 |  |  |  |  | 7 Os | 2.161675 | 0.000000 |  |  |  | 8 B | 3.564185 | 3.418193 | 0.000000 |  |  | 9 B | 3.011826 | 2.081506 | 2.951062 | 0.000000 |  | 10 B  | 1.763397 | 2.210348 | 3.011826 | 3.564185 | 0.000000 |
|--------------------------------------------------------------------------------------------------------------------------------|-----------------------------------------------------------------------------------------------------------------------------------------------------------------------------------------------------------------------------------------------------------------------------------------------------------------------------------------------------------------------------------------------------------------------------------------------------------------------------------------------------------------------------------------------------------------------------------------------------------------------------------------------------------------------------------------------------------------------------------------------------------------------------------------------------------------------------------------------------------------------------------------------------------------------------------------------------------------------------------------------------------------------------------------------------------------------------------------------------------------------------------------------------------------------------------------------------------------------------------------------------------------------------------------------------------------------------------------------------------------------------------------------------------------------------------------------------------------------------------------------------------------------------------------------------------------------------------------------------------------------------------------------------------------------------------------------------------------------------------|----------|----------|----------|----------|---|---|-----|----------|--|--|--|--|-----|----------|----------|--|--|--|------|----------|----------|----------|--|--|------|----------|----------|----------|----------|--|-----|----------|----------|----------|----------|----------|------|----------|----------|----------|----------|----------|------|----------|----------|----------|----------|----------|-----|----------|----------|----------|----------|----------|-----|----------|----------|----------|----------|----------|-------|----------|----------|----------|----------|----------|--|---|---|---|---|----|------|----------|--|--|--|--|------|----------|----------|--|--|--|-----|----------|----------|----------|--|--|-----|----------|----------|----------|----------|--|-------|----------|----------|----------|----------|----------|
|                                                                                                                                | 1                                                                                                                                                                                                                                                                                                                                                                                                                                                                                                                                                                                                                                                                                                                                                                                                                                                                                                                                                                                                                                                                                                                                                                                                                                                                                                                                                                                                                                                                                                                                                                                                                                                                                                                                 | 2        | 3        | 4        | 5        |   |   |     |          |  |  |  |  |     |          |          |  |  |  |      |          |          |          |  |  |      |          |          |          |          |  |     |          |          |          |          |          |      |          |          |          |          |          |      |          |          |          |          |          |     |          |          |          |          |          |     |          |          |          |          |          |       |          |          |          |          |          |  |   |   |   |   |    |      |          |  |  |  |  |      |          |          |  |  |  |     |          |          |          |  |  |     |          |          |          |          |  |       |          |          |          |          |          |
| 1 B                                                                                                                            | 0.000000                                                                                                                                                                                                                                                                                                                                                                                                                                                                                                                                                                                                                                                                                                                                                                                                                                                                                                                                                                                                                                                                                                                                                                                                                                                                                                                                                                                                                                                                                                                                                                                                                                                                                                                          |          |          |          |          |   |   |     |          |  |  |  |  |     |          |          |  |  |  |      |          |          |          |  |  |      |          |          |          |          |  |     |          |          |          |          |          |      |          |          |          |          |          |      |          |          |          |          |          |     |          |          |          |          |          |     |          |          |          |          |          |       |          |          |          |          |          |  |   |   |   |   |    |      |          |  |  |  |  |      |          |          |  |  |  |     |          |          |          |  |  |     |          |          |          |          |  |       |          |          |          |          |          |
| 2 B                                                                                                                            | 1.735945                                                                                                                                                                                                                                                                                                                                                                                                                                                                                                                                                                                                                                                                                                                                                                                                                                                                                                                                                                                                                                                                                                                                                                                                                                                                                                                                                                                                                                                                                                                                                                                                                                                                                                                          | 0.000000 |          |          |          |   |   |     |          |  |  |  |  |     |          |          |  |  |  |      |          |          |          |  |  |      |          |          |          |          |  |     |          |          |          |          |          |      |          |          |          |          |          |      |          |          |          |          |          |     |          |          |          |          |          |     |          |          |          |          |          |       |          |          |          |          |          |  |   |   |   |   |    |      |          |  |  |  |  |      |          |          |  |  |  |     |          |          |          |  |  |     |          |          |          |          |  |       |          |          |          |          |          |
| 3 B                                                                                                                            | 1.947146                                                                                                                                                                                                                                                                                                                                                                                                                                                                                                                                                                                                                                                                                                                                                                                                                                                                                                                                                                                                                                                                                                                                                                                                                                                                                                                                                                                                                                                                                                                                                                                                                                                                                                                          | 2.756098 | 0.000000 |          |          |   |   |     |          |  |  |  |  |     |          |          |  |  |  |      |          |          |          |  |  |      |          |          |          |          |  |     |          |          |          |          |          |      |          |          |          |          |          |      |          |          |          |          |          |     |          |          |          |          |          |     |          |          |          |          |          |       |          |          |          |          |          |  |   |   |   |   |    |      |          |  |  |  |  |      |          |          |  |  |  |     |          |          |          |  |  |     |          |          |          |          |  |       |          |          |          |          |          |
| 4 Os                                                                                                                           | 2.330187                                                                                                                                                                                                                                                                                                                                                                                                                                                                                                                                                                                                                                                                                                                                                                                                                                                                                                                                                                                                                                                                                                                                                                                                                                                                                                                                                                                                                                                                                                                                                                                                                                                                                                                          | 2.263458 | 3.131773 | 0.000000 |          |   |   |     |          |  |  |  |  |     |          |          |  |  |  |      |          |          |          |  |  |      |          |          |          |          |  |     |          |          |          |          |          |      |          |          |          |          |          |      |          |          |          |          |          |     |          |          |          |          |          |     |          |          |          |          |          |       |          |          |          |          |          |  |   |   |   |   |    |      |          |  |  |  |  |      |          |          |  |  |  |     |          |          |          |  |  |     |          |          |          |          |  |       |          |          |          |          |          |
| 5 B                                                                                                                            | 2.756098                                                                                                                                                                                                                                                                                                                                                                                                                                                                                                                                                                                                                                                                                                                                                                                                                                                                                                                                                                                                                                                                                                                                                                                                                                                                                                                                                                                                                                                                                                                                                                                                                                                                                                                          | 3.026146 | 1.735945 | 2.378508 | 0.000000 |   |   |     |          |  |  |  |  |     |          |          |  |  |  |      |          |          |          |  |  |      |          |          |          |          |  |     |          |          |          |          |          |      |          |          |          |          |          |      |          |          |          |          |          |     |          |          |          |          |          |     |          |          |          |          |          |       |          |          |          |          |          |  |   |   |   |   |    |      |          |  |  |  |  |      |          |          |  |  |  |     |          |          |          |  |  |     |          |          |          |          |  |       |          |          |          |          |          |
| 6 B                                                                                                                            | 3.123437                                                                                                                                                                                                                                                                                                                                                                                                                                                                                                                                                                                                                                                                                                                                                                                                                                                                                                                                                                                                                                                                                                                                                                                                                                                                                                                                                                                                                                                                                                                                                                                                                                                                                                                          | 1.728666 | 3.496465 | 2.210348 | 2.881623 |   |   |     |          |  |  |  |  |     |          |          |  |  |  |      |          |          |          |  |  |      |          |          |          |          |  |     |          |          |          |          |          |      |          |          |          |          |          |      |          |          |          |          |          |     |          |          |          |          |          |     |          |          |          |          |          |       |          |          |          |          |          |  |   |   |   |   |    |      |          |  |  |  |  |      |          |          |  |  |  |     |          |          |          |  |  |     |          |          |          |          |  |       |          |          |          |          |          |
| 7 Os                                                                                                                           | 3.131773                                                                                                                                                                                                                                                                                                                                                                                                                                                                                                                                                                                                                                                                                                                                                                                                                                                                                                                                                                                                                                                                                                                                                                                                                                                                                                                                                                                                                                                                                                                                                                                                                                                                                                                          | 2.378508 | 2.330187 | 3.363257 | 2.263458 |   |   |     |          |  |  |  |  |     |          |          |  |  |  |      |          |          |          |  |  |      |          |          |          |          |  |     |          |          |          |          |          |      |          |          |          |          |          |      |          |          |          |          |          |     |          |          |          |          |          |     |          |          |          |          |          |       |          |          |          |          |          |  |   |   |   |   |    |      |          |  |  |  |  |      |          |          |  |  |  |     |          |          |          |  |  |     |          |          |          |          |  |       |          |          |          |          |          |
| 8 B                                                                                                                            | 1.785921                                                                                                                                                                                                                                                                                                                                                                                                                                                                                                                                                                                                                                                                                                                                                                                                                                                                                                                                                                                                                                                                                                                                                                                                                                                                                                                                                                                                                                                                                                                                                                                                                                                                                                                          | 2.958746 | 1.778757 | 2.081506 | 1.763407 |   |   |     |          |  |  |  |  |     |          |          |  |  |  |      |          |          |          |  |  |      |          |          |          |          |  |     |          |          |          |          |          |      |          |          |          |          |          |      |          |          |          |          |          |     |          |          |          |          |          |     |          |          |          |          |          |       |          |          |          |          |          |  |   |   |   |   |    |      |          |  |  |  |  |      |          |          |  |  |  |     |          |          |          |  |  |     |          |          |          |          |  |       |          |          |          |          |          |
| 9 B                                                                                                                            | 1.778757                                                                                                                                                                                                                                                                                                                                                                                                                                                                                                                                                                                                                                                                                                                                                                                                                                                                                                                                                                                                                                                                                                                                                                                                                                                                                                                                                                                                                                                                                                                                                                                                                                                                                                                          | 1.763407 | 1.785921 | 3.418193 | 2.958746 |   |   |     |          |  |  |  |  |     |          |          |  |  |  |      |          |          |          |  |  |      |          |          |          |          |  |     |          |          |          |          |          |      |          |          |          |          |          |      |          |          |          |          |          |     |          |          |          |          |          |     |          |          |          |          |          |       |          |          |          |          |          |  |   |   |   |   |    |      |          |  |  |  |  |      |          |          |  |  |  |     |          |          |          |  |  |     |          |          |          |          |  |       |          |          |          |          |          |
| 10 B                                                                                                                           | 3.496465                                                                                                                                                                                                                                                                                                                                                                                                                                                                                                                                                                                                                                                                                                                                                                                                                                                                                                                                                                                                                                                                                                                                                                                                                                                                                                                                                                                                                                                                                                                                                                                                                                                                                                                          | 2.881623 | 3.123437 | 2.161675 | 1.728666 |   |   |     |          |  |  |  |  |     |          |          |  |  |  |      |          |          |          |  |  |      |          |          |          |          |  |     |          |          |          |          |          |      |          |          |          |          |          |      |          |          |          |          |          |     |          |          |          |          |          |     |          |          |          |          |          |       |          |          |          |          |          |  |   |   |   |   |    |      |          |  |  |  |  |      |          |          |  |  |  |     |          |          |          |  |  |     |          |          |          |          |  |       |          |          |          |          |          |
|                                                                                                                                | 6                                                                                                                                                                                                                                                                                                                                                                                                                                                                                                                                                                                                                                                                                                                                                                                                                                                                                                                                                                                                                                                                                                                                                                                                                                                                                                                                                                                                                                                                                                                                                                                                                                                                                                                                 | 7        | 8        | 9        | 10       |   |   |     |          |  |  |  |  |     |          |          |  |  |  |      |          |          |          |  |  |      |          |          |          |          |  |     |          |          |          |          |          |      |          |          |          |          |          |      |          |          |          |          |          |     |          |          |          |          |          |     |          |          |          |          |          |       |          |          |          |          |          |  |   |   |   |   |    |      |          |  |  |  |  |      |          |          |  |  |  |     |          |          |          |  |  |     |          |          |          |          |  |       |          |          |          |          |          |
| 6 B                                                                                                                            | 0.000000                                                                                                                                                                                                                                                                                                                                                                                                                                                                                                                                                                                                                                                                                                                                                                                                                                                                                                                                                                                                                                                                                                                                                                                                                                                                                                                                                                                                                                                                                                                                                                                                                                                                                                                          |          |          |          |          |   |   |     |          |  |  |  |  |     |          |          |  |  |  |      |          |          |          |  |  |      |          |          |          |          |  |     |          |          |          |          |          |      |          |          |          |          |          |      |          |          |          |          |          |     |          |          |          |          |          |     |          |          |          |          |          |       |          |          |          |          |          |  |   |   |   |   |    |      |          |  |  |  |  |      |          |          |  |  |  |     |          |          |          |  |  |     |          |          |          |          |  |       |          |          |          |          |          |
| 7 Os                                                                                                                           | 2.161675                                                                                                                                                                                                                                                                                                                                                                                                                                                                                                                                                                                                                                                                                                                                                                                                                                                                                                                                                                                                                                                                                                                                                                                                                                                                                                                                                                                                                                                                                                                                                                                                                                                                                                                          | 0.000000 |          |          |          |   |   |     |          |  |  |  |  |     |          |          |  |  |  |      |          |          |          |  |  |      |          |          |          |          |  |     |          |          |          |          |          |      |          |          |          |          |          |      |          |          |          |          |          |     |          |          |          |          |          |     |          |          |          |          |          |       |          |          |          |          |          |  |   |   |   |   |    |      |          |  |  |  |  |      |          |          |  |  |  |     |          |          |          |  |  |     |          |          |          |          |  |       |          |          |          |          |          |
| 8 B                                                                                                                            | 3.564185                                                                                                                                                                                                                                                                                                                                                                                                                                                                                                                                                                                                                                                                                                                                                                                                                                                                                                                                                                                                                                                                                                                                                                                                                                                                                                                                                                                                                                                                                                                                                                                                                                                                                                                          | 3.418193 | 0.000000 |          |          |   |   |     |          |  |  |  |  |     |          |          |  |  |  |      |          |          |          |  |  |      |          |          |          |          |  |     |          |          |          |          |          |      |          |          |          |          |          |      |          |          |          |          |          |     |          |          |          |          |          |     |          |          |          |          |          |       |          |          |          |          |          |  |   |   |   |   |    |      |          |  |  |  |  |      |          |          |  |  |  |     |          |          |          |  |  |     |          |          |          |          |  |       |          |          |          |          |          |
| 9 B                                                                                                                            | 3.011826                                                                                                                                                                                                                                                                                                                                                                                                                                                                                                                                                                                                                                                                                                                                                                                                                                                                                                                                                                                                                                                                                                                                                                                                                                                                                                                                                                                                                                                                                                                                                                                                                                                                                                                          | 2.081506 | 2.951062 | 0.000000 |          |   |   |     |          |  |  |  |  |     |          |          |  |  |  |      |          |          |          |  |  |      |          |          |          |          |  |     |          |          |          |          |          |      |          |          |          |          |          |      |          |          |          |          |          |     |          |          |          |          |          |     |          |          |          |          |          |       |          |          |          |          |          |  |   |   |   |   |    |      |          |  |  |  |  |      |          |          |  |  |  |     |          |          |          |  |  |     |          |          |          |          |  |       |          |          |          |          |          |
| 10 B                                                                                                                           | 1.763397                                                                                                                                                                                                                                                                                                                                                                                                                                                                                                                                                                                                                                                                                                                                                                                                                                                                                                                                                                                                                                                                                                                                                                                                                                                                                                                                                                                                                                                                                                                                                                                                                                                                                                                          | 2.210348 | 3.011826 | 3.564185 | 0.000000 |   |   |     |          |  |  |  |  |     |          |          |  |  |  |      |          |          |          |  |  |      |          |          |          |          |  |     |          |          |          |          |          |      |          |          |          |          |          |      |          |          |          |          |          |     |          |          |          |          |          |     |          |          |          |          |          |       |          |          |          |          |          |  |   |   |   |   |    |      |          |  |  |  |  |      |          |          |  |  |  |     |          |          |          |  |  |     |          |          |          |          |  |       |          |          |          |          |          |
|  <p>5. -772.29041583 +18.9 C<sub>2</sub></p> | <table border="1"> <thead> <tr> <th></th> <th>1</th> <th>2</th> <th>3</th> <th>4</th> <th>5</th> </tr> </thead> <tbody> <tr><td>1 B</td><td>0.000000</td><td></td><td></td><td></td><td></td></tr> <tr><td>2 B</td><td>1.875625</td><td>0.000000</td><td></td><td></td><td></td></tr> <tr><td>3 Os</td><td>2.969837</td><td>2.279873</td><td>0.000000</td><td></td><td></td></tr> <tr><td>4 B</td><td>1.838632</td><td>2.814607</td><td>2.252163</td><td>0.000000</td><td></td></tr> <tr><td>5 B</td><td>2.998230</td><td>1.758700</td><td>2.310358</td><td>3.520066</td><td>0.000000</td></tr> <tr><td>6 B</td><td>3.520005</td><td>3.040351</td><td>2.064113</td><td>3.166094</td><td>1.838596</td></tr> <tr><td>7 Os</td><td>2.310297</td><td>3.174400</td><td>2.928161</td><td>2.064175</td><td>2.969881</td></tr> <tr><td>8 B</td><td>1.758605</td><td>1.759581</td><td>3.174400</td><td>3.040372</td><td>1.875681</td></tr> <tr><td>9 B</td><td>3.156461</td><td>2.934373</td><td>3.264281</td><td>3.646146</td><td>1.763578</td></tr> <tr><td>10 B</td><td>1.763599</td><td>1.766563</td><td>2.097625</td><td>1.766739</td><td>3.156559</td></tr> <tr> <td></td> <td>6</td> <td>7</td> <td>8</td> <td>9</td> <td>10</td> </tr> <tr><td>6 B</td><td>0.000000</td><td></td><td></td><td></td><td></td></tr> <tr><td>7 Os</td><td>2.252236</td><td>0.000000</td><td></td><td></td><td></td></tr> <tr><td>8 B</td><td>2.814643</td><td>2.279873</td><td>0.000000</td><td></td><td></td></tr> <tr><td>9 B</td><td>1.766808</td><td>2.097625</td><td>1.766563</td><td>0.000000</td><td></td></tr> <tr><td>10 B</td><td>3.646123</td><td>3.264281</td><td>2.934373</td><td>4.026639</td><td>0.000000</td></tr> </tbody> </table>  |          | 1        | 2        | 3        | 4 | 5 | 1 B | 0.000000 |  |  |  |  | 2 B | 1.875625 | 0.000000 |  |  |  | 3 Os | 2.969837 | 2.279873 | 0.000000 |  |  | 4 B  | 1.838632 | 2.814607 | 2.252163 | 0.000000 |  | 5 B | 2.998230 | 1.758700 | 2.310358 | 3.520066 | 0.000000 | 6 B  | 3.520005 | 3.040351 | 2.064113 | 3.166094 | 1.838596 | 7 Os | 2.310297 | 3.174400 | 2.928161 | 2.064175 | 2.969881 | 8 B | 1.758605 | 1.759581 | 3.174400 | 3.040372 | 1.875681 | 9 B | 3.156461 | 2.934373 | 3.264281 | 3.646146 | 1.763578 | 10 B  | 1.763599 | 1.766563 | 2.097625 | 1.766739 | 3.156559 |  | 6 | 7 | 8 | 9 | 10 | 6 B  | 0.000000 |  |  |  |  | 7 Os | 2.252236 | 0.000000 |  |  |  | 8 B | 2.814643 | 2.279873 | 0.000000 |  |  | 9 B | 1.766808 | 2.097625 | 1.766563 | 0.000000 |  | 10 B  | 3.646123 | 3.264281 | 2.934373 | 4.026639 | 0.000000 |
|                                                                                                                                | 1                                                                                                                                                                                                                                                                                                                                                                                                                                                                                                                                                                                                                                                                                                                                                                                                                                                                                                                                                                                                                                                                                                                                                                                                                                                                                                                                                                                                                                                                                                                                                                                                                                                                                                                                 | 2        | 3        | 4        | 5        |   |   |     |          |  |  |  |  |     |          |          |  |  |  |      |          |          |          |  |  |      |          |          |          |          |  |     |          |          |          |          |          |      |          |          |          |          |          |      |          |          |          |          |          |     |          |          |          |          |          |     |          |          |          |          |          |       |          |          |          |          |          |  |   |   |   |   |    |      |          |  |  |  |  |      |          |          |  |  |  |     |          |          |          |  |  |     |          |          |          |          |  |       |          |          |          |          |          |
| 1 B                                                                                                                            | 0.000000                                                                                                                                                                                                                                                                                                                                                                                                                                                                                                                                                                                                                                                                                                                                                                                                                                                                                                                                                                                                                                                                                                                                                                                                                                                                                                                                                                                                                                                                                                                                                                                                                                                                                                                          |          |          |          |          |   |   |     |          |  |  |  |  |     |          |          |  |  |  |      |          |          |          |  |  |      |          |          |          |          |  |     |          |          |          |          |          |      |          |          |          |          |          |      |          |          |          |          |          |     |          |          |          |          |          |     |          |          |          |          |          |       |          |          |          |          |          |  |   |   |   |   |    |      |          |  |  |  |  |      |          |          |  |  |  |     |          |          |          |  |  |     |          |          |          |          |  |       |          |          |          |          |          |
| 2 B                                                                                                                            | 1.875625                                                                                                                                                                                                                                                                                                                                                                                                                                                                                                                                                                                                                                                                                                                                                                                                                                                                                                                                                                                                                                                                                                                                                                                                                                                                                                                                                                                                                                                                                                                                                                                                                                                                                                                          | 0.000000 |          |          |          |   |   |     |          |  |  |  |  |     |          |          |  |  |  |      |          |          |          |  |  |      |          |          |          |          |  |     |          |          |          |          |          |      |          |          |          |          |          |      |          |          |          |          |          |     |          |          |          |          |          |     |          |          |          |          |          |       |          |          |          |          |          |  |   |   |   |   |    |      |          |  |  |  |  |      |          |          |  |  |  |     |          |          |          |  |  |     |          |          |          |          |  |       |          |          |          |          |          |
| 3 Os                                                                                                                           | 2.969837                                                                                                                                                                                                                                                                                                                                                                                                                                                                                                                                                                                                                                                                                                                                                                                                                                                                                                                                                                                                                                                                                                                                                                                                                                                                                                                                                                                                                                                                                                                                                                                                                                                                                                                          | 2.279873 | 0.000000 |          |          |   |   |     |          |  |  |  |  |     |          |          |  |  |  |      |          |          |          |  |  |      |          |          |          |          |  |     |          |          |          |          |          |      |          |          |          |          |          |      |          |          |          |          |          |     |          |          |          |          |          |     |          |          |          |          |          |       |          |          |          |          |          |  |   |   |   |   |    |      |          |  |  |  |  |      |          |          |  |  |  |     |          |          |          |  |  |     |          |          |          |          |  |       |          |          |          |          |          |
| 4 B                                                                                                                            | 1.838632                                                                                                                                                                                                                                                                                                                                                                                                                                                                                                                                                                                                                                                                                                                                                                                                                                                                                                                                                                                                                                                                                                                                                                                                                                                                                                                                                                                                                                                                                                                                                                                                                                                                                                                          | 2.814607 | 2.252163 | 0.000000 |          |   |   |     |          |  |  |  |  |     |          |          |  |  |  |      |          |          |          |  |  |      |          |          |          |          |  |     |          |          |          |          |          |      |          |          |          |          |          |      |          |          |          |          |          |     |          |          |          |          |          |     |          |          |          |          |          |       |          |          |          |          |          |  |   |   |   |   |    |      |          |  |  |  |  |      |          |          |  |  |  |     |          |          |          |  |  |     |          |          |          |          |  |       |          |          |          |          |          |
| 5 B                                                                                                                            | 2.998230                                                                                                                                                                                                                                                                                                                                                                                                                                                                                                                                                                                                                                                                                                                                                                                                                                                                                                                                                                                                                                                                                                                                                                                                                                                                                                                                                                                                                                                                                                                                                                                                                                                                                                                          | 1.758700 | 2.310358 | 3.520066 | 0.000000 |   |   |     |          |  |  |  |  |     |          |          |  |  |  |      |          |          |          |  |  |      |          |          |          |          |  |     |          |          |          |          |          |      |          |          |          |          |          |      |          |          |          |          |          |     |          |          |          |          |          |     |          |          |          |          |          |       |          |          |          |          |          |  |   |   |   |   |    |      |          |  |  |  |  |      |          |          |  |  |  |     |          |          |          |  |  |     |          |          |          |          |  |       |          |          |          |          |          |
| 6 B                                                                                                                            | 3.520005                                                                                                                                                                                                                                                                                                                                                                                                                                                                                                                                                                                                                                                                                                                                                                                                                                                                                                                                                                                                                                                                                                                                                                                                                                                                                                                                                                                                                                                                                                                                                                                                                                                                                                                          | 3.040351 | 2.064113 | 3.166094 | 1.838596 |   |   |     |          |  |  |  |  |     |          |          |  |  |  |      |          |          |          |  |  |      |          |          |          |          |  |     |          |          |          |          |          |      |          |          |          |          |          |      |          |          |          |          |          |     |          |          |          |          |          |     |          |          |          |          |          |       |          |          |          |          |          |  |   |   |   |   |    |      |          |  |  |  |  |      |          |          |  |  |  |     |          |          |          |  |  |     |          |          |          |          |  |       |          |          |          |          |          |
| 7 Os                                                                                                                           | 2.310297                                                                                                                                                                                                                                                                                                                                                                                                                                                                                                                                                                                                                                                                                                                                                                                                                                                                                                                                                                                                                                                                                                                                                                                                                                                                                                                                                                                                                                                                                                                                                                                                                                                                                                                          | 3.174400 | 2.928161 | 2.064175 | 2.969881 |   |   |     |          |  |  |  |  |     |          |          |  |  |  |      |          |          |          |  |  |      |          |          |          |          |  |     |          |          |          |          |          |      |          |          |          |          |          |      |          |          |          |          |          |     |          |          |          |          |          |     |          |          |          |          |          |       |          |          |          |          |          |  |   |   |   |   |    |      |          |  |  |  |  |      |          |          |  |  |  |     |          |          |          |  |  |     |          |          |          |          |  |       |          |          |          |          |          |
| 8 B                                                                                                                            | 1.758605                                                                                                                                                                                                                                                                                                                                                                                                                                                                                                                                                                                                                                                                                                                                                                                                                                                                                                                                                                                                                                                                                                                                                                                                                                                                                                                                                                                                                                                                                                                                                                                                                                                                                                                          | 1.759581 | 3.174400 | 3.040372 | 1.875681 |   |   |     |          |  |  |  |  |     |          |          |  |  |  |      |          |          |          |  |  |      |          |          |          |          |  |     |          |          |          |          |          |      |          |          |          |          |          |      |          |          |          |          |          |     |          |          |          |          |          |     |          |          |          |          |          |       |          |          |          |          |          |  |   |   |   |   |    |      |          |  |  |  |  |      |          |          |  |  |  |     |          |          |          |  |  |     |          |          |          |          |  |       |          |          |          |          |          |
| 9 B                                                                                                                            | 3.156461                                                                                                                                                                                                                                                                                                                                                                                                                                                                                                                                                                                                                                                                                                                                                                                                                                                                                                                                                                                                                                                                                                                                                                                                                                                                                                                                                                                                                                                                                                                                                                                                                                                                                                                          | 2.934373 | 3.264281 | 3.646146 | 1.763578 |   |   |     |          |  |  |  |  |     |          |          |  |  |  |      |          |          |          |  |  |      |          |          |          |          |  |     |          |          |          |          |          |      |          |          |          |          |          |      |          |          |          |          |          |     |          |          |          |          |          |     |          |          |          |          |          |       |          |          |          |          |          |  |   |   |   |   |    |      |          |  |  |  |  |      |          |          |  |  |  |     |          |          |          |  |  |     |          |          |          |          |  |       |          |          |          |          |          |
| 10 B                                                                                                                           | 1.763599                                                                                                                                                                                                                                                                                                                                                                                                                                                                                                                                                                                                                                                                                                                                                                                                                                                                                                                                                                                                                                                                                                                                                                                                                                                                                                                                                                                                                                                                                                                                                                                                                                                                                                                          | 1.766563 | 2.097625 | 1.766739 | 3.156559 |   |   |     |          |  |  |  |  |     |          |          |  |  |  |      |          |          |          |  |  |      |          |          |          |          |  |     |          |          |          |          |          |      |          |          |          |          |          |      |          |          |          |          |          |     |          |          |          |          |          |     |          |          |          |          |          |       |          |          |          |          |          |  |   |   |   |   |    |      |          |  |  |  |  |      |          |          |  |  |  |     |          |          |          |  |  |     |          |          |          |          |  |       |          |          |          |          |          |
|                                                                                                                                | 6                                                                                                                                                                                                                                                                                                                                                                                                                                                                                                                                                                                                                                                                                                                                                                                                                                                                                                                                                                                                                                                                                                                                                                                                                                                                                                                                                                                                                                                                                                                                                                                                                                                                                                                                 | 7        | 8        | 9        | 10       |   |   |     |          |  |  |  |  |     |          |          |  |  |  |      |          |          |          |  |  |      |          |          |          |          |  |     |          |          |          |          |          |      |          |          |          |          |          |      |          |          |          |          |          |     |          |          |          |          |          |     |          |          |          |          |          |       |          |          |          |          |          |  |   |   |   |   |    |      |          |  |  |  |  |      |          |          |  |  |  |     |          |          |          |  |  |     |          |          |          |          |  |       |          |          |          |          |          |
| 6 B                                                                                                                            | 0.000000                                                                                                                                                                                                                                                                                                                                                                                                                                                                                                                                                                                                                                                                                                                                                                                                                                                                                                                                                                                                                                                                                                                                                                                                                                                                                                                                                                                                                                                                                                                                                                                                                                                                                                                          |          |          |          |          |   |   |     |          |  |  |  |  |     |          |          |  |  |  |      |          |          |          |  |  |      |          |          |          |          |  |     |          |          |          |          |          |      |          |          |          |          |          |      |          |          |          |          |          |     |          |          |          |          |          |     |          |          |          |          |          |       |          |          |          |          |          |  |   |   |   |   |    |      |          |  |  |  |  |      |          |          |  |  |  |     |          |          |          |  |  |     |          |          |          |          |  |       |          |          |          |          |          |
| 7 Os                                                                                                                           | 2.252236                                                                                                                                                                                                                                                                                                                                                                                                                                                                                                                                                                                                                                                                                                                                                                                                                                                                                                                                                                                                                                                                                                                                                                                                                                                                                                                                                                                                                                                                                                                                                                                                                                                                                                                          | 0.000000 |          |          |          |   |   |     |          |  |  |  |  |     |          |          |  |  |  |      |          |          |          |  |  |      |          |          |          |          |  |     |          |          |          |          |          |      |          |          |          |          |          |      |          |          |          |          |          |     |          |          |          |          |          |     |          |          |          |          |          |       |          |          |          |          |          |  |   |   |   |   |    |      |          |  |  |  |  |      |          |          |  |  |  |     |          |          |          |  |  |     |          |          |          |          |  |       |          |          |          |          |          |
| 8 B                                                                                                                            | 2.814643                                                                                                                                                                                                                                                                                                                                                                                                                                                                                                                                                                                                                                                                                                                                                                                                                                                                                                                                                                                                                                                                                                                                                                                                                                                                                                                                                                                                                                                                                                                                                                                                                                                                                                                          | 2.279873 | 0.000000 |          |          |   |   |     |          |  |  |  |  |     |          |          |  |  |  |      |          |          |          |  |  |      |          |          |          |          |  |     |          |          |          |          |          |      |          |          |          |          |          |      |          |          |          |          |          |     |          |          |          |          |          |     |          |          |          |          |          |       |          |          |          |          |          |  |   |   |   |   |    |      |          |  |  |  |  |      |          |          |  |  |  |     |          |          |          |  |  |     |          |          |          |          |  |       |          |          |          |          |          |
| 9 B                                                                                                                            | 1.766808                                                                                                                                                                                                                                                                                                                                                                                                                                                                                                                                                                                                                                                                                                                                                                                                                                                                                                                                                                                                                                                                                                                                                                                                                                                                                                                                                                                                                                                                                                                                                                                                                                                                                                                          | 2.097625 | 1.766563 | 0.000000 |          |   |   |     |          |  |  |  |  |     |          |          |  |  |  |      |          |          |          |  |  |      |          |          |          |          |  |     |          |          |          |          |          |      |          |          |          |          |          |      |          |          |          |          |          |     |          |          |          |          |          |     |          |          |          |          |          |       |          |          |          |          |          |  |   |   |   |   |    |      |          |  |  |  |  |      |          |          |  |  |  |     |          |          |          |  |  |     |          |          |          |          |  |       |          |          |          |          |          |
| 10 B                                                                                                                           | 3.646123                                                                                                                                                                                                                                                                                                                                                                                                                                                                                                                                                                                                                                                                                                                                                                                                                                                                                                                                                                                                                                                                                                                                                                                                                                                                                                                                                                                                                                                                                                                                                                                                                                                                                                                          | 3.264281 | 2.934373 | 4.026639 | 0.000000 |   |   |     |          |  |  |  |  |     |          |          |  |  |  |      |          |          |          |  |  |      |          |          |          |          |  |     |          |          |          |          |          |      |          |          |          |          |          |      |          |          |          |          |          |     |          |          |          |          |          |     |          |          |          |          |          |       |          |          |          |          |          |  |   |   |   |   |    |      |          |  |  |  |  |      |          |          |  |  |  |     |          |          |          |  |  |     |          |          |          |          |  |       |          |          |          |          |          |
|  <p>6. -772.28157680 +24.4</p>              | <table border="1"> <thead> <tr> <th></th> <th>1</th> <th>2</th> <th>3</th> <th>4</th> <th>5</th> </tr> </thead> <tbody> <tr><td>1 B</td><td>0.000000</td><td></td><td></td><td></td><td></td></tr> <tr><td>2 B</td><td>3.353043</td><td>0.000000</td><td></td><td></td><td></td></tr> <tr><td>3 B</td><td>3.176287</td><td>3.097831</td><td>0.000000</td><td></td><td></td></tr> <tr><td>4 B</td><td>1.738928</td><td>3.388353</td><td>1.742714</td><td>0.000000</td><td></td></tr> <tr><td>5 B</td><td>2.043384</td><td>1.674789</td><td>3.318511</td><td>2.689292</td><td>0.000000</td></tr> <tr><td>6 Os</td><td>3.185274</td><td>2.249908</td><td>2.156013</td><td>2.322014</td><td>2.301587</td></tr> <tr><td>7 B</td><td>1.856241</td><td>3.709321</td><td>3.199620</td><td>1.737040</td><td>2.453194</td></tr> <tr><td>8 B</td><td>1.716635</td><td>3.409702</td><td>4.213165</td><td>2.873074</td><td>1.744524</td></tr> <tr><td>9 B</td><td>2.749969</td><td>2.953551</td><td>3.900432</td><td>3.005552</td><td>1.790246</td></tr> <tr><td>10 Os</td><td>2.331397</td><td>2.119671</td><td>2.052330</td><td>2.220755</td><td>2.248621</td></tr> <tr> <td></td> <td>6</td> <td>7</td> <td>8</td> <td>9</td> <td>10</td> </tr> <tr><td>6 Os</td><td>0.000000</td><td></td><td></td><td></td><td></td></tr> <tr><td>7 B</td><td>2.441286</td><td>0.000000</td><td></td><td></td><td></td></tr> <tr><td>8 B</td><td>3.232696</td><td>1.777021</td><td>0.000000</td><td></td><td></td></tr> <tr><td>9 B</td><td>2.192197</td><td>1.791777</td><td>1.631389</td><td>0.000000</td><td></td></tr> <tr><td>10 Os</td><td>2.784506</td><td>3.371845</td><td>3.445894</td><td>3.682488</td><td>0.000000</td></tr> </tbody> </table> |          | 1        | 2        | 3        | 4 | 5 | 1 B | 0.000000 |  |  |  |  | 2 B | 3.353043 | 0.000000 |  |  |  | 3 B  | 3.176287 | 3.097831 | 0.000000 |  |  | 4 B  | 1.738928 | 3.388353 | 1.742714 | 0.000000 |  | 5 B | 2.043384 | 1.674789 | 3.318511 | 2.689292 | 0.000000 | 6 Os | 3.185274 | 2.249908 | 2.156013 | 2.322014 | 2.301587 | 7 B  | 1.856241 | 3.709321 | 3.199620 | 1.737040 | 2.453194 | 8 B | 1.716635 | 3.409702 | 4.213165 | 2.873074 | 1.744524 | 9 B | 2.749969 | 2.953551 | 3.900432 | 3.005552 | 1.790246 | 10 Os | 2.331397 | 2.119671 | 2.052330 | 2.220755 | 2.248621 |  | 6 | 7 | 8 | 9 | 10 | 6 Os | 0.000000 |  |  |  |  | 7 B  | 2.441286 | 0.000000 |  |  |  | 8 B | 3.232696 | 1.777021 | 0.000000 |  |  | 9 B | 2.192197 | 1.791777 | 1.631389 | 0.000000 |  | 10 Os | 2.784506 | 3.371845 | 3.445894 | 3.682488 | 0.000000 |
|                                                                                                                                | 1                                                                                                                                                                                                                                                                                                                                                                                                                                                                                                                                                                                                                                                                                                                                                                                                                                                                                                                                                                                                                                                                                                                                                                                                                                                                                                                                                                                                                                                                                                                                                                                                                                                                                                                                 | 2        | 3        | 4        | 5        |   |   |     |          |  |  |  |  |     |          |          |  |  |  |      |          |          |          |  |  |      |          |          |          |          |  |     |          |          |          |          |          |      |          |          |          |          |          |      |          |          |          |          |          |     |          |          |          |          |          |     |          |          |          |          |          |       |          |          |          |          |          |  |   |   |   |   |    |      |          |  |  |  |  |      |          |          |  |  |  |     |          |          |          |  |  |     |          |          |          |          |  |       |          |          |          |          |          |
| 1 B                                                                                                                            | 0.000000                                                                                                                                                                                                                                                                                                                                                                                                                                                                                                                                                                                                                                                                                                                                                                                                                                                                                                                                                                                                                                                                                                                                                                                                                                                                                                                                                                                                                                                                                                                                                                                                                                                                                                                          |          |          |          |          |   |   |     |          |  |  |  |  |     |          |          |  |  |  |      |          |          |          |  |  |      |          |          |          |          |  |     |          |          |          |          |          |      |          |          |          |          |          |      |          |          |          |          |          |     |          |          |          |          |          |     |          |          |          |          |          |       |          |          |          |          |          |  |   |   |   |   |    |      |          |  |  |  |  |      |          |          |  |  |  |     |          |          |          |  |  |     |          |          |          |          |  |       |          |          |          |          |          |
| 2 B                                                                                                                            | 3.353043                                                                                                                                                                                                                                                                                                                                                                                                                                                                                                                                                                                                                                                                                                                                                                                                                                                                                                                                                                                                                                                                                                                                                                                                                                                                                                                                                                                                                                                                                                                                                                                                                                                                                                                          | 0.000000 |          |          |          |   |   |     |          |  |  |  |  |     |          |          |  |  |  |      |          |          |          |  |  |      |          |          |          |          |  |     |          |          |          |          |          |      |          |          |          |          |          |      |          |          |          |          |          |     |          |          |          |          |          |     |          |          |          |          |          |       |          |          |          |          |          |  |   |   |   |   |    |      |          |  |  |  |  |      |          |          |  |  |  |     |          |          |          |  |  |     |          |          |          |          |  |       |          |          |          |          |          |
| 3 B                                                                                                                            | 3.176287                                                                                                                                                                                                                                                                                                                                                                                                                                                                                                                                                                                                                                                                                                                                                                                                                                                                                                                                                                                                                                                                                                                                                                                                                                                                                                                                                                                                                                                                                                                                                                                                                                                                                                                          | 3.097831 | 0.000000 |          |          |   |   |     |          |  |  |  |  |     |          |          |  |  |  |      |          |          |          |  |  |      |          |          |          |          |  |     |          |          |          |          |          |      |          |          |          |          |          |      |          |          |          |          |          |     |          |          |          |          |          |     |          |          |          |          |          |       |          |          |          |          |          |  |   |   |   |   |    |      |          |  |  |  |  |      |          |          |  |  |  |     |          |          |          |  |  |     |          |          |          |          |  |       |          |          |          |          |          |
| 4 B                                                                                                                            | 1.738928                                                                                                                                                                                                                                                                                                                                                                                                                                                                                                                                                                                                                                                                                                                                                                                                                                                                                                                                                                                                                                                                                                                                                                                                                                                                                                                                                                                                                                                                                                                                                                                                                                                                                                                          | 3.388353 | 1.742714 | 0.000000 |          |   |   |     |          |  |  |  |  |     |          |          |  |  |  |      |          |          |          |  |  |      |          |          |          |          |  |     |          |          |          |          |          |      |          |          |          |          |          |      |          |          |          |          |          |     |          |          |          |          |          |     |          |          |          |          |          |       |          |          |          |          |          |  |   |   |   |   |    |      |          |  |  |  |  |      |          |          |  |  |  |     |          |          |          |  |  |     |          |          |          |          |  |       |          |          |          |          |          |
| 5 B                                                                                                                            | 2.043384                                                                                                                                                                                                                                                                                                                                                                                                                                                                                                                                                                                                                                                                                                                                                                                                                                                                                                                                                                                                                                                                                                                                                                                                                                                                                                                                                                                                                                                                                                                                                                                                                                                                                                                          | 1.674789 | 3.318511 | 2.689292 | 0.000000 |   |   |     |          |  |  |  |  |     |          |          |  |  |  |      |          |          |          |  |  |      |          |          |          |          |  |     |          |          |          |          |          |      |          |          |          |          |          |      |          |          |          |          |          |     |          |          |          |          |          |     |          |          |          |          |          |       |          |          |          |          |          |  |   |   |   |   |    |      |          |  |  |  |  |      |          |          |  |  |  |     |          |          |          |  |  |     |          |          |          |          |  |       |          |          |          |          |          |
| 6 Os                                                                                                                           | 3.185274                                                                                                                                                                                                                                                                                                                                                                                                                                                                                                                                                                                                                                                                                                                                                                                                                                                                                                                                                                                                                                                                                                                                                                                                                                                                                                                                                                                                                                                                                                                                                                                                                                                                                                                          | 2.249908 | 2.156013 | 2.322014 | 2.301587 |   |   |     |          |  |  |  |  |     |          |          |  |  |  |      |          |          |          |  |  |      |          |          |          |          |  |     |          |          |          |          |          |      |          |          |          |          |          |      |          |          |          |          |          |     |          |          |          |          |          |     |          |          |          |          |          |       |          |          |          |          |          |  |   |   |   |   |    |      |          |  |  |  |  |      |          |          |  |  |  |     |          |          |          |  |  |     |          |          |          |          |  |       |          |          |          |          |          |
| 7 B                                                                                                                            | 1.856241                                                                                                                                                                                                                                                                                                                                                                                                                                                                                                                                                                                                                                                                                                                                                                                                                                                                                                                                                                                                                                                                                                                                                                                                                                                                                                                                                                                                                                                                                                                                                                                                                                                                                                                          | 3.709321 | 3.199620 | 1.737040 | 2.453194 |   |   |     |          |  |  |  |  |     |          |          |  |  |  |      |          |          |          |  |  |      |          |          |          |          |  |     |          |          |          |          |          |      |          |          |          |          |          |      |          |          |          |          |          |     |          |          |          |          |          |     |          |          |          |          |          |       |          |          |          |          |          |  |   |   |   |   |    |      |          |  |  |  |  |      |          |          |  |  |  |     |          |          |          |  |  |     |          |          |          |          |  |       |          |          |          |          |          |
| 8 B                                                                                                                            | 1.716635                                                                                                                                                                                                                                                                                                                                                                                                                                                                                                                                                                                                                                                                                                                                                                                                                                                                                                                                                                                                                                                                                                                                                                                                                                                                                                                                                                                                                                                                                                                                                                                                                                                                                                                          | 3.409702 | 4.213165 | 2.873074 | 1.744524 |   |   |     |          |  |  |  |  |     |          |          |  |  |  |      |          |          |          |  |  |      |          |          |          |          |  |     |          |          |          |          |          |      |          |          |          |          |          |      |          |          |          |          |          |     |          |          |          |          |          |     |          |          |          |          |          |       |          |          |          |          |          |  |   |   |   |   |    |      |          |  |  |  |  |      |          |          |  |  |  |     |          |          |          |  |  |     |          |          |          |          |  |       |          |          |          |          |          |
| 9 B                                                                                                                            | 2.749969                                                                                                                                                                                                                                                                                                                                                                                                                                                                                                                                                                                                                                                                                                                                                                                                                                                                                                                                                                                                                                                                                                                                                                                                                                                                                                                                                                                                                                                                                                                                                                                                                                                                                                                          | 2.953551 | 3.900432 | 3.005552 | 1.790246 |   |   |     |          |  |  |  |  |     |          |          |  |  |  |      |          |          |          |  |  |      |          |          |          |          |  |     |          |          |          |          |          |      |          |          |          |          |          |      |          |          |          |          |          |     |          |          |          |          |          |     |          |          |          |          |          |       |          |          |          |          |          |  |   |   |   |   |    |      |          |  |  |  |  |      |          |          |  |  |  |     |          |          |          |  |  |     |          |          |          |          |  |       |          |          |          |          |          |
| 10 Os                                                                                                                          | 2.331397                                                                                                                                                                                                                                                                                                                                                                                                                                                                                                                                                                                                                                                                                                                                                                                                                                                                                                                                                                                                                                                                                                                                                                                                                                                                                                                                                                                                                                                                                                                                                                                                                                                                                                                          | 2.119671 | 2.052330 | 2.220755 | 2.248621 |   |   |     |          |  |  |  |  |     |          |          |  |  |  |      |          |          |          |  |  |      |          |          |          |          |  |     |          |          |          |          |          |      |          |          |          |          |          |      |          |          |          |          |          |     |          |          |          |          |          |     |          |          |          |          |          |       |          |          |          |          |          |  |   |   |   |   |    |      |          |  |  |  |  |      |          |          |  |  |  |     |          |          |          |  |  |     |          |          |          |          |  |       |          |          |          |          |          |
|                                                                                                                                | 6                                                                                                                                                                                                                                                                                                                                                                                                                                                                                                                                                                                                                                                                                                                                                                                                                                                                                                                                                                                                                                                                                                                                                                                                                                                                                                                                                                                                                                                                                                                                                                                                                                                                                                                                 | 7        | 8        | 9        | 10       |   |   |     |          |  |  |  |  |     |          |          |  |  |  |      |          |          |          |  |  |      |          |          |          |          |  |     |          |          |          |          |          |      |          |          |          |          |          |      |          |          |          |          |          |     |          |          |          |          |          |     |          |          |          |          |          |       |          |          |          |          |          |  |   |   |   |   |    |      |          |  |  |  |  |      |          |          |  |  |  |     |          |          |          |  |  |     |          |          |          |          |  |       |          |          |          |          |          |
| 6 Os                                                                                                                           | 0.000000                                                                                                                                                                                                                                                                                                                                                                                                                                                                                                                                                                                                                                                                                                                                                                                                                                                                                                                                                                                                                                                                                                                                                                                                                                                                                                                                                                                                                                                                                                                                                                                                                                                                                                                          |          |          |          |          |   |   |     |          |  |  |  |  |     |          |          |  |  |  |      |          |          |          |  |  |      |          |          |          |          |  |     |          |          |          |          |          |      |          |          |          |          |          |      |          |          |          |          |          |     |          |          |          |          |          |     |          |          |          |          |          |       |          |          |          |          |          |  |   |   |   |   |    |      |          |  |  |  |  |      |          |          |  |  |  |     |          |          |          |  |  |     |          |          |          |          |  |       |          |          |          |          |          |
| 7 B                                                                                                                            | 2.441286                                                                                                                                                                                                                                                                                                                                                                                                                                                                                                                                                                                                                                                                                                                                                                                                                                                                                                                                                                                                                                                                                                                                                                                                                                                                                                                                                                                                                                                                                                                                                                                                                                                                                                                          | 0.000000 |          |          |          |   |   |     |          |  |  |  |  |     |          |          |  |  |  |      |          |          |          |  |  |      |          |          |          |          |  |     |          |          |          |          |          |      |          |          |          |          |          |      |          |          |          |          |          |     |          |          |          |          |          |     |          |          |          |          |          |       |          |          |          |          |          |  |   |   |   |   |    |      |          |  |  |  |  |      |          |          |  |  |  |     |          |          |          |  |  |     |          |          |          |          |  |       |          |          |          |          |          |
| 8 B                                                                                                                            | 3.232696                                                                                                                                                                                                                                                                                                                                                                                                                                                                                                                                                                                                                                                                                                                                                                                                                                                                                                                                                                                                                                                                                                                                                                                                                                                                                                                                                                                                                                                                                                                                                                                                                                                                                                                          | 1.777021 | 0.000000 |          |          |   |   |     |          |  |  |  |  |     |          |          |  |  |  |      |          |          |          |  |  |      |          |          |          |          |  |     |          |          |          |          |          |      |          |          |          |          |          |      |          |          |          |          |          |     |          |          |          |          |          |     |          |          |          |          |          |       |          |          |          |          |          |  |   |   |   |   |    |      |          |  |  |  |  |      |          |          |  |  |  |     |          |          |          |  |  |     |          |          |          |          |  |       |          |          |          |          |          |
| 9 B                                                                                                                            | 2.192197                                                                                                                                                                                                                                                                                                                                                                                                                                                                                                                                                                                                                                                                                                                                                                                                                                                                                                                                                                                                                                                                                                                                                                                                                                                                                                                                                                                                                                                                                                                                                                                                                                                                                                                          | 1.791777 | 1.631389 | 0.000000 |          |   |   |     |          |  |  |  |  |     |          |          |  |  |  |      |          |          |          |  |  |      |          |          |          |          |  |     |          |          |          |          |          |      |          |          |          |          |          |      |          |          |          |          |          |     |          |          |          |          |          |     |          |          |          |          |          |       |          |          |          |          |          |  |   |   |   |   |    |      |          |  |  |  |  |      |          |          |  |  |  |     |          |          |          |  |  |     |          |          |          |          |  |       |          |          |          |          |          |
| 10 Os                                                                                                                          | 2.784506                                                                                                                                                                                                                                                                                                                                                                                                                                                                                                                                                                                                                                                                                                                                                                                                                                                                                                                                                                                                                                                                                                                                                                                                                                                                                                                                                                                                                                                                                                                                                                                                                                                                                                                          | 3.371845 | 3.445894 | 3.682488 | 0.000000 |   |   |     |          |  |  |  |  |     |          |          |  |  |  |      |          |          |          |  |  |      |          |          |          |          |  |     |          |          |          |          |          |      |          |          |          |          |          |      |          |          |          |          |          |     |          |          |          |          |          |     |          |          |          |          |          |       |          |          |          |          |          |  |   |   |   |   |    |      |          |  |  |  |  |      |          |          |  |  |  |     |          |          |          |  |  |     |          |          |          |          |  |       |          |          |          |          |          |

| 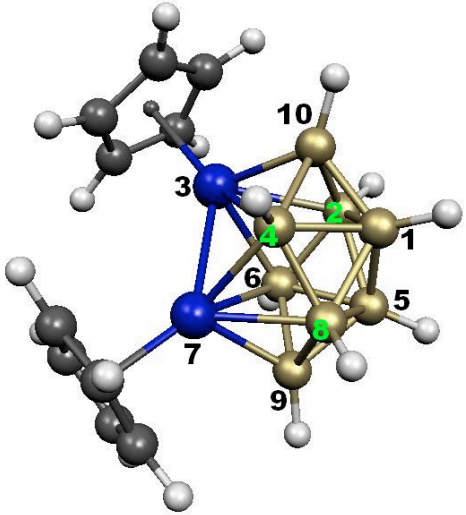 <p>7. -772.28138188 +24.6 C<sub>2</sub></p>  | <table border="1"> <thead> <tr> <th></th> <th>1</th> <th>2</th> <th>3</th> <th>4</th> <th>5</th> </tr> </thead> <tbody> <tr><td>1 B</td><td>0.000000</td><td></td><td></td><td></td><td></td></tr> <tr><td>2 B</td><td>1.809933</td><td>0.000000</td><td></td><td></td><td></td></tr> <tr><td>3 Os</td><td>3.110430</td><td>2.294731</td><td>0.000000</td><td></td><td></td></tr> <tr><td>4 B</td><td>1.844882</td><td>2.720526</td><td>2.380368</td><td>0.000000</td><td></td></tr> <tr><td>5 B</td><td>1.796805</td><td>1.794794</td><td>3.387141</td><td>2.861812</td><td>0.000000</td></tr> <tr><td>6 B</td><td>2.861812</td><td>1.769680</td><td>2.245741</td><td>3.047397</td><td>1.844882</td></tr> <tr><td>7 Os</td><td>3.387141</td><td>3.394518</td><td>2.436649</td><td>2.245741</td><td>3.110430</td></tr> <tr><td>8 B</td><td>1.794794</td><td>2.830127</td><td>3.394518</td><td>1.769680</td><td>1.809933</td></tr> <tr><td>9 B</td><td>2.986056</td><td>2.983170</td><td>3.471719</td><td>3.022502</td><td>1.736013</td></tr> <tr><td>10 B</td><td>1.736013</td><td>1.779336</td><td>2.046036</td><td>1.853411</td><td>2.986056</td></tr> <tr> <td></td> <td>6</td> <td>7</td> <td>8</td> <td>9</td> <td>10</td> </tr> <tr><td>6 B</td><td>0.000000</td><td></td><td></td><td></td><td></td></tr> <tr><td>7 Os</td><td>2.380368</td><td>0.000000</td><td></td><td></td><td></td></tr> <tr><td>8 B</td><td>2.720526</td><td>2.294731</td><td>0.000000</td><td></td><td></td></tr> <tr><td>9 B</td><td>1.853411</td><td>2.046036</td><td>1.779336</td><td>0.000000</td><td></td></tr> <tr><td>10 B</td><td>3.022502</td><td>3.471719</td><td>2.983170</td><td>3.878235</td><td>0.000000</td></tr> </tbody> </table> |          | 1        | 2        | 3        | 4 | 5 | 1 B  | 0.000000 |  |  |  |  | 2 B | 1.809933 | 0.000000 |  |  |  | 3 Os | 3.110430 | 2.294731 | 0.000000 |  |  | 4 B | 1.844882 | 2.720526 | 2.380368 | 0.000000 |  | 5 B  | 1.796805 | 1.794794 | 3.387141 | 2.861812 | 0.000000 | 6 B  | 2.861812 | 1.769680 | 2.245741 | 3.047397 | 1.844882 | 7 Os | 3.387141 | 3.394518 | 2.436649 | 2.245741 | 3.110430 | 8 B  | 1.794794 | 2.830127 | 3.394518 | 1.769680 | 1.809933 | 9 B | 2.986056 | 2.983170 | 3.471719 | 3.022502 | 1.736013 | 10 B | 1.736013 | 1.779336 | 2.046036 | 1.853411 | 2.986056 |  | 6 | 7 | 8 | 9 | 10 | 6 B  | 0.000000 |  |  |  |  | 7 Os | 2.380368 | 0.000000 |  |  |  | 8 B  | 2.720526 | 2.294731 | 0.000000 |  |  | 9 B | 1.853411 | 2.046036 | 1.779336 | 0.000000 |  | 10 B | 3.022502 | 3.471719 | 2.983170 | 3.878235 | 0.000000 |
|--------------------------------------------------------------------------------------------------------------------------------|----------------------------------------------------------------------------------------------------------------------------------------------------------------------------------------------------------------------------------------------------------------------------------------------------------------------------------------------------------------------------------------------------------------------------------------------------------------------------------------------------------------------------------------------------------------------------------------------------------------------------------------------------------------------------------------------------------------------------------------------------------------------------------------------------------------------------------------------------------------------------------------------------------------------------------------------------------------------------------------------------------------------------------------------------------------------------------------------------------------------------------------------------------------------------------------------------------------------------------------------------------------------------------------------------------------------------------------------------------------------------------------------------------------------------------------------------------------------------------------------------------------------------------------------------------------------------------------------------------------------------------------------------------------------------------------------------------------------------------|----------|----------|----------|----------|---|---|------|----------|--|--|--|--|-----|----------|----------|--|--|--|------|----------|----------|----------|--|--|-----|----------|----------|----------|----------|--|------|----------|----------|----------|----------|----------|------|----------|----------|----------|----------|----------|------|----------|----------|----------|----------|----------|------|----------|----------|----------|----------|----------|-----|----------|----------|----------|----------|----------|------|----------|----------|----------|----------|----------|--|---|---|---|---|----|------|----------|--|--|--|--|------|----------|----------|--|--|--|------|----------|----------|----------|--|--|-----|----------|----------|----------|----------|--|------|----------|----------|----------|----------|----------|
|                                                                                                                                | 1                                                                                                                                                                                                                                                                                                                                                                                                                                                                                                                                                                                                                                                                                                                                                                                                                                                                                                                                                                                                                                                                                                                                                                                                                                                                                                                                                                                                                                                                                                                                                                                                                                                                                                                                | 2        | 3        | 4        | 5        |   |   |      |          |  |  |  |  |     |          |          |  |  |  |      |          |          |          |  |  |     |          |          |          |          |  |      |          |          |          |          |          |      |          |          |          |          |          |      |          |          |          |          |          |      |          |          |          |          |          |     |          |          |          |          |          |      |          |          |          |          |          |  |   |   |   |   |    |      |          |  |  |  |  |      |          |          |  |  |  |      |          |          |          |  |  |     |          |          |          |          |  |      |          |          |          |          |          |
| 1 B                                                                                                                            | 0.000000                                                                                                                                                                                                                                                                                                                                                                                                                                                                                                                                                                                                                                                                                                                                                                                                                                                                                                                                                                                                                                                                                                                                                                                                                                                                                                                                                                                                                                                                                                                                                                                                                                                                                                                         |          |          |          |          |   |   |      |          |  |  |  |  |     |          |          |  |  |  |      |          |          |          |  |  |     |          |          |          |          |  |      |          |          |          |          |          |      |          |          |          |          |          |      |          |          |          |          |          |      |          |          |          |          |          |     |          |          |          |          |          |      |          |          |          |          |          |  |   |   |   |   |    |      |          |  |  |  |  |      |          |          |  |  |  |      |          |          |          |  |  |     |          |          |          |          |  |      |          |          |          |          |          |
| 2 B                                                                                                                            | 1.809933                                                                                                                                                                                                                                                                                                                                                                                                                                                                                                                                                                                                                                                                                                                                                                                                                                                                                                                                                                                                                                                                                                                                                                                                                                                                                                                                                                                                                                                                                                                                                                                                                                                                                                                         | 0.000000 |          |          |          |   |   |      |          |  |  |  |  |     |          |          |  |  |  |      |          |          |          |  |  |     |          |          |          |          |  |      |          |          |          |          |          |      |          |          |          |          |          |      |          |          |          |          |          |      |          |          |          |          |          |     |          |          |          |          |          |      |          |          |          |          |          |  |   |   |   |   |    |      |          |  |  |  |  |      |          |          |  |  |  |      |          |          |          |  |  |     |          |          |          |          |  |      |          |          |          |          |          |
| 3 Os                                                                                                                           | 3.110430                                                                                                                                                                                                                                                                                                                                                                                                                                                                                                                                                                                                                                                                                                                                                                                                                                                                                                                                                                                                                                                                                                                                                                                                                                                                                                                                                                                                                                                                                                                                                                                                                                                                                                                         | 2.294731 | 0.000000 |          |          |   |   |      |          |  |  |  |  |     |          |          |  |  |  |      |          |          |          |  |  |     |          |          |          |          |  |      |          |          |          |          |          |      |          |          |          |          |          |      |          |          |          |          |          |      |          |          |          |          |          |     |          |          |          |          |          |      |          |          |          |          |          |  |   |   |   |   |    |      |          |  |  |  |  |      |          |          |  |  |  |      |          |          |          |  |  |     |          |          |          |          |  |      |          |          |          |          |          |
| 4 B                                                                                                                            | 1.844882                                                                                                                                                                                                                                                                                                                                                                                                                                                                                                                                                                                                                                                                                                                                                                                                                                                                                                                                                                                                                                                                                                                                                                                                                                                                                                                                                                                                                                                                                                                                                                                                                                                                                                                         | 2.720526 | 2.380368 | 0.000000 |          |   |   |      |          |  |  |  |  |     |          |          |  |  |  |      |          |          |          |  |  |     |          |          |          |          |  |      |          |          |          |          |          |      |          |          |          |          |          |      |          |          |          |          |          |      |          |          |          |          |          |     |          |          |          |          |          |      |          |          |          |          |          |  |   |   |   |   |    |      |          |  |  |  |  |      |          |          |  |  |  |      |          |          |          |  |  |     |          |          |          |          |  |      |          |          |          |          |          |
| 5 B                                                                                                                            | 1.796805                                                                                                                                                                                                                                                                                                                                                                                                                                                                                                                                                                                                                                                                                                                                                                                                                                                                                                                                                                                                                                                                                                                                                                                                                                                                                                                                                                                                                                                                                                                                                                                                                                                                                                                         | 1.794794 | 3.387141 | 2.861812 | 0.000000 |   |   |      |          |  |  |  |  |     |          |          |  |  |  |      |          |          |          |  |  |     |          |          |          |          |  |      |          |          |          |          |          |      |          |          |          |          |          |      |          |          |          |          |          |      |          |          |          |          |          |     |          |          |          |          |          |      |          |          |          |          |          |  |   |   |   |   |    |      |          |  |  |  |  |      |          |          |  |  |  |      |          |          |          |  |  |     |          |          |          |          |  |      |          |          |          |          |          |
| 6 B                                                                                                                            | 2.861812                                                                                                                                                                                                                                                                                                                                                                                                                                                                                                                                                                                                                                                                                                                                                                                                                                                                                                                                                                                                                                                                                                                                                                                                                                                                                                                                                                                                                                                                                                                                                                                                                                                                                                                         | 1.769680 | 2.245741 | 3.047397 | 1.844882 |   |   |      |          |  |  |  |  |     |          |          |  |  |  |      |          |          |          |  |  |     |          |          |          |          |  |      |          |          |          |          |          |      |          |          |          |          |          |      |          |          |          |          |          |      |          |          |          |          |          |     |          |          |          |          |          |      |          |          |          |          |          |  |   |   |   |   |    |      |          |  |  |  |  |      |          |          |  |  |  |      |          |          |          |  |  |     |          |          |          |          |  |      |          |          |          |          |          |
| 7 Os                                                                                                                           | 3.387141                                                                                                                                                                                                                                                                                                                                                                                                                                                                                                                                                                                                                                                                                                                                                                                                                                                                                                                                                                                                                                                                                                                                                                                                                                                                                                                                                                                                                                                                                                                                                                                                                                                                                                                         | 3.394518 | 2.436649 | 2.245741 | 3.110430 |   |   |      |          |  |  |  |  |     |          |          |  |  |  |      |          |          |          |  |  |     |          |          |          |          |  |      |          |          |          |          |          |      |          |          |          |          |          |      |          |          |          |          |          |      |          |          |          |          |          |     |          |          |          |          |          |      |          |          |          |          |          |  |   |   |   |   |    |      |          |  |  |  |  |      |          |          |  |  |  |      |          |          |          |  |  |     |          |          |          |          |  |      |          |          |          |          |          |
| 8 B                                                                                                                            | 1.794794                                                                                                                                                                                                                                                                                                                                                                                                                                                                                                                                                                                                                                                                                                                                                                                                                                                                                                                                                                                                                                                                                                                                                                                                                                                                                                                                                                                                                                                                                                                                                                                                                                                                                                                         | 2.830127 | 3.394518 | 1.769680 | 1.809933 |   |   |      |          |  |  |  |  |     |          |          |  |  |  |      |          |          |          |  |  |     |          |          |          |          |  |      |          |          |          |          |          |      |          |          |          |          |          |      |          |          |          |          |          |      |          |          |          |          |          |     |          |          |          |          |          |      |          |          |          |          |          |  |   |   |   |   |    |      |          |  |  |  |  |      |          |          |  |  |  |      |          |          |          |  |  |     |          |          |          |          |  |      |          |          |          |          |          |
| 9 B                                                                                                                            | 2.986056                                                                                                                                                                                                                                                                                                                                                                                                                                                                                                                                                                                                                                                                                                                                                                                                                                                                                                                                                                                                                                                                                                                                                                                                                                                                                                                                                                                                                                                                                                                                                                                                                                                                                                                         | 2.983170 | 3.471719 | 3.022502 | 1.736013 |   |   |      |          |  |  |  |  |     |          |          |  |  |  |      |          |          |          |  |  |     |          |          |          |          |  |      |          |          |          |          |          |      |          |          |          |          |          |      |          |          |          |          |          |      |          |          |          |          |          |     |          |          |          |          |          |      |          |          |          |          |          |  |   |   |   |   |    |      |          |  |  |  |  |      |          |          |  |  |  |      |          |          |          |  |  |     |          |          |          |          |  |      |          |          |          |          |          |
| 10 B                                                                                                                           | 1.736013                                                                                                                                                                                                                                                                                                                                                                                                                                                                                                                                                                                                                                                                                                                                                                                                                                                                                                                                                                                                                                                                                                                                                                                                                                                                                                                                                                                                                                                                                                                                                                                                                                                                                                                         | 1.779336 | 2.046036 | 1.853411 | 2.986056 |   |   |      |          |  |  |  |  |     |          |          |  |  |  |      |          |          |          |  |  |     |          |          |          |          |  |      |          |          |          |          |          |      |          |          |          |          |          |      |          |          |          |          |          |      |          |          |          |          |          |     |          |          |          |          |          |      |          |          |          |          |          |  |   |   |   |   |    |      |          |  |  |  |  |      |          |          |  |  |  |      |          |          |          |  |  |     |          |          |          |          |  |      |          |          |          |          |          |
|                                                                                                                                | 6                                                                                                                                                                                                                                                                                                                                                                                                                                                                                                                                                                                                                                                                                                                                                                                                                                                                                                                                                                                                                                                                                                                                                                                                                                                                                                                                                                                                                                                                                                                                                                                                                                                                                                                                | 7        | 8        | 9        | 10       |   |   |      |          |  |  |  |  |     |          |          |  |  |  |      |          |          |          |  |  |     |          |          |          |          |  |      |          |          |          |          |          |      |          |          |          |          |          |      |          |          |          |          |          |      |          |          |          |          |          |     |          |          |          |          |          |      |          |          |          |          |          |  |   |   |   |   |    |      |          |  |  |  |  |      |          |          |  |  |  |      |          |          |          |  |  |     |          |          |          |          |  |      |          |          |          |          |          |
| 6 B                                                                                                                            | 0.000000                                                                                                                                                                                                                                                                                                                                                                                                                                                                                                                                                                                                                                                                                                                                                                                                                                                                                                                                                                                                                                                                                                                                                                                                                                                                                                                                                                                                                                                                                                                                                                                                                                                                                                                         |          |          |          |          |   |   |      |          |  |  |  |  |     |          |          |  |  |  |      |          |          |          |  |  |     |          |          |          |          |  |      |          |          |          |          |          |      |          |          |          |          |          |      |          |          |          |          |          |      |          |          |          |          |          |     |          |          |          |          |          |      |          |          |          |          |          |  |   |   |   |   |    |      |          |  |  |  |  |      |          |          |  |  |  |      |          |          |          |  |  |     |          |          |          |          |  |      |          |          |          |          |          |
| 7 Os                                                                                                                           | 2.380368                                                                                                                                                                                                                                                                                                                                                                                                                                                                                                                                                                                                                                                                                                                                                                                                                                                                                                                                                                                                                                                                                                                                                                                                                                                                                                                                                                                                                                                                                                                                                                                                                                                                                                                         | 0.000000 |          |          |          |   |   |      |          |  |  |  |  |     |          |          |  |  |  |      |          |          |          |  |  |     |          |          |          |          |  |      |          |          |          |          |          |      |          |          |          |          |          |      |          |          |          |          |          |      |          |          |          |          |          |     |          |          |          |          |          |      |          |          |          |          |          |  |   |   |   |   |    |      |          |  |  |  |  |      |          |          |  |  |  |      |          |          |          |  |  |     |          |          |          |          |  |      |          |          |          |          |          |
| 8 B                                                                                                                            | 2.720526                                                                                                                                                                                                                                                                                                                                                                                                                                                                                                                                                                                                                                                                                                                                                                                                                                                                                                                                                                                                                                                                                                                                                                                                                                                                                                                                                                                                                                                                                                                                                                                                                                                                                                                         | 2.294731 | 0.000000 |          |          |   |   |      |          |  |  |  |  |     |          |          |  |  |  |      |          |          |          |  |  |     |          |          |          |          |  |      |          |          |          |          |          |      |          |          |          |          |          |      |          |          |          |          |          |      |          |          |          |          |          |     |          |          |          |          |          |      |          |          |          |          |          |  |   |   |   |   |    |      |          |  |  |  |  |      |          |          |  |  |  |      |          |          |          |  |  |     |          |          |          |          |  |      |          |          |          |          |          |
| 9 B                                                                                                                            | 1.853411                                                                                                                                                                                                                                                                                                                                                                                                                                                                                                                                                                                                                                                                                                                                                                                                                                                                                                                                                                                                                                                                                                                                                                                                                                                                                                                                                                                                                                                                                                                                                                                                                                                                                                                         | 2.046036 | 1.779336 | 0.000000 |          |   |   |      |          |  |  |  |  |     |          |          |  |  |  |      |          |          |          |  |  |     |          |          |          |          |  |      |          |          |          |          |          |      |          |          |          |          |          |      |          |          |          |          |          |      |          |          |          |          |          |     |          |          |          |          |          |      |          |          |          |          |          |  |   |   |   |   |    |      |          |  |  |  |  |      |          |          |  |  |  |      |          |          |          |  |  |     |          |          |          |          |  |      |          |          |          |          |          |
| 10 B                                                                                                                           | 3.022502                                                                                                                                                                                                                                                                                                                                                                                                                                                                                                                                                                                                                                                                                                                                                                                                                                                                                                                                                                                                                                                                                                                                                                                                                                                                                                                                                                                                                                                                                                                                                                                                                                                                                                                         | 3.471719 | 2.983170 | 3.878235 | 0.000000 |   |   |      |          |  |  |  |  |     |          |          |  |  |  |      |          |          |          |  |  |     |          |          |          |          |  |      |          |          |          |          |          |      |          |          |          |          |          |      |          |          |          |          |          |      |          |          |          |          |          |     |          |          |          |          |          |      |          |          |          |          |          |  |   |   |   |   |    |      |          |  |  |  |  |      |          |          |  |  |  |      |          |          |          |  |  |     |          |          |          |          |  |      |          |          |          |          |          |
|  <p>8. -772.27815302 +26.6 C<sub>s</sub></p> | <table border="1"> <thead> <tr> <th></th> <th>1</th> <th>2</th> <th>3</th> <th>4</th> <th>5</th> </tr> </thead> <tbody> <tr><td>1 B</td><td>0.000000</td><td></td><td></td><td></td><td></td></tr> <tr><td>2 B</td><td>1.893871</td><td>0.000000</td><td></td><td></td><td></td></tr> <tr><td>3 B</td><td>3.127627</td><td>1.884611</td><td>0.000000</td><td></td><td></td></tr> <tr><td>4 B</td><td>1.814560</td><td>3.074375</td><td>3.271835</td><td>0.000000</td><td></td></tr> <tr><td>5 Os</td><td>2.257484</td><td>2.265786</td><td>2.115336</td><td>2.103245</td><td>0.000000</td></tr> <tr><td>6 B</td><td>1.812112</td><td>1.790814</td><td>3.036790</td><td>2.984775</td><td>3.396446</td></tr> <tr><td>7 B</td><td>1.781448</td><td>2.911674</td><td>3.529552</td><td>1.733799</td><td>3.242244</td></tr> <tr><td>8 Os</td><td>3.052613</td><td>3.031478</td><td>2.159163</td><td>2.208301</td><td>2.645368</td></tr> <tr><td>9 B</td><td>2.925428</td><td>1.761644</td><td>1.781079</td><td>3.507488</td><td>3.248099</td></tr> <tr><td>10 B</td><td>2.886178</td><td>2.863242</td><td>3.039156</td><td>3.023553</td><td>3.829836</td></tr> <tr> <td></td> <td>6</td> <td>7</td> <td>8</td> <td>9</td> <td>10</td> </tr> <tr><td>6 B</td><td>0.000000</td><td></td><td></td><td></td><td></td></tr> <tr><td>7 B</td><td>1.826429</td><td>0.000000</td><td></td><td></td><td></td></tr> <tr><td>8 Os</td><td>3.031181</td><td>2.383651</td><td>0.000000</td><td></td><td></td></tr> <tr><td>9 B</td><td>1.816043</td><td>2.840662</td><td>2.374239</td><td>0.000000</td><td></td></tr> <tr><td>10 B</td><td>1.729661</td><td>1.753242</td><td>2.108944</td><td>1.746900</td><td>0.000000</td></tr> </tbody> </table> |          | 1        | 2        | 3        | 4 | 5 | 1 B  | 0.000000 |  |  |  |  | 2 B | 1.893871 | 0.000000 |  |  |  | 3 B  | 3.127627 | 1.884611 | 0.000000 |  |  | 4 B | 1.814560 | 3.074375 | 3.271835 | 0.000000 |  | 5 Os | 2.257484 | 2.265786 | 2.115336 | 2.103245 | 0.000000 | 6 B  | 1.812112 | 1.790814 | 3.036790 | 2.984775 | 3.396446 | 7 B  | 1.781448 | 2.911674 | 3.529552 | 1.733799 | 3.242244 | 8 Os | 3.052613 | 3.031478 | 2.159163 | 2.208301 | 2.645368 | 9 B | 2.925428 | 1.761644 | 1.781079 | 3.507488 | 3.248099 | 10 B | 2.886178 | 2.863242 | 3.039156 | 3.023553 | 3.829836 |  | 6 | 7 | 8 | 9 | 10 | 6 B  | 0.000000 |  |  |  |  | 7 B  | 1.826429 | 0.000000 |  |  |  | 8 Os | 3.031181 | 2.383651 | 0.000000 |  |  | 9 B | 1.816043 | 2.840662 | 2.374239 | 0.000000 |  | 10 B | 1.729661 | 1.753242 | 2.108944 | 1.746900 | 0.000000 |
|                                                                                                                                | 1                                                                                                                                                                                                                                                                                                                                                                                                                                                                                                                                                                                                                                                                                                                                                                                                                                                                                                                                                                                                                                                                                                                                                                                                                                                                                                                                                                                                                                                                                                                                                                                                                                                                                                                                | 2        | 3        | 4        | 5        |   |   |      |          |  |  |  |  |     |          |          |  |  |  |      |          |          |          |  |  |     |          |          |          |          |  |      |          |          |          |          |          |      |          |          |          |          |          |      |          |          |          |          |          |      |          |          |          |          |          |     |          |          |          |          |          |      |          |          |          |          |          |  |   |   |   |   |    |      |          |  |  |  |  |      |          |          |  |  |  |      |          |          |          |  |  |     |          |          |          |          |  |      |          |          |          |          |          |
| 1 B                                                                                                                            | 0.000000                                                                                                                                                                                                                                                                                                                                                                                                                                                                                                                                                                                                                                                                                                                                                                                                                                                                                                                                                                                                                                                                                                                                                                                                                                                                                                                                                                                                                                                                                                                                                                                                                                                                                                                         |          |          |          |          |   |   |      |          |  |  |  |  |     |          |          |  |  |  |      |          |          |          |  |  |     |          |          |          |          |  |      |          |          |          |          |          |      |          |          |          |          |          |      |          |          |          |          |          |      |          |          |          |          |          |     |          |          |          |          |          |      |          |          |          |          |          |  |   |   |   |   |    |      |          |  |  |  |  |      |          |          |  |  |  |      |          |          |          |  |  |     |          |          |          |          |  |      |          |          |          |          |          |
| 2 B                                                                                                                            | 1.893871                                                                                                                                                                                                                                                                                                                                                                                                                                                                                                                                                                                                                                                                                                                                                                                                                                                                                                                                                                                                                                                                                                                                                                                                                                                                                                                                                                                                                                                                                                                                                                                                                                                                                                                         | 0.000000 |          |          |          |   |   |      |          |  |  |  |  |     |          |          |  |  |  |      |          |          |          |  |  |     |          |          |          |          |  |      |          |          |          |          |          |      |          |          |          |          |          |      |          |          |          |          |          |      |          |          |          |          |          |     |          |          |          |          |          |      |          |          |          |          |          |  |   |   |   |   |    |      |          |  |  |  |  |      |          |          |  |  |  |      |          |          |          |  |  |     |          |          |          |          |  |      |          |          |          |          |          |
| 3 B                                                                                                                            | 3.127627                                                                                                                                                                                                                                                                                                                                                                                                                                                                                                                                                                                                                                                                                                                                                                                                                                                                                                                                                                                                                                                                                                                                                                                                                                                                                                                                                                                                                                                                                                                                                                                                                                                                                                                         | 1.884611 | 0.000000 |          |          |   |   |      |          |  |  |  |  |     |          |          |  |  |  |      |          |          |          |  |  |     |          |          |          |          |  |      |          |          |          |          |          |      |          |          |          |          |          |      |          |          |          |          |          |      |          |          |          |          |          |     |          |          |          |          |          |      |          |          |          |          |          |  |   |   |   |   |    |      |          |  |  |  |  |      |          |          |  |  |  |      |          |          |          |  |  |     |          |          |          |          |  |      |          |          |          |          |          |
| 4 B                                                                                                                            | 1.814560                                                                                                                                                                                                                                                                                                                                                                                                                                                                                                                                                                                                                                                                                                                                                                                                                                                                                                                                                                                                                                                                                                                                                                                                                                                                                                                                                                                                                                                                                                                                                                                                                                                                                                                         | 3.074375 | 3.271835 | 0.000000 |          |   |   |      |          |  |  |  |  |     |          |          |  |  |  |      |          |          |          |  |  |     |          |          |          |          |  |      |          |          |          |          |          |      |          |          |          |          |          |      |          |          |          |          |          |      |          |          |          |          |          |     |          |          |          |          |          |      |          |          |          |          |          |  |   |   |   |   |    |      |          |  |  |  |  |      |          |          |  |  |  |      |          |          |          |  |  |     |          |          |          |          |  |      |          |          |          |          |          |
| 5 Os                                                                                                                           | 2.257484                                                                                                                                                                                                                                                                                                                                                                                                                                                                                                                                                                                                                                                                                                                                                                                                                                                                                                                                                                                                                                                                                                                                                                                                                                                                                                                                                                                                                                                                                                                                                                                                                                                                                                                         | 2.265786 | 2.115336 | 2.103245 | 0.000000 |   |   |      |          |  |  |  |  |     |          |          |  |  |  |      |          |          |          |  |  |     |          |          |          |          |  |      |          |          |          |          |          |      |          |          |          |          |          |      |          |          |          |          |          |      |          |          |          |          |          |     |          |          |          |          |          |      |          |          |          |          |          |  |   |   |   |   |    |      |          |  |  |  |  |      |          |          |  |  |  |      |          |          |          |  |  |     |          |          |          |          |  |      |          |          |          |          |          |
| 6 B                                                                                                                            | 1.812112                                                                                                                                                                                                                                                                                                                                                                                                                                                                                                                                                                                                                                                                                                                                                                                                                                                                                                                                                                                                                                                                                                                                                                                                                                                                                                                                                                                                                                                                                                                                                                                                                                                                                                                         | 1.790814 | 3.036790 | 2.984775 | 3.396446 |   |   |      |          |  |  |  |  |     |          |          |  |  |  |      |          |          |          |  |  |     |          |          |          |          |  |      |          |          |          |          |          |      |          |          |          |          |          |      |          |          |          |          |          |      |          |          |          |          |          |     |          |          |          |          |          |      |          |          |          |          |          |  |   |   |   |   |    |      |          |  |  |  |  |      |          |          |  |  |  |      |          |          |          |  |  |     |          |          |          |          |  |      |          |          |          |          |          |
| 7 B                                                                                                                            | 1.781448                                                                                                                                                                                                                                                                                                                                                                                                                                                                                                                                                                                                                                                                                                                                                                                                                                                                                                                                                                                                                                                                                                                                                                                                                                                                                                                                                                                                                                                                                                                                                                                                                                                                                                                         | 2.911674 | 3.529552 | 1.733799 | 3.242244 |   |   |      |          |  |  |  |  |     |          |          |  |  |  |      |          |          |          |  |  |     |          |          |          |          |  |      |          |          |          |          |          |      |          |          |          |          |          |      |          |          |          |          |          |      |          |          |          |          |          |     |          |          |          |          |          |      |          |          |          |          |          |  |   |   |   |   |    |      |          |  |  |  |  |      |          |          |  |  |  |      |          |          |          |  |  |     |          |          |          |          |  |      |          |          |          |          |          |
| 8 Os                                                                                                                           | 3.052613                                                                                                                                                                                                                                                                                                                                                                                                                                                                                                                                                                                                                                                                                                                                                                                                                                                                                                                                                                                                                                                                                                                                                                                                                                                                                                                                                                                                                                                                                                                                                                                                                                                                                                                         | 3.031478 | 2.159163 | 2.208301 | 2.645368 |   |   |      |          |  |  |  |  |     |          |          |  |  |  |      |          |          |          |  |  |     |          |          |          |          |  |      |          |          |          |          |          |      |          |          |          |          |          |      |          |          |          |          |          |      |          |          |          |          |          |     |          |          |          |          |          |      |          |          |          |          |          |  |   |   |   |   |    |      |          |  |  |  |  |      |          |          |  |  |  |      |          |          |          |  |  |     |          |          |          |          |  |      |          |          |          |          |          |
| 9 B                                                                                                                            | 2.925428                                                                                                                                                                                                                                                                                                                                                                                                                                                                                                                                                                                                                                                                                                                                                                                                                                                                                                                                                                                                                                                                                                                                                                                                                                                                                                                                                                                                                                                                                                                                                                                                                                                                                                                         | 1.761644 | 1.781079 | 3.507488 | 3.248099 |   |   |      |          |  |  |  |  |     |          |          |  |  |  |      |          |          |          |  |  |     |          |          |          |          |  |      |          |          |          |          |          |      |          |          |          |          |          |      |          |          |          |          |          |      |          |          |          |          |          |     |          |          |          |          |          |      |          |          |          |          |          |  |   |   |   |   |    |      |          |  |  |  |  |      |          |          |  |  |  |      |          |          |          |  |  |     |          |          |          |          |  |      |          |          |          |          |          |
| 10 B                                                                                                                           | 2.886178                                                                                                                                                                                                                                                                                                                                                                                                                                                                                                                                                                                                                                                                                                                                                                                                                                                                                                                                                                                                                                                                                                                                                                                                                                                                                                                                                                                                                                                                                                                                                                                                                                                                                                                         | 2.863242 | 3.039156 | 3.023553 | 3.829836 |   |   |      |          |  |  |  |  |     |          |          |  |  |  |      |          |          |          |  |  |     |          |          |          |          |  |      |          |          |          |          |          |      |          |          |          |          |          |      |          |          |          |          |          |      |          |          |          |          |          |     |          |          |          |          |          |      |          |          |          |          |          |  |   |   |   |   |    |      |          |  |  |  |  |      |          |          |  |  |  |      |          |          |          |  |  |     |          |          |          |          |  |      |          |          |          |          |          |
|                                                                                                                                | 6                                                                                                                                                                                                                                                                                                                                                                                                                                                                                                                                                                                                                                                                                                                                                                                                                                                                                                                                                                                                                                                                                                                                                                                                                                                                                                                                                                                                                                                                                                                                                                                                                                                                                                                                | 7        | 8        | 9        | 10       |   |   |      |          |  |  |  |  |     |          |          |  |  |  |      |          |          |          |  |  |     |          |          |          |          |  |      |          |          |          |          |          |      |          |          |          |          |          |      |          |          |          |          |          |      |          |          |          |          |          |     |          |          |          |          |          |      |          |          |          |          |          |  |   |   |   |   |    |      |          |  |  |  |  |      |          |          |  |  |  |      |          |          |          |  |  |     |          |          |          |          |  |      |          |          |          |          |          |
| 6 B                                                                                                                            | 0.000000                                                                                                                                                                                                                                                                                                                                                                                                                                                                                                                                                                                                                                                                                                                                                                                                                                                                                                                                                                                                                                                                                                                                                                                                                                                                                                                                                                                                                                                                                                                                                                                                                                                                                                                         |          |          |          |          |   |   |      |          |  |  |  |  |     |          |          |  |  |  |      |          |          |          |  |  |     |          |          |          |          |  |      |          |          |          |          |          |      |          |          |          |          |          |      |          |          |          |          |          |      |          |          |          |          |          |     |          |          |          |          |          |      |          |          |          |          |          |  |   |   |   |   |    |      |          |  |  |  |  |      |          |          |  |  |  |      |          |          |          |  |  |     |          |          |          |          |  |      |          |          |          |          |          |
| 7 B                                                                                                                            | 1.826429                                                                                                                                                                                                                                                                                                                                                                                                                                                                                                                                                                                                                                                                                                                                                                                                                                                                                                                                                                                                                                                                                                                                                                                                                                                                                                                                                                                                                                                                                                                                                                                                                                                                                                                         | 0.000000 |          |          |          |   |   |      |          |  |  |  |  |     |          |          |  |  |  |      |          |          |          |  |  |     |          |          |          |          |  |      |          |          |          |          |          |      |          |          |          |          |          |      |          |          |          |          |          |      |          |          |          |          |          |     |          |          |          |          |          |      |          |          |          |          |          |  |   |   |   |   |    |      |          |  |  |  |  |      |          |          |  |  |  |      |          |          |          |  |  |     |          |          |          |          |  |      |          |          |          |          |          |
| 8 Os                                                                                                                           | 3.031181                                                                                                                                                                                                                                                                                                                                                                                                                                                                                                                                                                                                                                                                                                                                                                                                                                                                                                                                                                                                                                                                                                                                                                                                                                                                                                                                                                                                                                                                                                                                                                                                                                                                                                                         | 2.383651 | 0.000000 |          |          |   |   |      |          |  |  |  |  |     |          |          |  |  |  |      |          |          |          |  |  |     |          |          |          |          |  |      |          |          |          |          |          |      |          |          |          |          |          |      |          |          |          |          |          |      |          |          |          |          |          |     |          |          |          |          |          |      |          |          |          |          |          |  |   |   |   |   |    |      |          |  |  |  |  |      |          |          |  |  |  |      |          |          |          |  |  |     |          |          |          |          |  |      |          |          |          |          |          |
| 9 B                                                                                                                            | 1.816043                                                                                                                                                                                                                                                                                                                                                                                                                                                                                                                                                                                                                                                                                                                                                                                                                                                                                                                                                                                                                                                                                                                                                                                                                                                                                                                                                                                                                                                                                                                                                                                                                                                                                                                         | 2.840662 | 2.374239 | 0.000000 |          |   |   |      |          |  |  |  |  |     |          |          |  |  |  |      |          |          |          |  |  |     |          |          |          |          |  |      |          |          |          |          |          |      |          |          |          |          |          |      |          |          |          |          |          |      |          |          |          |          |          |     |          |          |          |          |          |      |          |          |          |          |          |  |   |   |   |   |    |      |          |  |  |  |  |      |          |          |  |  |  |      |          |          |          |  |  |     |          |          |          |          |  |      |          |          |          |          |          |
| 10 B                                                                                                                           | 1.729661                                                                                                                                                                                                                                                                                                                                                                                                                                                                                                                                                                                                                                                                                                                                                                                                                                                                                                                                                                                                                                                                                                                                                                                                                                                                                                                                                                                                                                                                                                                                                                                                                                                                                                                         | 1.753242 | 2.108944 | 1.746900 | 0.000000 |   |   |      |          |  |  |  |  |     |          |          |  |  |  |      |          |          |          |  |  |     |          |          |          |          |  |      |          |          |          |          |          |      |          |          |          |          |          |      |          |          |          |          |          |      |          |          |          |          |          |     |          |          |          |          |          |      |          |          |          |          |          |  |   |   |   |   |    |      |          |  |  |  |  |      |          |          |  |  |  |      |          |          |          |  |  |     |          |          |          |          |  |      |          |          |          |          |          |
|  <p>9. -772.27392348 +29.2</p>              | <table border="1"> <thead> <tr> <th></th> <th>1</th> <th>2</th> <th>3</th> <th>4</th> <th>5</th> </tr> </thead> <tbody> <tr><td>1 Os</td><td>0.000000</td><td></td><td></td><td></td><td></td></tr> <tr><td>2 B</td><td>2.228560</td><td>0.000000</td><td></td><td></td><td></td></tr> <tr><td>3 B</td><td>2.333670</td><td>1.890371</td><td>0.000000</td><td></td><td></td></tr> <tr><td>4 B</td><td>2.405689</td><td>2.658228</td><td>2.762820</td><td>0.000000</td><td></td></tr> <tr><td>5 B</td><td>3.199915</td><td>2.643808</td><td>1.992072</td><td>1.768196</td><td>0.000000</td></tr> <tr><td>6 Os</td><td>3.638173</td><td>2.181131</td><td>3.185364</td><td>2.257485</td><td>2.258021</td></tr> <tr><td>7 B</td><td>2.080218</td><td>1.651019</td><td>1.932781</td><td>3.701447</td><td>3.629360</td></tr> <tr><td>8 B</td><td>3.508440</td><td>1.804023</td><td>1.817438</td><td>2.956828</td><td>1.823675</td></tr> <tr><td>9 B</td><td>2.100715</td><td>2.871626</td><td>1.798372</td><td>1.771358</td><td>1.740896</td></tr> <tr><td>10 B</td><td>2.141794</td><td>1.881503</td><td>3.148686</td><td>1.850342</td><td>3.006685</td></tr> <tr> <td></td> <td>6</td> <td>7</td> <td>8</td> <td>9</td> <td>10</td> </tr> <tr><td>6 Os</td><td>0.000000</td><td></td><td></td><td></td><td></td></tr> <tr><td>7 B</td><td>3.811848</td><td>0.000000</td><td></td><td></td><td></td></tr> <tr><td>8 B</td><td>2.030053</td><td>2.876421</td><td>0.000000</td><td></td><td></td></tr> <tr><td>9 B</td><td>3.420648</td><td>3.177084</td><td>2.952385</td><td>0.000000</td><td></td></tr> <tr><td>10 B</td><td>2.079826</td><td>3.052020</td><td>3.119996</td><td>3.012111</td><td>0.000000</td></tr> </tbody> </table> |          | 1        | 2        | 3        | 4 | 5 | 1 Os | 0.000000 |  |  |  |  | 2 B | 2.228560 | 0.000000 |  |  |  | 3 B  | 2.333670 | 1.890371 | 0.000000 |  |  | 4 B | 2.405689 | 2.658228 | 2.762820 | 0.000000 |  | 5 B  | 3.199915 | 2.643808 | 1.992072 | 1.768196 | 0.000000 | 6 Os | 3.638173 | 2.181131 | 3.185364 | 2.257485 | 2.258021 | 7 B  | 2.080218 | 1.651019 | 1.932781 | 3.701447 | 3.629360 | 8 B  | 3.508440 | 1.804023 | 1.817438 | 2.956828 | 1.823675 | 9 B | 2.100715 | 2.871626 | 1.798372 | 1.771358 | 1.740896 | 10 B | 2.141794 | 1.881503 | 3.148686 | 1.850342 | 3.006685 |  | 6 | 7 | 8 | 9 | 10 | 6 Os | 0.000000 |  |  |  |  | 7 B  | 3.811848 | 0.000000 |  |  |  | 8 B  | 2.030053 | 2.876421 | 0.000000 |  |  | 9 B | 3.420648 | 3.177084 | 2.952385 | 0.000000 |  | 10 B | 2.079826 | 3.052020 | 3.119996 | 3.012111 | 0.000000 |
|                                                                                                                                | 1                                                                                                                                                                                                                                                                                                                                                                                                                                                                                                                                                                                                                                                                                                                                                                                                                                                                                                                                                                                                                                                                                                                                                                                                                                                                                                                                                                                                                                                                                                                                                                                                                                                                                                                                | 2        | 3        | 4        | 5        |   |   |      |          |  |  |  |  |     |          |          |  |  |  |      |          |          |          |  |  |     |          |          |          |          |  |      |          |          |          |          |          |      |          |          |          |          |          |      |          |          |          |          |          |      |          |          |          |          |          |     |          |          |          |          |          |      |          |          |          |          |          |  |   |   |   |   |    |      |          |  |  |  |  |      |          |          |  |  |  |      |          |          |          |  |  |     |          |          |          |          |  |      |          |          |          |          |          |
| 1 Os                                                                                                                           | 0.000000                                                                                                                                                                                                                                                                                                                                                                                                                                                                                                                                                                                                                                                                                                                                                                                                                                                                                                                                                                                                                                                                                                                                                                                                                                                                                                                                                                                                                                                                                                                                                                                                                                                                                                                         |          |          |          |          |   |   |      |          |  |  |  |  |     |          |          |  |  |  |      |          |          |          |  |  |     |          |          |          |          |  |      |          |          |          |          |          |      |          |          |          |          |          |      |          |          |          |          |          |      |          |          |          |          |          |     |          |          |          |          |          |      |          |          |          |          |          |  |   |   |   |   |    |      |          |  |  |  |  |      |          |          |  |  |  |      |          |          |          |  |  |     |          |          |          |          |  |      |          |          |          |          |          |
| 2 B                                                                                                                            | 2.228560                                                                                                                                                                                                                                                                                                                                                                                                                                                                                                                                                                                                                                                                                                                                                                                                                                                                                                                                                                                                                                                                                                                                                                                                                                                                                                                                                                                                                                                                                                                                                                                                                                                                                                                         | 0.000000 |          |          |          |   |   |      |          |  |  |  |  |     |          |          |  |  |  |      |          |          |          |  |  |     |          |          |          |          |  |      |          |          |          |          |          |      |          |          |          |          |          |      |          |          |          |          |          |      |          |          |          |          |          |     |          |          |          |          |          |      |          |          |          |          |          |  |   |   |   |   |    |      |          |  |  |  |  |      |          |          |  |  |  |      |          |          |          |  |  |     |          |          |          |          |  |      |          |          |          |          |          |
| 3 B                                                                                                                            | 2.333670                                                                                                                                                                                                                                                                                                                                                                                                                                                                                                                                                                                                                                                                                                                                                                                                                                                                                                                                                                                                                                                                                                                                                                                                                                                                                                                                                                                                                                                                                                                                                                                                                                                                                                                         | 1.890371 | 0.000000 |          |          |   |   |      |          |  |  |  |  |     |          |          |  |  |  |      |          |          |          |  |  |     |          |          |          |          |  |      |          |          |          |          |          |      |          |          |          |          |          |      |          |          |          |          |          |      |          |          |          |          |          |     |          |          |          |          |          |      |          |          |          |          |          |  |   |   |   |   |    |      |          |  |  |  |  |      |          |          |  |  |  |      |          |          |          |  |  |     |          |          |          |          |  |      |          |          |          |          |          |
| 4 B                                                                                                                            | 2.405689                                                                                                                                                                                                                                                                                                                                                                                                                                                                                                                                                                                                                                                                                                                                                                                                                                                                                                                                                                                                                                                                                                                                                                                                                                                                                                                                                                                                                                                                                                                                                                                                                                                                                                                         | 2.658228 | 2.762820 | 0.000000 |          |   |   |      |          |  |  |  |  |     |          |          |  |  |  |      |          |          |          |  |  |     |          |          |          |          |  |      |          |          |          |          |          |      |          |          |          |          |          |      |          |          |          |          |          |      |          |          |          |          |          |     |          |          |          |          |          |      |          |          |          |          |          |  |   |   |   |   |    |      |          |  |  |  |  |      |          |          |  |  |  |      |          |          |          |  |  |     |          |          |          |          |  |      |          |          |          |          |          |
| 5 B                                                                                                                            | 3.199915                                                                                                                                                                                                                                                                                                                                                                                                                                                                                                                                                                                                                                                                                                                                                                                                                                                                                                                                                                                                                                                                                                                                                                                                                                                                                                                                                                                                                                                                                                                                                                                                                                                                                                                         | 2.643808 | 1.992072 | 1.768196 | 0.000000 |   |   |      |          |  |  |  |  |     |          |          |  |  |  |      |          |          |          |  |  |     |          |          |          |          |  |      |          |          |          |          |          |      |          |          |          |          |          |      |          |          |          |          |          |      |          |          |          |          |          |     |          |          |          |          |          |      |          |          |          |          |          |  |   |   |   |   |    |      |          |  |  |  |  |      |          |          |  |  |  |      |          |          |          |  |  |     |          |          |          |          |  |      |          |          |          |          |          |
| 6 Os                                                                                                                           | 3.638173                                                                                                                                                                                                                                                                                                                                                                                                                                                                                                                                                                                                                                                                                                                                                                                                                                                                                                                                                                                                                                                                                                                                                                                                                                                                                                                                                                                                                                                                                                                                                                                                                                                                                                                         | 2.181131 | 3.185364 | 2.257485 | 2.258021 |   |   |      |          |  |  |  |  |     |          |          |  |  |  |      |          |          |          |  |  |     |          |          |          |          |  |      |          |          |          |          |          |      |          |          |          |          |          |      |          |          |          |          |          |      |          |          |          |          |          |     |          |          |          |          |          |      |          |          |          |          |          |  |   |   |   |   |    |      |          |  |  |  |  |      |          |          |  |  |  |      |          |          |          |  |  |     |          |          |          |          |  |      |          |          |          |          |          |
| 7 B                                                                                                                            | 2.080218                                                                                                                                                                                                                                                                                                                                                                                                                                                                                                                                                                                                                                                                                                                                                                                                                                                                                                                                                                                                                                                                                                                                                                                                                                                                                                                                                                                                                                                                                                                                                                                                                                                                                                                         | 1.651019 | 1.932781 | 3.701447 | 3.629360 |   |   |      |          |  |  |  |  |     |          |          |  |  |  |      |          |          |          |  |  |     |          |          |          |          |  |      |          |          |          |          |          |      |          |          |          |          |          |      |          |          |          |          |          |      |          |          |          |          |          |     |          |          |          |          |          |      |          |          |          |          |          |  |   |   |   |   |    |      |          |  |  |  |  |      |          |          |  |  |  |      |          |          |          |  |  |     |          |          |          |          |  |      |          |          |          |          |          |
| 8 B                                                                                                                            | 3.508440                                                                                                                                                                                                                                                                                                                                                                                                                                                                                                                                                                                                                                                                                                                                                                                                                                                                                                                                                                                                                                                                                                                                                                                                                                                                                                                                                                                                                                                                                                                                                                                                                                                                                                                         | 1.804023 | 1.817438 | 2.956828 | 1.823675 |   |   |      |          |  |  |  |  |     |          |          |  |  |  |      |          |          |          |  |  |     |          |          |          |          |  |      |          |          |          |          |          |      |          |          |          |          |          |      |          |          |          |          |          |      |          |          |          |          |          |     |          |          |          |          |          |      |          |          |          |          |          |  |   |   |   |   |    |      |          |  |  |  |  |      |          |          |  |  |  |      |          |          |          |  |  |     |          |          |          |          |  |      |          |          |          |          |          |
| 9 B                                                                                                                            | 2.100715                                                                                                                                                                                                                                                                                                                                                                                                                                                                                                                                                                                                                                                                                                                                                                                                                                                                                                                                                                                                                                                                                                                                                                                                                                                                                                                                                                                                                                                                                                                                                                                                                                                                                                                         | 2.871626 | 1.798372 | 1.771358 | 1.740896 |   |   |      |          |  |  |  |  |     |          |          |  |  |  |      |          |          |          |  |  |     |          |          |          |          |  |      |          |          |          |          |          |      |          |          |          |          |          |      |          |          |          |          |          |      |          |          |          |          |          |     |          |          |          |          |          |      |          |          |          |          |          |  |   |   |   |   |    |      |          |  |  |  |  |      |          |          |  |  |  |      |          |          |          |  |  |     |          |          |          |          |  |      |          |          |          |          |          |
| 10 B                                                                                                                           | 2.141794                                                                                                                                                                                                                                                                                                                                                                                                                                                                                                                                                                                                                                                                                                                                                                                                                                                                                                                                                                                                                                                                                                                                                                                                                                                                                                                                                                                                                                                                                                                                                                                                                                                                                                                         | 1.881503 | 3.148686 | 1.850342 | 3.006685 |   |   |      |          |  |  |  |  |     |          |          |  |  |  |      |          |          |          |  |  |     |          |          |          |          |  |      |          |          |          |          |          |      |          |          |          |          |          |      |          |          |          |          |          |      |          |          |          |          |          |     |          |          |          |          |          |      |          |          |          |          |          |  |   |   |   |   |    |      |          |  |  |  |  |      |          |          |  |  |  |      |          |          |          |  |  |     |          |          |          |          |  |      |          |          |          |          |          |
|                                                                                                                                | 6                                                                                                                                                                                                                                                                                                                                                                                                                                                                                                                                                                                                                                                                                                                                                                                                                                                                                                                                                                                                                                                                                                                                                                                                                                                                                                                                                                                                                                                                                                                                                                                                                                                                                                                                | 7        | 8        | 9        | 10       |   |   |      |          |  |  |  |  |     |          |          |  |  |  |      |          |          |          |  |  |     |          |          |          |          |  |      |          |          |          |          |          |      |          |          |          |          |          |      |          |          |          |          |          |      |          |          |          |          |          |     |          |          |          |          |          |      |          |          |          |          |          |  |   |   |   |   |    |      |          |  |  |  |  |      |          |          |  |  |  |      |          |          |          |  |  |     |          |          |          |          |  |      |          |          |          |          |          |
| 6 Os                                                                                                                           | 0.000000                                                                                                                                                                                                                                                                                                                                                                                                                                                                                                                                                                                                                                                                                                                                                                                                                                                                                                                                                                                                                                                                                                                                                                                                                                                                                                                                                                                                                                                                                                                                                                                                                                                                                                                         |          |          |          |          |   |   |      |          |  |  |  |  |     |          |          |  |  |  |      |          |          |          |  |  |     |          |          |          |          |  |      |          |          |          |          |          |      |          |          |          |          |          |      |          |          |          |          |          |      |          |          |          |          |          |     |          |          |          |          |          |      |          |          |          |          |          |  |   |   |   |   |    |      |          |  |  |  |  |      |          |          |  |  |  |      |          |          |          |  |  |     |          |          |          |          |  |      |          |          |          |          |          |
| 7 B                                                                                                                            | 3.811848                                                                                                                                                                                                                                                                                                                                                                                                                                                                                                                                                                                                                                                                                                                                                                                                                                                                                                                                                                                                                                                                                                                                                                                                                                                                                                                                                                                                                                                                                                                                                                                                                                                                                                                         | 0.000000 |          |          |          |   |   |      |          |  |  |  |  |     |          |          |  |  |  |      |          |          |          |  |  |     |          |          |          |          |  |      |          |          |          |          |          |      |          |          |          |          |          |      |          |          |          |          |          |      |          |          |          |          |          |     |          |          |          |          |          |      |          |          |          |          |          |  |   |   |   |   |    |      |          |  |  |  |  |      |          |          |  |  |  |      |          |          |          |  |  |     |          |          |          |          |  |      |          |          |          |          |          |
| 8 B                                                                                                                            | 2.030053                                                                                                                                                                                                                                                                                                                                                                                                                                                                                                                                                                                                                                                                                                                                                                                                                                                                                                                                                                                                                                                                                                                                                                                                                                                                                                                                                                                                                                                                                                                                                                                                                                                                                                                         | 2.876421 | 0.000000 |          |          |   |   |      |          |  |  |  |  |     |          |          |  |  |  |      |          |          |          |  |  |     |          |          |          |          |  |      |          |          |          |          |          |      |          |          |          |          |          |      |          |          |          |          |          |      |          |          |          |          |          |     |          |          |          |          |          |      |          |          |          |          |          |  |   |   |   |   |    |      |          |  |  |  |  |      |          |          |  |  |  |      |          |          |          |  |  |     |          |          |          |          |  |      |          |          |          |          |          |
| 9 B                                                                                                                            | 3.420648                                                                                                                                                                                                                                                                                                                                                                                                                                                                                                                                                                                                                                                                                                                                                                                                                                                                                                                                                                                                                                                                                                                                                                                                                                                                                                                                                                                                                                                                                                                                                                                                                                                                                                                         | 3.177084 | 2.952385 | 0.000000 |          |   |   |      |          |  |  |  |  |     |          |          |  |  |  |      |          |          |          |  |  |     |          |          |          |          |  |      |          |          |          |          |          |      |          |          |          |          |          |      |          |          |          |          |          |      |          |          |          |          |          |     |          |          |          |          |          |      |          |          |          |          |          |  |   |   |   |   |    |      |          |  |  |  |  |      |          |          |  |  |  |      |          |          |          |  |  |     |          |          |          |          |  |      |          |          |          |          |          |
| 10 B                                                                                                                           | 2.079826                                                                                                                                                                                                                                                                                                                                                                                                                                                                                                                                                                                                                                                                                                                                                                                                                                                                                                                                                                                                                                                                                                                                                                                                                                                                                                                                                                                                                                                                                                                                                                                                                                                                                                                         | 3.052020 | 3.119996 | 3.012111 | 0.000000 |   |   |      |          |  |  |  |  |     |          |          |  |  |  |      |          |          |          |  |  |     |          |          |          |          |  |      |          |          |          |          |          |      |          |          |          |          |          |      |          |          |          |          |          |      |          |          |          |          |          |     |          |          |          |          |          |      |          |          |          |          |          |  |   |   |   |   |    |      |          |  |  |  |  |      |          |          |  |  |  |      |          |          |          |  |  |     |          |          |          |          |  |      |          |          |          |          |          |

Table S8C. Energy ranking of the  $\text{Cp}_2\text{Os}_2\text{B}_8\text{H}_8$  structures

| No | Initial structure        | Final energy (a.u.) | D kcal/mole |
|----|--------------------------|---------------------|-------------|
| 1  | 2-Os-TetrcTriPri2_d      | -772.32049989       | 0.00        |
| 2  | 2-Os-TetrcTriPri2_c      | -772.32049987       | 0.00        |
| 3  | 1-Os-TetrcTriPri1-e      | -772.32047902       | 0.01        |
| 4  | 7-Os-Isocloso-i          | -772.32047902       | 0.01        |
| 5  | 1-Os-TetrcTriPri1-i      | -772.30897769       | 7.23        |
| 6  | 5-Os-PentagPrism-b       | -772.30445470       | 10.07       |
| 7  | 1-Os-TetrcTriPri1-l      | -772.29616981       | 15.27       |
| 8  | 2-Os-TetrcTriPri2_b      | -772.29616981       | 15.27       |
| 9  | 2-Os-TetrcTriPri2_f      | -772.29616981       | 15.27       |
| 10 | 5-Os-PentagPrism-d       | -772.29616981       | 15.27       |
| 11 | 7-Os-Isocloso-c          | -772.29616981       | 15.27       |
| 12 | 8-Os-Structure-2         | -772.29616981       | 15.27       |
| 13 | 6-Os-AntiPr-d            | -772.29616980       | 15.27       |
| 14 | 3-Os-BicapCub_g          | -772.29041583       | 18.88       |
| 15 | 6-Os-AntiPr-c            | -772.29041583       | 18.88       |
| 16 | 3-Os-BicapCub_b          | -772.28157680       | 24.42       |
| 17 | 4-Os-BicapSqAntipr-f     | -772.28138188       | 24.55       |
| 18 | 7-Os-Isocloso-l-238      | -772.28137536       | 24.55       |
| 19 | 2-Os-TetrcTriPri2_a      | -772.28137535       | 24.55       |
| 20 | 7-Os-Isocloso-j          | -772.28137534       | 24.55       |
| 21 | 7-Os-Isocloso-b_r-22     | -772.27815302       | 26.57       |
| 22 | 7-Os-Isocloso-b i-22     | -772.27811343       | 26.60       |
| 23 | 3-Os-BicapCub_c          | -772.27589175       | 27.99       |
| 24 | 1-Os-TetrcTriPri1-k      | -772.27392349       | 29.23       |
| 25 | 2-Os-TetrcTriPri2_h      | -772.27392348       | 29.23       |
| 26 | 6-Os-AntiPr-e            | -772.27392348       | 29.23       |
| 27 | 7-Os-Isocloso-k          | -772.26995959       | 31.71       |
| 28 | 1-Os-TetrcTriPri1-j      | -772.26995956       | 31.71       |
| 29 | 1-Os-TetrcTriPri1-h      | -772.26855865       | 32.59       |
| 30 | 1-Os-TetrcTriPri1-o      | -772.26663111       | 33.80       |
| 31 | 5-Os-PentagPrism-c       | -772.26663111       | 33.80       |
| 32 | 1-Os-TetrcTriPri1-f      | -772.26615530       | 34.10       |
| 33 | 3-Os-BicapCub_h          | -772.26542659       | 34.56       |
| 34 | 1-Os-TetrcTriPri1-n      | -772.26239897       | 36.46       |
| 35 | 2-Os-TetrcTriPri2_g_r-88 | -772.26226078       | 36.55       |
| 36 | 2-Os-TetrcTriPri2_g_r-29 | -772.26226077       | 36.55       |
| 37 | 5-Os-PentagPrism-e       | -772.26075906       | 37.49       |
| 38 | 1-Os-TetrcTriPri1-g      | -772.26075905       | 37.49       |
| 39 | 2-Os-TetrcTriPri2_g imag | -772.26001821       | 37.95       |
| 40 | 6-Os-AntiPr-b            | -772.25243114       | 42.71       |
| 41 | 3-Os-BicapCub_e          | -772.25163552       | 43.21       |



|    |                           |               |       |
|----|---------------------------|---------------|-------|
| 42 | 1-Os-TetrTriPri1-m        | -772.25087581 | 43.69 |
| 43 | 7-Os-Isocloso-g           | -772.25087581 | 43.69 |
| 44 | 4-Os-BicapSqAntipr-d      | -772.25087580 | 43.69 |
| 45 | 5-Os-PentagPrism-a        | -772.25005962 | 44.20 |
| 46 | 7-Os-Isocloso-h           | -772.24959391 | 44.49 |
| 47 | 4-Os-BicapSqAntipr-g      | -772.24959361 | 44.49 |
| 48 | 7-Os-Isocloso-a           | -772.24574050 | 46.91 |
| 49 | 4-Os-BicapSqAntipr-b      | -772.24298497 | 48.64 |
| 50 | 4-Os-BicapSqAntipr-a      | -772.24285236 | 48.72 |
| 51 | 7-Os-Isocloso-e           | -772.24285236 | 48.72 |
| 52 | 1-Os-TetrTriPri1-d        | -772.24196118 | 49.28 |
| 53 | 1-Os-TetrTriPri1-p        | -772.24188186 | 49.33 |
| 54 | 4-Os-BicapSqAntipr-e_r-31 | -772.23533589 | 53.44 |
| 55 | 7-Os-Isocloso-d           | -772.23533587 | 53.44 |
| 56 | 4-Os-BicapSqAntipr-e i-31 | -772.23502672 | 53.63 |
| 57 | 7-Os-Isocloso-f           | -772.23226845 | 55.37 |
| 58 | 1-Os-TetrTriPri1-b        | -772.23160269 | 55.78 |
| 59 | 7-Os-Isocloso-l i-238     | -772.23112878 | 56.08 |
| 60 | 2-Os-TetrTriPri2_i_r-323  | -772.22714054 | 58.58 |
| 61 | 2-Os-TetrTriPri2_i i-323  | -772.22489004 | 60.00 |
| 62 | 2-Os-TetrTriPri2_e        | -772.22034531 | 62.85 |
| 63 | 3-Os-BicapCub_d           | -772.21745873 | 64.66 |
| 64 | 6-Os-AntiPr-a             | -772.21745873 | 64.66 |
| 65 | 1-Os-TetrTriPri1-c        | -772.20846353 | 70.30 |
| 66 | 3-Os-BicapCub_a           | -772.20844644 | 70.31 |
| 67 | 3-Os-BicapCub_f           | -772.19718997 | 77.38 |
| 68 | 1-Os-TetrTriPri1-a        | -772.17138095 | 93.57 |
| 69 | 8-Os-Bipypr-octag         | -772.16919231 | 94.95 |

## The 11-vertex $\text{Cp}_2\text{Os}_2\text{B}_9\text{H}_9$ Structures

Table S9A. Initial structures

Table S9B. Lowest energy structure distances

Table S9C. Global ranking of all structures

Table S9A. Initial structures (one example from each family); 89 structures in total

| <b>Initial structures</b>                                                                                                                                                          |                                                                                                                                                                                                        |
|------------------------------------------------------------------------------------------------------------------------------------------------------------------------------------|--------------------------------------------------------------------------------------------------------------------------------------------------------------------------------------------------------|
| 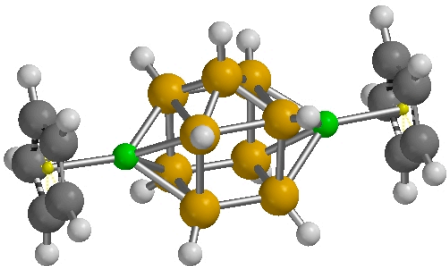 <p data-bbox="256 976 690 1008">2a. Tricapped cubeA (<math>C_{2v}</math>) 18 structures</p>      |  <p data-bbox="933 987 1364 1018">2b. Tricapped cubeA (<math>C_{3v}</math>) 16 structures</p>                        |
|  <p data-bbox="154 1423 787 1455">3. Octahedron fused to pentagonal bipyramid 24 structures</p> |  <p data-bbox="852 1375 1445 1438">4. Edge-coalesced icosahedrons (icosahedron without a vertex) 20 structures</p> |

Table S9B. Distance table for the lowest energy  $\text{Cp}_2\text{Os}_2\text{B}_9\text{H}_9$  structures

| 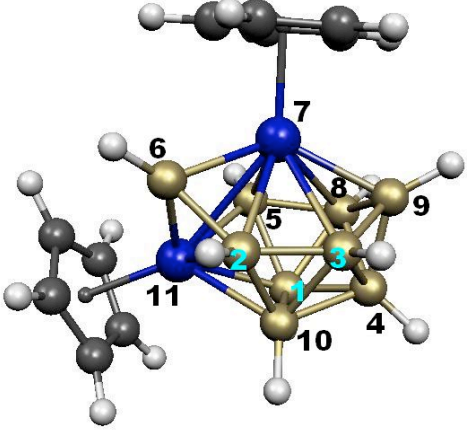 <p>1. -797.79225403 0.0</p>                      | <table border="1"> <thead> <tr> <th></th> <th>1</th> <th>2</th> <th>3</th> <th>4</th> <th>5</th> </tr> </thead> <tbody> <tr><td>1 B</td><td>0.000000</td><td></td><td></td><td></td><td></td></tr> <tr><td>2 B</td><td>2.994072</td><td>0.000000</td><td></td><td></td><td></td></tr> <tr><td>3 B</td><td>2.896575</td><td>1.697437</td><td>0.000000</td><td></td><td></td></tr> <tr><td>4 B</td><td>1.796363</td><td>2.918105</td><td>1.822923</td><td>0.000000</td><td></td></tr> <tr><td>5 B</td><td>1.822460</td><td>3.221450</td><td>3.460962</td><td>2.987464</td><td>0.000000</td></tr> <tr><td>6 B</td><td>3.733388</td><td>1.754645</td><td>3.171762</td><td>4.202267</td><td>3.082872</td></tr> <tr><td>7 Os</td><td>3.146540</td><td>2.326175</td><td>2.412248</td><td>3.129331</td><td>2.249189</td></tr> <tr><td>8 B</td><td>1.780856</td><td>3.430883</td><td>2.766440</td><td>1.804429</td><td>1.748637</td></tr> <tr><td>9 B</td><td>2.874722</td><td>3.038196</td><td>1.724546</td><td>1.704058</td><td>3.053342</td></tr> <tr><td>10 B</td><td>1.808029</td><td>1.762310</td><td>1.876235</td><td>1.825598</td><td>3.016609</td></tr> <tr><td>11 Os</td><td>2.255573</td><td>2.184340</td><td>3.332946</td><td>3.455081</td><td>2.114265</td></tr> <tr> <td></td> <td>6</td> <td>7</td> <td>8</td> <td>9</td> <td>10</td> </tr> <tr><td>6 B</td><td>0.000000</td><td></td><td></td><td></td><td></td></tr> <tr><td>7 Os</td><td>2.168258</td><td>0.000000</td><td></td><td></td><td></td></tr> <tr><td>8 B</td><td>3.983528</td><td>2.401159</td><td>0.000000</td><td></td><td></td></tr> <tr><td>9 B</td><td>3.961334</td><td>2.208387</td><td>1.716429</td><td>0.000000</td><td></td></tr> <tr><td>10 B</td><td>3.173302</td><td>3.180606</td><td>2.880256</td><td>2.926917</td><td>0.000000</td></tr> <tr><td>11 Os</td><td>2.040719</td><td>2.866035</td><td>3.284380</td><td>3.961704</td><td>2.243622</td></tr> </tbody> </table> |          | 1        | 2        | 3        | 4 | 5 | 1 B | 0.000000 |  |  |  |  | 2 B | 2.994072 | 0.000000 |  |  |  | 3 B | 2.896575 | 1.697437 | 0.000000 |  |  | 4 B | 1.796363 | 2.918105 | 1.822923 | 0.000000 |  | 5 B | 1.822460 | 3.221450 | 3.460962 | 2.987464 | 0.000000 | 6 B  | 3.733388 | 1.754645 | 3.171762 | 4.202267 | 3.082872 | 7 Os | 3.146540 | 2.326175 | 2.412248 | 3.129331 | 2.249189 | 8 B  | 1.780856 | 3.430883 | 2.766440 | 1.804429 | 1.748637 | 9 B | 2.874722 | 3.038196 | 1.724546 | 1.704058 | 3.053342 | 10 B  | 1.808029 | 1.762310 | 1.876235 | 1.825598 | 3.016609 | 11 Os | 2.255573 | 2.184340 | 3.332946 | 3.455081 | 2.114265 |  | 6 | 7 | 8 | 9 | 10 | 6 B  | 0.000000 |  |  |  |  | 7 Os | 2.168258 | 0.000000 |  |  |  | 8 B  | 3.983528 | 2.401159 | 0.000000 |  |  | 9 B | 3.961334 | 2.208387 | 1.716429 | 0.000000 |  | 10 B  | 3.173302 | 3.180606 | 2.880256 | 2.926917 | 0.000000 | 11 Os | 2.040719 | 2.866035 | 3.284380 | 3.961704 | 2.243622 |
|------------------------------------------------------------------------------------------------------------------------------------|-----------------------------------------------------------------------------------------------------------------------------------------------------------------------------------------------------------------------------------------------------------------------------------------------------------------------------------------------------------------------------------------------------------------------------------------------------------------------------------------------------------------------------------------------------------------------------------------------------------------------------------------------------------------------------------------------------------------------------------------------------------------------------------------------------------------------------------------------------------------------------------------------------------------------------------------------------------------------------------------------------------------------------------------------------------------------------------------------------------------------------------------------------------------------------------------------------------------------------------------------------------------------------------------------------------------------------------------------------------------------------------------------------------------------------------------------------------------------------------------------------------------------------------------------------------------------------------------------------------------------------------------------------------------------------------------------------------------------------------------------------------------------------------------------------------------------------------------------------------------------------------------------------------------------------------------------------------|----------|----------|----------|----------|---|---|-----|----------|--|--|--|--|-----|----------|----------|--|--|--|-----|----------|----------|----------|--|--|-----|----------|----------|----------|----------|--|-----|----------|----------|----------|----------|----------|------|----------|----------|----------|----------|----------|------|----------|----------|----------|----------|----------|------|----------|----------|----------|----------|----------|-----|----------|----------|----------|----------|----------|-------|----------|----------|----------|----------|----------|-------|----------|----------|----------|----------|----------|--|---|---|---|---|----|------|----------|--|--|--|--|------|----------|----------|--|--|--|------|----------|----------|----------|--|--|-----|----------|----------|----------|----------|--|-------|----------|----------|----------|----------|----------|-------|----------|----------|----------|----------|----------|
|                                                                                                                                    | 1                                                                                                                                                                                                                                                                                                                                                                                                                                                                                                                                                                                                                                                                                                                                                                                                                                                                                                                                                                                                                                                                                                                                                                                                                                                                                                                                                                                                                                                                                                                                                                                                                                                                                                                                                                                                                                                                                                                                                         | 2        | 3        | 4        | 5        |   |   |     |          |  |  |  |  |     |          |          |  |  |  |     |          |          |          |  |  |     |          |          |          |          |  |     |          |          |          |          |          |      |          |          |          |          |          |      |          |          |          |          |          |      |          |          |          |          |          |     |          |          |          |          |          |       |          |          |          |          |          |       |          |          |          |          |          |  |   |   |   |   |    |      |          |  |  |  |  |      |          |          |  |  |  |      |          |          |          |  |  |     |          |          |          |          |  |       |          |          |          |          |          |       |          |          |          |          |          |
| 1 B                                                                                                                                | 0.000000                                                                                                                                                                                                                                                                                                                                                                                                                                                                                                                                                                                                                                                                                                                                                                                                                                                                                                                                                                                                                                                                                                                                                                                                                                                                                                                                                                                                                                                                                                                                                                                                                                                                                                                                                                                                                                                                                                                                                  |          |          |          |          |   |   |     |          |  |  |  |  |     |          |          |  |  |  |     |          |          |          |  |  |     |          |          |          |          |  |     |          |          |          |          |          |      |          |          |          |          |          |      |          |          |          |          |          |      |          |          |          |          |          |     |          |          |          |          |          |       |          |          |          |          |          |       |          |          |          |          |          |  |   |   |   |   |    |      |          |  |  |  |  |      |          |          |  |  |  |      |          |          |          |  |  |     |          |          |          |          |  |       |          |          |          |          |          |       |          |          |          |          |          |
| 2 B                                                                                                                                | 2.994072                                                                                                                                                                                                                                                                                                                                                                                                                                                                                                                                                                                                                                                                                                                                                                                                                                                                                                                                                                                                                                                                                                                                                                                                                                                                                                                                                                                                                                                                                                                                                                                                                                                                                                                                                                                                                                                                                                                                                  | 0.000000 |          |          |          |   |   |     |          |  |  |  |  |     |          |          |  |  |  |     |          |          |          |  |  |     |          |          |          |          |  |     |          |          |          |          |          |      |          |          |          |          |          |      |          |          |          |          |          |      |          |          |          |          |          |     |          |          |          |          |          |       |          |          |          |          |          |       |          |          |          |          |          |  |   |   |   |   |    |      |          |  |  |  |  |      |          |          |  |  |  |      |          |          |          |  |  |     |          |          |          |          |  |       |          |          |          |          |          |       |          |          |          |          |          |
| 3 B                                                                                                                                | 2.896575                                                                                                                                                                                                                                                                                                                                                                                                                                                                                                                                                                                                                                                                                                                                                                                                                                                                                                                                                                                                                                                                                                                                                                                                                                                                                                                                                                                                                                                                                                                                                                                                                                                                                                                                                                                                                                                                                                                                                  | 1.697437 | 0.000000 |          |          |   |   |     |          |  |  |  |  |     |          |          |  |  |  |     |          |          |          |  |  |     |          |          |          |          |  |     |          |          |          |          |          |      |          |          |          |          |          |      |          |          |          |          |          |      |          |          |          |          |          |     |          |          |          |          |          |       |          |          |          |          |          |       |          |          |          |          |          |  |   |   |   |   |    |      |          |  |  |  |  |      |          |          |  |  |  |      |          |          |          |  |  |     |          |          |          |          |  |       |          |          |          |          |          |       |          |          |          |          |          |
| 4 B                                                                                                                                | 1.796363                                                                                                                                                                                                                                                                                                                                                                                                                                                                                                                                                                                                                                                                                                                                                                                                                                                                                                                                                                                                                                                                                                                                                                                                                                                                                                                                                                                                                                                                                                                                                                                                                                                                                                                                                                                                                                                                                                                                                  | 2.918105 | 1.822923 | 0.000000 |          |   |   |     |          |  |  |  |  |     |          |          |  |  |  |     |          |          |          |  |  |     |          |          |          |          |  |     |          |          |          |          |          |      |          |          |          |          |          |      |          |          |          |          |          |      |          |          |          |          |          |     |          |          |          |          |          |       |          |          |          |          |          |       |          |          |          |          |          |  |   |   |   |   |    |      |          |  |  |  |  |      |          |          |  |  |  |      |          |          |          |  |  |     |          |          |          |          |  |       |          |          |          |          |          |       |          |          |          |          |          |
| 5 B                                                                                                                                | 1.822460                                                                                                                                                                                                                                                                                                                                                                                                                                                                                                                                                                                                                                                                                                                                                                                                                                                                                                                                                                                                                                                                                                                                                                                                                                                                                                                                                                                                                                                                                                                                                                                                                                                                                                                                                                                                                                                                                                                                                  | 3.221450 | 3.460962 | 2.987464 | 0.000000 |   |   |     |          |  |  |  |  |     |          |          |  |  |  |     |          |          |          |  |  |     |          |          |          |          |  |     |          |          |          |          |          |      |          |          |          |          |          |      |          |          |          |          |          |      |          |          |          |          |          |     |          |          |          |          |          |       |          |          |          |          |          |       |          |          |          |          |          |  |   |   |   |   |    |      |          |  |  |  |  |      |          |          |  |  |  |      |          |          |          |  |  |     |          |          |          |          |  |       |          |          |          |          |          |       |          |          |          |          |          |
| 6 B                                                                                                                                | 3.733388                                                                                                                                                                                                                                                                                                                                                                                                                                                                                                                                                                                                                                                                                                                                                                                                                                                                                                                                                                                                                                                                                                                                                                                                                                                                                                                                                                                                                                                                                                                                                                                                                                                                                                                                                                                                                                                                                                                                                  | 1.754645 | 3.171762 | 4.202267 | 3.082872 |   |   |     |          |  |  |  |  |     |          |          |  |  |  |     |          |          |          |  |  |     |          |          |          |          |  |     |          |          |          |          |          |      |          |          |          |          |          |      |          |          |          |          |          |      |          |          |          |          |          |     |          |          |          |          |          |       |          |          |          |          |          |       |          |          |          |          |          |  |   |   |   |   |    |      |          |  |  |  |  |      |          |          |  |  |  |      |          |          |          |  |  |     |          |          |          |          |  |       |          |          |          |          |          |       |          |          |          |          |          |
| 7 Os                                                                                                                               | 3.146540                                                                                                                                                                                                                                                                                                                                                                                                                                                                                                                                                                                                                                                                                                                                                                                                                                                                                                                                                                                                                                                                                                                                                                                                                                                                                                                                                                                                                                                                                                                                                                                                                                                                                                                                                                                                                                                                                                                                                  | 2.326175 | 2.412248 | 3.129331 | 2.249189 |   |   |     |          |  |  |  |  |     |          |          |  |  |  |     |          |          |          |  |  |     |          |          |          |          |  |     |          |          |          |          |          |      |          |          |          |          |          |      |          |          |          |          |          |      |          |          |          |          |          |     |          |          |          |          |          |       |          |          |          |          |          |       |          |          |          |          |          |  |   |   |   |   |    |      |          |  |  |  |  |      |          |          |  |  |  |      |          |          |          |  |  |     |          |          |          |          |  |       |          |          |          |          |          |       |          |          |          |          |          |
| 8 B                                                                                                                                | 1.780856                                                                                                                                                                                                                                                                                                                                                                                                                                                                                                                                                                                                                                                                                                                                                                                                                                                                                                                                                                                                                                                                                                                                                                                                                                                                                                                                                                                                                                                                                                                                                                                                                                                                                                                                                                                                                                                                                                                                                  | 3.430883 | 2.766440 | 1.804429 | 1.748637 |   |   |     |          |  |  |  |  |     |          |          |  |  |  |     |          |          |          |  |  |     |          |          |          |          |  |     |          |          |          |          |          |      |          |          |          |          |          |      |          |          |          |          |          |      |          |          |          |          |          |     |          |          |          |          |          |       |          |          |          |          |          |       |          |          |          |          |          |  |   |   |   |   |    |      |          |  |  |  |  |      |          |          |  |  |  |      |          |          |          |  |  |     |          |          |          |          |  |       |          |          |          |          |          |       |          |          |          |          |          |
| 9 B                                                                                                                                | 2.874722                                                                                                                                                                                                                                                                                                                                                                                                                                                                                                                                                                                                                                                                                                                                                                                                                                                                                                                                                                                                                                                                                                                                                                                                                                                                                                                                                                                                                                                                                                                                                                                                                                                                                                                                                                                                                                                                                                                                                  | 3.038196 | 1.724546 | 1.704058 | 3.053342 |   |   |     |          |  |  |  |  |     |          |          |  |  |  |     |          |          |          |  |  |     |          |          |          |          |  |     |          |          |          |          |          |      |          |          |          |          |          |      |          |          |          |          |          |      |          |          |          |          |          |     |          |          |          |          |          |       |          |          |          |          |          |       |          |          |          |          |          |  |   |   |   |   |    |      |          |  |  |  |  |      |          |          |  |  |  |      |          |          |          |  |  |     |          |          |          |          |  |       |          |          |          |          |          |       |          |          |          |          |          |
| 10 B                                                                                                                               | 1.808029                                                                                                                                                                                                                                                                                                                                                                                                                                                                                                                                                                                                                                                                                                                                                                                                                                                                                                                                                                                                                                                                                                                                                                                                                                                                                                                                                                                                                                                                                                                                                                                                                                                                                                                                                                                                                                                                                                                                                  | 1.762310 | 1.876235 | 1.825598 | 3.016609 |   |   |     |          |  |  |  |  |     |          |          |  |  |  |     |          |          |          |  |  |     |          |          |          |          |  |     |          |          |          |          |          |      |          |          |          |          |          |      |          |          |          |          |          |      |          |          |          |          |          |     |          |          |          |          |          |       |          |          |          |          |          |       |          |          |          |          |          |  |   |   |   |   |    |      |          |  |  |  |  |      |          |          |  |  |  |      |          |          |          |  |  |     |          |          |          |          |  |       |          |          |          |          |          |       |          |          |          |          |          |
| 11 Os                                                                                                                              | 2.255573                                                                                                                                                                                                                                                                                                                                                                                                                                                                                                                                                                                                                                                                                                                                                                                                                                                                                                                                                                                                                                                                                                                                                                                                                                                                                                                                                                                                                                                                                                                                                                                                                                                                                                                                                                                                                                                                                                                                                  | 2.184340 | 3.332946 | 3.455081 | 2.114265 |   |   |     |          |  |  |  |  |     |          |          |  |  |  |     |          |          |          |  |  |     |          |          |          |          |  |     |          |          |          |          |          |      |          |          |          |          |          |      |          |          |          |          |          |      |          |          |          |          |          |     |          |          |          |          |          |       |          |          |          |          |          |       |          |          |          |          |          |  |   |   |   |   |    |      |          |  |  |  |  |      |          |          |  |  |  |      |          |          |          |  |  |     |          |          |          |          |  |       |          |          |          |          |          |       |          |          |          |          |          |
|                                                                                                                                    | 6                                                                                                                                                                                                                                                                                                                                                                                                                                                                                                                                                                                                                                                                                                                                                                                                                                                                                                                                                                                                                                                                                                                                                                                                                                                                                                                                                                                                                                                                                                                                                                                                                                                                                                                                                                                                                                                                                                                                                         | 7        | 8        | 9        | 10       |   |   |     |          |  |  |  |  |     |          |          |  |  |  |     |          |          |          |  |  |     |          |          |          |          |  |     |          |          |          |          |          |      |          |          |          |          |          |      |          |          |          |          |          |      |          |          |          |          |          |     |          |          |          |          |          |       |          |          |          |          |          |       |          |          |          |          |          |  |   |   |   |   |    |      |          |  |  |  |  |      |          |          |  |  |  |      |          |          |          |  |  |     |          |          |          |          |  |       |          |          |          |          |          |       |          |          |          |          |          |
| 6 B                                                                                                                                | 0.000000                                                                                                                                                                                                                                                                                                                                                                                                                                                                                                                                                                                                                                                                                                                                                                                                                                                                                                                                                                                                                                                                                                                                                                                                                                                                                                                                                                                                                                                                                                                                                                                                                                                                                                                                                                                                                                                                                                                                                  |          |          |          |          |   |   |     |          |  |  |  |  |     |          |          |  |  |  |     |          |          |          |  |  |     |          |          |          |          |  |     |          |          |          |          |          |      |          |          |          |          |          |      |          |          |          |          |          |      |          |          |          |          |          |     |          |          |          |          |          |       |          |          |          |          |          |       |          |          |          |          |          |  |   |   |   |   |    |      |          |  |  |  |  |      |          |          |  |  |  |      |          |          |          |  |  |     |          |          |          |          |  |       |          |          |          |          |          |       |          |          |          |          |          |
| 7 Os                                                                                                                               | 2.168258                                                                                                                                                                                                                                                                                                                                                                                                                                                                                                                                                                                                                                                                                                                                                                                                                                                                                                                                                                                                                                                                                                                                                                                                                                                                                                                                                                                                                                                                                                                                                                                                                                                                                                                                                                                                                                                                                                                                                  | 0.000000 |          |          |          |   |   |     |          |  |  |  |  |     |          |          |  |  |  |     |          |          |          |  |  |     |          |          |          |          |  |     |          |          |          |          |          |      |          |          |          |          |          |      |          |          |          |          |          |      |          |          |          |          |          |     |          |          |          |          |          |       |          |          |          |          |          |       |          |          |          |          |          |  |   |   |   |   |    |      |          |  |  |  |  |      |          |          |  |  |  |      |          |          |          |  |  |     |          |          |          |          |  |       |          |          |          |          |          |       |          |          |          |          |          |
| 8 B                                                                                                                                | 3.983528                                                                                                                                                                                                                                                                                                                                                                                                                                                                                                                                                                                                                                                                                                                                                                                                                                                                                                                                                                                                                                                                                                                                                                                                                                                                                                                                                                                                                                                                                                                                                                                                                                                                                                                                                                                                                                                                                                                                                  | 2.401159 | 0.000000 |          |          |   |   |     |          |  |  |  |  |     |          |          |  |  |  |     |          |          |          |  |  |     |          |          |          |          |  |     |          |          |          |          |          |      |          |          |          |          |          |      |          |          |          |          |          |      |          |          |          |          |          |     |          |          |          |          |          |       |          |          |          |          |          |       |          |          |          |          |          |  |   |   |   |   |    |      |          |  |  |  |  |      |          |          |  |  |  |      |          |          |          |  |  |     |          |          |          |          |  |       |          |          |          |          |          |       |          |          |          |          |          |
| 9 B                                                                                                                                | 3.961334                                                                                                                                                                                                                                                                                                                                                                                                                                                                                                                                                                                                                                                                                                                                                                                                                                                                                                                                                                                                                                                                                                                                                                                                                                                                                                                                                                                                                                                                                                                                                                                                                                                                                                                                                                                                                                                                                                                                                  | 2.208387 | 1.716429 | 0.000000 |          |   |   |     |          |  |  |  |  |     |          |          |  |  |  |     |          |          |          |  |  |     |          |          |          |          |  |     |          |          |          |          |          |      |          |          |          |          |          |      |          |          |          |          |          |      |          |          |          |          |          |     |          |          |          |          |          |       |          |          |          |          |          |       |          |          |          |          |          |  |   |   |   |   |    |      |          |  |  |  |  |      |          |          |  |  |  |      |          |          |          |  |  |     |          |          |          |          |  |       |          |          |          |          |          |       |          |          |          |          |          |
| 10 B                                                                                                                               | 3.173302                                                                                                                                                                                                                                                                                                                                                                                                                                                                                                                                                                                                                                                                                                                                                                                                                                                                                                                                                                                                                                                                                                                                                                                                                                                                                                                                                                                                                                                                                                                                                                                                                                                                                                                                                                                                                                                                                                                                                  | 3.180606 | 2.880256 | 2.926917 | 0.000000 |   |   |     |          |  |  |  |  |     |          |          |  |  |  |     |          |          |          |  |  |     |          |          |          |          |  |     |          |          |          |          |          |      |          |          |          |          |          |      |          |          |          |          |          |      |          |          |          |          |          |     |          |          |          |          |          |       |          |          |          |          |          |       |          |          |          |          |          |  |   |   |   |   |    |      |          |  |  |  |  |      |          |          |  |  |  |      |          |          |          |  |  |     |          |          |          |          |  |       |          |          |          |          |          |       |          |          |          |          |          |
| 11 Os                                                                                                                              | 2.040719                                                                                                                                                                                                                                                                                                                                                                                                                                                                                                                                                                                                                                                                                                                                                                                                                                                                                                                                                                                                                                                                                                                                                                                                                                                                                                                                                                                                                                                                                                                                                                                                                                                                                                                                                                                                                                                                                                                                                  | 2.866035 | 3.284380 | 3.961704 | 2.243622 |   |   |     |          |  |  |  |  |     |          |          |  |  |  |     |          |          |          |  |  |     |          |          |          |          |  |     |          |          |          |          |          |      |          |          |          |          |          |      |          |          |          |          |          |      |          |          |          |          |          |     |          |          |          |          |          |       |          |          |          |          |          |       |          |          |          |          |          |  |   |   |   |   |    |      |          |  |  |  |  |      |          |          |  |  |  |      |          |          |          |  |  |     |          |          |          |          |  |       |          |          |          |          |          |       |          |          |          |          |          |
|  <p>2. -797.77348532 +11.8 <math>C_s</math></p>  | <table border="1"> <thead> <tr> <th></th> <th>1</th> <th>2</th> <th>3</th> <th>4</th> <th>5</th> </tr> </thead> <tbody> <tr><td>1 B</td><td>0.000000</td><td></td><td></td><td></td><td></td></tr> <tr><td>2 B</td><td>2.759032</td><td>0.000000</td><td></td><td></td><td></td></tr> <tr><td>3 B</td><td>1.782476</td><td>1.814011</td><td>0.000000</td><td></td><td></td></tr> <tr><td>4 B</td><td>3.432285</td><td>1.807185</td><td>3.052580</td><td>0.000000</td><td></td></tr> <tr><td>5 B</td><td>3.591521</td><td>3.426340</td><td>2.961000</td><td>3.024180</td><td>0.000000</td></tr> <tr><td>6 B</td><td>1.789427</td><td>3.438711</td><td>3.008732</td><td>3.106204</td><td>3.197421</td></tr> <tr><td>7 B</td><td>1.735130</td><td>1.738236</td><td>1.714646</td><td>3.066348</td><td>4.263594</td></tr> <tr><td>8 Os</td><td>3.326730</td><td>3.339583</td><td>3.499461</td><td>2.141026</td><td>2.048721</td></tr> <tr><td>9 B</td><td>1.789696</td><td>2.923392</td><td>1.845956</td><td>3.091802</td><td>1.897302</td></tr> <tr><td>10 Os</td><td>2.340759</td><td>2.351233</td><td>3.042324</td><td>2.150402</td><td>4.140612</td></tr> <tr><td>11 B</td><td>2.814920</td><td>1.741408</td><td>1.814597</td><td>1.835256</td><td>1.692844</td></tr> <tr> <td></td> <td>6</td> <td>7</td> <td>8</td> <td>9</td> <td>10</td> </tr> <tr><td>6 B</td><td>0.000000</td><td></td><td></td><td></td><td></td></tr> <tr><td>7 B</td><td>3.070835</td><td>0.000000</td><td></td><td></td><td></td></tr> <tr><td>8 Os</td><td>2.118272</td><td>4.009880</td><td>0.000000</td><td></td><td></td></tr> <tr><td>9 B</td><td>1.845836</td><td>2.935699</td><td>2.290707</td><td>0.000000</td><td></td></tr> <tr><td>10 Os</td><td>2.181789</td><td>2.124648</td><td>2.881041</td><td>3.108353</td><td>0.000000</td></tr> <tr><td>11 B</td><td>2.957564</td><td>2.849015</td><td>2.233171</td><td>1.857204</td><td>2.997591</td></tr> </tbody> </table> |          | 1        | 2        | 3        | 4 | 5 | 1 B | 0.000000 |  |  |  |  | 2 B | 2.759032 | 0.000000 |  |  |  | 3 B | 1.782476 | 1.814011 | 0.000000 |  |  | 4 B | 3.432285 | 1.807185 | 3.052580 | 0.000000 |  | 5 B | 3.591521 | 3.426340 | 2.961000 | 3.024180 | 0.000000 | 6 B  | 1.789427 | 3.438711 | 3.008732 | 3.106204 | 3.197421 | 7 B  | 1.735130 | 1.738236 | 1.714646 | 3.066348 | 4.263594 | 8 Os | 3.326730 | 3.339583 | 3.499461 | 2.141026 | 2.048721 | 9 B | 1.789696 | 2.923392 | 1.845956 | 3.091802 | 1.897302 | 10 Os | 2.340759 | 2.351233 | 3.042324 | 2.150402 | 4.140612 | 11 B  | 2.814920 | 1.741408 | 1.814597 | 1.835256 | 1.692844 |  | 6 | 7 | 8 | 9 | 10 | 6 B  | 0.000000 |  |  |  |  | 7 B  | 3.070835 | 0.000000 |  |  |  | 8 Os | 2.118272 | 4.009880 | 0.000000 |  |  | 9 B | 1.845836 | 2.935699 | 2.290707 | 0.000000 |  | 10 Os | 2.181789 | 2.124648 | 2.881041 | 3.108353 | 0.000000 | 11 B  | 2.957564 | 2.849015 | 2.233171 | 1.857204 | 2.997591 |
|                                                                                                                                    | 1                                                                                                                                                                                                                                                                                                                                                                                                                                                                                                                                                                                                                                                                                                                                                                                                                                                                                                                                                                                                                                                                                                                                                                                                                                                                                                                                                                                                                                                                                                                                                                                                                                                                                                                                                                                                                                                                                                                                                         | 2        | 3        | 4        | 5        |   |   |     |          |  |  |  |  |     |          |          |  |  |  |     |          |          |          |  |  |     |          |          |          |          |  |     |          |          |          |          |          |      |          |          |          |          |          |      |          |          |          |          |          |      |          |          |          |          |          |     |          |          |          |          |          |       |          |          |          |          |          |       |          |          |          |          |          |  |   |   |   |   |    |      |          |  |  |  |  |      |          |          |  |  |  |      |          |          |          |  |  |     |          |          |          |          |  |       |          |          |          |          |          |       |          |          |          |          |          |
| 1 B                                                                                                                                | 0.000000                                                                                                                                                                                                                                                                                                                                                                                                                                                                                                                                                                                                                                                                                                                                                                                                                                                                                                                                                                                                                                                                                                                                                                                                                                                                                                                                                                                                                                                                                                                                                                                                                                                                                                                                                                                                                                                                                                                                                  |          |          |          |          |   |   |     |          |  |  |  |  |     |          |          |  |  |  |     |          |          |          |  |  |     |          |          |          |          |  |     |          |          |          |          |          |      |          |          |          |          |          |      |          |          |          |          |          |      |          |          |          |          |          |     |          |          |          |          |          |       |          |          |          |          |          |       |          |          |          |          |          |  |   |   |   |   |    |      |          |  |  |  |  |      |          |          |  |  |  |      |          |          |          |  |  |     |          |          |          |          |  |       |          |          |          |          |          |       |          |          |          |          |          |
| 2 B                                                                                                                                | 2.759032                                                                                                                                                                                                                                                                                                                                                                                                                                                                                                                                                                                                                                                                                                                                                                                                                                                                                                                                                                                                                                                                                                                                                                                                                                                                                                                                                                                                                                                                                                                                                                                                                                                                                                                                                                                                                                                                                                                                                  | 0.000000 |          |          |          |   |   |     |          |  |  |  |  |     |          |          |  |  |  |     |          |          |          |  |  |     |          |          |          |          |  |     |          |          |          |          |          |      |          |          |          |          |          |      |          |          |          |          |          |      |          |          |          |          |          |     |          |          |          |          |          |       |          |          |          |          |          |       |          |          |          |          |          |  |   |   |   |   |    |      |          |  |  |  |  |      |          |          |  |  |  |      |          |          |          |  |  |     |          |          |          |          |  |       |          |          |          |          |          |       |          |          |          |          |          |
| 3 B                                                                                                                                | 1.782476                                                                                                                                                                                                                                                                                                                                                                                                                                                                                                                                                                                                                                                                                                                                                                                                                                                                                                                                                                                                                                                                                                                                                                                                                                                                                                                                                                                                                                                                                                                                                                                                                                                                                                                                                                                                                                                                                                                                                  | 1.814011 | 0.000000 |          |          |   |   |     |          |  |  |  |  |     |          |          |  |  |  |     |          |          |          |  |  |     |          |          |          |          |  |     |          |          |          |          |          |      |          |          |          |          |          |      |          |          |          |          |          |      |          |          |          |          |          |     |          |          |          |          |          |       |          |          |          |          |          |       |          |          |          |          |          |  |   |   |   |   |    |      |          |  |  |  |  |      |          |          |  |  |  |      |          |          |          |  |  |     |          |          |          |          |  |       |          |          |          |          |          |       |          |          |          |          |          |
| 4 B                                                                                                                                | 3.432285                                                                                                                                                                                                                                                                                                                                                                                                                                                                                                                                                                                                                                                                                                                                                                                                                                                                                                                                                                                                                                                                                                                                                                                                                                                                                                                                                                                                                                                                                                                                                                                                                                                                                                                                                                                                                                                                                                                                                  | 1.807185 | 3.052580 | 0.000000 |          |   |   |     |          |  |  |  |  |     |          |          |  |  |  |     |          |          |          |  |  |     |          |          |          |          |  |     |          |          |          |          |          |      |          |          |          |          |          |      |          |          |          |          |          |      |          |          |          |          |          |     |          |          |          |          |          |       |          |          |          |          |          |       |          |          |          |          |          |  |   |   |   |   |    |      |          |  |  |  |  |      |          |          |  |  |  |      |          |          |          |  |  |     |          |          |          |          |  |       |          |          |          |          |          |       |          |          |          |          |          |
| 5 B                                                                                                                                | 3.591521                                                                                                                                                                                                                                                                                                                                                                                                                                                                                                                                                                                                                                                                                                                                                                                                                                                                                                                                                                                                                                                                                                                                                                                                                                                                                                                                                                                                                                                                                                                                                                                                                                                                                                                                                                                                                                                                                                                                                  | 3.426340 | 2.961000 | 3.024180 | 0.000000 |   |   |     |          |  |  |  |  |     |          |          |  |  |  |     |          |          |          |  |  |     |          |          |          |          |  |     |          |          |          |          |          |      |          |          |          |          |          |      |          |          |          |          |          |      |          |          |          |          |          |     |          |          |          |          |          |       |          |          |          |          |          |       |          |          |          |          |          |  |   |   |   |   |    |      |          |  |  |  |  |      |          |          |  |  |  |      |          |          |          |  |  |     |          |          |          |          |  |       |          |          |          |          |          |       |          |          |          |          |          |
| 6 B                                                                                                                                | 1.789427                                                                                                                                                                                                                                                                                                                                                                                                                                                                                                                                                                                                                                                                                                                                                                                                                                                                                                                                                                                                                                                                                                                                                                                                                                                                                                                                                                                                                                                                                                                                                                                                                                                                                                                                                                                                                                                                                                                                                  | 3.438711 | 3.008732 | 3.106204 | 3.197421 |   |   |     |          |  |  |  |  |     |          |          |  |  |  |     |          |          |          |  |  |     |          |          |          |          |  |     |          |          |          |          |          |      |          |          |          |          |          |      |          |          |          |          |          |      |          |          |          |          |          |     |          |          |          |          |          |       |          |          |          |          |          |       |          |          |          |          |          |  |   |   |   |   |    |      |          |  |  |  |  |      |          |          |  |  |  |      |          |          |          |  |  |     |          |          |          |          |  |       |          |          |          |          |          |       |          |          |          |          |          |
| 7 B                                                                                                                                | 1.735130                                                                                                                                                                                                                                                                                                                                                                                                                                                                                                                                                                                                                                                                                                                                                                                                                                                                                                                                                                                                                                                                                                                                                                                                                                                                                                                                                                                                                                                                                                                                                                                                                                                                                                                                                                                                                                                                                                                                                  | 1.738236 | 1.714646 | 3.066348 | 4.263594 |   |   |     |          |  |  |  |  |     |          |          |  |  |  |     |          |          |          |  |  |     |          |          |          |          |  |     |          |          |          |          |          |      |          |          |          |          |          |      |          |          |          |          |          |      |          |          |          |          |          |     |          |          |          |          |          |       |          |          |          |          |          |       |          |          |          |          |          |  |   |   |   |   |    |      |          |  |  |  |  |      |          |          |  |  |  |      |          |          |          |  |  |     |          |          |          |          |  |       |          |          |          |          |          |       |          |          |          |          |          |
| 8 Os                                                                                                                               | 3.326730                                                                                                                                                                                                                                                                                                                                                                                                                                                                                                                                                                                                                                                                                                                                                                                                                                                                                                                                                                                                                                                                                                                                                                                                                                                                                                                                                                                                                                                                                                                                                                                                                                                                                                                                                                                                                                                                                                                                                  | 3.339583 | 3.499461 | 2.141026 | 2.048721 |   |   |     |          |  |  |  |  |     |          |          |  |  |  |     |          |          |          |  |  |     |          |          |          |          |  |     |          |          |          |          |          |      |          |          |          |          |          |      |          |          |          |          |          |      |          |          |          |          |          |     |          |          |          |          |          |       |          |          |          |          |          |       |          |          |          |          |          |  |   |   |   |   |    |      |          |  |  |  |  |      |          |          |  |  |  |      |          |          |          |  |  |     |          |          |          |          |  |       |          |          |          |          |          |       |          |          |          |          |          |
| 9 B                                                                                                                                | 1.789696                                                                                                                                                                                                                                                                                                                                                                                                                                                                                                                                                                                                                                                                                                                                                                                                                                                                                                                                                                                                                                                                                                                                                                                                                                                                                                                                                                                                                                                                                                                                                                                                                                                                                                                                                                                                                                                                                                                                                  | 2.923392 | 1.845956 | 3.091802 | 1.897302 |   |   |     |          |  |  |  |  |     |          |          |  |  |  |     |          |          |          |  |  |     |          |          |          |          |  |     |          |          |          |          |          |      |          |          |          |          |          |      |          |          |          |          |          |      |          |          |          |          |          |     |          |          |          |          |          |       |          |          |          |          |          |       |          |          |          |          |          |  |   |   |   |   |    |      |          |  |  |  |  |      |          |          |  |  |  |      |          |          |          |  |  |     |          |          |          |          |  |       |          |          |          |          |          |       |          |          |          |          |          |
| 10 Os                                                                                                                              | 2.340759                                                                                                                                                                                                                                                                                                                                                                                                                                                                                                                                                                                                                                                                                                                                                                                                                                                                                                                                                                                                                                                                                                                                                                                                                                                                                                                                                                                                                                                                                                                                                                                                                                                                                                                                                                                                                                                                                                                                                  | 2.351233 | 3.042324 | 2.150402 | 4.140612 |   |   |     |          |  |  |  |  |     |          |          |  |  |  |     |          |          |          |  |  |     |          |          |          |          |  |     |          |          |          |          |          |      |          |          |          |          |          |      |          |          |          |          |          |      |          |          |          |          |          |     |          |          |          |          |          |       |          |          |          |          |          |       |          |          |          |          |          |  |   |   |   |   |    |      |          |  |  |  |  |      |          |          |  |  |  |      |          |          |          |  |  |     |          |          |          |          |  |       |          |          |          |          |          |       |          |          |          |          |          |
| 11 B                                                                                                                               | 2.814920                                                                                                                                                                                                                                                                                                                                                                                                                                                                                                                                                                                                                                                                                                                                                                                                                                                                                                                                                                                                                                                                                                                                                                                                                                                                                                                                                                                                                                                                                                                                                                                                                                                                                                                                                                                                                                                                                                                                                  | 1.741408 | 1.814597 | 1.835256 | 1.692844 |   |   |     |          |  |  |  |  |     |          |          |  |  |  |     |          |          |          |  |  |     |          |          |          |          |  |     |          |          |          |          |          |      |          |          |          |          |          |      |          |          |          |          |          |      |          |          |          |          |          |     |          |          |          |          |          |       |          |          |          |          |          |       |          |          |          |          |          |  |   |   |   |   |    |      |          |  |  |  |  |      |          |          |  |  |  |      |          |          |          |  |  |     |          |          |          |          |  |       |          |          |          |          |          |       |          |          |          |          |          |
|                                                                                                                                    | 6                                                                                                                                                                                                                                                                                                                                                                                                                                                                                                                                                                                                                                                                                                                                                                                                                                                                                                                                                                                                                                                                                                                                                                                                                                                                                                                                                                                                                                                                                                                                                                                                                                                                                                                                                                                                                                                                                                                                                         | 7        | 8        | 9        | 10       |   |   |     |          |  |  |  |  |     |          |          |  |  |  |     |          |          |          |  |  |     |          |          |          |          |  |     |          |          |          |          |          |      |          |          |          |          |          |      |          |          |          |          |          |      |          |          |          |          |          |     |          |          |          |          |          |       |          |          |          |          |          |       |          |          |          |          |          |  |   |   |   |   |    |      |          |  |  |  |  |      |          |          |  |  |  |      |          |          |          |  |  |     |          |          |          |          |  |       |          |          |          |          |          |       |          |          |          |          |          |
| 6 B                                                                                                                                | 0.000000                                                                                                                                                                                                                                                                                                                                                                                                                                                                                                                                                                                                                                                                                                                                                                                                                                                                                                                                                                                                                                                                                                                                                                                                                                                                                                                                                                                                                                                                                                                                                                                                                                                                                                                                                                                                                                                                                                                                                  |          |          |          |          |   |   |     |          |  |  |  |  |     |          |          |  |  |  |     |          |          |          |  |  |     |          |          |          |          |  |     |          |          |          |          |          |      |          |          |          |          |          |      |          |          |          |          |          |      |          |          |          |          |          |     |          |          |          |          |          |       |          |          |          |          |          |       |          |          |          |          |          |  |   |   |   |   |    |      |          |  |  |  |  |      |          |          |  |  |  |      |          |          |          |  |  |     |          |          |          |          |  |       |          |          |          |          |          |       |          |          |          |          |          |
| 7 B                                                                                                                                | 3.070835                                                                                                                                                                                                                                                                                                                                                                                                                                                                                                                                                                                                                                                                                                                                                                                                                                                                                                                                                                                                                                                                                                                                                                                                                                                                                                                                                                                                                                                                                                                                                                                                                                                                                                                                                                                                                                                                                                                                                  | 0.000000 |          |          |          |   |   |     |          |  |  |  |  |     |          |          |  |  |  |     |          |          |          |  |  |     |          |          |          |          |  |     |          |          |          |          |          |      |          |          |          |          |          |      |          |          |          |          |          |      |          |          |          |          |          |     |          |          |          |          |          |       |          |          |          |          |          |       |          |          |          |          |          |  |   |   |   |   |    |      |          |  |  |  |  |      |          |          |  |  |  |      |          |          |          |  |  |     |          |          |          |          |  |       |          |          |          |          |          |       |          |          |          |          |          |
| 8 Os                                                                                                                               | 2.118272                                                                                                                                                                                                                                                                                                                                                                                                                                                                                                                                                                                                                                                                                                                                                                                                                                                                                                                                                                                                                                                                                                                                                                                                                                                                                                                                                                                                                                                                                                                                                                                                                                                                                                                                                                                                                                                                                                                                                  | 4.009880 | 0.000000 |          |          |   |   |     |          |  |  |  |  |     |          |          |  |  |  |     |          |          |          |  |  |     |          |          |          |          |  |     |          |          |          |          |          |      |          |          |          |          |          |      |          |          |          |          |          |      |          |          |          |          |          |     |          |          |          |          |          |       |          |          |          |          |          |       |          |          |          |          |          |  |   |   |   |   |    |      |          |  |  |  |  |      |          |          |  |  |  |      |          |          |          |  |  |     |          |          |          |          |  |       |          |          |          |          |          |       |          |          |          |          |          |
| 9 B                                                                                                                                | 1.845836                                                                                                                                                                                                                                                                                                                                                                                                                                                                                                                                                                                                                                                                                                                                                                                                                                                                                                                                                                                                                                                                                                                                                                                                                                                                                                                                                                                                                                                                                                                                                                                                                                                                                                                                                                                                                                                                                                                                                  | 2.935699 | 2.290707 | 0.000000 |          |   |   |     |          |  |  |  |  |     |          |          |  |  |  |     |          |          |          |  |  |     |          |          |          |          |  |     |          |          |          |          |          |      |          |          |          |          |          |      |          |          |          |          |          |      |          |          |          |          |          |     |          |          |          |          |          |       |          |          |          |          |          |       |          |          |          |          |          |  |   |   |   |   |    |      |          |  |  |  |  |      |          |          |  |  |  |      |          |          |          |  |  |     |          |          |          |          |  |       |          |          |          |          |          |       |          |          |          |          |          |
| 10 Os                                                                                                                              | 2.181789                                                                                                                                                                                                                                                                                                                                                                                                                                                                                                                                                                                                                                                                                                                                                                                                                                                                                                                                                                                                                                                                                                                                                                                                                                                                                                                                                                                                                                                                                                                                                                                                                                                                                                                                                                                                                                                                                                                                                  | 2.124648 | 2.881041 | 3.108353 | 0.000000 |   |   |     |          |  |  |  |  |     |          |          |  |  |  |     |          |          |          |  |  |     |          |          |          |          |  |     |          |          |          |          |          |      |          |          |          |          |          |      |          |          |          |          |          |      |          |          |          |          |          |     |          |          |          |          |          |       |          |          |          |          |          |       |          |          |          |          |          |  |   |   |   |   |    |      |          |  |  |  |  |      |          |          |  |  |  |      |          |          |          |  |  |     |          |          |          |          |  |       |          |          |          |          |          |       |          |          |          |          |          |
| 11 B                                                                                                                               | 2.957564                                                                                                                                                                                                                                                                                                                                                                                                                                                                                                                                                                                                                                                                                                                                                                                                                                                                                                                                                                                                                                                                                                                                                                                                                                                                                                                                                                                                                                                                                                                                                                                                                                                                                                                                                                                                                                                                                                                                                  | 2.849015 | 2.233171 | 1.857204 | 2.997591 |   |   |     |          |  |  |  |  |     |          |          |  |  |  |     |          |          |          |  |  |     |          |          |          |          |  |     |          |          |          |          |          |      |          |          |          |          |          |      |          |          |          |          |          |      |          |          |          |          |          |     |          |          |          |          |          |       |          |          |          |          |          |       |          |          |          |          |          |  |   |   |   |   |    |      |          |  |  |  |  |      |          |          |  |  |  |      |          |          |          |  |  |     |          |          |          |          |  |       |          |          |          |          |          |       |          |          |          |          |          |
|  <p>3. -797.76702255 +15.8 <math>C_2</math></p> | <table border="1"> <thead> <tr> <th></th> <th>1</th> <th>2</th> <th>3</th> <th>4</th> <th>5</th> </tr> </thead> <tbody> <tr><td>1 B</td><td>0.000000</td><td></td><td></td><td></td><td></td></tr> <tr><td>2 B</td><td>3.017499</td><td>0.000000</td><td></td><td></td><td></td></tr> <tr><td>3 B</td><td>3.532041</td><td>1.756618</td><td>0.000000</td><td></td><td></td></tr> <tr><td>4 B</td><td>1.804436</td><td>3.426093</td><td>2.988134</td><td>0.000000</td><td></td></tr> <tr><td>5 B</td><td>1.841703</td><td>3.066947</td><td>3.352285</td><td>1.918383</td><td>0.000000</td></tr> <tr><td>6 Os</td><td>3.481704</td><td>2.166075</td><td>2.370522</td><td>3.314434</td><td>2.262053</td></tr> <tr><td>7 B</td><td>4.053560</td><td>3.017499</td><td>1.752714</td><td>2.963267</td><td>3.112692</td></tr> <tr><td>8 B</td><td>2.963267</td><td>3.426093</td><td>2.759467</td><td>1.724626</td><td>1.759586</td></tr> <tr><td>9 B</td><td>3.112677</td><td>3.066860</td><td>1.778796</td><td>1.759622</td><td>2.991426</td></tr> <tr><td>10 Os</td><td>2.060441</td><td>2.166075</td><td>2.230262</td><td>2.285294</td><td>3.103676</td></tr> <tr><td>11 B</td><td>1.752643</td><td>1.756675</td><td>2.904868</td><td>2.759383</td><td>1.778796</td></tr> <tr> <td></td> <td>6</td> <td>7</td> <td>8</td> <td>9</td> <td>10</td> </tr> <tr><td>6 Os</td><td>0.000000</td><td></td><td></td><td></td><td></td></tr> <tr><td>7 B</td><td>2.060441</td><td>0.000000</td><td></td><td></td><td></td></tr> <tr><td>8 B</td><td>2.285294</td><td>1.804436</td><td>0.000000</td><td></td><td></td></tr> <tr><td>9 B</td><td>3.103630</td><td>1.841679</td><td>1.918416</td><td>0.000000</td><td></td></tr> <tr><td>10 Os</td><td>3.530213</td><td>3.481704</td><td>3.314434</td><td>2.261990</td><td>0.000000</td></tr> <tr><td>11 B</td><td>2.230250</td><td>3.532005</td><td>2.988056</td><td>3.352184</td><td>2.370511</td></tr> </tbody> </table> |          | 1        | 2        | 3        | 4 | 5 | 1 B | 0.000000 |  |  |  |  | 2 B | 3.017499 | 0.000000 |  |  |  | 3 B | 3.532041 | 1.756618 | 0.000000 |  |  | 4 B | 1.804436 | 3.426093 | 2.988134 | 0.000000 |  | 5 B | 1.841703 | 3.066947 | 3.352285 | 1.918383 | 0.000000 | 6 Os | 3.481704 | 2.166075 | 2.370522 | 3.314434 | 2.262053 | 7 B  | 4.053560 | 3.017499 | 1.752714 | 2.963267 | 3.112692 | 8 B  | 2.963267 | 3.426093 | 2.759467 | 1.724626 | 1.759586 | 9 B | 3.112677 | 3.066860 | 1.778796 | 1.759622 | 2.991426 | 10 Os | 2.060441 | 2.166075 | 2.230262 | 2.285294 | 3.103676 | 11 B  | 1.752643 | 1.756675 | 2.904868 | 2.759383 | 1.778796 |  | 6 | 7 | 8 | 9 | 10 | 6 Os | 0.000000 |  |  |  |  | 7 B  | 2.060441 | 0.000000 |  |  |  | 8 B  | 2.285294 | 1.804436 | 0.000000 |  |  | 9 B | 3.103630 | 1.841679 | 1.918416 | 0.000000 |  | 10 Os | 3.530213 | 3.481704 | 3.314434 | 2.261990 | 0.000000 | 11 B  | 2.230250 | 3.532005 | 2.988056 | 3.352184 | 2.370511 |
|                                                                                                                                    | 1                                                                                                                                                                                                                                                                                                                                                                                                                                                                                                                                                                                                                                                                                                                                                                                                                                                                                                                                                                                                                                                                                                                                                                                                                                                                                                                                                                                                                                                                                                                                                                                                                                                                                                                                                                                                                                                                                                                                                         | 2        | 3        | 4        | 5        |   |   |     |          |  |  |  |  |     |          |          |  |  |  |     |          |          |          |  |  |     |          |          |          |          |  |     |          |          |          |          |          |      |          |          |          |          |          |      |          |          |          |          |          |      |          |          |          |          |          |     |          |          |          |          |          |       |          |          |          |          |          |       |          |          |          |          |          |  |   |   |   |   |    |      |          |  |  |  |  |      |          |          |  |  |  |      |          |          |          |  |  |     |          |          |          |          |  |       |          |          |          |          |          |       |          |          |          |          |          |
| 1 B                                                                                                                                | 0.000000                                                                                                                                                                                                                                                                                                                                                                                                                                                                                                                                                                                                                                                                                                                                                                                                                                                                                                                                                                                                                                                                                                                                                                                                                                                                                                                                                                                                                                                                                                                                                                                                                                                                                                                                                                                                                                                                                                                                                  |          |          |          |          |   |   |     |          |  |  |  |  |     |          |          |  |  |  |     |          |          |          |  |  |     |          |          |          |          |  |     |          |          |          |          |          |      |          |          |          |          |          |      |          |          |          |          |          |      |          |          |          |          |          |     |          |          |          |          |          |       |          |          |          |          |          |       |          |          |          |          |          |  |   |   |   |   |    |      |          |  |  |  |  |      |          |          |  |  |  |      |          |          |          |  |  |     |          |          |          |          |  |       |          |          |          |          |          |       |          |          |          |          |          |
| 2 B                                                                                                                                | 3.017499                                                                                                                                                                                                                                                                                                                                                                                                                                                                                                                                                                                                                                                                                                                                                                                                                                                                                                                                                                                                                                                                                                                                                                                                                                                                                                                                                                                                                                                                                                                                                                                                                                                                                                                                                                                                                                                                                                                                                  | 0.000000 |          |          |          |   |   |     |          |  |  |  |  |     |          |          |  |  |  |     |          |          |          |  |  |     |          |          |          |          |  |     |          |          |          |          |          |      |          |          |          |          |          |      |          |          |          |          |          |      |          |          |          |          |          |     |          |          |          |          |          |       |          |          |          |          |          |       |          |          |          |          |          |  |   |   |   |   |    |      |          |  |  |  |  |      |          |          |  |  |  |      |          |          |          |  |  |     |          |          |          |          |  |       |          |          |          |          |          |       |          |          |          |          |          |
| 3 B                                                                                                                                | 3.532041                                                                                                                                                                                                                                                                                                                                                                                                                                                                                                                                                                                                                                                                                                                                                                                                                                                                                                                                                                                                                                                                                                                                                                                                                                                                                                                                                                                                                                                                                                                                                                                                                                                                                                                                                                                                                                                                                                                                                  | 1.756618 | 0.000000 |          |          |   |   |     |          |  |  |  |  |     |          |          |  |  |  |     |          |          |          |  |  |     |          |          |          |          |  |     |          |          |          |          |          |      |          |          |          |          |          |      |          |          |          |          |          |      |          |          |          |          |          |     |          |          |          |          |          |       |          |          |          |          |          |       |          |          |          |          |          |  |   |   |   |   |    |      |          |  |  |  |  |      |          |          |  |  |  |      |          |          |          |  |  |     |          |          |          |          |  |       |          |          |          |          |          |       |          |          |          |          |          |
| 4 B                                                                                                                                | 1.804436                                                                                                                                                                                                                                                                                                                                                                                                                                                                                                                                                                                                                                                                                                                                                                                                                                                                                                                                                                                                                                                                                                                                                                                                                                                                                                                                                                                                                                                                                                                                                                                                                                                                                                                                                                                                                                                                                                                                                  | 3.426093 | 2.988134 | 0.000000 |          |   |   |     |          |  |  |  |  |     |          |          |  |  |  |     |          |          |          |  |  |     |          |          |          |          |  |     |          |          |          |          |          |      |          |          |          |          |          |      |          |          |          |          |          |      |          |          |          |          |          |     |          |          |          |          |          |       |          |          |          |          |          |       |          |          |          |          |          |  |   |   |   |   |    |      |          |  |  |  |  |      |          |          |  |  |  |      |          |          |          |  |  |     |          |          |          |          |  |       |          |          |          |          |          |       |          |          |          |          |          |
| 5 B                                                                                                                                | 1.841703                                                                                                                                                                                                                                                                                                                                                                                                                                                                                                                                                                                                                                                                                                                                                                                                                                                                                                                                                                                                                                                                                                                                                                                                                                                                                                                                                                                                                                                                                                                                                                                                                                                                                                                                                                                                                                                                                                                                                  | 3.066947 | 3.352285 | 1.918383 | 0.000000 |   |   |     |          |  |  |  |  |     |          |          |  |  |  |     |          |          |          |  |  |     |          |          |          |          |  |     |          |          |          |          |          |      |          |          |          |          |          |      |          |          |          |          |          |      |          |          |          |          |          |     |          |          |          |          |          |       |          |          |          |          |          |       |          |          |          |          |          |  |   |   |   |   |    |      |          |  |  |  |  |      |          |          |  |  |  |      |          |          |          |  |  |     |          |          |          |          |  |       |          |          |          |          |          |       |          |          |          |          |          |
| 6 Os                                                                                                                               | 3.481704                                                                                                                                                                                                                                                                                                                                                                                                                                                                                                                                                                                                                                                                                                                                                                                                                                                                                                                                                                                                                                                                                                                                                                                                                                                                                                                                                                                                                                                                                                                                                                                                                                                                                                                                                                                                                                                                                                                                                  | 2.166075 | 2.370522 | 3.314434 | 2.262053 |   |   |     |          |  |  |  |  |     |          |          |  |  |  |     |          |          |          |  |  |     |          |          |          |          |  |     |          |          |          |          |          |      |          |          |          |          |          |      |          |          |          |          |          |      |          |          |          |          |          |     |          |          |          |          |          |       |          |          |          |          |          |       |          |          |          |          |          |  |   |   |   |   |    |      |          |  |  |  |  |      |          |          |  |  |  |      |          |          |          |  |  |     |          |          |          |          |  |       |          |          |          |          |          |       |          |          |          |          |          |
| 7 B                                                                                                                                | 4.053560                                                                                                                                                                                                                                                                                                                                                                                                                                                                                                                                                                                                                                                                                                                                                                                                                                                                                                                                                                                                                                                                                                                                                                                                                                                                                                                                                                                                                                                                                                                                                                                                                                                                                                                                                                                                                                                                                                                                                  | 3.017499 | 1.752714 | 2.963267 | 3.112692 |   |   |     |          |  |  |  |  |     |          |          |  |  |  |     |          |          |          |  |  |     |          |          |          |          |  |     |          |          |          |          |          |      |          |          |          |          |          |      |          |          |          |          |          |      |          |          |          |          |          |     |          |          |          |          |          |       |          |          |          |          |          |       |          |          |          |          |          |  |   |   |   |   |    |      |          |  |  |  |  |      |          |          |  |  |  |      |          |          |          |  |  |     |          |          |          |          |  |       |          |          |          |          |          |       |          |          |          |          |          |
| 8 B                                                                                                                                | 2.963267                                                                                                                                                                                                                                                                                                                                                                                                                                                                                                                                                                                                                                                                                                                                                                                                                                                                                                                                                                                                                                                                                                                                                                                                                                                                                                                                                                                                                                                                                                                                                                                                                                                                                                                                                                                                                                                                                                                                                  | 3.426093 | 2.759467 | 1.724626 | 1.759586 |   |   |     |          |  |  |  |  |     |          |          |  |  |  |     |          |          |          |  |  |     |          |          |          |          |  |     |          |          |          |          |          |      |          |          |          |          |          |      |          |          |          |          |          |      |          |          |          |          |          |     |          |          |          |          |          |       |          |          |          |          |          |       |          |          |          |          |          |  |   |   |   |   |    |      |          |  |  |  |  |      |          |          |  |  |  |      |          |          |          |  |  |     |          |          |          |          |  |       |          |          |          |          |          |       |          |          |          |          |          |
| 9 B                                                                                                                                | 3.112677                                                                                                                                                                                                                                                                                                                                                                                                                                                                                                                                                                                                                                                                                                                                                                                                                                                                                                                                                                                                                                                                                                                                                                                                                                                                                                                                                                                                                                                                                                                                                                                                                                                                                                                                                                                                                                                                                                                                                  | 3.066860 | 1.778796 | 1.759622 | 2.991426 |   |   |     |          |  |  |  |  |     |          |          |  |  |  |     |          |          |          |  |  |     |          |          |          |          |  |     |          |          |          |          |          |      |          |          |          |          |          |      |          |          |          |          |          |      |          |          |          |          |          |     |          |          |          |          |          |       |          |          |          |          |          |       |          |          |          |          |          |  |   |   |   |   |    |      |          |  |  |  |  |      |          |          |  |  |  |      |          |          |          |  |  |     |          |          |          |          |  |       |          |          |          |          |          |       |          |          |          |          |          |
| 10 Os                                                                                                                              | 2.060441                                                                                                                                                                                                                                                                                                                                                                                                                                                                                                                                                                                                                                                                                                                                                                                                                                                                                                                                                                                                                                                                                                                                                                                                                                                                                                                                                                                                                                                                                                                                                                                                                                                                                                                                                                                                                                                                                                                                                  | 2.166075 | 2.230262 | 2.285294 | 3.103676 |   |   |     |          |  |  |  |  |     |          |          |  |  |  |     |          |          |          |  |  |     |          |          |          |          |  |     |          |          |          |          |          |      |          |          |          |          |          |      |          |          |          |          |          |      |          |          |          |          |          |     |          |          |          |          |          |       |          |          |          |          |          |       |          |          |          |          |          |  |   |   |   |   |    |      |          |  |  |  |  |      |          |          |  |  |  |      |          |          |          |  |  |     |          |          |          |          |  |       |          |          |          |          |          |       |          |          |          |          |          |
| 11 B                                                                                                                               | 1.752643                                                                                                                                                                                                                                                                                                                                                                                                                                                                                                                                                                                                                                                                                                                                                                                                                                                                                                                                                                                                                                                                                                                                                                                                                                                                                                                                                                                                                                                                                                                                                                                                                                                                                                                                                                                                                                                                                                                                                  | 1.756675 | 2.904868 | 2.759383 | 1.778796 |   |   |     |          |  |  |  |  |     |          |          |  |  |  |     |          |          |          |  |  |     |          |          |          |          |  |     |          |          |          |          |          |      |          |          |          |          |          |      |          |          |          |          |          |      |          |          |          |          |          |     |          |          |          |          |          |       |          |          |          |          |          |       |          |          |          |          |          |  |   |   |   |   |    |      |          |  |  |  |  |      |          |          |  |  |  |      |          |          |          |  |  |     |          |          |          |          |  |       |          |          |          |          |          |       |          |          |          |          |          |
|                                                                                                                                    | 6                                                                                                                                                                                                                                                                                                                                                                                                                                                                                                                                                                                                                                                                                                                                                                                                                                                                                                                                                                                                                                                                                                                                                                                                                                                                                                                                                                                                                                                                                                                                                                                                                                                                                                                                                                                                                                                                                                                                                         | 7        | 8        | 9        | 10       |   |   |     |          |  |  |  |  |     |          |          |  |  |  |     |          |          |          |  |  |     |          |          |          |          |  |     |          |          |          |          |          |      |          |          |          |          |          |      |          |          |          |          |          |      |          |          |          |          |          |     |          |          |          |          |          |       |          |          |          |          |          |       |          |          |          |          |          |  |   |   |   |   |    |      |          |  |  |  |  |      |          |          |  |  |  |      |          |          |          |  |  |     |          |          |          |          |  |       |          |          |          |          |          |       |          |          |          |          |          |
| 6 Os                                                                                                                               | 0.000000                                                                                                                                                                                                                                                                                                                                                                                                                                                                                                                                                                                                                                                                                                                                                                                                                                                                                                                                                                                                                                                                                                                                                                                                                                                                                                                                                                                                                                                                                                                                                                                                                                                                                                                                                                                                                                                                                                                                                  |          |          |          |          |   |   |     |          |  |  |  |  |     |          |          |  |  |  |     |          |          |          |  |  |     |          |          |          |          |  |     |          |          |          |          |          |      |          |          |          |          |          |      |          |          |          |          |          |      |          |          |          |          |          |     |          |          |          |          |          |       |          |          |          |          |          |       |          |          |          |          |          |  |   |   |   |   |    |      |          |  |  |  |  |      |          |          |  |  |  |      |          |          |          |  |  |     |          |          |          |          |  |       |          |          |          |          |          |       |          |          |          |          |          |
| 7 B                                                                                                                                | 2.060441                                                                                                                                                                                                                                                                                                                                                                                                                                                                                                                                                                                                                                                                                                                                                                                                                                                                                                                                                                                                                                                                                                                                                                                                                                                                                                                                                                                                                                                                                                                                                                                                                                                                                                                                                                                                                                                                                                                                                  | 0.000000 |          |          |          |   |   |     |          |  |  |  |  |     |          |          |  |  |  |     |          |          |          |  |  |     |          |          |          |          |  |     |          |          |          |          |          |      |          |          |          |          |          |      |          |          |          |          |          |      |          |          |          |          |          |     |          |          |          |          |          |       |          |          |          |          |          |       |          |          |          |          |          |  |   |   |   |   |    |      |          |  |  |  |  |      |          |          |  |  |  |      |          |          |          |  |  |     |          |          |          |          |  |       |          |          |          |          |          |       |          |          |          |          |          |
| 8 B                                                                                                                                | 2.285294                                                                                                                                                                                                                                                                                                                                                                                                                                                                                                                                                                                                                                                                                                                                                                                                                                                                                                                                                                                                                                                                                                                                                                                                                                                                                                                                                                                                                                                                                                                                                                                                                                                                                                                                                                                                                                                                                                                                                  | 1.804436 | 0.000000 |          |          |   |   |     |          |  |  |  |  |     |          |          |  |  |  |     |          |          |          |  |  |     |          |          |          |          |  |     |          |          |          |          |          |      |          |          |          |          |          |      |          |          |          |          |          |      |          |          |          |          |          |     |          |          |          |          |          |       |          |          |          |          |          |       |          |          |          |          |          |  |   |   |   |   |    |      |          |  |  |  |  |      |          |          |  |  |  |      |          |          |          |  |  |     |          |          |          |          |  |       |          |          |          |          |          |       |          |          |          |          |          |
| 9 B                                                                                                                                | 3.103630                                                                                                                                                                                                                                                                                                                                                                                                                                                                                                                                                                                                                                                                                                                                                                                                                                                                                                                                                                                                                                                                                                                                                                                                                                                                                                                                                                                                                                                                                                                                                                                                                                                                                                                                                                                                                                                                                                                                                  | 1.841679 | 1.918416 | 0.000000 |          |   |   |     |          |  |  |  |  |     |          |          |  |  |  |     |          |          |          |  |  |     |          |          |          |          |  |     |          |          |          |          |          |      |          |          |          |          |          |      |          |          |          |          |          |      |          |          |          |          |          |     |          |          |          |          |          |       |          |          |          |          |          |       |          |          |          |          |          |  |   |   |   |   |    |      |          |  |  |  |  |      |          |          |  |  |  |      |          |          |          |  |  |     |          |          |          |          |  |       |          |          |          |          |          |       |          |          |          |          |          |
| 10 Os                                                                                                                              | 3.530213                                                                                                                                                                                                                                                                                                                                                                                                                                                                                                                                                                                                                                                                                                                                                                                                                                                                                                                                                                                                                                                                                                                                                                                                                                                                                                                                                                                                                                                                                                                                                                                                                                                                                                                                                                                                                                                                                                                                                  | 3.481704 | 3.314434 | 2.261990 | 0.000000 |   |   |     |          |  |  |  |  |     |          |          |  |  |  |     |          |          |          |  |  |     |          |          |          |          |  |     |          |          |          |          |          |      |          |          |          |          |          |      |          |          |          |          |          |      |          |          |          |          |          |     |          |          |          |          |          |       |          |          |          |          |          |       |          |          |          |          |          |  |   |   |   |   |    |      |          |  |  |  |  |      |          |          |  |  |  |      |          |          |          |  |  |     |          |          |          |          |  |       |          |          |          |          |          |       |          |          |          |          |          |
| 11 B                                                                                                                               | 2.230250                                                                                                                                                                                                                                                                                                                                                                                                                                                                                                                                                                                                                                                                                                                                                                                                                                                                                                                                                                                                                                                                                                                                                                                                                                                                                                                                                                                                                                                                                                                                                                                                                                                                                                                                                                                                                                                                                                                                                  | 3.532005 | 2.988056 | 3.352184 | 2.370511 |   |   |     |          |  |  |  |  |     |          |          |  |  |  |     |          |          |          |  |  |     |          |          |          |          |  |     |          |          |          |          |          |      |          |          |          |          |          |      |          |          |          |          |          |      |          |          |          |          |          |     |          |          |          |          |          |       |          |          |          |          |          |       |          |          |          |          |          |  |   |   |   |   |    |      |          |  |  |  |  |      |          |          |  |  |  |      |          |          |          |  |  |     |          |          |          |          |  |       |          |          |          |          |          |       |          |          |          |          |          |

| 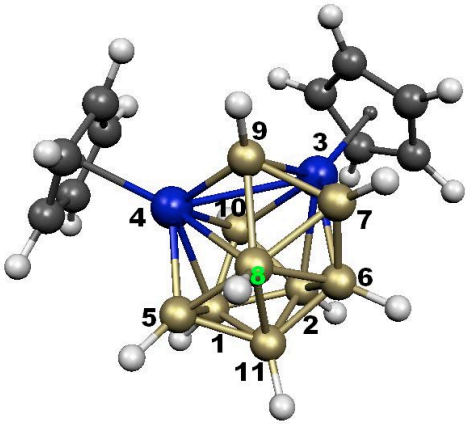 <p>4. -797.76649440 +16.2</p>                  | <table border="1"> <thead> <tr> <th></th> <th>1</th> <th>2</th> <th>3</th> <th>4</th> <th>5</th> </tr> </thead> <tbody> <tr><td>1 B</td><td>0.000000</td><td></td><td></td><td></td><td></td></tr> <tr><td>2 B</td><td>1.804301</td><td>0.000000</td><td></td><td></td><td></td></tr> <tr><td>3 Os</td><td>3.309142</td><td>2.271794</td><td>0.000000</td><td></td><td></td></tr> <tr><td>4 Os</td><td>2.325407</td><td>3.152796</td><td>2.889194</td><td>0.000000</td><td></td></tr> <tr><td>5 B</td><td>1.762317</td><td>2.953632</td><td>3.854131</td><td>2.059303</td><td>0.000000</td></tr> <tr><td>6 B</td><td>2.858265</td><td>1.747829</td><td>2.273431</td><td>3.396886</td><td>2.974909</td></tr> <tr><td>7 B</td><td>3.895606</td><td>3.086792</td><td>2.105032</td><td>3.301128</td><td>3.547157</td></tr> <tr><td>8 B</td><td>2.865339</td><td>2.921071</td><td>2.991283</td><td>2.430728</td><td>1.881840</td></tr> <tr><td>9 B</td><td>3.644439</td><td>3.540302</td><td>2.266662</td><td>2.028030</td><td>3.106695</td></tr> <tr><td>10 B</td><td>1.781680</td><td>1.810455</td><td>2.142933</td><td>2.140428</td><td>3.016504</td></tr> <tr><td>11 B</td><td>1.761631</td><td>1.820183</td><td>3.369118</td><td>3.086290</td><td>1.763290</td></tr> <tr> <td></td> <td>6</td> <td>7</td> <td>8</td> <td>9</td> <td>10</td> </tr> <tr><td>6 B</td><td>0.000000</td><td></td><td></td><td></td><td></td></tr> <tr><td>7 B</td><td>1.709562</td><td>0.000000</td><td></td><td></td><td></td></tr> <tr><td>8 B</td><td>1.908811</td><td>1.828303</td><td>0.000000</td><td></td><td></td></tr> <tr><td>9 B</td><td>2.863555</td><td>1.777340</td><td>1.935507</td><td>0.000000</td><td></td></tr> <tr><td>10 B</td><td>3.025497</td><td>3.616179</td><td>3.354630</td><td>3.166377</td><td>0.000000</td></tr> <tr><td>11 B</td><td>1.725573</td><td>3.050414</td><td>1.966137</td><td>3.495567</td><td>2.939483</td></tr> </tbody> </table>  |          | 1        | 2        | 3        | 4 | 5 | 1 B | 0.000000 |  |  |  |  | 2 B | 1.804301 | 0.000000 |  |  |  | 3 Os | 3.309142 | 2.271794 | 0.000000 |  |  | 4 Os | 2.325407 | 3.152796 | 2.889194 | 0.000000 |  | 5 B  | 1.762317 | 2.953632 | 3.854131 | 2.059303 | 0.000000 | 6 B  | 2.858265 | 1.747829 | 2.273431 | 3.396886 | 2.974909 | 7 B | 3.895606 | 3.086792 | 2.105032 | 3.301128 | 3.547157 | 8 B | 2.865339 | 2.921071 | 2.991283 | 2.430728 | 1.881840 | 9 B | 3.644439 | 3.540302 | 2.266662 | 2.028030 | 3.106695 | 10 B | 1.781680 | 1.810455 | 2.142933 | 2.140428 | 3.016504 | 11 B  | 1.761631 | 1.820183 | 3.369118 | 3.086290 | 1.763290 |  | 6 | 7 | 8 | 9 | 10 | 6 B  | 0.000000 |  |  |  |  | 7 B | 1.709562 | 0.000000 |  |  |  | 8 B | 1.908811 | 1.828303 | 0.000000 |  |  | 9 B | 2.863555 | 1.777340 | 1.935507 | 0.000000 |  | 10 B | 3.025497 | 3.616179 | 3.354630 | 3.166377 | 0.000000 | 11 B  | 1.725573 | 3.050414 | 1.966137 | 3.495567 | 2.939483 |
|----------------------------------------------------------------------------------------------------------------------------------|----------------------------------------------------------------------------------------------------------------------------------------------------------------------------------------------------------------------------------------------------------------------------------------------------------------------------------------------------------------------------------------------------------------------------------------------------------------------------------------------------------------------------------------------------------------------------------------------------------------------------------------------------------------------------------------------------------------------------------------------------------------------------------------------------------------------------------------------------------------------------------------------------------------------------------------------------------------------------------------------------------------------------------------------------------------------------------------------------------------------------------------------------------------------------------------------------------------------------------------------------------------------------------------------------------------------------------------------------------------------------------------------------------------------------------------------------------------------------------------------------------------------------------------------------------------------------------------------------------------------------------------------------------------------------------------------------------------------------------------------------------------------------------------------------------------------------------------------------------------------------------------------------------------------------------------------------------|----------|----------|----------|----------|---|---|-----|----------|--|--|--|--|-----|----------|----------|--|--|--|------|----------|----------|----------|--|--|------|----------|----------|----------|----------|--|------|----------|----------|----------|----------|----------|------|----------|----------|----------|----------|----------|-----|----------|----------|----------|----------|----------|-----|----------|----------|----------|----------|----------|-----|----------|----------|----------|----------|----------|------|----------|----------|----------|----------|----------|-------|----------|----------|----------|----------|----------|--|---|---|---|---|----|------|----------|--|--|--|--|-----|----------|----------|--|--|--|-----|----------|----------|----------|--|--|-----|----------|----------|----------|----------|--|------|----------|----------|----------|----------|----------|-------|----------|----------|----------|----------|----------|
|                                                                                                                                  | 1                                                                                                                                                                                                                                                                                                                                                                                                                                                                                                                                                                                                                                                                                                                                                                                                                                                                                                                                                                                                                                                                                                                                                                                                                                                                                                                                                                                                                                                                                                                                                                                                                                                                                                                                                                                                                                                                                                                                                        | 2        | 3        | 4        | 5        |   |   |     |          |  |  |  |  |     |          |          |  |  |  |      |          |          |          |  |  |      |          |          |          |          |  |      |          |          |          |          |          |      |          |          |          |          |          |     |          |          |          |          |          |     |          |          |          |          |          |     |          |          |          |          |          |      |          |          |          |          |          |       |          |          |          |          |          |  |   |   |   |   |    |      |          |  |  |  |  |     |          |          |  |  |  |     |          |          |          |  |  |     |          |          |          |          |  |      |          |          |          |          |          |       |          |          |          |          |          |
| 1 B                                                                                                                              | 0.000000                                                                                                                                                                                                                                                                                                                                                                                                                                                                                                                                                                                                                                                                                                                                                                                                                                                                                                                                                                                                                                                                                                                                                                                                                                                                                                                                                                                                                                                                                                                                                                                                                                                                                                                                                                                                                                                                                                                                                 |          |          |          |          |   |   |     |          |  |  |  |  |     |          |          |  |  |  |      |          |          |          |  |  |      |          |          |          |          |  |      |          |          |          |          |          |      |          |          |          |          |          |     |          |          |          |          |          |     |          |          |          |          |          |     |          |          |          |          |          |      |          |          |          |          |          |       |          |          |          |          |          |  |   |   |   |   |    |      |          |  |  |  |  |     |          |          |  |  |  |     |          |          |          |  |  |     |          |          |          |          |  |      |          |          |          |          |          |       |          |          |          |          |          |
| 2 B                                                                                                                              | 1.804301                                                                                                                                                                                                                                                                                                                                                                                                                                                                                                                                                                                                                                                                                                                                                                                                                                                                                                                                                                                                                                                                                                                                                                                                                                                                                                                                                                                                                                                                                                                                                                                                                                                                                                                                                                                                                                                                                                                                                 | 0.000000 |          |          |          |   |   |     |          |  |  |  |  |     |          |          |  |  |  |      |          |          |          |  |  |      |          |          |          |          |  |      |          |          |          |          |          |      |          |          |          |          |          |     |          |          |          |          |          |     |          |          |          |          |          |     |          |          |          |          |          |      |          |          |          |          |          |       |          |          |          |          |          |  |   |   |   |   |    |      |          |  |  |  |  |     |          |          |  |  |  |     |          |          |          |  |  |     |          |          |          |          |  |      |          |          |          |          |          |       |          |          |          |          |          |
| 3 Os                                                                                                                             | 3.309142                                                                                                                                                                                                                                                                                                                                                                                                                                                                                                                                                                                                                                                                                                                                                                                                                                                                                                                                                                                                                                                                                                                                                                                                                                                                                                                                                                                                                                                                                                                                                                                                                                                                                                                                                                                                                                                                                                                                                 | 2.271794 | 0.000000 |          |          |   |   |     |          |  |  |  |  |     |          |          |  |  |  |      |          |          |          |  |  |      |          |          |          |          |  |      |          |          |          |          |          |      |          |          |          |          |          |     |          |          |          |          |          |     |          |          |          |          |          |     |          |          |          |          |          |      |          |          |          |          |          |       |          |          |          |          |          |  |   |   |   |   |    |      |          |  |  |  |  |     |          |          |  |  |  |     |          |          |          |  |  |     |          |          |          |          |  |      |          |          |          |          |          |       |          |          |          |          |          |
| 4 Os                                                                                                                             | 2.325407                                                                                                                                                                                                                                                                                                                                                                                                                                                                                                                                                                                                                                                                                                                                                                                                                                                                                                                                                                                                                                                                                                                                                                                                                                                                                                                                                                                                                                                                                                                                                                                                                                                                                                                                                                                                                                                                                                                                                 | 3.152796 | 2.889194 | 0.000000 |          |   |   |     |          |  |  |  |  |     |          |          |  |  |  |      |          |          |          |  |  |      |          |          |          |          |  |      |          |          |          |          |          |      |          |          |          |          |          |     |          |          |          |          |          |     |          |          |          |          |          |     |          |          |          |          |          |      |          |          |          |          |          |       |          |          |          |          |          |  |   |   |   |   |    |      |          |  |  |  |  |     |          |          |  |  |  |     |          |          |          |  |  |     |          |          |          |          |  |      |          |          |          |          |          |       |          |          |          |          |          |
| 5 B                                                                                                                              | 1.762317                                                                                                                                                                                                                                                                                                                                                                                                                                                                                                                                                                                                                                                                                                                                                                                                                                                                                                                                                                                                                                                                                                                                                                                                                                                                                                                                                                                                                                                                                                                                                                                                                                                                                                                                                                                                                                                                                                                                                 | 2.953632 | 3.854131 | 2.059303 | 0.000000 |   |   |     |          |  |  |  |  |     |          |          |  |  |  |      |          |          |          |  |  |      |          |          |          |          |  |      |          |          |          |          |          |      |          |          |          |          |          |     |          |          |          |          |          |     |          |          |          |          |          |     |          |          |          |          |          |      |          |          |          |          |          |       |          |          |          |          |          |  |   |   |   |   |    |      |          |  |  |  |  |     |          |          |  |  |  |     |          |          |          |  |  |     |          |          |          |          |  |      |          |          |          |          |          |       |          |          |          |          |          |
| 6 B                                                                                                                              | 2.858265                                                                                                                                                                                                                                                                                                                                                                                                                                                                                                                                                                                                                                                                                                                                                                                                                                                                                                                                                                                                                                                                                                                                                                                                                                                                                                                                                                                                                                                                                                                                                                                                                                                                                                                                                                                                                                                                                                                                                 | 1.747829 | 2.273431 | 3.396886 | 2.974909 |   |   |     |          |  |  |  |  |     |          |          |  |  |  |      |          |          |          |  |  |      |          |          |          |          |  |      |          |          |          |          |          |      |          |          |          |          |          |     |          |          |          |          |          |     |          |          |          |          |          |     |          |          |          |          |          |      |          |          |          |          |          |       |          |          |          |          |          |  |   |   |   |   |    |      |          |  |  |  |  |     |          |          |  |  |  |     |          |          |          |  |  |     |          |          |          |          |  |      |          |          |          |          |          |       |          |          |          |          |          |
| 7 B                                                                                                                              | 3.895606                                                                                                                                                                                                                                                                                                                                                                                                                                                                                                                                                                                                                                                                                                                                                                                                                                                                                                                                                                                                                                                                                                                                                                                                                                                                                                                                                                                                                                                                                                                                                                                                                                                                                                                                                                                                                                                                                                                                                 | 3.086792 | 2.105032 | 3.301128 | 3.547157 |   |   |     |          |  |  |  |  |     |          |          |  |  |  |      |          |          |          |  |  |      |          |          |          |          |  |      |          |          |          |          |          |      |          |          |          |          |          |     |          |          |          |          |          |     |          |          |          |          |          |     |          |          |          |          |          |      |          |          |          |          |          |       |          |          |          |          |          |  |   |   |   |   |    |      |          |  |  |  |  |     |          |          |  |  |  |     |          |          |          |  |  |     |          |          |          |          |  |      |          |          |          |          |          |       |          |          |          |          |          |
| 8 B                                                                                                                              | 2.865339                                                                                                                                                                                                                                                                                                                                                                                                                                                                                                                                                                                                                                                                                                                                                                                                                                                                                                                                                                                                                                                                                                                                                                                                                                                                                                                                                                                                                                                                                                                                                                                                                                                                                                                                                                                                                                                                                                                                                 | 2.921071 | 2.991283 | 2.430728 | 1.881840 |   |   |     |          |  |  |  |  |     |          |          |  |  |  |      |          |          |          |  |  |      |          |          |          |          |  |      |          |          |          |          |          |      |          |          |          |          |          |     |          |          |          |          |          |     |          |          |          |          |          |     |          |          |          |          |          |      |          |          |          |          |          |       |          |          |          |          |          |  |   |   |   |   |    |      |          |  |  |  |  |     |          |          |  |  |  |     |          |          |          |  |  |     |          |          |          |          |  |      |          |          |          |          |          |       |          |          |          |          |          |
| 9 B                                                                                                                              | 3.644439                                                                                                                                                                                                                                                                                                                                                                                                                                                                                                                                                                                                                                                                                                                                                                                                                                                                                                                                                                                                                                                                                                                                                                                                                                                                                                                                                                                                                                                                                                                                                                                                                                                                                                                                                                                                                                                                                                                                                 | 3.540302 | 2.266662 | 2.028030 | 3.106695 |   |   |     |          |  |  |  |  |     |          |          |  |  |  |      |          |          |          |  |  |      |          |          |          |          |  |      |          |          |          |          |          |      |          |          |          |          |          |     |          |          |          |          |          |     |          |          |          |          |          |     |          |          |          |          |          |      |          |          |          |          |          |       |          |          |          |          |          |  |   |   |   |   |    |      |          |  |  |  |  |     |          |          |  |  |  |     |          |          |          |  |  |     |          |          |          |          |  |      |          |          |          |          |          |       |          |          |          |          |          |
| 10 B                                                                                                                             | 1.781680                                                                                                                                                                                                                                                                                                                                                                                                                                                                                                                                                                                                                                                                                                                                                                                                                                                                                                                                                                                                                                                                                                                                                                                                                                                                                                                                                                                                                                                                                                                                                                                                                                                                                                                                                                                                                                                                                                                                                 | 1.810455 | 2.142933 | 2.140428 | 3.016504 |   |   |     |          |  |  |  |  |     |          |          |  |  |  |      |          |          |          |  |  |      |          |          |          |          |  |      |          |          |          |          |          |      |          |          |          |          |          |     |          |          |          |          |          |     |          |          |          |          |          |     |          |          |          |          |          |      |          |          |          |          |          |       |          |          |          |          |          |  |   |   |   |   |    |      |          |  |  |  |  |     |          |          |  |  |  |     |          |          |          |  |  |     |          |          |          |          |  |      |          |          |          |          |          |       |          |          |          |          |          |
| 11 B                                                                                                                             | 1.761631                                                                                                                                                                                                                                                                                                                                                                                                                                                                                                                                                                                                                                                                                                                                                                                                                                                                                                                                                                                                                                                                                                                                                                                                                                                                                                                                                                                                                                                                                                                                                                                                                                                                                                                                                                                                                                                                                                                                                 | 1.820183 | 3.369118 | 3.086290 | 1.763290 |   |   |     |          |  |  |  |  |     |          |          |  |  |  |      |          |          |          |  |  |      |          |          |          |          |  |      |          |          |          |          |          |      |          |          |          |          |          |     |          |          |          |          |          |     |          |          |          |          |          |     |          |          |          |          |          |      |          |          |          |          |          |       |          |          |          |          |          |  |   |   |   |   |    |      |          |  |  |  |  |     |          |          |  |  |  |     |          |          |          |  |  |     |          |          |          |          |  |      |          |          |          |          |          |       |          |          |          |          |          |
|                                                                                                                                  | 6                                                                                                                                                                                                                                                                                                                                                                                                                                                                                                                                                                                                                                                                                                                                                                                                                                                                                                                                                                                                                                                                                                                                                                                                                                                                                                                                                                                                                                                                                                                                                                                                                                                                                                                                                                                                                                                                                                                                                        | 7        | 8        | 9        | 10       |   |   |     |          |  |  |  |  |     |          |          |  |  |  |      |          |          |          |  |  |      |          |          |          |          |  |      |          |          |          |          |          |      |          |          |          |          |          |     |          |          |          |          |          |     |          |          |          |          |          |     |          |          |          |          |          |      |          |          |          |          |          |       |          |          |          |          |          |  |   |   |   |   |    |      |          |  |  |  |  |     |          |          |  |  |  |     |          |          |          |  |  |     |          |          |          |          |  |      |          |          |          |          |          |       |          |          |          |          |          |
| 6 B                                                                                                                              | 0.000000                                                                                                                                                                                                                                                                                                                                                                                                                                                                                                                                                                                                                                                                                                                                                                                                                                                                                                                                                                                                                                                                                                                                                                                                                                                                                                                                                                                                                                                                                                                                                                                                                                                                                                                                                                                                                                                                                                                                                 |          |          |          |          |   |   |     |          |  |  |  |  |     |          |          |  |  |  |      |          |          |          |  |  |      |          |          |          |          |  |      |          |          |          |          |          |      |          |          |          |          |          |     |          |          |          |          |          |     |          |          |          |          |          |     |          |          |          |          |          |      |          |          |          |          |          |       |          |          |          |          |          |  |   |   |   |   |    |      |          |  |  |  |  |     |          |          |  |  |  |     |          |          |          |  |  |     |          |          |          |          |  |      |          |          |          |          |          |       |          |          |          |          |          |
| 7 B                                                                                                                              | 1.709562                                                                                                                                                                                                                                                                                                                                                                                                                                                                                                                                                                                                                                                                                                                                                                                                                                                                                                                                                                                                                                                                                                                                                                                                                                                                                                                                                                                                                                                                                                                                                                                                                                                                                                                                                                                                                                                                                                                                                 | 0.000000 |          |          |          |   |   |     |          |  |  |  |  |     |          |          |  |  |  |      |          |          |          |  |  |      |          |          |          |          |  |      |          |          |          |          |          |      |          |          |          |          |          |     |          |          |          |          |          |     |          |          |          |          |          |     |          |          |          |          |          |      |          |          |          |          |          |       |          |          |          |          |          |  |   |   |   |   |    |      |          |  |  |  |  |     |          |          |  |  |  |     |          |          |          |  |  |     |          |          |          |          |  |      |          |          |          |          |          |       |          |          |          |          |          |
| 8 B                                                                                                                              | 1.908811                                                                                                                                                                                                                                                                                                                                                                                                                                                                                                                                                                                                                                                                                                                                                                                                                                                                                                                                                                                                                                                                                                                                                                                                                                                                                                                                                                                                                                                                                                                                                                                                                                                                                                                                                                                                                                                                                                                                                 | 1.828303 | 0.000000 |          |          |   |   |     |          |  |  |  |  |     |          |          |  |  |  |      |          |          |          |  |  |      |          |          |          |          |  |      |          |          |          |          |          |      |          |          |          |          |          |     |          |          |          |          |          |     |          |          |          |          |          |     |          |          |          |          |          |      |          |          |          |          |          |       |          |          |          |          |          |  |   |   |   |   |    |      |          |  |  |  |  |     |          |          |  |  |  |     |          |          |          |  |  |     |          |          |          |          |  |      |          |          |          |          |          |       |          |          |          |          |          |
| 9 B                                                                                                                              | 2.863555                                                                                                                                                                                                                                                                                                                                                                                                                                                                                                                                                                                                                                                                                                                                                                                                                                                                                                                                                                                                                                                                                                                                                                                                                                                                                                                                                                                                                                                                                                                                                                                                                                                                                                                                                                                                                                                                                                                                                 | 1.777340 | 1.935507 | 0.000000 |          |   |   |     |          |  |  |  |  |     |          |          |  |  |  |      |          |          |          |  |  |      |          |          |          |          |  |      |          |          |          |          |          |      |          |          |          |          |          |     |          |          |          |          |          |     |          |          |          |          |          |     |          |          |          |          |          |      |          |          |          |          |          |       |          |          |          |          |          |  |   |   |   |   |    |      |          |  |  |  |  |     |          |          |  |  |  |     |          |          |          |  |  |     |          |          |          |          |  |      |          |          |          |          |          |       |          |          |          |          |          |
| 10 B                                                                                                                             | 3.025497                                                                                                                                                                                                                                                                                                                                                                                                                                                                                                                                                                                                                                                                                                                                                                                                                                                                                                                                                                                                                                                                                                                                                                                                                                                                                                                                                                                                                                                                                                                                                                                                                                                                                                                                                                                                                                                                                                                                                 | 3.616179 | 3.354630 | 3.166377 | 0.000000 |   |   |     |          |  |  |  |  |     |          |          |  |  |  |      |          |          |          |  |  |      |          |          |          |          |  |      |          |          |          |          |          |      |          |          |          |          |          |     |          |          |          |          |          |     |          |          |          |          |          |     |          |          |          |          |          |      |          |          |          |          |          |       |          |          |          |          |          |  |   |   |   |   |    |      |          |  |  |  |  |     |          |          |  |  |  |     |          |          |          |  |  |     |          |          |          |          |  |      |          |          |          |          |          |       |          |          |          |          |          |
| 11 B                                                                                                                             | 1.725573                                                                                                                                                                                                                                                                                                                                                                                                                                                                                                                                                                                                                                                                                                                                                                                                                                                                                                                                                                                                                                                                                                                                                                                                                                                                                                                                                                                                                                                                                                                                                                                                                                                                                                                                                                                                                                                                                                                                                 | 3.050414 | 1.966137 | 3.495567 | 2.939483 |   |   |     |          |  |  |  |  |     |          |          |  |  |  |      |          |          |          |  |  |      |          |          |          |          |  |      |          |          |          |          |          |      |          |          |          |          |          |     |          |          |          |          |          |     |          |          |          |          |          |     |          |          |          |          |          |      |          |          |          |          |          |       |          |          |          |          |          |  |   |   |   |   |    |      |          |  |  |  |  |     |          |          |  |  |  |     |          |          |          |  |  |     |          |          |          |          |  |      |          |          |          |          |          |       |          |          |          |          |          |
|  <p>5. -797.76644029 +16.2 C<sub>2</sub></p>   | <table border="1"> <thead> <tr> <th></th> <th>1</th> <th>2</th> <th>3</th> <th>4</th> <th>5</th> </tr> </thead> <tbody> <tr><td>1 B</td><td>0.000000</td><td></td><td></td><td></td><td></td></tr> <tr><td>2 B</td><td>1.752221</td><td>0.000000</td><td></td><td></td><td></td></tr> <tr><td>3 B</td><td>4.056666</td><td>3.533498</td><td>0.000000</td><td></td><td></td></tr> <tr><td>4 B</td><td>3.112690</td><td>3.349475</td><td>1.842139</td><td>0.000000</td><td></td></tr> <tr><td>5 Os</td><td>2.060961</td><td>2.369679</td><td>3.481568</td><td>2.258163</td><td>0.000000</td></tr> <tr><td>6 B</td><td>1.842139</td><td>1.779367</td><td>3.112690</td><td>2.988102</td><td>3.101497</td></tr> <tr><td>7 B</td><td>1.804461</td><td>2.757938</td><td>2.965537</td><td>1.759884</td><td>2.282677</td></tr> <tr><td>8 B</td><td>3.017950</td><td>1.754959</td><td>3.017950</td><td>3.064914</td><td>2.168010</td></tr> <tr><td>9 B</td><td>2.965537</td><td>2.989392</td><td>1.804461</td><td>1.916167</td><td>3.312315</td></tr> <tr><td>10 B</td><td>3.533498</td><td>2.902622</td><td>1.752221</td><td>1.779367</td><td>2.231290</td></tr> <tr><td>11 Os</td><td>3.481568</td><td>2.231290</td><td>2.060961</td><td>3.101497</td><td>3.530976</td></tr> <tr> <td></td> <td>6</td> <td>7</td> <td>8</td> <td>9</td> <td>10</td> </tr> <tr><td>6 B</td><td>0.000000</td><td></td><td></td><td></td><td></td></tr> <tr><td>7 B</td><td>1.916167</td><td>0.000000</td><td></td><td></td><td></td></tr> <tr><td>8 B</td><td>3.064914</td><td>3.425388</td><td>0.000000</td><td></td><td></td></tr> <tr><td>9 B</td><td>1.759884</td><td>1.725179</td><td>3.425388</td><td>0.000000</td><td></td></tr> <tr><td>10 B</td><td>3.349475</td><td>2.989392</td><td>1.754959</td><td>2.757938</td><td>0.000000</td></tr> <tr><td>11 Os</td><td>2.258163</td><td>3.312315</td><td>2.168010</td><td>2.282677</td><td>2.369679</td></tr> </tbody> </table> |          | 1        | 2        | 3        | 4 | 5 | 1 B | 0.000000 |  |  |  |  | 2 B | 1.752221 | 0.000000 |  |  |  | 3 B  | 4.056666 | 3.533498 | 0.000000 |  |  | 4 B  | 3.112690 | 3.349475 | 1.842139 | 0.000000 |  | 5 Os | 2.060961 | 2.369679 | 3.481568 | 2.258163 | 0.000000 | 6 B  | 1.842139 | 1.779367 | 3.112690 | 2.988102 | 3.101497 | 7 B | 1.804461 | 2.757938 | 2.965537 | 1.759884 | 2.282677 | 8 B | 3.017950 | 1.754959 | 3.017950 | 3.064914 | 2.168010 | 9 B | 2.965537 | 2.989392 | 1.804461 | 1.916167 | 3.312315 | 10 B | 3.533498 | 2.902622 | 1.752221 | 1.779367 | 2.231290 | 11 Os | 3.481568 | 2.231290 | 2.060961 | 3.101497 | 3.530976 |  | 6 | 7 | 8 | 9 | 10 | 6 B  | 0.000000 |  |  |  |  | 7 B | 1.916167 | 0.000000 |  |  |  | 8 B | 3.064914 | 3.425388 | 0.000000 |  |  | 9 B | 1.759884 | 1.725179 | 3.425388 | 0.000000 |  | 10 B | 3.349475 | 2.989392 | 1.754959 | 2.757938 | 0.000000 | 11 Os | 2.258163 | 3.312315 | 2.168010 | 2.282677 | 2.369679 |
|                                                                                                                                  | 1                                                                                                                                                                                                                                                                                                                                                                                                                                                                                                                                                                                                                                                                                                                                                                                                                                                                                                                                                                                                                                                                                                                                                                                                                                                                                                                                                                                                                                                                                                                                                                                                                                                                                                                                                                                                                                                                                                                                                        | 2        | 3        | 4        | 5        |   |   |     |          |  |  |  |  |     |          |          |  |  |  |      |          |          |          |  |  |      |          |          |          |          |  |      |          |          |          |          |          |      |          |          |          |          |          |     |          |          |          |          |          |     |          |          |          |          |          |     |          |          |          |          |          |      |          |          |          |          |          |       |          |          |          |          |          |  |   |   |   |   |    |      |          |  |  |  |  |     |          |          |  |  |  |     |          |          |          |  |  |     |          |          |          |          |  |      |          |          |          |          |          |       |          |          |          |          |          |
| 1 B                                                                                                                              | 0.000000                                                                                                                                                                                                                                                                                                                                                                                                                                                                                                                                                                                                                                                                                                                                                                                                                                                                                                                                                                                                                                                                                                                                                                                                                                                                                                                                                                                                                                                                                                                                                                                                                                                                                                                                                                                                                                                                                                                                                 |          |          |          |          |   |   |     |          |  |  |  |  |     |          |          |  |  |  |      |          |          |          |  |  |      |          |          |          |          |  |      |          |          |          |          |          |      |          |          |          |          |          |     |          |          |          |          |          |     |          |          |          |          |          |     |          |          |          |          |          |      |          |          |          |          |          |       |          |          |          |          |          |  |   |   |   |   |    |      |          |  |  |  |  |     |          |          |  |  |  |     |          |          |          |  |  |     |          |          |          |          |  |      |          |          |          |          |          |       |          |          |          |          |          |
| 2 B                                                                                                                              | 1.752221                                                                                                                                                                                                                                                                                                                                                                                                                                                                                                                                                                                                                                                                                                                                                                                                                                                                                                                                                                                                                                                                                                                                                                                                                                                                                                                                                                                                                                                                                                                                                                                                                                                                                                                                                                                                                                                                                                                                                 | 0.000000 |          |          |          |   |   |     |          |  |  |  |  |     |          |          |  |  |  |      |          |          |          |  |  |      |          |          |          |          |  |      |          |          |          |          |          |      |          |          |          |          |          |     |          |          |          |          |          |     |          |          |          |          |          |     |          |          |          |          |          |      |          |          |          |          |          |       |          |          |          |          |          |  |   |   |   |   |    |      |          |  |  |  |  |     |          |          |  |  |  |     |          |          |          |  |  |     |          |          |          |          |  |      |          |          |          |          |          |       |          |          |          |          |          |
| 3 B                                                                                                                              | 4.056666                                                                                                                                                                                                                                                                                                                                                                                                                                                                                                                                                                                                                                                                                                                                                                                                                                                                                                                                                                                                                                                                                                                                                                                                                                                                                                                                                                                                                                                                                                                                                                                                                                                                                                                                                                                                                                                                                                                                                 | 3.533498 | 0.000000 |          |          |   |   |     |          |  |  |  |  |     |          |          |  |  |  |      |          |          |          |  |  |      |          |          |          |          |  |      |          |          |          |          |          |      |          |          |          |          |          |     |          |          |          |          |          |     |          |          |          |          |          |     |          |          |          |          |          |      |          |          |          |          |          |       |          |          |          |          |          |  |   |   |   |   |    |      |          |  |  |  |  |     |          |          |  |  |  |     |          |          |          |  |  |     |          |          |          |          |  |      |          |          |          |          |          |       |          |          |          |          |          |
| 4 B                                                                                                                              | 3.112690                                                                                                                                                                                                                                                                                                                                                                                                                                                                                                                                                                                                                                                                                                                                                                                                                                                                                                                                                                                                                                                                                                                                                                                                                                                                                                                                                                                                                                                                                                                                                                                                                                                                                                                                                                                                                                                                                                                                                 | 3.349475 | 1.842139 | 0.000000 |          |   |   |     |          |  |  |  |  |     |          |          |  |  |  |      |          |          |          |  |  |      |          |          |          |          |  |      |          |          |          |          |          |      |          |          |          |          |          |     |          |          |          |          |          |     |          |          |          |          |          |     |          |          |          |          |          |      |          |          |          |          |          |       |          |          |          |          |          |  |   |   |   |   |    |      |          |  |  |  |  |     |          |          |  |  |  |     |          |          |          |  |  |     |          |          |          |          |  |      |          |          |          |          |          |       |          |          |          |          |          |
| 5 Os                                                                                                                             | 2.060961                                                                                                                                                                                                                                                                                                                                                                                                                                                                                                                                                                                                                                                                                                                                                                                                                                                                                                                                                                                                                                                                                                                                                                                                                                                                                                                                                                                                                                                                                                                                                                                                                                                                                                                                                                                                                                                                                                                                                 | 2.369679 | 3.481568 | 2.258163 | 0.000000 |   |   |     |          |  |  |  |  |     |          |          |  |  |  |      |          |          |          |  |  |      |          |          |          |          |  |      |          |          |          |          |          |      |          |          |          |          |          |     |          |          |          |          |          |     |          |          |          |          |          |     |          |          |          |          |          |      |          |          |          |          |          |       |          |          |          |          |          |  |   |   |   |   |    |      |          |  |  |  |  |     |          |          |  |  |  |     |          |          |          |  |  |     |          |          |          |          |  |      |          |          |          |          |          |       |          |          |          |          |          |
| 6 B                                                                                                                              | 1.842139                                                                                                                                                                                                                                                                                                                                                                                                                                                                                                                                                                                                                                                                                                                                                                                                                                                                                                                                                                                                                                                                                                                                                                                                                                                                                                                                                                                                                                                                                                                                                                                                                                                                                                                                                                                                                                                                                                                                                 | 1.779367 | 3.112690 | 2.988102 | 3.101497 |   |   |     |          |  |  |  |  |     |          |          |  |  |  |      |          |          |          |  |  |      |          |          |          |          |  |      |          |          |          |          |          |      |          |          |          |          |          |     |          |          |          |          |          |     |          |          |          |          |          |     |          |          |          |          |          |      |          |          |          |          |          |       |          |          |          |          |          |  |   |   |   |   |    |      |          |  |  |  |  |     |          |          |  |  |  |     |          |          |          |  |  |     |          |          |          |          |  |      |          |          |          |          |          |       |          |          |          |          |          |
| 7 B                                                                                                                              | 1.804461                                                                                                                                                                                                                                                                                                                                                                                                                                                                                                                                                                                                                                                                                                                                                                                                                                                                                                                                                                                                                                                                                                                                                                                                                                                                                                                                                                                                                                                                                                                                                                                                                                                                                                                                                                                                                                                                                                                                                 | 2.757938 | 2.965537 | 1.759884 | 2.282677 |   |   |     |          |  |  |  |  |     |          |          |  |  |  |      |          |          |          |  |  |      |          |          |          |          |  |      |          |          |          |          |          |      |          |          |          |          |          |     |          |          |          |          |          |     |          |          |          |          |          |     |          |          |          |          |          |      |          |          |          |          |          |       |          |          |          |          |          |  |   |   |   |   |    |      |          |  |  |  |  |     |          |          |  |  |  |     |          |          |          |  |  |     |          |          |          |          |  |      |          |          |          |          |          |       |          |          |          |          |          |
| 8 B                                                                                                                              | 3.017950                                                                                                                                                                                                                                                                                                                                                                                                                                                                                                                                                                                                                                                                                                                                                                                                                                                                                                                                                                                                                                                                                                                                                                                                                                                                                                                                                                                                                                                                                                                                                                                                                                                                                                                                                                                                                                                                                                                                                 | 1.754959 | 3.017950 | 3.064914 | 2.168010 |   |   |     |          |  |  |  |  |     |          |          |  |  |  |      |          |          |          |  |  |      |          |          |          |          |  |      |          |          |          |          |          |      |          |          |          |          |          |     |          |          |          |          |          |     |          |          |          |          |          |     |          |          |          |          |          |      |          |          |          |          |          |       |          |          |          |          |          |  |   |   |   |   |    |      |          |  |  |  |  |     |          |          |  |  |  |     |          |          |          |  |  |     |          |          |          |          |  |      |          |          |          |          |          |       |          |          |          |          |          |
| 9 B                                                                                                                              | 2.965537                                                                                                                                                                                                                                                                                                                                                                                                                                                                                                                                                                                                                                                                                                                                                                                                                                                                                                                                                                                                                                                                                                                                                                                                                                                                                                                                                                                                                                                                                                                                                                                                                                                                                                                                                                                                                                                                                                                                                 | 2.989392 | 1.804461 | 1.916167 | 3.312315 |   |   |     |          |  |  |  |  |     |          |          |  |  |  |      |          |          |          |  |  |      |          |          |          |          |  |      |          |          |          |          |          |      |          |          |          |          |          |     |          |          |          |          |          |     |          |          |          |          |          |     |          |          |          |          |          |      |          |          |          |          |          |       |          |          |          |          |          |  |   |   |   |   |    |      |          |  |  |  |  |     |          |          |  |  |  |     |          |          |          |  |  |     |          |          |          |          |  |      |          |          |          |          |          |       |          |          |          |          |          |
| 10 B                                                                                                                             | 3.533498                                                                                                                                                                                                                                                                                                                                                                                                                                                                                                                                                                                                                                                                                                                                                                                                                                                                                                                                                                                                                                                                                                                                                                                                                                                                                                                                                                                                                                                                                                                                                                                                                                                                                                                                                                                                                                                                                                                                                 | 2.902622 | 1.752221 | 1.779367 | 2.231290 |   |   |     |          |  |  |  |  |     |          |          |  |  |  |      |          |          |          |  |  |      |          |          |          |          |  |      |          |          |          |          |          |      |          |          |          |          |          |     |          |          |          |          |          |     |          |          |          |          |          |     |          |          |          |          |          |      |          |          |          |          |          |       |          |          |          |          |          |  |   |   |   |   |    |      |          |  |  |  |  |     |          |          |  |  |  |     |          |          |          |  |  |     |          |          |          |          |  |      |          |          |          |          |          |       |          |          |          |          |          |
| 11 Os                                                                                                                            | 3.481568                                                                                                                                                                                                                                                                                                                                                                                                                                                                                                                                                                                                                                                                                                                                                                                                                                                                                                                                                                                                                                                                                                                                                                                                                                                                                                                                                                                                                                                                                                                                                                                                                                                                                                                                                                                                                                                                                                                                                 | 2.231290 | 2.060961 | 3.101497 | 3.530976 |   |   |     |          |  |  |  |  |     |          |          |  |  |  |      |          |          |          |  |  |      |          |          |          |          |  |      |          |          |          |          |          |      |          |          |          |          |          |     |          |          |          |          |          |     |          |          |          |          |          |     |          |          |          |          |          |      |          |          |          |          |          |       |          |          |          |          |          |  |   |   |   |   |    |      |          |  |  |  |  |     |          |          |  |  |  |     |          |          |          |  |  |     |          |          |          |          |  |      |          |          |          |          |          |       |          |          |          |          |          |
|                                                                                                                                  | 6                                                                                                                                                                                                                                                                                                                                                                                                                                                                                                                                                                                                                                                                                                                                                                                                                                                                                                                                                                                                                                                                                                                                                                                                                                                                                                                                                                                                                                                                                                                                                                                                                                                                                                                                                                                                                                                                                                                                                        | 7        | 8        | 9        | 10       |   |   |     |          |  |  |  |  |     |          |          |  |  |  |      |          |          |          |  |  |      |          |          |          |          |  |      |          |          |          |          |          |      |          |          |          |          |          |     |          |          |          |          |          |     |          |          |          |          |          |     |          |          |          |          |          |      |          |          |          |          |          |       |          |          |          |          |          |  |   |   |   |   |    |      |          |  |  |  |  |     |          |          |  |  |  |     |          |          |          |  |  |     |          |          |          |          |  |      |          |          |          |          |          |       |          |          |          |          |          |
| 6 B                                                                                                                              | 0.000000                                                                                                                                                                                                                                                                                                                                                                                                                                                                                                                                                                                                                                                                                                                                                                                                                                                                                                                                                                                                                                                                                                                                                                                                                                                                                                                                                                                                                                                                                                                                                                                                                                                                                                                                                                                                                                                                                                                                                 |          |          |          |          |   |   |     |          |  |  |  |  |     |          |          |  |  |  |      |          |          |          |  |  |      |          |          |          |          |  |      |          |          |          |          |          |      |          |          |          |          |          |     |          |          |          |          |          |     |          |          |          |          |          |     |          |          |          |          |          |      |          |          |          |          |          |       |          |          |          |          |          |  |   |   |   |   |    |      |          |  |  |  |  |     |          |          |  |  |  |     |          |          |          |  |  |     |          |          |          |          |  |      |          |          |          |          |          |       |          |          |          |          |          |
| 7 B                                                                                                                              | 1.916167                                                                                                                                                                                                                                                                                                                                                                                                                                                                                                                                                                                                                                                                                                                                                                                                                                                                                                                                                                                                                                                                                                                                                                                                                                                                                                                                                                                                                                                                                                                                                                                                                                                                                                                                                                                                                                                                                                                                                 | 0.000000 |          |          |          |   |   |     |          |  |  |  |  |     |          |          |  |  |  |      |          |          |          |  |  |      |          |          |          |          |  |      |          |          |          |          |          |      |          |          |          |          |          |     |          |          |          |          |          |     |          |          |          |          |          |     |          |          |          |          |          |      |          |          |          |          |          |       |          |          |          |          |          |  |   |   |   |   |    |      |          |  |  |  |  |     |          |          |  |  |  |     |          |          |          |  |  |     |          |          |          |          |  |      |          |          |          |          |          |       |          |          |          |          |          |
| 8 B                                                                                                                              | 3.064914                                                                                                                                                                                                                                                                                                                                                                                                                                                                                                                                                                                                                                                                                                                                                                                                                                                                                                                                                                                                                                                                                                                                                                                                                                                                                                                                                                                                                                                                                                                                                                                                                                                                                                                                                                                                                                                                                                                                                 | 3.425388 | 0.000000 |          |          |   |   |     |          |  |  |  |  |     |          |          |  |  |  |      |          |          |          |  |  |      |          |          |          |          |  |      |          |          |          |          |          |      |          |          |          |          |          |     |          |          |          |          |          |     |          |          |          |          |          |     |          |          |          |          |          |      |          |          |          |          |          |       |          |          |          |          |          |  |   |   |   |   |    |      |          |  |  |  |  |     |          |          |  |  |  |     |          |          |          |  |  |     |          |          |          |          |  |      |          |          |          |          |          |       |          |          |          |          |          |
| 9 B                                                                                                                              | 1.759884                                                                                                                                                                                                                                                                                                                                                                                                                                                                                                                                                                                                                                                                                                                                                                                                                                                                                                                                                                                                                                                                                                                                                                                                                                                                                                                                                                                                                                                                                                                                                                                                                                                                                                                                                                                                                                                                                                                                                 | 1.725179 | 3.425388 | 0.000000 |          |   |   |     |          |  |  |  |  |     |          |          |  |  |  |      |          |          |          |  |  |      |          |          |          |          |  |      |          |          |          |          |          |      |          |          |          |          |          |     |          |          |          |          |          |     |          |          |          |          |          |     |          |          |          |          |          |      |          |          |          |          |          |       |          |          |          |          |          |  |   |   |   |   |    |      |          |  |  |  |  |     |          |          |  |  |  |     |          |          |          |  |  |     |          |          |          |          |  |      |          |          |          |          |          |       |          |          |          |          |          |
| 10 B                                                                                                                             | 3.349475                                                                                                                                                                                                                                                                                                                                                                                                                                                                                                                                                                                                                                                                                                                                                                                                                                                                                                                                                                                                                                                                                                                                                                                                                                                                                                                                                                                                                                                                                                                                                                                                                                                                                                                                                                                                                                                                                                                                                 | 2.989392 | 1.754959 | 2.757938 | 0.000000 |   |   |     |          |  |  |  |  |     |          |          |  |  |  |      |          |          |          |  |  |      |          |          |          |          |  |      |          |          |          |          |          |      |          |          |          |          |          |     |          |          |          |          |          |     |          |          |          |          |          |     |          |          |          |          |          |      |          |          |          |          |          |       |          |          |          |          |          |  |   |   |   |   |    |      |          |  |  |  |  |     |          |          |  |  |  |     |          |          |          |  |  |     |          |          |          |          |  |      |          |          |          |          |          |       |          |          |          |          |          |
| 11 Os                                                                                                                            | 2.258163                                                                                                                                                                                                                                                                                                                                                                                                                                                                                                                                                                                                                                                                                                                                                                                                                                                                                                                                                                                                                                                                                                                                                                                                                                                                                                                                                                                                                                                                                                                                                                                                                                                                                                                                                                                                                                                                                                                                                 | 3.312315 | 2.168010 | 2.282677 | 2.369679 |   |   |     |          |  |  |  |  |     |          |          |  |  |  |      |          |          |          |  |  |      |          |          |          |          |  |      |          |          |          |          |          |      |          |          |          |          |          |     |          |          |          |          |          |     |          |          |          |          |          |     |          |          |          |          |          |      |          |          |          |          |          |       |          |          |          |          |          |  |   |   |   |   |    |      |          |  |  |  |  |     |          |          |  |  |  |     |          |          |          |  |  |     |          |          |          |          |  |      |          |          |          |          |          |       |          |          |          |          |          |
|  <p>6. -797.76643994 +16.2 C<sub>2v</sub></p> | <table border="1"> <thead> <tr> <th></th> <th>1</th> <th>2</th> <th>3</th> <th>4</th> <th>5</th> </tr> </thead> <tbody> <tr><td>1 B</td><td>0.000000</td><td></td><td></td><td></td><td></td></tr> <tr><td>2 B</td><td>2.947600</td><td>0.000000</td><td></td><td></td><td></td></tr> <tr><td>3 B</td><td>3.387342</td><td>1.657712</td><td>0.000000</td><td></td><td></td></tr> <tr><td>4 B</td><td>1.657712</td><td>3.387342</td><td>2.960400</td><td>0.000000</td><td></td></tr> <tr><td>5 Os</td><td>2.158115</td><td>2.159608</td><td>2.213828</td><td>2.212865</td><td>0.000000</td></tr> <tr><td>6 Os</td><td>2.159608</td><td>2.158115</td><td>2.212865</td><td>2.213828</td><td>2.761801</td></tr> <tr><td>7 B</td><td>3.983962</td><td>3.184750</td><td>1.709898</td><td>2.945587</td><td>3.356855</td></tr> <tr><td>8 B</td><td>3.184750</td><td>3.983962</td><td>2.945587</td><td>1.709898</td><td>2.490201</td></tr> <tr><td>9 B</td><td>4.309355</td><td>4.309355</td><td>2.812774</td><td>2.812774</td><td>3.565100</td></tr> <tr><td>10 B</td><td>3.984384</td><td>3.185301</td><td>1.709913</td><td>2.946070</td><td>2.491599</td></tr> <tr><td>11 B</td><td>3.185301</td><td>3.984384</td><td>2.946070</td><td>1.709913</td><td>3.356569</td></tr> <tr> <td></td> <td>6</td> <td>7</td> <td>8</td> <td>9</td> <td>10</td> </tr> <tr><td>6 Os</td><td>0.000000</td><td></td><td></td><td></td><td></td></tr> <tr><td>7 B</td><td>2.490201</td><td>0.000000</td><td></td><td></td><td></td></tr> <tr><td>8 B</td><td>3.356855</td><td>2.671879</td><td>0.000000</td><td></td><td></td></tr> <tr><td>9 B</td><td>3.565100</td><td>1.693701</td><td>1.693701</td><td>0.000000</td><td></td></tr> <tr><td>10 B</td><td>3.356569</td><td>1.833200</td><td>1.943700</td><td>1.693281</td><td>0.000000</td></tr> <tr><td>11 B</td><td>2.491599</td><td>1.943700</td><td>1.833200</td><td>1.693281</td><td>2.671750</td></tr> </tbody> </table> |          | 1        | 2        | 3        | 4 | 5 | 1 B | 0.000000 |  |  |  |  | 2 B | 2.947600 | 0.000000 |  |  |  | 3 B  | 3.387342 | 1.657712 | 0.000000 |  |  | 4 B  | 1.657712 | 3.387342 | 2.960400 | 0.000000 |  | 5 Os | 2.158115 | 2.159608 | 2.213828 | 2.212865 | 0.000000 | 6 Os | 2.159608 | 2.158115 | 2.212865 | 2.213828 | 2.761801 | 7 B | 3.983962 | 3.184750 | 1.709898 | 2.945587 | 3.356855 | 8 B | 3.184750 | 3.983962 | 2.945587 | 1.709898 | 2.490201 | 9 B | 4.309355 | 4.309355 | 2.812774 | 2.812774 | 3.565100 | 10 B | 3.984384 | 3.185301 | 1.709913 | 2.946070 | 2.491599 | 11 B  | 3.185301 | 3.984384 | 2.946070 | 1.709913 | 3.356569 |  | 6 | 7 | 8 | 9 | 10 | 6 Os | 0.000000 |  |  |  |  | 7 B | 2.490201 | 0.000000 |  |  |  | 8 B | 3.356855 | 2.671879 | 0.000000 |  |  | 9 B | 3.565100 | 1.693701 | 1.693701 | 0.000000 |  | 10 B | 3.356569 | 1.833200 | 1.943700 | 1.693281 | 0.000000 | 11 B  | 2.491599 | 1.943700 | 1.833200 | 1.693281 | 2.671750 |
|                                                                                                                                  | 1                                                                                                                                                                                                                                                                                                                                                                                                                                                                                                                                                                                                                                                                                                                                                                                                                                                                                                                                                                                                                                                                                                                                                                                                                                                                                                                                                                                                                                                                                                                                                                                                                                                                                                                                                                                                                                                                                                                                                        | 2        | 3        | 4        | 5        |   |   |     |          |  |  |  |  |     |          |          |  |  |  |      |          |          |          |  |  |      |          |          |          |          |  |      |          |          |          |          |          |      |          |          |          |          |          |     |          |          |          |          |          |     |          |          |          |          |          |     |          |          |          |          |          |      |          |          |          |          |          |       |          |          |          |          |          |  |   |   |   |   |    |      |          |  |  |  |  |     |          |          |  |  |  |     |          |          |          |  |  |     |          |          |          |          |  |      |          |          |          |          |          |       |          |          |          |          |          |
| 1 B                                                                                                                              | 0.000000                                                                                                                                                                                                                                                                                                                                                                                                                                                                                                                                                                                                                                                                                                                                                                                                                                                                                                                                                                                                                                                                                                                                                                                                                                                                                                                                                                                                                                                                                                                                                                                                                                                                                                                                                                                                                                                                                                                                                 |          |          |          |          |   |   |     |          |  |  |  |  |     |          |          |  |  |  |      |          |          |          |  |  |      |          |          |          |          |  |      |          |          |          |          |          |      |          |          |          |          |          |     |          |          |          |          |          |     |          |          |          |          |          |     |          |          |          |          |          |      |          |          |          |          |          |       |          |          |          |          |          |  |   |   |   |   |    |      |          |  |  |  |  |     |          |          |  |  |  |     |          |          |          |  |  |     |          |          |          |          |  |      |          |          |          |          |          |       |          |          |          |          |          |
| 2 B                                                                                                                              | 2.947600                                                                                                                                                                                                                                                                                                                                                                                                                                                                                                                                                                                                                                                                                                                                                                                                                                                                                                                                                                                                                                                                                                                                                                                                                                                                                                                                                                                                                                                                                                                                                                                                                                                                                                                                                                                                                                                                                                                                                 | 0.000000 |          |          |          |   |   |     |          |  |  |  |  |     |          |          |  |  |  |      |          |          |          |  |  |      |          |          |          |          |  |      |          |          |          |          |          |      |          |          |          |          |          |     |          |          |          |          |          |     |          |          |          |          |          |     |          |          |          |          |          |      |          |          |          |          |          |       |          |          |          |          |          |  |   |   |   |   |    |      |          |  |  |  |  |     |          |          |  |  |  |     |          |          |          |  |  |     |          |          |          |          |  |      |          |          |          |          |          |       |          |          |          |          |          |
| 3 B                                                                                                                              | 3.387342                                                                                                                                                                                                                                                                                                                                                                                                                                                                                                                                                                                                                                                                                                                                                                                                                                                                                                                                                                                                                                                                                                                                                                                                                                                                                                                                                                                                                                                                                                                                                                                                                                                                                                                                                                                                                                                                                                                                                 | 1.657712 | 0.000000 |          |          |   |   |     |          |  |  |  |  |     |          |          |  |  |  |      |          |          |          |  |  |      |          |          |          |          |  |      |          |          |          |          |          |      |          |          |          |          |          |     |          |          |          |          |          |     |          |          |          |          |          |     |          |          |          |          |          |      |          |          |          |          |          |       |          |          |          |          |          |  |   |   |   |   |    |      |          |  |  |  |  |     |          |          |  |  |  |     |          |          |          |  |  |     |          |          |          |          |  |      |          |          |          |          |          |       |          |          |          |          |          |
| 4 B                                                                                                                              | 1.657712                                                                                                                                                                                                                                                                                                                                                                                                                                                                                                                                                                                                                                                                                                                                                                                                                                                                                                                                                                                                                                                                                                                                                                                                                                                                                                                                                                                                                                                                                                                                                                                                                                                                                                                                                                                                                                                                                                                                                 | 3.387342 | 2.960400 | 0.000000 |          |   |   |     |          |  |  |  |  |     |          |          |  |  |  |      |          |          |          |  |  |      |          |          |          |          |  |      |          |          |          |          |          |      |          |          |          |          |          |     |          |          |          |          |          |     |          |          |          |          |          |     |          |          |          |          |          |      |          |          |          |          |          |       |          |          |          |          |          |  |   |   |   |   |    |      |          |  |  |  |  |     |          |          |  |  |  |     |          |          |          |  |  |     |          |          |          |          |  |      |          |          |          |          |          |       |          |          |          |          |          |
| 5 Os                                                                                                                             | 2.158115                                                                                                                                                                                                                                                                                                                                                                                                                                                                                                                                                                                                                                                                                                                                                                                                                                                                                                                                                                                                                                                                                                                                                                                                                                                                                                                                                                                                                                                                                                                                                                                                                                                                                                                                                                                                                                                                                                                                                 | 2.159608 | 2.213828 | 2.212865 | 0.000000 |   |   |     |          |  |  |  |  |     |          |          |  |  |  |      |          |          |          |  |  |      |          |          |          |          |  |      |          |          |          |          |          |      |          |          |          |          |          |     |          |          |          |          |          |     |          |          |          |          |          |     |          |          |          |          |          |      |          |          |          |          |          |       |          |          |          |          |          |  |   |   |   |   |    |      |          |  |  |  |  |     |          |          |  |  |  |     |          |          |          |  |  |     |          |          |          |          |  |      |          |          |          |          |          |       |          |          |          |          |          |
| 6 Os                                                                                                                             | 2.159608                                                                                                                                                                                                                                                                                                                                                                                                                                                                                                                                                                                                                                                                                                                                                                                                                                                                                                                                                                                                                                                                                                                                                                                                                                                                                                                                                                                                                                                                                                                                                                                                                                                                                                                                                                                                                                                                                                                                                 | 2.158115 | 2.212865 | 2.213828 | 2.761801 |   |   |     |          |  |  |  |  |     |          |          |  |  |  |      |          |          |          |  |  |      |          |          |          |          |  |      |          |          |          |          |          |      |          |          |          |          |          |     |          |          |          |          |          |     |          |          |          |          |          |     |          |          |          |          |          |      |          |          |          |          |          |       |          |          |          |          |          |  |   |   |   |   |    |      |          |  |  |  |  |     |          |          |  |  |  |     |          |          |          |  |  |     |          |          |          |          |  |      |          |          |          |          |          |       |          |          |          |          |          |
| 7 B                                                                                                                              | 3.983962                                                                                                                                                                                                                                                                                                                                                                                                                                                                                                                                                                                                                                                                                                                                                                                                                                                                                                                                                                                                                                                                                                                                                                                                                                                                                                                                                                                                                                                                                                                                                                                                                                                                                                                                                                                                                                                                                                                                                 | 3.184750 | 1.709898 | 2.945587 | 3.356855 |   |   |     |          |  |  |  |  |     |          |          |  |  |  |      |          |          |          |  |  |      |          |          |          |          |  |      |          |          |          |          |          |      |          |          |          |          |          |     |          |          |          |          |          |     |          |          |          |          |          |     |          |          |          |          |          |      |          |          |          |          |          |       |          |          |          |          |          |  |   |   |   |   |    |      |          |  |  |  |  |     |          |          |  |  |  |     |          |          |          |  |  |     |          |          |          |          |  |      |          |          |          |          |          |       |          |          |          |          |          |
| 8 B                                                                                                                              | 3.184750                                                                                                                                                                                                                                                                                                                                                                                                                                                                                                                                                                                                                                                                                                                                                                                                                                                                                                                                                                                                                                                                                                                                                                                                                                                                                                                                                                                                                                                                                                                                                                                                                                                                                                                                                                                                                                                                                                                                                 | 3.983962 | 2.945587 | 1.709898 | 2.490201 |   |   |     |          |  |  |  |  |     |          |          |  |  |  |      |          |          |          |  |  |      |          |          |          |          |  |      |          |          |          |          |          |      |          |          |          |          |          |     |          |          |          |          |          |     |          |          |          |          |          |     |          |          |          |          |          |      |          |          |          |          |          |       |          |          |          |          |          |  |   |   |   |   |    |      |          |  |  |  |  |     |          |          |  |  |  |     |          |          |          |  |  |     |          |          |          |          |  |      |          |          |          |          |          |       |          |          |          |          |          |
| 9 B                                                                                                                              | 4.309355                                                                                                                                                                                                                                                                                                                                                                                                                                                                                                                                                                                                                                                                                                                                                                                                                                                                                                                                                                                                                                                                                                                                                                                                                                                                                                                                                                                                                                                                                                                                                                                                                                                                                                                                                                                                                                                                                                                                                 | 4.309355 | 2.812774 | 2.812774 | 3.565100 |   |   |     |          |  |  |  |  |     |          |          |  |  |  |      |          |          |          |  |  |      |          |          |          |          |  |      |          |          |          |          |          |      |          |          |          |          |          |     |          |          |          |          |          |     |          |          |          |          |          |     |          |          |          |          |          |      |          |          |          |          |          |       |          |          |          |          |          |  |   |   |   |   |    |      |          |  |  |  |  |     |          |          |  |  |  |     |          |          |          |  |  |     |          |          |          |          |  |      |          |          |          |          |          |       |          |          |          |          |          |
| 10 B                                                                                                                             | 3.984384                                                                                                                                                                                                                                                                                                                                                                                                                                                                                                                                                                                                                                                                                                                                                                                                                                                                                                                                                                                                                                                                                                                                                                                                                                                                                                                                                                                                                                                                                                                                                                                                                                                                                                                                                                                                                                                                                                                                                 | 3.185301 | 1.709913 | 2.946070 | 2.491599 |   |   |     |          |  |  |  |  |     |          |          |  |  |  |      |          |          |          |  |  |      |          |          |          |          |  |      |          |          |          |          |          |      |          |          |          |          |          |     |          |          |          |          |          |     |          |          |          |          |          |     |          |          |          |          |          |      |          |          |          |          |          |       |          |          |          |          |          |  |   |   |   |   |    |      |          |  |  |  |  |     |          |          |  |  |  |     |          |          |          |  |  |     |          |          |          |          |  |      |          |          |          |          |          |       |          |          |          |          |          |
| 11 B                                                                                                                             | 3.185301                                                                                                                                                                                                                                                                                                                                                                                                                                                                                                                                                                                                                                                                                                                                                                                                                                                                                                                                                                                                                                                                                                                                                                                                                                                                                                                                                                                                                                                                                                                                                                                                                                                                                                                                                                                                                                                                                                                                                 | 3.984384 | 2.946070 | 1.709913 | 3.356569 |   |   |     |          |  |  |  |  |     |          |          |  |  |  |      |          |          |          |  |  |      |          |          |          |          |  |      |          |          |          |          |          |      |          |          |          |          |          |     |          |          |          |          |          |     |          |          |          |          |          |     |          |          |          |          |          |      |          |          |          |          |          |       |          |          |          |          |          |  |   |   |   |   |    |      |          |  |  |  |  |     |          |          |  |  |  |     |          |          |          |  |  |     |          |          |          |          |  |      |          |          |          |          |          |       |          |          |          |          |          |
|                                                                                                                                  | 6                                                                                                                                                                                                                                                                                                                                                                                                                                                                                                                                                                                                                                                                                                                                                                                                                                                                                                                                                                                                                                                                                                                                                                                                                                                                                                                                                                                                                                                                                                                                                                                                                                                                                                                                                                                                                                                                                                                                                        | 7        | 8        | 9        | 10       |   |   |     |          |  |  |  |  |     |          |          |  |  |  |      |          |          |          |  |  |      |          |          |          |          |  |      |          |          |          |          |          |      |          |          |          |          |          |     |          |          |          |          |          |     |          |          |          |          |          |     |          |          |          |          |          |      |          |          |          |          |          |       |          |          |          |          |          |  |   |   |   |   |    |      |          |  |  |  |  |     |          |          |  |  |  |     |          |          |          |  |  |     |          |          |          |          |  |      |          |          |          |          |          |       |          |          |          |          |          |
| 6 Os                                                                                                                             | 0.000000                                                                                                                                                                                                                                                                                                                                                                                                                                                                                                                                                                                                                                                                                                                                                                                                                                                                                                                                                                                                                                                                                                                                                                                                                                                                                                                                                                                                                                                                                                                                                                                                                                                                                                                                                                                                                                                                                                                                                 |          |          |          |          |   |   |     |          |  |  |  |  |     |          |          |  |  |  |      |          |          |          |  |  |      |          |          |          |          |  |      |          |          |          |          |          |      |          |          |          |          |          |     |          |          |          |          |          |     |          |          |          |          |          |     |          |          |          |          |          |      |          |          |          |          |          |       |          |          |          |          |          |  |   |   |   |   |    |      |          |  |  |  |  |     |          |          |  |  |  |     |          |          |          |  |  |     |          |          |          |          |  |      |          |          |          |          |          |       |          |          |          |          |          |
| 7 B                                                                                                                              | 2.490201                                                                                                                                                                                                                                                                                                                                                                                                                                                                                                                                                                                                                                                                                                                                                                                                                                                                                                                                                                                                                                                                                                                                                                                                                                                                                                                                                                                                                                                                                                                                                                                                                                                                                                                                                                                                                                                                                                                                                 | 0.000000 |          |          |          |   |   |     |          |  |  |  |  |     |          |          |  |  |  |      |          |          |          |  |  |      |          |          |          |          |  |      |          |          |          |          |          |      |          |          |          |          |          |     |          |          |          |          |          |     |          |          |          |          |          |     |          |          |          |          |          |      |          |          |          |          |          |       |          |          |          |          |          |  |   |   |   |   |    |      |          |  |  |  |  |     |          |          |  |  |  |     |          |          |          |  |  |     |          |          |          |          |  |      |          |          |          |          |          |       |          |          |          |          |          |
| 8 B                                                                                                                              | 3.356855                                                                                                                                                                                                                                                                                                                                                                                                                                                                                                                                                                                                                                                                                                                                                                                                                                                                                                                                                                                                                                                                                                                                                                                                                                                                                                                                                                                                                                                                                                                                                                                                                                                                                                                                                                                                                                                                                                                                                 | 2.671879 | 0.000000 |          |          |   |   |     |          |  |  |  |  |     |          |          |  |  |  |      |          |          |          |  |  |      |          |          |          |          |  |      |          |          |          |          |          |      |          |          |          |          |          |     |          |          |          |          |          |     |          |          |          |          |          |     |          |          |          |          |          |      |          |          |          |          |          |       |          |          |          |          |          |  |   |   |   |   |    |      |          |  |  |  |  |     |          |          |  |  |  |     |          |          |          |  |  |     |          |          |          |          |  |      |          |          |          |          |          |       |          |          |          |          |          |
| 9 B                                                                                                                              | 3.565100                                                                                                                                                                                                                                                                                                                                                                                                                                                                                                                                                                                                                                                                                                                                                                                                                                                                                                                                                                                                                                                                                                                                                                                                                                                                                                                                                                                                                                                                                                                                                                                                                                                                                                                                                                                                                                                                                                                                                 | 1.693701 | 1.693701 | 0.000000 |          |   |   |     |          |  |  |  |  |     |          |          |  |  |  |      |          |          |          |  |  |      |          |          |          |          |  |      |          |          |          |          |          |      |          |          |          |          |          |     |          |          |          |          |          |     |          |          |          |          |          |     |          |          |          |          |          |      |          |          |          |          |          |       |          |          |          |          |          |  |   |   |   |   |    |      |          |  |  |  |  |     |          |          |  |  |  |     |          |          |          |  |  |     |          |          |          |          |  |      |          |          |          |          |          |       |          |          |          |          |          |
| 10 B                                                                                                                             | 3.356569                                                                                                                                                                                                                                                                                                                                                                                                                                                                                                                                                                                                                                                                                                                                                                                                                                                                                                                                                                                                                                                                                                                                                                                                                                                                                                                                                                                                                                                                                                                                                                                                                                                                                                                                                                                                                                                                                                                                                 | 1.833200 | 1.943700 | 1.693281 | 0.000000 |   |   |     |          |  |  |  |  |     |          |          |  |  |  |      |          |          |          |  |  |      |          |          |          |          |  |      |          |          |          |          |          |      |          |          |          |          |          |     |          |          |          |          |          |     |          |          |          |          |          |     |          |          |          |          |          |      |          |          |          |          |          |       |          |          |          |          |          |  |   |   |   |   |    |      |          |  |  |  |  |     |          |          |  |  |  |     |          |          |          |  |  |     |          |          |          |          |  |      |          |          |          |          |          |       |          |          |          |          |          |
| 11 B                                                                                                                             | 2.491599                                                                                                                                                                                                                                                                                                                                                                                                                                                                                                                                                                                                                                                                                                                                                                                                                                                                                                                                                                                                                                                                                                                                                                                                                                                                                                                                                                                                                                                                                                                                                                                                                                                                                                                                                                                                                                                                                                                                                 | 1.943700 | 1.833200 | 1.693281 | 2.671750 |   |   |     |          |  |  |  |  |     |          |          |  |  |  |      |          |          |          |  |  |      |          |          |          |          |  |      |          |          |          |          |          |      |          |          |          |          |          |     |          |          |          |          |          |     |          |          |          |          |          |     |          |          |          |          |          |      |          |          |          |          |          |       |          |          |          |          |          |  |   |   |   |   |    |      |          |  |  |  |  |     |          |          |  |  |  |     |          |          |          |  |  |     |          |          |          |          |  |      |          |          |          |          |          |       |          |          |          |          |          |

| 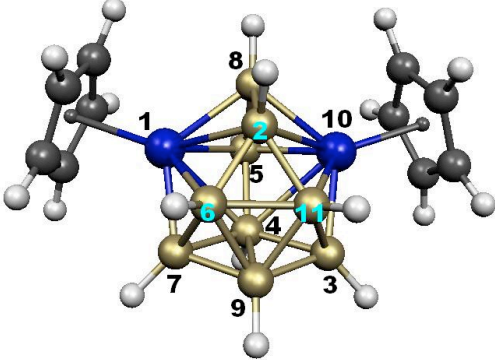 <p>7. -797.76643994 +17.8 C<sub>s</sub></p> | <table border="1"> <thead> <tr> <th></th> <th>1</th> <th>2</th> <th>3</th> <th>4</th> <th>5</th> </tr> </thead> <tbody> <tr><td>1 Os</td><td>0.000000</td><td></td><td></td><td></td><td></td></tr> <tr><td>2 B</td><td>2.316972</td><td>0.000000</td><td></td><td></td><td></td></tr> <tr><td>3 B</td><td>3.772363</td><td>2.987079</td><td>0.000000</td><td></td><td></td></tr> <tr><td>4 B</td><td>2.417730</td><td>2.915289</td><td>1.855723</td><td>0.000000</td><td></td></tr> <tr><td>5 B</td><td>2.152702</td><td>2.861873</td><td>3.108959</td><td>1.839496</td><td>0.000000</td></tr> <tr><td>6 B</td><td>2.293717</td><td>1.759310</td><td>2.931247</td><td>2.702037</td><td>3.522798</td></tr> <tr><td>7 B</td><td>2.063222</td><td>2.987079</td><td>2.934000</td><td>1.855723</td><td>3.108959</td></tr> <tr><td>8 B</td><td>2.137462</td><td>1.745833</td><td>3.628660</td><td>2.976422</td><td>1.821554</td></tr> <tr><td>9 B</td><td>3.245272</td><td>2.865562</td><td>1.724552</td><td>2.032495</td><td>3.615135</td></tr> <tr><td>10 Os</td><td>3.399400</td><td>2.316972</td><td>2.063222</td><td>2.417730</td><td>2.152702</td></tr> <tr><td>11 B</td><td>3.404629</td><td>1.759310</td><td>1.768761</td><td>2.702037</td><td>3.522798</td></tr> <tr> <td></td> <td>6</td> <td>7</td> <td>8</td> <td>9</td> <td>10</td> </tr> <tr><td>6 B</td><td>0.000000</td><td></td><td></td><td></td><td></td></tr> <tr><td>7 B</td><td>1.768761</td><td>0.000000</td><td></td><td></td><td></td></tr> <tr><td>8 B</td><td>3.136441</td><td>3.628660</td><td>0.000000</td><td></td><td></td></tr> <tr><td>9 B</td><td>1.797710</td><td>1.724552</td><td>3.952424</td><td>0.000000</td><td></td></tr> <tr><td>10 Os</td><td>3.404629</td><td>3.772363</td><td>2.137462</td><td>3.245272</td><td>0.000000</td></tr> <tr><td>11 B</td><td>1.862200</td><td>2.931247</td><td>3.136441</td><td>1.797710</td><td>2.293717</td></tr> </tbody> </table>  |          | 1        | 2        | 3        | 4 | 5 | 1 Os | 0.000000 |  |  |  |  | 2 B | 2.316972 | 0.000000 |  |  |  | 3 B  | 3.772363 | 2.987079 | 0.000000 |  |  | 4 B | 2.417730 | 2.915289 | 1.855723 | 0.000000 |  | 5 B | 2.152702 | 2.861873 | 3.108959 | 1.839496 | 0.000000 | 6 B  | 2.293717 | 1.759310 | 2.931247 | 2.702037 | 3.522798 | 7 B | 2.063222 | 2.987079 | 2.934000 | 1.855723 | 3.108959 | 8 B | 2.137462 | 1.745833 | 3.628660 | 2.976422 | 1.821554 | 9 B | 3.245272 | 2.865562 | 1.724552 | 2.032495 | 3.615135 | 10 Os | 3.399400 | 2.316972 | 2.063222 | 2.417730 | 2.152702 | 11 B  | 3.404629 | 1.759310 | 1.768761 | 2.702037 | 3.522798 |  | 6 | 7 | 8 | 9 | 10 | 6 B  | 0.000000 |  |  |  |  | 7 B | 1.768761 | 0.000000 |  |  |  | 8 B | 3.136441 | 3.628660 | 0.000000 |  |  | 9 B | 1.797710 | 1.724552 | 3.952424 | 0.000000 |  | 10 Os | 3.404629 | 3.772363 | 2.137462 | 3.245272 | 0.000000 | 11 B  | 1.862200 | 2.931247 | 3.136441 | 1.797710 | 2.293717 |
|-------------------------------------------------------------------------------------------------------------------------------|-----------------------------------------------------------------------------------------------------------------------------------------------------------------------------------------------------------------------------------------------------------------------------------------------------------------------------------------------------------------------------------------------------------------------------------------------------------------------------------------------------------------------------------------------------------------------------------------------------------------------------------------------------------------------------------------------------------------------------------------------------------------------------------------------------------------------------------------------------------------------------------------------------------------------------------------------------------------------------------------------------------------------------------------------------------------------------------------------------------------------------------------------------------------------------------------------------------------------------------------------------------------------------------------------------------------------------------------------------------------------------------------------------------------------------------------------------------------------------------------------------------------------------------------------------------------------------------------------------------------------------------------------------------------------------------------------------------------------------------------------------------------------------------------------------------------------------------------------------------------------------------------------------------------------------------------------------------|----------|----------|----------|----------|---|---|------|----------|--|--|--|--|-----|----------|----------|--|--|--|------|----------|----------|----------|--|--|-----|----------|----------|----------|----------|--|-----|----------|----------|----------|----------|----------|------|----------|----------|----------|----------|----------|-----|----------|----------|----------|----------|----------|-----|----------|----------|----------|----------|----------|-----|----------|----------|----------|----------|----------|-------|----------|----------|----------|----------|----------|-------|----------|----------|----------|----------|----------|--|---|---|---|---|----|------|----------|--|--|--|--|-----|----------|----------|--|--|--|-----|----------|----------|----------|--|--|-----|----------|----------|----------|----------|--|-------|----------|----------|----------|----------|----------|-------|----------|----------|----------|----------|----------|
|                                                                                                                               | 1                                                                                                                                                                                                                                                                                                                                                                                                                                                                                                                                                                                                                                                                                                                                                                                                                                                                                                                                                                                                                                                                                                                                                                                                                                                                                                                                                                                                                                                                                                                                                                                                                                                                                                                                                                                                                                                                                                                                                         | 2        | 3        | 4        | 5        |   |   |      |          |  |  |  |  |     |          |          |  |  |  |      |          |          |          |  |  |     |          |          |          |          |  |     |          |          |          |          |          |      |          |          |          |          |          |     |          |          |          |          |          |     |          |          |          |          |          |     |          |          |          |          |          |       |          |          |          |          |          |       |          |          |          |          |          |  |   |   |   |   |    |      |          |  |  |  |  |     |          |          |  |  |  |     |          |          |          |  |  |     |          |          |          |          |  |       |          |          |          |          |          |       |          |          |          |          |          |
| 1 Os                                                                                                                          | 0.000000                                                                                                                                                                                                                                                                                                                                                                                                                                                                                                                                                                                                                                                                                                                                                                                                                                                                                                                                                                                                                                                                                                                                                                                                                                                                                                                                                                                                                                                                                                                                                                                                                                                                                                                                                                                                                                                                                                                                                  |          |          |          |          |   |   |      |          |  |  |  |  |     |          |          |  |  |  |      |          |          |          |  |  |     |          |          |          |          |  |     |          |          |          |          |          |      |          |          |          |          |          |     |          |          |          |          |          |     |          |          |          |          |          |     |          |          |          |          |          |       |          |          |          |          |          |       |          |          |          |          |          |  |   |   |   |   |    |      |          |  |  |  |  |     |          |          |  |  |  |     |          |          |          |  |  |     |          |          |          |          |  |       |          |          |          |          |          |       |          |          |          |          |          |
| 2 B                                                                                                                           | 2.316972                                                                                                                                                                                                                                                                                                                                                                                                                                                                                                                                                                                                                                                                                                                                                                                                                                                                                                                                                                                                                                                                                                                                                                                                                                                                                                                                                                                                                                                                                                                                                                                                                                                                                                                                                                                                                                                                                                                                                  | 0.000000 |          |          |          |   |   |      |          |  |  |  |  |     |          |          |  |  |  |      |          |          |          |  |  |     |          |          |          |          |  |     |          |          |          |          |          |      |          |          |          |          |          |     |          |          |          |          |          |     |          |          |          |          |          |     |          |          |          |          |          |       |          |          |          |          |          |       |          |          |          |          |          |  |   |   |   |   |    |      |          |  |  |  |  |     |          |          |  |  |  |     |          |          |          |  |  |     |          |          |          |          |  |       |          |          |          |          |          |       |          |          |          |          |          |
| 3 B                                                                                                                           | 3.772363                                                                                                                                                                                                                                                                                                                                                                                                                                                                                                                                                                                                                                                                                                                                                                                                                                                                                                                                                                                                                                                                                                                                                                                                                                                                                                                                                                                                                                                                                                                                                                                                                                                                                                                                                                                                                                                                                                                                                  | 2.987079 | 0.000000 |          |          |   |   |      |          |  |  |  |  |     |          |          |  |  |  |      |          |          |          |  |  |     |          |          |          |          |  |     |          |          |          |          |          |      |          |          |          |          |          |     |          |          |          |          |          |     |          |          |          |          |          |     |          |          |          |          |          |       |          |          |          |          |          |       |          |          |          |          |          |  |   |   |   |   |    |      |          |  |  |  |  |     |          |          |  |  |  |     |          |          |          |  |  |     |          |          |          |          |  |       |          |          |          |          |          |       |          |          |          |          |          |
| 4 B                                                                                                                           | 2.417730                                                                                                                                                                                                                                                                                                                                                                                                                                                                                                                                                                                                                                                                                                                                                                                                                                                                                                                                                                                                                                                                                                                                                                                                                                                                                                                                                                                                                                                                                                                                                                                                                                                                                                                                                                                                                                                                                                                                                  | 2.915289 | 1.855723 | 0.000000 |          |   |   |      |          |  |  |  |  |     |          |          |  |  |  |      |          |          |          |  |  |     |          |          |          |          |  |     |          |          |          |          |          |      |          |          |          |          |          |     |          |          |          |          |          |     |          |          |          |          |          |     |          |          |          |          |          |       |          |          |          |          |          |       |          |          |          |          |          |  |   |   |   |   |    |      |          |  |  |  |  |     |          |          |  |  |  |     |          |          |          |  |  |     |          |          |          |          |  |       |          |          |          |          |          |       |          |          |          |          |          |
| 5 B                                                                                                                           | 2.152702                                                                                                                                                                                                                                                                                                                                                                                                                                                                                                                                                                                                                                                                                                                                                                                                                                                                                                                                                                                                                                                                                                                                                                                                                                                                                                                                                                                                                                                                                                                                                                                                                                                                                                                                                                                                                                                                                                                                                  | 2.861873 | 3.108959 | 1.839496 | 0.000000 |   |   |      |          |  |  |  |  |     |          |          |  |  |  |      |          |          |          |  |  |     |          |          |          |          |  |     |          |          |          |          |          |      |          |          |          |          |          |     |          |          |          |          |          |     |          |          |          |          |          |     |          |          |          |          |          |       |          |          |          |          |          |       |          |          |          |          |          |  |   |   |   |   |    |      |          |  |  |  |  |     |          |          |  |  |  |     |          |          |          |  |  |     |          |          |          |          |  |       |          |          |          |          |          |       |          |          |          |          |          |
| 6 B                                                                                                                           | 2.293717                                                                                                                                                                                                                                                                                                                                                                                                                                                                                                                                                                                                                                                                                                                                                                                                                                                                                                                                                                                                                                                                                                                                                                                                                                                                                                                                                                                                                                                                                                                                                                                                                                                                                                                                                                                                                                                                                                                                                  | 1.759310 | 2.931247 | 2.702037 | 3.522798 |   |   |      |          |  |  |  |  |     |          |          |  |  |  |      |          |          |          |  |  |     |          |          |          |          |  |     |          |          |          |          |          |      |          |          |          |          |          |     |          |          |          |          |          |     |          |          |          |          |          |     |          |          |          |          |          |       |          |          |          |          |          |       |          |          |          |          |          |  |   |   |   |   |    |      |          |  |  |  |  |     |          |          |  |  |  |     |          |          |          |  |  |     |          |          |          |          |  |       |          |          |          |          |          |       |          |          |          |          |          |
| 7 B                                                                                                                           | 2.063222                                                                                                                                                                                                                                                                                                                                                                                                                                                                                                                                                                                                                                                                                                                                                                                                                                                                                                                                                                                                                                                                                                                                                                                                                                                                                                                                                                                                                                                                                                                                                                                                                                                                                                                                                                                                                                                                                                                                                  | 2.987079 | 2.934000 | 1.855723 | 3.108959 |   |   |      |          |  |  |  |  |     |          |          |  |  |  |      |          |          |          |  |  |     |          |          |          |          |  |     |          |          |          |          |          |      |          |          |          |          |          |     |          |          |          |          |          |     |          |          |          |          |          |     |          |          |          |          |          |       |          |          |          |          |          |       |          |          |          |          |          |  |   |   |   |   |    |      |          |  |  |  |  |     |          |          |  |  |  |     |          |          |          |  |  |     |          |          |          |          |  |       |          |          |          |          |          |       |          |          |          |          |          |
| 8 B                                                                                                                           | 2.137462                                                                                                                                                                                                                                                                                                                                                                                                                                                                                                                                                                                                                                                                                                                                                                                                                                                                                                                                                                                                                                                                                                                                                                                                                                                                                                                                                                                                                                                                                                                                                                                                                                                                                                                                                                                                                                                                                                                                                  | 1.745833 | 3.628660 | 2.976422 | 1.821554 |   |   |      |          |  |  |  |  |     |          |          |  |  |  |      |          |          |          |  |  |     |          |          |          |          |  |     |          |          |          |          |          |      |          |          |          |          |          |     |          |          |          |          |          |     |          |          |          |          |          |     |          |          |          |          |          |       |          |          |          |          |          |       |          |          |          |          |          |  |   |   |   |   |    |      |          |  |  |  |  |     |          |          |  |  |  |     |          |          |          |  |  |     |          |          |          |          |  |       |          |          |          |          |          |       |          |          |          |          |          |
| 9 B                                                                                                                           | 3.245272                                                                                                                                                                                                                                                                                                                                                                                                                                                                                                                                                                                                                                                                                                                                                                                                                                                                                                                                                                                                                                                                                                                                                                                                                                                                                                                                                                                                                                                                                                                                                                                                                                                                                                                                                                                                                                                                                                                                                  | 2.865562 | 1.724552 | 2.032495 | 3.615135 |   |   |      |          |  |  |  |  |     |          |          |  |  |  |      |          |          |          |  |  |     |          |          |          |          |  |     |          |          |          |          |          |      |          |          |          |          |          |     |          |          |          |          |          |     |          |          |          |          |          |     |          |          |          |          |          |       |          |          |          |          |          |       |          |          |          |          |          |  |   |   |   |   |    |      |          |  |  |  |  |     |          |          |  |  |  |     |          |          |          |  |  |     |          |          |          |          |  |       |          |          |          |          |          |       |          |          |          |          |          |
| 10 Os                                                                                                                         | 3.399400                                                                                                                                                                                                                                                                                                                                                                                                                                                                                                                                                                                                                                                                                                                                                                                                                                                                                                                                                                                                                                                                                                                                                                                                                                                                                                                                                                                                                                                                                                                                                                                                                                                                                                                                                                                                                                                                                                                                                  | 2.316972 | 2.063222 | 2.417730 | 2.152702 |   |   |      |          |  |  |  |  |     |          |          |  |  |  |      |          |          |          |  |  |     |          |          |          |          |  |     |          |          |          |          |          |      |          |          |          |          |          |     |          |          |          |          |          |     |          |          |          |          |          |     |          |          |          |          |          |       |          |          |          |          |          |       |          |          |          |          |          |  |   |   |   |   |    |      |          |  |  |  |  |     |          |          |  |  |  |     |          |          |          |  |  |     |          |          |          |          |  |       |          |          |          |          |          |       |          |          |          |          |          |
| 11 B                                                                                                                          | 3.404629                                                                                                                                                                                                                                                                                                                                                                                                                                                                                                                                                                                                                                                                                                                                                                                                                                                                                                                                                                                                                                                                                                                                                                                                                                                                                                                                                                                                                                                                                                                                                                                                                                                                                                                                                                                                                                                                                                                                                  | 1.759310 | 1.768761 | 2.702037 | 3.522798 |   |   |      |          |  |  |  |  |     |          |          |  |  |  |      |          |          |          |  |  |     |          |          |          |          |  |     |          |          |          |          |          |      |          |          |          |          |          |     |          |          |          |          |          |     |          |          |          |          |          |     |          |          |          |          |          |       |          |          |          |          |          |       |          |          |          |          |          |  |   |   |   |   |    |      |          |  |  |  |  |     |          |          |  |  |  |     |          |          |          |  |  |     |          |          |          |          |  |       |          |          |          |          |          |       |          |          |          |          |          |
|                                                                                                                               | 6                                                                                                                                                                                                                                                                                                                                                                                                                                                                                                                                                                                                                                                                                                                                                                                                                                                                                                                                                                                                                                                                                                                                                                                                                                                                                                                                                                                                                                                                                                                                                                                                                                                                                                                                                                                                                                                                                                                                                         | 7        | 8        | 9        | 10       |   |   |      |          |  |  |  |  |     |          |          |  |  |  |      |          |          |          |  |  |     |          |          |          |          |  |     |          |          |          |          |          |      |          |          |          |          |          |     |          |          |          |          |          |     |          |          |          |          |          |     |          |          |          |          |          |       |          |          |          |          |          |       |          |          |          |          |          |  |   |   |   |   |    |      |          |  |  |  |  |     |          |          |  |  |  |     |          |          |          |  |  |     |          |          |          |          |  |       |          |          |          |          |          |       |          |          |          |          |          |
| 6 B                                                                                                                           | 0.000000                                                                                                                                                                                                                                                                                                                                                                                                                                                                                                                                                                                                                                                                                                                                                                                                                                                                                                                                                                                                                                                                                                                                                                                                                                                                                                                                                                                                                                                                                                                                                                                                                                                                                                                                                                                                                                                                                                                                                  |          |          |          |          |   |   |      |          |  |  |  |  |     |          |          |  |  |  |      |          |          |          |  |  |     |          |          |          |          |  |     |          |          |          |          |          |      |          |          |          |          |          |     |          |          |          |          |          |     |          |          |          |          |          |     |          |          |          |          |          |       |          |          |          |          |          |       |          |          |          |          |          |  |   |   |   |   |    |      |          |  |  |  |  |     |          |          |  |  |  |     |          |          |          |  |  |     |          |          |          |          |  |       |          |          |          |          |          |       |          |          |          |          |          |
| 7 B                                                                                                                           | 1.768761                                                                                                                                                                                                                                                                                                                                                                                                                                                                                                                                                                                                                                                                                                                                                                                                                                                                                                                                                                                                                                                                                                                                                                                                                                                                                                                                                                                                                                                                                                                                                                                                                                                                                                                                                                                                                                                                                                                                                  | 0.000000 |          |          |          |   |   |      |          |  |  |  |  |     |          |          |  |  |  |      |          |          |          |  |  |     |          |          |          |          |  |     |          |          |          |          |          |      |          |          |          |          |          |     |          |          |          |          |          |     |          |          |          |          |          |     |          |          |          |          |          |       |          |          |          |          |          |       |          |          |          |          |          |  |   |   |   |   |    |      |          |  |  |  |  |     |          |          |  |  |  |     |          |          |          |  |  |     |          |          |          |          |  |       |          |          |          |          |          |       |          |          |          |          |          |
| 8 B                                                                                                                           | 3.136441                                                                                                                                                                                                                                                                                                                                                                                                                                                                                                                                                                                                                                                                                                                                                                                                                                                                                                                                                                                                                                                                                                                                                                                                                                                                                                                                                                                                                                                                                                                                                                                                                                                                                                                                                                                                                                                                                                                                                  | 3.628660 | 0.000000 |          |          |   |   |      |          |  |  |  |  |     |          |          |  |  |  |      |          |          |          |  |  |     |          |          |          |          |  |     |          |          |          |          |          |      |          |          |          |          |          |     |          |          |          |          |          |     |          |          |          |          |          |     |          |          |          |          |          |       |          |          |          |          |          |       |          |          |          |          |          |  |   |   |   |   |    |      |          |  |  |  |  |     |          |          |  |  |  |     |          |          |          |  |  |     |          |          |          |          |  |       |          |          |          |          |          |       |          |          |          |          |          |
| 9 B                                                                                                                           | 1.797710                                                                                                                                                                                                                                                                                                                                                                                                                                                                                                                                                                                                                                                                                                                                                                                                                                                                                                                                                                                                                                                                                                                                                                                                                                                                                                                                                                                                                                                                                                                                                                                                                                                                                                                                                                                                                                                                                                                                                  | 1.724552 | 3.952424 | 0.000000 |          |   |   |      |          |  |  |  |  |     |          |          |  |  |  |      |          |          |          |  |  |     |          |          |          |          |  |     |          |          |          |          |          |      |          |          |          |          |          |     |          |          |          |          |          |     |          |          |          |          |          |     |          |          |          |          |          |       |          |          |          |          |          |       |          |          |          |          |          |  |   |   |   |   |    |      |          |  |  |  |  |     |          |          |  |  |  |     |          |          |          |  |  |     |          |          |          |          |  |       |          |          |          |          |          |       |          |          |          |          |          |
| 10 Os                                                                                                                         | 3.404629                                                                                                                                                                                                                                                                                                                                                                                                                                                                                                                                                                                                                                                                                                                                                                                                                                                                                                                                                                                                                                                                                                                                                                                                                                                                                                                                                                                                                                                                                                                                                                                                                                                                                                                                                                                                                                                                                                                                                  | 3.772363 | 2.137462 | 3.245272 | 0.000000 |   |   |      |          |  |  |  |  |     |          |          |  |  |  |      |          |          |          |  |  |     |          |          |          |          |  |     |          |          |          |          |          |      |          |          |          |          |          |     |          |          |          |          |          |     |          |          |          |          |          |     |          |          |          |          |          |       |          |          |          |          |          |       |          |          |          |          |          |  |   |   |   |   |    |      |          |  |  |  |  |     |          |          |  |  |  |     |          |          |          |  |  |     |          |          |          |          |  |       |          |          |          |          |          |       |          |          |          |          |          |
| 11 B                                                                                                                          | 1.862200                                                                                                                                                                                                                                                                                                                                                                                                                                                                                                                                                                                                                                                                                                                                                                                                                                                                                                                                                                                                                                                                                                                                                                                                                                                                                                                                                                                                                                                                                                                                                                                                                                                                                                                                                                                                                                                                                                                                                  | 2.931247 | 3.136441 | 1.797710 | 2.293717 |   |   |      |          |  |  |  |  |     |          |          |  |  |  |      |          |          |          |  |  |     |          |          |          |          |  |     |          |          |          |          |          |      |          |          |          |          |          |     |          |          |          |          |          |     |          |          |          |          |          |     |          |          |          |          |          |       |          |          |          |          |          |       |          |          |          |          |          |  |   |   |   |   |    |      |          |  |  |  |  |     |          |          |  |  |  |     |          |          |          |  |  |     |          |          |          |          |  |       |          |          |          |          |          |       |          |          |          |          |          |
|  <p>8. -797.76361798 +18.0</p>              | <table border="1"> <thead> <tr> <th></th> <th>1</th> <th>2</th> <th>3</th> <th>4</th> <th>5</th> </tr> </thead> <tbody> <tr><td>1 B</td><td>0.000000</td><td></td><td></td><td></td><td></td></tr> <tr><td>2 B</td><td>1.782607</td><td>0.000000</td><td></td><td></td><td></td></tr> <tr><td>3 B</td><td>2.014403</td><td>2.702437</td><td>0.000000</td><td></td><td></td></tr> <tr><td>4 B</td><td>2.982045</td><td>3.058464</td><td>3.048022</td><td>0.000000</td><td></td></tr> <tr><td>5 B</td><td>2.745548</td><td>1.794890</td><td>2.788946</td><td>1.837526</td><td>0.000000</td></tr> <tr><td>6 Os</td><td>3.466554</td><td>3.489660</td><td>2.200177</td><td>2.073304</td><td>2.252331</td></tr> <tr><td>7 B</td><td>4.140394</td><td>3.122255</td><td>3.419548</td><td>2.871869</td><td>1.668946</td></tr> <tr><td>8 B</td><td>1.753868</td><td>1.859583</td><td>2.906839</td><td>1.720552</td><td>1.842719</td></tr> <tr><td>9 B</td><td>1.807155</td><td>2.848595</td><td>1.830567</td><td>1.784546</td><td>2.570972</td></tr> <tr><td>10 B</td><td>1.694232</td><td>1.782182</td><td>1.800458</td><td>3.904610</td><td>2.948926</td></tr> <tr><td>11 Os</td><td>3.184240</td><td>2.296187</td><td>2.318486</td><td>3.704987</td><td>2.256745</td></tr> <tr> <td></td> <td>6</td> <td>7</td> <td>8</td> <td>9</td> <td>10</td> </tr> <tr><td>6 Os</td><td>0.000000</td><td></td><td></td><td></td><td></td></tr> <tr><td>7 B</td><td>2.171288</td><td>0.000000</td><td></td><td></td><td></td></tr> <tr><td>8 B</td><td>3.133757</td><td>3.477699</td><td>0.000000</td><td></td><td></td></tr> <tr><td>9 B</td><td>2.280602</td><td>3.715358</td><td>1.808502</td><td>0.000000</td><td></td></tr> <tr><td>10 B</td><td>3.568038</td><td>3.826039</td><td>2.977935</td><td>2.908276</td><td>0.000000</td></tr> <tr><td>11 Os</td><td>2.731328</td><td>2.153950</td><td>3.509182</td><td>3.511559</td><td>2.088061</td></tr> </tbody> </table> |          | 1        | 2        | 3        | 4 | 5 | 1 B  | 0.000000 |  |  |  |  | 2 B | 1.782607 | 0.000000 |  |  |  | 3 B  | 2.014403 | 2.702437 | 0.000000 |  |  | 4 B | 2.982045 | 3.058464 | 3.048022 | 0.000000 |  | 5 B | 2.745548 | 1.794890 | 2.788946 | 1.837526 | 0.000000 | 6 Os | 3.466554 | 3.489660 | 2.200177 | 2.073304 | 2.252331 | 7 B | 4.140394 | 3.122255 | 3.419548 | 2.871869 | 1.668946 | 8 B | 1.753868 | 1.859583 | 2.906839 | 1.720552 | 1.842719 | 9 B | 1.807155 | 2.848595 | 1.830567 | 1.784546 | 2.570972 | 10 B  | 1.694232 | 1.782182 | 1.800458 | 3.904610 | 2.948926 | 11 Os | 3.184240 | 2.296187 | 2.318486 | 3.704987 | 2.256745 |  | 6 | 7 | 8 | 9 | 10 | 6 Os | 0.000000 |  |  |  |  | 7 B | 2.171288 | 0.000000 |  |  |  | 8 B | 3.133757 | 3.477699 | 0.000000 |  |  | 9 B | 2.280602 | 3.715358 | 1.808502 | 0.000000 |  | 10 B  | 3.568038 | 3.826039 | 2.977935 | 2.908276 | 0.000000 | 11 Os | 2.731328 | 2.153950 | 3.509182 | 3.511559 | 2.088061 |
|                                                                                                                               | 1                                                                                                                                                                                                                                                                                                                                                                                                                                                                                                                                                                                                                                                                                                                                                                                                                                                                                                                                                                                                                                                                                                                                                                                                                                                                                                                                                                                                                                                                                                                                                                                                                                                                                                                                                                                                                                                                                                                                                         | 2        | 3        | 4        | 5        |   |   |      |          |  |  |  |  |     |          |          |  |  |  |      |          |          |          |  |  |     |          |          |          |          |  |     |          |          |          |          |          |      |          |          |          |          |          |     |          |          |          |          |          |     |          |          |          |          |          |     |          |          |          |          |          |       |          |          |          |          |          |       |          |          |          |          |          |  |   |   |   |   |    |      |          |  |  |  |  |     |          |          |  |  |  |     |          |          |          |  |  |     |          |          |          |          |  |       |          |          |          |          |          |       |          |          |          |          |          |
| 1 B                                                                                                                           | 0.000000                                                                                                                                                                                                                                                                                                                                                                                                                                                                                                                                                                                                                                                                                                                                                                                                                                                                                                                                                                                                                                                                                                                                                                                                                                                                                                                                                                                                                                                                                                                                                                                                                                                                                                                                                                                                                                                                                                                                                  |          |          |          |          |   |   |      |          |  |  |  |  |     |          |          |  |  |  |      |          |          |          |  |  |     |          |          |          |          |  |     |          |          |          |          |          |      |          |          |          |          |          |     |          |          |          |          |          |     |          |          |          |          |          |     |          |          |          |          |          |       |          |          |          |          |          |       |          |          |          |          |          |  |   |   |   |   |    |      |          |  |  |  |  |     |          |          |  |  |  |     |          |          |          |  |  |     |          |          |          |          |  |       |          |          |          |          |          |       |          |          |          |          |          |
| 2 B                                                                                                                           | 1.782607                                                                                                                                                                                                                                                                                                                                                                                                                                                                                                                                                                                                                                                                                                                                                                                                                                                                                                                                                                                                                                                                                                                                                                                                                                                                                                                                                                                                                                                                                                                                                                                                                                                                                                                                                                                                                                                                                                                                                  | 0.000000 |          |          |          |   |   |      |          |  |  |  |  |     |          |          |  |  |  |      |          |          |          |  |  |     |          |          |          |          |  |     |          |          |          |          |          |      |          |          |          |          |          |     |          |          |          |          |          |     |          |          |          |          |          |     |          |          |          |          |          |       |          |          |          |          |          |       |          |          |          |          |          |  |   |   |   |   |    |      |          |  |  |  |  |     |          |          |  |  |  |     |          |          |          |  |  |     |          |          |          |          |  |       |          |          |          |          |          |       |          |          |          |          |          |
| 3 B                                                                                                                           | 2.014403                                                                                                                                                                                                                                                                                                                                                                                                                                                                                                                                                                                                                                                                                                                                                                                                                                                                                                                                                                                                                                                                                                                                                                                                                                                                                                                                                                                                                                                                                                                                                                                                                                                                                                                                                                                                                                                                                                                                                  | 2.702437 | 0.000000 |          |          |   |   |      |          |  |  |  |  |     |          |          |  |  |  |      |          |          |          |  |  |     |          |          |          |          |  |     |          |          |          |          |          |      |          |          |          |          |          |     |          |          |          |          |          |     |          |          |          |          |          |     |          |          |          |          |          |       |          |          |          |          |          |       |          |          |          |          |          |  |   |   |   |   |    |      |          |  |  |  |  |     |          |          |  |  |  |     |          |          |          |  |  |     |          |          |          |          |  |       |          |          |          |          |          |       |          |          |          |          |          |
| 4 B                                                                                                                           | 2.982045                                                                                                                                                                                                                                                                                                                                                                                                                                                                                                                                                                                                                                                                                                                                                                                                                                                                                                                                                                                                                                                                                                                                                                                                                                                                                                                                                                                                                                                                                                                                                                                                                                                                                                                                                                                                                                                                                                                                                  | 3.058464 | 3.048022 | 0.000000 |          |   |   |      |          |  |  |  |  |     |          |          |  |  |  |      |          |          |          |  |  |     |          |          |          |          |  |     |          |          |          |          |          |      |          |          |          |          |          |     |          |          |          |          |          |     |          |          |          |          |          |     |          |          |          |          |          |       |          |          |          |          |          |       |          |          |          |          |          |  |   |   |   |   |    |      |          |  |  |  |  |     |          |          |  |  |  |     |          |          |          |  |  |     |          |          |          |          |  |       |          |          |          |          |          |       |          |          |          |          |          |
| 5 B                                                                                                                           | 2.745548                                                                                                                                                                                                                                                                                                                                                                                                                                                                                                                                                                                                                                                                                                                                                                                                                                                                                                                                                                                                                                                                                                                                                                                                                                                                                                                                                                                                                                                                                                                                                                                                                                                                                                                                                                                                                                                                                                                                                  | 1.794890 | 2.788946 | 1.837526 | 0.000000 |   |   |      |          |  |  |  |  |     |          |          |  |  |  |      |          |          |          |  |  |     |          |          |          |          |  |     |          |          |          |          |          |      |          |          |          |          |          |     |          |          |          |          |          |     |          |          |          |          |          |     |          |          |          |          |          |       |          |          |          |          |          |       |          |          |          |          |          |  |   |   |   |   |    |      |          |  |  |  |  |     |          |          |  |  |  |     |          |          |          |  |  |     |          |          |          |          |  |       |          |          |          |          |          |       |          |          |          |          |          |
| 6 Os                                                                                                                          | 3.466554                                                                                                                                                                                                                                                                                                                                                                                                                                                                                                                                                                                                                                                                                                                                                                                                                                                                                                                                                                                                                                                                                                                                                                                                                                                                                                                                                                                                                                                                                                                                                                                                                                                                                                                                                                                                                                                                                                                                                  | 3.489660 | 2.200177 | 2.073304 | 2.252331 |   |   |      |          |  |  |  |  |     |          |          |  |  |  |      |          |          |          |  |  |     |          |          |          |          |  |     |          |          |          |          |          |      |          |          |          |          |          |     |          |          |          |          |          |     |          |          |          |          |          |     |          |          |          |          |          |       |          |          |          |          |          |       |          |          |          |          |          |  |   |   |   |   |    |      |          |  |  |  |  |     |          |          |  |  |  |     |          |          |          |  |  |     |          |          |          |          |  |       |          |          |          |          |          |       |          |          |          |          |          |
| 7 B                                                                                                                           | 4.140394                                                                                                                                                                                                                                                                                                                                                                                                                                                                                                                                                                                                                                                                                                                                                                                                                                                                                                                                                                                                                                                                                                                                                                                                                                                                                                                                                                                                                                                                                                                                                                                                                                                                                                                                                                                                                                                                                                                                                  | 3.122255 | 3.419548 | 2.871869 | 1.668946 |   |   |      |          |  |  |  |  |     |          |          |  |  |  |      |          |          |          |  |  |     |          |          |          |          |  |     |          |          |          |          |          |      |          |          |          |          |          |     |          |          |          |          |          |     |          |          |          |          |          |     |          |          |          |          |          |       |          |          |          |          |          |       |          |          |          |          |          |  |   |   |   |   |    |      |          |  |  |  |  |     |          |          |  |  |  |     |          |          |          |  |  |     |          |          |          |          |  |       |          |          |          |          |          |       |          |          |          |          |          |
| 8 B                                                                                                                           | 1.753868                                                                                                                                                                                                                                                                                                                                                                                                                                                                                                                                                                                                                                                                                                                                                                                                                                                                                                                                                                                                                                                                                                                                                                                                                                                                                                                                                                                                                                                                                                                                                                                                                                                                                                                                                                                                                                                                                                                                                  | 1.859583 | 2.906839 | 1.720552 | 1.842719 |   |   |      |          |  |  |  |  |     |          |          |  |  |  |      |          |          |          |  |  |     |          |          |          |          |  |     |          |          |          |          |          |      |          |          |          |          |          |     |          |          |          |          |          |     |          |          |          |          |          |     |          |          |          |          |          |       |          |          |          |          |          |       |          |          |          |          |          |  |   |   |   |   |    |      |          |  |  |  |  |     |          |          |  |  |  |     |          |          |          |  |  |     |          |          |          |          |  |       |          |          |          |          |          |       |          |          |          |          |          |
| 9 B                                                                                                                           | 1.807155                                                                                                                                                                                                                                                                                                                                                                                                                                                                                                                                                                                                                                                                                                                                                                                                                                                                                                                                                                                                                                                                                                                                                                                                                                                                                                                                                                                                                                                                                                                                                                                                                                                                                                                                                                                                                                                                                                                                                  | 2.848595 | 1.830567 | 1.784546 | 2.570972 |   |   |      |          |  |  |  |  |     |          |          |  |  |  |      |          |          |          |  |  |     |          |          |          |          |  |     |          |          |          |          |          |      |          |          |          |          |          |     |          |          |          |          |          |     |          |          |          |          |          |     |          |          |          |          |          |       |          |          |          |          |          |       |          |          |          |          |          |  |   |   |   |   |    |      |          |  |  |  |  |     |          |          |  |  |  |     |          |          |          |  |  |     |          |          |          |          |  |       |          |          |          |          |          |       |          |          |          |          |          |
| 10 B                                                                                                                          | 1.694232                                                                                                                                                                                                                                                                                                                                                                                                                                                                                                                                                                                                                                                                                                                                                                                                                                                                                                                                                                                                                                                                                                                                                                                                                                                                                                                                                                                                                                                                                                                                                                                                                                                                                                                                                                                                                                                                                                                                                  | 1.782182 | 1.800458 | 3.904610 | 2.948926 |   |   |      |          |  |  |  |  |     |          |          |  |  |  |      |          |          |          |  |  |     |          |          |          |          |  |     |          |          |          |          |          |      |          |          |          |          |          |     |          |          |          |          |          |     |          |          |          |          |          |     |          |          |          |          |          |       |          |          |          |          |          |       |          |          |          |          |          |  |   |   |   |   |    |      |          |  |  |  |  |     |          |          |  |  |  |     |          |          |          |  |  |     |          |          |          |          |  |       |          |          |          |          |          |       |          |          |          |          |          |
| 11 Os                                                                                                                         | 3.184240                                                                                                                                                                                                                                                                                                                                                                                                                                                                                                                                                                                                                                                                                                                                                                                                                                                                                                                                                                                                                                                                                                                                                                                                                                                                                                                                                                                                                                                                                                                                                                                                                                                                                                                                                                                                                                                                                                                                                  | 2.296187 | 2.318486 | 3.704987 | 2.256745 |   |   |      |          |  |  |  |  |     |          |          |  |  |  |      |          |          |          |  |  |     |          |          |          |          |  |     |          |          |          |          |          |      |          |          |          |          |          |     |          |          |          |          |          |     |          |          |          |          |          |     |          |          |          |          |          |       |          |          |          |          |          |       |          |          |          |          |          |  |   |   |   |   |    |      |          |  |  |  |  |     |          |          |  |  |  |     |          |          |          |  |  |     |          |          |          |          |  |       |          |          |          |          |          |       |          |          |          |          |          |
|                                                                                                                               | 6                                                                                                                                                                                                                                                                                                                                                                                                                                                                                                                                                                                                                                                                                                                                                                                                                                                                                                                                                                                                                                                                                                                                                                                                                                                                                                                                                                                                                                                                                                                                                                                                                                                                                                                                                                                                                                                                                                                                                         | 7        | 8        | 9        | 10       |   |   |      |          |  |  |  |  |     |          |          |  |  |  |      |          |          |          |  |  |     |          |          |          |          |  |     |          |          |          |          |          |      |          |          |          |          |          |     |          |          |          |          |          |     |          |          |          |          |          |     |          |          |          |          |          |       |          |          |          |          |          |       |          |          |          |          |          |  |   |   |   |   |    |      |          |  |  |  |  |     |          |          |  |  |  |     |          |          |          |  |  |     |          |          |          |          |  |       |          |          |          |          |          |       |          |          |          |          |          |
| 6 Os                                                                                                                          | 0.000000                                                                                                                                                                                                                                                                                                                                                                                                                                                                                                                                                                                                                                                                                                                                                                                                                                                                                                                                                                                                                                                                                                                                                                                                                                                                                                                                                                                                                                                                                                                                                                                                                                                                                                                                                                                                                                                                                                                                                  |          |          |          |          |   |   |      |          |  |  |  |  |     |          |          |  |  |  |      |          |          |          |  |  |     |          |          |          |          |  |     |          |          |          |          |          |      |          |          |          |          |          |     |          |          |          |          |          |     |          |          |          |          |          |     |          |          |          |          |          |       |          |          |          |          |          |       |          |          |          |          |          |  |   |   |   |   |    |      |          |  |  |  |  |     |          |          |  |  |  |     |          |          |          |  |  |     |          |          |          |          |  |       |          |          |          |          |          |       |          |          |          |          |          |
| 7 B                                                                                                                           | 2.171288                                                                                                                                                                                                                                                                                                                                                                                                                                                                                                                                                                                                                                                                                                                                                                                                                                                                                                                                                                                                                                                                                                                                                                                                                                                                                                                                                                                                                                                                                                                                                                                                                                                                                                                                                                                                                                                                                                                                                  | 0.000000 |          |          |          |   |   |      |          |  |  |  |  |     |          |          |  |  |  |      |          |          |          |  |  |     |          |          |          |          |  |     |          |          |          |          |          |      |          |          |          |          |          |     |          |          |          |          |          |     |          |          |          |          |          |     |          |          |          |          |          |       |          |          |          |          |          |       |          |          |          |          |          |  |   |   |   |   |    |      |          |  |  |  |  |     |          |          |  |  |  |     |          |          |          |  |  |     |          |          |          |          |  |       |          |          |          |          |          |       |          |          |          |          |          |
| 8 B                                                                                                                           | 3.133757                                                                                                                                                                                                                                                                                                                                                                                                                                                                                                                                                                                                                                                                                                                                                                                                                                                                                                                                                                                                                                                                                                                                                                                                                                                                                                                                                                                                                                                                                                                                                                                                                                                                                                                                                                                                                                                                                                                                                  | 3.477699 | 0.000000 |          |          |   |   |      |          |  |  |  |  |     |          |          |  |  |  |      |          |          |          |  |  |     |          |          |          |          |  |     |          |          |          |          |          |      |          |          |          |          |          |     |          |          |          |          |          |     |          |          |          |          |          |     |          |          |          |          |          |       |          |          |          |          |          |       |          |          |          |          |          |  |   |   |   |   |    |      |          |  |  |  |  |     |          |          |  |  |  |     |          |          |          |  |  |     |          |          |          |          |  |       |          |          |          |          |          |       |          |          |          |          |          |
| 9 B                                                                                                                           | 2.280602                                                                                                                                                                                                                                                                                                                                                                                                                                                                                                                                                                                                                                                                                                                                                                                                                                                                                                                                                                                                                                                                                                                                                                                                                                                                                                                                                                                                                                                                                                                                                                                                                                                                                                                                                                                                                                                                                                                                                  | 3.715358 | 1.808502 | 0.000000 |          |   |   |      |          |  |  |  |  |     |          |          |  |  |  |      |          |          |          |  |  |     |          |          |          |          |  |     |          |          |          |          |          |      |          |          |          |          |          |     |          |          |          |          |          |     |          |          |          |          |          |     |          |          |          |          |          |       |          |          |          |          |          |       |          |          |          |          |          |  |   |   |   |   |    |      |          |  |  |  |  |     |          |          |  |  |  |     |          |          |          |  |  |     |          |          |          |          |  |       |          |          |          |          |          |       |          |          |          |          |          |
| 10 B                                                                                                                          | 3.568038                                                                                                                                                                                                                                                                                                                                                                                                                                                                                                                                                                                                                                                                                                                                                                                                                                                                                                                                                                                                                                                                                                                                                                                                                                                                                                                                                                                                                                                                                                                                                                                                                                                                                                                                                                                                                                                                                                                                                  | 3.826039 | 2.977935 | 2.908276 | 0.000000 |   |   |      |          |  |  |  |  |     |          |          |  |  |  |      |          |          |          |  |  |     |          |          |          |          |  |     |          |          |          |          |          |      |          |          |          |          |          |     |          |          |          |          |          |     |          |          |          |          |          |     |          |          |          |          |          |       |          |          |          |          |          |       |          |          |          |          |          |  |   |   |   |   |    |      |          |  |  |  |  |     |          |          |  |  |  |     |          |          |          |  |  |     |          |          |          |          |  |       |          |          |          |          |          |       |          |          |          |          |          |
| 11 Os                                                                                                                         | 2.731328                                                                                                                                                                                                                                                                                                                                                                                                                                                                                                                                                                                                                                                                                                                                                                                                                                                                                                                                                                                                                                                                                                                                                                                                                                                                                                                                                                                                                                                                                                                                                                                                                                                                                                                                                                                                                                                                                                                                                  | 2.153950 | 3.509182 | 3.511559 | 2.088061 |   |   |      |          |  |  |  |  |     |          |          |  |  |  |      |          |          |          |  |  |     |          |          |          |          |  |     |          |          |          |          |          |      |          |          |          |          |          |     |          |          |          |          |          |     |          |          |          |          |          |     |          |          |          |          |          |       |          |          |          |          |          |       |          |          |          |          |          |  |   |   |   |   |    |      |          |  |  |  |  |     |          |          |  |  |  |     |          |          |          |  |  |     |          |          |          |          |  |       |          |          |          |          |          |       |          |          |          |          |          |
|  <p>9. -797.76346454 +18.1</p>             | <table border="1"> <thead> <tr> <th></th> <th>1</th> <th>2</th> <th>3</th> <th>4</th> <th>5</th> </tr> </thead> <tbody> <tr><td>1 Os</td><td>0.000000</td><td></td><td></td><td></td><td></td></tr> <tr><td>2 B</td><td>2.285600</td><td>0.000000</td><td></td><td></td><td></td></tr> <tr><td>3 Os</td><td>2.850454</td><td>2.176298</td><td>0.000000</td><td></td><td></td></tr> <tr><td>4 B</td><td>2.234543</td><td>3.463916</td><td>2.278508</td><td>0.000000</td><td></td></tr> <tr><td>5 B</td><td>2.401626</td><td>2.758063</td><td>3.234408</td><td>3.173575</td><td>0.000000</td></tr> <tr><td>6 B</td><td>3.017760</td><td>1.820914</td><td>2.385148</td><td>3.604159</td><td>1.810356</td></tr> <tr><td>7 B</td><td>3.215253</td><td>3.154219</td><td>2.442439</td><td>2.753926</td><td>1.759636</td></tr> <tr><td>8 B</td><td>2.330012</td><td>3.565771</td><td>3.010098</td><td>1.799905</td><td>1.834306</td></tr> <tr><td>9 B</td><td>3.306739</td><td>3.801582</td><td>2.236788</td><td>1.687615</td><td>2.955118</td></tr> <tr><td>10 B</td><td>2.099597</td><td>2.792832</td><td>2.078351</td><td>1.785558</td><td>3.900847</td></tr> <tr><td>11 B</td><td>2.273819</td><td>1.690091</td><td>3.288929</td><td>3.864927</td><td>1.683142</td></tr> <tr> <td></td> <td>6</td> <td>7</td> <td>8</td> <td>9</td> <td>10</td> </tr> <tr><td>6 B</td><td>0.000000</td><td></td><td></td><td></td><td></td></tr> <tr><td>7 B</td><td>1.835063</td><td>0.000000</td><td></td><td></td><td></td></tr> <tr><td>8 B</td><td>2.991022</td><td>1.814108</td><td>0.000000</td><td></td><td></td></tr> <tr><td>9 B</td><td>3.146737</td><td>1.670478</td><td>1.752429</td><td>0.000000</td><td></td></tr> <tr><td>10 B</td><td>3.793767</td><td>3.774103</td><td>3.224701</td><td>3.100234</td><td>0.000000</td></tr> <tr><td>11 B</td><td>1.690380</td><td>2.933801</td><td>3.164993</td><td>4.039229</td><td>3.804272</td></tr> </tbody> </table>   |          | 1        | 2        | 3        | 4 | 5 | 1 Os | 0.000000 |  |  |  |  | 2 B | 2.285600 | 0.000000 |  |  |  | 3 Os | 2.850454 | 2.176298 | 0.000000 |  |  | 4 B | 2.234543 | 3.463916 | 2.278508 | 0.000000 |  | 5 B | 2.401626 | 2.758063 | 3.234408 | 3.173575 | 0.000000 | 6 B  | 3.017760 | 1.820914 | 2.385148 | 3.604159 | 1.810356 | 7 B | 3.215253 | 3.154219 | 2.442439 | 2.753926 | 1.759636 | 8 B | 2.330012 | 3.565771 | 3.010098 | 1.799905 | 1.834306 | 9 B | 3.306739 | 3.801582 | 2.236788 | 1.687615 | 2.955118 | 10 B  | 2.099597 | 2.792832 | 2.078351 | 1.785558 | 3.900847 | 11 B  | 2.273819 | 1.690091 | 3.288929 | 3.864927 | 1.683142 |  | 6 | 7 | 8 | 9 | 10 | 6 B  | 0.000000 |  |  |  |  | 7 B | 1.835063 | 0.000000 |  |  |  | 8 B | 2.991022 | 1.814108 | 0.000000 |  |  | 9 B | 3.146737 | 1.670478 | 1.752429 | 0.000000 |  | 10 B  | 3.793767 | 3.774103 | 3.224701 | 3.100234 | 0.000000 | 11 B  | 1.690380 | 2.933801 | 3.164993 | 4.039229 | 3.804272 |
|                                                                                                                               | 1                                                                                                                                                                                                                                                                                                                                                                                                                                                                                                                                                                                                                                                                                                                                                                                                                                                                                                                                                                                                                                                                                                                                                                                                                                                                                                                                                                                                                                                                                                                                                                                                                                                                                                                                                                                                                                                                                                                                                         | 2        | 3        | 4        | 5        |   |   |      |          |  |  |  |  |     |          |          |  |  |  |      |          |          |          |  |  |     |          |          |          |          |  |     |          |          |          |          |          |      |          |          |          |          |          |     |          |          |          |          |          |     |          |          |          |          |          |     |          |          |          |          |          |       |          |          |          |          |          |       |          |          |          |          |          |  |   |   |   |   |    |      |          |  |  |  |  |     |          |          |  |  |  |     |          |          |          |  |  |     |          |          |          |          |  |       |          |          |          |          |          |       |          |          |          |          |          |
| 1 Os                                                                                                                          | 0.000000                                                                                                                                                                                                                                                                                                                                                                                                                                                                                                                                                                                                                                                                                                                                                                                                                                                                                                                                                                                                                                                                                                                                                                                                                                                                                                                                                                                                                                                                                                                                                                                                                                                                                                                                                                                                                                                                                                                                                  |          |          |          |          |   |   |      |          |  |  |  |  |     |          |          |  |  |  |      |          |          |          |  |  |     |          |          |          |          |  |     |          |          |          |          |          |      |          |          |          |          |          |     |          |          |          |          |          |     |          |          |          |          |          |     |          |          |          |          |          |       |          |          |          |          |          |       |          |          |          |          |          |  |   |   |   |   |    |      |          |  |  |  |  |     |          |          |  |  |  |     |          |          |          |  |  |     |          |          |          |          |  |       |          |          |          |          |          |       |          |          |          |          |          |
| 2 B                                                                                                                           | 2.285600                                                                                                                                                                                                                                                                                                                                                                                                                                                                                                                                                                                                                                                                                                                                                                                                                                                                                                                                                                                                                                                                                                                                                                                                                                                                                                                                                                                                                                                                                                                                                                                                                                                                                                                                                                                                                                                                                                                                                  | 0.000000 |          |          |          |   |   |      |          |  |  |  |  |     |          |          |  |  |  |      |          |          |          |  |  |     |          |          |          |          |  |     |          |          |          |          |          |      |          |          |          |          |          |     |          |          |          |          |          |     |          |          |          |          |          |     |          |          |          |          |          |       |          |          |          |          |          |       |          |          |          |          |          |  |   |   |   |   |    |      |          |  |  |  |  |     |          |          |  |  |  |     |          |          |          |  |  |     |          |          |          |          |  |       |          |          |          |          |          |       |          |          |          |          |          |
| 3 Os                                                                                                                          | 2.850454                                                                                                                                                                                                                                                                                                                                                                                                                                                                                                                                                                                                                                                                                                                                                                                                                                                                                                                                                                                                                                                                                                                                                                                                                                                                                                                                                                                                                                                                                                                                                                                                                                                                                                                                                                                                                                                                                                                                                  | 2.176298 | 0.000000 |          |          |   |   |      |          |  |  |  |  |     |          |          |  |  |  |      |          |          |          |  |  |     |          |          |          |          |  |     |          |          |          |          |          |      |          |          |          |          |          |     |          |          |          |          |          |     |          |          |          |          |          |     |          |          |          |          |          |       |          |          |          |          |          |       |          |          |          |          |          |  |   |   |   |   |    |      |          |  |  |  |  |     |          |          |  |  |  |     |          |          |          |  |  |     |          |          |          |          |  |       |          |          |          |          |          |       |          |          |          |          |          |
| 4 B                                                                                                                           | 2.234543                                                                                                                                                                                                                                                                                                                                                                                                                                                                                                                                                                                                                                                                                                                                                                                                                                                                                                                                                                                                                                                                                                                                                                                                                                                                                                                                                                                                                                                                                                                                                                                                                                                                                                                                                                                                                                                                                                                                                  | 3.463916 | 2.278508 | 0.000000 |          |   |   |      |          |  |  |  |  |     |          |          |  |  |  |      |          |          |          |  |  |     |          |          |          |          |  |     |          |          |          |          |          |      |          |          |          |          |          |     |          |          |          |          |          |     |          |          |          |          |          |     |          |          |          |          |          |       |          |          |          |          |          |       |          |          |          |          |          |  |   |   |   |   |    |      |          |  |  |  |  |     |          |          |  |  |  |     |          |          |          |  |  |     |          |          |          |          |  |       |          |          |          |          |          |       |          |          |          |          |          |
| 5 B                                                                                                                           | 2.401626                                                                                                                                                                                                                                                                                                                                                                                                                                                                                                                                                                                                                                                                                                                                                                                                                                                                                                                                                                                                                                                                                                                                                                                                                                                                                                                                                                                                                                                                                                                                                                                                                                                                                                                                                                                                                                                                                                                                                  | 2.758063 | 3.234408 | 3.173575 | 0.000000 |   |   |      |          |  |  |  |  |     |          |          |  |  |  |      |          |          |          |  |  |     |          |          |          |          |  |     |          |          |          |          |          |      |          |          |          |          |          |     |          |          |          |          |          |     |          |          |          |          |          |     |          |          |          |          |          |       |          |          |          |          |          |       |          |          |          |          |          |  |   |   |   |   |    |      |          |  |  |  |  |     |          |          |  |  |  |     |          |          |          |  |  |     |          |          |          |          |  |       |          |          |          |          |          |       |          |          |          |          |          |
| 6 B                                                                                                                           | 3.017760                                                                                                                                                                                                                                                                                                                                                                                                                                                                                                                                                                                                                                                                                                                                                                                                                                                                                                                                                                                                                                                                                                                                                                                                                                                                                                                                                                                                                                                                                                                                                                                                                                                                                                                                                                                                                                                                                                                                                  | 1.820914 | 2.385148 | 3.604159 | 1.810356 |   |   |      |          |  |  |  |  |     |          |          |  |  |  |      |          |          |          |  |  |     |          |          |          |          |  |     |          |          |          |          |          |      |          |          |          |          |          |     |          |          |          |          |          |     |          |          |          |          |          |     |          |          |          |          |          |       |          |          |          |          |          |       |          |          |          |          |          |  |   |   |   |   |    |      |          |  |  |  |  |     |          |          |  |  |  |     |          |          |          |  |  |     |          |          |          |          |  |       |          |          |          |          |          |       |          |          |          |          |          |
| 7 B                                                                                                                           | 3.215253                                                                                                                                                                                                                                                                                                                                                                                                                                                                                                                                                                                                                                                                                                                                                                                                                                                                                                                                                                                                                                                                                                                                                                                                                                                                                                                                                                                                                                                                                                                                                                                                                                                                                                                                                                                                                                                                                                                                                  | 3.154219 | 2.442439 | 2.753926 | 1.759636 |   |   |      |          |  |  |  |  |     |          |          |  |  |  |      |          |          |          |  |  |     |          |          |          |          |  |     |          |          |          |          |          |      |          |          |          |          |          |     |          |          |          |          |          |     |          |          |          |          |          |     |          |          |          |          |          |       |          |          |          |          |          |       |          |          |          |          |          |  |   |   |   |   |    |      |          |  |  |  |  |     |          |          |  |  |  |     |          |          |          |  |  |     |          |          |          |          |  |       |          |          |          |          |          |       |          |          |          |          |          |
| 8 B                                                                                                                           | 2.330012                                                                                                                                                                                                                                                                                                                                                                                                                                                                                                                                                                                                                                                                                                                                                                                                                                                                                                                                                                                                                                                                                                                                                                                                                                                                                                                                                                                                                                                                                                                                                                                                                                                                                                                                                                                                                                                                                                                                                  | 3.565771 | 3.010098 | 1.799905 | 1.834306 |   |   |      |          |  |  |  |  |     |          |          |  |  |  |      |          |          |          |  |  |     |          |          |          |          |  |     |          |          |          |          |          |      |          |          |          |          |          |     |          |          |          |          |          |     |          |          |          |          |          |     |          |          |          |          |          |       |          |          |          |          |          |       |          |          |          |          |          |  |   |   |   |   |    |      |          |  |  |  |  |     |          |          |  |  |  |     |          |          |          |  |  |     |          |          |          |          |  |       |          |          |          |          |          |       |          |          |          |          |          |
| 9 B                                                                                                                           | 3.306739                                                                                                                                                                                                                                                                                                                                                                                                                                                                                                                                                                                                                                                                                                                                                                                                                                                                                                                                                                                                                                                                                                                                                                                                                                                                                                                                                                                                                                                                                                                                                                                                                                                                                                                                                                                                                                                                                                                                                  | 3.801582 | 2.236788 | 1.687615 | 2.955118 |   |   |      |          |  |  |  |  |     |          |          |  |  |  |      |          |          |          |  |  |     |          |          |          |          |  |     |          |          |          |          |          |      |          |          |          |          |          |     |          |          |          |          |          |     |          |          |          |          |          |     |          |          |          |          |          |       |          |          |          |          |          |       |          |          |          |          |          |  |   |   |   |   |    |      |          |  |  |  |  |     |          |          |  |  |  |     |          |          |          |  |  |     |          |          |          |          |  |       |          |          |          |          |          |       |          |          |          |          |          |
| 10 B                                                                                                                          | 2.099597                                                                                                                                                                                                                                                                                                                                                                                                                                                                                                                                                                                                                                                                                                                                                                                                                                                                                                                                                                                                                                                                                                                                                                                                                                                                                                                                                                                                                                                                                                                                                                                                                                                                                                                                                                                                                                                                                                                                                  | 2.792832 | 2.078351 | 1.785558 | 3.900847 |   |   |      |          |  |  |  |  |     |          |          |  |  |  |      |          |          |          |  |  |     |          |          |          |          |  |     |          |          |          |          |          |      |          |          |          |          |          |     |          |          |          |          |          |     |          |          |          |          |          |     |          |          |          |          |          |       |          |          |          |          |          |       |          |          |          |          |          |  |   |   |   |   |    |      |          |  |  |  |  |     |          |          |  |  |  |     |          |          |          |  |  |     |          |          |          |          |  |       |          |          |          |          |          |       |          |          |          |          |          |
| 11 B                                                                                                                          | 2.273819                                                                                                                                                                                                                                                                                                                                                                                                                                                                                                                                                                                                                                                                                                                                                                                                                                                                                                                                                                                                                                                                                                                                                                                                                                                                                                                                                                                                                                                                                                                                                                                                                                                                                                                                                                                                                                                                                                                                                  | 1.690091 | 3.288929 | 3.864927 | 1.683142 |   |   |      |          |  |  |  |  |     |          |          |  |  |  |      |          |          |          |  |  |     |          |          |          |          |  |     |          |          |          |          |          |      |          |          |          |          |          |     |          |          |          |          |          |     |          |          |          |          |          |     |          |          |          |          |          |       |          |          |          |          |          |       |          |          |          |          |          |  |   |   |   |   |    |      |          |  |  |  |  |     |          |          |  |  |  |     |          |          |          |  |  |     |          |          |          |          |  |       |          |          |          |          |          |       |          |          |          |          |          |
|                                                                                                                               | 6                                                                                                                                                                                                                                                                                                                                                                                                                                                                                                                                                                                                                                                                                                                                                                                                                                                                                                                                                                                                                                                                                                                                                                                                                                                                                                                                                                                                                                                                                                                                                                                                                                                                                                                                                                                                                                                                                                                                                         | 7        | 8        | 9        | 10       |   |   |      |          |  |  |  |  |     |          |          |  |  |  |      |          |          |          |  |  |     |          |          |          |          |  |     |          |          |          |          |          |      |          |          |          |          |          |     |          |          |          |          |          |     |          |          |          |          |          |     |          |          |          |          |          |       |          |          |          |          |          |       |          |          |          |          |          |  |   |   |   |   |    |      |          |  |  |  |  |     |          |          |  |  |  |     |          |          |          |  |  |     |          |          |          |          |  |       |          |          |          |          |          |       |          |          |          |          |          |
| 6 B                                                                                                                           | 0.000000                                                                                                                                                                                                                                                                                                                                                                                                                                                                                                                                                                                                                                                                                                                                                                                                                                                                                                                                                                                                                                                                                                                                                                                                                                                                                                                                                                                                                                                                                                                                                                                                                                                                                                                                                                                                                                                                                                                                                  |          |          |          |          |   |   |      |          |  |  |  |  |     |          |          |  |  |  |      |          |          |          |  |  |     |          |          |          |          |  |     |          |          |          |          |          |      |          |          |          |          |          |     |          |          |          |          |          |     |          |          |          |          |          |     |          |          |          |          |          |       |          |          |          |          |          |       |          |          |          |          |          |  |   |   |   |   |    |      |          |  |  |  |  |     |          |          |  |  |  |     |          |          |          |  |  |     |          |          |          |          |  |       |          |          |          |          |          |       |          |          |          |          |          |
| 7 B                                                                                                                           | 1.835063                                                                                                                                                                                                                                                                                                                                                                                                                                                                                                                                                                                                                                                                                                                                                                                                                                                                                                                                                                                                                                                                                                                                                                                                                                                                                                                                                                                                                                                                                                                                                                                                                                                                                                                                                                                                                                                                                                                                                  | 0.000000 |          |          |          |   |   |      |          |  |  |  |  |     |          |          |  |  |  |      |          |          |          |  |  |     |          |          |          |          |  |     |          |          |          |          |          |      |          |          |          |          |          |     |          |          |          |          |          |     |          |          |          |          |          |     |          |          |          |          |          |       |          |          |          |          |          |       |          |          |          |          |          |  |   |   |   |   |    |      |          |  |  |  |  |     |          |          |  |  |  |     |          |          |          |  |  |     |          |          |          |          |  |       |          |          |          |          |          |       |          |          |          |          |          |
| 8 B                                                                                                                           | 2.991022                                                                                                                                                                                                                                                                                                                                                                                                                                                                                                                                                                                                                                                                                                                                                                                                                                                                                                                                                                                                                                                                                                                                                                                                                                                                                                                                                                                                                                                                                                                                                                                                                                                                                                                                                                                                                                                                                                                                                  | 1.814108 | 0.000000 |          |          |   |   |      |          |  |  |  |  |     |          |          |  |  |  |      |          |          |          |  |  |     |          |          |          |          |  |     |          |          |          |          |          |      |          |          |          |          |          |     |          |          |          |          |          |     |          |          |          |          |          |     |          |          |          |          |          |       |          |          |          |          |          |       |          |          |          |          |          |  |   |   |   |   |    |      |          |  |  |  |  |     |          |          |  |  |  |     |          |          |          |  |  |     |          |          |          |          |  |       |          |          |          |          |          |       |          |          |          |          |          |
| 9 B                                                                                                                           | 3.146737                                                                                                                                                                                                                                                                                                                                                                                                                                                                                                                                                                                                                                                                                                                                                                                                                                                                                                                                                                                                                                                                                                                                                                                                                                                                                                                                                                                                                                                                                                                                                                                                                                                                                                                                                                                                                                                                                                                                                  | 1.670478 | 1.752429 | 0.000000 |          |   |   |      |          |  |  |  |  |     |          |          |  |  |  |      |          |          |          |  |  |     |          |          |          |          |  |     |          |          |          |          |          |      |          |          |          |          |          |     |          |          |          |          |          |     |          |          |          |          |          |     |          |          |          |          |          |       |          |          |          |          |          |       |          |          |          |          |          |  |   |   |   |   |    |      |          |  |  |  |  |     |          |          |  |  |  |     |          |          |          |  |  |     |          |          |          |          |  |       |          |          |          |          |          |       |          |          |          |          |          |
| 10 B                                                                                                                          | 3.793767                                                                                                                                                                                                                                                                                                                                                                                                                                                                                                                                                                                                                                                                                                                                                                                                                                                                                                                                                                                                                                                                                                                                                                                                                                                                                                                                                                                                                                                                                                                                                                                                                                                                                                                                                                                                                                                                                                                                                  | 3.774103 | 3.224701 | 3.100234 | 0.000000 |   |   |      |          |  |  |  |  |     |          |          |  |  |  |      |          |          |          |  |  |     |          |          |          |          |  |     |          |          |          |          |          |      |          |          |          |          |          |     |          |          |          |          |          |     |          |          |          |          |          |     |          |          |          |          |          |       |          |          |          |          |          |       |          |          |          |          |          |  |   |   |   |   |    |      |          |  |  |  |  |     |          |          |  |  |  |     |          |          |          |  |  |     |          |          |          |          |  |       |          |          |          |          |          |       |          |          |          |          |          |
| 11 B                                                                                                                          | 1.690380                                                                                                                                                                                                                                                                                                                                                                                                                                                                                                                                                                                                                                                                                                                                                                                                                                                                                                                                                                                                                                                                                                                                                                                                                                                                                                                                                                                                                                                                                                                                                                                                                                                                                                                                                                                                                                                                                                                                                  | 2.933801 | 3.164993 | 4.039229 | 3.804272 |   |   |      |          |  |  |  |  |     |          |          |  |  |  |      |          |          |          |  |  |     |          |          |          |          |  |     |          |          |          |          |          |      |          |          |          |          |          |     |          |          |          |          |          |     |          |          |          |          |          |     |          |          |          |          |          |       |          |          |          |          |          |       |          |          |          |          |          |  |   |   |   |   |    |      |          |  |  |  |  |     |          |          |  |  |  |     |          |          |          |  |  |     |          |          |          |          |  |       |          |          |          |          |          |       |          |          |          |          |          |

| 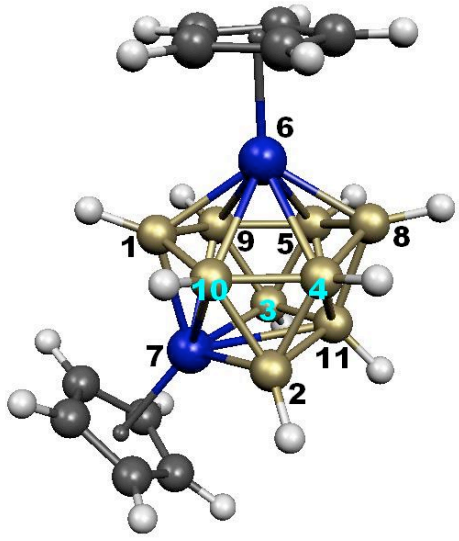 <p>10. -797.75788726 +21.6 <math>C_s</math></p>      | <table border="1"> <thead> <tr> <th></th> <th>1</th> <th>2</th> <th>3</th> <th>4</th> <th>5</th> </tr> </thead> <tbody> <tr><td>1 B</td><td>0.000000</td><td></td><td></td><td></td><td></td></tr> <tr><td>2 B</td><td>3.016498</td><td>0.000000</td><td></td><td></td><td></td></tr> <tr><td>3 B</td><td>3.016498</td><td>3.049000</td><td>0.000000</td><td></td><td></td></tr> <tr><td>4 B</td><td>3.050827</td><td>1.724949</td><td>3.443338</td><td>0.000000</td><td></td></tr> <tr><td>5 B</td><td>3.050827</td><td>3.443338</td><td>1.724949</td><td>2.912800</td><td>0.000000</td></tr> <tr><td>6 Os</td><td>2.163578</td><td>3.416902</td><td>3.416902</td><td>2.293180</td><td>2.293180</td></tr> <tr><td>7 Os</td><td>2.137622</td><td>2.065325</td><td>2.065325</td><td>3.166545</td><td>3.166545</td></tr> <tr><td>8 B</td><td>3.537133</td><td>2.993174</td><td>2.993174</td><td>1.750916</td><td>1.750916</td></tr> <tr><td>9 B</td><td>1.775724</td><td>3.492898</td><td>1.786208</td><td>3.402377</td><td>1.723034</td></tr> <tr><td>10 B</td><td>1.775724</td><td>1.786208</td><td>3.492898</td><td>1.723034</td><td>3.402377</td></tr> <tr><td>11 B</td><td>3.353242</td><td>1.875640</td><td>1.875640</td><td>1.988161</td><td>1.988161</td></tr> <tr> <td></td> <td>6</td> <td>7</td> <td>8</td> <td>9</td> <td>10</td> </tr> <tr><td>6 Os</td><td>0.000000</td><td></td><td></td><td></td><td></td></tr> <tr><td>7 Os</td><td>3.556566</td><td>0.000000</td><td></td><td></td><td></td></tr> <tr><td>8 B</td><td>2.074090</td><td>3.765282</td><td>0.000000</td><td></td><td></td></tr> <tr><td>9 B</td><td>2.281823</td><td>2.364903</td><td>3.014737</td><td>0.000000</td><td></td></tr> <tr><td>10 B</td><td>2.281823</td><td>2.364903</td><td>3.014737</td><td>2.955000</td><td>0.000000</td></tr> <tr><td>11 B</td><td>3.084433</td><td>2.486027</td><td>1.858527</td><td>2.816401</td><td>2.816401</td></tr> </tbody> </table> |          | 1        | 2        | 3        | 4 | 5 | 1 B  | 0.000000 |  |  |  |  | 2 B | 3.016498 | 0.000000 |  |  |  | 3 B | 3.016498 | 3.049000 | 0.000000 |  |  | 4 B  | 3.050827 | 1.724949 | 3.443338 | 0.000000 |  | 5 B | 3.050827 | 3.443338 | 1.724949 | 2.912800 | 0.000000 | 6 Os | 2.163578 | 3.416902 | 3.416902 | 2.293180 | 2.293180 | 7 Os | 2.137622 | 2.065325 | 2.065325 | 3.166545 | 3.166545 | 8 B  | 3.537133 | 2.993174 | 2.993174 | 1.750916 | 1.750916 | 9 B | 1.775724 | 3.492898 | 1.786208 | 3.402377 | 1.723034 | 10 B | 1.775724 | 1.786208 | 3.492898 | 1.723034 | 3.402377 | 11 B | 3.353242 | 1.875640 | 1.875640 | 1.988161 | 1.988161 |  | 6 | 7 | 8 | 9 | 10 | 6 Os | 0.000000 |  |  |  |  | 7 Os | 3.556566 | 0.000000 |  |  |  | 8 B  | 2.074090 | 3.765282 | 0.000000 |  |  | 9 B | 2.281823 | 2.364903 | 3.014737 | 0.000000 |  | 10 B | 2.281823 | 2.364903 | 3.014737 | 2.955000 | 0.000000 | 11 B | 3.084433 | 2.486027 | 1.858527 | 2.816401 | 2.816401 |
|----------------------------------------------------------------------------------------------------------------------------------------|-----------------------------------------------------------------------------------------------------------------------------------------------------------------------------------------------------------------------------------------------------------------------------------------------------------------------------------------------------------------------------------------------------------------------------------------------------------------------------------------------------------------------------------------------------------------------------------------------------------------------------------------------------------------------------------------------------------------------------------------------------------------------------------------------------------------------------------------------------------------------------------------------------------------------------------------------------------------------------------------------------------------------------------------------------------------------------------------------------------------------------------------------------------------------------------------------------------------------------------------------------------------------------------------------------------------------------------------------------------------------------------------------------------------------------------------------------------------------------------------------------------------------------------------------------------------------------------------------------------------------------------------------------------------------------------------------------------------------------------------------------------------------------------------------------------------------------------------------------------------------------------------------------------------------------------------------------------|----------|----------|----------|----------|---|---|------|----------|--|--|--|--|-----|----------|----------|--|--|--|-----|----------|----------|----------|--|--|------|----------|----------|----------|----------|--|-----|----------|----------|----------|----------|----------|------|----------|----------|----------|----------|----------|------|----------|----------|----------|----------|----------|------|----------|----------|----------|----------|----------|-----|----------|----------|----------|----------|----------|------|----------|----------|----------|----------|----------|------|----------|----------|----------|----------|----------|--|---|---|---|---|----|------|----------|--|--|--|--|------|----------|----------|--|--|--|------|----------|----------|----------|--|--|-----|----------|----------|----------|----------|--|------|----------|----------|----------|----------|----------|------|----------|----------|----------|----------|----------|
|                                                                                                                                        | 1                                                                                                                                                                                                                                                                                                                                                                                                                                                                                                                                                                                                                                                                                                                                                                                                                                                                                                                                                                                                                                                                                                                                                                                                                                                                                                                                                                                                                                                                                                                                                                                                                                                                                                                                                                                                                                                                                                                                                         | 2        | 3        | 4        | 5        |   |   |      |          |  |  |  |  |     |          |          |  |  |  |     |          |          |          |  |  |      |          |          |          |          |  |     |          |          |          |          |          |      |          |          |          |          |          |      |          |          |          |          |          |      |          |          |          |          |          |     |          |          |          |          |          |      |          |          |          |          |          |      |          |          |          |          |          |  |   |   |   |   |    |      |          |  |  |  |  |      |          |          |  |  |  |      |          |          |          |  |  |     |          |          |          |          |  |      |          |          |          |          |          |      |          |          |          |          |          |
| 1 B                                                                                                                                    | 0.000000                                                                                                                                                                                                                                                                                                                                                                                                                                                                                                                                                                                                                                                                                                                                                                                                                                                                                                                                                                                                                                                                                                                                                                                                                                                                                                                                                                                                                                                                                                                                                                                                                                                                                                                                                                                                                                                                                                                                                  |          |          |          |          |   |   |      |          |  |  |  |  |     |          |          |  |  |  |     |          |          |          |  |  |      |          |          |          |          |  |     |          |          |          |          |          |      |          |          |          |          |          |      |          |          |          |          |          |      |          |          |          |          |          |     |          |          |          |          |          |      |          |          |          |          |          |      |          |          |          |          |          |  |   |   |   |   |    |      |          |  |  |  |  |      |          |          |  |  |  |      |          |          |          |  |  |     |          |          |          |          |  |      |          |          |          |          |          |      |          |          |          |          |          |
| 2 B                                                                                                                                    | 3.016498                                                                                                                                                                                                                                                                                                                                                                                                                                                                                                                                                                                                                                                                                                                                                                                                                                                                                                                                                                                                                                                                                                                                                                                                                                                                                                                                                                                                                                                                                                                                                                                                                                                                                                                                                                                                                                                                                                                                                  | 0.000000 |          |          |          |   |   |      |          |  |  |  |  |     |          |          |  |  |  |     |          |          |          |  |  |      |          |          |          |          |  |     |          |          |          |          |          |      |          |          |          |          |          |      |          |          |          |          |          |      |          |          |          |          |          |     |          |          |          |          |          |      |          |          |          |          |          |      |          |          |          |          |          |  |   |   |   |   |    |      |          |  |  |  |  |      |          |          |  |  |  |      |          |          |          |  |  |     |          |          |          |          |  |      |          |          |          |          |          |      |          |          |          |          |          |
| 3 B                                                                                                                                    | 3.016498                                                                                                                                                                                                                                                                                                                                                                                                                                                                                                                                                                                                                                                                                                                                                                                                                                                                                                                                                                                                                                                                                                                                                                                                                                                                                                                                                                                                                                                                                                                                                                                                                                                                                                                                                                                                                                                                                                                                                  | 3.049000 | 0.000000 |          |          |   |   |      |          |  |  |  |  |     |          |          |  |  |  |     |          |          |          |  |  |      |          |          |          |          |  |     |          |          |          |          |          |      |          |          |          |          |          |      |          |          |          |          |          |      |          |          |          |          |          |     |          |          |          |          |          |      |          |          |          |          |          |      |          |          |          |          |          |  |   |   |   |   |    |      |          |  |  |  |  |      |          |          |  |  |  |      |          |          |          |  |  |     |          |          |          |          |  |      |          |          |          |          |          |      |          |          |          |          |          |
| 4 B                                                                                                                                    | 3.050827                                                                                                                                                                                                                                                                                                                                                                                                                                                                                                                                                                                                                                                                                                                                                                                                                                                                                                                                                                                                                                                                                                                                                                                                                                                                                                                                                                                                                                                                                                                                                                                                                                                                                                                                                                                                                                                                                                                                                  | 1.724949 | 3.443338 | 0.000000 |          |   |   |      |          |  |  |  |  |     |          |          |  |  |  |     |          |          |          |  |  |      |          |          |          |          |  |     |          |          |          |          |          |      |          |          |          |          |          |      |          |          |          |          |          |      |          |          |          |          |          |     |          |          |          |          |          |      |          |          |          |          |          |      |          |          |          |          |          |  |   |   |   |   |    |      |          |  |  |  |  |      |          |          |  |  |  |      |          |          |          |  |  |     |          |          |          |          |  |      |          |          |          |          |          |      |          |          |          |          |          |
| 5 B                                                                                                                                    | 3.050827                                                                                                                                                                                                                                                                                                                                                                                                                                                                                                                                                                                                                                                                                                                                                                                                                                                                                                                                                                                                                                                                                                                                                                                                                                                                                                                                                                                                                                                                                                                                                                                                                                                                                                                                                                                                                                                                                                                                                  | 3.443338 | 1.724949 | 2.912800 | 0.000000 |   |   |      |          |  |  |  |  |     |          |          |  |  |  |     |          |          |          |  |  |      |          |          |          |          |  |     |          |          |          |          |          |      |          |          |          |          |          |      |          |          |          |          |          |      |          |          |          |          |          |     |          |          |          |          |          |      |          |          |          |          |          |      |          |          |          |          |          |  |   |   |   |   |    |      |          |  |  |  |  |      |          |          |  |  |  |      |          |          |          |  |  |     |          |          |          |          |  |      |          |          |          |          |          |      |          |          |          |          |          |
| 6 Os                                                                                                                                   | 2.163578                                                                                                                                                                                                                                                                                                                                                                                                                                                                                                                                                                                                                                                                                                                                                                                                                                                                                                                                                                                                                                                                                                                                                                                                                                                                                                                                                                                                                                                                                                                                                                                                                                                                                                                                                                                                                                                                                                                                                  | 3.416902 | 3.416902 | 2.293180 | 2.293180 |   |   |      |          |  |  |  |  |     |          |          |  |  |  |     |          |          |          |  |  |      |          |          |          |          |  |     |          |          |          |          |          |      |          |          |          |          |          |      |          |          |          |          |          |      |          |          |          |          |          |     |          |          |          |          |          |      |          |          |          |          |          |      |          |          |          |          |          |  |   |   |   |   |    |      |          |  |  |  |  |      |          |          |  |  |  |      |          |          |          |  |  |     |          |          |          |          |  |      |          |          |          |          |          |      |          |          |          |          |          |
| 7 Os                                                                                                                                   | 2.137622                                                                                                                                                                                                                                                                                                                                                                                                                                                                                                                                                                                                                                                                                                                                                                                                                                                                                                                                                                                                                                                                                                                                                                                                                                                                                                                                                                                                                                                                                                                                                                                                                                                                                                                                                                                                                                                                                                                                                  | 2.065325 | 2.065325 | 3.166545 | 3.166545 |   |   |      |          |  |  |  |  |     |          |          |  |  |  |     |          |          |          |  |  |      |          |          |          |          |  |     |          |          |          |          |          |      |          |          |          |          |          |      |          |          |          |          |          |      |          |          |          |          |          |     |          |          |          |          |          |      |          |          |          |          |          |      |          |          |          |          |          |  |   |   |   |   |    |      |          |  |  |  |  |      |          |          |  |  |  |      |          |          |          |  |  |     |          |          |          |          |  |      |          |          |          |          |          |      |          |          |          |          |          |
| 8 B                                                                                                                                    | 3.537133                                                                                                                                                                                                                                                                                                                                                                                                                                                                                                                                                                                                                                                                                                                                                                                                                                                                                                                                                                                                                                                                                                                                                                                                                                                                                                                                                                                                                                                                                                                                                                                                                                                                                                                                                                                                                                                                                                                                                  | 2.993174 | 2.993174 | 1.750916 | 1.750916 |   |   |      |          |  |  |  |  |     |          |          |  |  |  |     |          |          |          |  |  |      |          |          |          |          |  |     |          |          |          |          |          |      |          |          |          |          |          |      |          |          |          |          |          |      |          |          |          |          |          |     |          |          |          |          |          |      |          |          |          |          |          |      |          |          |          |          |          |  |   |   |   |   |    |      |          |  |  |  |  |      |          |          |  |  |  |      |          |          |          |  |  |     |          |          |          |          |  |      |          |          |          |          |          |      |          |          |          |          |          |
| 9 B                                                                                                                                    | 1.775724                                                                                                                                                                                                                                                                                                                                                                                                                                                                                                                                                                                                                                                                                                                                                                                                                                                                                                                                                                                                                                                                                                                                                                                                                                                                                                                                                                                                                                                                                                                                                                                                                                                                                                                                                                                                                                                                                                                                                  | 3.492898 | 1.786208 | 3.402377 | 1.723034 |   |   |      |          |  |  |  |  |     |          |          |  |  |  |     |          |          |          |  |  |      |          |          |          |          |  |     |          |          |          |          |          |      |          |          |          |          |          |      |          |          |          |          |          |      |          |          |          |          |          |     |          |          |          |          |          |      |          |          |          |          |          |      |          |          |          |          |          |  |   |   |   |   |    |      |          |  |  |  |  |      |          |          |  |  |  |      |          |          |          |  |  |     |          |          |          |          |  |      |          |          |          |          |          |      |          |          |          |          |          |
| 10 B                                                                                                                                   | 1.775724                                                                                                                                                                                                                                                                                                                                                                                                                                                                                                                                                                                                                                                                                                                                                                                                                                                                                                                                                                                                                                                                                                                                                                                                                                                                                                                                                                                                                                                                                                                                                                                                                                                                                                                                                                                                                                                                                                                                                  | 1.786208 | 3.492898 | 1.723034 | 3.402377 |   |   |      |          |  |  |  |  |     |          |          |  |  |  |     |          |          |          |  |  |      |          |          |          |          |  |     |          |          |          |          |          |      |          |          |          |          |          |      |          |          |          |          |          |      |          |          |          |          |          |     |          |          |          |          |          |      |          |          |          |          |          |      |          |          |          |          |          |  |   |   |   |   |    |      |          |  |  |  |  |      |          |          |  |  |  |      |          |          |          |  |  |     |          |          |          |          |  |      |          |          |          |          |          |      |          |          |          |          |          |
| 11 B                                                                                                                                   | 3.353242                                                                                                                                                                                                                                                                                                                                                                                                                                                                                                                                                                                                                                                                                                                                                                                                                                                                                                                                                                                                                                                                                                                                                                                                                                                                                                                                                                                                                                                                                                                                                                                                                                                                                                                                                                                                                                                                                                                                                  | 1.875640 | 1.875640 | 1.988161 | 1.988161 |   |   |      |          |  |  |  |  |     |          |          |  |  |  |     |          |          |          |  |  |      |          |          |          |          |  |     |          |          |          |          |          |      |          |          |          |          |          |      |          |          |          |          |          |      |          |          |          |          |          |     |          |          |          |          |          |      |          |          |          |          |          |      |          |          |          |          |          |  |   |   |   |   |    |      |          |  |  |  |  |      |          |          |  |  |  |      |          |          |          |  |  |     |          |          |          |          |  |      |          |          |          |          |          |      |          |          |          |          |          |
|                                                                                                                                        | 6                                                                                                                                                                                                                                                                                                                                                                                                                                                                                                                                                                                                                                                                                                                                                                                                                                                                                                                                                                                                                                                                                                                                                                                                                                                                                                                                                                                                                                                                                                                                                                                                                                                                                                                                                                                                                                                                                                                                                         | 7        | 8        | 9        | 10       |   |   |      |          |  |  |  |  |     |          |          |  |  |  |     |          |          |          |  |  |      |          |          |          |          |  |     |          |          |          |          |          |      |          |          |          |          |          |      |          |          |          |          |          |      |          |          |          |          |          |     |          |          |          |          |          |      |          |          |          |          |          |      |          |          |          |          |          |  |   |   |   |   |    |      |          |  |  |  |  |      |          |          |  |  |  |      |          |          |          |  |  |     |          |          |          |          |  |      |          |          |          |          |          |      |          |          |          |          |          |
| 6 Os                                                                                                                                   | 0.000000                                                                                                                                                                                                                                                                                                                                                                                                                                                                                                                                                                                                                                                                                                                                                                                                                                                                                                                                                                                                                                                                                                                                                                                                                                                                                                                                                                                                                                                                                                                                                                                                                                                                                                                                                                                                                                                                                                                                                  |          |          |          |          |   |   |      |          |  |  |  |  |     |          |          |  |  |  |     |          |          |          |  |  |      |          |          |          |          |  |     |          |          |          |          |          |      |          |          |          |          |          |      |          |          |          |          |          |      |          |          |          |          |          |     |          |          |          |          |          |      |          |          |          |          |          |      |          |          |          |          |          |  |   |   |   |   |    |      |          |  |  |  |  |      |          |          |  |  |  |      |          |          |          |  |  |     |          |          |          |          |  |      |          |          |          |          |          |      |          |          |          |          |          |
| 7 Os                                                                                                                                   | 3.556566                                                                                                                                                                                                                                                                                                                                                                                                                                                                                                                                                                                                                                                                                                                                                                                                                                                                                                                                                                                                                                                                                                                                                                                                                                                                                                                                                                                                                                                                                                                                                                                                                                                                                                                                                                                                                                                                                                                                                  | 0.000000 |          |          |          |   |   |      |          |  |  |  |  |     |          |          |  |  |  |     |          |          |          |  |  |      |          |          |          |          |  |     |          |          |          |          |          |      |          |          |          |          |          |      |          |          |          |          |          |      |          |          |          |          |          |     |          |          |          |          |          |      |          |          |          |          |          |      |          |          |          |          |          |  |   |   |   |   |    |      |          |  |  |  |  |      |          |          |  |  |  |      |          |          |          |  |  |     |          |          |          |          |  |      |          |          |          |          |          |      |          |          |          |          |          |
| 8 B                                                                                                                                    | 2.074090                                                                                                                                                                                                                                                                                                                                                                                                                                                                                                                                                                                                                                                                                                                                                                                                                                                                                                                                                                                                                                                                                                                                                                                                                                                                                                                                                                                                                                                                                                                                                                                                                                                                                                                                                                                                                                                                                                                                                  | 3.765282 | 0.000000 |          |          |   |   |      |          |  |  |  |  |     |          |          |  |  |  |     |          |          |          |  |  |      |          |          |          |          |  |     |          |          |          |          |          |      |          |          |          |          |          |      |          |          |          |          |          |      |          |          |          |          |          |     |          |          |          |          |          |      |          |          |          |          |          |      |          |          |          |          |          |  |   |   |   |   |    |      |          |  |  |  |  |      |          |          |  |  |  |      |          |          |          |  |  |     |          |          |          |          |  |      |          |          |          |          |          |      |          |          |          |          |          |
| 9 B                                                                                                                                    | 2.281823                                                                                                                                                                                                                                                                                                                                                                                                                                                                                                                                                                                                                                                                                                                                                                                                                                                                                                                                                                                                                                                                                                                                                                                                                                                                                                                                                                                                                                                                                                                                                                                                                                                                                                                                                                                                                                                                                                                                                  | 2.364903 | 3.014737 | 0.000000 |          |   |   |      |          |  |  |  |  |     |          |          |  |  |  |     |          |          |          |  |  |      |          |          |          |          |  |     |          |          |          |          |          |      |          |          |          |          |          |      |          |          |          |          |          |      |          |          |          |          |          |     |          |          |          |          |          |      |          |          |          |          |          |      |          |          |          |          |          |  |   |   |   |   |    |      |          |  |  |  |  |      |          |          |  |  |  |      |          |          |          |  |  |     |          |          |          |          |  |      |          |          |          |          |          |      |          |          |          |          |          |
| 10 B                                                                                                                                   | 2.281823                                                                                                                                                                                                                                                                                                                                                                                                                                                                                                                                                                                                                                                                                                                                                                                                                                                                                                                                                                                                                                                                                                                                                                                                                                                                                                                                                                                                                                                                                                                                                                                                                                                                                                                                                                                                                                                                                                                                                  | 2.364903 | 3.014737 | 2.955000 | 0.000000 |   |   |      |          |  |  |  |  |     |          |          |  |  |  |     |          |          |          |  |  |      |          |          |          |          |  |     |          |          |          |          |          |      |          |          |          |          |          |      |          |          |          |          |          |      |          |          |          |          |          |     |          |          |          |          |          |      |          |          |          |          |          |      |          |          |          |          |          |  |   |   |   |   |    |      |          |  |  |  |  |      |          |          |  |  |  |      |          |          |          |  |  |     |          |          |          |          |  |      |          |          |          |          |          |      |          |          |          |          |          |
| 11 B                                                                                                                                   | 3.084433                                                                                                                                                                                                                                                                                                                                                                                                                                                                                                                                                                                                                                                                                                                                                                                                                                                                                                                                                                                                                                                                                                                                                                                                                                                                                                                                                                                                                                                                                                                                                                                                                                                                                                                                                                                                                                                                                                                                                  | 2.486027 | 1.858527 | 2.816401 | 2.816401 |   |   |      |          |  |  |  |  |     |          |          |  |  |  |     |          |          |          |  |  |      |          |          |          |          |  |     |          |          |          |          |          |      |          |          |          |          |          |      |          |          |          |          |          |      |          |          |          |          |          |     |          |          |          |          |          |      |          |          |          |          |          |      |          |          |          |          |          |  |   |   |   |   |    |      |          |  |  |  |  |      |          |          |  |  |  |      |          |          |          |  |  |     |          |          |          |          |  |      |          |          |          |          |          |      |          |          |          |          |          |
|  <p>11. -797.75647286 +22.5</p>                      | <table border="1"> <thead> <tr> <th></th> <th>1</th> <th>2</th> <th>3</th> <th>4</th> <th>5</th> </tr> </thead> <tbody> <tr><td>1 Os</td><td>0.000000</td><td></td><td></td><td></td><td></td></tr> <tr><td>2 B</td><td>2.328768</td><td>0.000000</td><td></td><td></td><td></td></tr> <tr><td>3 B</td><td>2.180142</td><td>1.921017</td><td>0.000000</td><td></td><td></td></tr> <tr><td>4 B</td><td>3.535678</td><td>1.739059</td><td>2.880404</td><td>0.000000</td><td></td></tr> <tr><td>5 B</td><td>3.495195</td><td>3.039144</td><td>1.722551</td><td>3.009532</td><td>0.000000</td></tr> <tr><td>6 B</td><td>2.237977</td><td>3.026208</td><td>2.839070</td><td>3.019427</td><td>2.970756</td></tr> <tr><td>7 B</td><td>2.010944</td><td>2.813590</td><td>1.729765</td><td>4.293586</td><td>3.301249</td></tr> <tr><td>8 Os</td><td>3.704349</td><td>3.094005</td><td>2.955594</td><td>2.118473</td><td>2.120019</td></tr> <tr><td>9 B</td><td>2.365864</td><td>3.115145</td><td>1.823168</td><td>3.452090</td><td>1.729140</td></tr> <tr><td>10 B</td><td>2.311155</td><td>1.788220</td><td>2.813467</td><td>1.728626</td><td>3.383074</td></tr> <tr><td>11 B</td><td>3.458876</td><td>1.838318</td><td>1.772703</td><td>1.735292</td><td>1.761824</td></tr> <tr> <td></td> <td>6</td> <td>7</td> <td>8</td> <td>9</td> <td>10</td> </tr> <tr><td>6 B</td><td>0.000000</td><td></td><td></td><td></td><td></td></tr> <tr><td>7 B</td><td>3.741690</td><td>0.000000</td><td></td><td></td><td></td></tr> <tr><td>8 Os</td><td>2.102504</td><td>4.536349</td><td>0.000000</td><td></td><td></td></tr> <tr><td>9 B</td><td>1.756793</td><td>2.813560</td><td>2.357117</td><td>0.000000</td><td></td></tr> <tr><td>10 B</td><td>1.815819</td><td>3.788111</td><td>2.368516</td><td>2.890050</td><td>0.000000</td></tr> <tr><td>11 B</td><td>3.359714</td><td>3.382500</td><td>2.350838</td><td>2.834195</td><td>2.749280</td></tr> </tbody> </table>  |          | 1        | 2        | 3        | 4 | 5 | 1 Os | 0.000000 |  |  |  |  | 2 B | 2.328768 | 0.000000 |  |  |  | 3 B | 2.180142 | 1.921017 | 0.000000 |  |  | 4 B  | 3.535678 | 1.739059 | 2.880404 | 0.000000 |  | 5 B | 3.495195 | 3.039144 | 1.722551 | 3.009532 | 0.000000 | 6 B  | 2.237977 | 3.026208 | 2.839070 | 3.019427 | 2.970756 | 7 B  | 2.010944 | 2.813590 | 1.729765 | 4.293586 | 3.301249 | 8 Os | 3.704349 | 3.094005 | 2.955594 | 2.118473 | 2.120019 | 9 B | 2.365864 | 3.115145 | 1.823168 | 3.452090 | 1.729140 | 10 B | 2.311155 | 1.788220 | 2.813467 | 1.728626 | 3.383074 | 11 B | 3.458876 | 1.838318 | 1.772703 | 1.735292 | 1.761824 |  | 6 | 7 | 8 | 9 | 10 | 6 B  | 0.000000 |  |  |  |  | 7 B  | 3.741690 | 0.000000 |  |  |  | 8 Os | 2.102504 | 4.536349 | 0.000000 |  |  | 9 B | 1.756793 | 2.813560 | 2.357117 | 0.000000 |  | 10 B | 1.815819 | 3.788111 | 2.368516 | 2.890050 | 0.000000 | 11 B | 3.359714 | 3.382500 | 2.350838 | 2.834195 | 2.749280 |
|                                                                                                                                        | 1                                                                                                                                                                                                                                                                                                                                                                                                                                                                                                                                                                                                                                                                                                                                                                                                                                                                                                                                                                                                                                                                                                                                                                                                                                                                                                                                                                                                                                                                                                                                                                                                                                                                                                                                                                                                                                                                                                                                                         | 2        | 3        | 4        | 5        |   |   |      |          |  |  |  |  |     |          |          |  |  |  |     |          |          |          |  |  |      |          |          |          |          |  |     |          |          |          |          |          |      |          |          |          |          |          |      |          |          |          |          |          |      |          |          |          |          |          |     |          |          |          |          |          |      |          |          |          |          |          |      |          |          |          |          |          |  |   |   |   |   |    |      |          |  |  |  |  |      |          |          |  |  |  |      |          |          |          |  |  |     |          |          |          |          |  |      |          |          |          |          |          |      |          |          |          |          |          |
| 1 Os                                                                                                                                   | 0.000000                                                                                                                                                                                                                                                                                                                                                                                                                                                                                                                                                                                                                                                                                                                                                                                                                                                                                                                                                                                                                                                                                                                                                                                                                                                                                                                                                                                                                                                                                                                                                                                                                                                                                                                                                                                                                                                                                                                                                  |          |          |          |          |   |   |      |          |  |  |  |  |     |          |          |  |  |  |     |          |          |          |  |  |      |          |          |          |          |  |     |          |          |          |          |          |      |          |          |          |          |          |      |          |          |          |          |          |      |          |          |          |          |          |     |          |          |          |          |          |      |          |          |          |          |          |      |          |          |          |          |          |  |   |   |   |   |    |      |          |  |  |  |  |      |          |          |  |  |  |      |          |          |          |  |  |     |          |          |          |          |  |      |          |          |          |          |          |      |          |          |          |          |          |
| 2 B                                                                                                                                    | 2.328768                                                                                                                                                                                                                                                                                                                                                                                                                                                                                                                                                                                                                                                                                                                                                                                                                                                                                                                                                                                                                                                                                                                                                                                                                                                                                                                                                                                                                                                                                                                                                                                                                                                                                                                                                                                                                                                                                                                                                  | 0.000000 |          |          |          |   |   |      |          |  |  |  |  |     |          |          |  |  |  |     |          |          |          |  |  |      |          |          |          |          |  |     |          |          |          |          |          |      |          |          |          |          |          |      |          |          |          |          |          |      |          |          |          |          |          |     |          |          |          |          |          |      |          |          |          |          |          |      |          |          |          |          |          |  |   |   |   |   |    |      |          |  |  |  |  |      |          |          |  |  |  |      |          |          |          |  |  |     |          |          |          |          |  |      |          |          |          |          |          |      |          |          |          |          |          |
| 3 B                                                                                                                                    | 2.180142                                                                                                                                                                                                                                                                                                                                                                                                                                                                                                                                                                                                                                                                                                                                                                                                                                                                                                                                                                                                                                                                                                                                                                                                                                                                                                                                                                                                                                                                                                                                                                                                                                                                                                                                                                                                                                                                                                                                                  | 1.921017 | 0.000000 |          |          |   |   |      |          |  |  |  |  |     |          |          |  |  |  |     |          |          |          |  |  |      |          |          |          |          |  |     |          |          |          |          |          |      |          |          |          |          |          |      |          |          |          |          |          |      |          |          |          |          |          |     |          |          |          |          |          |      |          |          |          |          |          |      |          |          |          |          |          |  |   |   |   |   |    |      |          |  |  |  |  |      |          |          |  |  |  |      |          |          |          |  |  |     |          |          |          |          |  |      |          |          |          |          |          |      |          |          |          |          |          |
| 4 B                                                                                                                                    | 3.535678                                                                                                                                                                                                                                                                                                                                                                                                                                                                                                                                                                                                                                                                                                                                                                                                                                                                                                                                                                                                                                                                                                                                                                                                                                                                                                                                                                                                                                                                                                                                                                                                                                                                                                                                                                                                                                                                                                                                                  | 1.739059 | 2.880404 | 0.000000 |          |   |   |      |          |  |  |  |  |     |          |          |  |  |  |     |          |          |          |  |  |      |          |          |          |          |  |     |          |          |          |          |          |      |          |          |          |          |          |      |          |          |          |          |          |      |          |          |          |          |          |     |          |          |          |          |          |      |          |          |          |          |          |      |          |          |          |          |          |  |   |   |   |   |    |      |          |  |  |  |  |      |          |          |  |  |  |      |          |          |          |  |  |     |          |          |          |          |  |      |          |          |          |          |          |      |          |          |          |          |          |
| 5 B                                                                                                                                    | 3.495195                                                                                                                                                                                                                                                                                                                                                                                                                                                                                                                                                                                                                                                                                                                                                                                                                                                                                                                                                                                                                                                                                                                                                                                                                                                                                                                                                                                                                                                                                                                                                                                                                                                                                                                                                                                                                                                                                                                                                  | 3.039144 | 1.722551 | 3.009532 | 0.000000 |   |   |      |          |  |  |  |  |     |          |          |  |  |  |     |          |          |          |  |  |      |          |          |          |          |  |     |          |          |          |          |          |      |          |          |          |          |          |      |          |          |          |          |          |      |          |          |          |          |          |     |          |          |          |          |          |      |          |          |          |          |          |      |          |          |          |          |          |  |   |   |   |   |    |      |          |  |  |  |  |      |          |          |  |  |  |      |          |          |          |  |  |     |          |          |          |          |  |      |          |          |          |          |          |      |          |          |          |          |          |
| 6 B                                                                                                                                    | 2.237977                                                                                                                                                                                                                                                                                                                                                                                                                                                                                                                                                                                                                                                                                                                                                                                                                                                                                                                                                                                                                                                                                                                                                                                                                                                                                                                                                                                                                                                                                                                                                                                                                                                                                                                                                                                                                                                                                                                                                  | 3.026208 | 2.839070 | 3.019427 | 2.970756 |   |   |      |          |  |  |  |  |     |          |          |  |  |  |     |          |          |          |  |  |      |          |          |          |          |  |     |          |          |          |          |          |      |          |          |          |          |          |      |          |          |          |          |          |      |          |          |          |          |          |     |          |          |          |          |          |      |          |          |          |          |          |      |          |          |          |          |          |  |   |   |   |   |    |      |          |  |  |  |  |      |          |          |  |  |  |      |          |          |          |  |  |     |          |          |          |          |  |      |          |          |          |          |          |      |          |          |          |          |          |
| 7 B                                                                                                                                    | 2.010944                                                                                                                                                                                                                                                                                                                                                                                                                                                                                                                                                                                                                                                                                                                                                                                                                                                                                                                                                                                                                                                                                                                                                                                                                                                                                                                                                                                                                                                                                                                                                                                                                                                                                                                                                                                                                                                                                                                                                  | 2.813590 | 1.729765 | 4.293586 | 3.301249 |   |   |      |          |  |  |  |  |     |          |          |  |  |  |     |          |          |          |  |  |      |          |          |          |          |  |     |          |          |          |          |          |      |          |          |          |          |          |      |          |          |          |          |          |      |          |          |          |          |          |     |          |          |          |          |          |      |          |          |          |          |          |      |          |          |          |          |          |  |   |   |   |   |    |      |          |  |  |  |  |      |          |          |  |  |  |      |          |          |          |  |  |     |          |          |          |          |  |      |          |          |          |          |          |      |          |          |          |          |          |
| 8 Os                                                                                                                                   | 3.704349                                                                                                                                                                                                                                                                                                                                                                                                                                                                                                                                                                                                                                                                                                                                                                                                                                                                                                                                                                                                                                                                                                                                                                                                                                                                                                                                                                                                                                                                                                                                                                                                                                                                                                                                                                                                                                                                                                                                                  | 3.094005 | 2.955594 | 2.118473 | 2.120019 |   |   |      |          |  |  |  |  |     |          |          |  |  |  |     |          |          |          |  |  |      |          |          |          |          |  |     |          |          |          |          |          |      |          |          |          |          |          |      |          |          |          |          |          |      |          |          |          |          |          |     |          |          |          |          |          |      |          |          |          |          |          |      |          |          |          |          |          |  |   |   |   |   |    |      |          |  |  |  |  |      |          |          |  |  |  |      |          |          |          |  |  |     |          |          |          |          |  |      |          |          |          |          |          |      |          |          |          |          |          |
| 9 B                                                                                                                                    | 2.365864                                                                                                                                                                                                                                                                                                                                                                                                                                                                                                                                                                                                                                                                                                                                                                                                                                                                                                                                                                                                                                                                                                                                                                                                                                                                                                                                                                                                                                                                                                                                                                                                                                                                                                                                                                                                                                                                                                                                                  | 3.115145 | 1.823168 | 3.452090 | 1.729140 |   |   |      |          |  |  |  |  |     |          |          |  |  |  |     |          |          |          |  |  |      |          |          |          |          |  |     |          |          |          |          |          |      |          |          |          |          |          |      |          |          |          |          |          |      |          |          |          |          |          |     |          |          |          |          |          |      |          |          |          |          |          |      |          |          |          |          |          |  |   |   |   |   |    |      |          |  |  |  |  |      |          |          |  |  |  |      |          |          |          |  |  |     |          |          |          |          |  |      |          |          |          |          |          |      |          |          |          |          |          |
| 10 B                                                                                                                                   | 2.311155                                                                                                                                                                                                                                                                                                                                                                                                                                                                                                                                                                                                                                                                                                                                                                                                                                                                                                                                                                                                                                                                                                                                                                                                                                                                                                                                                                                                                                                                                                                                                                                                                                                                                                                                                                                                                                                                                                                                                  | 1.788220 | 2.813467 | 1.728626 | 3.383074 |   |   |      |          |  |  |  |  |     |          |          |  |  |  |     |          |          |          |  |  |      |          |          |          |          |  |     |          |          |          |          |          |      |          |          |          |          |          |      |          |          |          |          |          |      |          |          |          |          |          |     |          |          |          |          |          |      |          |          |          |          |          |      |          |          |          |          |          |  |   |   |   |   |    |      |          |  |  |  |  |      |          |          |  |  |  |      |          |          |          |  |  |     |          |          |          |          |  |      |          |          |          |          |          |      |          |          |          |          |          |
| 11 B                                                                                                                                   | 3.458876                                                                                                                                                                                                                                                                                                                                                                                                                                                                                                                                                                                                                                                                                                                                                                                                                                                                                                                                                                                                                                                                                                                                                                                                                                                                                                                                                                                                                                                                                                                                                                                                                                                                                                                                                                                                                                                                                                                                                  | 1.838318 | 1.772703 | 1.735292 | 1.761824 |   |   |      |          |  |  |  |  |     |          |          |  |  |  |     |          |          |          |  |  |      |          |          |          |          |  |     |          |          |          |          |          |      |          |          |          |          |          |      |          |          |          |          |          |      |          |          |          |          |          |     |          |          |          |          |          |      |          |          |          |          |          |      |          |          |          |          |          |  |   |   |   |   |    |      |          |  |  |  |  |      |          |          |  |  |  |      |          |          |          |  |  |     |          |          |          |          |  |      |          |          |          |          |          |      |          |          |          |          |          |
|                                                                                                                                        | 6                                                                                                                                                                                                                                                                                                                                                                                                                                                                                                                                                                                                                                                                                                                                                                                                                                                                                                                                                                                                                                                                                                                                                                                                                                                                                                                                                                                                                                                                                                                                                                                                                                                                                                                                                                                                                                                                                                                                                         | 7        | 8        | 9        | 10       |   |   |      |          |  |  |  |  |     |          |          |  |  |  |     |          |          |          |  |  |      |          |          |          |          |  |     |          |          |          |          |          |      |          |          |          |          |          |      |          |          |          |          |          |      |          |          |          |          |          |     |          |          |          |          |          |      |          |          |          |          |          |      |          |          |          |          |          |  |   |   |   |   |    |      |          |  |  |  |  |      |          |          |  |  |  |      |          |          |          |  |  |     |          |          |          |          |  |      |          |          |          |          |          |      |          |          |          |          |          |
| 6 B                                                                                                                                    | 0.000000                                                                                                                                                                                                                                                                                                                                                                                                                                                                                                                                                                                                                                                                                                                                                                                                                                                                                                                                                                                                                                                                                                                                                                                                                                                                                                                                                                                                                                                                                                                                                                                                                                                                                                                                                                                                                                                                                                                                                  |          |          |          |          |   |   |      |          |  |  |  |  |     |          |          |  |  |  |     |          |          |          |  |  |      |          |          |          |          |  |     |          |          |          |          |          |      |          |          |          |          |          |      |          |          |          |          |          |      |          |          |          |          |          |     |          |          |          |          |          |      |          |          |          |          |          |      |          |          |          |          |          |  |   |   |   |   |    |      |          |  |  |  |  |      |          |          |  |  |  |      |          |          |          |  |  |     |          |          |          |          |  |      |          |          |          |          |          |      |          |          |          |          |          |
| 7 B                                                                                                                                    | 3.741690                                                                                                                                                                                                                                                                                                                                                                                                                                                                                                                                                                                                                                                                                                                                                                                                                                                                                                                                                                                                                                                                                                                                                                                                                                                                                                                                                                                                                                                                                                                                                                                                                                                                                                                                                                                                                                                                                                                                                  | 0.000000 |          |          |          |   |   |      |          |  |  |  |  |     |          |          |  |  |  |     |          |          |          |  |  |      |          |          |          |          |  |     |          |          |          |          |          |      |          |          |          |          |          |      |          |          |          |          |          |      |          |          |          |          |          |     |          |          |          |          |          |      |          |          |          |          |          |      |          |          |          |          |          |  |   |   |   |   |    |      |          |  |  |  |  |      |          |          |  |  |  |      |          |          |          |  |  |     |          |          |          |          |  |      |          |          |          |          |          |      |          |          |          |          |          |
| 8 Os                                                                                                                                   | 2.102504                                                                                                                                                                                                                                                                                                                                                                                                                                                                                                                                                                                                                                                                                                                                                                                                                                                                                                                                                                                                                                                                                                                                                                                                                                                                                                                                                                                                                                                                                                                                                                                                                                                                                                                                                                                                                                                                                                                                                  | 4.536349 | 0.000000 |          |          |   |   |      |          |  |  |  |  |     |          |          |  |  |  |     |          |          |          |  |  |      |          |          |          |          |  |     |          |          |          |          |          |      |          |          |          |          |          |      |          |          |          |          |          |      |          |          |          |          |          |     |          |          |          |          |          |      |          |          |          |          |          |      |          |          |          |          |          |  |   |   |   |   |    |      |          |  |  |  |  |      |          |          |  |  |  |      |          |          |          |  |  |     |          |          |          |          |  |      |          |          |          |          |          |      |          |          |          |          |          |
| 9 B                                                                                                                                    | 1.756793                                                                                                                                                                                                                                                                                                                                                                                                                                                                                                                                                                                                                                                                                                                                                                                                                                                                                                                                                                                                                                                                                                                                                                                                                                                                                                                                                                                                                                                                                                                                                                                                                                                                                                                                                                                                                                                                                                                                                  | 2.813560 | 2.357117 | 0.000000 |          |   |   |      |          |  |  |  |  |     |          |          |  |  |  |     |          |          |          |  |  |      |          |          |          |          |  |     |          |          |          |          |          |      |          |          |          |          |          |      |          |          |          |          |          |      |          |          |          |          |          |     |          |          |          |          |          |      |          |          |          |          |          |      |          |          |          |          |          |  |   |   |   |   |    |      |          |  |  |  |  |      |          |          |  |  |  |      |          |          |          |  |  |     |          |          |          |          |  |      |          |          |          |          |          |      |          |          |          |          |          |
| 10 B                                                                                                                                   | 1.815819                                                                                                                                                                                                                                                                                                                                                                                                                                                                                                                                                                                                                                                                                                                                                                                                                                                                                                                                                                                                                                                                                                                                                                                                                                                                                                                                                                                                                                                                                                                                                                                                                                                                                                                                                                                                                                                                                                                                                  | 3.788111 | 2.368516 | 2.890050 | 0.000000 |   |   |      |          |  |  |  |  |     |          |          |  |  |  |     |          |          |          |  |  |      |          |          |          |          |  |     |          |          |          |          |          |      |          |          |          |          |          |      |          |          |          |          |          |      |          |          |          |          |          |     |          |          |          |          |          |      |          |          |          |          |          |      |          |          |          |          |          |  |   |   |   |   |    |      |          |  |  |  |  |      |          |          |  |  |  |      |          |          |          |  |  |     |          |          |          |          |  |      |          |          |          |          |          |      |          |          |          |          |          |
| 11 B                                                                                                                                   | 3.359714                                                                                                                                                                                                                                                                                                                                                                                                                                                                                                                                                                                                                                                                                                                                                                                                                                                                                                                                                                                                                                                                                                                                                                                                                                                                                                                                                                                                                                                                                                                                                                                                                                                                                                                                                                                                                                                                                                                                                  | 3.382500 | 2.350838 | 2.834195 | 2.749280 |   |   |      |          |  |  |  |  |     |          |          |  |  |  |     |          |          |          |  |  |      |          |          |          |          |  |     |          |          |          |          |          |      |          |          |          |          |          |      |          |          |          |          |          |      |          |          |          |          |          |     |          |          |          |          |          |      |          |          |          |          |          |      |          |          |          |          |          |  |   |   |   |   |    |      |          |  |  |  |  |      |          |          |  |  |  |      |          |          |          |  |  |     |          |          |          |          |  |      |          |          |          |          |          |      |          |          |          |          |          |
|  <p>12. -797.75015319 +26.4 <math>C_{2v}</math></p> | <table border="1"> <thead> <tr> <th></th> <th>1</th> <th>2</th> <th>3</th> <th>4</th> <th>5</th> </tr> </thead> <tbody> <tr><td>1 Os</td><td>0.000000</td><td></td><td></td><td></td><td></td></tr> <tr><td>2 B</td><td>2.067424</td><td>0.000000</td><td></td><td></td><td></td></tr> <tr><td>3 B</td><td>3.895589</td><td>3.726200</td><td>0.000000</td><td></td><td></td></tr> <tr><td>4 Os</td><td>2.925600</td><td>3.895589</td><td>2.067424</td><td>0.000000</td><td></td></tr> <tr><td>5 B</td><td>2.149069</td><td>3.057030</td><td>3.057030</td><td>2.149069</td><td>0.000000</td></tr> <tr><td>6 B</td><td>2.325863</td><td>1.745983</td><td>3.039354</td><td>3.204538</td><td>3.446641</td></tr> <tr><td>7 B</td><td>2.149069</td><td>3.057030</td><td>3.057030</td><td>2.149069</td><td>3.128800</td></tr> <tr><td>8 B</td><td>2.325863</td><td>1.745983</td><td>3.039354</td><td>3.204538</td><td>1.797243</td></tr> <tr><td>9 B</td><td>3.204538</td><td>3.039354</td><td>1.745983</td><td>2.325863</td><td>3.446641</td></tr> <tr><td>10 B</td><td>3.204538</td><td>3.039354</td><td>1.745983</td><td>2.325863</td><td>1.797243</td></tr> <tr><td>11 B</td><td>3.126686</td><td>2.002876</td><td>2.002876</td><td>3.126686</td><td>3.022630</td></tr> <tr> <td></td> <td>6</td> <td>7</td> <td>8</td> <td>9</td> <td>10</td> </tr> <tr><td>6 B</td><td>0.000000</td><td></td><td></td><td></td><td></td></tr> <tr><td>7 B</td><td>1.797243</td><td>0.000000</td><td></td><td></td><td></td></tr> <tr><td>8 B</td><td>2.764400</td><td>3.446641</td><td>0.000000</td><td></td><td></td></tr> <tr><td>9 B</td><td>1.661000</td><td>1.797243</td><td>3.225032</td><td>0.000000</td><td></td></tr> <tr><td>10 B</td><td>3.225032</td><td>3.446641</td><td>1.661000</td><td>2.764400</td><td>0.000000</td></tr> <tr><td>11 B</td><td>1.898951</td><td>3.022630</td><td>1.898951</td><td>1.898951</td><td>1.898951</td></tr> </tbody> </table>   |          | 1        | 2        | 3        | 4 | 5 | 1 Os | 0.000000 |  |  |  |  | 2 B | 2.067424 | 0.000000 |  |  |  | 3 B | 3.895589 | 3.726200 | 0.000000 |  |  | 4 Os | 2.925600 | 3.895589 | 2.067424 | 0.000000 |  | 5 B | 2.149069 | 3.057030 | 3.057030 | 2.149069 | 0.000000 | 6 B  | 2.325863 | 1.745983 | 3.039354 | 3.204538 | 3.446641 | 7 B  | 2.149069 | 3.057030 | 3.057030 | 2.149069 | 3.128800 | 8 B  | 2.325863 | 1.745983 | 3.039354 | 3.204538 | 1.797243 | 9 B | 3.204538 | 3.039354 | 1.745983 | 2.325863 | 3.446641 | 10 B | 3.204538 | 3.039354 | 1.745983 | 2.325863 | 1.797243 | 11 B | 3.126686 | 2.002876 | 2.002876 | 3.126686 | 3.022630 |  | 6 | 7 | 8 | 9 | 10 | 6 B  | 0.000000 |  |  |  |  | 7 B  | 1.797243 | 0.000000 |  |  |  | 8 B  | 2.764400 | 3.446641 | 0.000000 |  |  | 9 B | 1.661000 | 1.797243 | 3.225032 | 0.000000 |  | 10 B | 3.225032 | 3.446641 | 1.661000 | 2.764400 | 0.000000 | 11 B | 1.898951 | 3.022630 | 1.898951 | 1.898951 | 1.898951 |
|                                                                                                                                        | 1                                                                                                                                                                                                                                                                                                                                                                                                                                                                                                                                                                                                                                                                                                                                                                                                                                                                                                                                                                                                                                                                                                                                                                                                                                                                                                                                                                                                                                                                                                                                                                                                                                                                                                                                                                                                                                                                                                                                                         | 2        | 3        | 4        | 5        |   |   |      |          |  |  |  |  |     |          |          |  |  |  |     |          |          |          |  |  |      |          |          |          |          |  |     |          |          |          |          |          |      |          |          |          |          |          |      |          |          |          |          |          |      |          |          |          |          |          |     |          |          |          |          |          |      |          |          |          |          |          |      |          |          |          |          |          |  |   |   |   |   |    |      |          |  |  |  |  |      |          |          |  |  |  |      |          |          |          |  |  |     |          |          |          |          |  |      |          |          |          |          |          |      |          |          |          |          |          |
| 1 Os                                                                                                                                   | 0.000000                                                                                                                                                                                                                                                                                                                                                                                                                                                                                                                                                                                                                                                                                                                                                                                                                                                                                                                                                                                                                                                                                                                                                                                                                                                                                                                                                                                                                                                                                                                                                                                                                                                                                                                                                                                                                                                                                                                                                  |          |          |          |          |   |   |      |          |  |  |  |  |     |          |          |  |  |  |     |          |          |          |  |  |      |          |          |          |          |  |     |          |          |          |          |          |      |          |          |          |          |          |      |          |          |          |          |          |      |          |          |          |          |          |     |          |          |          |          |          |      |          |          |          |          |          |      |          |          |          |          |          |  |   |   |   |   |    |      |          |  |  |  |  |      |          |          |  |  |  |      |          |          |          |  |  |     |          |          |          |          |  |      |          |          |          |          |          |      |          |          |          |          |          |
| 2 B                                                                                                                                    | 2.067424                                                                                                                                                                                                                                                                                                                                                                                                                                                                                                                                                                                                                                                                                                                                                                                                                                                                                                                                                                                                                                                                                                                                                                                                                                                                                                                                                                                                                                                                                                                                                                                                                                                                                                                                                                                                                                                                                                                                                  | 0.000000 |          |          |          |   |   |      |          |  |  |  |  |     |          |          |  |  |  |     |          |          |          |  |  |      |          |          |          |          |  |     |          |          |          |          |          |      |          |          |          |          |          |      |          |          |          |          |          |      |          |          |          |          |          |     |          |          |          |          |          |      |          |          |          |          |          |      |          |          |          |          |          |  |   |   |   |   |    |      |          |  |  |  |  |      |          |          |  |  |  |      |          |          |          |  |  |     |          |          |          |          |  |      |          |          |          |          |          |      |          |          |          |          |          |
| 3 B                                                                                                                                    | 3.895589                                                                                                                                                                                                                                                                                                                                                                                                                                                                                                                                                                                                                                                                                                                                                                                                                                                                                                                                                                                                                                                                                                                                                                                                                                                                                                                                                                                                                                                                                                                                                                                                                                                                                                                                                                                                                                                                                                                                                  | 3.726200 | 0.000000 |          |          |   |   |      |          |  |  |  |  |     |          |          |  |  |  |     |          |          |          |  |  |      |          |          |          |          |  |     |          |          |          |          |          |      |          |          |          |          |          |      |          |          |          |          |          |      |          |          |          |          |          |     |          |          |          |          |          |      |          |          |          |          |          |      |          |          |          |          |          |  |   |   |   |   |    |      |          |  |  |  |  |      |          |          |  |  |  |      |          |          |          |  |  |     |          |          |          |          |  |      |          |          |          |          |          |      |          |          |          |          |          |
| 4 Os                                                                                                                                   | 2.925600                                                                                                                                                                                                                                                                                                                                                                                                                                                                                                                                                                                                                                                                                                                                                                                                                                                                                                                                                                                                                                                                                                                                                                                                                                                                                                                                                                                                                                                                                                                                                                                                                                                                                                                                                                                                                                                                                                                                                  | 3.895589 | 2.067424 | 0.000000 |          |   |   |      |          |  |  |  |  |     |          |          |  |  |  |     |          |          |          |  |  |      |          |          |          |          |  |     |          |          |          |          |          |      |          |          |          |          |          |      |          |          |          |          |          |      |          |          |          |          |          |     |          |          |          |          |          |      |          |          |          |          |          |      |          |          |          |          |          |  |   |   |   |   |    |      |          |  |  |  |  |      |          |          |  |  |  |      |          |          |          |  |  |     |          |          |          |          |  |      |          |          |          |          |          |      |          |          |          |          |          |
| 5 B                                                                                                                                    | 2.149069                                                                                                                                                                                                                                                                                                                                                                                                                                                                                                                                                                                                                                                                                                                                                                                                                                                                                                                                                                                                                                                                                                                                                                                                                                                                                                                                                                                                                                                                                                                                                                                                                                                                                                                                                                                                                                                                                                                                                  | 3.057030 | 3.057030 | 2.149069 | 0.000000 |   |   |      |          |  |  |  |  |     |          |          |  |  |  |     |          |          |          |  |  |      |          |          |          |          |  |     |          |          |          |          |          |      |          |          |          |          |          |      |          |          |          |          |          |      |          |          |          |          |          |     |          |          |          |          |          |      |          |          |          |          |          |      |          |          |          |          |          |  |   |   |   |   |    |      |          |  |  |  |  |      |          |          |  |  |  |      |          |          |          |  |  |     |          |          |          |          |  |      |          |          |          |          |          |      |          |          |          |          |          |
| 6 B                                                                                                                                    | 2.325863                                                                                                                                                                                                                                                                                                                                                                                                                                                                                                                                                                                                                                                                                                                                                                                                                                                                                                                                                                                                                                                                                                                                                                                                                                                                                                                                                                                                                                                                                                                                                                                                                                                                                                                                                                                                                                                                                                                                                  | 1.745983 | 3.039354 | 3.204538 | 3.446641 |   |   |      |          |  |  |  |  |     |          |          |  |  |  |     |          |          |          |  |  |      |          |          |          |          |  |     |          |          |          |          |          |      |          |          |          |          |          |      |          |          |          |          |          |      |          |          |          |          |          |     |          |          |          |          |          |      |          |          |          |          |          |      |          |          |          |          |          |  |   |   |   |   |    |      |          |  |  |  |  |      |          |          |  |  |  |      |          |          |          |  |  |     |          |          |          |          |  |      |          |          |          |          |          |      |          |          |          |          |          |
| 7 B                                                                                                                                    | 2.149069                                                                                                                                                                                                                                                                                                                                                                                                                                                                                                                                                                                                                                                                                                                                                                                                                                                                                                                                                                                                                                                                                                                                                                                                                                                                                                                                                                                                                                                                                                                                                                                                                                                                                                                                                                                                                                                                                                                                                  | 3.057030 | 3.057030 | 2.149069 | 3.128800 |   |   |      |          |  |  |  |  |     |          |          |  |  |  |     |          |          |          |  |  |      |          |          |          |          |  |     |          |          |          |          |          |      |          |          |          |          |          |      |          |          |          |          |          |      |          |          |          |          |          |     |          |          |          |          |          |      |          |          |          |          |          |      |          |          |          |          |          |  |   |   |   |   |    |      |          |  |  |  |  |      |          |          |  |  |  |      |          |          |          |  |  |     |          |          |          |          |  |      |          |          |          |          |          |      |          |          |          |          |          |
| 8 B                                                                                                                                    | 2.325863                                                                                                                                                                                                                                                                                                                                                                                                                                                                                                                                                                                                                                                                                                                                                                                                                                                                                                                                                                                                                                                                                                                                                                                                                                                                                                                                                                                                                                                                                                                                                                                                                                                                                                                                                                                                                                                                                                                                                  | 1.745983 | 3.039354 | 3.204538 | 1.797243 |   |   |      |          |  |  |  |  |     |          |          |  |  |  |     |          |          |          |  |  |      |          |          |          |          |  |     |          |          |          |          |          |      |          |          |          |          |          |      |          |          |          |          |          |      |          |          |          |          |          |     |          |          |          |          |          |      |          |          |          |          |          |      |          |          |          |          |          |  |   |   |   |   |    |      |          |  |  |  |  |      |          |          |  |  |  |      |          |          |          |  |  |     |          |          |          |          |  |      |          |          |          |          |          |      |          |          |          |          |          |
| 9 B                                                                                                                                    | 3.204538                                                                                                                                                                                                                                                                                                                                                                                                                                                                                                                                                                                                                                                                                                                                                                                                                                                                                                                                                                                                                                                                                                                                                                                                                                                                                                                                                                                                                                                                                                                                                                                                                                                                                                                                                                                                                                                                                                                                                  | 3.039354 | 1.745983 | 2.325863 | 3.446641 |   |   |      |          |  |  |  |  |     |          |          |  |  |  |     |          |          |          |  |  |      |          |          |          |          |  |     |          |          |          |          |          |      |          |          |          |          |          |      |          |          |          |          |          |      |          |          |          |          |          |     |          |          |          |          |          |      |          |          |          |          |          |      |          |          |          |          |          |  |   |   |   |   |    |      |          |  |  |  |  |      |          |          |  |  |  |      |          |          |          |  |  |     |          |          |          |          |  |      |          |          |          |          |          |      |          |          |          |          |          |
| 10 B                                                                                                                                   | 3.204538                                                                                                                                                                                                                                                                                                                                                                                                                                                                                                                                                                                                                                                                                                                                                                                                                                                                                                                                                                                                                                                                                                                                                                                                                                                                                                                                                                                                                                                                                                                                                                                                                                                                                                                                                                                                                                                                                                                                                  | 3.039354 | 1.745983 | 2.325863 | 1.797243 |   |   |      |          |  |  |  |  |     |          |          |  |  |  |     |          |          |          |  |  |      |          |          |          |          |  |     |          |          |          |          |          |      |          |          |          |          |          |      |          |          |          |          |          |      |          |          |          |          |          |     |          |          |          |          |          |      |          |          |          |          |          |      |          |          |          |          |          |  |   |   |   |   |    |      |          |  |  |  |  |      |          |          |  |  |  |      |          |          |          |  |  |     |          |          |          |          |  |      |          |          |          |          |          |      |          |          |          |          |          |
| 11 B                                                                                                                                   | 3.126686                                                                                                                                                                                                                                                                                                                                                                                                                                                                                                                                                                                                                                                                                                                                                                                                                                                                                                                                                                                                                                                                                                                                                                                                                                                                                                                                                                                                                                                                                                                                                                                                                                                                                                                                                                                                                                                                                                                                                  | 2.002876 | 2.002876 | 3.126686 | 3.022630 |   |   |      |          |  |  |  |  |     |          |          |  |  |  |     |          |          |          |  |  |      |          |          |          |          |  |     |          |          |          |          |          |      |          |          |          |          |          |      |          |          |          |          |          |      |          |          |          |          |          |     |          |          |          |          |          |      |          |          |          |          |          |      |          |          |          |          |          |  |   |   |   |   |    |      |          |  |  |  |  |      |          |          |  |  |  |      |          |          |          |  |  |     |          |          |          |          |  |      |          |          |          |          |          |      |          |          |          |          |          |
|                                                                                                                                        | 6                                                                                                                                                                                                                                                                                                                                                                                                                                                                                                                                                                                                                                                                                                                                                                                                                                                                                                                                                                                                                                                                                                                                                                                                                                                                                                                                                                                                                                                                                                                                                                                                                                                                                                                                                                                                                                                                                                                                                         | 7        | 8        | 9        | 10       |   |   |      |          |  |  |  |  |     |          |          |  |  |  |     |          |          |          |  |  |      |          |          |          |          |  |     |          |          |          |          |          |      |          |          |          |          |          |      |          |          |          |          |          |      |          |          |          |          |          |     |          |          |          |          |          |      |          |          |          |          |          |      |          |          |          |          |          |  |   |   |   |   |    |      |          |  |  |  |  |      |          |          |  |  |  |      |          |          |          |  |  |     |          |          |          |          |  |      |          |          |          |          |          |      |          |          |          |          |          |
| 6 B                                                                                                                                    | 0.000000                                                                                                                                                                                                                                                                                                                                                                                                                                                                                                                                                                                                                                                                                                                                                                                                                                                                                                                                                                                                                                                                                                                                                                                                                                                                                                                                                                                                                                                                                                                                                                                                                                                                                                                                                                                                                                                                                                                                                  |          |          |          |          |   |   |      |          |  |  |  |  |     |          |          |  |  |  |     |          |          |          |  |  |      |          |          |          |          |  |     |          |          |          |          |          |      |          |          |          |          |          |      |          |          |          |          |          |      |          |          |          |          |          |     |          |          |          |          |          |      |          |          |          |          |          |      |          |          |          |          |          |  |   |   |   |   |    |      |          |  |  |  |  |      |          |          |  |  |  |      |          |          |          |  |  |     |          |          |          |          |  |      |          |          |          |          |          |      |          |          |          |          |          |
| 7 B                                                                                                                                    | 1.797243                                                                                                                                                                                                                                                                                                                                                                                                                                                                                                                                                                                                                                                                                                                                                                                                                                                                                                                                                                                                                                                                                                                                                                                                                                                                                                                                                                                                                                                                                                                                                                                                                                                                                                                                                                                                                                                                                                                                                  | 0.000000 |          |          |          |   |   |      |          |  |  |  |  |     |          |          |  |  |  |     |          |          |          |  |  |      |          |          |          |          |  |     |          |          |          |          |          |      |          |          |          |          |          |      |          |          |          |          |          |      |          |          |          |          |          |     |          |          |          |          |          |      |          |          |          |          |          |      |          |          |          |          |          |  |   |   |   |   |    |      |          |  |  |  |  |      |          |          |  |  |  |      |          |          |          |  |  |     |          |          |          |          |  |      |          |          |          |          |          |      |          |          |          |          |          |
| 8 B                                                                                                                                    | 2.764400                                                                                                                                                                                                                                                                                                                                                                                                                                                                                                                                                                                                                                                                                                                                                                                                                                                                                                                                                                                                                                                                                                                                                                                                                                                                                                                                                                                                                                                                                                                                                                                                                                                                                                                                                                                                                                                                                                                                                  | 3.446641 | 0.000000 |          |          |   |   |      |          |  |  |  |  |     |          |          |  |  |  |     |          |          |          |  |  |      |          |          |          |          |  |     |          |          |          |          |          |      |          |          |          |          |          |      |          |          |          |          |          |      |          |          |          |          |          |     |          |          |          |          |          |      |          |          |          |          |          |      |          |          |          |          |          |  |   |   |   |   |    |      |          |  |  |  |  |      |          |          |  |  |  |      |          |          |          |  |  |     |          |          |          |          |  |      |          |          |          |          |          |      |          |          |          |          |          |
| 9 B                                                                                                                                    | 1.661000                                                                                                                                                                                                                                                                                                                                                                                                                                                                                                                                                                                                                                                                                                                                                                                                                                                                                                                                                                                                                                                                                                                                                                                                                                                                                                                                                                                                                                                                                                                                                                                                                                                                                                                                                                                                                                                                                                                                                  | 1.797243 | 3.225032 | 0.000000 |          |   |   |      |          |  |  |  |  |     |          |          |  |  |  |     |          |          |          |  |  |      |          |          |          |          |  |     |          |          |          |          |          |      |          |          |          |          |          |      |          |          |          |          |          |      |          |          |          |          |          |     |          |          |          |          |          |      |          |          |          |          |          |      |          |          |          |          |          |  |   |   |   |   |    |      |          |  |  |  |  |      |          |          |  |  |  |      |          |          |          |  |  |     |          |          |          |          |  |      |          |          |          |          |          |      |          |          |          |          |          |
| 10 B                                                                                                                                   | 3.225032                                                                                                                                                                                                                                                                                                                                                                                                                                                                                                                                                                                                                                                                                                                                                                                                                                                                                                                                                                                                                                                                                                                                                                                                                                                                                                                                                                                                                                                                                                                                                                                                                                                                                                                                                                                                                                                                                                                                                  | 3.446641 | 1.661000 | 2.764400 | 0.000000 |   |   |      |          |  |  |  |  |     |          |          |  |  |  |     |          |          |          |  |  |      |          |          |          |          |  |     |          |          |          |          |          |      |          |          |          |          |          |      |          |          |          |          |          |      |          |          |          |          |          |     |          |          |          |          |          |      |          |          |          |          |          |      |          |          |          |          |          |  |   |   |   |   |    |      |          |  |  |  |  |      |          |          |  |  |  |      |          |          |          |  |  |     |          |          |          |          |  |      |          |          |          |          |          |      |          |          |          |          |          |
| 11 B                                                                                                                                   | 1.898951                                                                                                                                                                                                                                                                                                                                                                                                                                                                                                                                                                                                                                                                                                                                                                                                                                                                                                                                                                                                                                                                                                                                                                                                                                                                                                                                                                                                                                                                                                                                                                                                                                                                                                                                                                                                                                                                                                                                                  | 3.022630 | 1.898951 | 1.898951 | 1.898951 |   |   |      |          |  |  |  |  |     |          |          |  |  |  |     |          |          |          |  |  |      |          |          |          |          |  |     |          |          |          |          |          |      |          |          |          |          |          |      |          |          |          |          |          |      |          |          |          |          |          |     |          |          |          |          |          |      |          |          |          |          |          |      |          |          |          |          |          |  |   |   |   |   |    |      |          |  |  |  |  |      |          |          |  |  |  |      |          |          |          |  |  |     |          |          |          |          |  |      |          |          |          |          |          |      |          |          |          |          |          |

| 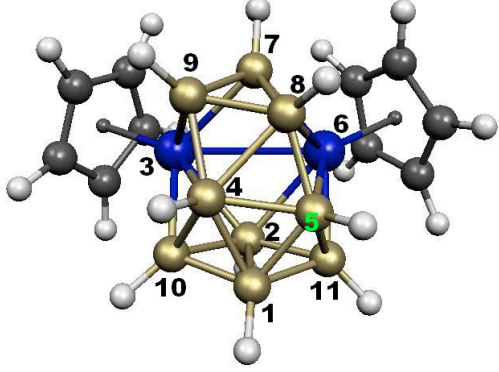 <p>13. -797.74945369 +26.9</p>   | <table border="1"> <thead> <tr> <th></th> <th>1</th> <th>2</th> <th>3</th> <th>4</th> <th>5</th> </tr> </thead> <tbody> <tr><td>1 B</td><td>0.000000</td><td></td><td></td><td></td><td></td></tr> <tr><td>2 B</td><td>2.018668</td><td>0.000000</td><td></td><td></td><td></td></tr> <tr><td>3 Os</td><td>3.195305</td><td>2.227189</td><td>0.000000</td><td></td><td></td></tr> <tr><td>4 B</td><td>1.857441</td><td>2.753057</td><td>2.396482</td><td>0.000000</td><td></td></tr> <tr><td>5 B</td><td>1.765146</td><td>2.731192</td><td>3.423035</td><td>1.877055</td><td>0.000000</td></tr> <tr><td>6 Os</td><td>3.140195</td><td>2.272861</td><td>2.844398</td><td>3.140093</td><td>2.297171</td></tr> <tr><td>7 B</td><td>3.955251</td><td>3.359887</td><td>2.227845</td><td>2.839212</td><td>3.055618</td></tr> <tr><td>8 B</td><td>3.123019</td><td>3.465627</td><td>3.014536</td><td>1.995573</td><td>1.766612</td></tr> <tr><td>9 B</td><td>3.524502</td><td>3.615004</td><td>2.127897</td><td>1.809978</td><td>2.972231</td></tr> <tr><td>10 B</td><td>1.731381</td><td>1.818256</td><td>2.052567</td><td>1.871266</td><td>2.956269</td></tr> <tr><td>11 B</td><td>1.727312</td><td>1.789618</td><td>3.546296</td><td>2.927296</td><td>1.738837</td></tr> <tr> <td></td> <td>6</td> <td>7</td> <td>8</td> <td>9</td> <td>10</td> </tr> <tr><td>6 Os</td><td>0.000000</td><td></td><td></td><td></td><td></td></tr> <tr><td>7 B</td><td>2.107650</td><td>0.000000</td><td></td><td></td><td></td></tr> <tr><td>8 B</td><td>2.321682</td><td>1.737739</td><td>0.000000</td><td></td><td></td></tr> <tr><td>9 B</td><td>3.243282</td><td>1.732275</td><td>1.745976</td><td>0.000000</td><td></td></tr> <tr><td>10 B</td><td>3.510421</td><td>3.705154</td><td>3.523457</td><td>3.062882</td><td>0.000000</td></tr> <tr><td>11 B</td><td>2.077379</td><td>3.735678</td><td>3.137283</td><td>4.071752</td><td>2.886802</td></tr> </tbody> </table>  |          | 1        | 2        | 3        | 4 | 5 | 1 B | 0.000000 |  |  |  |  | 2 B | 2.018668 | 0.000000 |  |  |  | 3 Os | 3.195305 | 2.227189 | 0.000000 |  |  | 4 B | 1.857441 | 2.753057 | 2.396482 | 0.000000 |  | 5 B | 1.765146 | 2.731192 | 3.423035 | 1.877055 | 0.000000 | 6 Os | 3.140195 | 2.272861 | 2.844398 | 3.140093 | 2.297171 | 7 B  | 3.955251 | 3.359887 | 2.227845 | 2.839212 | 3.055618 | 8 B  | 3.123019 | 3.465627 | 3.014536 | 1.995573 | 1.766612 | 9 B | 3.524502 | 3.615004 | 2.127897 | 1.809978 | 2.972231 | 10 B  | 1.731381 | 1.818256 | 2.052567 | 1.871266 | 2.956269 | 11 B  | 1.727312 | 1.789618 | 3.546296 | 2.927296 | 1.738837 |  | 6 | 7 | 8 | 9 | 10 | 6 Os | 0.000000 |  |  |  |  | 7 B  | 2.107650 | 0.000000 |  |  |  | 8 B  | 2.321682 | 1.737739 | 0.000000 |  |  | 9 B | 3.243282 | 1.732275 | 1.745976 | 0.000000 |  | 10 B  | 3.510421 | 3.705154 | 3.523457 | 3.062882 | 0.000000 | 11 B  | 2.077379 | 3.735678 | 3.137283 | 4.071752 | 2.886802 |
|--------------------------------------------------------------------------------------------------------------------|-----------------------------------------------------------------------------------------------------------------------------------------------------------------------------------------------------------------------------------------------------------------------------------------------------------------------------------------------------------------------------------------------------------------------------------------------------------------------------------------------------------------------------------------------------------------------------------------------------------------------------------------------------------------------------------------------------------------------------------------------------------------------------------------------------------------------------------------------------------------------------------------------------------------------------------------------------------------------------------------------------------------------------------------------------------------------------------------------------------------------------------------------------------------------------------------------------------------------------------------------------------------------------------------------------------------------------------------------------------------------------------------------------------------------------------------------------------------------------------------------------------------------------------------------------------------------------------------------------------------------------------------------------------------------------------------------------------------------------------------------------------------------------------------------------------------------------------------------------------------------------------------------------------------------------------------------------------|----------|----------|----------|----------|---|---|-----|----------|--|--|--|--|-----|----------|----------|--|--|--|------|----------|----------|----------|--|--|-----|----------|----------|----------|----------|--|-----|----------|----------|----------|----------|----------|------|----------|----------|----------|----------|----------|------|----------|----------|----------|----------|----------|------|----------|----------|----------|----------|----------|-----|----------|----------|----------|----------|----------|-------|----------|----------|----------|----------|----------|-------|----------|----------|----------|----------|----------|--|---|---|---|---|----|------|----------|--|--|--|--|------|----------|----------|--|--|--|------|----------|----------|----------|--|--|-----|----------|----------|----------|----------|--|-------|----------|----------|----------|----------|----------|-------|----------|----------|----------|----------|----------|
|                                                                                                                    | 1                                                                                                                                                                                                                                                                                                                                                                                                                                                                                                                                                                                                                                                                                                                                                                                                                                                                                                                                                                                                                                                                                                                                                                                                                                                                                                                                                                                                                                                                                                                                                                                                                                                                                                                                                                                                                                                                                                                                                         | 2        | 3        | 4        | 5        |   |   |     |          |  |  |  |  |     |          |          |  |  |  |      |          |          |          |  |  |     |          |          |          |          |  |     |          |          |          |          |          |      |          |          |          |          |          |      |          |          |          |          |          |      |          |          |          |          |          |     |          |          |          |          |          |       |          |          |          |          |          |       |          |          |          |          |          |  |   |   |   |   |    |      |          |  |  |  |  |      |          |          |  |  |  |      |          |          |          |  |  |     |          |          |          |          |  |       |          |          |          |          |          |       |          |          |          |          |          |
| 1 B                                                                                                                | 0.000000                                                                                                                                                                                                                                                                                                                                                                                                                                                                                                                                                                                                                                                                                                                                                                                                                                                                                                                                                                                                                                                                                                                                                                                                                                                                                                                                                                                                                                                                                                                                                                                                                                                                                                                                                                                                                                                                                                                                                  |          |          |          |          |   |   |     |          |  |  |  |  |     |          |          |  |  |  |      |          |          |          |  |  |     |          |          |          |          |  |     |          |          |          |          |          |      |          |          |          |          |          |      |          |          |          |          |          |      |          |          |          |          |          |     |          |          |          |          |          |       |          |          |          |          |          |       |          |          |          |          |          |  |   |   |   |   |    |      |          |  |  |  |  |      |          |          |  |  |  |      |          |          |          |  |  |     |          |          |          |          |  |       |          |          |          |          |          |       |          |          |          |          |          |
| 2 B                                                                                                                | 2.018668                                                                                                                                                                                                                                                                                                                                                                                                                                                                                                                                                                                                                                                                                                                                                                                                                                                                                                                                                                                                                                                                                                                                                                                                                                                                                                                                                                                                                                                                                                                                                                                                                                                                                                                                                                                                                                                                                                                                                  | 0.000000 |          |          |          |   |   |     |          |  |  |  |  |     |          |          |  |  |  |      |          |          |          |  |  |     |          |          |          |          |  |     |          |          |          |          |          |      |          |          |          |          |          |      |          |          |          |          |          |      |          |          |          |          |          |     |          |          |          |          |          |       |          |          |          |          |          |       |          |          |          |          |          |  |   |   |   |   |    |      |          |  |  |  |  |      |          |          |  |  |  |      |          |          |          |  |  |     |          |          |          |          |  |       |          |          |          |          |          |       |          |          |          |          |          |
| 3 Os                                                                                                               | 3.195305                                                                                                                                                                                                                                                                                                                                                                                                                                                                                                                                                                                                                                                                                                                                                                                                                                                                                                                                                                                                                                                                                                                                                                                                                                                                                                                                                                                                                                                                                                                                                                                                                                                                                                                                                                                                                                                                                                                                                  | 2.227189 | 0.000000 |          |          |   |   |     |          |  |  |  |  |     |          |          |  |  |  |      |          |          |          |  |  |     |          |          |          |          |  |     |          |          |          |          |          |      |          |          |          |          |          |      |          |          |          |          |          |      |          |          |          |          |          |     |          |          |          |          |          |       |          |          |          |          |          |       |          |          |          |          |          |  |   |   |   |   |    |      |          |  |  |  |  |      |          |          |  |  |  |      |          |          |          |  |  |     |          |          |          |          |  |       |          |          |          |          |          |       |          |          |          |          |          |
| 4 B                                                                                                                | 1.857441                                                                                                                                                                                                                                                                                                                                                                                                                                                                                                                                                                                                                                                                                                                                                                                                                                                                                                                                                                                                                                                                                                                                                                                                                                                                                                                                                                                                                                                                                                                                                                                                                                                                                                                                                                                                                                                                                                                                                  | 2.753057 | 2.396482 | 0.000000 |          |   |   |     |          |  |  |  |  |     |          |          |  |  |  |      |          |          |          |  |  |     |          |          |          |          |  |     |          |          |          |          |          |      |          |          |          |          |          |      |          |          |          |          |          |      |          |          |          |          |          |     |          |          |          |          |          |       |          |          |          |          |          |       |          |          |          |          |          |  |   |   |   |   |    |      |          |  |  |  |  |      |          |          |  |  |  |      |          |          |          |  |  |     |          |          |          |          |  |       |          |          |          |          |          |       |          |          |          |          |          |
| 5 B                                                                                                                | 1.765146                                                                                                                                                                                                                                                                                                                                                                                                                                                                                                                                                                                                                                                                                                                                                                                                                                                                                                                                                                                                                                                                                                                                                                                                                                                                                                                                                                                                                                                                                                                                                                                                                                                                                                                                                                                                                                                                                                                                                  | 2.731192 | 3.423035 | 1.877055 | 0.000000 |   |   |     |          |  |  |  |  |     |          |          |  |  |  |      |          |          |          |  |  |     |          |          |          |          |  |     |          |          |          |          |          |      |          |          |          |          |          |      |          |          |          |          |          |      |          |          |          |          |          |     |          |          |          |          |          |       |          |          |          |          |          |       |          |          |          |          |          |  |   |   |   |   |    |      |          |  |  |  |  |      |          |          |  |  |  |      |          |          |          |  |  |     |          |          |          |          |  |       |          |          |          |          |          |       |          |          |          |          |          |
| 6 Os                                                                                                               | 3.140195                                                                                                                                                                                                                                                                                                                                                                                                                                                                                                                                                                                                                                                                                                                                                                                                                                                                                                                                                                                                                                                                                                                                                                                                                                                                                                                                                                                                                                                                                                                                                                                                                                                                                                                                                                                                                                                                                                                                                  | 2.272861 | 2.844398 | 3.140093 | 2.297171 |   |   |     |          |  |  |  |  |     |          |          |  |  |  |      |          |          |          |  |  |     |          |          |          |          |  |     |          |          |          |          |          |      |          |          |          |          |          |      |          |          |          |          |          |      |          |          |          |          |          |     |          |          |          |          |          |       |          |          |          |          |          |       |          |          |          |          |          |  |   |   |   |   |    |      |          |  |  |  |  |      |          |          |  |  |  |      |          |          |          |  |  |     |          |          |          |          |  |       |          |          |          |          |          |       |          |          |          |          |          |
| 7 B                                                                                                                | 3.955251                                                                                                                                                                                                                                                                                                                                                                                                                                                                                                                                                                                                                                                                                                                                                                                                                                                                                                                                                                                                                                                                                                                                                                                                                                                                                                                                                                                                                                                                                                                                                                                                                                                                                                                                                                                                                                                                                                                                                  | 3.359887 | 2.227845 | 2.839212 | 3.055618 |   |   |     |          |  |  |  |  |     |          |          |  |  |  |      |          |          |          |  |  |     |          |          |          |          |  |     |          |          |          |          |          |      |          |          |          |          |          |      |          |          |          |          |          |      |          |          |          |          |          |     |          |          |          |          |          |       |          |          |          |          |          |       |          |          |          |          |          |  |   |   |   |   |    |      |          |  |  |  |  |      |          |          |  |  |  |      |          |          |          |  |  |     |          |          |          |          |  |       |          |          |          |          |          |       |          |          |          |          |          |
| 8 B                                                                                                                | 3.123019                                                                                                                                                                                                                                                                                                                                                                                                                                                                                                                                                                                                                                                                                                                                                                                                                                                                                                                                                                                                                                                                                                                                                                                                                                                                                                                                                                                                                                                                                                                                                                                                                                                                                                                                                                                                                                                                                                                                                  | 3.465627 | 3.014536 | 1.995573 | 1.766612 |   |   |     |          |  |  |  |  |     |          |          |  |  |  |      |          |          |          |  |  |     |          |          |          |          |  |     |          |          |          |          |          |      |          |          |          |          |          |      |          |          |          |          |          |      |          |          |          |          |          |     |          |          |          |          |          |       |          |          |          |          |          |       |          |          |          |          |          |  |   |   |   |   |    |      |          |  |  |  |  |      |          |          |  |  |  |      |          |          |          |  |  |     |          |          |          |          |  |       |          |          |          |          |          |       |          |          |          |          |          |
| 9 B                                                                                                                | 3.524502                                                                                                                                                                                                                                                                                                                                                                                                                                                                                                                                                                                                                                                                                                                                                                                                                                                                                                                                                                                                                                                                                                                                                                                                                                                                                                                                                                                                                                                                                                                                                                                                                                                                                                                                                                                                                                                                                                                                                  | 3.615004 | 2.127897 | 1.809978 | 2.972231 |   |   |     |          |  |  |  |  |     |          |          |  |  |  |      |          |          |          |  |  |     |          |          |          |          |  |     |          |          |          |          |          |      |          |          |          |          |          |      |          |          |          |          |          |      |          |          |          |          |          |     |          |          |          |          |          |       |          |          |          |          |          |       |          |          |          |          |          |  |   |   |   |   |    |      |          |  |  |  |  |      |          |          |  |  |  |      |          |          |          |  |  |     |          |          |          |          |  |       |          |          |          |          |          |       |          |          |          |          |          |
| 10 B                                                                                                               | 1.731381                                                                                                                                                                                                                                                                                                                                                                                                                                                                                                                                                                                                                                                                                                                                                                                                                                                                                                                                                                                                                                                                                                                                                                                                                                                                                                                                                                                                                                                                                                                                                                                                                                                                                                                                                                                                                                                                                                                                                  | 1.818256 | 2.052567 | 1.871266 | 2.956269 |   |   |     |          |  |  |  |  |     |          |          |  |  |  |      |          |          |          |  |  |     |          |          |          |          |  |     |          |          |          |          |          |      |          |          |          |          |          |      |          |          |          |          |          |      |          |          |          |          |          |     |          |          |          |          |          |       |          |          |          |          |          |       |          |          |          |          |          |  |   |   |   |   |    |      |          |  |  |  |  |      |          |          |  |  |  |      |          |          |          |  |  |     |          |          |          |          |  |       |          |          |          |          |          |       |          |          |          |          |          |
| 11 B                                                                                                               | 1.727312                                                                                                                                                                                                                                                                                                                                                                                                                                                                                                                                                                                                                                                                                                                                                                                                                                                                                                                                                                                                                                                                                                                                                                                                                                                                                                                                                                                                                                                                                                                                                                                                                                                                                                                                                                                                                                                                                                                                                  | 1.789618 | 3.546296 | 2.927296 | 1.738837 |   |   |     |          |  |  |  |  |     |          |          |  |  |  |      |          |          |          |  |  |     |          |          |          |          |  |     |          |          |          |          |          |      |          |          |          |          |          |      |          |          |          |          |          |      |          |          |          |          |          |     |          |          |          |          |          |       |          |          |          |          |          |       |          |          |          |          |          |  |   |   |   |   |    |      |          |  |  |  |  |      |          |          |  |  |  |      |          |          |          |  |  |     |          |          |          |          |  |       |          |          |          |          |          |       |          |          |          |          |          |
|                                                                                                                    | 6                                                                                                                                                                                                                                                                                                                                                                                                                                                                                                                                                                                                                                                                                                                                                                                                                                                                                                                                                                                                                                                                                                                                                                                                                                                                                                                                                                                                                                                                                                                                                                                                                                                                                                                                                                                                                                                                                                                                                         | 7        | 8        | 9        | 10       |   |   |     |          |  |  |  |  |     |          |          |  |  |  |      |          |          |          |  |  |     |          |          |          |          |  |     |          |          |          |          |          |      |          |          |          |          |          |      |          |          |          |          |          |      |          |          |          |          |          |     |          |          |          |          |          |       |          |          |          |          |          |       |          |          |          |          |          |  |   |   |   |   |    |      |          |  |  |  |  |      |          |          |  |  |  |      |          |          |          |  |  |     |          |          |          |          |  |       |          |          |          |          |          |       |          |          |          |          |          |
| 6 Os                                                                                                               | 0.000000                                                                                                                                                                                                                                                                                                                                                                                                                                                                                                                                                                                                                                                                                                                                                                                                                                                                                                                                                                                                                                                                                                                                                                                                                                                                                                                                                                                                                                                                                                                                                                                                                                                                                                                                                                                                                                                                                                                                                  |          |          |          |          |   |   |     |          |  |  |  |  |     |          |          |  |  |  |      |          |          |          |  |  |     |          |          |          |          |  |     |          |          |          |          |          |      |          |          |          |          |          |      |          |          |          |          |          |      |          |          |          |          |          |     |          |          |          |          |          |       |          |          |          |          |          |       |          |          |          |          |          |  |   |   |   |   |    |      |          |  |  |  |  |      |          |          |  |  |  |      |          |          |          |  |  |     |          |          |          |          |  |       |          |          |          |          |          |       |          |          |          |          |          |
| 7 B                                                                                                                | 2.107650                                                                                                                                                                                                                                                                                                                                                                                                                                                                                                                                                                                                                                                                                                                                                                                                                                                                                                                                                                                                                                                                                                                                                                                                                                                                                                                                                                                                                                                                                                                                                                                                                                                                                                                                                                                                                                                                                                                                                  | 0.000000 |          |          |          |   |   |     |          |  |  |  |  |     |          |          |  |  |  |      |          |          |          |  |  |     |          |          |          |          |  |     |          |          |          |          |          |      |          |          |          |          |          |      |          |          |          |          |          |      |          |          |          |          |          |     |          |          |          |          |          |       |          |          |          |          |          |       |          |          |          |          |          |  |   |   |   |   |    |      |          |  |  |  |  |      |          |          |  |  |  |      |          |          |          |  |  |     |          |          |          |          |  |       |          |          |          |          |          |       |          |          |          |          |          |
| 8 B                                                                                                                | 2.321682                                                                                                                                                                                                                                                                                                                                                                                                                                                                                                                                                                                                                                                                                                                                                                                                                                                                                                                                                                                                                                                                                                                                                                                                                                                                                                                                                                                                                                                                                                                                                                                                                                                                                                                                                                                                                                                                                                                                                  | 1.737739 | 0.000000 |          |          |   |   |     |          |  |  |  |  |     |          |          |  |  |  |      |          |          |          |  |  |     |          |          |          |          |  |     |          |          |          |          |          |      |          |          |          |          |          |      |          |          |          |          |          |      |          |          |          |          |          |     |          |          |          |          |          |       |          |          |          |          |          |       |          |          |          |          |          |  |   |   |   |   |    |      |          |  |  |  |  |      |          |          |  |  |  |      |          |          |          |  |  |     |          |          |          |          |  |       |          |          |          |          |          |       |          |          |          |          |          |
| 9 B                                                                                                                | 3.243282                                                                                                                                                                                                                                                                                                                                                                                                                                                                                                                                                                                                                                                                                                                                                                                                                                                                                                                                                                                                                                                                                                                                                                                                                                                                                                                                                                                                                                                                                                                                                                                                                                                                                                                                                                                                                                                                                                                                                  | 1.732275 | 1.745976 | 0.000000 |          |   |   |     |          |  |  |  |  |     |          |          |  |  |  |      |          |          |          |  |  |     |          |          |          |          |  |     |          |          |          |          |          |      |          |          |          |          |          |      |          |          |          |          |          |      |          |          |          |          |          |     |          |          |          |          |          |       |          |          |          |          |          |       |          |          |          |          |          |  |   |   |   |   |    |      |          |  |  |  |  |      |          |          |  |  |  |      |          |          |          |  |  |     |          |          |          |          |  |       |          |          |          |          |          |       |          |          |          |          |          |
| 10 B                                                                                                               | 3.510421                                                                                                                                                                                                                                                                                                                                                                                                                                                                                                                                                                                                                                                                                                                                                                                                                                                                                                                                                                                                                                                                                                                                                                                                                                                                                                                                                                                                                                                                                                                                                                                                                                                                                                                                                                                                                                                                                                                                                  | 3.705154 | 3.523457 | 3.062882 | 0.000000 |   |   |     |          |  |  |  |  |     |          |          |  |  |  |      |          |          |          |  |  |     |          |          |          |          |  |     |          |          |          |          |          |      |          |          |          |          |          |      |          |          |          |          |          |      |          |          |          |          |          |     |          |          |          |          |          |       |          |          |          |          |          |       |          |          |          |          |          |  |   |   |   |   |    |      |          |  |  |  |  |      |          |          |  |  |  |      |          |          |          |  |  |     |          |          |          |          |  |       |          |          |          |          |          |       |          |          |          |          |          |
| 11 B                                                                                                               | 2.077379                                                                                                                                                                                                                                                                                                                                                                                                                                                                                                                                                                                                                                                                                                                                                                                                                                                                                                                                                                                                                                                                                                                                                                                                                                                                                                                                                                                                                                                                                                                                                                                                                                                                                                                                                                                                                                                                                                                                                  | 3.735678 | 3.137283 | 4.071752 | 2.886802 |   |   |     |          |  |  |  |  |     |          |          |  |  |  |      |          |          |          |  |  |     |          |          |          |          |  |     |          |          |          |          |          |      |          |          |          |          |          |      |          |          |          |          |          |      |          |          |          |          |          |     |          |          |          |          |          |       |          |          |          |          |          |       |          |          |          |          |          |  |   |   |   |   |    |      |          |  |  |  |  |      |          |          |  |  |  |      |          |          |          |  |  |     |          |          |          |          |  |       |          |          |          |          |          |       |          |          |          |          |          |
|  <p>14. -797.74918738 +27.0</p>  | <table border="1"> <thead> <tr> <th></th> <th>1</th> <th>2</th> <th>3</th> <th>4</th> <th>5</th> </tr> </thead> <tbody> <tr><td>1 B</td><td>0.000000</td><td></td><td></td><td></td><td></td></tr> <tr><td>2 B</td><td>2.821733</td><td>0.000000</td><td></td><td></td><td></td></tr> <tr><td>3 B</td><td>2.857203</td><td>1.762940</td><td>0.000000</td><td></td><td></td></tr> <tr><td>4 B</td><td>1.867583</td><td>2.892458</td><td>1.769868</td><td>0.000000</td><td></td></tr> <tr><td>5 B</td><td>1.817943</td><td>2.744420</td><td>3.337910</td><td>3.068986</td><td>0.000000</td></tr> <tr><td>6 B</td><td>2.904898</td><td>1.759330</td><td>3.101254</td><td>3.721781</td><td>1.747757</td></tr> <tr><td>7 Os</td><td>3.272226</td><td>2.334772</td><td>2.365294</td><td>3.117160</td><td>2.378480</td></tr> <tr><td>8 Os</td><td>2.276633</td><td>3.759787</td><td>3.210173</td><td>2.328677</td><td>2.175148</td></tr> <tr><td>9 B</td><td>3.105007</td><td>3.141683</td><td>1.779375</td><td>1.808007</td><td>3.356191</td></tr> <tr><td>10 B</td><td>1.777040</td><td>1.792209</td><td>1.793651</td><td>1.753163</td><td>2.882032</td></tr> <tr><td>11 B</td><td>1.796469</td><td>1.804560</td><td>2.936698</td><td>3.007016</td><td>1.856744</td></tr> <tr> <td></td> <td>6</td> <td>7</td> <td>8</td> <td>9</td> <td>10</td> </tr> <tr><td>6 B</td><td>0.000000</td><td></td><td></td><td></td><td></td></tr> <tr><td>7 Os</td><td>2.099615</td><td>0.000000</td><td></td><td></td><td></td></tr> <tr><td>8 Os</td><td>3.493736</td><td>2.558949</td><td>0.000000</td><td></td><td></td></tr> <tr><td>9 B</td><td>3.753353</td><td>2.168917</td><td>2.141469</td><td>0.000000</td><td></td></tr> <tr><td>10 B</td><td>2.923409</td><td>3.290150</td><td>3.400270</td><td>3.016202</td><td>0.000000</td></tr> <tr><td>11 B</td><td>1.720247</td><td>3.127193</td><td>3.487170</td><td>3.865590</td><td>1.774823</td></tr> </tbody> </table> |          | 1        | 2        | 3        | 4 | 5 | 1 B | 0.000000 |  |  |  |  | 2 B | 2.821733 | 0.000000 |  |  |  | 3 B  | 2.857203 | 1.762940 | 0.000000 |  |  | 4 B | 1.867583 | 2.892458 | 1.769868 | 0.000000 |  | 5 B | 1.817943 | 2.744420 | 3.337910 | 3.068986 | 0.000000 | 6 B  | 2.904898 | 1.759330 | 3.101254 | 3.721781 | 1.747757 | 7 Os | 3.272226 | 2.334772 | 2.365294 | 3.117160 | 2.378480 | 8 Os | 2.276633 | 3.759787 | 3.210173 | 2.328677 | 2.175148 | 9 B | 3.105007 | 3.141683 | 1.779375 | 1.808007 | 3.356191 | 10 B  | 1.777040 | 1.792209 | 1.793651 | 1.753163 | 2.882032 | 11 B  | 1.796469 | 1.804560 | 2.936698 | 3.007016 | 1.856744 |  | 6 | 7 | 8 | 9 | 10 | 6 B  | 0.000000 |  |  |  |  | 7 Os | 2.099615 | 0.000000 |  |  |  | 8 Os | 3.493736 | 2.558949 | 0.000000 |  |  | 9 B | 3.753353 | 2.168917 | 2.141469 | 0.000000 |  | 10 B  | 2.923409 | 3.290150 | 3.400270 | 3.016202 | 0.000000 | 11 B  | 1.720247 | 3.127193 | 3.487170 | 3.865590 | 1.774823 |
|                                                                                                                    | 1                                                                                                                                                                                                                                                                                                                                                                                                                                                                                                                                                                                                                                                                                                                                                                                                                                                                                                                                                                                                                                                                                                                                                                                                                                                                                                                                                                                                                                                                                                                                                                                                                                                                                                                                                                                                                                                                                                                                                         | 2        | 3        | 4        | 5        |   |   |     |          |  |  |  |  |     |          |          |  |  |  |      |          |          |          |  |  |     |          |          |          |          |  |     |          |          |          |          |          |      |          |          |          |          |          |      |          |          |          |          |          |      |          |          |          |          |          |     |          |          |          |          |          |       |          |          |          |          |          |       |          |          |          |          |          |  |   |   |   |   |    |      |          |  |  |  |  |      |          |          |  |  |  |      |          |          |          |  |  |     |          |          |          |          |  |       |          |          |          |          |          |       |          |          |          |          |          |
| 1 B                                                                                                                | 0.000000                                                                                                                                                                                                                                                                                                                                                                                                                                                                                                                                                                                                                                                                                                                                                                                                                                                                                                                                                                                                                                                                                                                                                                                                                                                                                                                                                                                                                                                                                                                                                                                                                                                                                                                                                                                                                                                                                                                                                  |          |          |          |          |   |   |     |          |  |  |  |  |     |          |          |  |  |  |      |          |          |          |  |  |     |          |          |          |          |  |     |          |          |          |          |          |      |          |          |          |          |          |      |          |          |          |          |          |      |          |          |          |          |          |     |          |          |          |          |          |       |          |          |          |          |          |       |          |          |          |          |          |  |   |   |   |   |    |      |          |  |  |  |  |      |          |          |  |  |  |      |          |          |          |  |  |     |          |          |          |          |  |       |          |          |          |          |          |       |          |          |          |          |          |
| 2 B                                                                                                                | 2.821733                                                                                                                                                                                                                                                                                                                                                                                                                                                                                                                                                                                                                                                                                                                                                                                                                                                                                                                                                                                                                                                                                                                                                                                                                                                                                                                                                                                                                                                                                                                                                                                                                                                                                                                                                                                                                                                                                                                                                  | 0.000000 |          |          |          |   |   |     |          |  |  |  |  |     |          |          |  |  |  |      |          |          |          |  |  |     |          |          |          |          |  |     |          |          |          |          |          |      |          |          |          |          |          |      |          |          |          |          |          |      |          |          |          |          |          |     |          |          |          |          |          |       |          |          |          |          |          |       |          |          |          |          |          |  |   |   |   |   |    |      |          |  |  |  |  |      |          |          |  |  |  |      |          |          |          |  |  |     |          |          |          |          |  |       |          |          |          |          |          |       |          |          |          |          |          |
| 3 B                                                                                                                | 2.857203                                                                                                                                                                                                                                                                                                                                                                                                                                                                                                                                                                                                                                                                                                                                                                                                                                                                                                                                                                                                                                                                                                                                                                                                                                                                                                                                                                                                                                                                                                                                                                                                                                                                                                                                                                                                                                                                                                                                                  | 1.762940 | 0.000000 |          |          |   |   |     |          |  |  |  |  |     |          |          |  |  |  |      |          |          |          |  |  |     |          |          |          |          |  |     |          |          |          |          |          |      |          |          |          |          |          |      |          |          |          |          |          |      |          |          |          |          |          |     |          |          |          |          |          |       |          |          |          |          |          |       |          |          |          |          |          |  |   |   |   |   |    |      |          |  |  |  |  |      |          |          |  |  |  |      |          |          |          |  |  |     |          |          |          |          |  |       |          |          |          |          |          |       |          |          |          |          |          |
| 4 B                                                                                                                | 1.867583                                                                                                                                                                                                                                                                                                                                                                                                                                                                                                                                                                                                                                                                                                                                                                                                                                                                                                                                                                                                                                                                                                                                                                                                                                                                                                                                                                                                                                                                                                                                                                                                                                                                                                                                                                                                                                                                                                                                                  | 2.892458 | 1.769868 | 0.000000 |          |   |   |     |          |  |  |  |  |     |          |          |  |  |  |      |          |          |          |  |  |     |          |          |          |          |  |     |          |          |          |          |          |      |          |          |          |          |          |      |          |          |          |          |          |      |          |          |          |          |          |     |          |          |          |          |          |       |          |          |          |          |          |       |          |          |          |          |          |  |   |   |   |   |    |      |          |  |  |  |  |      |          |          |  |  |  |      |          |          |          |  |  |     |          |          |          |          |  |       |          |          |          |          |          |       |          |          |          |          |          |
| 5 B                                                                                                                | 1.817943                                                                                                                                                                                                                                                                                                                                                                                                                                                                                                                                                                                                                                                                                                                                                                                                                                                                                                                                                                                                                                                                                                                                                                                                                                                                                                                                                                                                                                                                                                                                                                                                                                                                                                                                                                                                                                                                                                                                                  | 2.744420 | 3.337910 | 3.068986 | 0.000000 |   |   |     |          |  |  |  |  |     |          |          |  |  |  |      |          |          |          |  |  |     |          |          |          |          |  |     |          |          |          |          |          |      |          |          |          |          |          |      |          |          |          |          |          |      |          |          |          |          |          |     |          |          |          |          |          |       |          |          |          |          |          |       |          |          |          |          |          |  |   |   |   |   |    |      |          |  |  |  |  |      |          |          |  |  |  |      |          |          |          |  |  |     |          |          |          |          |  |       |          |          |          |          |          |       |          |          |          |          |          |
| 6 B                                                                                                                | 2.904898                                                                                                                                                                                                                                                                                                                                                                                                                                                                                                                                                                                                                                                                                                                                                                                                                                                                                                                                                                                                                                                                                                                                                                                                                                                                                                                                                                                                                                                                                                                                                                                                                                                                                                                                                                                                                                                                                                                                                  | 1.759330 | 3.101254 | 3.721781 | 1.747757 |   |   |     |          |  |  |  |  |     |          |          |  |  |  |      |          |          |          |  |  |     |          |          |          |          |  |     |          |          |          |          |          |      |          |          |          |          |          |      |          |          |          |          |          |      |          |          |          |          |          |     |          |          |          |          |          |       |          |          |          |          |          |       |          |          |          |          |          |  |   |   |   |   |    |      |          |  |  |  |  |      |          |          |  |  |  |      |          |          |          |  |  |     |          |          |          |          |  |       |          |          |          |          |          |       |          |          |          |          |          |
| 7 Os                                                                                                               | 3.272226                                                                                                                                                                                                                                                                                                                                                                                                                                                                                                                                                                                                                                                                                                                                                                                                                                                                                                                                                                                                                                                                                                                                                                                                                                                                                                                                                                                                                                                                                                                                                                                                                                                                                                                                                                                                                                                                                                                                                  | 2.334772 | 2.365294 | 3.117160 | 2.378480 |   |   |     |          |  |  |  |  |     |          |          |  |  |  |      |          |          |          |  |  |     |          |          |          |          |  |     |          |          |          |          |          |      |          |          |          |          |          |      |          |          |          |          |          |      |          |          |          |          |          |     |          |          |          |          |          |       |          |          |          |          |          |       |          |          |          |          |          |  |   |   |   |   |    |      |          |  |  |  |  |      |          |          |  |  |  |      |          |          |          |  |  |     |          |          |          |          |  |       |          |          |          |          |          |       |          |          |          |          |          |
| 8 Os                                                                                                               | 2.276633                                                                                                                                                                                                                                                                                                                                                                                                                                                                                                                                                                                                                                                                                                                                                                                                                                                                                                                                                                                                                                                                                                                                                                                                                                                                                                                                                                                                                                                                                                                                                                                                                                                                                                                                                                                                                                                                                                                                                  | 3.759787 | 3.210173 | 2.328677 | 2.175148 |   |   |     |          |  |  |  |  |     |          |          |  |  |  |      |          |          |          |  |  |     |          |          |          |          |  |     |          |          |          |          |          |      |          |          |          |          |          |      |          |          |          |          |          |      |          |          |          |          |          |     |          |          |          |          |          |       |          |          |          |          |          |       |          |          |          |          |          |  |   |   |   |   |    |      |          |  |  |  |  |      |          |          |  |  |  |      |          |          |          |  |  |     |          |          |          |          |  |       |          |          |          |          |          |       |          |          |          |          |          |
| 9 B                                                                                                                | 3.105007                                                                                                                                                                                                                                                                                                                                                                                                                                                                                                                                                                                                                                                                                                                                                                                                                                                                                                                                                                                                                                                                                                                                                                                                                                                                                                                                                                                                                                                                                                                                                                                                                                                                                                                                                                                                                                                                                                                                                  | 3.141683 | 1.779375 | 1.808007 | 3.356191 |   |   |     |          |  |  |  |  |     |          |          |  |  |  |      |          |          |          |  |  |     |          |          |          |          |  |     |          |          |          |          |          |      |          |          |          |          |          |      |          |          |          |          |          |      |          |          |          |          |          |     |          |          |          |          |          |       |          |          |          |          |          |       |          |          |          |          |          |  |   |   |   |   |    |      |          |  |  |  |  |      |          |          |  |  |  |      |          |          |          |  |  |     |          |          |          |          |  |       |          |          |          |          |          |       |          |          |          |          |          |
| 10 B                                                                                                               | 1.777040                                                                                                                                                                                                                                                                                                                                                                                                                                                                                                                                                                                                                                                                                                                                                                                                                                                                                                                                                                                                                                                                                                                                                                                                                                                                                                                                                                                                                                                                                                                                                                                                                                                                                                                                                                                                                                                                                                                                                  | 1.792209 | 1.793651 | 1.753163 | 2.882032 |   |   |     |          |  |  |  |  |     |          |          |  |  |  |      |          |          |          |  |  |     |          |          |          |          |  |     |          |          |          |          |          |      |          |          |          |          |          |      |          |          |          |          |          |      |          |          |          |          |          |     |          |          |          |          |          |       |          |          |          |          |          |       |          |          |          |          |          |  |   |   |   |   |    |      |          |  |  |  |  |      |          |          |  |  |  |      |          |          |          |  |  |     |          |          |          |          |  |       |          |          |          |          |          |       |          |          |          |          |          |
| 11 B                                                                                                               | 1.796469                                                                                                                                                                                                                                                                                                                                                                                                                                                                                                                                                                                                                                                                                                                                                                                                                                                                                                                                                                                                                                                                                                                                                                                                                                                                                                                                                                                                                                                                                                                                                                                                                                                                                                                                                                                                                                                                                                                                                  | 1.804560 | 2.936698 | 3.007016 | 1.856744 |   |   |     |          |  |  |  |  |     |          |          |  |  |  |      |          |          |          |  |  |     |          |          |          |          |  |     |          |          |          |          |          |      |          |          |          |          |          |      |          |          |          |          |          |      |          |          |          |          |          |     |          |          |          |          |          |       |          |          |          |          |          |       |          |          |          |          |          |  |   |   |   |   |    |      |          |  |  |  |  |      |          |          |  |  |  |      |          |          |          |  |  |     |          |          |          |          |  |       |          |          |          |          |          |       |          |          |          |          |          |
|                                                                                                                    | 6                                                                                                                                                                                                                                                                                                                                                                                                                                                                                                                                                                                                                                                                                                                                                                                                                                                                                                                                                                                                                                                                                                                                                                                                                                                                                                                                                                                                                                                                                                                                                                                                                                                                                                                                                                                                                                                                                                                                                         | 7        | 8        | 9        | 10       |   |   |     |          |  |  |  |  |     |          |          |  |  |  |      |          |          |          |  |  |     |          |          |          |          |  |     |          |          |          |          |          |      |          |          |          |          |          |      |          |          |          |          |          |      |          |          |          |          |          |     |          |          |          |          |          |       |          |          |          |          |          |       |          |          |          |          |          |  |   |   |   |   |    |      |          |  |  |  |  |      |          |          |  |  |  |      |          |          |          |  |  |     |          |          |          |          |  |       |          |          |          |          |          |       |          |          |          |          |          |
| 6 B                                                                                                                | 0.000000                                                                                                                                                                                                                                                                                                                                                                                                                                                                                                                                                                                                                                                                                                                                                                                                                                                                                                                                                                                                                                                                                                                                                                                                                                                                                                                                                                                                                                                                                                                                                                                                                                                                                                                                                                                                                                                                                                                                                  |          |          |          |          |   |   |     |          |  |  |  |  |     |          |          |  |  |  |      |          |          |          |  |  |     |          |          |          |          |  |     |          |          |          |          |          |      |          |          |          |          |          |      |          |          |          |          |          |      |          |          |          |          |          |     |          |          |          |          |          |       |          |          |          |          |          |       |          |          |          |          |          |  |   |   |   |   |    |      |          |  |  |  |  |      |          |          |  |  |  |      |          |          |          |  |  |     |          |          |          |          |  |       |          |          |          |          |          |       |          |          |          |          |          |
| 7 Os                                                                                                               | 2.099615                                                                                                                                                                                                                                                                                                                                                                                                                                                                                                                                                                                                                                                                                                                                                                                                                                                                                                                                                                                                                                                                                                                                                                                                                                                                                                                                                                                                                                                                                                                                                                                                                                                                                                                                                                                                                                                                                                                                                  | 0.000000 |          |          |          |   |   |     |          |  |  |  |  |     |          |          |  |  |  |      |          |          |          |  |  |     |          |          |          |          |  |     |          |          |          |          |          |      |          |          |          |          |          |      |          |          |          |          |          |      |          |          |          |          |          |     |          |          |          |          |          |       |          |          |          |          |          |       |          |          |          |          |          |  |   |   |   |   |    |      |          |  |  |  |  |      |          |          |  |  |  |      |          |          |          |  |  |     |          |          |          |          |  |       |          |          |          |          |          |       |          |          |          |          |          |
| 8 Os                                                                                                               | 3.493736                                                                                                                                                                                                                                                                                                                                                                                                                                                                                                                                                                                                                                                                                                                                                                                                                                                                                                                                                                                                                                                                                                                                                                                                                                                                                                                                                                                                                                                                                                                                                                                                                                                                                                                                                                                                                                                                                                                                                  | 2.558949 | 0.000000 |          |          |   |   |     |          |  |  |  |  |     |          |          |  |  |  |      |          |          |          |  |  |     |          |          |          |          |  |     |          |          |          |          |          |      |          |          |          |          |          |      |          |          |          |          |          |      |          |          |          |          |          |     |          |          |          |          |          |       |          |          |          |          |          |       |          |          |          |          |          |  |   |   |   |   |    |      |          |  |  |  |  |      |          |          |  |  |  |      |          |          |          |  |  |     |          |          |          |          |  |       |          |          |          |          |          |       |          |          |          |          |          |
| 9 B                                                                                                                | 3.753353                                                                                                                                                                                                                                                                                                                                                                                                                                                                                                                                                                                                                                                                                                                                                                                                                                                                                                                                                                                                                                                                                                                                                                                                                                                                                                                                                                                                                                                                                                                                                                                                                                                                                                                                                                                                                                                                                                                                                  | 2.168917 | 2.141469 | 0.000000 |          |   |   |     |          |  |  |  |  |     |          |          |  |  |  |      |          |          |          |  |  |     |          |          |          |          |  |     |          |          |          |          |          |      |          |          |          |          |          |      |          |          |          |          |          |      |          |          |          |          |          |     |          |          |          |          |          |       |          |          |          |          |          |       |          |          |          |          |          |  |   |   |   |   |    |      |          |  |  |  |  |      |          |          |  |  |  |      |          |          |          |  |  |     |          |          |          |          |  |       |          |          |          |          |          |       |          |          |          |          |          |
| 10 B                                                                                                               | 2.923409                                                                                                                                                                                                                                                                                                                                                                                                                                                                                                                                                                                                                                                                                                                                                                                                                                                                                                                                                                                                                                                                                                                                                                                                                                                                                                                                                                                                                                                                                                                                                                                                                                                                                                                                                                                                                                                                                                                                                  | 3.290150 | 3.400270 | 3.016202 | 0.000000 |   |   |     |          |  |  |  |  |     |          |          |  |  |  |      |          |          |          |  |  |     |          |          |          |          |  |     |          |          |          |          |          |      |          |          |          |          |          |      |          |          |          |          |          |      |          |          |          |          |          |     |          |          |          |          |          |       |          |          |          |          |          |       |          |          |          |          |          |  |   |   |   |   |    |      |          |  |  |  |  |      |          |          |  |  |  |      |          |          |          |  |  |     |          |          |          |          |  |       |          |          |          |          |          |       |          |          |          |          |          |
| 11 B                                                                                                               | 1.720247                                                                                                                                                                                                                                                                                                                                                                                                                                                                                                                                                                                                                                                                                                                                                                                                                                                                                                                                                                                                                                                                                                                                                                                                                                                                                                                                                                                                                                                                                                                                                                                                                                                                                                                                                                                                                                                                                                                                                  | 3.127193 | 3.487170 | 3.865590 | 1.774823 |   |   |     |          |  |  |  |  |     |          |          |  |  |  |      |          |          |          |  |  |     |          |          |          |          |  |     |          |          |          |          |          |      |          |          |          |          |          |      |          |          |          |          |          |      |          |          |          |          |          |     |          |          |          |          |          |       |          |          |          |          |          |       |          |          |          |          |          |  |   |   |   |   |    |      |          |  |  |  |  |      |          |          |  |  |  |      |          |          |          |  |  |     |          |          |          |          |  |       |          |          |          |          |          |       |          |          |          |          |          |
|  <p>15. -797.74554496 +29.3</p> | <table border="1"> <thead> <tr> <th></th> <th>1</th> <th>2</th> <th>3</th> <th>4</th> <th>5</th> </tr> </thead> <tbody> <tr><td>1 B</td><td>0.000000</td><td></td><td></td><td></td><td></td></tr> <tr><td>2 B</td><td>3.339865</td><td>0.000000</td><td></td><td></td><td></td></tr> <tr><td>3 B</td><td>3.325961</td><td>1.777949</td><td>0.000000</td><td></td><td></td></tr> <tr><td>4 B</td><td>1.892341</td><td>3.830076</td><td>3.067414</td><td>0.000000</td><td></td></tr> <tr><td>5 B</td><td>1.822939</td><td>2.999224</td><td>2.883269</td><td>3.039223</td><td>0.000000</td></tr> <tr><td>6 B</td><td>3.035141</td><td>1.764864</td><td>1.898360</td><td>3.796490</td><td>1.771264</td></tr> <tr><td>7 B</td><td>2.889723</td><td>2.954112</td><td>1.829461</td><td>2.967774</td><td>1.804549</td></tr> <tr><td>8 B</td><td>1.807333</td><td>3.826216</td><td>2.947174</td><td>1.745968</td><td>1.835212</td></tr> <tr><td>9 B</td><td>2.790367</td><td>3.200241</td><td>1.752871</td><td>1.765484</td><td>2.854740</td></tr> <tr><td>10 Os</td><td>2.440750</td><td>2.309240</td><td>2.271472</td><td>2.066495</td><td>3.318613</td></tr> <tr><td>11 Os</td><td>2.154051</td><td>2.041912</td><td>3.150433</td><td>3.563943</td><td>2.220087</td></tr> <tr> <td></td> <td>6</td> <td>7</td> <td>8</td> <td>9</td> <td>10</td> </tr> <tr><td>6 B</td><td>0.000000</td><td></td><td></td><td></td><td></td></tr> <tr><td>7 B</td><td>1.744839</td><td>0.000000</td><td></td><td></td><td></td></tr> <tr><td>8 B</td><td>2.988560</td><td>1.819309</td><td>0.000000</td><td></td><td></td></tr> <tr><td>9 B</td><td>2.933869</td><td>1.763996</td><td>1.805608</td><td>0.000000</td><td></td></tr> <tr><td>10 Os</td><td>3.200801</td><td>3.273824</td><td>3.077291</td><td>2.324526</td><td>0.000000</td></tr> <tr><td>11 Os</td><td>2.266147</td><td>3.357940</td><td>3.423107</td><td>3.753853</td><td>2.630628</td></tr> </tbody> </table> |          | 1        | 2        | 3        | 4 | 5 | 1 B | 0.000000 |  |  |  |  | 2 B | 3.339865 | 0.000000 |  |  |  | 3 B  | 3.325961 | 1.777949 | 0.000000 |  |  | 4 B | 1.892341 | 3.830076 | 3.067414 | 0.000000 |  | 5 B | 1.822939 | 2.999224 | 2.883269 | 3.039223 | 0.000000 | 6 B  | 3.035141 | 1.764864 | 1.898360 | 3.796490 | 1.771264 | 7 B  | 2.889723 | 2.954112 | 1.829461 | 2.967774 | 1.804549 | 8 B  | 1.807333 | 3.826216 | 2.947174 | 1.745968 | 1.835212 | 9 B | 2.790367 | 3.200241 | 1.752871 | 1.765484 | 2.854740 | 10 Os | 2.440750 | 2.309240 | 2.271472 | 2.066495 | 3.318613 | 11 Os | 2.154051 | 2.041912 | 3.150433 | 3.563943 | 2.220087 |  | 6 | 7 | 8 | 9 | 10 | 6 B  | 0.000000 |  |  |  |  | 7 B  | 1.744839 | 0.000000 |  |  |  | 8 B  | 2.988560 | 1.819309 | 0.000000 |  |  | 9 B | 2.933869 | 1.763996 | 1.805608 | 0.000000 |  | 10 Os | 3.200801 | 3.273824 | 3.077291 | 2.324526 | 0.000000 | 11 Os | 2.266147 | 3.357940 | 3.423107 | 3.753853 | 2.630628 |
|                                                                                                                    | 1                                                                                                                                                                                                                                                                                                                                                                                                                                                                                                                                                                                                                                                                                                                                                                                                                                                                                                                                                                                                                                                                                                                                                                                                                                                                                                                                                                                                                                                                                                                                                                                                                                                                                                                                                                                                                                                                                                                                                         | 2        | 3        | 4        | 5        |   |   |     |          |  |  |  |  |     |          |          |  |  |  |      |          |          |          |  |  |     |          |          |          |          |  |     |          |          |          |          |          |      |          |          |          |          |          |      |          |          |          |          |          |      |          |          |          |          |          |     |          |          |          |          |          |       |          |          |          |          |          |       |          |          |          |          |          |  |   |   |   |   |    |      |          |  |  |  |  |      |          |          |  |  |  |      |          |          |          |  |  |     |          |          |          |          |  |       |          |          |          |          |          |       |          |          |          |          |          |
| 1 B                                                                                                                | 0.000000                                                                                                                                                                                                                                                                                                                                                                                                                                                                                                                                                                                                                                                                                                                                                                                                                                                                                                                                                                                                                                                                                                                                                                                                                                                                                                                                                                                                                                                                                                                                                                                                                                                                                                                                                                                                                                                                                                                                                  |          |          |          |          |   |   |     |          |  |  |  |  |     |          |          |  |  |  |      |          |          |          |  |  |     |          |          |          |          |  |     |          |          |          |          |          |      |          |          |          |          |          |      |          |          |          |          |          |      |          |          |          |          |          |     |          |          |          |          |          |       |          |          |          |          |          |       |          |          |          |          |          |  |   |   |   |   |    |      |          |  |  |  |  |      |          |          |  |  |  |      |          |          |          |  |  |     |          |          |          |          |  |       |          |          |          |          |          |       |          |          |          |          |          |
| 2 B                                                                                                                | 3.339865                                                                                                                                                                                                                                                                                                                                                                                                                                                                                                                                                                                                                                                                                                                                                                                                                                                                                                                                                                                                                                                                                                                                                                                                                                                                                                                                                                                                                                                                                                                                                                                                                                                                                                                                                                                                                                                                                                                                                  | 0.000000 |          |          |          |   |   |     |          |  |  |  |  |     |          |          |  |  |  |      |          |          |          |  |  |     |          |          |          |          |  |     |          |          |          |          |          |      |          |          |          |          |          |      |          |          |          |          |          |      |          |          |          |          |          |     |          |          |          |          |          |       |          |          |          |          |          |       |          |          |          |          |          |  |   |   |   |   |    |      |          |  |  |  |  |      |          |          |  |  |  |      |          |          |          |  |  |     |          |          |          |          |  |       |          |          |          |          |          |       |          |          |          |          |          |
| 3 B                                                                                                                | 3.325961                                                                                                                                                                                                                                                                                                                                                                                                                                                                                                                                                                                                                                                                                                                                                                                                                                                                                                                                                                                                                                                                                                                                                                                                                                                                                                                                                                                                                                                                                                                                                                                                                                                                                                                                                                                                                                                                                                                                                  | 1.777949 | 0.000000 |          |          |   |   |     |          |  |  |  |  |     |          |          |  |  |  |      |          |          |          |  |  |     |          |          |          |          |  |     |          |          |          |          |          |      |          |          |          |          |          |      |          |          |          |          |          |      |          |          |          |          |          |     |          |          |          |          |          |       |          |          |          |          |          |       |          |          |          |          |          |  |   |   |   |   |    |      |          |  |  |  |  |      |          |          |  |  |  |      |          |          |          |  |  |     |          |          |          |          |  |       |          |          |          |          |          |       |          |          |          |          |          |
| 4 B                                                                                                                | 1.892341                                                                                                                                                                                                                                                                                                                                                                                                                                                                                                                                                                                                                                                                                                                                                                                                                                                                                                                                                                                                                                                                                                                                                                                                                                                                                                                                                                                                                                                                                                                                                                                                                                                                                                                                                                                                                                                                                                                                                  | 3.830076 | 3.067414 | 0.000000 |          |   |   |     |          |  |  |  |  |     |          |          |  |  |  |      |          |          |          |  |  |     |          |          |          |          |  |     |          |          |          |          |          |      |          |          |          |          |          |      |          |          |          |          |          |      |          |          |          |          |          |     |          |          |          |          |          |       |          |          |          |          |          |       |          |          |          |          |          |  |   |   |   |   |    |      |          |  |  |  |  |      |          |          |  |  |  |      |          |          |          |  |  |     |          |          |          |          |  |       |          |          |          |          |          |       |          |          |          |          |          |
| 5 B                                                                                                                | 1.822939                                                                                                                                                                                                                                                                                                                                                                                                                                                                                                                                                                                                                                                                                                                                                                                                                                                                                                                                                                                                                                                                                                                                                                                                                                                                                                                                                                                                                                                                                                                                                                                                                                                                                                                                                                                                                                                                                                                                                  | 2.999224 | 2.883269 | 3.039223 | 0.000000 |   |   |     |          |  |  |  |  |     |          |          |  |  |  |      |          |          |          |  |  |     |          |          |          |          |  |     |          |          |          |          |          |      |          |          |          |          |          |      |          |          |          |          |          |      |          |          |          |          |          |     |          |          |          |          |          |       |          |          |          |          |          |       |          |          |          |          |          |  |   |   |   |   |    |      |          |  |  |  |  |      |          |          |  |  |  |      |          |          |          |  |  |     |          |          |          |          |  |       |          |          |          |          |          |       |          |          |          |          |          |
| 6 B                                                                                                                | 3.035141                                                                                                                                                                                                                                                                                                                                                                                                                                                                                                                                                                                                                                                                                                                                                                                                                                                                                                                                                                                                                                                                                                                                                                                                                                                                                                                                                                                                                                                                                                                                                                                                                                                                                                                                                                                                                                                                                                                                                  | 1.764864 | 1.898360 | 3.796490 | 1.771264 |   |   |     |          |  |  |  |  |     |          |          |  |  |  |      |          |          |          |  |  |     |          |          |          |          |  |     |          |          |          |          |          |      |          |          |          |          |          |      |          |          |          |          |          |      |          |          |          |          |          |     |          |          |          |          |          |       |          |          |          |          |          |       |          |          |          |          |          |  |   |   |   |   |    |      |          |  |  |  |  |      |          |          |  |  |  |      |          |          |          |  |  |     |          |          |          |          |  |       |          |          |          |          |          |       |          |          |          |          |          |
| 7 B                                                                                                                | 2.889723                                                                                                                                                                                                                                                                                                                                                                                                                                                                                                                                                                                                                                                                                                                                                                                                                                                                                                                                                                                                                                                                                                                                                                                                                                                                                                                                                                                                                                                                                                                                                                                                                                                                                                                                                                                                                                                                                                                                                  | 2.954112 | 1.829461 | 2.967774 | 1.804549 |   |   |     |          |  |  |  |  |     |          |          |  |  |  |      |          |          |          |  |  |     |          |          |          |          |  |     |          |          |          |          |          |      |          |          |          |          |          |      |          |          |          |          |          |      |          |          |          |          |          |     |          |          |          |          |          |       |          |          |          |          |          |       |          |          |          |          |          |  |   |   |   |   |    |      |          |  |  |  |  |      |          |          |  |  |  |      |          |          |          |  |  |     |          |          |          |          |  |       |          |          |          |          |          |       |          |          |          |          |          |
| 8 B                                                                                                                | 1.807333                                                                                                                                                                                                                                                                                                                                                                                                                                                                                                                                                                                                                                                                                                                                                                                                                                                                                                                                                                                                                                                                                                                                                                                                                                                                                                                                                                                                                                                                                                                                                                                                                                                                                                                                                                                                                                                                                                                                                  | 3.826216 | 2.947174 | 1.745968 | 1.835212 |   |   |     |          |  |  |  |  |     |          |          |  |  |  |      |          |          |          |  |  |     |          |          |          |          |  |     |          |          |          |          |          |      |          |          |          |          |          |      |          |          |          |          |          |      |          |          |          |          |          |     |          |          |          |          |          |       |          |          |          |          |          |       |          |          |          |          |          |  |   |   |   |   |    |      |          |  |  |  |  |      |          |          |  |  |  |      |          |          |          |  |  |     |          |          |          |          |  |       |          |          |          |          |          |       |          |          |          |          |          |
| 9 B                                                                                                                | 2.790367                                                                                                                                                                                                                                                                                                                                                                                                                                                                                                                                                                                                                                                                                                                                                                                                                                                                                                                                                                                                                                                                                                                                                                                                                                                                                                                                                                                                                                                                                                                                                                                                                                                                                                                                                                                                                                                                                                                                                  | 3.200241 | 1.752871 | 1.765484 | 2.854740 |   |   |     |          |  |  |  |  |     |          |          |  |  |  |      |          |          |          |  |  |     |          |          |          |          |  |     |          |          |          |          |          |      |          |          |          |          |          |      |          |          |          |          |          |      |          |          |          |          |          |     |          |          |          |          |          |       |          |          |          |          |          |       |          |          |          |          |          |  |   |   |   |   |    |      |          |  |  |  |  |      |          |          |  |  |  |      |          |          |          |  |  |     |          |          |          |          |  |       |          |          |          |          |          |       |          |          |          |          |          |
| 10 Os                                                                                                              | 2.440750                                                                                                                                                                                                                                                                                                                                                                                                                                                                                                                                                                                                                                                                                                                                                                                                                                                                                                                                                                                                                                                                                                                                                                                                                                                                                                                                                                                                                                                                                                                                                                                                                                                                                                                                                                                                                                                                                                                                                  | 2.309240 | 2.271472 | 2.066495 | 3.318613 |   |   |     |          |  |  |  |  |     |          |          |  |  |  |      |          |          |          |  |  |     |          |          |          |          |  |     |          |          |          |          |          |      |          |          |          |          |          |      |          |          |          |          |          |      |          |          |          |          |          |     |          |          |          |          |          |       |          |          |          |          |          |       |          |          |          |          |          |  |   |   |   |   |    |      |          |  |  |  |  |      |          |          |  |  |  |      |          |          |          |  |  |     |          |          |          |          |  |       |          |          |          |          |          |       |          |          |          |          |          |
| 11 Os                                                                                                              | 2.154051                                                                                                                                                                                                                                                                                                                                                                                                                                                                                                                                                                                                                                                                                                                                                                                                                                                                                                                                                                                                                                                                                                                                                                                                                                                                                                                                                                                                                                                                                                                                                                                                                                                                                                                                                                                                                                                                                                                                                  | 2.041912 | 3.150433 | 3.563943 | 2.220087 |   |   |     |          |  |  |  |  |     |          |          |  |  |  |      |          |          |          |  |  |     |          |          |          |          |  |     |          |          |          |          |          |      |          |          |          |          |          |      |          |          |          |          |          |      |          |          |          |          |          |     |          |          |          |          |          |       |          |          |          |          |          |       |          |          |          |          |          |  |   |   |   |   |    |      |          |  |  |  |  |      |          |          |  |  |  |      |          |          |          |  |  |     |          |          |          |          |  |       |          |          |          |          |          |       |          |          |          |          |          |
|                                                                                                                    | 6                                                                                                                                                                                                                                                                                                                                                                                                                                                                                                                                                                                                                                                                                                                                                                                                                                                                                                                                                                                                                                                                                                                                                                                                                                                                                                                                                                                                                                                                                                                                                                                                                                                                                                                                                                                                                                                                                                                                                         | 7        | 8        | 9        | 10       |   |   |     |          |  |  |  |  |     |          |          |  |  |  |      |          |          |          |  |  |     |          |          |          |          |  |     |          |          |          |          |          |      |          |          |          |          |          |      |          |          |          |          |          |      |          |          |          |          |          |     |          |          |          |          |          |       |          |          |          |          |          |       |          |          |          |          |          |  |   |   |   |   |    |      |          |  |  |  |  |      |          |          |  |  |  |      |          |          |          |  |  |     |          |          |          |          |  |       |          |          |          |          |          |       |          |          |          |          |          |
| 6 B                                                                                                                | 0.000000                                                                                                                                                                                                                                                                                                                                                                                                                                                                                                                                                                                                                                                                                                                                                                                                                                                                                                                                                                                                                                                                                                                                                                                                                                                                                                                                                                                                                                                                                                                                                                                                                                                                                                                                                                                                                                                                                                                                                  |          |          |          |          |   |   |     |          |  |  |  |  |     |          |          |  |  |  |      |          |          |          |  |  |     |          |          |          |          |  |     |          |          |          |          |          |      |          |          |          |          |          |      |          |          |          |          |          |      |          |          |          |          |          |     |          |          |          |          |          |       |          |          |          |          |          |       |          |          |          |          |          |  |   |   |   |   |    |      |          |  |  |  |  |      |          |          |  |  |  |      |          |          |          |  |  |     |          |          |          |          |  |       |          |          |          |          |          |       |          |          |          |          |          |
| 7 B                                                                                                                | 1.744839                                                                                                                                                                                                                                                                                                                                                                                                                                                                                                                                                                                                                                                                                                                                                                                                                                                                                                                                                                                                                                                                                                                                                                                                                                                                                                                                                                                                                                                                                                                                                                                                                                                                                                                                                                                                                                                                                                                                                  | 0.000000 |          |          |          |   |   |     |          |  |  |  |  |     |          |          |  |  |  |      |          |          |          |  |  |     |          |          |          |          |  |     |          |          |          |          |          |      |          |          |          |          |          |      |          |          |          |          |          |      |          |          |          |          |          |     |          |          |          |          |          |       |          |          |          |          |          |       |          |          |          |          |          |  |   |   |   |   |    |      |          |  |  |  |  |      |          |          |  |  |  |      |          |          |          |  |  |     |          |          |          |          |  |       |          |          |          |          |          |       |          |          |          |          |          |
| 8 B                                                                                                                | 2.988560                                                                                                                                                                                                                                                                                                                                                                                                                                                                                                                                                                                                                                                                                                                                                                                                                                                                                                                                                                                                                                                                                                                                                                                                                                                                                                                                                                                                                                                                                                                                                                                                                                                                                                                                                                                                                                                                                                                                                  | 1.819309 | 0.000000 |          |          |   |   |     |          |  |  |  |  |     |          |          |  |  |  |      |          |          |          |  |  |     |          |          |          |          |  |     |          |          |          |          |          |      |          |          |          |          |          |      |          |          |          |          |          |      |          |          |          |          |          |     |          |          |          |          |          |       |          |          |          |          |          |       |          |          |          |          |          |  |   |   |   |   |    |      |          |  |  |  |  |      |          |          |  |  |  |      |          |          |          |  |  |     |          |          |          |          |  |       |          |          |          |          |          |       |          |          |          |          |          |
| 9 B                                                                                                                | 2.933869                                                                                                                                                                                                                                                                                                                                                                                                                                                                                                                                                                                                                                                                                                                                                                                                                                                                                                                                                                                                                                                                                                                                                                                                                                                                                                                                                                                                                                                                                                                                                                                                                                                                                                                                                                                                                                                                                                                                                  | 1.763996 | 1.805608 | 0.000000 |          |   |   |     |          |  |  |  |  |     |          |          |  |  |  |      |          |          |          |  |  |     |          |          |          |          |  |     |          |          |          |          |          |      |          |          |          |          |          |      |          |          |          |          |          |      |          |          |          |          |          |     |          |          |          |          |          |       |          |          |          |          |          |       |          |          |          |          |          |  |   |   |   |   |    |      |          |  |  |  |  |      |          |          |  |  |  |      |          |          |          |  |  |     |          |          |          |          |  |       |          |          |          |          |          |       |          |          |          |          |          |
| 10 Os                                                                                                              | 3.200801                                                                                                                                                                                                                                                                                                                                                                                                                                                                                                                                                                                                                                                                                                                                                                                                                                                                                                                                                                                                                                                                                                                                                                                                                                                                                                                                                                                                                                                                                                                                                                                                                                                                                                                                                                                                                                                                                                                                                  | 3.273824 | 3.077291 | 2.324526 | 0.000000 |   |   |     |          |  |  |  |  |     |          |          |  |  |  |      |          |          |          |  |  |     |          |          |          |          |  |     |          |          |          |          |          |      |          |          |          |          |          |      |          |          |          |          |          |      |          |          |          |          |          |     |          |          |          |          |          |       |          |          |          |          |          |       |          |          |          |          |          |  |   |   |   |   |    |      |          |  |  |  |  |      |          |          |  |  |  |      |          |          |          |  |  |     |          |          |          |          |  |       |          |          |          |          |          |       |          |          |          |          |          |
| 11 Os                                                                                                              | 2.266147                                                                                                                                                                                                                                                                                                                                                                                                                                                                                                                                                                                                                                                                                                                                                                                                                                                                                                                                                                                                                                                                                                                                                                                                                                                                                                                                                                                                                                                                                                                                                                                                                                                                                                                                                                                                                                                                                                                                                  | 3.357940 | 3.423107 | 3.753853 | 2.630628 |   |   |     |          |  |  |  |  |     |          |          |  |  |  |      |          |          |          |  |  |     |          |          |          |          |  |     |          |          |          |          |          |      |          |          |          |          |          |      |          |          |          |          |          |      |          |          |          |          |          |     |          |          |          |          |          |       |          |          |          |          |          |       |          |          |          |          |          |  |   |   |   |   |    |      |          |  |  |  |  |      |          |          |  |  |  |      |          |          |          |  |  |     |          |          |          |          |  |       |          |          |          |          |          |       |          |          |          |          |          |



| 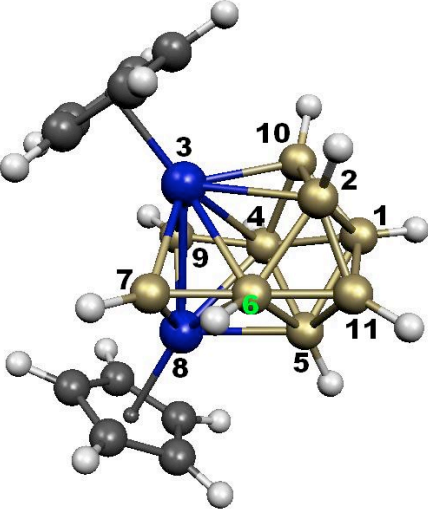 <p>16. -797.74485961 +29.7</p>   | <table border="1"> <thead> <tr> <th></th> <th>1</th> <th>2</th> <th>3</th> <th>4</th> <th>5</th> </tr> </thead> <tbody> <tr><td>1 B</td><td>0.000000</td><td></td><td></td><td></td><td></td></tr> <tr><td>2 B</td><td>1.800573</td><td>0.000000</td><td></td><td></td><td></td></tr> <tr><td>3 Os</td><td>3.248012</td><td>2.455393</td><td>0.000000</td><td></td><td></td></tr> <tr><td>4 B</td><td>1.898236</td><td>2.663128</td><td>2.310998</td><td>0.000000</td><td></td></tr> <tr><td>5 B</td><td>1.931531</td><td>2.714113</td><td>3.378673</td><td>1.921415</td><td>0.000000</td></tr> <tr><td>6 B</td><td>2.596840</td><td>1.926191</td><td>2.381896</td><td>2.531026</td><td>1.860083</td></tr> <tr><td>7 B</td><td>4.047978</td><td>3.183600</td><td>2.200693</td><td>3.290250</td><td>3.156362</td></tr> <tr><td>8 Os</td><td>3.612524</td><td>3.762410</td><td>2.761907</td><td>2.251495</td><td>2.235765</td></tr> <tr><td>9 B</td><td>3.593060</td><td>3.874450</td><td>2.188006</td><td>1.731791</td><td>3.247717</td></tr> <tr><td>10 B</td><td>1.703392</td><td>1.746053</td><td>2.142692</td><td>1.800408</td><td>3.005786</td></tr> <tr><td>11 B</td><td>1.727462</td><td>1.689283</td><td>3.502294</td><td>2.841157</td><td>1.700259</td></tr> <tr> <td></td> <td>6</td> <td>7</td> <td>8</td> <td>9</td> <td>10</td> </tr> <tr><td>6 B</td><td>0.000000</td><td></td><td></td><td></td><td></td></tr> <tr><td>7 B</td><td>1.679262</td><td>0.000000</td><td></td><td></td><td></td></tr> <tr><td>8 Os</td><td>2.294217</td><td>2.119453</td><td>0.000000</td><td></td><td></td></tr> <tr><td>9 B</td><td>3.362759</td><td>3.223641</td><td>2.080906</td><td>0.000000</td><td></td></tr> <tr><td>10 B</td><td>2.894953</td><td>3.797918</td><td>3.696722</td><td>2.903346</td><td>0.000000</td></tr> <tr><td>11 B</td><td>1.675887</td><td>3.353582</td><td>3.471859</td><td>4.291744</td><td>2.864433</td></tr> </tbody> </table> |          | 1        | 2        | 3        | 4 | 5 | 1 B  | 0.000000 |  |  |  |  | 2 B  | 1.800573 | 0.000000 |  |  |  | 3 Os | 3.248012 | 2.455393 | 0.000000 |  |  | 4 B | 1.898236 | 2.663128 | 2.310998 | 0.000000 |  | 5 B | 1.931531 | 2.714113 | 3.378673 | 1.921415 | 0.000000 | 6 B | 2.596840 | 1.926191 | 2.381896 | 2.531026 | 1.860083 | 7 B  | 4.047978 | 3.183600 | 2.200693 | 3.290250 | 3.156362 | 8 Os | 3.612524 | 3.762410 | 2.761907 | 2.251495 | 2.235765 | 9 B | 3.593060 | 3.874450 | 2.188006 | 1.731791 | 3.247717 | 10 B | 1.703392 | 1.746053 | 2.142692 | 1.800408 | 3.005786 | 11 B | 1.727462 | 1.689283 | 3.502294 | 2.841157 | 1.700259 |  | 6 | 7 | 8 | 9 | 10 | 6 B | 0.000000 |  |  |  |  | 7 B  | 1.679262 | 0.000000 |  |  |  | 8 Os | 2.294217 | 2.119453 | 0.000000 |  |  | 9 B | 3.362759 | 3.223641 | 2.080906 | 0.000000 |  | 10 B | 2.894953 | 3.797918 | 3.696722 | 2.903346 | 0.000000 | 11 B | 1.675887 | 3.353582 | 3.471859 | 4.291744 | 2.864433 |
|--------------------------------------------------------------------------------------------------------------------|----------------------------------------------------------------------------------------------------------------------------------------------------------------------------------------------------------------------------------------------------------------------------------------------------------------------------------------------------------------------------------------------------------------------------------------------------------------------------------------------------------------------------------------------------------------------------------------------------------------------------------------------------------------------------------------------------------------------------------------------------------------------------------------------------------------------------------------------------------------------------------------------------------------------------------------------------------------------------------------------------------------------------------------------------------------------------------------------------------------------------------------------------------------------------------------------------------------------------------------------------------------------------------------------------------------------------------------------------------------------------------------------------------------------------------------------------------------------------------------------------------------------------------------------------------------------------------------------------------------------------------------------------------------------------------------------------------------------------------------------------------------------------------------------------------------------------------------------------------------------------------------------------------------------------------------------------------|----------|----------|----------|----------|---|---|------|----------|--|--|--|--|------|----------|----------|--|--|--|------|----------|----------|----------|--|--|-----|----------|----------|----------|----------|--|-----|----------|----------|----------|----------|----------|-----|----------|----------|----------|----------|----------|------|----------|----------|----------|----------|----------|------|----------|----------|----------|----------|----------|-----|----------|----------|----------|----------|----------|------|----------|----------|----------|----------|----------|------|----------|----------|----------|----------|----------|--|---|---|---|---|----|-----|----------|--|--|--|--|------|----------|----------|--|--|--|------|----------|----------|----------|--|--|-----|----------|----------|----------|----------|--|------|----------|----------|----------|----------|----------|------|----------|----------|----------|----------|----------|
|                                                                                                                    | 1                                                                                                                                                                                                                                                                                                                                                                                                                                                                                                                                                                                                                                                                                                                                                                                                                                                                                                                                                                                                                                                                                                                                                                                                                                                                                                                                                                                                                                                                                                                                                                                                                                                                                                                                                                                                                                                                                                                                                        | 2        | 3        | 4        | 5        |   |   |      |          |  |  |  |  |      |          |          |  |  |  |      |          |          |          |  |  |     |          |          |          |          |  |     |          |          |          |          |          |     |          |          |          |          |          |      |          |          |          |          |          |      |          |          |          |          |          |     |          |          |          |          |          |      |          |          |          |          |          |      |          |          |          |          |          |  |   |   |   |   |    |     |          |  |  |  |  |      |          |          |  |  |  |      |          |          |          |  |  |     |          |          |          |          |  |      |          |          |          |          |          |      |          |          |          |          |          |
| 1 B                                                                                                                | 0.000000                                                                                                                                                                                                                                                                                                                                                                                                                                                                                                                                                                                                                                                                                                                                                                                                                                                                                                                                                                                                                                                                                                                                                                                                                                                                                                                                                                                                                                                                                                                                                                                                                                                                                                                                                                                                                                                                                                                                                 |          |          |          |          |   |   |      |          |  |  |  |  |      |          |          |  |  |  |      |          |          |          |  |  |     |          |          |          |          |  |     |          |          |          |          |          |     |          |          |          |          |          |      |          |          |          |          |          |      |          |          |          |          |          |     |          |          |          |          |          |      |          |          |          |          |          |      |          |          |          |          |          |  |   |   |   |   |    |     |          |  |  |  |  |      |          |          |  |  |  |      |          |          |          |  |  |     |          |          |          |          |  |      |          |          |          |          |          |      |          |          |          |          |          |
| 2 B                                                                                                                | 1.800573                                                                                                                                                                                                                                                                                                                                                                                                                                                                                                                                                                                                                                                                                                                                                                                                                                                                                                                                                                                                                                                                                                                                                                                                                                                                                                                                                                                                                                                                                                                                                                                                                                                                                                                                                                                                                                                                                                                                                 | 0.000000 |          |          |          |   |   |      |          |  |  |  |  |      |          |          |  |  |  |      |          |          |          |  |  |     |          |          |          |          |  |     |          |          |          |          |          |     |          |          |          |          |          |      |          |          |          |          |          |      |          |          |          |          |          |     |          |          |          |          |          |      |          |          |          |          |          |      |          |          |          |          |          |  |   |   |   |   |    |     |          |  |  |  |  |      |          |          |  |  |  |      |          |          |          |  |  |     |          |          |          |          |  |      |          |          |          |          |          |      |          |          |          |          |          |
| 3 Os                                                                                                               | 3.248012                                                                                                                                                                                                                                                                                                                                                                                                                                                                                                                                                                                                                                                                                                                                                                                                                                                                                                                                                                                                                                                                                                                                                                                                                                                                                                                                                                                                                                                                                                                                                                                                                                                                                                                                                                                                                                                                                                                                                 | 2.455393 | 0.000000 |          |          |   |   |      |          |  |  |  |  |      |          |          |  |  |  |      |          |          |          |  |  |     |          |          |          |          |  |     |          |          |          |          |          |     |          |          |          |          |          |      |          |          |          |          |          |      |          |          |          |          |          |     |          |          |          |          |          |      |          |          |          |          |          |      |          |          |          |          |          |  |   |   |   |   |    |     |          |  |  |  |  |      |          |          |  |  |  |      |          |          |          |  |  |     |          |          |          |          |  |      |          |          |          |          |          |      |          |          |          |          |          |
| 4 B                                                                                                                | 1.898236                                                                                                                                                                                                                                                                                                                                                                                                                                                                                                                                                                                                                                                                                                                                                                                                                                                                                                                                                                                                                                                                                                                                                                                                                                                                                                                                                                                                                                                                                                                                                                                                                                                                                                                                                                                                                                                                                                                                                 | 2.663128 | 2.310998 | 0.000000 |          |   |   |      |          |  |  |  |  |      |          |          |  |  |  |      |          |          |          |  |  |     |          |          |          |          |  |     |          |          |          |          |          |     |          |          |          |          |          |      |          |          |          |          |          |      |          |          |          |          |          |     |          |          |          |          |          |      |          |          |          |          |          |      |          |          |          |          |          |  |   |   |   |   |    |     |          |  |  |  |  |      |          |          |  |  |  |      |          |          |          |  |  |     |          |          |          |          |  |      |          |          |          |          |          |      |          |          |          |          |          |
| 5 B                                                                                                                | 1.931531                                                                                                                                                                                                                                                                                                                                                                                                                                                                                                                                                                                                                                                                                                                                                                                                                                                                                                                                                                                                                                                                                                                                                                                                                                                                                                                                                                                                                                                                                                                                                                                                                                                                                                                                                                                                                                                                                                                                                 | 2.714113 | 3.378673 | 1.921415 | 0.000000 |   |   |      |          |  |  |  |  |      |          |          |  |  |  |      |          |          |          |  |  |     |          |          |          |          |  |     |          |          |          |          |          |     |          |          |          |          |          |      |          |          |          |          |          |      |          |          |          |          |          |     |          |          |          |          |          |      |          |          |          |          |          |      |          |          |          |          |          |  |   |   |   |   |    |     |          |  |  |  |  |      |          |          |  |  |  |      |          |          |          |  |  |     |          |          |          |          |  |      |          |          |          |          |          |      |          |          |          |          |          |
| 6 B                                                                                                                | 2.596840                                                                                                                                                                                                                                                                                                                                                                                                                                                                                                                                                                                                                                                                                                                                                                                                                                                                                                                                                                                                                                                                                                                                                                                                                                                                                                                                                                                                                                                                                                                                                                                                                                                                                                                                                                                                                                                                                                                                                 | 1.926191 | 2.381896 | 2.531026 | 1.860083 |   |   |      |          |  |  |  |  |      |          |          |  |  |  |      |          |          |          |  |  |     |          |          |          |          |  |     |          |          |          |          |          |     |          |          |          |          |          |      |          |          |          |          |          |      |          |          |          |          |          |     |          |          |          |          |          |      |          |          |          |          |          |      |          |          |          |          |          |  |   |   |   |   |    |     |          |  |  |  |  |      |          |          |  |  |  |      |          |          |          |  |  |     |          |          |          |          |  |      |          |          |          |          |          |      |          |          |          |          |          |
| 7 B                                                                                                                | 4.047978                                                                                                                                                                                                                                                                                                                                                                                                                                                                                                                                                                                                                                                                                                                                                                                                                                                                                                                                                                                                                                                                                                                                                                                                                                                                                                                                                                                                                                                                                                                                                                                                                                                                                                                                                                                                                                                                                                                                                 | 3.183600 | 2.200693 | 3.290250 | 3.156362 |   |   |      |          |  |  |  |  |      |          |          |  |  |  |      |          |          |          |  |  |     |          |          |          |          |  |     |          |          |          |          |          |     |          |          |          |          |          |      |          |          |          |          |          |      |          |          |          |          |          |     |          |          |          |          |          |      |          |          |          |          |          |      |          |          |          |          |          |  |   |   |   |   |    |     |          |  |  |  |  |      |          |          |  |  |  |      |          |          |          |  |  |     |          |          |          |          |  |      |          |          |          |          |          |      |          |          |          |          |          |
| 8 Os                                                                                                               | 3.612524                                                                                                                                                                                                                                                                                                                                                                                                                                                                                                                                                                                                                                                                                                                                                                                                                                                                                                                                                                                                                                                                                                                                                                                                                                                                                                                                                                                                                                                                                                                                                                                                                                                                                                                                                                                                                                                                                                                                                 | 3.762410 | 2.761907 | 2.251495 | 2.235765 |   |   |      |          |  |  |  |  |      |          |          |  |  |  |      |          |          |          |  |  |     |          |          |          |          |  |     |          |          |          |          |          |     |          |          |          |          |          |      |          |          |          |          |          |      |          |          |          |          |          |     |          |          |          |          |          |      |          |          |          |          |          |      |          |          |          |          |          |  |   |   |   |   |    |     |          |  |  |  |  |      |          |          |  |  |  |      |          |          |          |  |  |     |          |          |          |          |  |      |          |          |          |          |          |      |          |          |          |          |          |
| 9 B                                                                                                                | 3.593060                                                                                                                                                                                                                                                                                                                                                                                                                                                                                                                                                                                                                                                                                                                                                                                                                                                                                                                                                                                                                                                                                                                                                                                                                                                                                                                                                                                                                                                                                                                                                                                                                                                                                                                                                                                                                                                                                                                                                 | 3.874450 | 2.188006 | 1.731791 | 3.247717 |   |   |      |          |  |  |  |  |      |          |          |  |  |  |      |          |          |          |  |  |     |          |          |          |          |  |     |          |          |          |          |          |     |          |          |          |          |          |      |          |          |          |          |          |      |          |          |          |          |          |     |          |          |          |          |          |      |          |          |          |          |          |      |          |          |          |          |          |  |   |   |   |   |    |     |          |  |  |  |  |      |          |          |  |  |  |      |          |          |          |  |  |     |          |          |          |          |  |      |          |          |          |          |          |      |          |          |          |          |          |
| 10 B                                                                                                               | 1.703392                                                                                                                                                                                                                                                                                                                                                                                                                                                                                                                                                                                                                                                                                                                                                                                                                                                                                                                                                                                                                                                                                                                                                                                                                                                                                                                                                                                                                                                                                                                                                                                                                                                                                                                                                                                                                                                                                                                                                 | 1.746053 | 2.142692 | 1.800408 | 3.005786 |   |   |      |          |  |  |  |  |      |          |          |  |  |  |      |          |          |          |  |  |     |          |          |          |          |  |     |          |          |          |          |          |     |          |          |          |          |          |      |          |          |          |          |          |      |          |          |          |          |          |     |          |          |          |          |          |      |          |          |          |          |          |      |          |          |          |          |          |  |   |   |   |   |    |     |          |  |  |  |  |      |          |          |  |  |  |      |          |          |          |  |  |     |          |          |          |          |  |      |          |          |          |          |          |      |          |          |          |          |          |
| 11 B                                                                                                               | 1.727462                                                                                                                                                                                                                                                                                                                                                                                                                                                                                                                                                                                                                                                                                                                                                                                                                                                                                                                                                                                                                                                                                                                                                                                                                                                                                                                                                                                                                                                                                                                                                                                                                                                                                                                                                                                                                                                                                                                                                 | 1.689283 | 3.502294 | 2.841157 | 1.700259 |   |   |      |          |  |  |  |  |      |          |          |  |  |  |      |          |          |          |  |  |     |          |          |          |          |  |     |          |          |          |          |          |     |          |          |          |          |          |      |          |          |          |          |          |      |          |          |          |          |          |     |          |          |          |          |          |      |          |          |          |          |          |      |          |          |          |          |          |  |   |   |   |   |    |     |          |  |  |  |  |      |          |          |  |  |  |      |          |          |          |  |  |     |          |          |          |          |  |      |          |          |          |          |          |      |          |          |          |          |          |
|                                                                                                                    | 6                                                                                                                                                                                                                                                                                                                                                                                                                                                                                                                                                                                                                                                                                                                                                                                                                                                                                                                                                                                                                                                                                                                                                                                                                                                                                                                                                                                                                                                                                                                                                                                                                                                                                                                                                                                                                                                                                                                                                        | 7        | 8        | 9        | 10       |   |   |      |          |  |  |  |  |      |          |          |  |  |  |      |          |          |          |  |  |     |          |          |          |          |  |     |          |          |          |          |          |     |          |          |          |          |          |      |          |          |          |          |          |      |          |          |          |          |          |     |          |          |          |          |          |      |          |          |          |          |          |      |          |          |          |          |          |  |   |   |   |   |    |     |          |  |  |  |  |      |          |          |  |  |  |      |          |          |          |  |  |     |          |          |          |          |  |      |          |          |          |          |          |      |          |          |          |          |          |
| 6 B                                                                                                                | 0.000000                                                                                                                                                                                                                                                                                                                                                                                                                                                                                                                                                                                                                                                                                                                                                                                                                                                                                                                                                                                                                                                                                                                                                                                                                                                                                                                                                                                                                                                                                                                                                                                                                                                                                                                                                                                                                                                                                                                                                 |          |          |          |          |   |   |      |          |  |  |  |  |      |          |          |  |  |  |      |          |          |          |  |  |     |          |          |          |          |  |     |          |          |          |          |          |     |          |          |          |          |          |      |          |          |          |          |          |      |          |          |          |          |          |     |          |          |          |          |          |      |          |          |          |          |          |      |          |          |          |          |          |  |   |   |   |   |    |     |          |  |  |  |  |      |          |          |  |  |  |      |          |          |          |  |  |     |          |          |          |          |  |      |          |          |          |          |          |      |          |          |          |          |          |
| 7 B                                                                                                                | 1.679262                                                                                                                                                                                                                                                                                                                                                                                                                                                                                                                                                                                                                                                                                                                                                                                                                                                                                                                                                                                                                                                                                                                                                                                                                                                                                                                                                                                                                                                                                                                                                                                                                                                                                                                                                                                                                                                                                                                                                 | 0.000000 |          |          |          |   |   |      |          |  |  |  |  |      |          |          |  |  |  |      |          |          |          |  |  |     |          |          |          |          |  |     |          |          |          |          |          |     |          |          |          |          |          |      |          |          |          |          |          |      |          |          |          |          |          |     |          |          |          |          |          |      |          |          |          |          |          |      |          |          |          |          |          |  |   |   |   |   |    |     |          |  |  |  |  |      |          |          |  |  |  |      |          |          |          |  |  |     |          |          |          |          |  |      |          |          |          |          |          |      |          |          |          |          |          |
| 8 Os                                                                                                               | 2.294217                                                                                                                                                                                                                                                                                                                                                                                                                                                                                                                                                                                                                                                                                                                                                                                                                                                                                                                                                                                                                                                                                                                                                                                                                                                                                                                                                                                                                                                                                                                                                                                                                                                                                                                                                                                                                                                                                                                                                 | 2.119453 | 0.000000 |          |          |   |   |      |          |  |  |  |  |      |          |          |  |  |  |      |          |          |          |  |  |     |          |          |          |          |  |     |          |          |          |          |          |     |          |          |          |          |          |      |          |          |          |          |          |      |          |          |          |          |          |     |          |          |          |          |          |      |          |          |          |          |          |      |          |          |          |          |          |  |   |   |   |   |    |     |          |  |  |  |  |      |          |          |  |  |  |      |          |          |          |  |  |     |          |          |          |          |  |      |          |          |          |          |          |      |          |          |          |          |          |
| 9 B                                                                                                                | 3.362759                                                                                                                                                                                                                                                                                                                                                                                                                                                                                                                                                                                                                                                                                                                                                                                                                                                                                                                                                                                                                                                                                                                                                                                                                                                                                                                                                                                                                                                                                                                                                                                                                                                                                                                                                                                                                                                                                                                                                 | 3.223641 | 2.080906 | 0.000000 |          |   |   |      |          |  |  |  |  |      |          |          |  |  |  |      |          |          |          |  |  |     |          |          |          |          |  |     |          |          |          |          |          |     |          |          |          |          |          |      |          |          |          |          |          |      |          |          |          |          |          |     |          |          |          |          |          |      |          |          |          |          |          |      |          |          |          |          |          |  |   |   |   |   |    |     |          |  |  |  |  |      |          |          |  |  |  |      |          |          |          |  |  |     |          |          |          |          |  |      |          |          |          |          |          |      |          |          |          |          |          |
| 10 B                                                                                                               | 2.894953                                                                                                                                                                                                                                                                                                                                                                                                                                                                                                                                                                                                                                                                                                                                                                                                                                                                                                                                                                                                                                                                                                                                                                                                                                                                                                                                                                                                                                                                                                                                                                                                                                                                                                                                                                                                                                                                                                                                                 | 3.797918 | 3.696722 | 2.903346 | 0.000000 |   |   |      |          |  |  |  |  |      |          |          |  |  |  |      |          |          |          |  |  |     |          |          |          |          |  |     |          |          |          |          |          |     |          |          |          |          |          |      |          |          |          |          |          |      |          |          |          |          |          |     |          |          |          |          |          |      |          |          |          |          |          |      |          |          |          |          |          |  |   |   |   |   |    |     |          |  |  |  |  |      |          |          |  |  |  |      |          |          |          |  |  |     |          |          |          |          |  |      |          |          |          |          |          |      |          |          |          |          |          |
| 11 B                                                                                                               | 1.675887                                                                                                                                                                                                                                                                                                                                                                                                                                                                                                                                                                                                                                                                                                                                                                                                                                                                                                                                                                                                                                                                                                                                                                                                                                                                                                                                                                                                                                                                                                                                                                                                                                                                                                                                                                                                                                                                                                                                                 | 3.353582 | 3.471859 | 4.291744 | 2.864433 |   |   |      |          |  |  |  |  |      |          |          |  |  |  |      |          |          |          |  |  |     |          |          |          |          |  |     |          |          |          |          |          |     |          |          |          |          |          |      |          |          |          |          |          |      |          |          |          |          |          |     |          |          |          |          |          |      |          |          |          |          |          |      |          |          |          |          |          |  |   |   |   |   |    |     |          |  |  |  |  |      |          |          |  |  |  |      |          |          |          |  |  |     |          |          |          |          |  |      |          |          |          |          |          |      |          |          |          |          |          |
|  <p>17. -797.74415287 +30.2</p>  | <table border="1"> <thead> <tr> <th></th> <th>1</th> <th>2</th> <th>3</th> <th>4</th> <th>5</th> </tr> </thead> <tbody> <tr><td>1 B</td><td>0.000000</td><td></td><td></td><td></td><td></td></tr> <tr><td>2 Os</td><td>2.190392</td><td>0.000000</td><td></td><td></td><td></td></tr> <tr><td>3 Os</td><td>3.225502</td><td>2.916222</td><td>0.000000</td><td></td><td></td></tr> <tr><td>4 B</td><td>2.979699</td><td>3.978486</td><td>2.250348</td><td>0.000000</td><td></td></tr> <tr><td>5 B</td><td>1.822011</td><td>3.191150</td><td>2.331360</td><td>1.747204</td><td>0.000000</td></tr> <tr><td>6 B</td><td>1.804943</td><td>2.242736</td><td>3.231393</td><td>2.908487</td><td>2.810413</td></tr> <tr><td>7 B</td><td>1.816450</td><td>3.400197</td><td>3.168889</td><td>1.741156</td><td>1.790428</td></tr> <tr><td>8 B</td><td>1.905783</td><td>2.015696</td><td>2.284299</td><td>3.221017</td><td>1.840684</td></tr> <tr><td>9 B</td><td>2.926361</td><td>3.272761</td><td>2.385722</td><td>1.694847</td><td>2.684868</td></tr> <tr><td>10 B</td><td>3.449835</td><td>4.290609</td><td>2.103302</td><td>1.780297</td><td>1.671313</td></tr> <tr><td>11 B</td><td>2.961761</td><td>2.035994</td><td>2.355137</td><td>3.114791</td><td>3.342329</td></tr> <tr> <td></td> <td>6</td> <td>7</td> <td>8</td> <td>9</td> <td>10</td> </tr> <tr><td>6 B</td><td>0.000000</td><td></td><td></td><td></td><td></td></tr> <tr><td>7 B</td><td>1.771060</td><td>0.000000</td><td></td><td></td><td></td></tr> <tr><td>8 B</td><td>3.052029</td><td>3.077037</td><td>0.000000</td><td></td><td></td></tr> <tr><td>9 B</td><td>1.858014</td><td>1.864341</td><td>3.473925</td><td>0.000000</td><td></td></tr> <tr><td>10 B</td><td>4.082304</td><td>3.015890</td><td>2.783352</td><td>3.198302</td><td>0.000000</td></tr> <tr><td>11 B</td><td>1.797240</td><td>2.971048</td><td>3.111754</td><td>1.778814</td><td>4.029138</td></tr> </tbody> </table>  |          | 1        | 2        | 3        | 4 | 5 | 1 B  | 0.000000 |  |  |  |  | 2 Os | 2.190392 | 0.000000 |  |  |  | 3 Os | 3.225502 | 2.916222 | 0.000000 |  |  | 4 B | 2.979699 | 3.978486 | 2.250348 | 0.000000 |  | 5 B | 1.822011 | 3.191150 | 2.331360 | 1.747204 | 0.000000 | 6 B | 1.804943 | 2.242736 | 3.231393 | 2.908487 | 2.810413 | 7 B  | 1.816450 | 3.400197 | 3.168889 | 1.741156 | 1.790428 | 8 B  | 1.905783 | 2.015696 | 2.284299 | 3.221017 | 1.840684 | 9 B | 2.926361 | 3.272761 | 2.385722 | 1.694847 | 2.684868 | 10 B | 3.449835 | 4.290609 | 2.103302 | 1.780297 | 1.671313 | 11 B | 2.961761 | 2.035994 | 2.355137 | 3.114791 | 3.342329 |  | 6 | 7 | 8 | 9 | 10 | 6 B | 0.000000 |  |  |  |  | 7 B  | 1.771060 | 0.000000 |  |  |  | 8 B  | 3.052029 | 3.077037 | 0.000000 |  |  | 9 B | 1.858014 | 1.864341 | 3.473925 | 0.000000 |  | 10 B | 4.082304 | 3.015890 | 2.783352 | 3.198302 | 0.000000 | 11 B | 1.797240 | 2.971048 | 3.111754 | 1.778814 | 4.029138 |
|                                                                                                                    | 1                                                                                                                                                                                                                                                                                                                                                                                                                                                                                                                                                                                                                                                                                                                                                                                                                                                                                                                                                                                                                                                                                                                                                                                                                                                                                                                                                                                                                                                                                                                                                                                                                                                                                                                                                                                                                                                                                                                                                        | 2        | 3        | 4        | 5        |   |   |      |          |  |  |  |  |      |          |          |  |  |  |      |          |          |          |  |  |     |          |          |          |          |  |     |          |          |          |          |          |     |          |          |          |          |          |      |          |          |          |          |          |      |          |          |          |          |          |     |          |          |          |          |          |      |          |          |          |          |          |      |          |          |          |          |          |  |   |   |   |   |    |     |          |  |  |  |  |      |          |          |  |  |  |      |          |          |          |  |  |     |          |          |          |          |  |      |          |          |          |          |          |      |          |          |          |          |          |
| 1 B                                                                                                                | 0.000000                                                                                                                                                                                                                                                                                                                                                                                                                                                                                                                                                                                                                                                                                                                                                                                                                                                                                                                                                                                                                                                                                                                                                                                                                                                                                                                                                                                                                                                                                                                                                                                                                                                                                                                                                                                                                                                                                                                                                 |          |          |          |          |   |   |      |          |  |  |  |  |      |          |          |  |  |  |      |          |          |          |  |  |     |          |          |          |          |  |     |          |          |          |          |          |     |          |          |          |          |          |      |          |          |          |          |          |      |          |          |          |          |          |     |          |          |          |          |          |      |          |          |          |          |          |      |          |          |          |          |          |  |   |   |   |   |    |     |          |  |  |  |  |      |          |          |  |  |  |      |          |          |          |  |  |     |          |          |          |          |  |      |          |          |          |          |          |      |          |          |          |          |          |
| 2 Os                                                                                                               | 2.190392                                                                                                                                                                                                                                                                                                                                                                                                                                                                                                                                                                                                                                                                                                                                                                                                                                                                                                                                                                                                                                                                                                                                                                                                                                                                                                                                                                                                                                                                                                                                                                                                                                                                                                                                                                                                                                                                                                                                                 | 0.000000 |          |          |          |   |   |      |          |  |  |  |  |      |          |          |  |  |  |      |          |          |          |  |  |     |          |          |          |          |  |     |          |          |          |          |          |     |          |          |          |          |          |      |          |          |          |          |          |      |          |          |          |          |          |     |          |          |          |          |          |      |          |          |          |          |          |      |          |          |          |          |          |  |   |   |   |   |    |     |          |  |  |  |  |      |          |          |  |  |  |      |          |          |          |  |  |     |          |          |          |          |  |      |          |          |          |          |          |      |          |          |          |          |          |
| 3 Os                                                                                                               | 3.225502                                                                                                                                                                                                                                                                                                                                                                                                                                                                                                                                                                                                                                                                                                                                                                                                                                                                                                                                                                                                                                                                                                                                                                                                                                                                                                                                                                                                                                                                                                                                                                                                                                                                                                                                                                                                                                                                                                                                                 | 2.916222 | 0.000000 |          |          |   |   |      |          |  |  |  |  |      |          |          |  |  |  |      |          |          |          |  |  |     |          |          |          |          |  |     |          |          |          |          |          |     |          |          |          |          |          |      |          |          |          |          |          |      |          |          |          |          |          |     |          |          |          |          |          |      |          |          |          |          |          |      |          |          |          |          |          |  |   |   |   |   |    |     |          |  |  |  |  |      |          |          |  |  |  |      |          |          |          |  |  |     |          |          |          |          |  |      |          |          |          |          |          |      |          |          |          |          |          |
| 4 B                                                                                                                | 2.979699                                                                                                                                                                                                                                                                                                                                                                                                                                                                                                                                                                                                                                                                                                                                                                                                                                                                                                                                                                                                                                                                                                                                                                                                                                                                                                                                                                                                                                                                                                                                                                                                                                                                                                                                                                                                                                                                                                                                                 | 3.978486 | 2.250348 | 0.000000 |          |   |   |      |          |  |  |  |  |      |          |          |  |  |  |      |          |          |          |  |  |     |          |          |          |          |  |     |          |          |          |          |          |     |          |          |          |          |          |      |          |          |          |          |          |      |          |          |          |          |          |     |          |          |          |          |          |      |          |          |          |          |          |      |          |          |          |          |          |  |   |   |   |   |    |     |          |  |  |  |  |      |          |          |  |  |  |      |          |          |          |  |  |     |          |          |          |          |  |      |          |          |          |          |          |      |          |          |          |          |          |
| 5 B                                                                                                                | 1.822011                                                                                                                                                                                                                                                                                                                                                                                                                                                                                                                                                                                                                                                                                                                                                                                                                                                                                                                                                                                                                                                                                                                                                                                                                                                                                                                                                                                                                                                                                                                                                                                                                                                                                                                                                                                                                                                                                                                                                 | 3.191150 | 2.331360 | 1.747204 | 0.000000 |   |   |      |          |  |  |  |  |      |          |          |  |  |  |      |          |          |          |  |  |     |          |          |          |          |  |     |          |          |          |          |          |     |          |          |          |          |          |      |          |          |          |          |          |      |          |          |          |          |          |     |          |          |          |          |          |      |          |          |          |          |          |      |          |          |          |          |          |  |   |   |   |   |    |     |          |  |  |  |  |      |          |          |  |  |  |      |          |          |          |  |  |     |          |          |          |          |  |      |          |          |          |          |          |      |          |          |          |          |          |
| 6 B                                                                                                                | 1.804943                                                                                                                                                                                                                                                                                                                                                                                                                                                                                                                                                                                                                                                                                                                                                                                                                                                                                                                                                                                                                                                                                                                                                                                                                                                                                                                                                                                                                                                                                                                                                                                                                                                                                                                                                                                                                                                                                                                                                 | 2.242736 | 3.231393 | 2.908487 | 2.810413 |   |   |      |          |  |  |  |  |      |          |          |  |  |  |      |          |          |          |  |  |     |          |          |          |          |  |     |          |          |          |          |          |     |          |          |          |          |          |      |          |          |          |          |          |      |          |          |          |          |          |     |          |          |          |          |          |      |          |          |          |          |          |      |          |          |          |          |          |  |   |   |   |   |    |     |          |  |  |  |  |      |          |          |  |  |  |      |          |          |          |  |  |     |          |          |          |          |  |      |          |          |          |          |          |      |          |          |          |          |          |
| 7 B                                                                                                                | 1.816450                                                                                                                                                                                                                                                                                                                                                                                                                                                                                                                                                                                                                                                                                                                                                                                                                                                                                                                                                                                                                                                                                                                                                                                                                                                                                                                                                                                                                                                                                                                                                                                                                                                                                                                                                                                                                                                                                                                                                 | 3.400197 | 3.168889 | 1.741156 | 1.790428 |   |   |      |          |  |  |  |  |      |          |          |  |  |  |      |          |          |          |  |  |     |          |          |          |          |  |     |          |          |          |          |          |     |          |          |          |          |          |      |          |          |          |          |          |      |          |          |          |          |          |     |          |          |          |          |          |      |          |          |          |          |          |      |          |          |          |          |          |  |   |   |   |   |    |     |          |  |  |  |  |      |          |          |  |  |  |      |          |          |          |  |  |     |          |          |          |          |  |      |          |          |          |          |          |      |          |          |          |          |          |
| 8 B                                                                                                                | 1.905783                                                                                                                                                                                                                                                                                                                                                                                                                                                                                                                                                                                                                                                                                                                                                                                                                                                                                                                                                                                                                                                                                                                                                                                                                                                                                                                                                                                                                                                                                                                                                                                                                                                                                                                                                                                                                                                                                                                                                 | 2.015696 | 2.284299 | 3.221017 | 1.840684 |   |   |      |          |  |  |  |  |      |          |          |  |  |  |      |          |          |          |  |  |     |          |          |          |          |  |     |          |          |          |          |          |     |          |          |          |          |          |      |          |          |          |          |          |      |          |          |          |          |          |     |          |          |          |          |          |      |          |          |          |          |          |      |          |          |          |          |          |  |   |   |   |   |    |     |          |  |  |  |  |      |          |          |  |  |  |      |          |          |          |  |  |     |          |          |          |          |  |      |          |          |          |          |          |      |          |          |          |          |          |
| 9 B                                                                                                                | 2.926361                                                                                                                                                                                                                                                                                                                                                                                                                                                                                                                                                                                                                                                                                                                                                                                                                                                                                                                                                                                                                                                                                                                                                                                                                                                                                                                                                                                                                                                                                                                                                                                                                                                                                                                                                                                                                                                                                                                                                 | 3.272761 | 2.385722 | 1.694847 | 2.684868 |   |   |      |          |  |  |  |  |      |          |          |  |  |  |      |          |          |          |  |  |     |          |          |          |          |  |     |          |          |          |          |          |     |          |          |          |          |          |      |          |          |          |          |          |      |          |          |          |          |          |     |          |          |          |          |          |      |          |          |          |          |          |      |          |          |          |          |          |  |   |   |   |   |    |     |          |  |  |  |  |      |          |          |  |  |  |      |          |          |          |  |  |     |          |          |          |          |  |      |          |          |          |          |          |      |          |          |          |          |          |
| 10 B                                                                                                               | 3.449835                                                                                                                                                                                                                                                                                                                                                                                                                                                                                                                                                                                                                                                                                                                                                                                                                                                                                                                                                                                                                                                                                                                                                                                                                                                                                                                                                                                                                                                                                                                                                                                                                                                                                                                                                                                                                                                                                                                                                 | 4.290609 | 2.103302 | 1.780297 | 1.671313 |   |   |      |          |  |  |  |  |      |          |          |  |  |  |      |          |          |          |  |  |     |          |          |          |          |  |     |          |          |          |          |          |     |          |          |          |          |          |      |          |          |          |          |          |      |          |          |          |          |          |     |          |          |          |          |          |      |          |          |          |          |          |      |          |          |          |          |          |  |   |   |   |   |    |     |          |  |  |  |  |      |          |          |  |  |  |      |          |          |          |  |  |     |          |          |          |          |  |      |          |          |          |          |          |      |          |          |          |          |          |
| 11 B                                                                                                               | 2.961761                                                                                                                                                                                                                                                                                                                                                                                                                                                                                                                                                                                                                                                                                                                                                                                                                                                                                                                                                                                                                                                                                                                                                                                                                                                                                                                                                                                                                                                                                                                                                                                                                                                                                                                                                                                                                                                                                                                                                 | 2.035994 | 2.355137 | 3.114791 | 3.342329 |   |   |      |          |  |  |  |  |      |          |          |  |  |  |      |          |          |          |  |  |     |          |          |          |          |  |     |          |          |          |          |          |     |          |          |          |          |          |      |          |          |          |          |          |      |          |          |          |          |          |     |          |          |          |          |          |      |          |          |          |          |          |      |          |          |          |          |          |  |   |   |   |   |    |     |          |  |  |  |  |      |          |          |  |  |  |      |          |          |          |  |  |     |          |          |          |          |  |      |          |          |          |          |          |      |          |          |          |          |          |
|                                                                                                                    | 6                                                                                                                                                                                                                                                                                                                                                                                                                                                                                                                                                                                                                                                                                                                                                                                                                                                                                                                                                                                                                                                                                                                                                                                                                                                                                                                                                                                                                                                                                                                                                                                                                                                                                                                                                                                                                                                                                                                                                        | 7        | 8        | 9        | 10       |   |   |      |          |  |  |  |  |      |          |          |  |  |  |      |          |          |          |  |  |     |          |          |          |          |  |     |          |          |          |          |          |     |          |          |          |          |          |      |          |          |          |          |          |      |          |          |          |          |          |     |          |          |          |          |          |      |          |          |          |          |          |      |          |          |          |          |          |  |   |   |   |   |    |     |          |  |  |  |  |      |          |          |  |  |  |      |          |          |          |  |  |     |          |          |          |          |  |      |          |          |          |          |          |      |          |          |          |          |          |
| 6 B                                                                                                                | 0.000000                                                                                                                                                                                                                                                                                                                                                                                                                                                                                                                                                                                                                                                                                                                                                                                                                                                                                                                                                                                                                                                                                                                                                                                                                                                                                                                                                                                                                                                                                                                                                                                                                                                                                                                                                                                                                                                                                                                                                 |          |          |          |          |   |   |      |          |  |  |  |  |      |          |          |  |  |  |      |          |          |          |  |  |     |          |          |          |          |  |     |          |          |          |          |          |     |          |          |          |          |          |      |          |          |          |          |          |      |          |          |          |          |          |     |          |          |          |          |          |      |          |          |          |          |          |      |          |          |          |          |          |  |   |   |   |   |    |     |          |  |  |  |  |      |          |          |  |  |  |      |          |          |          |  |  |     |          |          |          |          |  |      |          |          |          |          |          |      |          |          |          |          |          |
| 7 B                                                                                                                | 1.771060                                                                                                                                                                                                                                                                                                                                                                                                                                                                                                                                                                                                                                                                                                                                                                                                                                                                                                                                                                                                                                                                                                                                                                                                                                                                                                                                                                                                                                                                                                                                                                                                                                                                                                                                                                                                                                                                                                                                                 | 0.000000 |          |          |          |   |   |      |          |  |  |  |  |      |          |          |  |  |  |      |          |          |          |  |  |     |          |          |          |          |  |     |          |          |          |          |          |     |          |          |          |          |          |      |          |          |          |          |          |      |          |          |          |          |          |     |          |          |          |          |          |      |          |          |          |          |          |      |          |          |          |          |          |  |   |   |   |   |    |     |          |  |  |  |  |      |          |          |  |  |  |      |          |          |          |  |  |     |          |          |          |          |  |      |          |          |          |          |          |      |          |          |          |          |          |
| 8 B                                                                                                                | 3.052029                                                                                                                                                                                                                                                                                                                                                                                                                                                                                                                                                                                                                                                                                                                                                                                                                                                                                                                                                                                                                                                                                                                                                                                                                                                                                                                                                                                                                                                                                                                                                                                                                                                                                                                                                                                                                                                                                                                                                 | 3.077037 | 0.000000 |          |          |   |   |      |          |  |  |  |  |      |          |          |  |  |  |      |          |          |          |  |  |     |          |          |          |          |  |     |          |          |          |          |          |     |          |          |          |          |          |      |          |          |          |          |          |      |          |          |          |          |          |     |          |          |          |          |          |      |          |          |          |          |          |      |          |          |          |          |          |  |   |   |   |   |    |     |          |  |  |  |  |      |          |          |  |  |  |      |          |          |          |  |  |     |          |          |          |          |  |      |          |          |          |          |          |      |          |          |          |          |          |
| 9 B                                                                                                                | 1.858014                                                                                                                                                                                                                                                                                                                                                                                                                                                                                                                                                                                                                                                                                                                                                                                                                                                                                                                                                                                                                                                                                                                                                                                                                                                                                                                                                                                                                                                                                                                                                                                                                                                                                                                                                                                                                                                                                                                                                 | 1.864341 | 3.473925 | 0.000000 |          |   |   |      |          |  |  |  |  |      |          |          |  |  |  |      |          |          |          |  |  |     |          |          |          |          |  |     |          |          |          |          |          |     |          |          |          |          |          |      |          |          |          |          |          |      |          |          |          |          |          |     |          |          |          |          |          |      |          |          |          |          |          |      |          |          |          |          |          |  |   |   |   |   |    |     |          |  |  |  |  |      |          |          |  |  |  |      |          |          |          |  |  |     |          |          |          |          |  |      |          |          |          |          |          |      |          |          |          |          |          |
| 10 B                                                                                                               | 4.082304                                                                                                                                                                                                                                                                                                                                                                                                                                                                                                                                                                                                                                                                                                                                                                                                                                                                                                                                                                                                                                                                                                                                                                                                                                                                                                                                                                                                                                                                                                                                                                                                                                                                                                                                                                                                                                                                                                                                                 | 3.015890 | 2.783352 | 3.198302 | 0.000000 |   |   |      |          |  |  |  |  |      |          |          |  |  |  |      |          |          |          |  |  |     |          |          |          |          |  |     |          |          |          |          |          |     |          |          |          |          |          |      |          |          |          |          |          |      |          |          |          |          |          |     |          |          |          |          |          |      |          |          |          |          |          |      |          |          |          |          |          |  |   |   |   |   |    |     |          |  |  |  |  |      |          |          |  |  |  |      |          |          |          |  |  |     |          |          |          |          |  |      |          |          |          |          |          |      |          |          |          |          |          |
| 11 B                                                                                                               | 1.797240                                                                                                                                                                                                                                                                                                                                                                                                                                                                                                                                                                                                                                                                                                                                                                                                                                                                                                                                                                                                                                                                                                                                                                                                                                                                                                                                                                                                                                                                                                                                                                                                                                                                                                                                                                                                                                                                                                                                                 | 2.971048 | 3.111754 | 1.778814 | 4.029138 |   |   |      |          |  |  |  |  |      |          |          |  |  |  |      |          |          |          |  |  |     |          |          |          |          |  |     |          |          |          |          |          |     |          |          |          |          |          |      |          |          |          |          |          |      |          |          |          |          |          |     |          |          |          |          |          |      |          |          |          |          |          |      |          |          |          |          |          |  |   |   |   |   |    |     |          |  |  |  |  |      |          |          |  |  |  |      |          |          |          |  |  |     |          |          |          |          |  |      |          |          |          |          |          |      |          |          |          |          |          |
|  <p>18. -797.74251580 +31.2</p> | <table border="1"> <thead> <tr> <th></th> <th>1</th> <th>2</th> <th>3</th> <th>4</th> <th>5</th> </tr> </thead> <tbody> <tr><td>1 Os</td><td>0.000000</td><td></td><td></td><td></td><td></td></tr> <tr><td>2 B</td><td>2.271345</td><td>0.000000</td><td></td><td></td><td></td></tr> <tr><td>3 B</td><td>2.369534</td><td>3.229570</td><td>0.000000</td><td></td><td></td></tr> <tr><td>4 B</td><td>2.426603</td><td>2.784933</td><td>2.550387</td><td>0.000000</td><td></td></tr> <tr><td>5 B</td><td>3.176402</td><td>1.949512</td><td>3.413609</td><td>1.838748</td><td>0.000000</td></tr> <tr><td>6 B</td><td>3.219744</td><td>3.965865</td><td>1.770429</td><td>1.880228</td><td>3.215243</td></tr> <tr><td>7 Os</td><td>3.697318</td><td>3.158064</td><td>2.318323</td><td>2.354373</td><td>2.233312</td></tr> <tr><td>8 B</td><td>2.068837</td><td>1.782526</td><td>3.496958</td><td>1.811603</td><td>1.769044</td></tr> <tr><td>9 B</td><td>2.041837</td><td>3.723422</td><td>1.774203</td><td>2.039705</td><td>3.650008</td></tr> <tr><td>10 B</td><td>2.218744</td><td>1.809644</td><td>1.788847</td><td>2.870476</td><td>2.727572</td></tr> <tr><td>11 B</td><td>3.409357</td><td>1.705122</td><td>3.106506</td><td>3.041571</td><td>1.834152</td></tr> <tr> <td></td> <td>6</td> <td>7</td> <td>8</td> <td>9</td> <td>10</td> </tr> <tr><td>6 B</td><td>0.000000</td><td></td><td></td><td></td><td></td></tr> <tr><td>7 Os</td><td>2.053691</td><td>0.000000</td><td></td><td></td><td></td></tr> <tr><td>8 B</td><td>3.559759</td><td>3.463301</td><td>0.000000</td><td></td><td></td></tr> <tr><td>9 B</td><td>1.733581</td><td>3.288250</td><td>3.111270</td><td>0.000000</td><td></td></tr> <tr><td>10 B</td><td>3.087139</td><td>2.402190</td><td>2.926862</td><td>3.026424</td><td>0.000000</td></tr> <tr><td>11 B</td><td>3.672649</td><td>2.071297</td><td>2.930836</td><td>4.148380</td><td>1.761966</td></tr> </tbody> </table> |          | 1        | 2        | 3        | 4 | 5 | 1 Os | 0.000000 |  |  |  |  | 2 B  | 2.271345 | 0.000000 |  |  |  | 3 B  | 2.369534 | 3.229570 | 0.000000 |  |  | 4 B | 2.426603 | 2.784933 | 2.550387 | 0.000000 |  | 5 B | 3.176402 | 1.949512 | 3.413609 | 1.838748 | 0.000000 | 6 B | 3.219744 | 3.965865 | 1.770429 | 1.880228 | 3.215243 | 7 Os | 3.697318 | 3.158064 | 2.318323 | 2.354373 | 2.233312 | 8 B  | 2.068837 | 1.782526 | 3.496958 | 1.811603 | 1.769044 | 9 B | 2.041837 | 3.723422 | 1.774203 | 2.039705 | 3.650008 | 10 B | 2.218744 | 1.809644 | 1.788847 | 2.870476 | 2.727572 | 11 B | 3.409357 | 1.705122 | 3.106506 | 3.041571 | 1.834152 |  | 6 | 7 | 8 | 9 | 10 | 6 B | 0.000000 |  |  |  |  | 7 Os | 2.053691 | 0.000000 |  |  |  | 8 B  | 3.559759 | 3.463301 | 0.000000 |  |  | 9 B | 1.733581 | 3.288250 | 3.111270 | 0.000000 |  | 10 B | 3.087139 | 2.402190 | 2.926862 | 3.026424 | 0.000000 | 11 B | 3.672649 | 2.071297 | 2.930836 | 4.148380 | 1.761966 |
|                                                                                                                    | 1                                                                                                                                                                                                                                                                                                                                                                                                                                                                                                                                                                                                                                                                                                                                                                                                                                                                                                                                                                                                                                                                                                                                                                                                                                                                                                                                                                                                                                                                                                                                                                                                                                                                                                                                                                                                                                                                                                                                                        | 2        | 3        | 4        | 5        |   |   |      |          |  |  |  |  |      |          |          |  |  |  |      |          |          |          |  |  |     |          |          |          |          |  |     |          |          |          |          |          |     |          |          |          |          |          |      |          |          |          |          |          |      |          |          |          |          |          |     |          |          |          |          |          |      |          |          |          |          |          |      |          |          |          |          |          |  |   |   |   |   |    |     |          |  |  |  |  |      |          |          |  |  |  |      |          |          |          |  |  |     |          |          |          |          |  |      |          |          |          |          |          |      |          |          |          |          |          |
| 1 Os                                                                                                               | 0.000000                                                                                                                                                                                                                                                                                                                                                                                                                                                                                                                                                                                                                                                                                                                                                                                                                                                                                                                                                                                                                                                                                                                                                                                                                                                                                                                                                                                                                                                                                                                                                                                                                                                                                                                                                                                                                                                                                                                                                 |          |          |          |          |   |   |      |          |  |  |  |  |      |          |          |  |  |  |      |          |          |          |  |  |     |          |          |          |          |  |     |          |          |          |          |          |     |          |          |          |          |          |      |          |          |          |          |          |      |          |          |          |          |          |     |          |          |          |          |          |      |          |          |          |          |          |      |          |          |          |          |          |  |   |   |   |   |    |     |          |  |  |  |  |      |          |          |  |  |  |      |          |          |          |  |  |     |          |          |          |          |  |      |          |          |          |          |          |      |          |          |          |          |          |
| 2 B                                                                                                                | 2.271345                                                                                                                                                                                                                                                                                                                                                                                                                                                                                                                                                                                                                                                                                                                                                                                                                                                                                                                                                                                                                                                                                                                                                                                                                                                                                                                                                                                                                                                                                                                                                                                                                                                                                                                                                                                                                                                                                                                                                 | 0.000000 |          |          |          |   |   |      |          |  |  |  |  |      |          |          |  |  |  |      |          |          |          |  |  |     |          |          |          |          |  |     |          |          |          |          |          |     |          |          |          |          |          |      |          |          |          |          |          |      |          |          |          |          |          |     |          |          |          |          |          |      |          |          |          |          |          |      |          |          |          |          |          |  |   |   |   |   |    |     |          |  |  |  |  |      |          |          |  |  |  |      |          |          |          |  |  |     |          |          |          |          |  |      |          |          |          |          |          |      |          |          |          |          |          |
| 3 B                                                                                                                | 2.369534                                                                                                                                                                                                                                                                                                                                                                                                                                                                                                                                                                                                                                                                                                                                                                                                                                                                                                                                                                                                                                                                                                                                                                                                                                                                                                                                                                                                                                                                                                                                                                                                                                                                                                                                                                                                                                                                                                                                                 | 3.229570 | 0.000000 |          |          |   |   |      |          |  |  |  |  |      |          |          |  |  |  |      |          |          |          |  |  |     |          |          |          |          |  |     |          |          |          |          |          |     |          |          |          |          |          |      |          |          |          |          |          |      |          |          |          |          |          |     |          |          |          |          |          |      |          |          |          |          |          |      |          |          |          |          |          |  |   |   |   |   |    |     |          |  |  |  |  |      |          |          |  |  |  |      |          |          |          |  |  |     |          |          |          |          |  |      |          |          |          |          |          |      |          |          |          |          |          |
| 4 B                                                                                                                | 2.426603                                                                                                                                                                                                                                                                                                                                                                                                                                                                                                                                                                                                                                                                                                                                                                                                                                                                                                                                                                                                                                                                                                                                                                                                                                                                                                                                                                                                                                                                                                                                                                                                                                                                                                                                                                                                                                                                                                                                                 | 2.784933 | 2.550387 | 0.000000 |          |   |   |      |          |  |  |  |  |      |          |          |  |  |  |      |          |          |          |  |  |     |          |          |          |          |  |     |          |          |          |          |          |     |          |          |          |          |          |      |          |          |          |          |          |      |          |          |          |          |          |     |          |          |          |          |          |      |          |          |          |          |          |      |          |          |          |          |          |  |   |   |   |   |    |     |          |  |  |  |  |      |          |          |  |  |  |      |          |          |          |  |  |     |          |          |          |          |  |      |          |          |          |          |          |      |          |          |          |          |          |
| 5 B                                                                                                                | 3.176402                                                                                                                                                                                                                                                                                                                                                                                                                                                                                                                                                                                                                                                                                                                                                                                                                                                                                                                                                                                                                                                                                                                                                                                                                                                                                                                                                                                                                                                                                                                                                                                                                                                                                                                                                                                                                                                                                                                                                 | 1.949512 | 3.413609 | 1.838748 | 0.000000 |   |   |      |          |  |  |  |  |      |          |          |  |  |  |      |          |          |          |  |  |     |          |          |          |          |  |     |          |          |          |          |          |     |          |          |          |          |          |      |          |          |          |          |          |      |          |          |          |          |          |     |          |          |          |          |          |      |          |          |          |          |          |      |          |          |          |          |          |  |   |   |   |   |    |     |          |  |  |  |  |      |          |          |  |  |  |      |          |          |          |  |  |     |          |          |          |          |  |      |          |          |          |          |          |      |          |          |          |          |          |
| 6 B                                                                                                                | 3.219744                                                                                                                                                                                                                                                                                                                                                                                                                                                                                                                                                                                                                                                                                                                                                                                                                                                                                                                                                                                                                                                                                                                                                                                                                                                                                                                                                                                                                                                                                                                                                                                                                                                                                                                                                                                                                                                                                                                                                 | 3.965865 | 1.770429 | 1.880228 | 3.215243 |   |   |      |          |  |  |  |  |      |          |          |  |  |  |      |          |          |          |  |  |     |          |          |          |          |  |     |          |          |          |          |          |     |          |          |          |          |          |      |          |          |          |          |          |      |          |          |          |          |          |     |          |          |          |          |          |      |          |          |          |          |          |      |          |          |          |          |          |  |   |   |   |   |    |     |          |  |  |  |  |      |          |          |  |  |  |      |          |          |          |  |  |     |          |          |          |          |  |      |          |          |          |          |          |      |          |          |          |          |          |
| 7 Os                                                                                                               | 3.697318                                                                                                                                                                                                                                                                                                                                                                                                                                                                                                                                                                                                                                                                                                                                                                                                                                                                                                                                                                                                                                                                                                                                                                                                                                                                                                                                                                                                                                                                                                                                                                                                                                                                                                                                                                                                                                                                                                                                                 | 3.158064 | 2.318323 | 2.354373 | 2.233312 |   |   |      |          |  |  |  |  |      |          |          |  |  |  |      |          |          |          |  |  |     |          |          |          |          |  |     |          |          |          |          |          |     |          |          |          |          |          |      |          |          |          |          |          |      |          |          |          |          |          |     |          |          |          |          |          |      |          |          |          |          |          |      |          |          |          |          |          |  |   |   |   |   |    |     |          |  |  |  |  |      |          |          |  |  |  |      |          |          |          |  |  |     |          |          |          |          |  |      |          |          |          |          |          |      |          |          |          |          |          |
| 8 B                                                                                                                | 2.068837                                                                                                                                                                                                                                                                                                                                                                                                                                                                                                                                                                                                                                                                                                                                                                                                                                                                                                                                                                                                                                                                                                                                                                                                                                                                                                                                                                                                                                                                                                                                                                                                                                                                                                                                                                                                                                                                                                                                                 | 1.782526 | 3.496958 | 1.811603 | 1.769044 |   |   |      |          |  |  |  |  |      |          |          |  |  |  |      |          |          |          |  |  |     |          |          |          |          |  |     |          |          |          |          |          |     |          |          |          |          |          |      |          |          |          |          |          |      |          |          |          |          |          |     |          |          |          |          |          |      |          |          |          |          |          |      |          |          |          |          |          |  |   |   |   |   |    |     |          |  |  |  |  |      |          |          |  |  |  |      |          |          |          |  |  |     |          |          |          |          |  |      |          |          |          |          |          |      |          |          |          |          |          |
| 9 B                                                                                                                | 2.041837                                                                                                                                                                                                                                                                                                                                                                                                                                                                                                                                                                                                                                                                                                                                                                                                                                                                                                                                                                                                                                                                                                                                                                                                                                                                                                                                                                                                                                                                                                                                                                                                                                                                                                                                                                                                                                                                                                                                                 | 3.723422 | 1.774203 | 2.039705 | 3.650008 |   |   |      |          |  |  |  |  |      |          |          |  |  |  |      |          |          |          |  |  |     |          |          |          |          |  |     |          |          |          |          |          |     |          |          |          |          |          |      |          |          |          |          |          |      |          |          |          |          |          |     |          |          |          |          |          |      |          |          |          |          |          |      |          |          |          |          |          |  |   |   |   |   |    |     |          |  |  |  |  |      |          |          |  |  |  |      |          |          |          |  |  |     |          |          |          |          |  |      |          |          |          |          |          |      |          |          |          |          |          |
| 10 B                                                                                                               | 2.218744                                                                                                                                                                                                                                                                                                                                                                                                                                                                                                                                                                                                                                                                                                                                                                                                                                                                                                                                                                                                                                                                                                                                                                                                                                                                                                                                                                                                                                                                                                                                                                                                                                                                                                                                                                                                                                                                                                                                                 | 1.809644 | 1.788847 | 2.870476 | 2.727572 |   |   |      |          |  |  |  |  |      |          |          |  |  |  |      |          |          |          |  |  |     |          |          |          |          |  |     |          |          |          |          |          |     |          |          |          |          |          |      |          |          |          |          |          |      |          |          |          |          |          |     |          |          |          |          |          |      |          |          |          |          |          |      |          |          |          |          |          |  |   |   |   |   |    |     |          |  |  |  |  |      |          |          |  |  |  |      |          |          |          |  |  |     |          |          |          |          |  |      |          |          |          |          |          |      |          |          |          |          |          |
| 11 B                                                                                                               | 3.409357                                                                                                                                                                                                                                                                                                                                                                                                                                                                                                                                                                                                                                                                                                                                                                                                                                                                                                                                                                                                                                                                                                                                                                                                                                                                                                                                                                                                                                                                                                                                                                                                                                                                                                                                                                                                                                                                                                                                                 | 1.705122 | 3.106506 | 3.041571 | 1.834152 |   |   |      |          |  |  |  |  |      |          |          |  |  |  |      |          |          |          |  |  |     |          |          |          |          |  |     |          |          |          |          |          |     |          |          |          |          |          |      |          |          |          |          |          |      |          |          |          |          |          |     |          |          |          |          |          |      |          |          |          |          |          |      |          |          |          |          |          |  |   |   |   |   |    |     |          |  |  |  |  |      |          |          |  |  |  |      |          |          |          |  |  |     |          |          |          |          |  |      |          |          |          |          |          |      |          |          |          |          |          |
|                                                                                                                    | 6                                                                                                                                                                                                                                                                                                                                                                                                                                                                                                                                                                                                                                                                                                                                                                                                                                                                                                                                                                                                                                                                                                                                                                                                                                                                                                                                                                                                                                                                                                                                                                                                                                                                                                                                                                                                                                                                                                                                                        | 7        | 8        | 9        | 10       |   |   |      |          |  |  |  |  |      |          |          |  |  |  |      |          |          |          |  |  |     |          |          |          |          |  |     |          |          |          |          |          |     |          |          |          |          |          |      |          |          |          |          |          |      |          |          |          |          |          |     |          |          |          |          |          |      |          |          |          |          |          |      |          |          |          |          |          |  |   |   |   |   |    |     |          |  |  |  |  |      |          |          |  |  |  |      |          |          |          |  |  |     |          |          |          |          |  |      |          |          |          |          |          |      |          |          |          |          |          |
| 6 B                                                                                                                | 0.000000                                                                                                                                                                                                                                                                                                                                                                                                                                                                                                                                                                                                                                                                                                                                                                                                                                                                                                                                                                                                                                                                                                                                                                                                                                                                                                                                                                                                                                                                                                                                                                                                                                                                                                                                                                                                                                                                                                                                                 |          |          |          |          |   |   |      |          |  |  |  |  |      |          |          |  |  |  |      |          |          |          |  |  |     |          |          |          |          |  |     |          |          |          |          |          |     |          |          |          |          |          |      |          |          |          |          |          |      |          |          |          |          |          |     |          |          |          |          |          |      |          |          |          |          |          |      |          |          |          |          |          |  |   |   |   |   |    |     |          |  |  |  |  |      |          |          |  |  |  |      |          |          |          |  |  |     |          |          |          |          |  |      |          |          |          |          |          |      |          |          |          |          |          |
| 7 Os                                                                                                               | 2.053691                                                                                                                                                                                                                                                                                                                                                                                                                                                                                                                                                                                                                                                                                                                                                                                                                                                                                                                                                                                                                                                                                                                                                                                                                                                                                                                                                                                                                                                                                                                                                                                                                                                                                                                                                                                                                                                                                                                                                 | 0.000000 |          |          |          |   |   |      |          |  |  |  |  |      |          |          |  |  |  |      |          |          |          |  |  |     |          |          |          |          |  |     |          |          |          |          |          |     |          |          |          |          |          |      |          |          |          |          |          |      |          |          |          |          |          |     |          |          |          |          |          |      |          |          |          |          |          |      |          |          |          |          |          |  |   |   |   |   |    |     |          |  |  |  |  |      |          |          |  |  |  |      |          |          |          |  |  |     |          |          |          |          |  |      |          |          |          |          |          |      |          |          |          |          |          |
| 8 B                                                                                                                | 3.559759                                                                                                                                                                                                                                                                                                                                                                                                                                                                                                                                                                                                                                                                                                                                                                                                                                                                                                                                                                                                                                                                                                                                                                                                                                                                                                                                                                                                                                                                                                                                                                                                                                                                                                                                                                                                                                                                                                                                                 | 3.463301 | 0.000000 |          |          |   |   |      |          |  |  |  |  |      |          |          |  |  |  |      |          |          |          |  |  |     |          |          |          |          |  |     |          |          |          |          |          |     |          |          |          |          |          |      |          |          |          |          |          |      |          |          |          |          |          |     |          |          |          |          |          |      |          |          |          |          |          |      |          |          |          |          |          |  |   |   |   |   |    |     |          |  |  |  |  |      |          |          |  |  |  |      |          |          |          |  |  |     |          |          |          |          |  |      |          |          |          |          |          |      |          |          |          |          |          |
| 9 B                                                                                                                | 1.733581                                                                                                                                                                                                                                                                                                                                                                                                                                                                                                                                                                                                                                                                                                                                                                                                                                                                                                                                                                                                                                                                                                                                                                                                                                                                                                                                                                                                                                                                                                                                                                                                                                                                                                                                                                                                                                                                                                                                                 | 3.288250 | 3.111270 | 0.000000 |          |   |   |      |          |  |  |  |  |      |          |          |  |  |  |      |          |          |          |  |  |     |          |          |          |          |  |     |          |          |          |          |          |     |          |          |          |          |          |      |          |          |          |          |          |      |          |          |          |          |          |     |          |          |          |          |          |      |          |          |          |          |          |      |          |          |          |          |          |  |   |   |   |   |    |     |          |  |  |  |  |      |          |          |  |  |  |      |          |          |          |  |  |     |          |          |          |          |  |      |          |          |          |          |          |      |          |          |          |          |          |
| 10 B                                                                                                               | 3.087139                                                                                                                                                                                                                                                                                                                                                                                                                                                                                                                                                                                                                                                                                                                                                                                                                                                                                                                                                                                                                                                                                                                                                                                                                                                                                                                                                                                                                                                                                                                                                                                                                                                                                                                                                                                                                                                                                                                                                 | 2.402190 | 2.926862 | 3.026424 | 0.000000 |   |   |      |          |  |  |  |  |      |          |          |  |  |  |      |          |          |          |  |  |     |          |          |          |          |  |     |          |          |          |          |          |     |          |          |          |          |          |      |          |          |          |          |          |      |          |          |          |          |          |     |          |          |          |          |          |      |          |          |          |          |          |      |          |          |          |          |          |  |   |   |   |   |    |     |          |  |  |  |  |      |          |          |  |  |  |      |          |          |          |  |  |     |          |          |          |          |  |      |          |          |          |          |          |      |          |          |          |          |          |
| 11 B                                                                                                               | 3.672649                                                                                                                                                                                                                                                                                                                                                                                                                                                                                                                                                                                                                                                                                                                                                                                                                                                                                                                                                                                                                                                                                                                                                                                                                                                                                                                                                                                                                                                                                                                                                                                                                                                                                                                                                                                                                                                                                                                                                 | 2.071297 | 2.930836 | 4.148380 | 1.761966 |   |   |      |          |  |  |  |  |      |          |          |  |  |  |      |          |          |          |  |  |     |          |          |          |          |  |     |          |          |          |          |          |     |          |          |          |          |          |      |          |          |          |          |          |      |          |          |          |          |          |     |          |          |          |          |          |      |          |          |          |          |          |      |          |          |          |          |          |  |   |   |   |   |    |     |          |  |  |  |  |      |          |          |  |  |  |      |          |          |          |  |  |     |          |          |          |          |  |      |          |          |          |          |          |      |          |          |          |          |          |

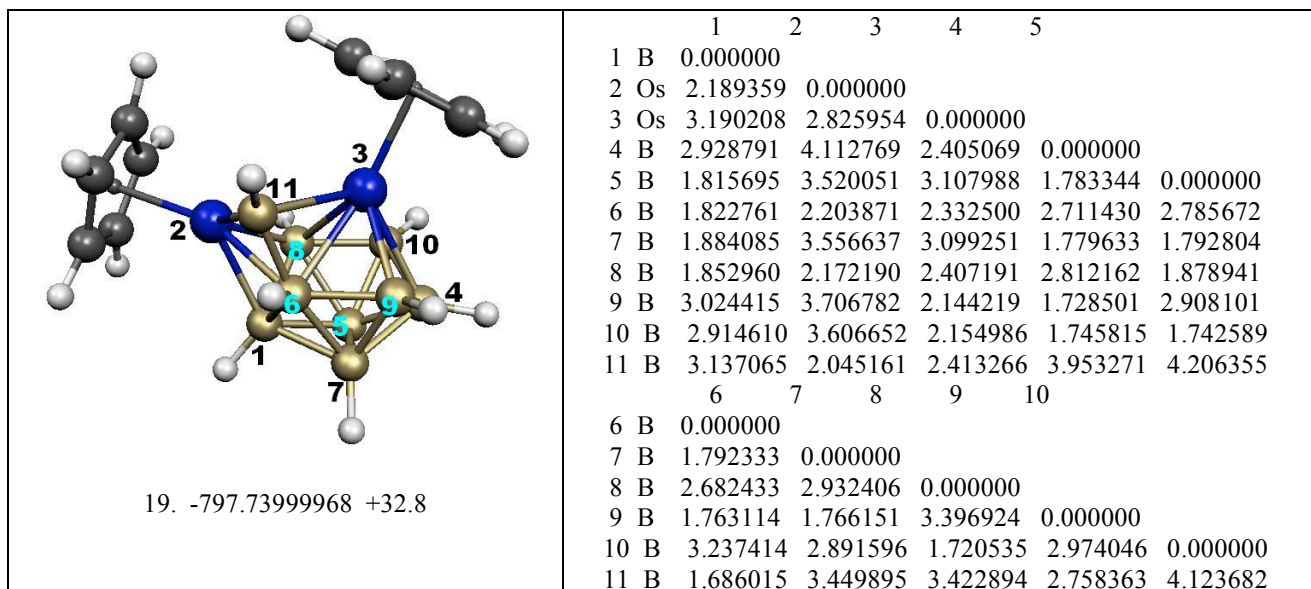

Table S9C. Energy ranking of the  $\text{Cp}_2\text{Os}_2\text{B}_9\text{H}_9$  structures

|    |                           |               |       |
|----|---------------------------|---------------|-------|
| 1  | 1-Os-global minimum       | -797.79225403 | 0.00  |
| 2  | 1-Os-PentaCapTrPr-d       | -797.77348532 | 11.78 |
| 3  | 1-Os-PentaCapTrPr-f       | -797.77348532 | 11.78 |
| 4  | 2-Os-TricapCubeA-b        | -797.76702255 | 15.83 |
| 5  | 2-Os-TricapCubeB-j        | -797.76701582 | 15.84 |
| 6  | 2-Os-TricapCubeA-k        | -797.76649440 | 16.16 |
| 7  | 2-Os-TricapCubeA-q        | -797.76649440 | 16.16 |
| 8  | 2-Os-TricapCubeB-g        | -797.76649435 | 16.16 |
| 9  | 4-Os-lcos-1vx-d           | -797.76644029 | 16.20 |
| 10 | 3-Os-OhfusettoPentBipyr-o | -797.76643994 | 16.20 |
| 11 | 4-Os-lcos-1vx-n           | -797.76383872 | 17.83 |
| 12 | 1-Os-PentaCapTrPr-k       | -797.76383871 | 17.83 |
| 13 | 2-Os-TricapCubeB-p        | -797.76361798 | 17.97 |
| 14 | 2-Os-TricapCubeA-j        | -797.76346454 | 18.07 |
| 15 | 1-Os-PentaCapTrPr-h       | -797.75788726 | 21.57 |
| 16 | 2-Os-TricapCubeB-b        | -797.75788726 | 21.57 |
| 17 | 2-Os-TricapCubeB-f        | -797.75788726 | 21.57 |
| 18 | 2-Os-TricapCubeB-o        | -797.75788726 | 21.57 |
| 19 | 1-Os-PentaCapTrPr-j       | -797.75788724 | 21.57 |
| 20 | 1-Os-PentaCapTrPr-b       | -797.75647286 | 22.45 |
| 21 | 4-Os-lcos-1vx-l           | -797.75015319 | 26.42 |
| 22 | 2-Os-TricapCubeA-m        | -797.74945369 | 26.86 |
| 23 | 2-Os-TricapCubeB-a        | -797.74945369 | 26.86 |
| 24 | 2-Os-TricapCubeA-r        | -797.74918738 | 27.02 |
| 25 | 4-Os-lcos-1vx-c           | -797.74918738 | 27.02 |
| 26 | 4-Os-lcos-1vx-j           | -797.74918738 | 27.02 |
| 27 | 4-Os-lcos-1vx-o           | -797.74918737 | 27.02 |
| 28 | 2-Os-TricapCubeA-c        | -797.74554496 | 29.31 |
| 29 | 2-Os-TricapCubeA-a        | -797.74554492 | 29.31 |
| 30 | 1-Os-PentaCapTrPr-i       | -797.74554491 | 29.31 |
| 31 | 2-Os-TricapCubeB-n        | -797.74554491 | 29.31 |
| 32 | 2-Os-TricapCubeA-o        | -797.74485961 | 29.74 |
| 33 | 4-Os-lcos-1vx-h_r-25-114  | -797.74415287 | 30.18 |
| 34 | 4-Os-lcos-1vx-h_r-104     | -797.74415286 | 30.18 |
| 35 | 2-Os-TricapCubeB-d        | -797.74251580 | 31.21 |
| 36 | 2-Os-TricapCubeA-n        | -797.74251574 | 31.21 |
| 37 | 4-Os-lcos-1vx-h_r-171-83  | -797.73999968 | 32.79 |
| 38 | 4-Os-lcos-1vx-h_r-27-53   | -797.73999968 | 32.79 |
| 39 | 4-Os-lcos-1vx-i           | -797.73999967 | 32.79 |
| 40 | 1-Os-PentaCapTrPr-e       | -797.73814905 | 33.95 |
| 41 | 4-Os-lcos-1vx-k           | -797.73579475 | 35.43 |
| 42 | 2-Os-TricapCubeB-i        | -797.73579474 | 35.43 |
| 43 | 4-Os-lcos-1vx-m           | -797.73579474 | 35.43 |

|    |                                 |               |       |
|----|---------------------------------|---------------|-------|
| 44 | 4-Os-Icos-1vx-r_r-15            | -797.73579474 | 35.43 |
| 45 | 2-Os-TricapCubeA-p              | -797.73579473 | 35.43 |
| 46 | 4-Os-Icos-1vx-r                 | -797.73575348 | 35.45 |
| 47 | 2-Os-TricapCubeB-h              | -797.73265890 | 37.40 |
| 48 | 2-Os-TricapCubeA-e              | -797.73150479 | 38.12 |
| 49 | 2-Os-TricapCubeB-m              | -797.73135717 | 38.21 |
| 50 | 4-Os-Icos-1vx-b                 | -797.73135717 | 38.21 |
| 51 | 4-Os-Icos-1vx-p                 | -797.72934693 | 39.47 |
| 52 | 1-Os-PentaCapTrPr-g             | -797.72728152 | 40.77 |
| 53 | 2-Os-TricapCubeA-i              | -797.72570405 | 41.76 |
| 54 | 2-Os-TricapCubeA-d              | -797.72566344 | 41.79 |
| 55 | 3-Os-OhfusettoPentBipyr-f_r-221 | -797.72546600 | 41.91 |
| 56 | 3-Os-OhfusettoPentBipyr-h       | -797.72500230 | 42.20 |
| 57 | 2-Os-TricapCubeB-l              | -797.72248552 | 43.78 |
| 58 | 2-Os-TricapCubeB-e              | -797.72047481 | 45.04 |
| 59 | 2-Os-TricapCubeB-k              | -797.72047481 | 45.04 |
| 60 | 4-Os-Icos-1vx-a_r-38            | -797.72047477 | 45.04 |
| 61 | 2-Os-TricapCubeA-g              | -797.72030684 | 45.15 |
| 62 | 4-Os-Icos-1vx-a i-38            | -797.71801451 | 46.59 |
| 63 | 3-Os-OhfusettoPentBipyr-j       | -797.71461946 | 48.72 |
| 64 | 4-Os-Structure-3                | -797.71386890 | 49.19 |
| 65 | 2-Os-TricapCubeB-c              | -797.71313785 | 49.65 |
| 66 | 4-Os-Icos-1vx-h_r-27 i-53       | -797.70963552 | 51.84 |
| 67 | 4-Os-Icos-1vx-h_r-171 i-83      | -797.70963551 | 51.84 |
| 68 | 4-Os-Icos-1vx-h_r-25 i-114      | -797.70913033 | 52.16 |
| 69 | 4-Os-Icos-1vx-s                 | -797.70368766 | 55.58 |
| 70 | 2-Os-TricapCubeA-f              | -797.70364589 | 55.60 |
| 71 | 4-Os-Icos-1vx-q_r-42            | -797.70359846 | 55.63 |
| 72 | 4-Os-Icos-1vx-q_r-39            | -797.70328211 | 55.83 |
| 73 | 4-Os-Icos-1vx-q imag            | -797.70251060 | 56.31 |
| 74 | 2-Os-TricapCubeA-h              | -797.69979393 | 58.02 |
| 75 | 4-Os-Icos-1vx-e                 | -797.69845591 | 58.86 |
| 76 | 3-Os-OhfusettoPentBipyr-g       | -797.69534226 | 60.81 |
| 77 | 3-Os-OhfusettoPentBipyr-m       | -797.69342467 | 62.02 |
| 78 | 3-Os-OhfusettoPentBipyr-s       | -797.68977677 | 64.30 |
| 79 | 4-Os-Icos-1vx-g_r-19            | -797.68509192 | 67.24 |
| 80 | 4-Os-Icos-1vx-g i-19            | -797.68484987 | 67.40 |
| 81 | 3-Os-OhfusettoPentBipyr-b       | -797.68188447 | 69.26 |
| 82 | 2-Os-TricapCubeA-l              | -797.68139945 | 69.56 |
| 83 | 4-Os-Icos-1vx-f                 | -797.67557911 | 73.21 |
| 84 | 3-Os-OhfusettoPentBipyr-v       | -797.67450008 | 73.89 |
| 85 | 4-Os-Icos-1vx-t                 | -797.67444797 | 73.92 |
| 86 | 3-Os-OhfusettoPentBipyr-l       | -797.67404227 | 74.18 |
| 87 | 3-Os-OhfusettoPentBipyr-a       | -797.67260028 | 75.08 |
| 88 | 3-Os-OhfusettoPentBipyr-w       | -797.66301722 | 81.10 |

|     |                                    |               |        |
|-----|------------------------------------|---------------|--------|
| 89  | 3-Os-OhfusetopentBipyr-n           | -797.65641648 | 85.24  |
| 90  | 3-Os-OhfusetopentBipyr-k_r-81-394  | -797.65595974 | 85.52  |
| 91  | 3-Os-OhfusetopentBipyr-k_r-422     | -797.65595972 | 85.52  |
| 92  | 3-Os-OhfusetopentBipyr-k_r-83      | -797.65595970 | 85.52  |
| 93  | 3-Os-OhfusetopentBipyr-q           | -797.65539357 | 85.88  |
| 94  | 3-Os-OhfusetopentBipyr-p           | -797.65119773 | 88.51  |
| 95  | 3-Os-OhfusetopentBipyr-c           | -797.65113961 | 88.55  |
| 96  | 3-Os-OhfusetopentBipyr-i           | -797.65037231 | 89.03  |
| 97  | 3-Os-OhfusetopentBipyr-d           | -797.64952222 | 89.56  |
| 98  | 1-Os-PentaCapTrPr-a                | -797.64842652 | 90.25  |
| 99  | 3-Os-OhfusetopentBipyr-u           | -797.64708141 | 91.10  |
| 100 | 3-Os-OhfusetopentBipyr-t           | -797.64486377 | 92.49  |
| 101 | 3-Os-OhfusetopentBipyr-kr-81 i-394 | -797.64372732 | 93.20  |
| 102 | 3-Os-OhfusetopentBipyr-e           | -797.64317968 | 93.54  |
| 103 | 3-Os-OhfusetopentBipyr-x_r-78      | -797.64227446 | 94.11  |
| 104 | 3-Os-OhfusetopentBipyr-f i-221     | -797.64084225 | 95.01  |
| 105 | 3-Os-OhfusetopentBipyr-x i-78      | -797.63379641 | 99.43  |
| 106 | 3-Os-OhfusetopentBipyr-r           | -797.63141627 | 100.93 |
| 107 | 3-Os-OhfusetopentBipyr-k imag      | -797.63122908 | 101.04 |
| 108 | 4-Os-Icos-1vx-h imag               | -797.60340532 | 118.50 |
| 109 | 4-Os-Bipyr-nonag                   | -797.58393876 | 130.72 |

## The 12-vertex $\text{Cp}_2\text{Os}_2\text{B}_{10}\text{H}_{10}$ Structures

Table S10A. Initial structures

Table S10B. Distances in the lowest energy structures.

Table S10C. Global ranking of all structures

Table S10A. Initial  $\text{Cp}_2\text{Os}_2\text{B}_{10}\text{H}_{10}$  structures (one example from each family); 22 structures in total

**Initial structures**

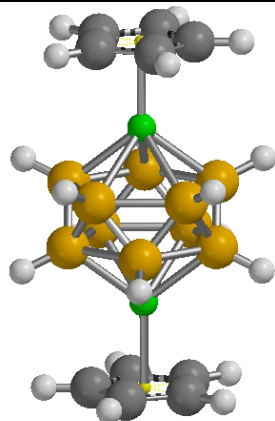

1. Icosahedron 3 structures

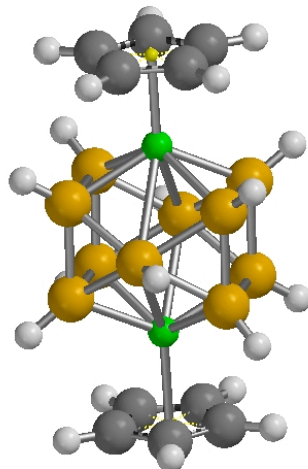

2. Cubeoctahedron 9 structures

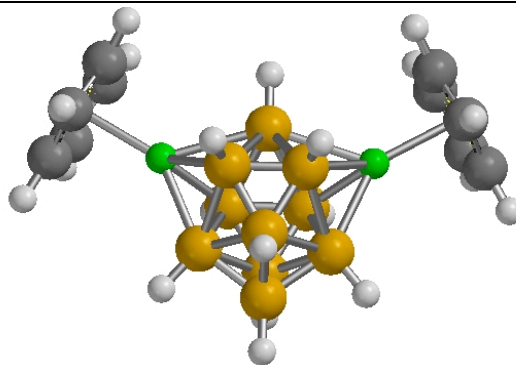

3. Anticubeoctahedron 10 structures

Table S10B.. Distance table for the lowest energy Cp<sub>2</sub>Os<sub>2</sub>B<sub>10</sub>H<sub>10</sub> structures

| 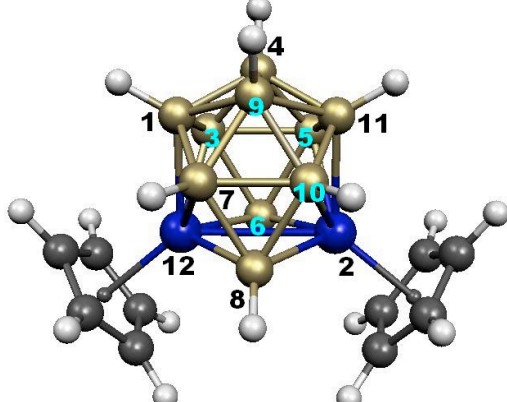 <p>1. -823.25459160 0.0 C<sub>2v</sub></p>    | <table border="1"> <thead> <tr> <th></th> <th>1</th> <th>2</th> <th>3</th> <th>4</th> <th>5</th> </tr> </thead> <tbody> <tr><td>1 B</td><td>0.000000</td><td></td><td></td><td></td><td></td></tr> <tr><td>2 Os</td><td>3.673748</td><td>0.000000</td><td></td><td></td><td></td></tr> <tr><td>3 B</td><td>1.750179</td><td>3.241934</td><td>0.000000</td><td></td><td></td></tr> <tr><td>4 B</td><td>1.785502</td><td>3.347174</td><td>1.762035</td><td>0.000000</td><td></td></tr> <tr><td>5 B</td><td>2.915586</td><td>2.243001</td><td>1.889600</td><td>1.762035</td><td>0.000000</td></tr> <tr><td>6 B</td><td>3.130472</td><td>2.122477</td><td>1.862098</td><td>3.013429</td><td>1.862098</td></tr> <tr><td>7 B</td><td>1.757805</td><td>3.257771</td><td>3.046244</td><td>2.933601</td><td>3.619548</td></tr> <tr><td>8 B</td><td>3.263181</td><td>2.077975</td><td>3.631041</td><td>3.919267</td><td>3.631041</td></tr> <tr><td>9 B</td><td>1.825687</td><td>3.316811</td><td>2.955961</td><td>1.836989</td><td>2.955961</td></tr> <tr><td>10 B</td><td>2.984885</td><td>2.179202</td><td>3.619548</td><td>2.933601</td><td>3.046244</td></tr> <tr><td>11 B</td><td>2.877600</td><td>2.269919</td><td>2.915586</td><td>1.785502</td><td>1.750179</td></tr> <tr><td>12 Os</td><td>2.269919</td><td>2.899600</td><td>2.243001</td><td>3.347174</td><td>3.241934</td></tr> <tr> <td></td> <td>6</td> <td>7</td> <td>8</td> <td>9</td> <td>10</td> </tr> <tr><td>6 B</td><td>0.000000</td><td></td><td></td><td></td><td></td></tr> <tr><td>7 B</td><td>3.579029</td><td>0.000000</td><td></td><td></td><td></td></tr> <tr><td>8 B</td><td>3.022897</td><td>2.034710</td><td>0.000000</td><td></td><td></td></tr> <tr><td>9 B</td><td>3.815901</td><td>1.746966</td><td>3.121104</td><td>0.000000</td><td></td></tr> <tr><td>10 B</td><td>3.579029</td><td>2.022400</td><td>2.034710</td><td>1.746966</td><td>0.000000</td></tr> <tr><td>11 B</td><td>3.130472</td><td>2.984885</td><td>3.263181</td><td>1.825687</td><td>1.757805</td></tr> <tr><td>12 Os</td><td>2.122477</td><td>2.179202</td><td>2.077975</td><td>3.316811</td><td>3.257771</td></tr> <tr> <td></td> <td>11</td> <td>12</td> <td></td> <td></td> <td></td> </tr> <tr><td>11 B</td><td>0.000000</td><td></td><td></td><td></td><td></td></tr> <tr><td>12 Os</td><td>3.673748</td><td>0.000000</td><td></td><td></td><td></td></tr> </tbody> </table> |          | 1        | 2        | 3        | 4 | 5 | 1 B | 0.000000 |  |  |  |  | 2 Os | 3.673748 | 0.000000 |  |  |  | 3 B | 1.750179 | 3.241934 | 0.000000 |  |  | 4 B | 1.785502 | 3.347174 | 1.762035 | 0.000000 |  | 5 B | 2.915586 | 2.243001 | 1.889600 | 1.762035 | 0.000000 | 6 B | 3.130472 | 2.122477 | 1.862098 | 3.013429 | 1.862098 | 7 B | 1.757805 | 3.257771 | 3.046244 | 2.933601 | 3.619548 | 8 B | 3.263181 | 2.077975 | 3.631041 | 3.919267 | 3.631041 | 9 B | 1.825687 | 3.316811 | 2.955961 | 1.836989 | 2.955961 | 10 B  | 2.984885 | 2.179202 | 3.619548 | 2.933601 | 3.046244 | 11 B | 2.877600 | 2.269919 | 2.915586 | 1.785502 | 1.750179 | 12 Os | 2.269919 | 2.899600 | 2.243001 | 3.347174 | 3.241934 |  | 6 | 7 | 8 | 9 | 10 | 6 B | 0.000000 |  |  |  |  | 7 B | 3.579029 | 0.000000 |  |  |  | 8 B | 3.022897 | 2.034710 | 0.000000 |  |  | 9 B | 3.815901 | 1.746966 | 3.121104 | 0.000000 |  | 10 B  | 3.579029 | 2.022400 | 2.034710 | 1.746966 | 0.000000 | 11 B | 3.130472 | 2.984885 | 3.263181 | 1.825687 | 1.757805 | 12 Os | 2.122477 | 2.179202 | 2.077975 | 3.316811 | 3.257771 |  | 11 | 12 |  |  |  | 11 B | 0.000000 |  |  |  |  | 12 Os | 3.673748 | 0.000000 |  |  |  |
|---------------------------------------------------------------------------------------------------------------------------------|------------------------------------------------------------------------------------------------------------------------------------------------------------------------------------------------------------------------------------------------------------------------------------------------------------------------------------------------------------------------------------------------------------------------------------------------------------------------------------------------------------------------------------------------------------------------------------------------------------------------------------------------------------------------------------------------------------------------------------------------------------------------------------------------------------------------------------------------------------------------------------------------------------------------------------------------------------------------------------------------------------------------------------------------------------------------------------------------------------------------------------------------------------------------------------------------------------------------------------------------------------------------------------------------------------------------------------------------------------------------------------------------------------------------------------------------------------------------------------------------------------------------------------------------------------------------------------------------------------------------------------------------------------------------------------------------------------------------------------------------------------------------------------------------------------------------------------------------------------------------------------------------------------------------------------------------------------------------------------------------------------------------------------------------------------------------------------------------------------------------------------------------------------------------------------------------------------------------------------------------------------------------------------------------------------------------------------------------------------------------------------------------------------------------------|----------|----------|----------|----------|---|---|-----|----------|--|--|--|--|------|----------|----------|--|--|--|-----|----------|----------|----------|--|--|-----|----------|----------|----------|----------|--|-----|----------|----------|----------|----------|----------|-----|----------|----------|----------|----------|----------|-----|----------|----------|----------|----------|----------|-----|----------|----------|----------|----------|----------|-----|----------|----------|----------|----------|----------|-------|----------|----------|----------|----------|----------|------|----------|----------|----------|----------|----------|-------|----------|----------|----------|----------|----------|--|---|---|---|---|----|-----|----------|--|--|--|--|-----|----------|----------|--|--|--|-----|----------|----------|----------|--|--|-----|----------|----------|----------|----------|--|-------|----------|----------|----------|----------|----------|------|----------|----------|----------|----------|----------|-------|----------|----------|----------|----------|----------|--|----|----|--|--|--|------|----------|--|--|--|--|-------|----------|----------|--|--|--|
|                                                                                                                                 | 1                                                                                                                                                                                                                                                                                                                                                                                                                                                                                                                                                                                                                                                                                                                                                                                                                                                                                                                                                                                                                                                                                                                                                                                                                                                                                                                                                                                                                                                                                                                                                                                                                                                                                                                                                                                                                                                                                                                                                                                                                                                                                                                                                                                                                                                                                                                                                                                                                            | 2        | 3        | 4        | 5        |   |   |     |          |  |  |  |  |      |          |          |  |  |  |     |          |          |          |  |  |     |          |          |          |          |  |     |          |          |          |          |          |     |          |          |          |          |          |     |          |          |          |          |          |     |          |          |          |          |          |     |          |          |          |          |          |       |          |          |          |          |          |      |          |          |          |          |          |       |          |          |          |          |          |  |   |   |   |   |    |     |          |  |  |  |  |     |          |          |  |  |  |     |          |          |          |  |  |     |          |          |          |          |  |       |          |          |          |          |          |      |          |          |          |          |          |       |          |          |          |          |          |  |    |    |  |  |  |      |          |  |  |  |  |       |          |          |  |  |  |
| 1 B                                                                                                                             | 0.000000                                                                                                                                                                                                                                                                                                                                                                                                                                                                                                                                                                                                                                                                                                                                                                                                                                                                                                                                                                                                                                                                                                                                                                                                                                                                                                                                                                                                                                                                                                                                                                                                                                                                                                                                                                                                                                                                                                                                                                                                                                                                                                                                                                                                                                                                                                                                                                                                                     |          |          |          |          |   |   |     |          |  |  |  |  |      |          |          |  |  |  |     |          |          |          |  |  |     |          |          |          |          |  |     |          |          |          |          |          |     |          |          |          |          |          |     |          |          |          |          |          |     |          |          |          |          |          |     |          |          |          |          |          |       |          |          |          |          |          |      |          |          |          |          |          |       |          |          |          |          |          |  |   |   |   |   |    |     |          |  |  |  |  |     |          |          |  |  |  |     |          |          |          |  |  |     |          |          |          |          |  |       |          |          |          |          |          |      |          |          |          |          |          |       |          |          |          |          |          |  |    |    |  |  |  |      |          |  |  |  |  |       |          |          |  |  |  |
| 2 Os                                                                                                                            | 3.673748                                                                                                                                                                                                                                                                                                                                                                                                                                                                                                                                                                                                                                                                                                                                                                                                                                                                                                                                                                                                                                                                                                                                                                                                                                                                                                                                                                                                                                                                                                                                                                                                                                                                                                                                                                                                                                                                                                                                                                                                                                                                                                                                                                                                                                                                                                                                                                                                                     | 0.000000 |          |          |          |   |   |     |          |  |  |  |  |      |          |          |  |  |  |     |          |          |          |  |  |     |          |          |          |          |  |     |          |          |          |          |          |     |          |          |          |          |          |     |          |          |          |          |          |     |          |          |          |          |          |     |          |          |          |          |          |       |          |          |          |          |          |      |          |          |          |          |          |       |          |          |          |          |          |  |   |   |   |   |    |     |          |  |  |  |  |     |          |          |  |  |  |     |          |          |          |  |  |     |          |          |          |          |  |       |          |          |          |          |          |      |          |          |          |          |          |       |          |          |          |          |          |  |    |    |  |  |  |      |          |  |  |  |  |       |          |          |  |  |  |
| 3 B                                                                                                                             | 1.750179                                                                                                                                                                                                                                                                                                                                                                                                                                                                                                                                                                                                                                                                                                                                                                                                                                                                                                                                                                                                                                                                                                                                                                                                                                                                                                                                                                                                                                                                                                                                                                                                                                                                                                                                                                                                                                                                                                                                                                                                                                                                                                                                                                                                                                                                                                                                                                                                                     | 3.241934 | 0.000000 |          |          |   |   |     |          |  |  |  |  |      |          |          |  |  |  |     |          |          |          |  |  |     |          |          |          |          |  |     |          |          |          |          |          |     |          |          |          |          |          |     |          |          |          |          |          |     |          |          |          |          |          |     |          |          |          |          |          |       |          |          |          |          |          |      |          |          |          |          |          |       |          |          |          |          |          |  |   |   |   |   |    |     |          |  |  |  |  |     |          |          |  |  |  |     |          |          |          |  |  |     |          |          |          |          |  |       |          |          |          |          |          |      |          |          |          |          |          |       |          |          |          |          |          |  |    |    |  |  |  |      |          |  |  |  |  |       |          |          |  |  |  |
| 4 B                                                                                                                             | 1.785502                                                                                                                                                                                                                                                                                                                                                                                                                                                                                                                                                                                                                                                                                                                                                                                                                                                                                                                                                                                                                                                                                                                                                                                                                                                                                                                                                                                                                                                                                                                                                                                                                                                                                                                                                                                                                                                                                                                                                                                                                                                                                                                                                                                                                                                                                                                                                                                                                     | 3.347174 | 1.762035 | 0.000000 |          |   |   |     |          |  |  |  |  |      |          |          |  |  |  |     |          |          |          |  |  |     |          |          |          |          |  |     |          |          |          |          |          |     |          |          |          |          |          |     |          |          |          |          |          |     |          |          |          |          |          |     |          |          |          |          |          |       |          |          |          |          |          |      |          |          |          |          |          |       |          |          |          |          |          |  |   |   |   |   |    |     |          |  |  |  |  |     |          |          |  |  |  |     |          |          |          |  |  |     |          |          |          |          |  |       |          |          |          |          |          |      |          |          |          |          |          |       |          |          |          |          |          |  |    |    |  |  |  |      |          |  |  |  |  |       |          |          |  |  |  |
| 5 B                                                                                                                             | 2.915586                                                                                                                                                                                                                                                                                                                                                                                                                                                                                                                                                                                                                                                                                                                                                                                                                                                                                                                                                                                                                                                                                                                                                                                                                                                                                                                                                                                                                                                                                                                                                                                                                                                                                                                                                                                                                                                                                                                                                                                                                                                                                                                                                                                                                                                                                                                                                                                                                     | 2.243001 | 1.889600 | 1.762035 | 0.000000 |   |   |     |          |  |  |  |  |      |          |          |  |  |  |     |          |          |          |  |  |     |          |          |          |          |  |     |          |          |          |          |          |     |          |          |          |          |          |     |          |          |          |          |          |     |          |          |          |          |          |     |          |          |          |          |          |       |          |          |          |          |          |      |          |          |          |          |          |       |          |          |          |          |          |  |   |   |   |   |    |     |          |  |  |  |  |     |          |          |  |  |  |     |          |          |          |  |  |     |          |          |          |          |  |       |          |          |          |          |          |      |          |          |          |          |          |       |          |          |          |          |          |  |    |    |  |  |  |      |          |  |  |  |  |       |          |          |  |  |  |
| 6 B                                                                                                                             | 3.130472                                                                                                                                                                                                                                                                                                                                                                                                                                                                                                                                                                                                                                                                                                                                                                                                                                                                                                                                                                                                                                                                                                                                                                                                                                                                                                                                                                                                                                                                                                                                                                                                                                                                                                                                                                                                                                                                                                                                                                                                                                                                                                                                                                                                                                                                                                                                                                                                                     | 2.122477 | 1.862098 | 3.013429 | 1.862098 |   |   |     |          |  |  |  |  |      |          |          |  |  |  |     |          |          |          |  |  |     |          |          |          |          |  |     |          |          |          |          |          |     |          |          |          |          |          |     |          |          |          |          |          |     |          |          |          |          |          |     |          |          |          |          |          |       |          |          |          |          |          |      |          |          |          |          |          |       |          |          |          |          |          |  |   |   |   |   |    |     |          |  |  |  |  |     |          |          |  |  |  |     |          |          |          |  |  |     |          |          |          |          |  |       |          |          |          |          |          |      |          |          |          |          |          |       |          |          |          |          |          |  |    |    |  |  |  |      |          |  |  |  |  |       |          |          |  |  |  |
| 7 B                                                                                                                             | 1.757805                                                                                                                                                                                                                                                                                                                                                                                                                                                                                                                                                                                                                                                                                                                                                                                                                                                                                                                                                                                                                                                                                                                                                                                                                                                                                                                                                                                                                                                                                                                                                                                                                                                                                                                                                                                                                                                                                                                                                                                                                                                                                                                                                                                                                                                                                                                                                                                                                     | 3.257771 | 3.046244 | 2.933601 | 3.619548 |   |   |     |          |  |  |  |  |      |          |          |  |  |  |     |          |          |          |  |  |     |          |          |          |          |  |     |          |          |          |          |          |     |          |          |          |          |          |     |          |          |          |          |          |     |          |          |          |          |          |     |          |          |          |          |          |       |          |          |          |          |          |      |          |          |          |          |          |       |          |          |          |          |          |  |   |   |   |   |    |     |          |  |  |  |  |     |          |          |  |  |  |     |          |          |          |  |  |     |          |          |          |          |  |       |          |          |          |          |          |      |          |          |          |          |          |       |          |          |          |          |          |  |    |    |  |  |  |      |          |  |  |  |  |       |          |          |  |  |  |
| 8 B                                                                                                                             | 3.263181                                                                                                                                                                                                                                                                                                                                                                                                                                                                                                                                                                                                                                                                                                                                                                                                                                                                                                                                                                                                                                                                                                                                                                                                                                                                                                                                                                                                                                                                                                                                                                                                                                                                                                                                                                                                                                                                                                                                                                                                                                                                                                                                                                                                                                                                                                                                                                                                                     | 2.077975 | 3.631041 | 3.919267 | 3.631041 |   |   |     |          |  |  |  |  |      |          |          |  |  |  |     |          |          |          |  |  |     |          |          |          |          |  |     |          |          |          |          |          |     |          |          |          |          |          |     |          |          |          |          |          |     |          |          |          |          |          |     |          |          |          |          |          |       |          |          |          |          |          |      |          |          |          |          |          |       |          |          |          |          |          |  |   |   |   |   |    |     |          |  |  |  |  |     |          |          |  |  |  |     |          |          |          |  |  |     |          |          |          |          |  |       |          |          |          |          |          |      |          |          |          |          |          |       |          |          |          |          |          |  |    |    |  |  |  |      |          |  |  |  |  |       |          |          |  |  |  |
| 9 B                                                                                                                             | 1.825687                                                                                                                                                                                                                                                                                                                                                                                                                                                                                                                                                                                                                                                                                                                                                                                                                                                                                                                                                                                                                                                                                                                                                                                                                                                                                                                                                                                                                                                                                                                                                                                                                                                                                                                                                                                                                                                                                                                                                                                                                                                                                                                                                                                                                                                                                                                                                                                                                     | 3.316811 | 2.955961 | 1.836989 | 2.955961 |   |   |     |          |  |  |  |  |      |          |          |  |  |  |     |          |          |          |  |  |     |          |          |          |          |  |     |          |          |          |          |          |     |          |          |          |          |          |     |          |          |          |          |          |     |          |          |          |          |          |     |          |          |          |          |          |       |          |          |          |          |          |      |          |          |          |          |          |       |          |          |          |          |          |  |   |   |   |   |    |     |          |  |  |  |  |     |          |          |  |  |  |     |          |          |          |  |  |     |          |          |          |          |  |       |          |          |          |          |          |      |          |          |          |          |          |       |          |          |          |          |          |  |    |    |  |  |  |      |          |  |  |  |  |       |          |          |  |  |  |
| 10 B                                                                                                                            | 2.984885                                                                                                                                                                                                                                                                                                                                                                                                                                                                                                                                                                                                                                                                                                                                                                                                                                                                                                                                                                                                                                                                                                                                                                                                                                                                                                                                                                                                                                                                                                                                                                                                                                                                                                                                                                                                                                                                                                                                                                                                                                                                                                                                                                                                                                                                                                                                                                                                                     | 2.179202 | 3.619548 | 2.933601 | 3.046244 |   |   |     |          |  |  |  |  |      |          |          |  |  |  |     |          |          |          |  |  |     |          |          |          |          |  |     |          |          |          |          |          |     |          |          |          |          |          |     |          |          |          |          |          |     |          |          |          |          |          |     |          |          |          |          |          |       |          |          |          |          |          |      |          |          |          |          |          |       |          |          |          |          |          |  |   |   |   |   |    |     |          |  |  |  |  |     |          |          |  |  |  |     |          |          |          |  |  |     |          |          |          |          |  |       |          |          |          |          |          |      |          |          |          |          |          |       |          |          |          |          |          |  |    |    |  |  |  |      |          |  |  |  |  |       |          |          |  |  |  |
| 11 B                                                                                                                            | 2.877600                                                                                                                                                                                                                                                                                                                                                                                                                                                                                                                                                                                                                                                                                                                                                                                                                                                                                                                                                                                                                                                                                                                                                                                                                                                                                                                                                                                                                                                                                                                                                                                                                                                                                                                                                                                                                                                                                                                                                                                                                                                                                                                                                                                                                                                                                                                                                                                                                     | 2.269919 | 2.915586 | 1.785502 | 1.750179 |   |   |     |          |  |  |  |  |      |          |          |  |  |  |     |          |          |          |  |  |     |          |          |          |          |  |     |          |          |          |          |          |     |          |          |          |          |          |     |          |          |          |          |          |     |          |          |          |          |          |     |          |          |          |          |          |       |          |          |          |          |          |      |          |          |          |          |          |       |          |          |          |          |          |  |   |   |   |   |    |     |          |  |  |  |  |     |          |          |  |  |  |     |          |          |          |  |  |     |          |          |          |          |  |       |          |          |          |          |          |      |          |          |          |          |          |       |          |          |          |          |          |  |    |    |  |  |  |      |          |  |  |  |  |       |          |          |  |  |  |
| 12 Os                                                                                                                           | 2.269919                                                                                                                                                                                                                                                                                                                                                                                                                                                                                                                                                                                                                                                                                                                                                                                                                                                                                                                                                                                                                                                                                                                                                                                                                                                                                                                                                                                                                                                                                                                                                                                                                                                                                                                                                                                                                                                                                                                                                                                                                                                                                                                                                                                                                                                                                                                                                                                                                     | 2.899600 | 2.243001 | 3.347174 | 3.241934 |   |   |     |          |  |  |  |  |      |          |          |  |  |  |     |          |          |          |  |  |     |          |          |          |          |  |     |          |          |          |          |          |     |          |          |          |          |          |     |          |          |          |          |          |     |          |          |          |          |          |     |          |          |          |          |          |       |          |          |          |          |          |      |          |          |          |          |          |       |          |          |          |          |          |  |   |   |   |   |    |     |          |  |  |  |  |     |          |          |  |  |  |     |          |          |          |  |  |     |          |          |          |          |  |       |          |          |          |          |          |      |          |          |          |          |          |       |          |          |          |          |          |  |    |    |  |  |  |      |          |  |  |  |  |       |          |          |  |  |  |
|                                                                                                                                 | 6                                                                                                                                                                                                                                                                                                                                                                                                                                                                                                                                                                                                                                                                                                                                                                                                                                                                                                                                                                                                                                                                                                                                                                                                                                                                                                                                                                                                                                                                                                                                                                                                                                                                                                                                                                                                                                                                                                                                                                                                                                                                                                                                                                                                                                                                                                                                                                                                                            | 7        | 8        | 9        | 10       |   |   |     |          |  |  |  |  |      |          |          |  |  |  |     |          |          |          |  |  |     |          |          |          |          |  |     |          |          |          |          |          |     |          |          |          |          |          |     |          |          |          |          |          |     |          |          |          |          |          |     |          |          |          |          |          |       |          |          |          |          |          |      |          |          |          |          |          |       |          |          |          |          |          |  |   |   |   |   |    |     |          |  |  |  |  |     |          |          |  |  |  |     |          |          |          |  |  |     |          |          |          |          |  |       |          |          |          |          |          |      |          |          |          |          |          |       |          |          |          |          |          |  |    |    |  |  |  |      |          |  |  |  |  |       |          |          |  |  |  |
| 6 B                                                                                                                             | 0.000000                                                                                                                                                                                                                                                                                                                                                                                                                                                                                                                                                                                                                                                                                                                                                                                                                                                                                                                                                                                                                                                                                                                                                                                                                                                                                                                                                                                                                                                                                                                                                                                                                                                                                                                                                                                                                                                                                                                                                                                                                                                                                                                                                                                                                                                                                                                                                                                                                     |          |          |          |          |   |   |     |          |  |  |  |  |      |          |          |  |  |  |     |          |          |          |  |  |     |          |          |          |          |  |     |          |          |          |          |          |     |          |          |          |          |          |     |          |          |          |          |          |     |          |          |          |          |          |     |          |          |          |          |          |       |          |          |          |          |          |      |          |          |          |          |          |       |          |          |          |          |          |  |   |   |   |   |    |     |          |  |  |  |  |     |          |          |  |  |  |     |          |          |          |  |  |     |          |          |          |          |  |       |          |          |          |          |          |      |          |          |          |          |          |       |          |          |          |          |          |  |    |    |  |  |  |      |          |  |  |  |  |       |          |          |  |  |  |
| 7 B                                                                                                                             | 3.579029                                                                                                                                                                                                                                                                                                                                                                                                                                                                                                                                                                                                                                                                                                                                                                                                                                                                                                                                                                                                                                                                                                                                                                                                                                                                                                                                                                                                                                                                                                                                                                                                                                                                                                                                                                                                                                                                                                                                                                                                                                                                                                                                                                                                                                                                                                                                                                                                                     | 0.000000 |          |          |          |   |   |     |          |  |  |  |  |      |          |          |  |  |  |     |          |          |          |  |  |     |          |          |          |          |  |     |          |          |          |          |          |     |          |          |          |          |          |     |          |          |          |          |          |     |          |          |          |          |          |     |          |          |          |          |          |       |          |          |          |          |          |      |          |          |          |          |          |       |          |          |          |          |          |  |   |   |   |   |    |     |          |  |  |  |  |     |          |          |  |  |  |     |          |          |          |  |  |     |          |          |          |          |  |       |          |          |          |          |          |      |          |          |          |          |          |       |          |          |          |          |          |  |    |    |  |  |  |      |          |  |  |  |  |       |          |          |  |  |  |
| 8 B                                                                                                                             | 3.022897                                                                                                                                                                                                                                                                                                                                                                                                                                                                                                                                                                                                                                                                                                                                                                                                                                                                                                                                                                                                                                                                                                                                                                                                                                                                                                                                                                                                                                                                                                                                                                                                                                                                                                                                                                                                                                                                                                                                                                                                                                                                                                                                                                                                                                                                                                                                                                                                                     | 2.034710 | 0.000000 |          |          |   |   |     |          |  |  |  |  |      |          |          |  |  |  |     |          |          |          |  |  |     |          |          |          |          |  |     |          |          |          |          |          |     |          |          |          |          |          |     |          |          |          |          |          |     |          |          |          |          |          |     |          |          |          |          |          |       |          |          |          |          |          |      |          |          |          |          |          |       |          |          |          |          |          |  |   |   |   |   |    |     |          |  |  |  |  |     |          |          |  |  |  |     |          |          |          |  |  |     |          |          |          |          |  |       |          |          |          |          |          |      |          |          |          |          |          |       |          |          |          |          |          |  |    |    |  |  |  |      |          |  |  |  |  |       |          |          |  |  |  |
| 9 B                                                                                                                             | 3.815901                                                                                                                                                                                                                                                                                                                                                                                                                                                                                                                                                                                                                                                                                                                                                                                                                                                                                                                                                                                                                                                                                                                                                                                                                                                                                                                                                                                                                                                                                                                                                                                                                                                                                                                                                                                                                                                                                                                                                                                                                                                                                                                                                                                                                                                                                                                                                                                                                     | 1.746966 | 3.121104 | 0.000000 |          |   |   |     |          |  |  |  |  |      |          |          |  |  |  |     |          |          |          |  |  |     |          |          |          |          |  |     |          |          |          |          |          |     |          |          |          |          |          |     |          |          |          |          |          |     |          |          |          |          |          |     |          |          |          |          |          |       |          |          |          |          |          |      |          |          |          |          |          |       |          |          |          |          |          |  |   |   |   |   |    |     |          |  |  |  |  |     |          |          |  |  |  |     |          |          |          |  |  |     |          |          |          |          |  |       |          |          |          |          |          |      |          |          |          |          |          |       |          |          |          |          |          |  |    |    |  |  |  |      |          |  |  |  |  |       |          |          |  |  |  |
| 10 B                                                                                                                            | 3.579029                                                                                                                                                                                                                                                                                                                                                                                                                                                                                                                                                                                                                                                                                                                                                                                                                                                                                                                                                                                                                                                                                                                                                                                                                                                                                                                                                                                                                                                                                                                                                                                                                                                                                                                                                                                                                                                                                                                                                                                                                                                                                                                                                                                                                                                                                                                                                                                                                     | 2.022400 | 2.034710 | 1.746966 | 0.000000 |   |   |     |          |  |  |  |  |      |          |          |  |  |  |     |          |          |          |  |  |     |          |          |          |          |  |     |          |          |          |          |          |     |          |          |          |          |          |     |          |          |          |          |          |     |          |          |          |          |          |     |          |          |          |          |          |       |          |          |          |          |          |      |          |          |          |          |          |       |          |          |          |          |          |  |   |   |   |   |    |     |          |  |  |  |  |     |          |          |  |  |  |     |          |          |          |  |  |     |          |          |          |          |  |       |          |          |          |          |          |      |          |          |          |          |          |       |          |          |          |          |          |  |    |    |  |  |  |      |          |  |  |  |  |       |          |          |  |  |  |
| 11 B                                                                                                                            | 3.130472                                                                                                                                                                                                                                                                                                                                                                                                                                                                                                                                                                                                                                                                                                                                                                                                                                                                                                                                                                                                                                                                                                                                                                                                                                                                                                                                                                                                                                                                                                                                                                                                                                                                                                                                                                                                                                                                                                                                                                                                                                                                                                                                                                                                                                                                                                                                                                                                                     | 2.984885 | 3.263181 | 1.825687 | 1.757805 |   |   |     |          |  |  |  |  |      |          |          |  |  |  |     |          |          |          |  |  |     |          |          |          |          |  |     |          |          |          |          |          |     |          |          |          |          |          |     |          |          |          |          |          |     |          |          |          |          |          |     |          |          |          |          |          |       |          |          |          |          |          |      |          |          |          |          |          |       |          |          |          |          |          |  |   |   |   |   |    |     |          |  |  |  |  |     |          |          |  |  |  |     |          |          |          |  |  |     |          |          |          |          |  |       |          |          |          |          |          |      |          |          |          |          |          |       |          |          |          |          |          |  |    |    |  |  |  |      |          |  |  |  |  |       |          |          |  |  |  |
| 12 Os                                                                                                                           | 2.122477                                                                                                                                                                                                                                                                                                                                                                                                                                                                                                                                                                                                                                                                                                                                                                                                                                                                                                                                                                                                                                                                                                                                                                                                                                                                                                                                                                                                                                                                                                                                                                                                                                                                                                                                                                                                                                                                                                                                                                                                                                                                                                                                                                                                                                                                                                                                                                                                                     | 2.179202 | 2.077975 | 3.316811 | 3.257771 |   |   |     |          |  |  |  |  |      |          |          |  |  |  |     |          |          |          |  |  |     |          |          |          |          |  |     |          |          |          |          |          |     |          |          |          |          |          |     |          |          |          |          |          |     |          |          |          |          |          |     |          |          |          |          |          |       |          |          |          |          |          |      |          |          |          |          |          |       |          |          |          |          |          |  |   |   |   |   |    |     |          |  |  |  |  |     |          |          |  |  |  |     |          |          |          |  |  |     |          |          |          |          |  |       |          |          |          |          |          |      |          |          |          |          |          |       |          |          |          |          |          |  |    |    |  |  |  |      |          |  |  |  |  |       |          |          |  |  |  |
|                                                                                                                                 | 11                                                                                                                                                                                                                                                                                                                                                                                                                                                                                                                                                                                                                                                                                                                                                                                                                                                                                                                                                                                                                                                                                                                                                                                                                                                                                                                                                                                                                                                                                                                                                                                                                                                                                                                                                                                                                                                                                                                                                                                                                                                                                                                                                                                                                                                                                                                                                                                                                           | 12       |          |          |          |   |   |     |          |  |  |  |  |      |          |          |  |  |  |     |          |          |          |  |  |     |          |          |          |          |  |     |          |          |          |          |          |     |          |          |          |          |          |     |          |          |          |          |          |     |          |          |          |          |          |     |          |          |          |          |          |       |          |          |          |          |          |      |          |          |          |          |          |       |          |          |          |          |          |  |   |   |   |   |    |     |          |  |  |  |  |     |          |          |  |  |  |     |          |          |          |  |  |     |          |          |          |          |  |       |          |          |          |          |          |      |          |          |          |          |          |       |          |          |          |          |          |  |    |    |  |  |  |      |          |  |  |  |  |       |          |          |  |  |  |
| 11 B                                                                                                                            | 0.000000                                                                                                                                                                                                                                                                                                                                                                                                                                                                                                                                                                                                                                                                                                                                                                                                                                                                                                                                                                                                                                                                                                                                                                                                                                                                                                                                                                                                                                                                                                                                                                                                                                                                                                                                                                                                                                                                                                                                                                                                                                                                                                                                                                                                                                                                                                                                                                                                                     |          |          |          |          |   |   |     |          |  |  |  |  |      |          |          |  |  |  |     |          |          |          |  |  |     |          |          |          |          |  |     |          |          |          |          |          |     |          |          |          |          |          |     |          |          |          |          |          |     |          |          |          |          |          |     |          |          |          |          |          |       |          |          |          |          |          |      |          |          |          |          |          |       |          |          |          |          |          |  |   |   |   |   |    |     |          |  |  |  |  |     |          |          |  |  |  |     |          |          |          |  |  |     |          |          |          |          |  |       |          |          |          |          |          |      |          |          |          |          |          |       |          |          |          |          |          |  |    |    |  |  |  |      |          |  |  |  |  |       |          |          |  |  |  |
| 12 Os                                                                                                                           | 3.673748                                                                                                                                                                                                                                                                                                                                                                                                                                                                                                                                                                                                                                                                                                                                                                                                                                                                                                                                                                                                                                                                                                                                                                                                                                                                                                                                                                                                                                                                                                                                                                                                                                                                                                                                                                                                                                                                                                                                                                                                                                                                                                                                                                                                                                                                                                                                                                                                                     | 0.000000 |          |          |          |   |   |     |          |  |  |  |  |      |          |          |  |  |  |     |          |          |          |  |  |     |          |          |          |          |  |     |          |          |          |          |          |     |          |          |          |          |          |     |          |          |          |          |          |     |          |          |          |          |          |     |          |          |          |          |          |       |          |          |          |          |          |      |          |          |          |          |          |       |          |          |          |          |          |  |   |   |   |   |    |     |          |  |  |  |  |     |          |          |  |  |  |     |          |          |          |  |  |     |          |          |          |          |  |       |          |          |          |          |          |      |          |          |          |          |          |       |          |          |          |          |          |  |    |    |  |  |  |      |          |  |  |  |  |       |          |          |  |  |  |
|  <p>2. -823.23117850 +14.7 C<sub>2v</sub></p> | <table border="1"> <thead> <tr> <th></th> <th>1</th> <th>2</th> <th>3</th> <th>4</th> <th>5</th> </tr> </thead> <tbody> <tr><td>1 B</td><td>0.000000</td><td></td><td></td><td></td><td></td></tr> <tr><td>2 Os</td><td>3.993468</td><td>0.000000</td><td></td><td></td><td></td></tr> <tr><td>3 B</td><td>1.746222</td><td>3.449438</td><td>0.000000</td><td></td><td></td></tr> <tr><td>4 B</td><td>1.790792</td><td>3.445871</td><td>1.792802</td><td>0.000000</td><td></td></tr> <tr><td>5 B</td><td>2.937517</td><td>2.324948</td><td>2.937273</td><td>1.737144</td><td>0.000000</td></tr> <tr><td>6 B</td><td>2.892601</td><td>2.242634</td><td>1.787231</td><td>1.807228</td><td>1.862822</td></tr> <tr><td>7 B</td><td>1.791542</td><td>3.448106</td><td>1.790925</td><td>2.934736</td><td>3.561252</td></tr> <tr><td>8 B</td><td>2.937417</td><td>2.329102</td><td>2.935483</td><td>3.560894</td><td>3.293244</td></tr> <tr><td>9 B</td><td>1.787875</td><td>3.445941</td><td>2.890404</td><td>2.931189</td><td>3.074366</td></tr> <tr><td>10 Os</td><td>3.446866</td><td>2.307105</td><td>3.986115</td><td>3.441983</td><td>2.323352</td></tr> <tr><td>11 B</td><td>1.786093</td><td>3.444058</td><td>2.889877</td><td>1.803828</td><td>1.861258</td></tr> <tr><td>12 B</td><td>2.892059</td><td>2.242204</td><td>1.787271</td><td>2.933074</td><td>3.074186</td></tr> <tr> <td></td> <td>6</td> <td>7</td> <td>8</td> <td>9</td> <td>10</td> </tr> <tr><td>6 B</td><td>0.000000</td><td></td><td></td><td></td><td></td></tr> <tr><td>7 B</td><td>2.933477</td><td>0.000000</td><td></td><td></td><td></td></tr> <tr><td>8 B</td><td>3.075847</td><td>1.736434</td><td>0.000000</td><td></td><td></td></tr> <tr><td>9 B</td><td>3.473918</td><td>1.804351</td><td>1.860611</td><td>0.000000</td><td></td></tr> <tr><td>10 Os</td><td>3.441243</td><td>3.440456</td><td>2.321070</td><td>2.239279</td><td>0.000000</td></tr> <tr><td>11 B</td><td>2.959023</td><td>2.929704</td><td>3.072928</td><td>1.817124</td><td>2.240705</td></tr> <tr><td>12 B</td><td>1.819529</td><td>1.806236</td><td>1.859319</td><td>2.957129</td><td>3.436876</td></tr> <tr> <td></td> <td>11</td> <td>12</td> <td></td> <td></td> <td></td> </tr> <tr><td>11 B</td><td>0.000000</td><td></td><td></td><td></td><td></td></tr> <tr><td>12 B</td><td>3.470581</td><td>0.000000</td><td></td><td></td><td></td></tr> </tbody> </table>  |          | 1        | 2        | 3        | 4 | 5 | 1 B | 0.000000 |  |  |  |  | 2 Os | 3.993468 | 0.000000 |  |  |  | 3 B | 1.746222 | 3.449438 | 0.000000 |  |  | 4 B | 1.790792 | 3.445871 | 1.792802 | 0.000000 |  | 5 B | 2.937517 | 2.324948 | 2.937273 | 1.737144 | 0.000000 | 6 B | 2.892601 | 2.242634 | 1.787231 | 1.807228 | 1.862822 | 7 B | 1.791542 | 3.448106 | 1.790925 | 2.934736 | 3.561252 | 8 B | 2.937417 | 2.329102 | 2.935483 | 3.560894 | 3.293244 | 9 B | 1.787875 | 3.445941 | 2.890404 | 2.931189 | 3.074366 | 10 Os | 3.446866 | 2.307105 | 3.986115 | 3.441983 | 2.323352 | 11 B | 1.786093 | 3.444058 | 2.889877 | 1.803828 | 1.861258 | 12 B  | 2.892059 | 2.242204 | 1.787271 | 2.933074 | 3.074186 |  | 6 | 7 | 8 | 9 | 10 | 6 B | 0.000000 |  |  |  |  | 7 B | 2.933477 | 0.000000 |  |  |  | 8 B | 3.075847 | 1.736434 | 0.000000 |  |  | 9 B | 3.473918 | 1.804351 | 1.860611 | 0.000000 |  | 10 Os | 3.441243 | 3.440456 | 2.321070 | 2.239279 | 0.000000 | 11 B | 2.959023 | 2.929704 | 3.072928 | 1.817124 | 2.240705 | 12 B  | 1.819529 | 1.806236 | 1.859319 | 2.957129 | 3.436876 |  | 11 | 12 |  |  |  | 11 B | 0.000000 |  |  |  |  | 12 B  | 3.470581 | 0.000000 |  |  |  |
|                                                                                                                                 | 1                                                                                                                                                                                                                                                                                                                                                                                                                                                                                                                                                                                                                                                                                                                                                                                                                                                                                                                                                                                                                                                                                                                                                                                                                                                                                                                                                                                                                                                                                                                                                                                                                                                                                                                                                                                                                                                                                                                                                                                                                                                                                                                                                                                                                                                                                                                                                                                                                            | 2        | 3        | 4        | 5        |   |   |     |          |  |  |  |  |      |          |          |  |  |  |     |          |          |          |  |  |     |          |          |          |          |  |     |          |          |          |          |          |     |          |          |          |          |          |     |          |          |          |          |          |     |          |          |          |          |          |     |          |          |          |          |          |       |          |          |          |          |          |      |          |          |          |          |          |       |          |          |          |          |          |  |   |   |   |   |    |     |          |  |  |  |  |     |          |          |  |  |  |     |          |          |          |  |  |     |          |          |          |          |  |       |          |          |          |          |          |      |          |          |          |          |          |       |          |          |          |          |          |  |    |    |  |  |  |      |          |  |  |  |  |       |          |          |  |  |  |
| 1 B                                                                                                                             | 0.000000                                                                                                                                                                                                                                                                                                                                                                                                                                                                                                                                                                                                                                                                                                                                                                                                                                                                                                                                                                                                                                                                                                                                                                                                                                                                                                                                                                                                                                                                                                                                                                                                                                                                                                                                                                                                                                                                                                                                                                                                                                                                                                                                                                                                                                                                                                                                                                                                                     |          |          |          |          |   |   |     |          |  |  |  |  |      |          |          |  |  |  |     |          |          |          |  |  |     |          |          |          |          |  |     |          |          |          |          |          |     |          |          |          |          |          |     |          |          |          |          |          |     |          |          |          |          |          |     |          |          |          |          |          |       |          |          |          |          |          |      |          |          |          |          |          |       |          |          |          |          |          |  |   |   |   |   |    |     |          |  |  |  |  |     |          |          |  |  |  |     |          |          |          |  |  |     |          |          |          |          |  |       |          |          |          |          |          |      |          |          |          |          |          |       |          |          |          |          |          |  |    |    |  |  |  |      |          |  |  |  |  |       |          |          |  |  |  |
| 2 Os                                                                                                                            | 3.993468                                                                                                                                                                                                                                                                                                                                                                                                                                                                                                                                                                                                                                                                                                                                                                                                                                                                                                                                                                                                                                                                                                                                                                                                                                                                                                                                                                                                                                                                                                                                                                                                                                                                                                                                                                                                                                                                                                                                                                                                                                                                                                                                                                                                                                                                                                                                                                                                                     | 0.000000 |          |          |          |   |   |     |          |  |  |  |  |      |          |          |  |  |  |     |          |          |          |  |  |     |          |          |          |          |  |     |          |          |          |          |          |     |          |          |          |          |          |     |          |          |          |          |          |     |          |          |          |          |          |     |          |          |          |          |          |       |          |          |          |          |          |      |          |          |          |          |          |       |          |          |          |          |          |  |   |   |   |   |    |     |          |  |  |  |  |     |          |          |  |  |  |     |          |          |          |  |  |     |          |          |          |          |  |       |          |          |          |          |          |      |          |          |          |          |          |       |          |          |          |          |          |  |    |    |  |  |  |      |          |  |  |  |  |       |          |          |  |  |  |
| 3 B                                                                                                                             | 1.746222                                                                                                                                                                                                                                                                                                                                                                                                                                                                                                                                                                                                                                                                                                                                                                                                                                                                                                                                                                                                                                                                                                                                                                                                                                                                                                                                                                                                                                                                                                                                                                                                                                                                                                                                                                                                                                                                                                                                                                                                                                                                                                                                                                                                                                                                                                                                                                                                                     | 3.449438 | 0.000000 |          |          |   |   |     |          |  |  |  |  |      |          |          |  |  |  |     |          |          |          |  |  |     |          |          |          |          |  |     |          |          |          |          |          |     |          |          |          |          |          |     |          |          |          |          |          |     |          |          |          |          |          |     |          |          |          |          |          |       |          |          |          |          |          |      |          |          |          |          |          |       |          |          |          |          |          |  |   |   |   |   |    |     |          |  |  |  |  |     |          |          |  |  |  |     |          |          |          |  |  |     |          |          |          |          |  |       |          |          |          |          |          |      |          |          |          |          |          |       |          |          |          |          |          |  |    |    |  |  |  |      |          |  |  |  |  |       |          |          |  |  |  |
| 4 B                                                                                                                             | 1.790792                                                                                                                                                                                                                                                                                                                                                                                                                                                                                                                                                                                                                                                                                                                                                                                                                                                                                                                                                                                                                                                                                                                                                                                                                                                                                                                                                                                                                                                                                                                                                                                                                                                                                                                                                                                                                                                                                                                                                                                                                                                                                                                                                                                                                                                                                                                                                                                                                     | 3.445871 | 1.792802 | 0.000000 |          |   |   |     |          |  |  |  |  |      |          |          |  |  |  |     |          |          |          |  |  |     |          |          |          |          |  |     |          |          |          |          |          |     |          |          |          |          |          |     |          |          |          |          |          |     |          |          |          |          |          |     |          |          |          |          |          |       |          |          |          |          |          |      |          |          |          |          |          |       |          |          |          |          |          |  |   |   |   |   |    |     |          |  |  |  |  |     |          |          |  |  |  |     |          |          |          |  |  |     |          |          |          |          |  |       |          |          |          |          |          |      |          |          |          |          |          |       |          |          |          |          |          |  |    |    |  |  |  |      |          |  |  |  |  |       |          |          |  |  |  |
| 5 B                                                                                                                             | 2.937517                                                                                                                                                                                                                                                                                                                                                                                                                                                                                                                                                                                                                                                                                                                                                                                                                                                                                                                                                                                                                                                                                                                                                                                                                                                                                                                                                                                                                                                                                                                                                                                                                                                                                                                                                                                                                                                                                                                                                                                                                                                                                                                                                                                                                                                                                                                                                                                                                     | 2.324948 | 2.937273 | 1.737144 | 0.000000 |   |   |     |          |  |  |  |  |      |          |          |  |  |  |     |          |          |          |  |  |     |          |          |          |          |  |     |          |          |          |          |          |     |          |          |          |          |          |     |          |          |          |          |          |     |          |          |          |          |          |     |          |          |          |          |          |       |          |          |          |          |          |      |          |          |          |          |          |       |          |          |          |          |          |  |   |   |   |   |    |     |          |  |  |  |  |     |          |          |  |  |  |     |          |          |          |  |  |     |          |          |          |          |  |       |          |          |          |          |          |      |          |          |          |          |          |       |          |          |          |          |          |  |    |    |  |  |  |      |          |  |  |  |  |       |          |          |  |  |  |
| 6 B                                                                                                                             | 2.892601                                                                                                                                                                                                                                                                                                                                                                                                                                                                                                                                                                                                                                                                                                                                                                                                                                                                                                                                                                                                                                                                                                                                                                                                                                                                                                                                                                                                                                                                                                                                                                                                                                                                                                                                                                                                                                                                                                                                                                                                                                                                                                                                                                                                                                                                                                                                                                                                                     | 2.242634 | 1.787231 | 1.807228 | 1.862822 |   |   |     |          |  |  |  |  |      |          |          |  |  |  |     |          |          |          |  |  |     |          |          |          |          |  |     |          |          |          |          |          |     |          |          |          |          |          |     |          |          |          |          |          |     |          |          |          |          |          |     |          |          |          |          |          |       |          |          |          |          |          |      |          |          |          |          |          |       |          |          |          |          |          |  |   |   |   |   |    |     |          |  |  |  |  |     |          |          |  |  |  |     |          |          |          |  |  |     |          |          |          |          |  |       |          |          |          |          |          |      |          |          |          |          |          |       |          |          |          |          |          |  |    |    |  |  |  |      |          |  |  |  |  |       |          |          |  |  |  |
| 7 B                                                                                                                             | 1.791542                                                                                                                                                                                                                                                                                                                                                                                                                                                                                                                                                                                                                                                                                                                                                                                                                                                                                                                                                                                                                                                                                                                                                                                                                                                                                                                                                                                                                                                                                                                                                                                                                                                                                                                                                                                                                                                                                                                                                                                                                                                                                                                                                                                                                                                                                                                                                                                                                     | 3.448106 | 1.790925 | 2.934736 | 3.561252 |   |   |     |          |  |  |  |  |      |          |          |  |  |  |     |          |          |          |  |  |     |          |          |          |          |  |     |          |          |          |          |          |     |          |          |          |          |          |     |          |          |          |          |          |     |          |          |          |          |          |     |          |          |          |          |          |       |          |          |          |          |          |      |          |          |          |          |          |       |          |          |          |          |          |  |   |   |   |   |    |     |          |  |  |  |  |     |          |          |  |  |  |     |          |          |          |  |  |     |          |          |          |          |  |       |          |          |          |          |          |      |          |          |          |          |          |       |          |          |          |          |          |  |    |    |  |  |  |      |          |  |  |  |  |       |          |          |  |  |  |
| 8 B                                                                                                                             | 2.937417                                                                                                                                                                                                                                                                                                                                                                                                                                                                                                                                                                                                                                                                                                                                                                                                                                                                                                                                                                                                                                                                                                                                                                                                                                                                                                                                                                                                                                                                                                                                                                                                                                                                                                                                                                                                                                                                                                                                                                                                                                                                                                                                                                                                                                                                                                                                                                                                                     | 2.329102 | 2.935483 | 3.560894 | 3.293244 |   |   |     |          |  |  |  |  |      |          |          |  |  |  |     |          |          |          |  |  |     |          |          |          |          |  |     |          |          |          |          |          |     |          |          |          |          |          |     |          |          |          |          |          |     |          |          |          |          |          |     |          |          |          |          |          |       |          |          |          |          |          |      |          |          |          |          |          |       |          |          |          |          |          |  |   |   |   |   |    |     |          |  |  |  |  |     |          |          |  |  |  |     |          |          |          |  |  |     |          |          |          |          |  |       |          |          |          |          |          |      |          |          |          |          |          |       |          |          |          |          |          |  |    |    |  |  |  |      |          |  |  |  |  |       |          |          |  |  |  |
| 9 B                                                                                                                             | 1.787875                                                                                                                                                                                                                                                                                                                                                                                                                                                                                                                                                                                                                                                                                                                                                                                                                                                                                                                                                                                                                                                                                                                                                                                                                                                                                                                                                                                                                                                                                                                                                                                                                                                                                                                                                                                                                                                                                                                                                                                                                                                                                                                                                                                                                                                                                                                                                                                                                     | 3.445941 | 2.890404 | 2.931189 | 3.074366 |   |   |     |          |  |  |  |  |      |          |          |  |  |  |     |          |          |          |  |  |     |          |          |          |          |  |     |          |          |          |          |          |     |          |          |          |          |          |     |          |          |          |          |          |     |          |          |          |          |          |     |          |          |          |          |          |       |          |          |          |          |          |      |          |          |          |          |          |       |          |          |          |          |          |  |   |   |   |   |    |     |          |  |  |  |  |     |          |          |  |  |  |     |          |          |          |  |  |     |          |          |          |          |  |       |          |          |          |          |          |      |          |          |          |          |          |       |          |          |          |          |          |  |    |    |  |  |  |      |          |  |  |  |  |       |          |          |  |  |  |
| 10 Os                                                                                                                           | 3.446866                                                                                                                                                                                                                                                                                                                                                                                                                                                                                                                                                                                                                                                                                                                                                                                                                                                                                                                                                                                                                                                                                                                                                                                                                                                                                                                                                                                                                                                                                                                                                                                                                                                                                                                                                                                                                                                                                                                                                                                                                                                                                                                                                                                                                                                                                                                                                                                                                     | 2.307105 | 3.986115 | 3.441983 | 2.323352 |   |   |     |          |  |  |  |  |      |          |          |  |  |  |     |          |          |          |  |  |     |          |          |          |          |  |     |          |          |          |          |          |     |          |          |          |          |          |     |          |          |          |          |          |     |          |          |          |          |          |     |          |          |          |          |          |       |          |          |          |          |          |      |          |          |          |          |          |       |          |          |          |          |          |  |   |   |   |   |    |     |          |  |  |  |  |     |          |          |  |  |  |     |          |          |          |  |  |     |          |          |          |          |  |       |          |          |          |          |          |      |          |          |          |          |          |       |          |          |          |          |          |  |    |    |  |  |  |      |          |  |  |  |  |       |          |          |  |  |  |
| 11 B                                                                                                                            | 1.786093                                                                                                                                                                                                                                                                                                                                                                                                                                                                                                                                                                                                                                                                                                                                                                                                                                                                                                                                                                                                                                                                                                                                                                                                                                                                                                                                                                                                                                                                                                                                                                                                                                                                                                                                                                                                                                                                                                                                                                                                                                                                                                                                                                                                                                                                                                                                                                                                                     | 3.444058 | 2.889877 | 1.803828 | 1.861258 |   |   |     |          |  |  |  |  |      |          |          |  |  |  |     |          |          |          |  |  |     |          |          |          |          |  |     |          |          |          |          |          |     |          |          |          |          |          |     |          |          |          |          |          |     |          |          |          |          |          |     |          |          |          |          |          |       |          |          |          |          |          |      |          |          |          |          |          |       |          |          |          |          |          |  |   |   |   |   |    |     |          |  |  |  |  |     |          |          |  |  |  |     |          |          |          |  |  |     |          |          |          |          |  |       |          |          |          |          |          |      |          |          |          |          |          |       |          |          |          |          |          |  |    |    |  |  |  |      |          |  |  |  |  |       |          |          |  |  |  |
| 12 B                                                                                                                            | 2.892059                                                                                                                                                                                                                                                                                                                                                                                                                                                                                                                                                                                                                                                                                                                                                                                                                                                                                                                                                                                                                                                                                                                                                                                                                                                                                                                                                                                                                                                                                                                                                                                                                                                                                                                                                                                                                                                                                                                                                                                                                                                                                                                                                                                                                                                                                                                                                                                                                     | 2.242204 | 1.787271 | 2.933074 | 3.074186 |   |   |     |          |  |  |  |  |      |          |          |  |  |  |     |          |          |          |  |  |     |          |          |          |          |  |     |          |          |          |          |          |     |          |          |          |          |          |     |          |          |          |          |          |     |          |          |          |          |          |     |          |          |          |          |          |       |          |          |          |          |          |      |          |          |          |          |          |       |          |          |          |          |          |  |   |   |   |   |    |     |          |  |  |  |  |     |          |          |  |  |  |     |          |          |          |  |  |     |          |          |          |          |  |       |          |          |          |          |          |      |          |          |          |          |          |       |          |          |          |          |          |  |    |    |  |  |  |      |          |  |  |  |  |       |          |          |  |  |  |
|                                                                                                                                 | 6                                                                                                                                                                                                                                                                                                                                                                                                                                                                                                                                                                                                                                                                                                                                                                                                                                                                                                                                                                                                                                                                                                                                                                                                                                                                                                                                                                                                                                                                                                                                                                                                                                                                                                                                                                                                                                                                                                                                                                                                                                                                                                                                                                                                                                                                                                                                                                                                                            | 7        | 8        | 9        | 10       |   |   |     |          |  |  |  |  |      |          |          |  |  |  |     |          |          |          |  |  |     |          |          |          |          |  |     |          |          |          |          |          |     |          |          |          |          |          |     |          |          |          |          |          |     |          |          |          |          |          |     |          |          |          |          |          |       |          |          |          |          |          |      |          |          |          |          |          |       |          |          |          |          |          |  |   |   |   |   |    |     |          |  |  |  |  |     |          |          |  |  |  |     |          |          |          |  |  |     |          |          |          |          |  |       |          |          |          |          |          |      |          |          |          |          |          |       |          |          |          |          |          |  |    |    |  |  |  |      |          |  |  |  |  |       |          |          |  |  |  |
| 6 B                                                                                                                             | 0.000000                                                                                                                                                                                                                                                                                                                                                                                                                                                                                                                                                                                                                                                                                                                                                                                                                                                                                                                                                                                                                                                                                                                                                                                                                                                                                                                                                                                                                                                                                                                                                                                                                                                                                                                                                                                                                                                                                                                                                                                                                                                                                                                                                                                                                                                                                                                                                                                                                     |          |          |          |          |   |   |     |          |  |  |  |  |      |          |          |  |  |  |     |          |          |          |  |  |     |          |          |          |          |  |     |          |          |          |          |          |     |          |          |          |          |          |     |          |          |          |          |          |     |          |          |          |          |          |     |          |          |          |          |          |       |          |          |          |          |          |      |          |          |          |          |          |       |          |          |          |          |          |  |   |   |   |   |    |     |          |  |  |  |  |     |          |          |  |  |  |     |          |          |          |  |  |     |          |          |          |          |  |       |          |          |          |          |          |      |          |          |          |          |          |       |          |          |          |          |          |  |    |    |  |  |  |      |          |  |  |  |  |       |          |          |  |  |  |
| 7 B                                                                                                                             | 2.933477                                                                                                                                                                                                                                                                                                                                                                                                                                                                                                                                                                                                                                                                                                                                                                                                                                                                                                                                                                                                                                                                                                                                                                                                                                                                                                                                                                                                                                                                                                                                                                                                                                                                                                                                                                                                                                                                                                                                                                                                                                                                                                                                                                                                                                                                                                                                                                                                                     | 0.000000 |          |          |          |   |   |     |          |  |  |  |  |      |          |          |  |  |  |     |          |          |          |  |  |     |          |          |          |          |  |     |          |          |          |          |          |     |          |          |          |          |          |     |          |          |          |          |          |     |          |          |          |          |          |     |          |          |          |          |          |       |          |          |          |          |          |      |          |          |          |          |          |       |          |          |          |          |          |  |   |   |   |   |    |     |          |  |  |  |  |     |          |          |  |  |  |     |          |          |          |  |  |     |          |          |          |          |  |       |          |          |          |          |          |      |          |          |          |          |          |       |          |          |          |          |          |  |    |    |  |  |  |      |          |  |  |  |  |       |          |          |  |  |  |
| 8 B                                                                                                                             | 3.075847                                                                                                                                                                                                                                                                                                                                                                                                                                                                                                                                                                                                                                                                                                                                                                                                                                                                                                                                                                                                                                                                                                                                                                                                                                                                                                                                                                                                                                                                                                                                                                                                                                                                                                                                                                                                                                                                                                                                                                                                                                                                                                                                                                                                                                                                                                                                                                                                                     | 1.736434 | 0.000000 |          |          |   |   |     |          |  |  |  |  |      |          |          |  |  |  |     |          |          |          |  |  |     |          |          |          |          |  |     |          |          |          |          |          |     |          |          |          |          |          |     |          |          |          |          |          |     |          |          |          |          |          |     |          |          |          |          |          |       |          |          |          |          |          |      |          |          |          |          |          |       |          |          |          |          |          |  |   |   |   |   |    |     |          |  |  |  |  |     |          |          |  |  |  |     |          |          |          |  |  |     |          |          |          |          |  |       |          |          |          |          |          |      |          |          |          |          |          |       |          |          |          |          |          |  |    |    |  |  |  |      |          |  |  |  |  |       |          |          |  |  |  |
| 9 B                                                                                                                             | 3.473918                                                                                                                                                                                                                                                                                                                                                                                                                                                                                                                                                                                                                                                                                                                                                                                                                                                                                                                                                                                                                                                                                                                                                                                                                                                                                                                                                                                                                                                                                                                                                                                                                                                                                                                                                                                                                                                                                                                                                                                                                                                                                                                                                                                                                                                                                                                                                                                                                     | 1.804351 | 1.860611 | 0.000000 |          |   |   |     |          |  |  |  |  |      |          |          |  |  |  |     |          |          |          |  |  |     |          |          |          |          |  |     |          |          |          |          |          |     |          |          |          |          |          |     |          |          |          |          |          |     |          |          |          |          |          |     |          |          |          |          |          |       |          |          |          |          |          |      |          |          |          |          |          |       |          |          |          |          |          |  |   |   |   |   |    |     |          |  |  |  |  |     |          |          |  |  |  |     |          |          |          |  |  |     |          |          |          |          |  |       |          |          |          |          |          |      |          |          |          |          |          |       |          |          |          |          |          |  |    |    |  |  |  |      |          |  |  |  |  |       |          |          |  |  |  |
| 10 Os                                                                                                                           | 3.441243                                                                                                                                                                                                                                                                                                                                                                                                                                                                                                                                                                                                                                                                                                                                                                                                                                                                                                                                                                                                                                                                                                                                                                                                                                                                                                                                                                                                                                                                                                                                                                                                                                                                                                                                                                                                                                                                                                                                                                                                                                                                                                                                                                                                                                                                                                                                                                                                                     | 3.440456 | 2.321070 | 2.239279 | 0.000000 |   |   |     |          |  |  |  |  |      |          |          |  |  |  |     |          |          |          |  |  |     |          |          |          |          |  |     |          |          |          |          |          |     |          |          |          |          |          |     |          |          |          |          |          |     |          |          |          |          |          |     |          |          |          |          |          |       |          |          |          |          |          |      |          |          |          |          |          |       |          |          |          |          |          |  |   |   |   |   |    |     |          |  |  |  |  |     |          |          |  |  |  |     |          |          |          |  |  |     |          |          |          |          |  |       |          |          |          |          |          |      |          |          |          |          |          |       |          |          |          |          |          |  |    |    |  |  |  |      |          |  |  |  |  |       |          |          |  |  |  |
| 11 B                                                                                                                            | 2.959023                                                                                                                                                                                                                                                                                                                                                                                                                                                                                                                                                                                                                                                                                                                                                                                                                                                                                                                                                                                                                                                                                                                                                                                                                                                                                                                                                                                                                                                                                                                                                                                                                                                                                                                                                                                                                                                                                                                                                                                                                                                                                                                                                                                                                                                                                                                                                                                                                     | 2.929704 | 3.072928 | 1.817124 | 2.240705 |   |   |     |          |  |  |  |  |      |          |          |  |  |  |     |          |          |          |  |  |     |          |          |          |          |  |     |          |          |          |          |          |     |          |          |          |          |          |     |          |          |          |          |          |     |          |          |          |          |          |     |          |          |          |          |          |       |          |          |          |          |          |      |          |          |          |          |          |       |          |          |          |          |          |  |   |   |   |   |    |     |          |  |  |  |  |     |          |          |  |  |  |     |          |          |          |  |  |     |          |          |          |          |  |       |          |          |          |          |          |      |          |          |          |          |          |       |          |          |          |          |          |  |    |    |  |  |  |      |          |  |  |  |  |       |          |          |  |  |  |
| 12 B                                                                                                                            | 1.819529                                                                                                                                                                                                                                                                                                                                                                                                                                                                                                                                                                                                                                                                                                                                                                                                                                                                                                                                                                                                                                                                                                                                                                                                                                                                                                                                                                                                                                                                                                                                                                                                                                                                                                                                                                                                                                                                                                                                                                                                                                                                                                                                                                                                                                                                                                                                                                                                                     | 1.806236 | 1.859319 | 2.957129 | 3.436876 |   |   |     |          |  |  |  |  |      |          |          |  |  |  |     |          |          |          |  |  |     |          |          |          |          |  |     |          |          |          |          |          |     |          |          |          |          |          |     |          |          |          |          |          |     |          |          |          |          |          |     |          |          |          |          |          |       |          |          |          |          |          |      |          |          |          |          |          |       |          |          |          |          |          |  |   |   |   |   |    |     |          |  |  |  |  |     |          |          |  |  |  |     |          |          |          |  |  |     |          |          |          |          |  |       |          |          |          |          |          |      |          |          |          |          |          |       |          |          |          |          |          |  |    |    |  |  |  |      |          |  |  |  |  |       |          |          |  |  |  |
|                                                                                                                                 | 11                                                                                                                                                                                                                                                                                                                                                                                                                                                                                                                                                                                                                                                                                                                                                                                                                                                                                                                                                                                                                                                                                                                                                                                                                                                                                                                                                                                                                                                                                                                                                                                                                                                                                                                                                                                                                                                                                                                                                                                                                                                                                                                                                                                                                                                                                                                                                                                                                           | 12       |          |          |          |   |   |     |          |  |  |  |  |      |          |          |  |  |  |     |          |          |          |  |  |     |          |          |          |          |  |     |          |          |          |          |          |     |          |          |          |          |          |     |          |          |          |          |          |     |          |          |          |          |          |     |          |          |          |          |          |       |          |          |          |          |          |      |          |          |          |          |          |       |          |          |          |          |          |  |   |   |   |   |    |     |          |  |  |  |  |     |          |          |  |  |  |     |          |          |          |  |  |     |          |          |          |          |  |       |          |          |          |          |          |      |          |          |          |          |          |       |          |          |          |          |          |  |    |    |  |  |  |      |          |  |  |  |  |       |          |          |  |  |  |
| 11 B                                                                                                                            | 0.000000                                                                                                                                                                                                                                                                                                                                                                                                                                                                                                                                                                                                                                                                                                                                                                                                                                                                                                                                                                                                                                                                                                                                                                                                                                                                                                                                                                                                                                                                                                                                                                                                                                                                                                                                                                                                                                                                                                                                                                                                                                                                                                                                                                                                                                                                                                                                                                                                                     |          |          |          |          |   |   |     |          |  |  |  |  |      |          |          |  |  |  |     |          |          |          |  |  |     |          |          |          |          |  |     |          |          |          |          |          |     |          |          |          |          |          |     |          |          |          |          |          |     |          |          |          |          |          |     |          |          |          |          |          |       |          |          |          |          |          |      |          |          |          |          |          |       |          |          |          |          |          |  |   |   |   |   |    |     |          |  |  |  |  |     |          |          |  |  |  |     |          |          |          |  |  |     |          |          |          |          |  |       |          |          |          |          |          |      |          |          |          |          |          |       |          |          |          |          |          |  |    |    |  |  |  |      |          |  |  |  |  |       |          |          |  |  |  |
| 12 B                                                                                                                            | 3.470581                                                                                                                                                                                                                                                                                                                                                                                                                                                                                                                                                                                                                                                                                                                                                                                                                                                                                                                                                                                                                                                                                                                                                                                                                                                                                                                                                                                                                                                                                                                                                                                                                                                                                                                                                                                                                                                                                                                                                                                                                                                                                                                                                                                                                                                                                                                                                                                                                     | 0.000000 |          |          |          |   |   |     |          |  |  |  |  |      |          |          |  |  |  |     |          |          |          |  |  |     |          |          |          |          |  |     |          |          |          |          |          |     |          |          |          |          |          |     |          |          |          |          |          |     |          |          |          |          |          |     |          |          |          |          |          |       |          |          |          |          |          |      |          |          |          |          |          |       |          |          |          |          |          |  |   |   |   |   |    |     |          |  |  |  |  |     |          |          |  |  |  |     |          |          |          |  |  |     |          |          |          |          |  |       |          |          |          |          |          |      |          |          |          |          |          |       |          |          |          |          |          |  |    |    |  |  |  |      |          |  |  |  |  |       |          |          |  |  |  |



| 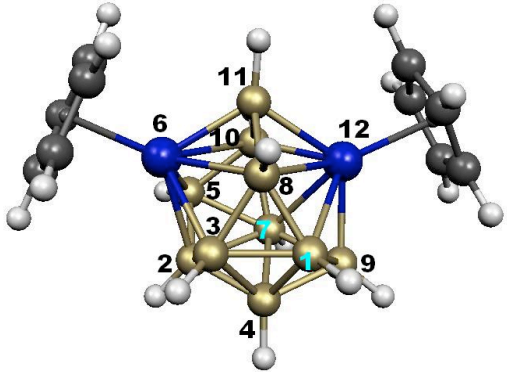 <p>3. -823.22763413 +16.9</p>  | <table border="1"> <thead> <tr> <th></th> <th>1</th> <th>2</th> <th>3</th> <th>4</th> <th>5</th> </tr> </thead> <tbody> <tr><td>1 B</td><td>0.000000</td><td></td><td></td><td></td><td></td></tr> <tr><td>2 B</td><td>2.887300</td><td>0.000000</td><td></td><td></td><td></td></tr> <tr><td>3 B</td><td>1.850623</td><td>1.758452</td><td>0.000000</td><td></td><td></td></tr> <tr><td>4 B</td><td>1.782467</td><td>1.705919</td><td>1.823705</td><td>0.000000</td><td></td></tr> <tr><td>5 B</td><td>3.896753</td><td>1.743819</td><td>3.050327</td><td>3.084181</td><td>0.000000</td></tr> <tr><td>6 Os</td><td>3.497478</td><td>2.275134</td><td>2.245568</td><td>3.448836</td><td>2.072886</td></tr> <tr><td>7 B</td><td>2.808535</td><td>1.926235</td><td>2.891557</td><td>1.980928</td><td>1.888812</td></tr> <tr><td>8 B</td><td>1.752069</td><td>3.001806</td><td>1.790970</td><td>2.888214</td><td>3.501432</td></tr> <tr><td>9 B</td><td>1.770649</td><td>2.996240</td><td>2.996165</td><td>1.739070</td><td>3.648858</td></tr> <tr><td>10 B</td><td>3.427484</td><td>2.789832</td><td>3.319347</td><td>3.380859</td><td>1.775610</td></tr> <tr><td>11 B</td><td>3.157186</td><td>3.488375</td><td>3.073001</td><td>3.890039</td><td>3.041781</td></tr> <tr><td>12 Os</td><td>2.302931</td><td>3.626409</td><td>3.354854</td><td>3.144561</td><td>3.549847</td></tr> <tr> <th></th> <th>6</th> <th>7</th> <th>8</th> <th>9</th> <th>10</th> </tr> <tr><td>6 Os</td><td>0.000000</td><td></td><td></td><td></td><td></td></tr> <tr><td>7 B</td><td>3.136681</td><td>0.000000</td><td></td><td></td><td></td></tr> <tr><td>8 B</td><td>2.320405</td><td>3.204330</td><td>0.000000</td><td></td><td></td></tr> <tr><td>9 B</td><td>4.177124</td><td>1.898062</td><td>3.043597</td><td>0.000000</td><td></td></tr> <tr><td>10 B</td><td>2.372539</td><td>1.876151</td><td>2.825429</td><td>3.130857</td><td>0.000000</td></tr> <tr><td>11 B</td><td>2.091822</td><td>3.202361</td><td>1.768497</td><td>3.709874</td><td>1.813190</td></tr> <tr><td>12 Os</td><td>3.587241</td><td>2.433189</td><td>2.305713</td><td>2.048787</td><td>2.137503</td></tr> <tr> <th></th> <th>11</th> <th>12</th> </tr> <tr><td>11 B</td><td>0.000000</td><td></td></tr> <tr><td>12 Os</td><td>2.172471</td><td>0.000000</td></tr> </tbody> </table> |          | 1        | 2        | 3        | 4 | 5 | 1 B | 0.000000 |  |  |  |  | 2 B | 2.887300 | 0.000000 |  |  |  | 3 B | 1.850623 | 1.758452 | 0.000000 |  |  | 4 B | 1.782467 | 1.705919 | 1.823705 | 0.000000 |  | 5 B | 3.896753 | 1.743819 | 3.050327 | 3.084181 | 0.000000 | 6 Os | 3.497478 | 2.275134 | 2.245568 | 3.448836 | 2.072886 | 7 B | 2.808535 | 1.926235 | 2.891557 | 1.980928 | 1.888812 | 8 B | 1.752069 | 3.001806 | 1.790970 | 2.888214 | 3.501432 | 9 B | 1.770649 | 2.996240 | 2.996165 | 1.739070 | 3.648858 | 10 B | 3.427484 | 2.789832 | 3.319347 | 3.380859 | 1.775610 | 11 B | 3.157186 | 3.488375 | 3.073001 | 3.890039 | 3.041781 | 12 Os | 2.302931 | 3.626409 | 3.354854 | 3.144561 | 3.549847 |  | 6 | 7 | 8 | 9 | 10 | 6 Os | 0.000000 |  |  |  |  | 7 B | 3.136681 | 0.000000 |  |  |  | 8 B | 2.320405 | 3.204330 | 0.000000 |  |  | 9 B | 4.177124 | 1.898062 | 3.043597 | 0.000000 |  | 10 B | 2.372539 | 1.876151 | 2.825429 | 3.130857 | 0.000000 | 11 B | 2.091822 | 3.202361 | 1.768497 | 3.709874 | 1.813190 | 12 Os | 3.587241 | 2.433189 | 2.305713 | 2.048787 | 2.137503 |  | 11 | 12 | 11 B | 0.000000 |  | 12 Os | 2.172471 | 0.000000 |
|------------------------------------------------------------------------------------------------------------------|-------------------------------------------------------------------------------------------------------------------------------------------------------------------------------------------------------------------------------------------------------------------------------------------------------------------------------------------------------------------------------------------------------------------------------------------------------------------------------------------------------------------------------------------------------------------------------------------------------------------------------------------------------------------------------------------------------------------------------------------------------------------------------------------------------------------------------------------------------------------------------------------------------------------------------------------------------------------------------------------------------------------------------------------------------------------------------------------------------------------------------------------------------------------------------------------------------------------------------------------------------------------------------------------------------------------------------------------------------------------------------------------------------------------------------------------------------------------------------------------------------------------------------------------------------------------------------------------------------------------------------------------------------------------------------------------------------------------------------------------------------------------------------------------------------------------------------------------------------------------------------------------------------------------------------------------------------------------------------------------------------------------------------------------------------------------------------------------------------------------------------------------------------------------------------------------------------------------------------------------------------------------------------------------------------------------------------------------|----------|----------|----------|----------|---|---|-----|----------|--|--|--|--|-----|----------|----------|--|--|--|-----|----------|----------|----------|--|--|-----|----------|----------|----------|----------|--|-----|----------|----------|----------|----------|----------|------|----------|----------|----------|----------|----------|-----|----------|----------|----------|----------|----------|-----|----------|----------|----------|----------|----------|-----|----------|----------|----------|----------|----------|------|----------|----------|----------|----------|----------|------|----------|----------|----------|----------|----------|-------|----------|----------|----------|----------|----------|--|---|---|---|---|----|------|----------|--|--|--|--|-----|----------|----------|--|--|--|-----|----------|----------|----------|--|--|-----|----------|----------|----------|----------|--|------|----------|----------|----------|----------|----------|------|----------|----------|----------|----------|----------|-------|----------|----------|----------|----------|----------|--|----|----|------|----------|--|-------|----------|----------|
|                                                                                                                  | 1                                                                                                                                                                                                                                                                                                                                                                                                                                                                                                                                                                                                                                                                                                                                                                                                                                                                                                                                                                                                                                                                                                                                                                                                                                                                                                                                                                                                                                                                                                                                                                                                                                                                                                                                                                                                                                                                                                                                                                                                                                                                                                                                                                                                                                                                                                                                         | 2        | 3        | 4        | 5        |   |   |     |          |  |  |  |  |     |          |          |  |  |  |     |          |          |          |  |  |     |          |          |          |          |  |     |          |          |          |          |          |      |          |          |          |          |          |     |          |          |          |          |          |     |          |          |          |          |          |     |          |          |          |          |          |      |          |          |          |          |          |      |          |          |          |          |          |       |          |          |          |          |          |  |   |   |   |   |    |      |          |  |  |  |  |     |          |          |  |  |  |     |          |          |          |  |  |     |          |          |          |          |  |      |          |          |          |          |          |      |          |          |          |          |          |       |          |          |          |          |          |  |    |    |      |          |  |       |          |          |
| 1 B                                                                                                              | 0.000000                                                                                                                                                                                                                                                                                                                                                                                                                                                                                                                                                                                                                                                                                                                                                                                                                                                                                                                                                                                                                                                                                                                                                                                                                                                                                                                                                                                                                                                                                                                                                                                                                                                                                                                                                                                                                                                                                                                                                                                                                                                                                                                                                                                                                                                                                                                                  |          |          |          |          |   |   |     |          |  |  |  |  |     |          |          |  |  |  |     |          |          |          |  |  |     |          |          |          |          |  |     |          |          |          |          |          |      |          |          |          |          |          |     |          |          |          |          |          |     |          |          |          |          |          |     |          |          |          |          |          |      |          |          |          |          |          |      |          |          |          |          |          |       |          |          |          |          |          |  |   |   |   |   |    |      |          |  |  |  |  |     |          |          |  |  |  |     |          |          |          |  |  |     |          |          |          |          |  |      |          |          |          |          |          |      |          |          |          |          |          |       |          |          |          |          |          |  |    |    |      |          |  |       |          |          |
| 2 B                                                                                                              | 2.887300                                                                                                                                                                                                                                                                                                                                                                                                                                                                                                                                                                                                                                                                                                                                                                                                                                                                                                                                                                                                                                                                                                                                                                                                                                                                                                                                                                                                                                                                                                                                                                                                                                                                                                                                                                                                                                                                                                                                                                                                                                                                                                                                                                                                                                                                                                                                  | 0.000000 |          |          |          |   |   |     |          |  |  |  |  |     |          |          |  |  |  |     |          |          |          |  |  |     |          |          |          |          |  |     |          |          |          |          |          |      |          |          |          |          |          |     |          |          |          |          |          |     |          |          |          |          |          |     |          |          |          |          |          |      |          |          |          |          |          |      |          |          |          |          |          |       |          |          |          |          |          |  |   |   |   |   |    |      |          |  |  |  |  |     |          |          |  |  |  |     |          |          |          |  |  |     |          |          |          |          |  |      |          |          |          |          |          |      |          |          |          |          |          |       |          |          |          |          |          |  |    |    |      |          |  |       |          |          |
| 3 B                                                                                                              | 1.850623                                                                                                                                                                                                                                                                                                                                                                                                                                                                                                                                                                                                                                                                                                                                                                                                                                                                                                                                                                                                                                                                                                                                                                                                                                                                                                                                                                                                                                                                                                                                                                                                                                                                                                                                                                                                                                                                                                                                                                                                                                                                                                                                                                                                                                                                                                                                  | 1.758452 | 0.000000 |          |          |   |   |     |          |  |  |  |  |     |          |          |  |  |  |     |          |          |          |  |  |     |          |          |          |          |  |     |          |          |          |          |          |      |          |          |          |          |          |     |          |          |          |          |          |     |          |          |          |          |          |     |          |          |          |          |          |      |          |          |          |          |          |      |          |          |          |          |          |       |          |          |          |          |          |  |   |   |   |   |    |      |          |  |  |  |  |     |          |          |  |  |  |     |          |          |          |  |  |     |          |          |          |          |  |      |          |          |          |          |          |      |          |          |          |          |          |       |          |          |          |          |          |  |    |    |      |          |  |       |          |          |
| 4 B                                                                                                              | 1.782467                                                                                                                                                                                                                                                                                                                                                                                                                                                                                                                                                                                                                                                                                                                                                                                                                                                                                                                                                                                                                                                                                                                                                                                                                                                                                                                                                                                                                                                                                                                                                                                                                                                                                                                                                                                                                                                                                                                                                                                                                                                                                                                                                                                                                                                                                                                                  | 1.705919 | 1.823705 | 0.000000 |          |   |   |     |          |  |  |  |  |     |          |          |  |  |  |     |          |          |          |  |  |     |          |          |          |          |  |     |          |          |          |          |          |      |          |          |          |          |          |     |          |          |          |          |          |     |          |          |          |          |          |     |          |          |          |          |          |      |          |          |          |          |          |      |          |          |          |          |          |       |          |          |          |          |          |  |   |   |   |   |    |      |          |  |  |  |  |     |          |          |  |  |  |     |          |          |          |  |  |     |          |          |          |          |  |      |          |          |          |          |          |      |          |          |          |          |          |       |          |          |          |          |          |  |    |    |      |          |  |       |          |          |
| 5 B                                                                                                              | 3.896753                                                                                                                                                                                                                                                                                                                                                                                                                                                                                                                                                                                                                                                                                                                                                                                                                                                                                                                                                                                                                                                                                                                                                                                                                                                                                                                                                                                                                                                                                                                                                                                                                                                                                                                                                                                                                                                                                                                                                                                                                                                                                                                                                                                                                                                                                                                                  | 1.743819 | 3.050327 | 3.084181 | 0.000000 |   |   |     |          |  |  |  |  |     |          |          |  |  |  |     |          |          |          |  |  |     |          |          |          |          |  |     |          |          |          |          |          |      |          |          |          |          |          |     |          |          |          |          |          |     |          |          |          |          |          |     |          |          |          |          |          |      |          |          |          |          |          |      |          |          |          |          |          |       |          |          |          |          |          |  |   |   |   |   |    |      |          |  |  |  |  |     |          |          |  |  |  |     |          |          |          |  |  |     |          |          |          |          |  |      |          |          |          |          |          |      |          |          |          |          |          |       |          |          |          |          |          |  |    |    |      |          |  |       |          |          |
| 6 Os                                                                                                             | 3.497478                                                                                                                                                                                                                                                                                                                                                                                                                                                                                                                                                                                                                                                                                                                                                                                                                                                                                                                                                                                                                                                                                                                                                                                                                                                                                                                                                                                                                                                                                                                                                                                                                                                                                                                                                                                                                                                                                                                                                                                                                                                                                                                                                                                                                                                                                                                                  | 2.275134 | 2.245568 | 3.448836 | 2.072886 |   |   |     |          |  |  |  |  |     |          |          |  |  |  |     |          |          |          |  |  |     |          |          |          |          |  |     |          |          |          |          |          |      |          |          |          |          |          |     |          |          |          |          |          |     |          |          |          |          |          |     |          |          |          |          |          |      |          |          |          |          |          |      |          |          |          |          |          |       |          |          |          |          |          |  |   |   |   |   |    |      |          |  |  |  |  |     |          |          |  |  |  |     |          |          |          |  |  |     |          |          |          |          |  |      |          |          |          |          |          |      |          |          |          |          |          |       |          |          |          |          |          |  |    |    |      |          |  |       |          |          |
| 7 B                                                                                                              | 2.808535                                                                                                                                                                                                                                                                                                                                                                                                                                                                                                                                                                                                                                                                                                                                                                                                                                                                                                                                                                                                                                                                                                                                                                                                                                                                                                                                                                                                                                                                                                                                                                                                                                                                                                                                                                                                                                                                                                                                                                                                                                                                                                                                                                                                                                                                                                                                  | 1.926235 | 2.891557 | 1.980928 | 1.888812 |   |   |     |          |  |  |  |  |     |          |          |  |  |  |     |          |          |          |  |  |     |          |          |          |          |  |     |          |          |          |          |          |      |          |          |          |          |          |     |          |          |          |          |          |     |          |          |          |          |          |     |          |          |          |          |          |      |          |          |          |          |          |      |          |          |          |          |          |       |          |          |          |          |          |  |   |   |   |   |    |      |          |  |  |  |  |     |          |          |  |  |  |     |          |          |          |  |  |     |          |          |          |          |  |      |          |          |          |          |          |      |          |          |          |          |          |       |          |          |          |          |          |  |    |    |      |          |  |       |          |          |
| 8 B                                                                                                              | 1.752069                                                                                                                                                                                                                                                                                                                                                                                                                                                                                                                                                                                                                                                                                                                                                                                                                                                                                                                                                                                                                                                                                                                                                                                                                                                                                                                                                                                                                                                                                                                                                                                                                                                                                                                                                                                                                                                                                                                                                                                                                                                                                                                                                                                                                                                                                                                                  | 3.001806 | 1.790970 | 2.888214 | 3.501432 |   |   |     |          |  |  |  |  |     |          |          |  |  |  |     |          |          |          |  |  |     |          |          |          |          |  |     |          |          |          |          |          |      |          |          |          |          |          |     |          |          |          |          |          |     |          |          |          |          |          |     |          |          |          |          |          |      |          |          |          |          |          |      |          |          |          |          |          |       |          |          |          |          |          |  |   |   |   |   |    |      |          |  |  |  |  |     |          |          |  |  |  |     |          |          |          |  |  |     |          |          |          |          |  |      |          |          |          |          |          |      |          |          |          |          |          |       |          |          |          |          |          |  |    |    |      |          |  |       |          |          |
| 9 B                                                                                                              | 1.770649                                                                                                                                                                                                                                                                                                                                                                                                                                                                                                                                                                                                                                                                                                                                                                                                                                                                                                                                                                                                                                                                                                                                                                                                                                                                                                                                                                                                                                                                                                                                                                                                                                                                                                                                                                                                                                                                                                                                                                                                                                                                                                                                                                                                                                                                                                                                  | 2.996240 | 2.996165 | 1.739070 | 3.648858 |   |   |     |          |  |  |  |  |     |          |          |  |  |  |     |          |          |          |  |  |     |          |          |          |          |  |     |          |          |          |          |          |      |          |          |          |          |          |     |          |          |          |          |          |     |          |          |          |          |          |     |          |          |          |          |          |      |          |          |          |          |          |      |          |          |          |          |          |       |          |          |          |          |          |  |   |   |   |   |    |      |          |  |  |  |  |     |          |          |  |  |  |     |          |          |          |  |  |     |          |          |          |          |  |      |          |          |          |          |          |      |          |          |          |          |          |       |          |          |          |          |          |  |    |    |      |          |  |       |          |          |
| 10 B                                                                                                             | 3.427484                                                                                                                                                                                                                                                                                                                                                                                                                                                                                                                                                                                                                                                                                                                                                                                                                                                                                                                                                                                                                                                                                                                                                                                                                                                                                                                                                                                                                                                                                                                                                                                                                                                                                                                                                                                                                                                                                                                                                                                                                                                                                                                                                                                                                                                                                                                                  | 2.789832 | 3.319347 | 3.380859 | 1.775610 |   |   |     |          |  |  |  |  |     |          |          |  |  |  |     |          |          |          |  |  |     |          |          |          |          |  |     |          |          |          |          |          |      |          |          |          |          |          |     |          |          |          |          |          |     |          |          |          |          |          |     |          |          |          |          |          |      |          |          |          |          |          |      |          |          |          |          |          |       |          |          |          |          |          |  |   |   |   |   |    |      |          |  |  |  |  |     |          |          |  |  |  |     |          |          |          |  |  |     |          |          |          |          |  |      |          |          |          |          |          |      |          |          |          |          |          |       |          |          |          |          |          |  |    |    |      |          |  |       |          |          |
| 11 B                                                                                                             | 3.157186                                                                                                                                                                                                                                                                                                                                                                                                                                                                                                                                                                                                                                                                                                                                                                                                                                                                                                                                                                                                                                                                                                                                                                                                                                                                                                                                                                                                                                                                                                                                                                                                                                                                                                                                                                                                                                                                                                                                                                                                                                                                                                                                                                                                                                                                                                                                  | 3.488375 | 3.073001 | 3.890039 | 3.041781 |   |   |     |          |  |  |  |  |     |          |          |  |  |  |     |          |          |          |  |  |     |          |          |          |          |  |     |          |          |          |          |          |      |          |          |          |          |          |     |          |          |          |          |          |     |          |          |          |          |          |     |          |          |          |          |          |      |          |          |          |          |          |      |          |          |          |          |          |       |          |          |          |          |          |  |   |   |   |   |    |      |          |  |  |  |  |     |          |          |  |  |  |     |          |          |          |  |  |     |          |          |          |          |  |      |          |          |          |          |          |      |          |          |          |          |          |       |          |          |          |          |          |  |    |    |      |          |  |       |          |          |
| 12 Os                                                                                                            | 2.302931                                                                                                                                                                                                                                                                                                                                                                                                                                                                                                                                                                                                                                                                                                                                                                                                                                                                                                                                                                                                                                                                                                                                                                                                                                                                                                                                                                                                                                                                                                                                                                                                                                                                                                                                                                                                                                                                                                                                                                                                                                                                                                                                                                                                                                                                                                                                  | 3.626409 | 3.354854 | 3.144561 | 3.549847 |   |   |     |          |  |  |  |  |     |          |          |  |  |  |     |          |          |          |  |  |     |          |          |          |          |  |     |          |          |          |          |          |      |          |          |          |          |          |     |          |          |          |          |          |     |          |          |          |          |          |     |          |          |          |          |          |      |          |          |          |          |          |      |          |          |          |          |          |       |          |          |          |          |          |  |   |   |   |   |    |      |          |  |  |  |  |     |          |          |  |  |  |     |          |          |          |  |  |     |          |          |          |          |  |      |          |          |          |          |          |      |          |          |          |          |          |       |          |          |          |          |          |  |    |    |      |          |  |       |          |          |
|                                                                                                                  | 6                                                                                                                                                                                                                                                                                                                                                                                                                                                                                                                                                                                                                                                                                                                                                                                                                                                                                                                                                                                                                                                                                                                                                                                                                                                                                                                                                                                                                                                                                                                                                                                                                                                                                                                                                                                                                                                                                                                                                                                                                                                                                                                                                                                                                                                                                                                                         | 7        | 8        | 9        | 10       |   |   |     |          |  |  |  |  |     |          |          |  |  |  |     |          |          |          |  |  |     |          |          |          |          |  |     |          |          |          |          |          |      |          |          |          |          |          |     |          |          |          |          |          |     |          |          |          |          |          |     |          |          |          |          |          |      |          |          |          |          |          |      |          |          |          |          |          |       |          |          |          |          |          |  |   |   |   |   |    |      |          |  |  |  |  |     |          |          |  |  |  |     |          |          |          |  |  |     |          |          |          |          |  |      |          |          |          |          |          |      |          |          |          |          |          |       |          |          |          |          |          |  |    |    |      |          |  |       |          |          |
| 6 Os                                                                                                             | 0.000000                                                                                                                                                                                                                                                                                                                                                                                                                                                                                                                                                                                                                                                                                                                                                                                                                                                                                                                                                                                                                                                                                                                                                                                                                                                                                                                                                                                                                                                                                                                                                                                                                                                                                                                                                                                                                                                                                                                                                                                                                                                                                                                                                                                                                                                                                                                                  |          |          |          |          |   |   |     |          |  |  |  |  |     |          |          |  |  |  |     |          |          |          |  |  |     |          |          |          |          |  |     |          |          |          |          |          |      |          |          |          |          |          |     |          |          |          |          |          |     |          |          |          |          |          |     |          |          |          |          |          |      |          |          |          |          |          |      |          |          |          |          |          |       |          |          |          |          |          |  |   |   |   |   |    |      |          |  |  |  |  |     |          |          |  |  |  |     |          |          |          |  |  |     |          |          |          |          |  |      |          |          |          |          |          |      |          |          |          |          |          |       |          |          |          |          |          |  |    |    |      |          |  |       |          |          |
| 7 B                                                                                                              | 3.136681                                                                                                                                                                                                                                                                                                                                                                                                                                                                                                                                                                                                                                                                                                                                                                                                                                                                                                                                                                                                                                                                                                                                                                                                                                                                                                                                                                                                                                                                                                                                                                                                                                                                                                                                                                                                                                                                                                                                                                                                                                                                                                                                                                                                                                                                                                                                  | 0.000000 |          |          |          |   |   |     |          |  |  |  |  |     |          |          |  |  |  |     |          |          |          |  |  |     |          |          |          |          |  |     |          |          |          |          |          |      |          |          |          |          |          |     |          |          |          |          |          |     |          |          |          |          |          |     |          |          |          |          |          |      |          |          |          |          |          |      |          |          |          |          |          |       |          |          |          |          |          |  |   |   |   |   |    |      |          |  |  |  |  |     |          |          |  |  |  |     |          |          |          |  |  |     |          |          |          |          |  |      |          |          |          |          |          |      |          |          |          |          |          |       |          |          |          |          |          |  |    |    |      |          |  |       |          |          |
| 8 B                                                                                                              | 2.320405                                                                                                                                                                                                                                                                                                                                                                                                                                                                                                                                                                                                                                                                                                                                                                                                                                                                                                                                                                                                                                                                                                                                                                                                                                                                                                                                                                                                                                                                                                                                                                                                                                                                                                                                                                                                                                                                                                                                                                                                                                                                                                                                                                                                                                                                                                                                  | 3.204330 | 0.000000 |          |          |   |   |     |          |  |  |  |  |     |          |          |  |  |  |     |          |          |          |  |  |     |          |          |          |          |  |     |          |          |          |          |          |      |          |          |          |          |          |     |          |          |          |          |          |     |          |          |          |          |          |     |          |          |          |          |          |      |          |          |          |          |          |      |          |          |          |          |          |       |          |          |          |          |          |  |   |   |   |   |    |      |          |  |  |  |  |     |          |          |  |  |  |     |          |          |          |  |  |     |          |          |          |          |  |      |          |          |          |          |          |      |          |          |          |          |          |       |          |          |          |          |          |  |    |    |      |          |  |       |          |          |
| 9 B                                                                                                              | 4.177124                                                                                                                                                                                                                                                                                                                                                                                                                                                                                                                                                                                                                                                                                                                                                                                                                                                                                                                                                                                                                                                                                                                                                                                                                                                                                                                                                                                                                                                                                                                                                                                                                                                                                                                                                                                                                                                                                                                                                                                                                                                                                                                                                                                                                                                                                                                                  | 1.898062 | 3.043597 | 0.000000 |          |   |   |     |          |  |  |  |  |     |          |          |  |  |  |     |          |          |          |  |  |     |          |          |          |          |  |     |          |          |          |          |          |      |          |          |          |          |          |     |          |          |          |          |          |     |          |          |          |          |          |     |          |          |          |          |          |      |          |          |          |          |          |      |          |          |          |          |          |       |          |          |          |          |          |  |   |   |   |   |    |      |          |  |  |  |  |     |          |          |  |  |  |     |          |          |          |  |  |     |          |          |          |          |  |      |          |          |          |          |          |      |          |          |          |          |          |       |          |          |          |          |          |  |    |    |      |          |  |       |          |          |
| 10 B                                                                                                             | 2.372539                                                                                                                                                                                                                                                                                                                                                                                                                                                                                                                                                                                                                                                                                                                                                                                                                                                                                                                                                                                                                                                                                                                                                                                                                                                                                                                                                                                                                                                                                                                                                                                                                                                                                                                                                                                                                                                                                                                                                                                                                                                                                                                                                                                                                                                                                                                                  | 1.876151 | 2.825429 | 3.130857 | 0.000000 |   |   |     |          |  |  |  |  |     |          |          |  |  |  |     |          |          |          |  |  |     |          |          |          |          |  |     |          |          |          |          |          |      |          |          |          |          |          |     |          |          |          |          |          |     |          |          |          |          |          |     |          |          |          |          |          |      |          |          |          |          |          |      |          |          |          |          |          |       |          |          |          |          |          |  |   |   |   |   |    |      |          |  |  |  |  |     |          |          |  |  |  |     |          |          |          |  |  |     |          |          |          |          |  |      |          |          |          |          |          |      |          |          |          |          |          |       |          |          |          |          |          |  |    |    |      |          |  |       |          |          |
| 11 B                                                                                                             | 2.091822                                                                                                                                                                                                                                                                                                                                                                                                                                                                                                                                                                                                                                                                                                                                                                                                                                                                                                                                                                                                                                                                                                                                                                                                                                                                                                                                                                                                                                                                                                                                                                                                                                                                                                                                                                                                                                                                                                                                                                                                                                                                                                                                                                                                                                                                                                                                  | 3.202361 | 1.768497 | 3.709874 | 1.813190 |   |   |     |          |  |  |  |  |     |          |          |  |  |  |     |          |          |          |  |  |     |          |          |          |          |  |     |          |          |          |          |          |      |          |          |          |          |          |     |          |          |          |          |          |     |          |          |          |          |          |     |          |          |          |          |          |      |          |          |          |          |          |      |          |          |          |          |          |       |          |          |          |          |          |  |   |   |   |   |    |      |          |  |  |  |  |     |          |          |  |  |  |     |          |          |          |  |  |     |          |          |          |          |  |      |          |          |          |          |          |      |          |          |          |          |          |       |          |          |          |          |          |  |    |    |      |          |  |       |          |          |
| 12 Os                                                                                                            | 3.587241                                                                                                                                                                                                                                                                                                                                                                                                                                                                                                                                                                                                                                                                                                                                                                                                                                                                                                                                                                                                                                                                                                                                                                                                                                                                                                                                                                                                                                                                                                                                                                                                                                                                                                                                                                                                                                                                                                                                                                                                                                                                                                                                                                                                                                                                                                                                  | 2.433189 | 2.305713 | 2.048787 | 2.137503 |   |   |     |          |  |  |  |  |     |          |          |  |  |  |     |          |          |          |  |  |     |          |          |          |          |  |     |          |          |          |          |          |      |          |          |          |          |          |     |          |          |          |          |          |     |          |          |          |          |          |     |          |          |          |          |          |      |          |          |          |          |          |      |          |          |          |          |          |       |          |          |          |          |          |  |   |   |   |   |    |      |          |  |  |  |  |     |          |          |  |  |  |     |          |          |          |  |  |     |          |          |          |          |  |      |          |          |          |          |          |      |          |          |          |          |          |       |          |          |          |          |          |  |    |    |      |          |  |       |          |          |
|                                                                                                                  | 11                                                                                                                                                                                                                                                                                                                                                                                                                                                                                                                                                                                                                                                                                                                                                                                                                                                                                                                                                                                                                                                                                                                                                                                                                                                                                                                                                                                                                                                                                                                                                                                                                                                                                                                                                                                                                                                                                                                                                                                                                                                                                                                                                                                                                                                                                                                                        | 12       |          |          |          |   |   |     |          |  |  |  |  |     |          |          |  |  |  |     |          |          |          |  |  |     |          |          |          |          |  |     |          |          |          |          |          |      |          |          |          |          |          |     |          |          |          |          |          |     |          |          |          |          |          |     |          |          |          |          |          |      |          |          |          |          |          |      |          |          |          |          |          |       |          |          |          |          |          |  |   |   |   |   |    |      |          |  |  |  |  |     |          |          |  |  |  |     |          |          |          |  |  |     |          |          |          |          |  |      |          |          |          |          |          |      |          |          |          |          |          |       |          |          |          |          |          |  |    |    |      |          |  |       |          |          |
| 11 B                                                                                                             | 0.000000                                                                                                                                                                                                                                                                                                                                                                                                                                                                                                                                                                                                                                                                                                                                                                                                                                                                                                                                                                                                                                                                                                                                                                                                                                                                                                                                                                                                                                                                                                                                                                                                                                                                                                                                                                                                                                                                                                                                                                                                                                                                                                                                                                                                                                                                                                                                  |          |          |          |          |   |   |     |          |  |  |  |  |     |          |          |  |  |  |     |          |          |          |  |  |     |          |          |          |          |  |     |          |          |          |          |          |      |          |          |          |          |          |     |          |          |          |          |          |     |          |          |          |          |          |     |          |          |          |          |          |      |          |          |          |          |          |      |          |          |          |          |          |       |          |          |          |          |          |  |   |   |   |   |    |      |          |  |  |  |  |     |          |          |  |  |  |     |          |          |          |  |  |     |          |          |          |          |  |      |          |          |          |          |          |      |          |          |          |          |          |       |          |          |          |          |          |  |    |    |      |          |  |       |          |          |
| 12 Os                                                                                                            | 2.172471                                                                                                                                                                                                                                                                                                                                                                                                                                                                                                                                                                                                                                                                                                                                                                                                                                                                                                                                                                                                                                                                                                                                                                                                                                                                                                                                                                                                                                                                                                                                                                                                                                                                                                                                                                                                                                                                                                                                                                                                                                                                                                                                                                                                                                                                                                                                  | 0.000000 |          |          |          |   |   |     |          |  |  |  |  |     |          |          |  |  |  |     |          |          |          |  |  |     |          |          |          |          |  |     |          |          |          |          |          |      |          |          |          |          |          |     |          |          |          |          |          |     |          |          |          |          |          |     |          |          |          |          |          |      |          |          |          |          |          |      |          |          |          |          |          |       |          |          |          |          |          |  |   |   |   |   |    |      |          |  |  |  |  |     |          |          |  |  |  |     |          |          |          |  |  |     |          |          |          |          |  |      |          |          |          |          |          |      |          |          |          |          |          |       |          |          |          |          |          |  |    |    |      |          |  |       |          |          |
|  <p>4. -823.22347701 +19.5</p> | <table border="1"> <thead> <tr> <th></th> <th>1</th> <th>2</th> <th>3</th> <th>4</th> <th>5</th> </tr> </thead> <tbody> <tr><td>1 B</td><td>0.000000</td><td></td><td></td><td></td><td></td></tr> <tr><td>2 B</td><td>3.037326</td><td>0.000000</td><td></td><td></td><td></td></tr> <tr><td>3 B</td><td>1.913552</td><td>1.748434</td><td>0.000000</td><td></td><td></td></tr> <tr><td>4 B</td><td>1.832146</td><td>1.797504</td><td>1.764326</td><td>0.000000</td><td></td></tr> <tr><td>5 B</td><td>3.826752</td><td>1.766024</td><td>3.094066</td><td>2.910430</td><td>0.000000</td></tr> <tr><td>6 Os</td><td>3.163251</td><td>2.259380</td><td>2.296221</td><td>3.192501</td><td>2.068329</td></tr> <tr><td>7 B</td><td>3.200288</td><td>1.879786</td><td>3.025933</td><td>1.859439</td><td>1.734415</td></tr> <tr><td>8 B</td><td>1.720841</td><td>3.062365</td><td>1.759940</td><td>2.859519</td><td>3.641982</td></tr> <tr><td>9 B</td><td>3.024418</td><td>3.020337</td><td>3.455067</td><td>1.691716</td><td>3.643697</td></tr> <tr><td>10 B</td><td>3.027110</td><td>2.742090</td><td>3.281443</td><td>2.794915</td><td>1.796211</td></tr> <tr><td>11 B</td><td>1.858345</td><td>3.239222</td><td>2.722572</td><td>2.787919</td><td>3.108228</td></tr> <tr><td>12 Os</td><td>2.248859</td><td>3.473513</td><td>3.474162</td><td>2.211786</td><td>3.500524</td></tr> <tr> <th></th> <th>6</th> <th>7</th> <th>8</th> <th>9</th> <th>10</th> </tr> <tr><td>6 Os</td><td>0.000000</td><td></td><td></td><td></td><td></td></tr> <tr><td>7 B</td><td>3.153430</td><td>0.000000</td><td></td><td></td><td></td></tr> <tr><td>8 B</td><td>2.096304</td><td>3.824943</td><td>0.000000</td><td></td><td></td></tr> <tr><td>9 B</td><td>4.571542</td><td>1.962713</td><td>4.376427</td><td>0.000000</td><td></td></tr> <tr><td>10 B</td><td>2.366054</td><td>1.892436</td><td>3.131511</td><td>3.331387</td><td>0.000000</td></tr> <tr><td>11 B</td><td>2.312230</td><td>3.074754</td><td>1.747655</td><td>3.789002</td><td>1.812094</td></tr> <tr><td>12 Os</td><td>3.924649</td><td>2.291289</td><td>3.490548</td><td>2.039316</td><td>2.217671</td></tr> <tr> <th></th> <th>11</th> <th>12</th> </tr> <tr><td>11 B</td><td>0.000000</td><td></td></tr> <tr><td>12 Os</td><td>2.278416</td><td>0.000000</td></tr> </tbody> </table> |          | 1        | 2        | 3        | 4 | 5 | 1 B | 0.000000 |  |  |  |  | 2 B | 3.037326 | 0.000000 |  |  |  | 3 B | 1.913552 | 1.748434 | 0.000000 |  |  | 4 B | 1.832146 | 1.797504 | 1.764326 | 0.000000 |  | 5 B | 3.826752 | 1.766024 | 3.094066 | 2.910430 | 0.000000 | 6 Os | 3.163251 | 2.259380 | 2.296221 | 3.192501 | 2.068329 | 7 B | 3.200288 | 1.879786 | 3.025933 | 1.859439 | 1.734415 | 8 B | 1.720841 | 3.062365 | 1.759940 | 2.859519 | 3.641982 | 9 B | 3.024418 | 3.020337 | 3.455067 | 1.691716 | 3.643697 | 10 B | 3.027110 | 2.742090 | 3.281443 | 2.794915 | 1.796211 | 11 B | 1.858345 | 3.239222 | 2.722572 | 2.787919 | 3.108228 | 12 Os | 2.248859 | 3.473513 | 3.474162 | 2.211786 | 3.500524 |  | 6 | 7 | 8 | 9 | 10 | 6 Os | 0.000000 |  |  |  |  | 7 B | 3.153430 | 0.000000 |  |  |  | 8 B | 2.096304 | 3.824943 | 0.000000 |  |  | 9 B | 4.571542 | 1.962713 | 4.376427 | 0.000000 |  | 10 B | 2.366054 | 1.892436 | 3.131511 | 3.331387 | 0.000000 | 11 B | 2.312230 | 3.074754 | 1.747655 | 3.789002 | 1.812094 | 12 Os | 3.924649 | 2.291289 | 3.490548 | 2.039316 | 2.217671 |  | 11 | 12 | 11 B | 0.000000 |  | 12 Os | 2.278416 | 0.000000 |
|                                                                                                                  | 1                                                                                                                                                                                                                                                                                                                                                                                                                                                                                                                                                                                                                                                                                                                                                                                                                                                                                                                                                                                                                                                                                                                                                                                                                                                                                                                                                                                                                                                                                                                                                                                                                                                                                                                                                                                                                                                                                                                                                                                                                                                                                                                                                                                                                                                                                                                                         | 2        | 3        | 4        | 5        |   |   |     |          |  |  |  |  |     |          |          |  |  |  |     |          |          |          |  |  |     |          |          |          |          |  |     |          |          |          |          |          |      |          |          |          |          |          |     |          |          |          |          |          |     |          |          |          |          |          |     |          |          |          |          |          |      |          |          |          |          |          |      |          |          |          |          |          |       |          |          |          |          |          |  |   |   |   |   |    |      |          |  |  |  |  |     |          |          |  |  |  |     |          |          |          |  |  |     |          |          |          |          |  |      |          |          |          |          |          |      |          |          |          |          |          |       |          |          |          |          |          |  |    |    |      |          |  |       |          |          |
| 1 B                                                                                                              | 0.000000                                                                                                                                                                                                                                                                                                                                                                                                                                                                                                                                                                                                                                                                                                                                                                                                                                                                                                                                                                                                                                                                                                                                                                                                                                                                                                                                                                                                                                                                                                                                                                                                                                                                                                                                                                                                                                                                                                                                                                                                                                                                                                                                                                                                                                                                                                                                  |          |          |          |          |   |   |     |          |  |  |  |  |     |          |          |  |  |  |     |          |          |          |  |  |     |          |          |          |          |  |     |          |          |          |          |          |      |          |          |          |          |          |     |          |          |          |          |          |     |          |          |          |          |          |     |          |          |          |          |          |      |          |          |          |          |          |      |          |          |          |          |          |       |          |          |          |          |          |  |   |   |   |   |    |      |          |  |  |  |  |     |          |          |  |  |  |     |          |          |          |  |  |     |          |          |          |          |  |      |          |          |          |          |          |      |          |          |          |          |          |       |          |          |          |          |          |  |    |    |      |          |  |       |          |          |
| 2 B                                                                                                              | 3.037326                                                                                                                                                                                                                                                                                                                                                                                                                                                                                                                                                                                                                                                                                                                                                                                                                                                                                                                                                                                                                                                                                                                                                                                                                                                                                                                                                                                                                                                                                                                                                                                                                                                                                                                                                                                                                                                                                                                                                                                                                                                                                                                                                                                                                                                                                                                                  | 0.000000 |          |          |          |   |   |     |          |  |  |  |  |     |          |          |  |  |  |     |          |          |          |  |  |     |          |          |          |          |  |     |          |          |          |          |          |      |          |          |          |          |          |     |          |          |          |          |          |     |          |          |          |          |          |     |          |          |          |          |          |      |          |          |          |          |          |      |          |          |          |          |          |       |          |          |          |          |          |  |   |   |   |   |    |      |          |  |  |  |  |     |          |          |  |  |  |     |          |          |          |  |  |     |          |          |          |          |  |      |          |          |          |          |          |      |          |          |          |          |          |       |          |          |          |          |          |  |    |    |      |          |  |       |          |          |
| 3 B                                                                                                              | 1.913552                                                                                                                                                                                                                                                                                                                                                                                                                                                                                                                                                                                                                                                                                                                                                                                                                                                                                                                                                                                                                                                                                                                                                                                                                                                                                                                                                                                                                                                                                                                                                                                                                                                                                                                                                                                                                                                                                                                                                                                                                                                                                                                                                                                                                                                                                                                                  | 1.748434 | 0.000000 |          |          |   |   |     |          |  |  |  |  |     |          |          |  |  |  |     |          |          |          |  |  |     |          |          |          |          |  |     |          |          |          |          |          |      |          |          |          |          |          |     |          |          |          |          |          |     |          |          |          |          |          |     |          |          |          |          |          |      |          |          |          |          |          |      |          |          |          |          |          |       |          |          |          |          |          |  |   |   |   |   |    |      |          |  |  |  |  |     |          |          |  |  |  |     |          |          |          |  |  |     |          |          |          |          |  |      |          |          |          |          |          |      |          |          |          |          |          |       |          |          |          |          |          |  |    |    |      |          |  |       |          |          |
| 4 B                                                                                                              | 1.832146                                                                                                                                                                                                                                                                                                                                                                                                                                                                                                                                                                                                                                                                                                                                                                                                                                                                                                                                                                                                                                                                                                                                                                                                                                                                                                                                                                                                                                                                                                                                                                                                                                                                                                                                                                                                                                                                                                                                                                                                                                                                                                                                                                                                                                                                                                                                  | 1.797504 | 1.764326 | 0.000000 |          |   |   |     |          |  |  |  |  |     |          |          |  |  |  |     |          |          |          |  |  |     |          |          |          |          |  |     |          |          |          |          |          |      |          |          |          |          |          |     |          |          |          |          |          |     |          |          |          |          |          |     |          |          |          |          |          |      |          |          |          |          |          |      |          |          |          |          |          |       |          |          |          |          |          |  |   |   |   |   |    |      |          |  |  |  |  |     |          |          |  |  |  |     |          |          |          |  |  |     |          |          |          |          |  |      |          |          |          |          |          |      |          |          |          |          |          |       |          |          |          |          |          |  |    |    |      |          |  |       |          |          |
| 5 B                                                                                                              | 3.826752                                                                                                                                                                                                                                                                                                                                                                                                                                                                                                                                                                                                                                                                                                                                                                                                                                                                                                                                                                                                                                                                                                                                                                                                                                                                                                                                                                                                                                                                                                                                                                                                                                                                                                                                                                                                                                                                                                                                                                                                                                                                                                                                                                                                                                                                                                                                  | 1.766024 | 3.094066 | 2.910430 | 0.000000 |   |   |     |          |  |  |  |  |     |          |          |  |  |  |     |          |          |          |  |  |     |          |          |          |          |  |     |          |          |          |          |          |      |          |          |          |          |          |     |          |          |          |          |          |     |          |          |          |          |          |     |          |          |          |          |          |      |          |          |          |          |          |      |          |          |          |          |          |       |          |          |          |          |          |  |   |   |   |   |    |      |          |  |  |  |  |     |          |          |  |  |  |     |          |          |          |  |  |     |          |          |          |          |  |      |          |          |          |          |          |      |          |          |          |          |          |       |          |          |          |          |          |  |    |    |      |          |  |       |          |          |
| 6 Os                                                                                                             | 3.163251                                                                                                                                                                                                                                                                                                                                                                                                                                                                                                                                                                                                                                                                                                                                                                                                                                                                                                                                                                                                                                                                                                                                                                                                                                                                                                                                                                                                                                                                                                                                                                                                                                                                                                                                                                                                                                                                                                                                                                                                                                                                                                                                                                                                                                                                                                                                  | 2.259380 | 2.296221 | 3.192501 | 2.068329 |   |   |     |          |  |  |  |  |     |          |          |  |  |  |     |          |          |          |  |  |     |          |          |          |          |  |     |          |          |          |          |          |      |          |          |          |          |          |     |          |          |          |          |          |     |          |          |          |          |          |     |          |          |          |          |          |      |          |          |          |          |          |      |          |          |          |          |          |       |          |          |          |          |          |  |   |   |   |   |    |      |          |  |  |  |  |     |          |          |  |  |  |     |          |          |          |  |  |     |          |          |          |          |  |      |          |          |          |          |          |      |          |          |          |          |          |       |          |          |          |          |          |  |    |    |      |          |  |       |          |          |
| 7 B                                                                                                              | 3.200288                                                                                                                                                                                                                                                                                                                                                                                                                                                                                                                                                                                                                                                                                                                                                                                                                                                                                                                                                                                                                                                                                                                                                                                                                                                                                                                                                                                                                                                                                                                                                                                                                                                                                                                                                                                                                                                                                                                                                                                                                                                                                                                                                                                                                                                                                                                                  | 1.879786 | 3.025933 | 1.859439 | 1.734415 |   |   |     |          |  |  |  |  |     |          |          |  |  |  |     |          |          |          |  |  |     |          |          |          |          |  |     |          |          |          |          |          |      |          |          |          |          |          |     |          |          |          |          |          |     |          |          |          |          |          |     |          |          |          |          |          |      |          |          |          |          |          |      |          |          |          |          |          |       |          |          |          |          |          |  |   |   |   |   |    |      |          |  |  |  |  |     |          |          |  |  |  |     |          |          |          |  |  |     |          |          |          |          |  |      |          |          |          |          |          |      |          |          |          |          |          |       |          |          |          |          |          |  |    |    |      |          |  |       |          |          |
| 8 B                                                                                                              | 1.720841                                                                                                                                                                                                                                                                                                                                                                                                                                                                                                                                                                                                                                                                                                                                                                                                                                                                                                                                                                                                                                                                                                                                                                                                                                                                                                                                                                                                                                                                                                                                                                                                                                                                                                                                                                                                                                                                                                                                                                                                                                                                                                                                                                                                                                                                                                                                  | 3.062365 | 1.759940 | 2.859519 | 3.641982 |   |   |     |          |  |  |  |  |     |          |          |  |  |  |     |          |          |          |  |  |     |          |          |          |          |  |     |          |          |          |          |          |      |          |          |          |          |          |     |          |          |          |          |          |     |          |          |          |          |          |     |          |          |          |          |          |      |          |          |          |          |          |      |          |          |          |          |          |       |          |          |          |          |          |  |   |   |   |   |    |      |          |  |  |  |  |     |          |          |  |  |  |     |          |          |          |  |  |     |          |          |          |          |  |      |          |          |          |          |          |      |          |          |          |          |          |       |          |          |          |          |          |  |    |    |      |          |  |       |          |          |
| 9 B                                                                                                              | 3.024418                                                                                                                                                                                                                                                                                                                                                                                                                                                                                                                                                                                                                                                                                                                                                                                                                                                                                                                                                                                                                                                                                                                                                                                                                                                                                                                                                                                                                                                                                                                                                                                                                                                                                                                                                                                                                                                                                                                                                                                                                                                                                                                                                                                                                                                                                                                                  | 3.020337 | 3.455067 | 1.691716 | 3.643697 |   |   |     |          |  |  |  |  |     |          |          |  |  |  |     |          |          |          |  |  |     |          |          |          |          |  |     |          |          |          |          |          |      |          |          |          |          |          |     |          |          |          |          |          |     |          |          |          |          |          |     |          |          |          |          |          |      |          |          |          |          |          |      |          |          |          |          |          |       |          |          |          |          |          |  |   |   |   |   |    |      |          |  |  |  |  |     |          |          |  |  |  |     |          |          |          |  |  |     |          |          |          |          |  |      |          |          |          |          |          |      |          |          |          |          |          |       |          |          |          |          |          |  |    |    |      |          |  |       |          |          |
| 10 B                                                                                                             | 3.027110                                                                                                                                                                                                                                                                                                                                                                                                                                                                                                                                                                                                                                                                                                                                                                                                                                                                                                                                                                                                                                                                                                                                                                                                                                                                                                                                                                                                                                                                                                                                                                                                                                                                                                                                                                                                                                                                                                                                                                                                                                                                                                                                                                                                                                                                                                                                  | 2.742090 | 3.281443 | 2.794915 | 1.796211 |   |   |     |          |  |  |  |  |     |          |          |  |  |  |     |          |          |          |  |  |     |          |          |          |          |  |     |          |          |          |          |          |      |          |          |          |          |          |     |          |          |          |          |          |     |          |          |          |          |          |     |          |          |          |          |          |      |          |          |          |          |          |      |          |          |          |          |          |       |          |          |          |          |          |  |   |   |   |   |    |      |          |  |  |  |  |     |          |          |  |  |  |     |          |          |          |  |  |     |          |          |          |          |  |      |          |          |          |          |          |      |          |          |          |          |          |       |          |          |          |          |          |  |    |    |      |          |  |       |          |          |
| 11 B                                                                                                             | 1.858345                                                                                                                                                                                                                                                                                                                                                                                                                                                                                                                                                                                                                                                                                                                                                                                                                                                                                                                                                                                                                                                                                                                                                                                                                                                                                                                                                                                                                                                                                                                                                                                                                                                                                                                                                                                                                                                                                                                                                                                                                                                                                                                                                                                                                                                                                                                                  | 3.239222 | 2.722572 | 2.787919 | 3.108228 |   |   |     |          |  |  |  |  |     |          |          |  |  |  |     |          |          |          |  |  |     |          |          |          |          |  |     |          |          |          |          |          |      |          |          |          |          |          |     |          |          |          |          |          |     |          |          |          |          |          |     |          |          |          |          |          |      |          |          |          |          |          |      |          |          |          |          |          |       |          |          |          |          |          |  |   |   |   |   |    |      |          |  |  |  |  |     |          |          |  |  |  |     |          |          |          |  |  |     |          |          |          |          |  |      |          |          |          |          |          |      |          |          |          |          |          |       |          |          |          |          |          |  |    |    |      |          |  |       |          |          |
| 12 Os                                                                                                            | 2.248859                                                                                                                                                                                                                                                                                                                                                                                                                                                                                                                                                                                                                                                                                                                                                                                                                                                                                                                                                                                                                                                                                                                                                                                                                                                                                                                                                                                                                                                                                                                                                                                                                                                                                                                                                                                                                                                                                                                                                                                                                                                                                                                                                                                                                                                                                                                                  | 3.473513 | 3.474162 | 2.211786 | 3.500524 |   |   |     |          |  |  |  |  |     |          |          |  |  |  |     |          |          |          |  |  |     |          |          |          |          |  |     |          |          |          |          |          |      |          |          |          |          |          |     |          |          |          |          |          |     |          |          |          |          |          |     |          |          |          |          |          |      |          |          |          |          |          |      |          |          |          |          |          |       |          |          |          |          |          |  |   |   |   |   |    |      |          |  |  |  |  |     |          |          |  |  |  |     |          |          |          |  |  |     |          |          |          |          |  |      |          |          |          |          |          |      |          |          |          |          |          |       |          |          |          |          |          |  |    |    |      |          |  |       |          |          |
|                                                                                                                  | 6                                                                                                                                                                                                                                                                                                                                                                                                                                                                                                                                                                                                                                                                                                                                                                                                                                                                                                                                                                                                                                                                                                                                                                                                                                                                                                                                                                                                                                                                                                                                                                                                                                                                                                                                                                                                                                                                                                                                                                                                                                                                                                                                                                                                                                                                                                                                         | 7        | 8        | 9        | 10       |   |   |     |          |  |  |  |  |     |          |          |  |  |  |     |          |          |          |  |  |     |          |          |          |          |  |     |          |          |          |          |          |      |          |          |          |          |          |     |          |          |          |          |          |     |          |          |          |          |          |     |          |          |          |          |          |      |          |          |          |          |          |      |          |          |          |          |          |       |          |          |          |          |          |  |   |   |   |   |    |      |          |  |  |  |  |     |          |          |  |  |  |     |          |          |          |  |  |     |          |          |          |          |  |      |          |          |          |          |          |      |          |          |          |          |          |       |          |          |          |          |          |  |    |    |      |          |  |       |          |          |
| 6 Os                                                                                                             | 0.000000                                                                                                                                                                                                                                                                                                                                                                                                                                                                                                                                                                                                                                                                                                                                                                                                                                                                                                                                                                                                                                                                                                                                                                                                                                                                                                                                                                                                                                                                                                                                                                                                                                                                                                                                                                                                                                                                                                                                                                                                                                                                                                                                                                                                                                                                                                                                  |          |          |          |          |   |   |     |          |  |  |  |  |     |          |          |  |  |  |     |          |          |          |  |  |     |          |          |          |          |  |     |          |          |          |          |          |      |          |          |          |          |          |     |          |          |          |          |          |     |          |          |          |          |          |     |          |          |          |          |          |      |          |          |          |          |          |      |          |          |          |          |          |       |          |          |          |          |          |  |   |   |   |   |    |      |          |  |  |  |  |     |          |          |  |  |  |     |          |          |          |  |  |     |          |          |          |          |  |      |          |          |          |          |          |      |          |          |          |          |          |       |          |          |          |          |          |  |    |    |      |          |  |       |          |          |
| 7 B                                                                                                              | 3.153430                                                                                                                                                                                                                                                                                                                                                                                                                                                                                                                                                                                                                                                                                                                                                                                                                                                                                                                                                                                                                                                                                                                                                                                                                                                                                                                                                                                                                                                                                                                                                                                                                                                                                                                                                                                                                                                                                                                                                                                                                                                                                                                                                                                                                                                                                                                                  | 0.000000 |          |          |          |   |   |     |          |  |  |  |  |     |          |          |  |  |  |     |          |          |          |  |  |     |          |          |          |          |  |     |          |          |          |          |          |      |          |          |          |          |          |     |          |          |          |          |          |     |          |          |          |          |          |     |          |          |          |          |          |      |          |          |          |          |          |      |          |          |          |          |          |       |          |          |          |          |          |  |   |   |   |   |    |      |          |  |  |  |  |     |          |          |  |  |  |     |          |          |          |  |  |     |          |          |          |          |  |      |          |          |          |          |          |      |          |          |          |          |          |       |          |          |          |          |          |  |    |    |      |          |  |       |          |          |
| 8 B                                                                                                              | 2.096304                                                                                                                                                                                                                                                                                                                                                                                                                                                                                                                                                                                                                                                                                                                                                                                                                                                                                                                                                                                                                                                                                                                                                                                                                                                                                                                                                                                                                                                                                                                                                                                                                                                                                                                                                                                                                                                                                                                                                                                                                                                                                                                                                                                                                                                                                                                                  | 3.824943 | 0.000000 |          |          |   |   |     |          |  |  |  |  |     |          |          |  |  |  |     |          |          |          |  |  |     |          |          |          |          |  |     |          |          |          |          |          |      |          |          |          |          |          |     |          |          |          |          |          |     |          |          |          |          |          |     |          |          |          |          |          |      |          |          |          |          |          |      |          |          |          |          |          |       |          |          |          |          |          |  |   |   |   |   |    |      |          |  |  |  |  |     |          |          |  |  |  |     |          |          |          |  |  |     |          |          |          |          |  |      |          |          |          |          |          |      |          |          |          |          |          |       |          |          |          |          |          |  |    |    |      |          |  |       |          |          |
| 9 B                                                                                                              | 4.571542                                                                                                                                                                                                                                                                                                                                                                                                                                                                                                                                                                                                                                                                                                                                                                                                                                                                                                                                                                                                                                                                                                                                                                                                                                                                                                                                                                                                                                                                                                                                                                                                                                                                                                                                                                                                                                                                                                                                                                                                                                                                                                                                                                                                                                                                                                                                  | 1.962713 | 4.376427 | 0.000000 |          |   |   |     |          |  |  |  |  |     |          |          |  |  |  |     |          |          |          |  |  |     |          |          |          |          |  |     |          |          |          |          |          |      |          |          |          |          |          |     |          |          |          |          |          |     |          |          |          |          |          |     |          |          |          |          |          |      |          |          |          |          |          |      |          |          |          |          |          |       |          |          |          |          |          |  |   |   |   |   |    |      |          |  |  |  |  |     |          |          |  |  |  |     |          |          |          |  |  |     |          |          |          |          |  |      |          |          |          |          |          |      |          |          |          |          |          |       |          |          |          |          |          |  |    |    |      |          |  |       |          |          |
| 10 B                                                                                                             | 2.366054                                                                                                                                                                                                                                                                                                                                                                                                                                                                                                                                                                                                                                                                                                                                                                                                                                                                                                                                                                                                                                                                                                                                                                                                                                                                                                                                                                                                                                                                                                                                                                                                                                                                                                                                                                                                                                                                                                                                                                                                                                                                                                                                                                                                                                                                                                                                  | 1.892436 | 3.131511 | 3.331387 | 0.000000 |   |   |     |          |  |  |  |  |     |          |          |  |  |  |     |          |          |          |  |  |     |          |          |          |          |  |     |          |          |          |          |          |      |          |          |          |          |          |     |          |          |          |          |          |     |          |          |          |          |          |     |          |          |          |          |          |      |          |          |          |          |          |      |          |          |          |          |          |       |          |          |          |          |          |  |   |   |   |   |    |      |          |  |  |  |  |     |          |          |  |  |  |     |          |          |          |  |  |     |          |          |          |          |  |      |          |          |          |          |          |      |          |          |          |          |          |       |          |          |          |          |          |  |    |    |      |          |  |       |          |          |
| 11 B                                                                                                             | 2.312230                                                                                                                                                                                                                                                                                                                                                                                                                                                                                                                                                                                                                                                                                                                                                                                                                                                                                                                                                                                                                                                                                                                                                                                                                                                                                                                                                                                                                                                                                                                                                                                                                                                                                                                                                                                                                                                                                                                                                                                                                                                                                                                                                                                                                                                                                                                                  | 3.074754 | 1.747655 | 3.789002 | 1.812094 |   |   |     |          |  |  |  |  |     |          |          |  |  |  |     |          |          |          |  |  |     |          |          |          |          |  |     |          |          |          |          |          |      |          |          |          |          |          |     |          |          |          |          |          |     |          |          |          |          |          |     |          |          |          |          |          |      |          |          |          |          |          |      |          |          |          |          |          |       |          |          |          |          |          |  |   |   |   |   |    |      |          |  |  |  |  |     |          |          |  |  |  |     |          |          |          |  |  |     |          |          |          |          |  |      |          |          |          |          |          |      |          |          |          |          |          |       |          |          |          |          |          |  |    |    |      |          |  |       |          |          |
| 12 Os                                                                                                            | 3.924649                                                                                                                                                                                                                                                                                                                                                                                                                                                                                                                                                                                                                                                                                                                                                                                                                                                                                                                                                                                                                                                                                                                                                                                                                                                                                                                                                                                                                                                                                                                                                                                                                                                                                                                                                                                                                                                                                                                                                                                                                                                                                                                                                                                                                                                                                                                                  | 2.291289 | 3.490548 | 2.039316 | 2.217671 |   |   |     |          |  |  |  |  |     |          |          |  |  |  |     |          |          |          |  |  |     |          |          |          |          |  |     |          |          |          |          |          |      |          |          |          |          |          |     |          |          |          |          |          |     |          |          |          |          |          |     |          |          |          |          |          |      |          |          |          |          |          |      |          |          |          |          |          |       |          |          |          |          |          |  |   |   |   |   |    |      |          |  |  |  |  |     |          |          |  |  |  |     |          |          |          |  |  |     |          |          |          |          |  |      |          |          |          |          |          |      |          |          |          |          |          |       |          |          |          |          |          |  |    |    |      |          |  |       |          |          |
|                                                                                                                  | 11                                                                                                                                                                                                                                                                                                                                                                                                                                                                                                                                                                                                                                                                                                                                                                                                                                                                                                                                                                                                                                                                                                                                                                                                                                                                                                                                                                                                                                                                                                                                                                                                                                                                                                                                                                                                                                                                                                                                                                                                                                                                                                                                                                                                                                                                                                                                        | 12       |          |          |          |   |   |     |          |  |  |  |  |     |          |          |  |  |  |     |          |          |          |  |  |     |          |          |          |          |  |     |          |          |          |          |          |      |          |          |          |          |          |     |          |          |          |          |          |     |          |          |          |          |          |     |          |          |          |          |          |      |          |          |          |          |          |      |          |          |          |          |          |       |          |          |          |          |          |  |   |   |   |   |    |      |          |  |  |  |  |     |          |          |  |  |  |     |          |          |          |  |  |     |          |          |          |          |  |      |          |          |          |          |          |      |          |          |          |          |          |       |          |          |          |          |          |  |    |    |      |          |  |       |          |          |
| 11 B                                                                                                             | 0.000000                                                                                                                                                                                                                                                                                                                                                                                                                                                                                                                                                                                                                                                                                                                                                                                                                                                                                                                                                                                                                                                                                                                                                                                                                                                                                                                                                                                                                                                                                                                                                                                                                                                                                                                                                                                                                                                                                                                                                                                                                                                                                                                                                                                                                                                                                                                                  |          |          |          |          |   |   |     |          |  |  |  |  |     |          |          |  |  |  |     |          |          |          |  |  |     |          |          |          |          |  |     |          |          |          |          |          |      |          |          |          |          |          |     |          |          |          |          |          |     |          |          |          |          |          |     |          |          |          |          |          |      |          |          |          |          |          |      |          |          |          |          |          |       |          |          |          |          |          |  |   |   |   |   |    |      |          |  |  |  |  |     |          |          |  |  |  |     |          |          |          |  |  |     |          |          |          |          |  |      |          |          |          |          |          |      |          |          |          |          |          |       |          |          |          |          |          |  |    |    |      |          |  |       |          |          |
| 12 Os                                                                                                            | 2.278416                                                                                                                                                                                                                                                                                                                                                                                                                                                                                                                                                                                                                                                                                                                                                                                                                                                                                                                                                                                                                                                                                                                                                                                                                                                                                                                                                                                                                                                                                                                                                                                                                                                                                                                                                                                                                                                                                                                                                                                                                                                                                                                                                                                                                                                                                                                                  | 0.000000 |          |          |          |   |   |     |          |  |  |  |  |     |          |          |  |  |  |     |          |          |          |  |  |     |          |          |          |          |  |     |          |          |          |          |          |      |          |          |          |          |          |     |          |          |          |          |          |     |          |          |          |          |          |     |          |          |          |          |          |      |          |          |          |          |          |      |          |          |          |          |          |       |          |          |          |          |          |  |   |   |   |   |    |      |          |  |  |  |  |     |          |          |  |  |  |     |          |          |          |  |  |     |          |          |          |          |  |      |          |          |          |          |          |      |          |          |          |          |          |       |          |          |          |          |          |  |    |    |      |          |  |       |          |          |

| 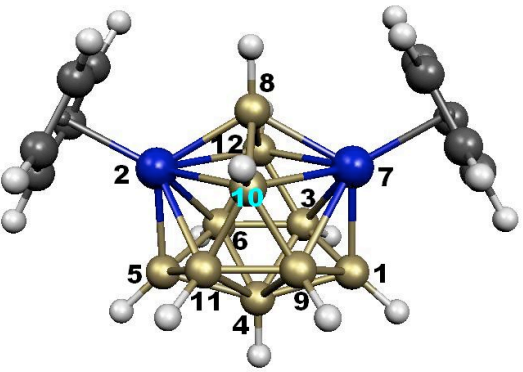 <p>5. -823.22156564 +20.7 C<sub>2v</sub></p> | <table border="1"> <thead> <tr> <th></th> <th>1</th> <th>2</th> <th>3</th> <th>4</th> <th>5</th> </tr> </thead> <tbody> <tr><td>1 B</td><td>0.000000</td><td></td><td></td><td></td><td></td></tr> <tr><td>2 Os</td><td>4.200716</td><td>0.000000</td><td></td><td></td><td></td></tr> <tr><td>3 B</td><td>1.754240</td><td>3.386250</td><td>0.000000</td><td></td><td></td></tr> <tr><td>4 B</td><td>1.895467</td><td>3.191610</td><td>1.932676</td><td>0.000000</td><td></td></tr> <tr><td>5 B</td><td>3.633600</td><td>2.067729</td><td>3.043568</td><td>1.895438</td><td>0.000000</td></tr> <tr><td>6 B</td><td>3.043550</td><td>2.280833</td><td>1.702400</td><td>1.932676</td><td>1.754270</td></tr> <tr><td>7 Os</td><td>2.067629</td><td>3.679800</td><td>2.280833</td><td>3.191610</td><td>4.200765</td></tr> <tr><td>8 B</td><td>3.638546</td><td>2.135991</td><td>3.075886</td><td>3.692900</td><td>3.638633</td></tr> <tr><td>9 B</td><td>1.754270</td><td>3.386205</td><td>2.730000</td><td>1.932731</td><td>3.043585</td></tr> <tr><td>10 B</td><td>3.100021</td><td>2.322319</td><td>3.293255</td><td>2.973714</td><td>3.100087</td></tr> <tr><td>11 B</td><td>3.043568</td><td>2.280766</td><td>3.217307</td><td>1.932731</td><td>1.754300</td></tr> <tr><td>12 B</td><td>3.100021</td><td>2.322319</td><td>1.763154</td><td>2.973714</td><td>3.100087</td></tr> <tr> <th></th> <th>6</th> <th>7</th> <th>8</th> <th>9</th> <th>10</th> </tr> <tr><td>6 B</td><td>0.000000</td><td></td><td></td><td></td><td></td></tr> <tr><td>7 Os</td><td>3.386250</td><td>0.000000</td><td></td><td></td><td></td></tr> <tr><td>8 B</td><td>3.075886</td><td>2.135991</td><td>0.000000</td><td></td><td></td></tr> <tr><td>9 B</td><td>3.217307</td><td>2.280766</td><td>3.075801</td><td>0.000000</td><td></td></tr> <tr><td>10 B</td><td>3.293255</td><td>2.322319</td><td>1.780745</td><td>1.763066</td><td>0.000000</td></tr> <tr><td>11 B</td><td>2.730000</td><td>3.386205</td><td>3.075801</td><td>1.702400</td><td>1.763066</td></tr> <tr><td>12 B</td><td>1.763154</td><td>2.322319</td><td>1.780745</td><td>3.293209</td><td>2.834000</td></tr> <tr> <th></th> <th>11</th> <th>12</th> <th colspan="3"></th> </tr> <tr><td>11 B</td><td>0.000000</td><td></td><td colspan="3"></td></tr> <tr><td>12 B</td><td>3.293209</td><td>0.000000</td><td colspan="3"></td></tr> </tbody> </table> |          | 1        | 2        | 3        | 4 | 5 | 1 B  | 0.000000 |  |  |  |  | 2 Os | 4.200716 | 0.000000 |  |  |  | 3 B | 1.754240 | 3.386250 | 0.000000 |  |  | 4 B | 1.895467 | 3.191610 | 1.932676 | 0.000000 |  | 5 B | 3.633600 | 2.067729 | 3.043568 | 1.895438 | 0.000000 | 6 B | 3.043550 | 2.280833 | 1.702400 | 1.932676 | 1.754270 | 7 Os | 2.067629 | 3.679800 | 2.280833 | 3.191610 | 4.200765 | 8 B | 3.638546 | 2.135991 | 3.075886 | 3.692900 | 3.638633 | 9 B  | 1.754270 | 3.386205 | 2.730000 | 1.932731 | 3.043585 | 10 B | 3.100021 | 2.322319 | 3.293255 | 2.973714 | 3.100087 | 11 B | 3.043568 | 2.280766 | 3.217307 | 1.932731 | 1.754300 | 12 B | 3.100021 | 2.322319 | 1.763154 | 2.973714 | 3.100087 |  | 6 | 7 | 8 | 9 | 10 | 6 B | 0.000000 |  |  |  |  | 7 Os | 3.386250 | 0.000000 |  |  |  | 8 B | 3.075886 | 2.135991 | 0.000000 |  |  | 9 B  | 3.217307 | 2.280766 | 3.075801 | 0.000000 |  | 10 B | 3.293255 | 2.322319 | 1.780745 | 1.763066 | 0.000000 | 11 B | 2.730000 | 3.386205 | 3.075801 | 1.702400 | 1.763066 | 12 B | 1.763154 | 2.322319 | 1.780745 | 3.293209 | 2.834000 |  | 11 | 12 |  |  |  | 11 B | 0.000000 |  |  |  |  | 12 B | 3.293209 | 0.000000 |  |  |  |
|--------------------------------------------------------------------------------------------------------------------------------|---------------------------------------------------------------------------------------------------------------------------------------------------------------------------------------------------------------------------------------------------------------------------------------------------------------------------------------------------------------------------------------------------------------------------------------------------------------------------------------------------------------------------------------------------------------------------------------------------------------------------------------------------------------------------------------------------------------------------------------------------------------------------------------------------------------------------------------------------------------------------------------------------------------------------------------------------------------------------------------------------------------------------------------------------------------------------------------------------------------------------------------------------------------------------------------------------------------------------------------------------------------------------------------------------------------------------------------------------------------------------------------------------------------------------------------------------------------------------------------------------------------------------------------------------------------------------------------------------------------------------------------------------------------------------------------------------------------------------------------------------------------------------------------------------------------------------------------------------------------------------------------------------------------------------------------------------------------------------------------------------------------------------------------------------------------------------------------------------------------------------------------------------------------------------------------------------------------------------------------------------------------------------------------------------------------------------------------------------------------------------------------------------------|----------|----------|----------|----------|---|---|------|----------|--|--|--|--|------|----------|----------|--|--|--|-----|----------|----------|----------|--|--|-----|----------|----------|----------|----------|--|-----|----------|----------|----------|----------|----------|-----|----------|----------|----------|----------|----------|------|----------|----------|----------|----------|----------|-----|----------|----------|----------|----------|----------|------|----------|----------|----------|----------|----------|------|----------|----------|----------|----------|----------|------|----------|----------|----------|----------|----------|------|----------|----------|----------|----------|----------|--|---|---|---|---|----|-----|----------|--|--|--|--|------|----------|----------|--|--|--|-----|----------|----------|----------|--|--|------|----------|----------|----------|----------|--|------|----------|----------|----------|----------|----------|------|----------|----------|----------|----------|----------|------|----------|----------|----------|----------|----------|--|----|----|--|--|--|------|----------|--|--|--|--|------|----------|----------|--|--|--|
|                                                                                                                                | 1                                                                                                                                                                                                                                                                                                                                                                                                                                                                                                                                                                                                                                                                                                                                                                                                                                                                                                                                                                                                                                                                                                                                                                                                                                                                                                                                                                                                                                                                                                                                                                                                                                                                                                                                                                                                                                                                                                                                                                                                                                                                                                                                                                                                                                                                                                                                                                                                       | 2        | 3        | 4        | 5        |   |   |      |          |  |  |  |  |      |          |          |  |  |  |     |          |          |          |  |  |     |          |          |          |          |  |     |          |          |          |          |          |     |          |          |          |          |          |      |          |          |          |          |          |     |          |          |          |          |          |      |          |          |          |          |          |      |          |          |          |          |          |      |          |          |          |          |          |      |          |          |          |          |          |  |   |   |   |   |    |     |          |  |  |  |  |      |          |          |  |  |  |     |          |          |          |  |  |      |          |          |          |          |  |      |          |          |          |          |          |      |          |          |          |          |          |      |          |          |          |          |          |  |    |    |  |  |  |      |          |  |  |  |  |      |          |          |  |  |  |
| 1 B                                                                                                                            | 0.000000                                                                                                                                                                                                                                                                                                                                                                                                                                                                                                                                                                                                                                                                                                                                                                                                                                                                                                                                                                                                                                                                                                                                                                                                                                                                                                                                                                                                                                                                                                                                                                                                                                                                                                                                                                                                                                                                                                                                                                                                                                                                                                                                                                                                                                                                                                                                                                                                |          |          |          |          |   |   |      |          |  |  |  |  |      |          |          |  |  |  |     |          |          |          |  |  |     |          |          |          |          |  |     |          |          |          |          |          |     |          |          |          |          |          |      |          |          |          |          |          |     |          |          |          |          |          |      |          |          |          |          |          |      |          |          |          |          |          |      |          |          |          |          |          |      |          |          |          |          |          |  |   |   |   |   |    |     |          |  |  |  |  |      |          |          |  |  |  |     |          |          |          |  |  |      |          |          |          |          |  |      |          |          |          |          |          |      |          |          |          |          |          |      |          |          |          |          |          |  |    |    |  |  |  |      |          |  |  |  |  |      |          |          |  |  |  |
| 2 Os                                                                                                                           | 4.200716                                                                                                                                                                                                                                                                                                                                                                                                                                                                                                                                                                                                                                                                                                                                                                                                                                                                                                                                                                                                                                                                                                                                                                                                                                                                                                                                                                                                                                                                                                                                                                                                                                                                                                                                                                                                                                                                                                                                                                                                                                                                                                                                                                                                                                                                                                                                                                                                | 0.000000 |          |          |          |   |   |      |          |  |  |  |  |      |          |          |  |  |  |     |          |          |          |  |  |     |          |          |          |          |  |     |          |          |          |          |          |     |          |          |          |          |          |      |          |          |          |          |          |     |          |          |          |          |          |      |          |          |          |          |          |      |          |          |          |          |          |      |          |          |          |          |          |      |          |          |          |          |          |  |   |   |   |   |    |     |          |  |  |  |  |      |          |          |  |  |  |     |          |          |          |  |  |      |          |          |          |          |  |      |          |          |          |          |          |      |          |          |          |          |          |      |          |          |          |          |          |  |    |    |  |  |  |      |          |  |  |  |  |      |          |          |  |  |  |
| 3 B                                                                                                                            | 1.754240                                                                                                                                                                                                                                                                                                                                                                                                                                                                                                                                                                                                                                                                                                                                                                                                                                                                                                                                                                                                                                                                                                                                                                                                                                                                                                                                                                                                                                                                                                                                                                                                                                                                                                                                                                                                                                                                                                                                                                                                                                                                                                                                                                                                                                                                                                                                                                                                | 3.386250 | 0.000000 |          |          |   |   |      |          |  |  |  |  |      |          |          |  |  |  |     |          |          |          |  |  |     |          |          |          |          |  |     |          |          |          |          |          |     |          |          |          |          |          |      |          |          |          |          |          |     |          |          |          |          |          |      |          |          |          |          |          |      |          |          |          |          |          |      |          |          |          |          |          |      |          |          |          |          |          |  |   |   |   |   |    |     |          |  |  |  |  |      |          |          |  |  |  |     |          |          |          |  |  |      |          |          |          |          |  |      |          |          |          |          |          |      |          |          |          |          |          |      |          |          |          |          |          |  |    |    |  |  |  |      |          |  |  |  |  |      |          |          |  |  |  |
| 4 B                                                                                                                            | 1.895467                                                                                                                                                                                                                                                                                                                                                                                                                                                                                                                                                                                                                                                                                                                                                                                                                                                                                                                                                                                                                                                                                                                                                                                                                                                                                                                                                                                                                                                                                                                                                                                                                                                                                                                                                                                                                                                                                                                                                                                                                                                                                                                                                                                                                                                                                                                                                                                                | 3.191610 | 1.932676 | 0.000000 |          |   |   |      |          |  |  |  |  |      |          |          |  |  |  |     |          |          |          |  |  |     |          |          |          |          |  |     |          |          |          |          |          |     |          |          |          |          |          |      |          |          |          |          |          |     |          |          |          |          |          |      |          |          |          |          |          |      |          |          |          |          |          |      |          |          |          |          |          |      |          |          |          |          |          |  |   |   |   |   |    |     |          |  |  |  |  |      |          |          |  |  |  |     |          |          |          |  |  |      |          |          |          |          |  |      |          |          |          |          |          |      |          |          |          |          |          |      |          |          |          |          |          |  |    |    |  |  |  |      |          |  |  |  |  |      |          |          |  |  |  |
| 5 B                                                                                                                            | 3.633600                                                                                                                                                                                                                                                                                                                                                                                                                                                                                                                                                                                                                                                                                                                                                                                                                                                                                                                                                                                                                                                                                                                                                                                                                                                                                                                                                                                                                                                                                                                                                                                                                                                                                                                                                                                                                                                                                                                                                                                                                                                                                                                                                                                                                                                                                                                                                                                                | 2.067729 | 3.043568 | 1.895438 | 0.000000 |   |   |      |          |  |  |  |  |      |          |          |  |  |  |     |          |          |          |  |  |     |          |          |          |          |  |     |          |          |          |          |          |     |          |          |          |          |          |      |          |          |          |          |          |     |          |          |          |          |          |      |          |          |          |          |          |      |          |          |          |          |          |      |          |          |          |          |          |      |          |          |          |          |          |  |   |   |   |   |    |     |          |  |  |  |  |      |          |          |  |  |  |     |          |          |          |  |  |      |          |          |          |          |  |      |          |          |          |          |          |      |          |          |          |          |          |      |          |          |          |          |          |  |    |    |  |  |  |      |          |  |  |  |  |      |          |          |  |  |  |
| 6 B                                                                                                                            | 3.043550                                                                                                                                                                                                                                                                                                                                                                                                                                                                                                                                                                                                                                                                                                                                                                                                                                                                                                                                                                                                                                                                                                                                                                                                                                                                                                                                                                                                                                                                                                                                                                                                                                                                                                                                                                                                                                                                                                                                                                                                                                                                                                                                                                                                                                                                                                                                                                                                | 2.280833 | 1.702400 | 1.932676 | 1.754270 |   |   |      |          |  |  |  |  |      |          |          |  |  |  |     |          |          |          |  |  |     |          |          |          |          |  |     |          |          |          |          |          |     |          |          |          |          |          |      |          |          |          |          |          |     |          |          |          |          |          |      |          |          |          |          |          |      |          |          |          |          |          |      |          |          |          |          |          |      |          |          |          |          |          |  |   |   |   |   |    |     |          |  |  |  |  |      |          |          |  |  |  |     |          |          |          |  |  |      |          |          |          |          |  |      |          |          |          |          |          |      |          |          |          |          |          |      |          |          |          |          |          |  |    |    |  |  |  |      |          |  |  |  |  |      |          |          |  |  |  |
| 7 Os                                                                                                                           | 2.067629                                                                                                                                                                                                                                                                                                                                                                                                                                                                                                                                                                                                                                                                                                                                                                                                                                                                                                                                                                                                                                                                                                                                                                                                                                                                                                                                                                                                                                                                                                                                                                                                                                                                                                                                                                                                                                                                                                                                                                                                                                                                                                                                                                                                                                                                                                                                                                                                | 3.679800 | 2.280833 | 3.191610 | 4.200765 |   |   |      |          |  |  |  |  |      |          |          |  |  |  |     |          |          |          |  |  |     |          |          |          |          |  |     |          |          |          |          |          |     |          |          |          |          |          |      |          |          |          |          |          |     |          |          |          |          |          |      |          |          |          |          |          |      |          |          |          |          |          |      |          |          |          |          |          |      |          |          |          |          |          |  |   |   |   |   |    |     |          |  |  |  |  |      |          |          |  |  |  |     |          |          |          |  |  |      |          |          |          |          |  |      |          |          |          |          |          |      |          |          |          |          |          |      |          |          |          |          |          |  |    |    |  |  |  |      |          |  |  |  |  |      |          |          |  |  |  |
| 8 B                                                                                                                            | 3.638546                                                                                                                                                                                                                                                                                                                                                                                                                                                                                                                                                                                                                                                                                                                                                                                                                                                                                                                                                                                                                                                                                                                                                                                                                                                                                                                                                                                                                                                                                                                                                                                                                                                                                                                                                                                                                                                                                                                                                                                                                                                                                                                                                                                                                                                                                                                                                                                                | 2.135991 | 3.075886 | 3.692900 | 3.638633 |   |   |      |          |  |  |  |  |      |          |          |  |  |  |     |          |          |          |  |  |     |          |          |          |          |  |     |          |          |          |          |          |     |          |          |          |          |          |      |          |          |          |          |          |     |          |          |          |          |          |      |          |          |          |          |          |      |          |          |          |          |          |      |          |          |          |          |          |      |          |          |          |          |          |  |   |   |   |   |    |     |          |  |  |  |  |      |          |          |  |  |  |     |          |          |          |  |  |      |          |          |          |          |  |      |          |          |          |          |          |      |          |          |          |          |          |      |          |          |          |          |          |  |    |    |  |  |  |      |          |  |  |  |  |      |          |          |  |  |  |
| 9 B                                                                                                                            | 1.754270                                                                                                                                                                                                                                                                                                                                                                                                                                                                                                                                                                                                                                                                                                                                                                                                                                                                                                                                                                                                                                                                                                                                                                                                                                                                                                                                                                                                                                                                                                                                                                                                                                                                                                                                                                                                                                                                                                                                                                                                                                                                                                                                                                                                                                                                                                                                                                                                | 3.386205 | 2.730000 | 1.932731 | 3.043585 |   |   |      |          |  |  |  |  |      |          |          |  |  |  |     |          |          |          |  |  |     |          |          |          |          |  |     |          |          |          |          |          |     |          |          |          |          |          |      |          |          |          |          |          |     |          |          |          |          |          |      |          |          |          |          |          |      |          |          |          |          |          |      |          |          |          |          |          |      |          |          |          |          |          |  |   |   |   |   |    |     |          |  |  |  |  |      |          |          |  |  |  |     |          |          |          |  |  |      |          |          |          |          |  |      |          |          |          |          |          |      |          |          |          |          |          |      |          |          |          |          |          |  |    |    |  |  |  |      |          |  |  |  |  |      |          |          |  |  |  |
| 10 B                                                                                                                           | 3.100021                                                                                                                                                                                                                                                                                                                                                                                                                                                                                                                                                                                                                                                                                                                                                                                                                                                                                                                                                                                                                                                                                                                                                                                                                                                                                                                                                                                                                                                                                                                                                                                                                                                                                                                                                                                                                                                                                                                                                                                                                                                                                                                                                                                                                                                                                                                                                                                                | 2.322319 | 3.293255 | 2.973714 | 3.100087 |   |   |      |          |  |  |  |  |      |          |          |  |  |  |     |          |          |          |  |  |     |          |          |          |          |  |     |          |          |          |          |          |     |          |          |          |          |          |      |          |          |          |          |          |     |          |          |          |          |          |      |          |          |          |          |          |      |          |          |          |          |          |      |          |          |          |          |          |      |          |          |          |          |          |  |   |   |   |   |    |     |          |  |  |  |  |      |          |          |  |  |  |     |          |          |          |  |  |      |          |          |          |          |  |      |          |          |          |          |          |      |          |          |          |          |          |      |          |          |          |          |          |  |    |    |  |  |  |      |          |  |  |  |  |      |          |          |  |  |  |
| 11 B                                                                                                                           | 3.043568                                                                                                                                                                                                                                                                                                                                                                                                                                                                                                                                                                                                                                                                                                                                                                                                                                                                                                                                                                                                                                                                                                                                                                                                                                                                                                                                                                                                                                                                                                                                                                                                                                                                                                                                                                                                                                                                                                                                                                                                                                                                                                                                                                                                                                                                                                                                                                                                | 2.280766 | 3.217307 | 1.932731 | 1.754300 |   |   |      |          |  |  |  |  |      |          |          |  |  |  |     |          |          |          |  |  |     |          |          |          |          |  |     |          |          |          |          |          |     |          |          |          |          |          |      |          |          |          |          |          |     |          |          |          |          |          |      |          |          |          |          |          |      |          |          |          |          |          |      |          |          |          |          |          |      |          |          |          |          |          |  |   |   |   |   |    |     |          |  |  |  |  |      |          |          |  |  |  |     |          |          |          |  |  |      |          |          |          |          |  |      |          |          |          |          |          |      |          |          |          |          |          |      |          |          |          |          |          |  |    |    |  |  |  |      |          |  |  |  |  |      |          |          |  |  |  |
| 12 B                                                                                                                           | 3.100021                                                                                                                                                                                                                                                                                                                                                                                                                                                                                                                                                                                                                                                                                                                                                                                                                                                                                                                                                                                                                                                                                                                                                                                                                                                                                                                                                                                                                                                                                                                                                                                                                                                                                                                                                                                                                                                                                                                                                                                                                                                                                                                                                                                                                                                                                                                                                                                                | 2.322319 | 1.763154 | 2.973714 | 3.100087 |   |   |      |          |  |  |  |  |      |          |          |  |  |  |     |          |          |          |  |  |     |          |          |          |          |  |     |          |          |          |          |          |     |          |          |          |          |          |      |          |          |          |          |          |     |          |          |          |          |          |      |          |          |          |          |          |      |          |          |          |          |          |      |          |          |          |          |          |      |          |          |          |          |          |  |   |   |   |   |    |     |          |  |  |  |  |      |          |          |  |  |  |     |          |          |          |  |  |      |          |          |          |          |  |      |          |          |          |          |          |      |          |          |          |          |          |      |          |          |          |          |          |  |    |    |  |  |  |      |          |  |  |  |  |      |          |          |  |  |  |
|                                                                                                                                | 6                                                                                                                                                                                                                                                                                                                                                                                                                                                                                                                                                                                                                                                                                                                                                                                                                                                                                                                                                                                                                                                                                                                                                                                                                                                                                                                                                                                                                                                                                                                                                                                                                                                                                                                                                                                                                                                                                                                                                                                                                                                                                                                                                                                                                                                                                                                                                                                                       | 7        | 8        | 9        | 10       |   |   |      |          |  |  |  |  |      |          |          |  |  |  |     |          |          |          |  |  |     |          |          |          |          |  |     |          |          |          |          |          |     |          |          |          |          |          |      |          |          |          |          |          |     |          |          |          |          |          |      |          |          |          |          |          |      |          |          |          |          |          |      |          |          |          |          |          |      |          |          |          |          |          |  |   |   |   |   |    |     |          |  |  |  |  |      |          |          |  |  |  |     |          |          |          |  |  |      |          |          |          |          |  |      |          |          |          |          |          |      |          |          |          |          |          |      |          |          |          |          |          |  |    |    |  |  |  |      |          |  |  |  |  |      |          |          |  |  |  |
| 6 B                                                                                                                            | 0.000000                                                                                                                                                                                                                                                                                                                                                                                                                                                                                                                                                                                                                                                                                                                                                                                                                                                                                                                                                                                                                                                                                                                                                                                                                                                                                                                                                                                                                                                                                                                                                                                                                                                                                                                                                                                                                                                                                                                                                                                                                                                                                                                                                                                                                                                                                                                                                                                                |          |          |          |          |   |   |      |          |  |  |  |  |      |          |          |  |  |  |     |          |          |          |  |  |     |          |          |          |          |  |     |          |          |          |          |          |     |          |          |          |          |          |      |          |          |          |          |          |     |          |          |          |          |          |      |          |          |          |          |          |      |          |          |          |          |          |      |          |          |          |          |          |      |          |          |          |          |          |  |   |   |   |   |    |     |          |  |  |  |  |      |          |          |  |  |  |     |          |          |          |  |  |      |          |          |          |          |  |      |          |          |          |          |          |      |          |          |          |          |          |      |          |          |          |          |          |  |    |    |  |  |  |      |          |  |  |  |  |      |          |          |  |  |  |
| 7 Os                                                                                                                           | 3.386250                                                                                                                                                                                                                                                                                                                                                                                                                                                                                                                                                                                                                                                                                                                                                                                                                                                                                                                                                                                                                                                                                                                                                                                                                                                                                                                                                                                                                                                                                                                                                                                                                                                                                                                                                                                                                                                                                                                                                                                                                                                                                                                                                                                                                                                                                                                                                                                                | 0.000000 |          |          |          |   |   |      |          |  |  |  |  |      |          |          |  |  |  |     |          |          |          |  |  |     |          |          |          |          |  |     |          |          |          |          |          |     |          |          |          |          |          |      |          |          |          |          |          |     |          |          |          |          |          |      |          |          |          |          |          |      |          |          |          |          |          |      |          |          |          |          |          |      |          |          |          |          |          |  |   |   |   |   |    |     |          |  |  |  |  |      |          |          |  |  |  |     |          |          |          |  |  |      |          |          |          |          |  |      |          |          |          |          |          |      |          |          |          |          |          |      |          |          |          |          |          |  |    |    |  |  |  |      |          |  |  |  |  |      |          |          |  |  |  |
| 8 B                                                                                                                            | 3.075886                                                                                                                                                                                                                                                                                                                                                                                                                                                                                                                                                                                                                                                                                                                                                                                                                                                                                                                                                                                                                                                                                                                                                                                                                                                                                                                                                                                                                                                                                                                                                                                                                                                                                                                                                                                                                                                                                                                                                                                                                                                                                                                                                                                                                                                                                                                                                                                                | 2.135991 | 0.000000 |          |          |   |   |      |          |  |  |  |  |      |          |          |  |  |  |     |          |          |          |  |  |     |          |          |          |          |  |     |          |          |          |          |          |     |          |          |          |          |          |      |          |          |          |          |          |     |          |          |          |          |          |      |          |          |          |          |          |      |          |          |          |          |          |      |          |          |          |          |          |      |          |          |          |          |          |  |   |   |   |   |    |     |          |  |  |  |  |      |          |          |  |  |  |     |          |          |          |  |  |      |          |          |          |          |  |      |          |          |          |          |          |      |          |          |          |          |          |      |          |          |          |          |          |  |    |    |  |  |  |      |          |  |  |  |  |      |          |          |  |  |  |
| 9 B                                                                                                                            | 3.217307                                                                                                                                                                                                                                                                                                                                                                                                                                                                                                                                                                                                                                                                                                                                                                                                                                                                                                                                                                                                                                                                                                                                                                                                                                                                                                                                                                                                                                                                                                                                                                                                                                                                                                                                                                                                                                                                                                                                                                                                                                                                                                                                                                                                                                                                                                                                                                                                | 2.280766 | 3.075801 | 0.000000 |          |   |   |      |          |  |  |  |  |      |          |          |  |  |  |     |          |          |          |  |  |     |          |          |          |          |  |     |          |          |          |          |          |     |          |          |          |          |          |      |          |          |          |          |          |     |          |          |          |          |          |      |          |          |          |          |          |      |          |          |          |          |          |      |          |          |          |          |          |      |          |          |          |          |          |  |   |   |   |   |    |     |          |  |  |  |  |      |          |          |  |  |  |     |          |          |          |  |  |      |          |          |          |          |  |      |          |          |          |          |          |      |          |          |          |          |          |      |          |          |          |          |          |  |    |    |  |  |  |      |          |  |  |  |  |      |          |          |  |  |  |
| 10 B                                                                                                                           | 3.293255                                                                                                                                                                                                                                                                                                                                                                                                                                                                                                                                                                                                                                                                                                                                                                                                                                                                                                                                                                                                                                                                                                                                                                                                                                                                                                                                                                                                                                                                                                                                                                                                                                                                                                                                                                                                                                                                                                                                                                                                                                                                                                                                                                                                                                                                                                                                                                                                | 2.322319 | 1.780745 | 1.763066 | 0.000000 |   |   |      |          |  |  |  |  |      |          |          |  |  |  |     |          |          |          |  |  |     |          |          |          |          |  |     |          |          |          |          |          |     |          |          |          |          |          |      |          |          |          |          |          |     |          |          |          |          |          |      |          |          |          |          |          |      |          |          |          |          |          |      |          |          |          |          |          |      |          |          |          |          |          |  |   |   |   |   |    |     |          |  |  |  |  |      |          |          |  |  |  |     |          |          |          |  |  |      |          |          |          |          |  |      |          |          |          |          |          |      |          |          |          |          |          |      |          |          |          |          |          |  |    |    |  |  |  |      |          |  |  |  |  |      |          |          |  |  |  |
| 11 B                                                                                                                           | 2.730000                                                                                                                                                                                                                                                                                                                                                                                                                                                                                                                                                                                                                                                                                                                                                                                                                                                                                                                                                                                                                                                                                                                                                                                                                                                                                                                                                                                                                                                                                                                                                                                                                                                                                                                                                                                                                                                                                                                                                                                                                                                                                                                                                                                                                                                                                                                                                                                                | 3.386205 | 3.075801 | 1.702400 | 1.763066 |   |   |      |          |  |  |  |  |      |          |          |  |  |  |     |          |          |          |  |  |     |          |          |          |          |  |     |          |          |          |          |          |     |          |          |          |          |          |      |          |          |          |          |          |     |          |          |          |          |          |      |          |          |          |          |          |      |          |          |          |          |          |      |          |          |          |          |          |      |          |          |          |          |          |  |   |   |   |   |    |     |          |  |  |  |  |      |          |          |  |  |  |     |          |          |          |  |  |      |          |          |          |          |  |      |          |          |          |          |          |      |          |          |          |          |          |      |          |          |          |          |          |  |    |    |  |  |  |      |          |  |  |  |  |      |          |          |  |  |  |
| 12 B                                                                                                                           | 1.763154                                                                                                                                                                                                                                                                                                                                                                                                                                                                                                                                                                                                                                                                                                                                                                                                                                                                                                                                                                                                                                                                                                                                                                                                                                                                                                                                                                                                                                                                                                                                                                                                                                                                                                                                                                                                                                                                                                                                                                                                                                                                                                                                                                                                                                                                                                                                                                                                | 2.322319 | 1.780745 | 3.293209 | 2.834000 |   |   |      |          |  |  |  |  |      |          |          |  |  |  |     |          |          |          |  |  |     |          |          |          |          |  |     |          |          |          |          |          |     |          |          |          |          |          |      |          |          |          |          |          |     |          |          |          |          |          |      |          |          |          |          |          |      |          |          |          |          |          |      |          |          |          |          |          |      |          |          |          |          |          |  |   |   |   |   |    |     |          |  |  |  |  |      |          |          |  |  |  |     |          |          |          |  |  |      |          |          |          |          |  |      |          |          |          |          |          |      |          |          |          |          |          |      |          |          |          |          |          |  |    |    |  |  |  |      |          |  |  |  |  |      |          |          |  |  |  |
|                                                                                                                                | 11                                                                                                                                                                                                                                                                                                                                                                                                                                                                                                                                                                                                                                                                                                                                                                                                                                                                                                                                                                                                                                                                                                                                                                                                                                                                                                                                                                                                                                                                                                                                                                                                                                                                                                                                                                                                                                                                                                                                                                                                                                                                                                                                                                                                                                                                                                                                                                                                      | 12       |          |          |          |   |   |      |          |  |  |  |  |      |          |          |  |  |  |     |          |          |          |  |  |     |          |          |          |          |  |     |          |          |          |          |          |     |          |          |          |          |          |      |          |          |          |          |          |     |          |          |          |          |          |      |          |          |          |          |          |      |          |          |          |          |          |      |          |          |          |          |          |      |          |          |          |          |          |  |   |   |   |   |    |     |          |  |  |  |  |      |          |          |  |  |  |     |          |          |          |  |  |      |          |          |          |          |  |      |          |          |          |          |          |      |          |          |          |          |          |      |          |          |          |          |          |  |    |    |  |  |  |      |          |  |  |  |  |      |          |          |  |  |  |
| 11 B                                                                                                                           | 0.000000                                                                                                                                                                                                                                                                                                                                                                                                                                                                                                                                                                                                                                                                                                                                                                                                                                                                                                                                                                                                                                                                                                                                                                                                                                                                                                                                                                                                                                                                                                                                                                                                                                                                                                                                                                                                                                                                                                                                                                                                                                                                                                                                                                                                                                                                                                                                                                                                |          |          |          |          |   |   |      |          |  |  |  |  |      |          |          |  |  |  |     |          |          |          |  |  |     |          |          |          |          |  |     |          |          |          |          |          |     |          |          |          |          |          |      |          |          |          |          |          |     |          |          |          |          |          |      |          |          |          |          |          |      |          |          |          |          |          |      |          |          |          |          |          |      |          |          |          |          |          |  |   |   |   |   |    |     |          |  |  |  |  |      |          |          |  |  |  |     |          |          |          |  |  |      |          |          |          |          |  |      |          |          |          |          |          |      |          |          |          |          |          |      |          |          |          |          |          |  |    |    |  |  |  |      |          |  |  |  |  |      |          |          |  |  |  |
| 12 B                                                                                                                           | 3.293209                                                                                                                                                                                                                                                                                                                                                                                                                                                                                                                                                                                                                                                                                                                                                                                                                                                                                                                                                                                                                                                                                                                                                                                                                                                                                                                                                                                                                                                                                                                                                                                                                                                                                                                                                                                                                                                                                                                                                                                                                                                                                                                                                                                                                                                                                                                                                                                                | 0.000000 |          |          |          |   |   |      |          |  |  |  |  |      |          |          |  |  |  |     |          |          |          |  |  |     |          |          |          |          |  |     |          |          |          |          |          |     |          |          |          |          |          |      |          |          |          |          |          |     |          |          |          |          |          |      |          |          |          |          |          |      |          |          |          |          |          |      |          |          |          |          |          |      |          |          |          |          |          |  |   |   |   |   |    |     |          |  |  |  |  |      |          |          |  |  |  |     |          |          |          |  |  |      |          |          |          |          |  |      |          |          |          |          |          |      |          |          |          |          |          |      |          |          |          |          |          |  |    |    |  |  |  |      |          |  |  |  |  |      |          |          |  |  |  |
|  <p>6. -823.22011969 +21.63</p>              | <table border="1"> <thead> <tr> <th></th> <th>1</th> <th>2</th> <th>3</th> <th>4</th> <th>5</th> </tr> </thead> <tbody> <tr><td>1 Os</td><td>0.000000</td><td></td><td></td><td></td><td></td></tr> <tr><td>2 B</td><td>3.455323</td><td>0.000000</td><td></td><td></td><td></td></tr> <tr><td>3 B</td><td>2.317115</td><td>1.799152</td><td>0.000000</td><td></td><td></td></tr> <tr><td>4 B</td><td>2.248623</td><td>1.747966</td><td>1.752477</td><td>0.000000</td><td></td></tr> <tr><td>5 B</td><td>3.624486</td><td>1.795936</td><td>2.874703</td><td>2.628359</td><td>0.000000</td></tr> <tr><td>6 B</td><td>3.174693</td><td>1.765070</td><td>1.784732</td><td>2.700268</td><td>1.765229</td></tr> <tr><td>7 B</td><td>3.625091</td><td>1.788137</td><td>3.071123</td><td>1.845347</td><td>1.763358</td></tr> <tr><td>8 B</td><td>2.053266</td><td>2.964150</td><td>1.783108</td><td>2.900615</td><td>2.988727</td></tr> <tr><td>9 Os</td><td>2.864821</td><td>3.443361</td><td>3.688004</td><td>2.053358</td><td>3.468176</td></tr> <tr><td>10 B</td><td>3.233326</td><td>2.916900</td><td>3.600463</td><td>2.641783</td><td>1.753892</td></tr> <tr><td>11 B</td><td>2.406402</td><td>2.903630</td><td>2.775687</td><td>2.819093</td><td>1.894066</td></tr> <tr><td>12 B</td><td>2.076146</td><td>3.801666</td><td>3.598175</td><td>2.824078</td><td>3.074093</td></tr> <tr> <th></th> <th>6</th> <th>7</th> <th>8</th> <th>9</th> <th>10</th> </tr> <tr><td>6 B</td><td>0.000000</td><td></td><td></td><td></td><td></td></tr> <tr><td>7 B</td><td>2.962722</td><td>0.000000</td><td></td><td></td><td></td></tr> <tr><td>8 B</td><td>1.722699</td><td>3.862514</td><td>0.000000</td><td></td><td></td></tr> <tr><td>9 Os</td><td>4.257665</td><td>2.255913</td><td>4.247118</td><td>0.000000</td><td></td></tr> <tr><td>10 B</td><td>3.092697</td><td>1.774426</td><td>3.538575</td><td>2.303007</td><td>0.000000</td></tr> <tr><td>11 B</td><td>2.003977</td><td>2.925396</td><td>1.890831</td><td>3.393318</td><td>1.904336</td></tr> <tr><td>12 B</td><td>3.602713</td><td>3.086959</td><td>3.114853</td><td>2.226990</td><td>1.812175</td></tr> <tr> <th></th> <th>11</th> <th>12</th> <th colspan="3"></th> </tr> <tr><td>11 B</td><td>0.000000</td><td></td><td colspan="3"></td></tr> <tr><td>12 B</td><td>1.879480</td><td>0.000000</td><td colspan="3"></td></tr> </tbody> </table> |          | 1        | 2        | 3        | 4 | 5 | 1 Os | 0.000000 |  |  |  |  | 2 B  | 3.455323 | 0.000000 |  |  |  | 3 B | 2.317115 | 1.799152 | 0.000000 |  |  | 4 B | 2.248623 | 1.747966 | 1.752477 | 0.000000 |  | 5 B | 3.624486 | 1.795936 | 2.874703 | 2.628359 | 0.000000 | 6 B | 3.174693 | 1.765070 | 1.784732 | 2.700268 | 1.765229 | 7 B  | 3.625091 | 1.788137 | 3.071123 | 1.845347 | 1.763358 | 8 B | 2.053266 | 2.964150 | 1.783108 | 2.900615 | 2.988727 | 9 Os | 2.864821 | 3.443361 | 3.688004 | 2.053358 | 3.468176 | 10 B | 3.233326 | 2.916900 | 3.600463 | 2.641783 | 1.753892 | 11 B | 2.406402 | 2.903630 | 2.775687 | 2.819093 | 1.894066 | 12 B | 2.076146 | 3.801666 | 3.598175 | 2.824078 | 3.074093 |  | 6 | 7 | 8 | 9 | 10 | 6 B | 0.000000 |  |  |  |  | 7 B  | 2.962722 | 0.000000 |  |  |  | 8 B | 1.722699 | 3.862514 | 0.000000 |  |  | 9 Os | 4.257665 | 2.255913 | 4.247118 | 0.000000 |  | 10 B | 3.092697 | 1.774426 | 3.538575 | 2.303007 | 0.000000 | 11 B | 2.003977 | 2.925396 | 1.890831 | 3.393318 | 1.904336 | 12 B | 3.602713 | 3.086959 | 3.114853 | 2.226990 | 1.812175 |  | 11 | 12 |  |  |  | 11 B | 0.000000 |  |  |  |  | 12 B | 1.879480 | 0.000000 |  |  |  |
|                                                                                                                                | 1                                                                                                                                                                                                                                                                                                                                                                                                                                                                                                                                                                                                                                                                                                                                                                                                                                                                                                                                                                                                                                                                                                                                                                                                                                                                                                                                                                                                                                                                                                                                                                                                                                                                                                                                                                                                                                                                                                                                                                                                                                                                                                                                                                                                                                                                                                                                                                                                       | 2        | 3        | 4        | 5        |   |   |      |          |  |  |  |  |      |          |          |  |  |  |     |          |          |          |  |  |     |          |          |          |          |  |     |          |          |          |          |          |     |          |          |          |          |          |      |          |          |          |          |          |     |          |          |          |          |          |      |          |          |          |          |          |      |          |          |          |          |          |      |          |          |          |          |          |      |          |          |          |          |          |  |   |   |   |   |    |     |          |  |  |  |  |      |          |          |  |  |  |     |          |          |          |  |  |      |          |          |          |          |  |      |          |          |          |          |          |      |          |          |          |          |          |      |          |          |          |          |          |  |    |    |  |  |  |      |          |  |  |  |  |      |          |          |  |  |  |
| 1 Os                                                                                                                           | 0.000000                                                                                                                                                                                                                                                                                                                                                                                                                                                                                                                                                                                                                                                                                                                                                                                                                                                                                                                                                                                                                                                                                                                                                                                                                                                                                                                                                                                                                                                                                                                                                                                                                                                                                                                                                                                                                                                                                                                                                                                                                                                                                                                                                                                                                                                                                                                                                                                                |          |          |          |          |   |   |      |          |  |  |  |  |      |          |          |  |  |  |     |          |          |          |  |  |     |          |          |          |          |  |     |          |          |          |          |          |     |          |          |          |          |          |      |          |          |          |          |          |     |          |          |          |          |          |      |          |          |          |          |          |      |          |          |          |          |          |      |          |          |          |          |          |      |          |          |          |          |          |  |   |   |   |   |    |     |          |  |  |  |  |      |          |          |  |  |  |     |          |          |          |  |  |      |          |          |          |          |  |      |          |          |          |          |          |      |          |          |          |          |          |      |          |          |          |          |          |  |    |    |  |  |  |      |          |  |  |  |  |      |          |          |  |  |  |
| 2 B                                                                                                                            | 3.455323                                                                                                                                                                                                                                                                                                                                                                                                                                                                                                                                                                                                                                                                                                                                                                                                                                                                                                                                                                                                                                                                                                                                                                                                                                                                                                                                                                                                                                                                                                                                                                                                                                                                                                                                                                                                                                                                                                                                                                                                                                                                                                                                                                                                                                                                                                                                                                                                | 0.000000 |          |          |          |   |   |      |          |  |  |  |  |      |          |          |  |  |  |     |          |          |          |  |  |     |          |          |          |          |  |     |          |          |          |          |          |     |          |          |          |          |          |      |          |          |          |          |          |     |          |          |          |          |          |      |          |          |          |          |          |      |          |          |          |          |          |      |          |          |          |          |          |      |          |          |          |          |          |  |   |   |   |   |    |     |          |  |  |  |  |      |          |          |  |  |  |     |          |          |          |  |  |      |          |          |          |          |  |      |          |          |          |          |          |      |          |          |          |          |          |      |          |          |          |          |          |  |    |    |  |  |  |      |          |  |  |  |  |      |          |          |  |  |  |
| 3 B                                                                                                                            | 2.317115                                                                                                                                                                                                                                                                                                                                                                                                                                                                                                                                                                                                                                                                                                                                                                                                                                                                                                                                                                                                                                                                                                                                                                                                                                                                                                                                                                                                                                                                                                                                                                                                                                                                                                                                                                                                                                                                                                                                                                                                                                                                                                                                                                                                                                                                                                                                                                                                | 1.799152 | 0.000000 |          |          |   |   |      |          |  |  |  |  |      |          |          |  |  |  |     |          |          |          |  |  |     |          |          |          |          |  |     |          |          |          |          |          |     |          |          |          |          |          |      |          |          |          |          |          |     |          |          |          |          |          |      |          |          |          |          |          |      |          |          |          |          |          |      |          |          |          |          |          |      |          |          |          |          |          |  |   |   |   |   |    |     |          |  |  |  |  |      |          |          |  |  |  |     |          |          |          |  |  |      |          |          |          |          |  |      |          |          |          |          |          |      |          |          |          |          |          |      |          |          |          |          |          |  |    |    |  |  |  |      |          |  |  |  |  |      |          |          |  |  |  |
| 4 B                                                                                                                            | 2.248623                                                                                                                                                                                                                                                                                                                                                                                                                                                                                                                                                                                                                                                                                                                                                                                                                                                                                                                                                                                                                                                                                                                                                                                                                                                                                                                                                                                                                                                                                                                                                                                                                                                                                                                                                                                                                                                                                                                                                                                                                                                                                                                                                                                                                                                                                                                                                                                                | 1.747966 | 1.752477 | 0.000000 |          |   |   |      |          |  |  |  |  |      |          |          |  |  |  |     |          |          |          |  |  |     |          |          |          |          |  |     |          |          |          |          |          |     |          |          |          |          |          |      |          |          |          |          |          |     |          |          |          |          |          |      |          |          |          |          |          |      |          |          |          |          |          |      |          |          |          |          |          |      |          |          |          |          |          |  |   |   |   |   |    |     |          |  |  |  |  |      |          |          |  |  |  |     |          |          |          |  |  |      |          |          |          |          |  |      |          |          |          |          |          |      |          |          |          |          |          |      |          |          |          |          |          |  |    |    |  |  |  |      |          |  |  |  |  |      |          |          |  |  |  |
| 5 B                                                                                                                            | 3.624486                                                                                                                                                                                                                                                                                                                                                                                                                                                                                                                                                                                                                                                                                                                                                                                                                                                                                                                                                                                                                                                                                                                                                                                                                                                                                                                                                                                                                                                                                                                                                                                                                                                                                                                                                                                                                                                                                                                                                                                                                                                                                                                                                                                                                                                                                                                                                                                                | 1.795936 | 2.874703 | 2.628359 | 0.000000 |   |   |      |          |  |  |  |  |      |          |          |  |  |  |     |          |          |          |  |  |     |          |          |          |          |  |     |          |          |          |          |          |     |          |          |          |          |          |      |          |          |          |          |          |     |          |          |          |          |          |      |          |          |          |          |          |      |          |          |          |          |          |      |          |          |          |          |          |      |          |          |          |          |          |  |   |   |   |   |    |     |          |  |  |  |  |      |          |          |  |  |  |     |          |          |          |  |  |      |          |          |          |          |  |      |          |          |          |          |          |      |          |          |          |          |          |      |          |          |          |          |          |  |    |    |  |  |  |      |          |  |  |  |  |      |          |          |  |  |  |
| 6 B                                                                                                                            | 3.174693                                                                                                                                                                                                                                                                                                                                                                                                                                                                                                                                                                                                                                                                                                                                                                                                                                                                                                                                                                                                                                                                                                                                                                                                                                                                                                                                                                                                                                                                                                                                                                                                                                                                                                                                                                                                                                                                                                                                                                                                                                                                                                                                                                                                                                                                                                                                                                                                | 1.765070 | 1.784732 | 2.700268 | 1.765229 |   |   |      |          |  |  |  |  |      |          |          |  |  |  |     |          |          |          |  |  |     |          |          |          |          |  |     |          |          |          |          |          |     |          |          |          |          |          |      |          |          |          |          |          |     |          |          |          |          |          |      |          |          |          |          |          |      |          |          |          |          |          |      |          |          |          |          |          |      |          |          |          |          |          |  |   |   |   |   |    |     |          |  |  |  |  |      |          |          |  |  |  |     |          |          |          |  |  |      |          |          |          |          |  |      |          |          |          |          |          |      |          |          |          |          |          |      |          |          |          |          |          |  |    |    |  |  |  |      |          |  |  |  |  |      |          |          |  |  |  |
| 7 B                                                                                                                            | 3.625091                                                                                                                                                                                                                                                                                                                                                                                                                                                                                                                                                                                                                                                                                                                                                                                                                                                                                                                                                                                                                                                                                                                                                                                                                                                                                                                                                                                                                                                                                                                                                                                                                                                                                                                                                                                                                                                                                                                                                                                                                                                                                                                                                                                                                                                                                                                                                                                                | 1.788137 | 3.071123 | 1.845347 | 1.763358 |   |   |      |          |  |  |  |  |      |          |          |  |  |  |     |          |          |          |  |  |     |          |          |          |          |  |     |          |          |          |          |          |     |          |          |          |          |          |      |          |          |          |          |          |     |          |          |          |          |          |      |          |          |          |          |          |      |          |          |          |          |          |      |          |          |          |          |          |      |          |          |          |          |          |  |   |   |   |   |    |     |          |  |  |  |  |      |          |          |  |  |  |     |          |          |          |  |  |      |          |          |          |          |  |      |          |          |          |          |          |      |          |          |          |          |          |      |          |          |          |          |          |  |    |    |  |  |  |      |          |  |  |  |  |      |          |          |  |  |  |
| 8 B                                                                                                                            | 2.053266                                                                                                                                                                                                                                                                                                                                                                                                                                                                                                                                                                                                                                                                                                                                                                                                                                                                                                                                                                                                                                                                                                                                                                                                                                                                                                                                                                                                                                                                                                                                                                                                                                                                                                                                                                                                                                                                                                                                                                                                                                                                                                                                                                                                                                                                                                                                                                                                | 2.964150 | 1.783108 | 2.900615 | 2.988727 |   |   |      |          |  |  |  |  |      |          |          |  |  |  |     |          |          |          |  |  |     |          |          |          |          |  |     |          |          |          |          |          |     |          |          |          |          |          |      |          |          |          |          |          |     |          |          |          |          |          |      |          |          |          |          |          |      |          |          |          |          |          |      |          |          |          |          |          |      |          |          |          |          |          |  |   |   |   |   |    |     |          |  |  |  |  |      |          |          |  |  |  |     |          |          |          |  |  |      |          |          |          |          |  |      |          |          |          |          |          |      |          |          |          |          |          |      |          |          |          |          |          |  |    |    |  |  |  |      |          |  |  |  |  |      |          |          |  |  |  |
| 9 Os                                                                                                                           | 2.864821                                                                                                                                                                                                                                                                                                                                                                                                                                                                                                                                                                                                                                                                                                                                                                                                                                                                                                                                                                                                                                                                                                                                                                                                                                                                                                                                                                                                                                                                                                                                                                                                                                                                                                                                                                                                                                                                                                                                                                                                                                                                                                                                                                                                                                                                                                                                                                                                | 3.443361 | 3.688004 | 2.053358 | 3.468176 |   |   |      |          |  |  |  |  |      |          |          |  |  |  |     |          |          |          |  |  |     |          |          |          |          |  |     |          |          |          |          |          |     |          |          |          |          |          |      |          |          |          |          |          |     |          |          |          |          |          |      |          |          |          |          |          |      |          |          |          |          |          |      |          |          |          |          |          |      |          |          |          |          |          |  |   |   |   |   |    |     |          |  |  |  |  |      |          |          |  |  |  |     |          |          |          |  |  |      |          |          |          |          |  |      |          |          |          |          |          |      |          |          |          |          |          |      |          |          |          |          |          |  |    |    |  |  |  |      |          |  |  |  |  |      |          |          |  |  |  |
| 10 B                                                                                                                           | 3.233326                                                                                                                                                                                                                                                                                                                                                                                                                                                                                                                                                                                                                                                                                                                                                                                                                                                                                                                                                                                                                                                                                                                                                                                                                                                                                                                                                                                                                                                                                                                                                                                                                                                                                                                                                                                                                                                                                                                                                                                                                                                                                                                                                                                                                                                                                                                                                                                                | 2.916900 | 3.600463 | 2.641783 | 1.753892 |   |   |      |          |  |  |  |  |      |          |          |  |  |  |     |          |          |          |  |  |     |          |          |          |          |  |     |          |          |          |          |          |     |          |          |          |          |          |      |          |          |          |          |          |     |          |          |          |          |          |      |          |          |          |          |          |      |          |          |          |          |          |      |          |          |          |          |          |      |          |          |          |          |          |  |   |   |   |   |    |     |          |  |  |  |  |      |          |          |  |  |  |     |          |          |          |  |  |      |          |          |          |          |  |      |          |          |          |          |          |      |          |          |          |          |          |      |          |          |          |          |          |  |    |    |  |  |  |      |          |  |  |  |  |      |          |          |  |  |  |
| 11 B                                                                                                                           | 2.406402                                                                                                                                                                                                                                                                                                                                                                                                                                                                                                                                                                                                                                                                                                                                                                                                                                                                                                                                                                                                                                                                                                                                                                                                                                                                                                                                                                                                                                                                                                                                                                                                                                                                                                                                                                                                                                                                                                                                                                                                                                                                                                                                                                                                                                                                                                                                                                                                | 2.903630 | 2.775687 | 2.819093 | 1.894066 |   |   |      |          |  |  |  |  |      |          |          |  |  |  |     |          |          |          |  |  |     |          |          |          |          |  |     |          |          |          |          |          |     |          |          |          |          |          |      |          |          |          |          |          |     |          |          |          |          |          |      |          |          |          |          |          |      |          |          |          |          |          |      |          |          |          |          |          |      |          |          |          |          |          |  |   |   |   |   |    |     |          |  |  |  |  |      |          |          |  |  |  |     |          |          |          |  |  |      |          |          |          |          |  |      |          |          |          |          |          |      |          |          |          |          |          |      |          |          |          |          |          |  |    |    |  |  |  |      |          |  |  |  |  |      |          |          |  |  |  |
| 12 B                                                                                                                           | 2.076146                                                                                                                                                                                                                                                                                                                                                                                                                                                                                                                                                                                                                                                                                                                                                                                                                                                                                                                                                                                                                                                                                                                                                                                                                                                                                                                                                                                                                                                                                                                                                                                                                                                                                                                                                                                                                                                                                                                                                                                                                                                                                                                                                                                                                                                                                                                                                                                                | 3.801666 | 3.598175 | 2.824078 | 3.074093 |   |   |      |          |  |  |  |  |      |          |          |  |  |  |     |          |          |          |  |  |     |          |          |          |          |  |     |          |          |          |          |          |     |          |          |          |          |          |      |          |          |          |          |          |     |          |          |          |          |          |      |          |          |          |          |          |      |          |          |          |          |          |      |          |          |          |          |          |      |          |          |          |          |          |  |   |   |   |   |    |     |          |  |  |  |  |      |          |          |  |  |  |     |          |          |          |  |  |      |          |          |          |          |  |      |          |          |          |          |          |      |          |          |          |          |          |      |          |          |          |          |          |  |    |    |  |  |  |      |          |  |  |  |  |      |          |          |  |  |  |
|                                                                                                                                | 6                                                                                                                                                                                                                                                                                                                                                                                                                                                                                                                                                                                                                                                                                                                                                                                                                                                                                                                                                                                                                                                                                                                                                                                                                                                                                                                                                                                                                                                                                                                                                                                                                                                                                                                                                                                                                                                                                                                                                                                                                                                                                                                                                                                                                                                                                                                                                                                                       | 7        | 8        | 9        | 10       |   |   |      |          |  |  |  |  |      |          |          |  |  |  |     |          |          |          |  |  |     |          |          |          |          |  |     |          |          |          |          |          |     |          |          |          |          |          |      |          |          |          |          |          |     |          |          |          |          |          |      |          |          |          |          |          |      |          |          |          |          |          |      |          |          |          |          |          |      |          |          |          |          |          |  |   |   |   |   |    |     |          |  |  |  |  |      |          |          |  |  |  |     |          |          |          |  |  |      |          |          |          |          |  |      |          |          |          |          |          |      |          |          |          |          |          |      |          |          |          |          |          |  |    |    |  |  |  |      |          |  |  |  |  |      |          |          |  |  |  |
| 6 B                                                                                                                            | 0.000000                                                                                                                                                                                                                                                                                                                                                                                                                                                                                                                                                                                                                                                                                                                                                                                                                                                                                                                                                                                                                                                                                                                                                                                                                                                                                                                                                                                                                                                                                                                                                                                                                                                                                                                                                                                                                                                                                                                                                                                                                                                                                                                                                                                                                                                                                                                                                                                                |          |          |          |          |   |   |      |          |  |  |  |  |      |          |          |  |  |  |     |          |          |          |  |  |     |          |          |          |          |  |     |          |          |          |          |          |     |          |          |          |          |          |      |          |          |          |          |          |     |          |          |          |          |          |      |          |          |          |          |          |      |          |          |          |          |          |      |          |          |          |          |          |      |          |          |          |          |          |  |   |   |   |   |    |     |          |  |  |  |  |      |          |          |  |  |  |     |          |          |          |  |  |      |          |          |          |          |  |      |          |          |          |          |          |      |          |          |          |          |          |      |          |          |          |          |          |  |    |    |  |  |  |      |          |  |  |  |  |      |          |          |  |  |  |
| 7 B                                                                                                                            | 2.962722                                                                                                                                                                                                                                                                                                                                                                                                                                                                                                                                                                                                                                                                                                                                                                                                                                                                                                                                                                                                                                                                                                                                                                                                                                                                                                                                                                                                                                                                                                                                                                                                                                                                                                                                                                                                                                                                                                                                                                                                                                                                                                                                                                                                                                                                                                                                                                                                | 0.000000 |          |          |          |   |   |      |          |  |  |  |  |      |          |          |  |  |  |     |          |          |          |  |  |     |          |          |          |          |  |     |          |          |          |          |          |     |          |          |          |          |          |      |          |          |          |          |          |     |          |          |          |          |          |      |          |          |          |          |          |      |          |          |          |          |          |      |          |          |          |          |          |      |          |          |          |          |          |  |   |   |   |   |    |     |          |  |  |  |  |      |          |          |  |  |  |     |          |          |          |  |  |      |          |          |          |          |  |      |          |          |          |          |          |      |          |          |          |          |          |      |          |          |          |          |          |  |    |    |  |  |  |      |          |  |  |  |  |      |          |          |  |  |  |
| 8 B                                                                                                                            | 1.722699                                                                                                                                                                                                                                                                                                                                                                                                                                                                                                                                                                                                                                                                                                                                                                                                                                                                                                                                                                                                                                                                                                                                                                                                                                                                                                                                                                                                                                                                                                                                                                                                                                                                                                                                                                                                                                                                                                                                                                                                                                                                                                                                                                                                                                                                                                                                                                                                | 3.862514 | 0.000000 |          |          |   |   |      |          |  |  |  |  |      |          |          |  |  |  |     |          |          |          |  |  |     |          |          |          |          |  |     |          |          |          |          |          |     |          |          |          |          |          |      |          |          |          |          |          |     |          |          |          |          |          |      |          |          |          |          |          |      |          |          |          |          |          |      |          |          |          |          |          |      |          |          |          |          |          |  |   |   |   |   |    |     |          |  |  |  |  |      |          |          |  |  |  |     |          |          |          |  |  |      |          |          |          |          |  |      |          |          |          |          |          |      |          |          |          |          |          |      |          |          |          |          |          |  |    |    |  |  |  |      |          |  |  |  |  |      |          |          |  |  |  |
| 9 Os                                                                                                                           | 4.257665                                                                                                                                                                                                                                                                                                                                                                                                                                                                                                                                                                                                                                                                                                                                                                                                                                                                                                                                                                                                                                                                                                                                                                                                                                                                                                                                                                                                                                                                                                                                                                                                                                                                                                                                                                                                                                                                                                                                                                                                                                                                                                                                                                                                                                                                                                                                                                                                | 2.255913 | 4.247118 | 0.000000 |          |   |   |      |          |  |  |  |  |      |          |          |  |  |  |     |          |          |          |  |  |     |          |          |          |          |  |     |          |          |          |          |          |     |          |          |          |          |          |      |          |          |          |          |          |     |          |          |          |          |          |      |          |          |          |          |          |      |          |          |          |          |          |      |          |          |          |          |          |      |          |          |          |          |          |  |   |   |   |   |    |     |          |  |  |  |  |      |          |          |  |  |  |     |          |          |          |  |  |      |          |          |          |          |  |      |          |          |          |          |          |      |          |          |          |          |          |      |          |          |          |          |          |  |    |    |  |  |  |      |          |  |  |  |  |      |          |          |  |  |  |
| 10 B                                                                                                                           | 3.092697                                                                                                                                                                                                                                                                                                                                                                                                                                                                                                                                                                                                                                                                                                                                                                                                                                                                                                                                                                                                                                                                                                                                                                                                                                                                                                                                                                                                                                                                                                                                                                                                                                                                                                                                                                                                                                                                                                                                                                                                                                                                                                                                                                                                                                                                                                                                                                                                | 1.774426 | 3.538575 | 2.303007 | 0.000000 |   |   |      |          |  |  |  |  |      |          |          |  |  |  |     |          |          |          |  |  |     |          |          |          |          |  |     |          |          |          |          |          |     |          |          |          |          |          |      |          |          |          |          |          |     |          |          |          |          |          |      |          |          |          |          |          |      |          |          |          |          |          |      |          |          |          |          |          |      |          |          |          |          |          |  |   |   |   |   |    |     |          |  |  |  |  |      |          |          |  |  |  |     |          |          |          |  |  |      |          |          |          |          |  |      |          |          |          |          |          |      |          |          |          |          |          |      |          |          |          |          |          |  |    |    |  |  |  |      |          |  |  |  |  |      |          |          |  |  |  |
| 11 B                                                                                                                           | 2.003977                                                                                                                                                                                                                                                                                                                                                                                                                                                                                                                                                                                                                                                                                                                                                                                                                                                                                                                                                                                                                                                                                                                                                                                                                                                                                                                                                                                                                                                                                                                                                                                                                                                                                                                                                                                                                                                                                                                                                                                                                                                                                                                                                                                                                                                                                                                                                                                                | 2.925396 | 1.890831 | 3.393318 | 1.904336 |   |   |      |          |  |  |  |  |      |          |          |  |  |  |     |          |          |          |  |  |     |          |          |          |          |  |     |          |          |          |          |          |     |          |          |          |          |          |      |          |          |          |          |          |     |          |          |          |          |          |      |          |          |          |          |          |      |          |          |          |          |          |      |          |          |          |          |          |      |          |          |          |          |          |  |   |   |   |   |    |     |          |  |  |  |  |      |          |          |  |  |  |     |          |          |          |  |  |      |          |          |          |          |  |      |          |          |          |          |          |      |          |          |          |          |          |      |          |          |          |          |          |  |    |    |  |  |  |      |          |  |  |  |  |      |          |          |  |  |  |
| 12 B                                                                                                                           | 3.602713                                                                                                                                                                                                                                                                                                                                                                                                                                                                                                                                                                                                                                                                                                                                                                                                                                                                                                                                                                                                                                                                                                                                                                                                                                                                                                                                                                                                                                                                                                                                                                                                                                                                                                                                                                                                                                                                                                                                                                                                                                                                                                                                                                                                                                                                                                                                                                                                | 3.086959 | 3.114853 | 2.226990 | 1.812175 |   |   |      |          |  |  |  |  |      |          |          |  |  |  |     |          |          |          |  |  |     |          |          |          |          |  |     |          |          |          |          |          |     |          |          |          |          |          |      |          |          |          |          |          |     |          |          |          |          |          |      |          |          |          |          |          |      |          |          |          |          |          |      |          |          |          |          |          |      |          |          |          |          |          |  |   |   |   |   |    |     |          |  |  |  |  |      |          |          |  |  |  |     |          |          |          |  |  |      |          |          |          |          |  |      |          |          |          |          |          |      |          |          |          |          |          |      |          |          |          |          |          |  |    |    |  |  |  |      |          |  |  |  |  |      |          |          |  |  |  |
|                                                                                                                                | 11                                                                                                                                                                                                                                                                                                                                                                                                                                                                                                                                                                                                                                                                                                                                                                                                                                                                                                                                                                                                                                                                                                                                                                                                                                                                                                                                                                                                                                                                                                                                                                                                                                                                                                                                                                                                                                                                                                                                                                                                                                                                                                                                                                                                                                                                                                                                                                                                      | 12       |          |          |          |   |   |      |          |  |  |  |  |      |          |          |  |  |  |     |          |          |          |  |  |     |          |          |          |          |  |     |          |          |          |          |          |     |          |          |          |          |          |      |          |          |          |          |          |     |          |          |          |          |          |      |          |          |          |          |          |      |          |          |          |          |          |      |          |          |          |          |          |      |          |          |          |          |          |  |   |   |   |   |    |     |          |  |  |  |  |      |          |          |  |  |  |     |          |          |          |  |  |      |          |          |          |          |  |      |          |          |          |          |          |      |          |          |          |          |          |      |          |          |          |          |          |  |    |    |  |  |  |      |          |  |  |  |  |      |          |          |  |  |  |
| 11 B                                                                                                                           | 0.000000                                                                                                                                                                                                                                                                                                                                                                                                                                                                                                                                                                                                                                                                                                                                                                                                                                                                                                                                                                                                                                                                                                                                                                                                                                                                                                                                                                                                                                                                                                                                                                                                                                                                                                                                                                                                                                                                                                                                                                                                                                                                                                                                                                                                                                                                                                                                                                                                |          |          |          |          |   |   |      |          |  |  |  |  |      |          |          |  |  |  |     |          |          |          |  |  |     |          |          |          |          |  |     |          |          |          |          |          |     |          |          |          |          |          |      |          |          |          |          |          |     |          |          |          |          |          |      |          |          |          |          |          |      |          |          |          |          |          |      |          |          |          |          |          |      |          |          |          |          |          |  |   |   |   |   |    |     |          |  |  |  |  |      |          |          |  |  |  |     |          |          |          |  |  |      |          |          |          |          |  |      |          |          |          |          |          |      |          |          |          |          |          |      |          |          |          |          |          |  |    |    |  |  |  |      |          |  |  |  |  |      |          |          |  |  |  |
| 12 B                                                                                                                           | 1.879480                                                                                                                                                                                                                                                                                                                                                                                                                                                                                                                                                                                                                                                                                                                                                                                                                                                                                                                                                                                                                                                                                                                                                                                                                                                                                                                                                                                                                                                                                                                                                                                                                                                                                                                                                                                                                                                                                                                                                                                                                                                                                                                                                                                                                                                                                                                                                                                                | 0.000000 |          |          |          |   |   |      |          |  |  |  |  |      |          |          |  |  |  |     |          |          |          |  |  |     |          |          |          |          |  |     |          |          |          |          |          |     |          |          |          |          |          |      |          |          |          |          |          |     |          |          |          |          |          |      |          |          |          |          |          |      |          |          |          |          |          |      |          |          |          |          |          |      |          |          |          |          |          |  |   |   |   |   |    |     |          |  |  |  |  |      |          |          |  |  |  |     |          |          |          |  |  |      |          |          |          |          |  |      |          |          |          |          |          |      |          |          |          |          |          |      |          |          |          |          |          |  |    |    |  |  |  |      |          |  |  |  |  |      |          |          |  |  |  |

| 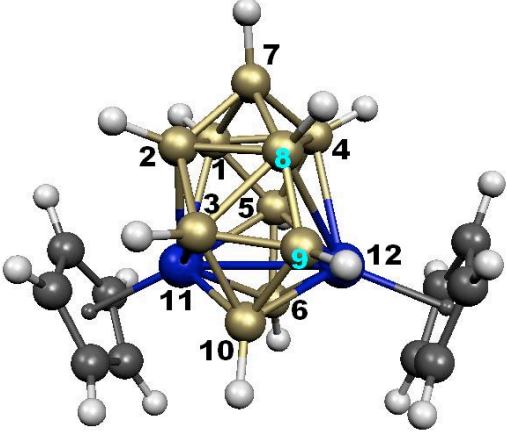 <p>7. -823.21042409 +27.7</p>                | <table border="1"> <thead> <tr> <th></th> <th>1</th> <th>2</th> <th>3</th> <th>4</th> <th>5</th> </tr> </thead> <tbody> <tr><td>1 B</td><td>0.000000</td><td></td><td></td><td></td><td></td></tr> <tr><td>2 B</td><td>1.796051</td><td>0.000000</td><td></td><td></td><td></td></tr> <tr><td>3 B</td><td>3.251007</td><td>1.845615</td><td>0.000000</td><td></td><td></td></tr> <tr><td>4 B</td><td>1.844519</td><td>2.695083</td><td>3.561991</td><td>0.000000</td><td></td></tr> <tr><td>5 B</td><td>1.740689</td><td>2.984686</td><td>3.639128</td><td>1.718582</td><td>0.000000</td></tr> <tr><td>6 B</td><td>3.169583</td><td>3.894383</td><td>3.812276</td><td>3.217005</td><td>1.727700</td></tr> <tr><td>7 B</td><td>1.735857</td><td>1.680275</td><td>3.060441</td><td>1.676472</td><td>2.851366</td></tr> <tr><td>8 B</td><td>2.724588</td><td>1.872724</td><td>1.938059</td><td>2.170444</td><td>3.121429</td></tr> <tr><td>9 B</td><td>3.900654</td><td>2.954048</td><td>1.687068</td><td>3.348398</td><td>3.732311</td></tr> <tr><td>10 B</td><td>3.861146</td><td>3.158329</td><td>1.755932</td><td>3.860386</td><td>3.416516</td></tr> <tr><td>11 Os</td><td>2.370262</td><td>2.326776</td><td>2.331079</td><td>3.292126</td><td>2.275595</td></tr> <tr><td>12 Os</td><td>3.329993</td><td>3.501410</td><td>3.054005</td><td>2.419741</td><td>2.214576</td></tr> <tr> <th></th> <th>6</th> <th>7</th> <th>8</th> <th>9</th> <th>10</th> </tr> <tr><td>6 B</td><td>0.000000</td><td></td><td></td><td></td><td></td></tr> <tr><td>7 B</td><td>4.274824</td><td>0.000000</td><td></td><td></td><td></td></tr> <tr><td>8 B</td><td>3.964205</td><td>1.721204</td><td>0.000000</td><td></td><td></td></tr> <tr><td>9 B</td><td>3.812861</td><td>3.379410</td><td>1.712759</td><td>0.000000</td><td></td></tr> <tr><td>10 B</td><td>2.823516</td><td>4.101410</td><td>2.858295</td><td>1.744529</td><td>0.000000</td></tr> <tr><td>11 Os</td><td>2.102997</td><td>3.442539</td><td>3.178408</td><td>3.237140</td><td>2.175394</td></tr> <tr><td>12 Os</td><td>2.107871</td><td>3.494043</td><td>2.575130</td><td>2.213963</td><td>2.220628</td></tr> <tr> <th></th> <th>11</th> <th>12</th> </tr> <tr><td>11 Os</td><td>0.000000</td><td></td></tr> <tr><td>12 Os</td><td>2.837575</td><td>0.000000</td></tr> </tbody> </table> |          | 1        | 2        | 3        | 4 | 5 | 1 B | 0.000000 |  |  |  |  | 2 B | 1.796051 | 0.000000 |  |  |  | 3 B | 3.251007 | 1.845615 | 0.000000 |  |  | 4 B | 1.844519 | 2.695083 | 3.561991 | 0.000000 |  | 5 B | 1.740689 | 2.984686 | 3.639128 | 1.718582 | 0.000000 | 6 B | 3.169583 | 3.894383 | 3.812276 | 3.217005 | 1.727700 | 7 B | 1.735857 | 1.680275 | 3.060441 | 1.676472 | 2.851366 | 8 B  | 2.724588 | 1.872724 | 1.938059 | 2.170444 | 3.121429 | 9 B  | 3.900654 | 2.954048 | 1.687068 | 3.348398 | 3.732311 | 10 B | 3.861146 | 3.158329 | 1.755932 | 3.860386 | 3.416516 | 11 Os | 2.370262 | 2.326776 | 2.331079 | 3.292126 | 2.275595 | 12 Os | 3.329993 | 3.501410 | 3.054005 | 2.419741 | 2.214576 |  | 6 | 7 | 8 | 9 | 10 | 6 B | 0.000000 |  |  |  |  | 7 B | 4.274824 | 0.000000 |  |  |  | 8 B  | 3.964205 | 1.721204 | 0.000000 |  |  | 9 B  | 3.812861 | 3.379410 | 1.712759 | 0.000000 |  | 10 B | 2.823516 | 4.101410 | 2.858295 | 1.744529 | 0.000000 | 11 Os | 2.102997 | 3.442539 | 3.178408 | 3.237140 | 2.175394 | 12 Os | 2.107871 | 3.494043 | 2.575130 | 2.213963 | 2.220628 |  | 11 | 12 | 11 Os | 0.000000 |  | 12 Os | 2.837575 | 0.000000 |
|--------------------------------------------------------------------------------------------------------------------------------|--------------------------------------------------------------------------------------------------------------------------------------------------------------------------------------------------------------------------------------------------------------------------------------------------------------------------------------------------------------------------------------------------------------------------------------------------------------------------------------------------------------------------------------------------------------------------------------------------------------------------------------------------------------------------------------------------------------------------------------------------------------------------------------------------------------------------------------------------------------------------------------------------------------------------------------------------------------------------------------------------------------------------------------------------------------------------------------------------------------------------------------------------------------------------------------------------------------------------------------------------------------------------------------------------------------------------------------------------------------------------------------------------------------------------------------------------------------------------------------------------------------------------------------------------------------------------------------------------------------------------------------------------------------------------------------------------------------------------------------------------------------------------------------------------------------------------------------------------------------------------------------------------------------------------------------------------------------------------------------------------------------------------------------------------------------------------------------------------------------------------------------------------------------------------------------------------------------------------------------------------------------------------------------------------------------------------------------------|----------|----------|----------|----------|---|---|-----|----------|--|--|--|--|-----|----------|----------|--|--|--|-----|----------|----------|----------|--|--|-----|----------|----------|----------|----------|--|-----|----------|----------|----------|----------|----------|-----|----------|----------|----------|----------|----------|-----|----------|----------|----------|----------|----------|------|----------|----------|----------|----------|----------|------|----------|----------|----------|----------|----------|------|----------|----------|----------|----------|----------|-------|----------|----------|----------|----------|----------|-------|----------|----------|----------|----------|----------|--|---|---|---|---|----|-----|----------|--|--|--|--|-----|----------|----------|--|--|--|------|----------|----------|----------|--|--|------|----------|----------|----------|----------|--|------|----------|----------|----------|----------|----------|-------|----------|----------|----------|----------|----------|-------|----------|----------|----------|----------|----------|--|----|----|-------|----------|--|-------|----------|----------|
|                                                                                                                                | 1                                                                                                                                                                                                                                                                                                                                                                                                                                                                                                                                                                                                                                                                                                                                                                                                                                                                                                                                                                                                                                                                                                                                                                                                                                                                                                                                                                                                                                                                                                                                                                                                                                                                                                                                                                                                                                                                                                                                                                                                                                                                                                                                                                                                                                                                                                                                          | 2        | 3        | 4        | 5        |   |   |     |          |  |  |  |  |     |          |          |  |  |  |     |          |          |          |  |  |     |          |          |          |          |  |     |          |          |          |          |          |     |          |          |          |          |          |     |          |          |          |          |          |      |          |          |          |          |          |      |          |          |          |          |          |      |          |          |          |          |          |       |          |          |          |          |          |       |          |          |          |          |          |  |   |   |   |   |    |     |          |  |  |  |  |     |          |          |  |  |  |      |          |          |          |  |  |      |          |          |          |          |  |      |          |          |          |          |          |       |          |          |          |          |          |       |          |          |          |          |          |  |    |    |       |          |  |       |          |          |
| 1 B                                                                                                                            | 0.000000                                                                                                                                                                                                                                                                                                                                                                                                                                                                                                                                                                                                                                                                                                                                                                                                                                                                                                                                                                                                                                                                                                                                                                                                                                                                                                                                                                                                                                                                                                                                                                                                                                                                                                                                                                                                                                                                                                                                                                                                                                                                                                                                                                                                                                                                                                                                   |          |          |          |          |   |   |     |          |  |  |  |  |     |          |          |  |  |  |     |          |          |          |  |  |     |          |          |          |          |  |     |          |          |          |          |          |     |          |          |          |          |          |     |          |          |          |          |          |      |          |          |          |          |          |      |          |          |          |          |          |      |          |          |          |          |          |       |          |          |          |          |          |       |          |          |          |          |          |  |   |   |   |   |    |     |          |  |  |  |  |     |          |          |  |  |  |      |          |          |          |  |  |      |          |          |          |          |  |      |          |          |          |          |          |       |          |          |          |          |          |       |          |          |          |          |          |  |    |    |       |          |  |       |          |          |
| 2 B                                                                                                                            | 1.796051                                                                                                                                                                                                                                                                                                                                                                                                                                                                                                                                                                                                                                                                                                                                                                                                                                                                                                                                                                                                                                                                                                                                                                                                                                                                                                                                                                                                                                                                                                                                                                                                                                                                                                                                                                                                                                                                                                                                                                                                                                                                                                                                                                                                                                                                                                                                   | 0.000000 |          |          |          |   |   |     |          |  |  |  |  |     |          |          |  |  |  |     |          |          |          |  |  |     |          |          |          |          |  |     |          |          |          |          |          |     |          |          |          |          |          |     |          |          |          |          |          |      |          |          |          |          |          |      |          |          |          |          |          |      |          |          |          |          |          |       |          |          |          |          |          |       |          |          |          |          |          |  |   |   |   |   |    |     |          |  |  |  |  |     |          |          |  |  |  |      |          |          |          |  |  |      |          |          |          |          |  |      |          |          |          |          |          |       |          |          |          |          |          |       |          |          |          |          |          |  |    |    |       |          |  |       |          |          |
| 3 B                                                                                                                            | 3.251007                                                                                                                                                                                                                                                                                                                                                                                                                                                                                                                                                                                                                                                                                                                                                                                                                                                                                                                                                                                                                                                                                                                                                                                                                                                                                                                                                                                                                                                                                                                                                                                                                                                                                                                                                                                                                                                                                                                                                                                                                                                                                                                                                                                                                                                                                                                                   | 1.845615 | 0.000000 |          |          |   |   |     |          |  |  |  |  |     |          |          |  |  |  |     |          |          |          |  |  |     |          |          |          |          |  |     |          |          |          |          |          |     |          |          |          |          |          |     |          |          |          |          |          |      |          |          |          |          |          |      |          |          |          |          |          |      |          |          |          |          |          |       |          |          |          |          |          |       |          |          |          |          |          |  |   |   |   |   |    |     |          |  |  |  |  |     |          |          |  |  |  |      |          |          |          |  |  |      |          |          |          |          |  |      |          |          |          |          |          |       |          |          |          |          |          |       |          |          |          |          |          |  |    |    |       |          |  |       |          |          |
| 4 B                                                                                                                            | 1.844519                                                                                                                                                                                                                                                                                                                                                                                                                                                                                                                                                                                                                                                                                                                                                                                                                                                                                                                                                                                                                                                                                                                                                                                                                                                                                                                                                                                                                                                                                                                                                                                                                                                                                                                                                                                                                                                                                                                                                                                                                                                                                                                                                                                                                                                                                                                                   | 2.695083 | 3.561991 | 0.000000 |          |   |   |     |          |  |  |  |  |     |          |          |  |  |  |     |          |          |          |  |  |     |          |          |          |          |  |     |          |          |          |          |          |     |          |          |          |          |          |     |          |          |          |          |          |      |          |          |          |          |          |      |          |          |          |          |          |      |          |          |          |          |          |       |          |          |          |          |          |       |          |          |          |          |          |  |   |   |   |   |    |     |          |  |  |  |  |     |          |          |  |  |  |      |          |          |          |  |  |      |          |          |          |          |  |      |          |          |          |          |          |       |          |          |          |          |          |       |          |          |          |          |          |  |    |    |       |          |  |       |          |          |
| 5 B                                                                                                                            | 1.740689                                                                                                                                                                                                                                                                                                                                                                                                                                                                                                                                                                                                                                                                                                                                                                                                                                                                                                                                                                                                                                                                                                                                                                                                                                                                                                                                                                                                                                                                                                                                                                                                                                                                                                                                                                                                                                                                                                                                                                                                                                                                                                                                                                                                                                                                                                                                   | 2.984686 | 3.639128 | 1.718582 | 0.000000 |   |   |     |          |  |  |  |  |     |          |          |  |  |  |     |          |          |          |  |  |     |          |          |          |          |  |     |          |          |          |          |          |     |          |          |          |          |          |     |          |          |          |          |          |      |          |          |          |          |          |      |          |          |          |          |          |      |          |          |          |          |          |       |          |          |          |          |          |       |          |          |          |          |          |  |   |   |   |   |    |     |          |  |  |  |  |     |          |          |  |  |  |      |          |          |          |  |  |      |          |          |          |          |  |      |          |          |          |          |          |       |          |          |          |          |          |       |          |          |          |          |          |  |    |    |       |          |  |       |          |          |
| 6 B                                                                                                                            | 3.169583                                                                                                                                                                                                                                                                                                                                                                                                                                                                                                                                                                                                                                                                                                                                                                                                                                                                                                                                                                                                                                                                                                                                                                                                                                                                                                                                                                                                                                                                                                                                                                                                                                                                                                                                                                                                                                                                                                                                                                                                                                                                                                                                                                                                                                                                                                                                   | 3.894383 | 3.812276 | 3.217005 | 1.727700 |   |   |     |          |  |  |  |  |     |          |          |  |  |  |     |          |          |          |  |  |     |          |          |          |          |  |     |          |          |          |          |          |     |          |          |          |          |          |     |          |          |          |          |          |      |          |          |          |          |          |      |          |          |          |          |          |      |          |          |          |          |          |       |          |          |          |          |          |       |          |          |          |          |          |  |   |   |   |   |    |     |          |  |  |  |  |     |          |          |  |  |  |      |          |          |          |  |  |      |          |          |          |          |  |      |          |          |          |          |          |       |          |          |          |          |          |       |          |          |          |          |          |  |    |    |       |          |  |       |          |          |
| 7 B                                                                                                                            | 1.735857                                                                                                                                                                                                                                                                                                                                                                                                                                                                                                                                                                                                                                                                                                                                                                                                                                                                                                                                                                                                                                                                                                                                                                                                                                                                                                                                                                                                                                                                                                                                                                                                                                                                                                                                                                                                                                                                                                                                                                                                                                                                                                                                                                                                                                                                                                                                   | 1.680275 | 3.060441 | 1.676472 | 2.851366 |   |   |     |          |  |  |  |  |     |          |          |  |  |  |     |          |          |          |  |  |     |          |          |          |          |  |     |          |          |          |          |          |     |          |          |          |          |          |     |          |          |          |          |          |      |          |          |          |          |          |      |          |          |          |          |          |      |          |          |          |          |          |       |          |          |          |          |          |       |          |          |          |          |          |  |   |   |   |   |    |     |          |  |  |  |  |     |          |          |  |  |  |      |          |          |          |  |  |      |          |          |          |          |  |      |          |          |          |          |          |       |          |          |          |          |          |       |          |          |          |          |          |  |    |    |       |          |  |       |          |          |
| 8 B                                                                                                                            | 2.724588                                                                                                                                                                                                                                                                                                                                                                                                                                                                                                                                                                                                                                                                                                                                                                                                                                                                                                                                                                                                                                                                                                                                                                                                                                                                                                                                                                                                                                                                                                                                                                                                                                                                                                                                                                                                                                                                                                                                                                                                                                                                                                                                                                                                                                                                                                                                   | 1.872724 | 1.938059 | 2.170444 | 3.121429 |   |   |     |          |  |  |  |  |     |          |          |  |  |  |     |          |          |          |  |  |     |          |          |          |          |  |     |          |          |          |          |          |     |          |          |          |          |          |     |          |          |          |          |          |      |          |          |          |          |          |      |          |          |          |          |          |      |          |          |          |          |          |       |          |          |          |          |          |       |          |          |          |          |          |  |   |   |   |   |    |     |          |  |  |  |  |     |          |          |  |  |  |      |          |          |          |  |  |      |          |          |          |          |  |      |          |          |          |          |          |       |          |          |          |          |          |       |          |          |          |          |          |  |    |    |       |          |  |       |          |          |
| 9 B                                                                                                                            | 3.900654                                                                                                                                                                                                                                                                                                                                                                                                                                                                                                                                                                                                                                                                                                                                                                                                                                                                                                                                                                                                                                                                                                                                                                                                                                                                                                                                                                                                                                                                                                                                                                                                                                                                                                                                                                                                                                                                                                                                                                                                                                                                                                                                                                                                                                                                                                                                   | 2.954048 | 1.687068 | 3.348398 | 3.732311 |   |   |     |          |  |  |  |  |     |          |          |  |  |  |     |          |          |          |  |  |     |          |          |          |          |  |     |          |          |          |          |          |     |          |          |          |          |          |     |          |          |          |          |          |      |          |          |          |          |          |      |          |          |          |          |          |      |          |          |          |          |          |       |          |          |          |          |          |       |          |          |          |          |          |  |   |   |   |   |    |     |          |  |  |  |  |     |          |          |  |  |  |      |          |          |          |  |  |      |          |          |          |          |  |      |          |          |          |          |          |       |          |          |          |          |          |       |          |          |          |          |          |  |    |    |       |          |  |       |          |          |
| 10 B                                                                                                                           | 3.861146                                                                                                                                                                                                                                                                                                                                                                                                                                                                                                                                                                                                                                                                                                                                                                                                                                                                                                                                                                                                                                                                                                                                                                                                                                                                                                                                                                                                                                                                                                                                                                                                                                                                                                                                                                                                                                                                                                                                                                                                                                                                                                                                                                                                                                                                                                                                   | 3.158329 | 1.755932 | 3.860386 | 3.416516 |   |   |     |          |  |  |  |  |     |          |          |  |  |  |     |          |          |          |  |  |     |          |          |          |          |  |     |          |          |          |          |          |     |          |          |          |          |          |     |          |          |          |          |          |      |          |          |          |          |          |      |          |          |          |          |          |      |          |          |          |          |          |       |          |          |          |          |          |       |          |          |          |          |          |  |   |   |   |   |    |     |          |  |  |  |  |     |          |          |  |  |  |      |          |          |          |  |  |      |          |          |          |          |  |      |          |          |          |          |          |       |          |          |          |          |          |       |          |          |          |          |          |  |    |    |       |          |  |       |          |          |
| 11 Os                                                                                                                          | 2.370262                                                                                                                                                                                                                                                                                                                                                                                                                                                                                                                                                                                                                                                                                                                                                                                                                                                                                                                                                                                                                                                                                                                                                                                                                                                                                                                                                                                                                                                                                                                                                                                                                                                                                                                                                                                                                                                                                                                                                                                                                                                                                                                                                                                                                                                                                                                                   | 2.326776 | 2.331079 | 3.292126 | 2.275595 |   |   |     |          |  |  |  |  |     |          |          |  |  |  |     |          |          |          |  |  |     |          |          |          |          |  |     |          |          |          |          |          |     |          |          |          |          |          |     |          |          |          |          |          |      |          |          |          |          |          |      |          |          |          |          |          |      |          |          |          |          |          |       |          |          |          |          |          |       |          |          |          |          |          |  |   |   |   |   |    |     |          |  |  |  |  |     |          |          |  |  |  |      |          |          |          |  |  |      |          |          |          |          |  |      |          |          |          |          |          |       |          |          |          |          |          |       |          |          |          |          |          |  |    |    |       |          |  |       |          |          |
| 12 Os                                                                                                                          | 3.329993                                                                                                                                                                                                                                                                                                                                                                                                                                                                                                                                                                                                                                                                                                                                                                                                                                                                                                                                                                                                                                                                                                                                                                                                                                                                                                                                                                                                                                                                                                                                                                                                                                                                                                                                                                                                                                                                                                                                                                                                                                                                                                                                                                                                                                                                                                                                   | 3.501410 | 3.054005 | 2.419741 | 2.214576 |   |   |     |          |  |  |  |  |     |          |          |  |  |  |     |          |          |          |  |  |     |          |          |          |          |  |     |          |          |          |          |          |     |          |          |          |          |          |     |          |          |          |          |          |      |          |          |          |          |          |      |          |          |          |          |          |      |          |          |          |          |          |       |          |          |          |          |          |       |          |          |          |          |          |  |   |   |   |   |    |     |          |  |  |  |  |     |          |          |  |  |  |      |          |          |          |  |  |      |          |          |          |          |  |      |          |          |          |          |          |       |          |          |          |          |          |       |          |          |          |          |          |  |    |    |       |          |  |       |          |          |
|                                                                                                                                | 6                                                                                                                                                                                                                                                                                                                                                                                                                                                                                                                                                                                                                                                                                                                                                                                                                                                                                                                                                                                                                                                                                                                                                                                                                                                                                                                                                                                                                                                                                                                                                                                                                                                                                                                                                                                                                                                                                                                                                                                                                                                                                                                                                                                                                                                                                                                                          | 7        | 8        | 9        | 10       |   |   |     |          |  |  |  |  |     |          |          |  |  |  |     |          |          |          |  |  |     |          |          |          |          |  |     |          |          |          |          |          |     |          |          |          |          |          |     |          |          |          |          |          |      |          |          |          |          |          |      |          |          |          |          |          |      |          |          |          |          |          |       |          |          |          |          |          |       |          |          |          |          |          |  |   |   |   |   |    |     |          |  |  |  |  |     |          |          |  |  |  |      |          |          |          |  |  |      |          |          |          |          |  |      |          |          |          |          |          |       |          |          |          |          |          |       |          |          |          |          |          |  |    |    |       |          |  |       |          |          |
| 6 B                                                                                                                            | 0.000000                                                                                                                                                                                                                                                                                                                                                                                                                                                                                                                                                                                                                                                                                                                                                                                                                                                                                                                                                                                                                                                                                                                                                                                                                                                                                                                                                                                                                                                                                                                                                                                                                                                                                                                                                                                                                                                                                                                                                                                                                                                                                                                                                                                                                                                                                                                                   |          |          |          |          |   |   |     |          |  |  |  |  |     |          |          |  |  |  |     |          |          |          |  |  |     |          |          |          |          |  |     |          |          |          |          |          |     |          |          |          |          |          |     |          |          |          |          |          |      |          |          |          |          |          |      |          |          |          |          |          |      |          |          |          |          |          |       |          |          |          |          |          |       |          |          |          |          |          |  |   |   |   |   |    |     |          |  |  |  |  |     |          |          |  |  |  |      |          |          |          |  |  |      |          |          |          |          |  |      |          |          |          |          |          |       |          |          |          |          |          |       |          |          |          |          |          |  |    |    |       |          |  |       |          |          |
| 7 B                                                                                                                            | 4.274824                                                                                                                                                                                                                                                                                                                                                                                                                                                                                                                                                                                                                                                                                                                                                                                                                                                                                                                                                                                                                                                                                                                                                                                                                                                                                                                                                                                                                                                                                                                                                                                                                                                                                                                                                                                                                                                                                                                                                                                                                                                                                                                                                                                                                                                                                                                                   | 0.000000 |          |          |          |   |   |     |          |  |  |  |  |     |          |          |  |  |  |     |          |          |          |  |  |     |          |          |          |          |  |     |          |          |          |          |          |     |          |          |          |          |          |     |          |          |          |          |          |      |          |          |          |          |          |      |          |          |          |          |          |      |          |          |          |          |          |       |          |          |          |          |          |       |          |          |          |          |          |  |   |   |   |   |    |     |          |  |  |  |  |     |          |          |  |  |  |      |          |          |          |  |  |      |          |          |          |          |  |      |          |          |          |          |          |       |          |          |          |          |          |       |          |          |          |          |          |  |    |    |       |          |  |       |          |          |
| 8 B                                                                                                                            | 3.964205                                                                                                                                                                                                                                                                                                                                                                                                                                                                                                                                                                                                                                                                                                                                                                                                                                                                                                                                                                                                                                                                                                                                                                                                                                                                                                                                                                                                                                                                                                                                                                                                                                                                                                                                                                                                                                                                                                                                                                                                                                                                                                                                                                                                                                                                                                                                   | 1.721204 | 0.000000 |          |          |   |   |     |          |  |  |  |  |     |          |          |  |  |  |     |          |          |          |  |  |     |          |          |          |          |  |     |          |          |          |          |          |     |          |          |          |          |          |     |          |          |          |          |          |      |          |          |          |          |          |      |          |          |          |          |          |      |          |          |          |          |          |       |          |          |          |          |          |       |          |          |          |          |          |  |   |   |   |   |    |     |          |  |  |  |  |     |          |          |  |  |  |      |          |          |          |  |  |      |          |          |          |          |  |      |          |          |          |          |          |       |          |          |          |          |          |       |          |          |          |          |          |  |    |    |       |          |  |       |          |          |
| 9 B                                                                                                                            | 3.812861                                                                                                                                                                                                                                                                                                                                                                                                                                                                                                                                                                                                                                                                                                                                                                                                                                                                                                                                                                                                                                                                                                                                                                                                                                                                                                                                                                                                                                                                                                                                                                                                                                                                                                                                                                                                                                                                                                                                                                                                                                                                                                                                                                                                                                                                                                                                   | 3.379410 | 1.712759 | 0.000000 |          |   |   |     |          |  |  |  |  |     |          |          |  |  |  |     |          |          |          |  |  |     |          |          |          |          |  |     |          |          |          |          |          |     |          |          |          |          |          |     |          |          |          |          |          |      |          |          |          |          |          |      |          |          |          |          |          |      |          |          |          |          |          |       |          |          |          |          |          |       |          |          |          |          |          |  |   |   |   |   |    |     |          |  |  |  |  |     |          |          |  |  |  |      |          |          |          |  |  |      |          |          |          |          |  |      |          |          |          |          |          |       |          |          |          |          |          |       |          |          |          |          |          |  |    |    |       |          |  |       |          |          |
| 10 B                                                                                                                           | 2.823516                                                                                                                                                                                                                                                                                                                                                                                                                                                                                                                                                                                                                                                                                                                                                                                                                                                                                                                                                                                                                                                                                                                                                                                                                                                                                                                                                                                                                                                                                                                                                                                                                                                                                                                                                                                                                                                                                                                                                                                                                                                                                                                                                                                                                                                                                                                                   | 4.101410 | 2.858295 | 1.744529 | 0.000000 |   |   |     |          |  |  |  |  |     |          |          |  |  |  |     |          |          |          |  |  |     |          |          |          |          |  |     |          |          |          |          |          |     |          |          |          |          |          |     |          |          |          |          |          |      |          |          |          |          |          |      |          |          |          |          |          |      |          |          |          |          |          |       |          |          |          |          |          |       |          |          |          |          |          |  |   |   |   |   |    |     |          |  |  |  |  |     |          |          |  |  |  |      |          |          |          |  |  |      |          |          |          |          |  |      |          |          |          |          |          |       |          |          |          |          |          |       |          |          |          |          |          |  |    |    |       |          |  |       |          |          |
| 11 Os                                                                                                                          | 2.102997                                                                                                                                                                                                                                                                                                                                                                                                                                                                                                                                                                                                                                                                                                                                                                                                                                                                                                                                                                                                                                                                                                                                                                                                                                                                                                                                                                                                                                                                                                                                                                                                                                                                                                                                                                                                                                                                                                                                                                                                                                                                                                                                                                                                                                                                                                                                   | 3.442539 | 3.178408 | 3.237140 | 2.175394 |   |   |     |          |  |  |  |  |     |          |          |  |  |  |     |          |          |          |  |  |     |          |          |          |          |  |     |          |          |          |          |          |     |          |          |          |          |          |     |          |          |          |          |          |      |          |          |          |          |          |      |          |          |          |          |          |      |          |          |          |          |          |       |          |          |          |          |          |       |          |          |          |          |          |  |   |   |   |   |    |     |          |  |  |  |  |     |          |          |  |  |  |      |          |          |          |  |  |      |          |          |          |          |  |      |          |          |          |          |          |       |          |          |          |          |          |       |          |          |          |          |          |  |    |    |       |          |  |       |          |          |
| 12 Os                                                                                                                          | 2.107871                                                                                                                                                                                                                                                                                                                                                                                                                                                                                                                                                                                                                                                                                                                                                                                                                                                                                                                                                                                                                                                                                                                                                                                                                                                                                                                                                                                                                                                                                                                                                                                                                                                                                                                                                                                                                                                                                                                                                                                                                                                                                                                                                                                                                                                                                                                                   | 3.494043 | 2.575130 | 2.213963 | 2.220628 |   |   |     |          |  |  |  |  |     |          |          |  |  |  |     |          |          |          |  |  |     |          |          |          |          |  |     |          |          |          |          |          |     |          |          |          |          |          |     |          |          |          |          |          |      |          |          |          |          |          |      |          |          |          |          |          |      |          |          |          |          |          |       |          |          |          |          |          |       |          |          |          |          |          |  |   |   |   |   |    |     |          |  |  |  |  |     |          |          |  |  |  |      |          |          |          |  |  |      |          |          |          |          |  |      |          |          |          |          |          |       |          |          |          |          |          |       |          |          |          |          |          |  |    |    |       |          |  |       |          |          |
|                                                                                                                                | 11                                                                                                                                                                                                                                                                                                                                                                                                                                                                                                                                                                                                                                                                                                                                                                                                                                                                                                                                                                                                                                                                                                                                                                                                                                                                                                                                                                                                                                                                                                                                                                                                                                                                                                                                                                                                                                                                                                                                                                                                                                                                                                                                                                                                                                                                                                                                         | 12       |          |          |          |   |   |     |          |  |  |  |  |     |          |          |  |  |  |     |          |          |          |  |  |     |          |          |          |          |  |     |          |          |          |          |          |     |          |          |          |          |          |     |          |          |          |          |          |      |          |          |          |          |          |      |          |          |          |          |          |      |          |          |          |          |          |       |          |          |          |          |          |       |          |          |          |          |          |  |   |   |   |   |    |     |          |  |  |  |  |     |          |          |  |  |  |      |          |          |          |  |  |      |          |          |          |          |  |      |          |          |          |          |          |       |          |          |          |          |          |       |          |          |          |          |          |  |    |    |       |          |  |       |          |          |
| 11 Os                                                                                                                          | 0.000000                                                                                                                                                                                                                                                                                                                                                                                                                                                                                                                                                                                                                                                                                                                                                                                                                                                                                                                                                                                                                                                                                                                                                                                                                                                                                                                                                                                                                                                                                                                                                                                                                                                                                                                                                                                                                                                                                                                                                                                                                                                                                                                                                                                                                                                                                                                                   |          |          |          |          |   |   |     |          |  |  |  |  |     |          |          |  |  |  |     |          |          |          |  |  |     |          |          |          |          |  |     |          |          |          |          |          |     |          |          |          |          |          |     |          |          |          |          |          |      |          |          |          |          |          |      |          |          |          |          |          |      |          |          |          |          |          |       |          |          |          |          |          |       |          |          |          |          |          |  |   |   |   |   |    |     |          |  |  |  |  |     |          |          |  |  |  |      |          |          |          |  |  |      |          |          |          |          |  |      |          |          |          |          |          |       |          |          |          |          |          |       |          |          |          |          |          |  |    |    |       |          |  |       |          |          |
| 12 Os                                                                                                                          | 2.837575                                                                                                                                                                                                                                                                                                                                                                                                                                                                                                                                                                                                                                                                                                                                                                                                                                                                                                                                                                                                                                                                                                                                                                                                                                                                                                                                                                                                                                                                                                                                                                                                                                                                                                                                                                                                                                                                                                                                                                                                                                                                                                                                                                                                                                                                                                                                   | 0.000000 |          |          |          |   |   |     |          |  |  |  |  |     |          |          |  |  |  |     |          |          |          |  |  |     |          |          |          |          |  |     |          |          |          |          |          |     |          |          |          |          |          |     |          |          |          |          |          |      |          |          |          |          |          |      |          |          |          |          |          |      |          |          |          |          |          |       |          |          |          |          |          |       |          |          |          |          |          |  |   |   |   |   |    |     |          |  |  |  |  |     |          |          |  |  |  |      |          |          |          |  |  |      |          |          |          |          |  |      |          |          |          |          |          |       |          |          |          |          |          |       |          |          |          |          |          |  |    |    |       |          |  |       |          |          |
|  <p>8. -823.20602605 +30.5 C<sub>s</sub></p> | <table border="1"> <thead> <tr> <th></th> <th>1</th> <th>2</th> <th>3</th> <th>4</th> <th>5</th> </tr> </thead> <tbody> <tr><td>1 B</td><td>0.000000</td><td></td><td></td><td></td><td></td></tr> <tr><td>2 B</td><td>1.849569</td><td>0.000000</td><td></td><td></td><td></td></tr> <tr><td>3 B</td><td>1.777118</td><td>1.756163</td><td>0.000000</td><td></td><td></td></tr> <tr><td>4 B</td><td>1.829554</td><td>1.790826</td><td>2.970758</td><td>0.000000</td><td></td></tr> <tr><td>5 B</td><td>2.925366</td><td>1.734891</td><td>3.018056</td><td>1.802726</td><td>0.000000</td></tr> <tr><td>6 B</td><td>2.830319</td><td>1.876060</td><td>1.909112</td><td>2.883125</td><td>1.835774</td></tr> <tr><td>7 B</td><td>3.089529</td><td>2.968939</td><td>3.806778</td><td>1.849454</td><td>1.803410</td></tr> <tr><td>8 Os</td><td>2.341797</td><td>3.148357</td><td>2.044401</td><td>3.394145</td><td>3.553008</td></tr> <tr><td>9 Os</td><td>2.183059</td><td>3.372447</td><td>3.502187</td><td>2.164214</td><td>3.308154</td></tr> <tr><td>10 B</td><td>3.682001</td><td>3.030599</td><td>3.515632</td><td>2.966010</td><td>1.735562</td></tr> <tr><td>11 B</td><td>3.658823</td><td>3.512771</td><td>3.057104</td><td>3.803853</td><td>3.016979</td></tr> <tr><td>12 B</td><td>3.348066</td><td>3.683099</td><td>3.663940</td><td>3.084494</td><td>2.923643</td></tr> <tr> <th></th> <th>6</th> <th>7</th> <th>8</th> <th>9</th> <th>10</th> </tr> <tr><td>6 B</td><td>0.000000</td><td></td><td></td><td></td><td></td></tr> <tr><td>7 B</td><td>2.884118</td><td>0.000000</td><td></td><td></td><td></td></tr> <tr><td>8 Os</td><td>2.468895</td><td>3.395405</td><td>0.000000</td><td></td><td></td></tr> <tr><td>9 Os</td><td>3.654693</td><td>2.167208</td><td>2.626466</td><td>0.000000</td><td></td></tr> <tr><td>10 B</td><td>1.878322</td><td>1.787416</td><td>3.147300</td><td>3.371100</td><td>0.000000</td></tr> <tr><td>11 B</td><td>1.907067</td><td>2.971113</td><td>2.042414</td><td>3.503224</td><td>1.756537</td></tr> <tr><td>12 B</td><td>2.833235</td><td>1.824242</td><td>2.346640</td><td>2.182963</td><td>1.846128</td></tr> <tr> <th></th> <th>11</th> <th>12</th> </tr> <tr><td>11 B</td><td>0.000000</td><td></td></tr> <tr><td>12 B</td><td>1.783978</td><td>0.000000</td></tr> </tbody> </table>   |          | 1        | 2        | 3        | 4 | 5 | 1 B | 0.000000 |  |  |  |  | 2 B | 1.849569 | 0.000000 |  |  |  | 3 B | 1.777118 | 1.756163 | 0.000000 |  |  | 4 B | 1.829554 | 1.790826 | 2.970758 | 0.000000 |  | 5 B | 2.925366 | 1.734891 | 3.018056 | 1.802726 | 0.000000 | 6 B | 2.830319 | 1.876060 | 1.909112 | 2.883125 | 1.835774 | 7 B | 3.089529 | 2.968939 | 3.806778 | 1.849454 | 1.803410 | 8 Os | 2.341797 | 3.148357 | 2.044401 | 3.394145 | 3.553008 | 9 Os | 2.183059 | 3.372447 | 3.502187 | 2.164214 | 3.308154 | 10 B | 3.682001 | 3.030599 | 3.515632 | 2.966010 | 1.735562 | 11 B  | 3.658823 | 3.512771 | 3.057104 | 3.803853 | 3.016979 | 12 B  | 3.348066 | 3.683099 | 3.663940 | 3.084494 | 2.923643 |  | 6 | 7 | 8 | 9 | 10 | 6 B | 0.000000 |  |  |  |  | 7 B | 2.884118 | 0.000000 |  |  |  | 8 Os | 2.468895 | 3.395405 | 0.000000 |  |  | 9 Os | 3.654693 | 2.167208 | 2.626466 | 0.000000 |  | 10 B | 1.878322 | 1.787416 | 3.147300 | 3.371100 | 0.000000 | 11 B  | 1.907067 | 2.971113 | 2.042414 | 3.503224 | 1.756537 | 12 B  | 2.833235 | 1.824242 | 2.346640 | 2.182963 | 1.846128 |  | 11 | 12 | 11 B  | 0.000000 |  | 12 B  | 1.783978 | 0.000000 |
|                                                                                                                                | 1                                                                                                                                                                                                                                                                                                                                                                                                                                                                                                                                                                                                                                                                                                                                                                                                                                                                                                                                                                                                                                                                                                                                                                                                                                                                                                                                                                                                                                                                                                                                                                                                                                                                                                                                                                                                                                                                                                                                                                                                                                                                                                                                                                                                                                                                                                                                          | 2        | 3        | 4        | 5        |   |   |     |          |  |  |  |  |     |          |          |  |  |  |     |          |          |          |  |  |     |          |          |          |          |  |     |          |          |          |          |          |     |          |          |          |          |          |     |          |          |          |          |          |      |          |          |          |          |          |      |          |          |          |          |          |      |          |          |          |          |          |       |          |          |          |          |          |       |          |          |          |          |          |  |   |   |   |   |    |     |          |  |  |  |  |     |          |          |  |  |  |      |          |          |          |  |  |      |          |          |          |          |  |      |          |          |          |          |          |       |          |          |          |          |          |       |          |          |          |          |          |  |    |    |       |          |  |       |          |          |
| 1 B                                                                                                                            | 0.000000                                                                                                                                                                                                                                                                                                                                                                                                                                                                                                                                                                                                                                                                                                                                                                                                                                                                                                                                                                                                                                                                                                                                                                                                                                                                                                                                                                                                                                                                                                                                                                                                                                                                                                                                                                                                                                                                                                                                                                                                                                                                                                                                                                                                                                                                                                                                   |          |          |          |          |   |   |     |          |  |  |  |  |     |          |          |  |  |  |     |          |          |          |  |  |     |          |          |          |          |  |     |          |          |          |          |          |     |          |          |          |          |          |     |          |          |          |          |          |      |          |          |          |          |          |      |          |          |          |          |          |      |          |          |          |          |          |       |          |          |          |          |          |       |          |          |          |          |          |  |   |   |   |   |    |     |          |  |  |  |  |     |          |          |  |  |  |      |          |          |          |  |  |      |          |          |          |          |  |      |          |          |          |          |          |       |          |          |          |          |          |       |          |          |          |          |          |  |    |    |       |          |  |       |          |          |
| 2 B                                                                                                                            | 1.849569                                                                                                                                                                                                                                                                                                                                                                                                                                                                                                                                                                                                                                                                                                                                                                                                                                                                                                                                                                                                                                                                                                                                                                                                                                                                                                                                                                                                                                                                                                                                                                                                                                                                                                                                                                                                                                                                                                                                                                                                                                                                                                                                                                                                                                                                                                                                   | 0.000000 |          |          |          |   |   |     |          |  |  |  |  |     |          |          |  |  |  |     |          |          |          |  |  |     |          |          |          |          |  |     |          |          |          |          |          |     |          |          |          |          |          |     |          |          |          |          |          |      |          |          |          |          |          |      |          |          |          |          |          |      |          |          |          |          |          |       |          |          |          |          |          |       |          |          |          |          |          |  |   |   |   |   |    |     |          |  |  |  |  |     |          |          |  |  |  |      |          |          |          |  |  |      |          |          |          |          |  |      |          |          |          |          |          |       |          |          |          |          |          |       |          |          |          |          |          |  |    |    |       |          |  |       |          |          |
| 3 B                                                                                                                            | 1.777118                                                                                                                                                                                                                                                                                                                                                                                                                                                                                                                                                                                                                                                                                                                                                                                                                                                                                                                                                                                                                                                                                                                                                                                                                                                                                                                                                                                                                                                                                                                                                                                                                                                                                                                                                                                                                                                                                                                                                                                                                                                                                                                                                                                                                                                                                                                                   | 1.756163 | 0.000000 |          |          |   |   |     |          |  |  |  |  |     |          |          |  |  |  |     |          |          |          |  |  |     |          |          |          |          |  |     |          |          |          |          |          |     |          |          |          |          |          |     |          |          |          |          |          |      |          |          |          |          |          |      |          |          |          |          |          |      |          |          |          |          |          |       |          |          |          |          |          |       |          |          |          |          |          |  |   |   |   |   |    |     |          |  |  |  |  |     |          |          |  |  |  |      |          |          |          |  |  |      |          |          |          |          |  |      |          |          |          |          |          |       |          |          |          |          |          |       |          |          |          |          |          |  |    |    |       |          |  |       |          |          |
| 4 B                                                                                                                            | 1.829554                                                                                                                                                                                                                                                                                                                                                                                                                                                                                                                                                                                                                                                                                                                                                                                                                                                                                                                                                                                                                                                                                                                                                                                                                                                                                                                                                                                                                                                                                                                                                                                                                                                                                                                                                                                                                                                                                                                                                                                                                                                                                                                                                                                                                                                                                                                                   | 1.790826 | 2.970758 | 0.000000 |          |   |   |     |          |  |  |  |  |     |          |          |  |  |  |     |          |          |          |  |  |     |          |          |          |          |  |     |          |          |          |          |          |     |          |          |          |          |          |     |          |          |          |          |          |      |          |          |          |          |          |      |          |          |          |          |          |      |          |          |          |          |          |       |          |          |          |          |          |       |          |          |          |          |          |  |   |   |   |   |    |     |          |  |  |  |  |     |          |          |  |  |  |      |          |          |          |  |  |      |          |          |          |          |  |      |          |          |          |          |          |       |          |          |          |          |          |       |          |          |          |          |          |  |    |    |       |          |  |       |          |          |
| 5 B                                                                                                                            | 2.925366                                                                                                                                                                                                                                                                                                                                                                                                                                                                                                                                                                                                                                                                                                                                                                                                                                                                                                                                                                                                                                                                                                                                                                                                                                                                                                                                                                                                                                                                                                                                                                                                                                                                                                                                                                                                                                                                                                                                                                                                                                                                                                                                                                                                                                                                                                                                   | 1.734891 | 3.018056 | 1.802726 | 0.000000 |   |   |     |          |  |  |  |  |     |          |          |  |  |  |     |          |          |          |  |  |     |          |          |          |          |  |     |          |          |          |          |          |     |          |          |          |          |          |     |          |          |          |          |          |      |          |          |          |          |          |      |          |          |          |          |          |      |          |          |          |          |          |       |          |          |          |          |          |       |          |          |          |          |          |  |   |   |   |   |    |     |          |  |  |  |  |     |          |          |  |  |  |      |          |          |          |  |  |      |          |          |          |          |  |      |          |          |          |          |          |       |          |          |          |          |          |       |          |          |          |          |          |  |    |    |       |          |  |       |          |          |
| 6 B                                                                                                                            | 2.830319                                                                                                                                                                                                                                                                                                                                                                                                                                                                                                                                                                                                                                                                                                                                                                                                                                                                                                                                                                                                                                                                                                                                                                                                                                                                                                                                                                                                                                                                                                                                                                                                                                                                                                                                                                                                                                                                                                                                                                                                                                                                                                                                                                                                                                                                                                                                   | 1.876060 | 1.909112 | 2.883125 | 1.835774 |   |   |     |          |  |  |  |  |     |          |          |  |  |  |     |          |          |          |  |  |     |          |          |          |          |  |     |          |          |          |          |          |     |          |          |          |          |          |     |          |          |          |          |          |      |          |          |          |          |          |      |          |          |          |          |          |      |          |          |          |          |          |       |          |          |          |          |          |       |          |          |          |          |          |  |   |   |   |   |    |     |          |  |  |  |  |     |          |          |  |  |  |      |          |          |          |  |  |      |          |          |          |          |  |      |          |          |          |          |          |       |          |          |          |          |          |       |          |          |          |          |          |  |    |    |       |          |  |       |          |          |
| 7 B                                                                                                                            | 3.089529                                                                                                                                                                                                                                                                                                                                                                                                                                                                                                                                                                                                                                                                                                                                                                                                                                                                                                                                                                                                                                                                                                                                                                                                                                                                                                                                                                                                                                                                                                                                                                                                                                                                                                                                                                                                                                                                                                                                                                                                                                                                                                                                                                                                                                                                                                                                   | 2.968939 | 3.806778 | 1.849454 | 1.803410 |   |   |     |          |  |  |  |  |     |          |          |  |  |  |     |          |          |          |  |  |     |          |          |          |          |  |     |          |          |          |          |          |     |          |          |          |          |          |     |          |          |          |          |          |      |          |          |          |          |          |      |          |          |          |          |          |      |          |          |          |          |          |       |          |          |          |          |          |       |          |          |          |          |          |  |   |   |   |   |    |     |          |  |  |  |  |     |          |          |  |  |  |      |          |          |          |  |  |      |          |          |          |          |  |      |          |          |          |          |          |       |          |          |          |          |          |       |          |          |          |          |          |  |    |    |       |          |  |       |          |          |
| 8 Os                                                                                                                           | 2.341797                                                                                                                                                                                                                                                                                                                                                                                                                                                                                                                                                                                                                                                                                                                                                                                                                                                                                                                                                                                                                                                                                                                                                                                                                                                                                                                                                                                                                                                                                                                                                                                                                                                                                                                                                                                                                                                                                                                                                                                                                                                                                                                                                                                                                                                                                                                                   | 3.148357 | 2.044401 | 3.394145 | 3.553008 |   |   |     |          |  |  |  |  |     |          |          |  |  |  |     |          |          |          |  |  |     |          |          |          |          |  |     |          |          |          |          |          |     |          |          |          |          |          |     |          |          |          |          |          |      |          |          |          |          |          |      |          |          |          |          |          |      |          |          |          |          |          |       |          |          |          |          |          |       |          |          |          |          |          |  |   |   |   |   |    |     |          |  |  |  |  |     |          |          |  |  |  |      |          |          |          |  |  |      |          |          |          |          |  |      |          |          |          |          |          |       |          |          |          |          |          |       |          |          |          |          |          |  |    |    |       |          |  |       |          |          |
| 9 Os                                                                                                                           | 2.183059                                                                                                                                                                                                                                                                                                                                                                                                                                                                                                                                                                                                                                                                                                                                                                                                                                                                                                                                                                                                                                                                                                                                                                                                                                                                                                                                                                                                                                                                                                                                                                                                                                                                                                                                                                                                                                                                                                                                                                                                                                                                                                                                                                                                                                                                                                                                   | 3.372447 | 3.502187 | 2.164214 | 3.308154 |   |   |     |          |  |  |  |  |     |          |          |  |  |  |     |          |          |          |  |  |     |          |          |          |          |  |     |          |          |          |          |          |     |          |          |          |          |          |     |          |          |          |          |          |      |          |          |          |          |          |      |          |          |          |          |          |      |          |          |          |          |          |       |          |          |          |          |          |       |          |          |          |          |          |  |   |   |   |   |    |     |          |  |  |  |  |     |          |          |  |  |  |      |          |          |          |  |  |      |          |          |          |          |  |      |          |          |          |          |          |       |          |          |          |          |          |       |          |          |          |          |          |  |    |    |       |          |  |       |          |          |
| 10 B                                                                                                                           | 3.682001                                                                                                                                                                                                                                                                                                                                                                                                                                                                                                                                                                                                                                                                                                                                                                                                                                                                                                                                                                                                                                                                                                                                                                                                                                                                                                                                                                                                                                                                                                                                                                                                                                                                                                                                                                                                                                                                                                                                                                                                                                                                                                                                                                                                                                                                                                                                   | 3.030599 | 3.515632 | 2.966010 | 1.735562 |   |   |     |          |  |  |  |  |     |          |          |  |  |  |     |          |          |          |  |  |     |          |          |          |          |  |     |          |          |          |          |          |     |          |          |          |          |          |     |          |          |          |          |          |      |          |          |          |          |          |      |          |          |          |          |          |      |          |          |          |          |          |       |          |          |          |          |          |       |          |          |          |          |          |  |   |   |   |   |    |     |          |  |  |  |  |     |          |          |  |  |  |      |          |          |          |  |  |      |          |          |          |          |  |      |          |          |          |          |          |       |          |          |          |          |          |       |          |          |          |          |          |  |    |    |       |          |  |       |          |          |
| 11 B                                                                                                                           | 3.658823                                                                                                                                                                                                                                                                                                                                                                                                                                                                                                                                                                                                                                                                                                                                                                                                                                                                                                                                                                                                                                                                                                                                                                                                                                                                                                                                                                                                                                                                                                                                                                                                                                                                                                                                                                                                                                                                                                                                                                                                                                                                                                                                                                                                                                                                                                                                   | 3.512771 | 3.057104 | 3.803853 | 3.016979 |   |   |     |          |  |  |  |  |     |          |          |  |  |  |     |          |          |          |  |  |     |          |          |          |          |  |     |          |          |          |          |          |     |          |          |          |          |          |     |          |          |          |          |          |      |          |          |          |          |          |      |          |          |          |          |          |      |          |          |          |          |          |       |          |          |          |          |          |       |          |          |          |          |          |  |   |   |   |   |    |     |          |  |  |  |  |     |          |          |  |  |  |      |          |          |          |  |  |      |          |          |          |          |  |      |          |          |          |          |          |       |          |          |          |          |          |       |          |          |          |          |          |  |    |    |       |          |  |       |          |          |
| 12 B                                                                                                                           | 3.348066                                                                                                                                                                                                                                                                                                                                                                                                                                                                                                                                                                                                                                                                                                                                                                                                                                                                                                                                                                                                                                                                                                                                                                                                                                                                                                                                                                                                                                                                                                                                                                                                                                                                                                                                                                                                                                                                                                                                                                                                                                                                                                                                                                                                                                                                                                                                   | 3.683099 | 3.663940 | 3.084494 | 2.923643 |   |   |     |          |  |  |  |  |     |          |          |  |  |  |     |          |          |          |  |  |     |          |          |          |          |  |     |          |          |          |          |          |     |          |          |          |          |          |     |          |          |          |          |          |      |          |          |          |          |          |      |          |          |          |          |          |      |          |          |          |          |          |       |          |          |          |          |          |       |          |          |          |          |          |  |   |   |   |   |    |     |          |  |  |  |  |     |          |          |  |  |  |      |          |          |          |  |  |      |          |          |          |          |  |      |          |          |          |          |          |       |          |          |          |          |          |       |          |          |          |          |          |  |    |    |       |          |  |       |          |          |
|                                                                                                                                | 6                                                                                                                                                                                                                                                                                                                                                                                                                                                                                                                                                                                                                                                                                                                                                                                                                                                                                                                                                                                                                                                                                                                                                                                                                                                                                                                                                                                                                                                                                                                                                                                                                                                                                                                                                                                                                                                                                                                                                                                                                                                                                                                                                                                                                                                                                                                                          | 7        | 8        | 9        | 10       |   |   |     |          |  |  |  |  |     |          |          |  |  |  |     |          |          |          |  |  |     |          |          |          |          |  |     |          |          |          |          |          |     |          |          |          |          |          |     |          |          |          |          |          |      |          |          |          |          |          |      |          |          |          |          |          |      |          |          |          |          |          |       |          |          |          |          |          |       |          |          |          |          |          |  |   |   |   |   |    |     |          |  |  |  |  |     |          |          |  |  |  |      |          |          |          |  |  |      |          |          |          |          |  |      |          |          |          |          |          |       |          |          |          |          |          |       |          |          |          |          |          |  |    |    |       |          |  |       |          |          |
| 6 B                                                                                                                            | 0.000000                                                                                                                                                                                                                                                                                                                                                                                                                                                                                                                                                                                                                                                                                                                                                                                                                                                                                                                                                                                                                                                                                                                                                                                                                                                                                                                                                                                                                                                                                                                                                                                                                                                                                                                                                                                                                                                                                                                                                                                                                                                                                                                                                                                                                                                                                                                                   |          |          |          |          |   |   |     |          |  |  |  |  |     |          |          |  |  |  |     |          |          |          |  |  |     |          |          |          |          |  |     |          |          |          |          |          |     |          |          |          |          |          |     |          |          |          |          |          |      |          |          |          |          |          |      |          |          |          |          |          |      |          |          |          |          |          |       |          |          |          |          |          |       |          |          |          |          |          |  |   |   |   |   |    |     |          |  |  |  |  |     |          |          |  |  |  |      |          |          |          |  |  |      |          |          |          |          |  |      |          |          |          |          |          |       |          |          |          |          |          |       |          |          |          |          |          |  |    |    |       |          |  |       |          |          |
| 7 B                                                                                                                            | 2.884118                                                                                                                                                                                                                                                                                                                                                                                                                                                                                                                                                                                                                                                                                                                                                                                                                                                                                                                                                                                                                                                                                                                                                                                                                                                                                                                                                                                                                                                                                                                                                                                                                                                                                                                                                                                                                                                                                                                                                                                                                                                                                                                                                                                                                                                                                                                                   | 0.000000 |          |          |          |   |   |     |          |  |  |  |  |     |          |          |  |  |  |     |          |          |          |  |  |     |          |          |          |          |  |     |          |          |          |          |          |     |          |          |          |          |          |     |          |          |          |          |          |      |          |          |          |          |          |      |          |          |          |          |          |      |          |          |          |          |          |       |          |          |          |          |          |       |          |          |          |          |          |  |   |   |   |   |    |     |          |  |  |  |  |     |          |          |  |  |  |      |          |          |          |  |  |      |          |          |          |          |  |      |          |          |          |          |          |       |          |          |          |          |          |       |          |          |          |          |          |  |    |    |       |          |  |       |          |          |
| 8 Os                                                                                                                           | 2.468895                                                                                                                                                                                                                                                                                                                                                                                                                                                                                                                                                                                                                                                                                                                                                                                                                                                                                                                                                                                                                                                                                                                                                                                                                                                                                                                                                                                                                                                                                                                                                                                                                                                                                                                                                                                                                                                                                                                                                                                                                                                                                                                                                                                                                                                                                                                                   | 3.395405 | 0.000000 |          |          |   |   |     |          |  |  |  |  |     |          |          |  |  |  |     |          |          |          |  |  |     |          |          |          |          |  |     |          |          |          |          |          |     |          |          |          |          |          |     |          |          |          |          |          |      |          |          |          |          |          |      |          |          |          |          |          |      |          |          |          |          |          |       |          |          |          |          |          |       |          |          |          |          |          |  |   |   |   |   |    |     |          |  |  |  |  |     |          |          |  |  |  |      |          |          |          |  |  |      |          |          |          |          |  |      |          |          |          |          |          |       |          |          |          |          |          |       |          |          |          |          |          |  |    |    |       |          |  |       |          |          |
| 9 Os                                                                                                                           | 3.654693                                                                                                                                                                                                                                                                                                                                                                                                                                                                                                                                                                                                                                                                                                                                                                                                                                                                                                                                                                                                                                                                                                                                                                                                                                                                                                                                                                                                                                                                                                                                                                                                                                                                                                                                                                                                                                                                                                                                                                                                                                                                                                                                                                                                                                                                                                                                   | 2.167208 | 2.626466 | 0.000000 |          |   |   |     |          |  |  |  |  |     |          |          |  |  |  |     |          |          |          |  |  |     |          |          |          |          |  |     |          |          |          |          |          |     |          |          |          |          |          |     |          |          |          |          |          |      |          |          |          |          |          |      |          |          |          |          |          |      |          |          |          |          |          |       |          |          |          |          |          |       |          |          |          |          |          |  |   |   |   |   |    |     |          |  |  |  |  |     |          |          |  |  |  |      |          |          |          |  |  |      |          |          |          |          |  |      |          |          |          |          |          |       |          |          |          |          |          |       |          |          |          |          |          |  |    |    |       |          |  |       |          |          |
| 10 B                                                                                                                           | 1.878322                                                                                                                                                                                                                                                                                                                                                                                                                                                                                                                                                                                                                                                                                                                                                                                                                                                                                                                                                                                                                                                                                                                                                                                                                                                                                                                                                                                                                                                                                                                                                                                                                                                                                                                                                                                                                                                                                                                                                                                                                                                                                                                                                                                                                                                                                                                                   | 1.787416 | 3.147300 | 3.371100 | 0.000000 |   |   |     |          |  |  |  |  |     |          |          |  |  |  |     |          |          |          |  |  |     |          |          |          |          |  |     |          |          |          |          |          |     |          |          |          |          |          |     |          |          |          |          |          |      |          |          |          |          |          |      |          |          |          |          |          |      |          |          |          |          |          |       |          |          |          |          |          |       |          |          |          |          |          |  |   |   |   |   |    |     |          |  |  |  |  |     |          |          |  |  |  |      |          |          |          |  |  |      |          |          |          |          |  |      |          |          |          |          |          |       |          |          |          |          |          |       |          |          |          |          |          |  |    |    |       |          |  |       |          |          |
| 11 B                                                                                                                           | 1.907067                                                                                                                                                                                                                                                                                                                                                                                                                                                                                                                                                                                                                                                                                                                                                                                                                                                                                                                                                                                                                                                                                                                                                                                                                                                                                                                                                                                                                                                                                                                                                                                                                                                                                                                                                                                                                                                                                                                                                                                                                                                                                                                                                                                                                                                                                                                                   | 2.971113 | 2.042414 | 3.503224 | 1.756537 |   |   |     |          |  |  |  |  |     |          |          |  |  |  |     |          |          |          |  |  |     |          |          |          |          |  |     |          |          |          |          |          |     |          |          |          |          |          |     |          |          |          |          |          |      |          |          |          |          |          |      |          |          |          |          |          |      |          |          |          |          |          |       |          |          |          |          |          |       |          |          |          |          |          |  |   |   |   |   |    |     |          |  |  |  |  |     |          |          |  |  |  |      |          |          |          |  |  |      |          |          |          |          |  |      |          |          |          |          |          |       |          |          |          |          |          |       |          |          |          |          |          |  |    |    |       |          |  |       |          |          |
| 12 B                                                                                                                           | 2.833235                                                                                                                                                                                                                                                                                                                                                                                                                                                                                                                                                                                                                                                                                                                                                                                                                                                                                                                                                                                                                                                                                                                                                                                                                                                                                                                                                                                                                                                                                                                                                                                                                                                                                                                                                                                                                                                                                                                                                                                                                                                                                                                                                                                                                                                                                                                                   | 1.824242 | 2.346640 | 2.182963 | 1.846128 |   |   |     |          |  |  |  |  |     |          |          |  |  |  |     |          |          |          |  |  |     |          |          |          |          |  |     |          |          |          |          |          |     |          |          |          |          |          |     |          |          |          |          |          |      |          |          |          |          |          |      |          |          |          |          |          |      |          |          |          |          |          |       |          |          |          |          |          |       |          |          |          |          |          |  |   |   |   |   |    |     |          |  |  |  |  |     |          |          |  |  |  |      |          |          |          |  |  |      |          |          |          |          |  |      |          |          |          |          |          |       |          |          |          |          |          |       |          |          |          |          |          |  |    |    |       |          |  |       |          |          |
|                                                                                                                                | 11                                                                                                                                                                                                                                                                                                                                                                                                                                                                                                                                                                                                                                                                                                                                                                                                                                                                                                                                                                                                                                                                                                                                                                                                                                                                                                                                                                                                                                                                                                                                                                                                                                                                                                                                                                                                                                                                                                                                                                                                                                                                                                                                                                                                                                                                                                                                         | 12       |          |          |          |   |   |     |          |  |  |  |  |     |          |          |  |  |  |     |          |          |          |  |  |     |          |          |          |          |  |     |          |          |          |          |          |     |          |          |          |          |          |     |          |          |          |          |          |      |          |          |          |          |          |      |          |          |          |          |          |      |          |          |          |          |          |       |          |          |          |          |          |       |          |          |          |          |          |  |   |   |   |   |    |     |          |  |  |  |  |     |          |          |  |  |  |      |          |          |          |  |  |      |          |          |          |          |  |      |          |          |          |          |          |       |          |          |          |          |          |       |          |          |          |          |          |  |    |    |       |          |  |       |          |          |
| 11 B                                                                                                                           | 0.000000                                                                                                                                                                                                                                                                                                                                                                                                                                                                                                                                                                                                                                                                                                                                                                                                                                                                                                                                                                                                                                                                                                                                                                                                                                                                                                                                                                                                                                                                                                                                                                                                                                                                                                                                                                                                                                                                                                                                                                                                                                                                                                                                                                                                                                                                                                                                   |          |          |          |          |   |   |     |          |  |  |  |  |     |          |          |  |  |  |     |          |          |          |  |  |     |          |          |          |          |  |     |          |          |          |          |          |     |          |          |          |          |          |     |          |          |          |          |          |      |          |          |          |          |          |      |          |          |          |          |          |      |          |          |          |          |          |       |          |          |          |          |          |       |          |          |          |          |          |  |   |   |   |   |    |     |          |  |  |  |  |     |          |          |  |  |  |      |          |          |          |  |  |      |          |          |          |          |  |      |          |          |          |          |          |       |          |          |          |          |          |       |          |          |          |          |          |  |    |    |       |          |  |       |          |          |
| 12 B                                                                                                                           | 1.783978                                                                                                                                                                                                                                                                                                                                                                                                                                                                                                                                                                                                                                                                                                                                                                                                                                                                                                                                                                                                                                                                                                                                                                                                                                                                                                                                                                                                                                                                                                                                                                                                                                                                                                                                                                                                                                                                                                                                                                                                                                                                                                                                                                                                                                                                                                                                   | 0.000000 |          |          |          |   |   |     |          |  |  |  |  |     |          |          |  |  |  |     |          |          |          |  |  |     |          |          |          |          |  |     |          |          |          |          |          |     |          |          |          |          |          |     |          |          |          |          |          |      |          |          |          |          |          |      |          |          |          |          |          |      |          |          |          |          |          |       |          |          |          |          |          |       |          |          |          |          |          |  |   |   |   |   |    |     |          |  |  |  |  |     |          |          |  |  |  |      |          |          |          |  |  |      |          |          |          |          |  |      |          |          |          |          |          |       |          |          |          |          |          |       |          |          |          |          |          |  |    |    |       |          |  |       |          |          |

Table S10C. Energy ranking of the  $\text{Cp}_2\text{Os}_2\text{B}_{10}\text{H}_{10}$  structures.

| No | Initial structure            | Final energy (a.u.) | $\Delta E$ kcal/mole |
|----|------------------------------|---------------------|----------------------|
| 1  | 2-Os-Cuboctaedru-g_r-103     | -823.25459160       | 0.00                 |
| 2  | 2-Os-Cuboctaedru-g_r-19      | -823.25459155       | 0.00                 |
| 3  | 2-Os-Cuboctaedru-g imag      | -823.25439392       | 0.12                 |
| 4  | 2-Os-Cuboctaedru-e           | -823.23117850       | 14.69                |
| 5  | 1-Os-Icos-a_r-30             | -823.23110523       | 14.74                |
| 6  | 1-Os-Icos-a_r-38             | -823.23109728       | 14.74                |
| 7  | 1-Os-Icos-a imag             | -823.23101573       | 14.79                |
| 8  | 3-Os-Anticuboh-e             | -823.22763413       | 16.92                |
| 9  | 4-Os-new structure-2         | -823.22347701       | 19.52                |
| 10 | 3-Os-Anticuboh-j_r-18        | -823.22246461       | 20.16                |
| 11 | 3-Os-Anticuboh-j_r-959       | -823.22246461       | 20.16                |
| 12 | 3-Os-Anticuboh-j_r-54        | -823.22243273       | 20.18                |
| 13 | 2-Os-Cuboctaedru-h           | -823.22156564       | 20.72                |
| 14 | 3-Os-Anticuboh-i_r-225       | -823.22156563       | 20.72                |
| 15 | 4-Os-new structure-3         | -823.22011969       | 21.63                |
| 16 | 3-Os-Structure-4             | -823.21042409       | 27.72                |
| 17 | 3-Os-Anticuboh-i_r-156-130   | -823.20602605       | 30.47                |
| 18 | 2-Os-Cuboctaedru-b           | -823.20360606       | 31.99                |
| 19 | 3-Os-Anticuboh-h_r-120       | -823.20360606       | 31.99                |
| 20 | 2-Os-Cuboctaedru-a           | -823.19774616       | 35.67                |
| 21 | 3-Os-Anticuboh-a_r-56        | -823.19230857       | 39.08                |
| 22 | 3-Os-Anticuboh-c             | -823.19230856       | 39.08                |
| 23 | 2-Os-Cuboctaedru-d           | -823.18673771       | 42.58                |
| 24 | 1-Os-Icos-b                  | -823.18451997       | 43.97                |
| 25 | 2-Os-Cuboctaedru-f           | -823.18451997       | 43.97                |
| 26 | 3-Os-Anticuboh-d             | -823.18451997       | 43.97                |
| 27 | 3-Os-Anticuboh-i_r-130       | -823.18363437       | 44.53                |
| 28 | 2-Os-Cuboctaedru-i_r-32      | -823.18276181       | 45.07                |
| 29 | 2-Os-Cuboctaedru-i_r-37      | -823.18262989       | 45.16                |
| 30 | 1-Os-Icos-c                  | -823.18257184       | 45.19                |
| 31 | 2-Os-Cuboctaedru-l i-37 -32  | -823.18011745       | 46.73                |
| 32 | 3-Os-Anticuboh-f             | -823.16139508       | 58.48                |
| 33 | 3-Os-Anticuboh-b             | -823.15830848       | 60.42                |
| 34 | 2-Os-Cuboctaedru-c           | -823.15703372       | 61.22                |
| 35 | 3-Os-Anticuboh-i_r-156 i-130 | -823.13045862       | 77.89                |
| 36 | 3-Os-Anticuboh-a i-56        | -823.12334550       | 82.36                |
| 37 | 3-Os-Anticuboh-j imag        | -823.12286861       | 82.66                |
| 38 | 3-Os-Anticuboh-g             | -823.11943075       | 84.81                |
| 39 | 3-Os-Anticuboh-i_r-337       | -823.11941289       | 84.82                |
| 40 | 3-Os-Anticuboh-h i-120       | -823.11088845       | 90.17                |
| 41 | 3-Os-Bipypr-decag            | -823.05921115       | 122.60               |
| 42 | 3-Os-Anticuboh-l imag        | -823.01407361       | 150.93               |

### Complete Gaussian09 Reference (reference 33)

Gaussian 09, Revision A.02,

M. J. Frisch, G. W. Trucks, H. B. Schlegel, G. E. Scuseria, M. A. Robb, J. R. Cheeseman, G. Scalmani, V. Barone, B. Mennucci, G. A. Petersson, H. Nakatsuji, M. Caricato, X. Li, H. P. Hratchian, A. F. Izmaylov, J. Bloino, G. Zheng, J. L. Sonnenberg, M. Hada, M. Ehara, K. Toyota, R. Fukuda, J. Hasegawa, M. Ishida, T. Nakajima, Y. Honda, O. Kitao, H. Nakai, T. Vreven, J. A. Montgomery, Jr., J. E. Peralta, F. Ogliaro, M. Bearpark, J. J. Heyd, E. Brothers, K. N. Kudin, V. N. Staroverov, R. Kobayashi, J. Normand, K. Raghavachari, A. Rendell, J. C. Burant, S. S. Iyengar, J. Tomasi, M. Cossi, N. Rega, J. M. Millam, M. Klene, J. E. Knox, J. B. Cross, V. Bakken, C. Adamo, J. Jaramillo, R. Gomperts, R. E. Stratmann, O. Yazyev, A. J. Austin, R. Cammi, C. Pomelli, J. W. Ochterski, R. L. Martin, K. Morokuma, V. G. Zakrzewski, G. A. Voth, P. Salvador, J. J. Dannenberg, S. Dapprich, A. D. Daniels, O. Farkas, J. B. Foresman, J. V. Ortiz, J. Cioslowski, and D. J. Fox, Gaussian, Inc., Wallingford CT, 2009.
